# Supplementary material for: Humanization of wildlife gut microbiota in urban environments
Source: eLife. 2022 May 31;11:e76381. doi: 10.7554/eLife.76381 (PMC9203057; doi:10.7554/eLife.76381)
Supplement: Supplementary file 1. [file elife-76381-supp1.xlsx]

## Sheet: Sheet1
Table S1. Metadata for all samples.
SampleID	scientific_name	Host Population
13566.01F.SRR8774489	Canis latrans	Coyote (Urban)
13566.02F.SRR8774488	Canis latrans	Coyote (Urban)
13566.12F.SRR8774406	Canis latrans	Coyote (Urban)
13566.17F.SRR8774405	Canis latrans	Coyote (Urban)
13566.66F.SRR8774451	Canis latrans	Coyote (Urban)
13566.69F.SRR8774458	Canis latrans	Coyote (Urban)
13566.70F.SRR8774459	Canis latrans	Coyote (Urban)
13566.71F.SRR8774435	Canis latrans	Coyote (Urban)
13566.73F.SRR8774433	Canis latrans	Coyote (Urban)
13566.74F.SRR8774432	Canis latrans	Coyote (Urban)
13566.75F.SRR8774439	Canis latrans	Coyote (Urban)
13566.03F.SRR8774487	Canis latrans	Coyote (Rural)
13566.04F.SRR8774486	Canis latrans	Coyote (Rural)
13566.05F.SRR8774485	Canis latrans	Coyote (Rural)
13566.06F.SRR8774484	Canis latrans	Coyote (Rural)
13566.07F.SRR8774483	Canis latrans	Coyote (Rural)
13566.08F.SRR8774482	Canis latrans	Coyote (Rural)
13566.09F.SRR8774491	Canis latrans	Coyote (Rural)
13566.10F.SRR8774490	Canis latrans	Coyote (Rural)
13566.11F.SRR8774407	Canis latrans	Coyote (Rural)
13566.13F.SRR8774409	Canis latrans	Coyote (Rural)
13566.14F.SRR8774408	Canis latrans	Coyote (Rural)
13566.15F.SRR8774403	Canis latrans	Coyote (Rural)
13566.16F.SRR8774402	Canis latrans	Coyote (Rural)
13566.18F.SRR8774404	Canis latrans	Coyote (Rural)
13566.19F.SRR8774401	Canis latrans	Coyote (Rural)
13566.20F.SRR8774400	Canis latrans	Coyote (Rural)
13566.21F.SRR8774350	Canis latrans	Coyote (Rural)
13566.22F.SRR8774351	Canis latrans	Coyote (Rural)
13566.23F.SRR8774352	Canis latrans	Coyote (Rural)
13566.24F.SRR8774353	Canis latrans	Coyote (Rural)
13566.25F.SRR8774354	Canis latrans	Coyote (Rural)
13566.26F.SRR8774355	Canis latrans	Coyote (Rural)
13566.27F.SRR8774356	Canis latrans	Coyote (Rural)
13566.28F.SRR8774357	Canis latrans	Coyote (Rural)
13566.29F.SRR8774358	Canis latrans	Coyote (Rural)
13566.30F.SRR8774359	Canis latrans	Coyote (Rural)
13566.31F.SRR8774479	Canis latrans	Coyote (Rural)
13566.32F.SRR8774478	Canis latrans	Coyote (Rural)
13566.33F.SRR8774477	Canis latrans	Coyote (Rural)
13566.34F.SRR8774476	Canis latrans	Coyote (Rural)
13566.35F.SRR8774475	Canis latrans	Coyote (Rural)
13566.36F.SRR8774474	Canis latrans	Coyote (Rural)
13566.37F.SRR8774473	Canis latrans	Coyote (Rural)
13566.38F.SRR8774472	Canis latrans	Coyote (Rural)
13566.39F.SRR8774481	Canis latrans	Coyote (Rural)
13566.40F.SRR8774480	Canis latrans	Coyote (Rural)
13566.41F.SRR8774494	Canis latrans	Coyote (Rural)
13566.43F.SRR8774492	Canis latrans	Coyote (Rural)
13566.44F.SRR8774493	Canis latrans	Coyote (Rural)
13566.45F.SRR8774498	Canis latrans	Coyote (Rural)
13566.46F.SRR8774499	Canis latrans	Coyote (Rural)
13566.47F.SRR8774496	Canis latrans	Coyote (Rural)
13566.48F.SRR8774497	Canis latrans	Coyote (Rural)
13566.49F.SRR8774500	Canis latrans	Coyote (Rural)
13566.50F.SRR8774501	Canis latrans	Coyote (Rural)
13566.51F.SRR8774463	Canis latrans	Coyote (Rural)
13566.52F.SRR8774462	Canis latrans	Coyote (Rural)
13566.54F.SRR8774464	Canis latrans	Coyote (Rural)
13566.55F.SRR8774467	Canis latrans	Coyote (Rural)
13566.56F.SRR8774466	Canis latrans	Coyote (Rural)
13566.57F.SRR8774469	Canis latrans	Coyote (Rural)
13566.58F.SRR8774468	Canis latrans	Coyote (Rural)
13566.59F.SRR8774471	Canis latrans	Coyote (Rural)
13566.60F.SRR8774470	Canis latrans	Coyote (Rural)
13566.61F.SRR8774454	Canis latrans	Coyote (Rural)
13566.62F.SRR8774455	Canis latrans	Coyote (Rural)
13566.63F.SRR8774456	Canis latrans	Coyote (Rural)
13566.64F.SRR8774457	Canis latrans	Coyote (Rural)
13566.65F.SRR8774450	Canis latrans	Coyote (Rural)
13566.67F.SRR8774452	Canis latrans	Coyote (Rural)
13566.68F.SRR8774453	Canis latrans	Coyote (Rural)
13566.72F.SRR8774434	Canis latrans	Coyote (Rural)
13566.76F.SRR8774438	Canis latrans	Coyote (Rural)
13332.AF113.YU.CR	cristatellus	Mayaguez (Urban)
13332.AF114.YU.CR	cristatellus	Mayaguez (Urban)
13332.AF115.YU.CR	cristatellus	Mayaguez (Urban)
13332.AF116.YU.CR	cristatellus	Mayaguez (Urban)
13332.AF117.YU.CR	cristatellus	Mayaguez (Urban)
13332.AF118.YU.CR	cristatellus	Mayaguez (Urban)
13332.AF119.YU.CR	cristatellus	Mayaguez (Urban)
13332.AF120.YU.CR	cristatellus	Mayaguez (Urban)
13332.AF121.YU.CR	cristatellus	Mayaguez (Urban)
13332.AF122.YU.CR	cristatellus	Mayaguez (Urban)
13332.AF003.BB.CR	cristatellus	Quemado 1 (Rural)
13332.AF008.BB.CR	cristatellus	Quemado 1 (Rural)
13332.AF010.BB.CR	cristatellus	Quemado 1 (Rural)
13332.AF011.BB.CR	cristatellus	Quemado 1 (Rural)
13332.AF012.BB.CR	cristatellus	Quemado 1 (Rural)
13332.AF013.BB.CR	cristatellus	Quemado 1 (Rural)
13332.AF046.BB.CR	cristatellus	Quemado 1 (Rural)
13332.AF047.BB.CR	cristatellus	Quemado 1 (Rural)
13332.AF048.BB.CR	cristatellus	Quemado 1 (Rural)
13332.AF077.MR.CR	cristatellus	Maricao (Rural)
13332.AF078.MR.CR	cristatellus	Maricao (Rural)
13332.AF080.MR.CR	cristatellus	Maricao (Rural)
13332.AF082.MR.CR	cristatellus	Maricao (Rural)
13332.AF084.MR.CR	cristatellus	Maricao (Rural)
13332.AF085.MR.CR	cristatellus	Maricao (Rural)
13332.AF087.MR.CR	cristatellus	Maricao (Rural)
13332.AF088.MR.CR	cristatellus	Maricao (Rural)
13332.AF092.MR.CR	cristatellus	Maricao (Rural)
13332.AF093.MR.CR	cristatellus	Maricao (Rural)
13332.AF094.MR.CR	cristatellus	Maricao (Rural)
13332.AF104.YF.CR	cristatellus	Quemado 2 (Rural)
13332.AF105.YF.CR	cristatellus	Quemado 2 (Rural)
13332.AF106.YF.CR	cristatellus	Quemado 2 (Rural)
13332.AF108.YF.CR	cristatellus	Quemado 2 (Rural)
13332.AF109.YF.CR	cristatellus	Quemado 2 (Rural)
13332.AF110.YF.CR	cristatellus	Quemado 2 (Rural)
13332.AF111.YF.CR	cristatellus	Quemado 2 (Rural)
13332.AF112.YF.CR	cristatellus	Quemado 2 (Rural)
13332.AF143.YF.CR	cristatellus	Quemado 2 (Rural)
13332.AF144.YF.CR	cristatellus	Quemado 2 (Rural)
13332.AF079.MR.EV	evermanni	Maricao (Rural) (non-cristatellus)
13332.AF081.MR.EV	evermanni	Maricao (Rural) (non-cristatellus)
13332.AF083.MR.EV	evermanni	Maricao (Rural) (non-cristatellus)
13332.AF090.MR.EV	evermanni	Maricao (Rural) (non-cristatellus)
13332.AF021.MR.EV	evermanni	Maricao (Rural) (non-cristatellus)
13332.AF024.MR.EV	evermanni	Maricao (Rural) (non-cristatellus)
13332.AF061.MR.EV	evermanni	Maricao (Rural) (non-cristatellus)
13332.AF064.MR.EV	evermanni	Maricao (Rural) (non-cristatellus)
13332.AF033.MR.GU	gundlachi	Maricao (Rural) (non-cristatellus)
13332.AF062.MR.GU	gundlachi	Maricao (Rural) (non-cristatellus)
13332.AF071.MR.GU	gundlachi	Maricao (Rural) (non-cristatellus)
850.Amz1teenF	Homo sapien	Venezuela (Rural)
850.Amz29adlt	Homo sapien	Venezuela (Rural)
850.Amz2adltF	Homo sapien	Venezuela (Rural)
850.Amz30adlt	Homo sapien	Venezuela (Rural)
850.Amz31adlt	Homo sapien	Venezuela (Rural)
850.Amz32eldF	Homo sapien	Venezuela (Rural)
850.Amz33eld	Homo sapien	Venezuela (Rural)
850.Amz34eld	Homo sapien	Venezuela (Rural)
850.Amz4adltF	Homo sapien	Venezuela (Rural)
850.Amz5eldF	Homo sapien	Venezuela (Rural)
850.Amz5teenF	Homo sapien	Venezuela (Rural)
850.Amz6eldF	Homo sapien	Venezuela (Rural)
850.Amz6eldM	Homo sapien	Venezuela (Rural)
850.Amz6teen	Homo sapien	Venezuela (Rural)
850.Amz7adltF	Homo sapien	Venezuela (Rural)
850.Amz7eldM	Homo sapien	Venezuela (Rural)
850.AmzC10adltF1	Homo sapien	Venezuela (Rural)
850.AmzC10adltF2	Homo sapien	Venezuela (Rural)
850.AmzC11adltF1	Homo sapien	Venezuela (Rural)
850.AmzC11adltF2	Homo sapien	Venezuela (Rural)
850.AmzC11adltF3	Homo sapien	Venezuela (Rural)
850.AmzC12adltF	Homo sapien	Venezuela (Rural)
850.AmzC29adltF	Homo sapien	Venezuela (Rural)
850.AmzC2adltF	Homo sapien	Venezuela (Rural)
850.AmzC30adltF	Homo sapien	Venezuela (Rural)
850.AmzC31adltF	Homo sapien	Venezuela (Rural)
850.AmzC32adltF	Homo sapien	Venezuela (Rural)
850.AmzC33adltF	Homo sapien	Venezuela (Rural)
850.AmzC3adltF	Homo sapien	Venezuela (Rural)
850.AmzC3adltM	Homo sapien	Venezuela (Rural)
850.AmzC4adltF	Homo sapien	Venezuela (Rural)
850.AmzC5adltF	Homo sapien	Venezuela (Rural)
850.AmzC6adltF	Homo sapien	Venezuela (Rural)
850.AmzC7adltF	Homo sapien	Venezuela (Rural)
850.AmzC8adltM	Homo sapien	Venezuela (Rural)
850.AmzC9adltF	Homo sapien	Venezuela (Rural)
850.AmzC9adltM	Homo sapien	Venezuela (Rural)
14419.ERR3618858	Homo sapien	Yaounde (Urban)
14419.ERR3618866	Homo sapien	Yaounde (Urban)
14419.ERR3618870	Homo sapien	Yaounde (Urban)
14419.ERR3618875	Homo sapien	Yaounde (Urban)
14419.ERR3618891	Homo sapien	Yaounde (Urban)
14419.ERR3618894	Homo sapien	Yaounde (Urban)
14419.ERR3618898	Homo sapien	Yaounde (Urban)
14419.ERR3618902	Homo sapien	Yaounde (Urban)
14419.ERR3618916	Homo sapien	Yaounde (Urban)
14419.ERR3618921	Homo sapien	Yaounde (Urban)
14419.ERR3618934	Homo sapien	Yaounde (Urban)
14419.ERR3618938	Homo sapien	Yaounde (Urban)
14419.ERR3618954	Homo sapien	Yaounde (Urban)
14419.ERR3618972	Homo sapien	Yaounde (Urban)
14419.ERR3618856	Homo sapien	Yaounde (Urban)
14419.ERR3618857	Homo sapien	Yaounde (Urban)
14419.ERR3618872	Homo sapien	Yaounde (Urban)
14419.ERR3618873	Homo sapien	Yaounde (Urban)
14419.ERR3618892	Homo sapien	Yaounde (Urban)
14419.ERR3618897	Homo sapien	Yaounde (Urban)
14419.ERR3618904	Homo sapien	Yaounde (Urban)
14419.ERR3618908	Homo sapien	Yaounde (Urban)
14419.ERR3618922	Homo sapien	Yaounde (Urban)
14419.ERR3618923	Homo sapien	Yaounde (Urban)
14419.ERR3618926	Homo sapien	Yaounde (Urban)
14419.ERR3618927	Homo sapien	Yaounde (Urban)
14419.ERR3618928	Homo sapien	Yaounde (Urban)
14419.ERR3618933	Homo sapien	Yaounde (Urban)
14419.ERR3618940	Homo sapien	Yaounde (Urban)
14419.ERR3618942	Homo sapien	Yaounde (Urban)
14419.ERR3618945	Homo sapien	Yaounde (Urban)
14419.ERR3618948	Homo sapien	Yaounde (Urban)
14419.ERR3618855	Homo sapien	Mbalmayo (Semi-Urban)
14419.ERR3618862	Homo sapien	Mbalmayo (Semi-Urban)
14419.ERR3618912	Homo sapien	Mbalmayo (Semi-Urban)
14419.ERR3618917	Homo sapien	Mbalmayo (Semi-Urban)
14419.ERR3618918	Homo sapien	Mbalmayo (Semi-Urban)
14419.ERR3618946	Homo sapien	Mbalmayo (Semi-Urban)
14419.ERR3618949	Homo sapien	Mbalmayo (Semi-Urban)
14419.ERR3618956	Homo sapien	Mbalmayo (Semi-Urban)
14419.ERR3618959	Homo sapien	Mbalmayo (Semi-Urban)
14419.ERR3618961	Homo sapien	Mbalmayo (Semi-Urban)
14419.ERR3618970	Homo sapien	Mbalmayo (Semi-Urban)
14419.ERR3618977	Homo sapien	Mbalmayo (Semi-Urban)
14419.ERR3618978	Homo sapien	Mbalmayo (Semi-Urban)
14419.ERR3618979	Homo sapien	Mbalmayo (Semi-Urban)
14419.ERR3618991	Homo sapien	Mbalmayo (Semi-Urban)
14419.ERR3618993	Homo sapien	Mbalmayo (Semi-Urban)
14419.ERR3618994	Homo sapien	Mbalmayo (Semi-Urban)
14419.ERR3618996	Homo sapien	Mbalmayo (Semi-Urban)
14419.ERR3618886	Homo sapien	Mbalmayo (Semi-Urban)
14419.ERR3618887	Homo sapien	Mbalmayo (Semi-Urban)
14419.ERR3618900	Homo sapien	Mbalmayo (Semi-Urban)
14419.ERR3618955	Homo sapien	Mbalmayo (Semi-Urban)
14419.ERR3618960	Homo sapien	Mbalmayo (Semi-Urban)
14419.ERR3618963	Homo sapien	Mbalmayo (Semi-Urban)
14419.ERR3618964	Homo sapien	Mbalmayo (Semi-Urban)
14419.ERR3618971	Homo sapien	Mbalmayo (Semi-Urban)
14419.ERR3618973	Homo sapien	Mbalmayo (Semi-Urban)
14419.ERR3618975	Homo sapien	Mbalmayo (Semi-Urban)
14419.ERR3618988	Homo sapien	Mbalmayo (Semi-Urban)
14419.ERR3618989	Homo sapien	Mbalmayo (Semi-Urban)
14419.ERR3618992	Homo sapien	Mbalmayo (Semi-Urban)
14419.ERR3618995	Homo sapien	Mbalmayo (Semi-Urban)
14419.ERR3618997	Homo sapien	Mbalmayo (Semi-Urban)
14419.ERR3618860	Homo sapien	Ngoantet (Rural)
14419.ERR3618865	Homo sapien	Ngoantet (Rural)
14419.ERR3618867	Homo sapien	Ngoantet (Rural)
14419.ERR3618868	Homo sapien	Ngoantet (Rural)
14419.ERR3618869	Homo sapien	Ngoantet (Rural)
14419.ERR3618878	Homo sapien	Ngoantet (Rural)
14419.ERR3618879	Homo sapien	Ngoantet (Rural)
14419.ERR3618881	Homo sapien	Ngoantet (Rural)
14419.ERR3618882	Homo sapien	Ngoantet (Rural)
14419.ERR3618888	Homo sapien	Ngoantet (Rural)
14419.ERR3618895	Homo sapien	Ngoantet (Rural)
14419.ERR3618905	Homo sapien	Ngoantet (Rural)
14419.ERR3618907	Homo sapien	Ngoantet (Rural)
14419.ERR3618909	Homo sapien	Ngoantet (Rural)
14419.ERR3618911	Homo sapien	Ngoantet (Rural)
14419.ERR3618913	Homo sapien	Ngoantet (Rural)
14419.ERR3618914	Homo sapien	Ngoantet (Rural)
14419.ERR3618915	Homo sapien	Ngoantet (Rural)
14419.ERR3618919	Homo sapien	Ngoantet (Rural)
14419.ERR3618920	Homo sapien	Ngoantet (Rural)
14419.ERR3618924	Homo sapien	Ngoantet (Rural)
14419.ERR3618925	Homo sapien	Ngoantet (Rural)
14419.ERR3618931	Homo sapien	Ngoantet (Rural)
14419.ERR3618936	Homo sapien	Ngoantet (Rural)
14419.ERR3618937	Homo sapien	Ngoantet (Rural)
14419.ERR3618939	Homo sapien	Ngoantet (Rural)
14419.ERR3618951	Homo sapien	Ngoantet (Rural)
14419.ERR3618952	Homo sapien	Ngoantet (Rural)
14419.ERR3618953	Homo sapien	Ngoantet (Rural)
14419.ERR3618965	Homo sapien	Ngoantet (Rural)
14419.ERR3618966	Homo sapien	Ngoantet (Rural)
14419.ERR3618967	Homo sapien	Ngoantet (Rural)
14419.ERR3618968	Homo sapien	Ngoantet (Rural)
14419.ERR3618974	Homo sapien	Ngoantet (Rural)
14419.ERR3618980	Homo sapien	Ngoantet (Rural)
14419.ERR3618981	Homo sapien	Ngoantet (Rural)
14419.ERR3618982	Homo sapien	Ngoantet (Rural)
14419.ERR3618983	Homo sapien	Ngoantet (Rural)
14419.ERR3618985	Homo sapien	Ngoantet (Rural)
14419.ERR3618986	Homo sapien	Ngoantet (Rural)
14419.ERR3618987	Homo sapien	Ngoantet (Rural)
14419.ERR3618990	Homo sapien	Ngoantet (Rural)
14419.ERR3618854	Homo sapien	Ngoantet (Rural)
14419.ERR3618859	Homo sapien	Ngoantet (Rural)
14419.ERR3618861	Homo sapien	Ngoantet (Rural)
14419.ERR3618863	Homo sapien	Ngoantet (Rural)
14419.ERR3618864	Homo sapien	Ngoantet (Rural)
14419.ERR3618871	Homo sapien	Ngoantet (Rural)
14419.ERR3618874	Homo sapien	Ngoantet (Rural)
14419.ERR3618876	Homo sapien	Ngoantet (Rural)
14419.ERR3618877	Homo sapien	Ngoantet (Rural)
14419.ERR3618880	Homo sapien	Ngoantet (Rural)
14419.ERR3618883	Homo sapien	Ngoantet (Rural)
14419.ERR3618884	Homo sapien	Ngoantet (Rural)
14419.ERR3618885	Homo sapien	Ngoantet (Rural)
14419.ERR3618889	Homo sapien	Ngoantet (Rural)
14419.ERR3618890	Homo sapien	Ngoantet (Rural)
14419.ERR3618893	Homo sapien	Ngoantet (Rural)
14419.ERR3618896	Homo sapien	Ngoantet (Rural)
14419.ERR3618899	Homo sapien	Ngoantet (Rural)
14419.ERR3618901	Homo sapien	Ngoantet (Rural)
14419.ERR3618903	Homo sapien	Ngoantet (Rural)
14419.ERR3618906	Homo sapien	Ngoantet (Rural)
14419.ERR3618910	Homo sapien	Ngoantet (Rural)
14419.ERR3618929	Homo sapien	Ngoantet (Rural)
14419.ERR3618930	Homo sapien	Ngoantet (Rural)
14419.ERR3618932	Homo sapien	Ngoantet (Rural)
14419.ERR3618935	Homo sapien	Ngoantet (Rural)
14419.ERR3618941	Homo sapien	Ngoantet (Rural)
14419.ERR3618943	Homo sapien	Ngoantet (Rural)
14419.ERR3618944	Homo sapien	Ngoantet (Rural)
14419.ERR3618947	Homo sapien	Ngoantet (Rural)
14419.ERR3618950	Homo sapien	Ngoantet (Rural)
14419.ERR3618957	Homo sapien	Ngoantet (Rural)
14419.ERR3618958	Homo sapien	Ngoantet (Rural)
14419.ERR3618962	Homo sapien	Ngoantet (Rural)
14419.ERR3618969	Homo sapien	Ngoantet (Rural)
14419.ERR3618976	Homo sapien	Ngoantet (Rural)
14419.ERR3618984	Homo sapien	Ngoantet (Rural)
14420.ERR2182702	Homo sapien	Tibet (Urban)
14420.ERR2182703	Homo sapien	Tibet (Urban)
14420.ERR2182704	Homo sapien	Tibet (Urban)
14420.ERR2182705	Homo sapien	Tibet (Urban)
14420.ERR2182706	Homo sapien	Tibet (Urban)
14420.ERR2182707	Homo sapien	Tibet (Urban)
14420.ERR2182708	Homo sapien	Tibet (Urban)
14420.ERR2182709	Homo sapien	Tibet (Urban)
14420.ERR2182694	Homo sapien	Tibet (Semi-Urban)
14420.ERR2182695	Homo sapien	Tibet (Semi-Urban)
14420.ERR2182696	Homo sapien	Tibet (Semi-Urban)
14420.ERR2182697	Homo sapien	Tibet (Semi-Urban)
14420.ERR2182698	Homo sapien	Tibet (Semi-Urban)
14420.ERR2182699	Homo sapien	Tibet (Semi-Urban)
14420.ERR2182700	Homo sapien	Tibet (Semi-Urban)
14420.ERR2182701	Homo sapien	Tibet (Semi-Urban)
14420.ERR2182686	Homo sapien	Tibet (Rural)
14420.ERR2182687	Homo sapien	Tibet (Rural)
14420.ERR2182688	Homo sapien	Tibet (Rural)
14420.ERR2182689	Homo sapien	Tibet (Rural)
14420.ERR2182690	Homo sapien	Tibet (Rural)
14420.ERR2182691	Homo sapien	Tibet (Rural)
14420.ERR2182692	Homo sapien	Tibet (Rural)
14420.ERR2182693	Homo sapien	Tibet (Rural)
850.F3T1pre4	Homo sapien	USA (Urban)
850.F3T2pre4	Homo sapien	USA (Urban)
850.F4T1pre4	Homo sapien	USA (Urban)
850.F4T2pre4	Homo sapien	USA (Urban)
850.TS1	Homo sapien	USA (Urban)
850.TS109	Homo sapien	USA (Urban)
850.TS110	Homo sapien	USA (Urban)
850.TS111	Homo sapien	USA (Urban)
850.TS127	Homo sapien	USA (Urban)
850.TS128	Homo sapien	USA (Urban)
850.TS129	Homo sapien	USA (Urban)
850.TS13	Homo sapien	USA (Urban)
850.TS14	Homo sapien	USA (Urban)
850.TS15	Homo sapien	USA (Urban)
850.TS163	Homo sapien	USA (Urban)
850.TS164	Homo sapien	USA (Urban)
850.TS165	Homo sapien	USA (Urban)
850.TS184	Homo sapien	USA (Urban)
850.TS185	Homo sapien	USA (Urban)
850.TS186	Homo sapien	USA (Urban)
850.TS193	Homo sapien	USA (Urban)
850.TS194	Homo sapien	USA (Urban)
850.TS195	Homo sapien	USA (Urban)
850.TS2	Homo sapien	USA (Urban)
850.TS25	Homo sapien	USA (Urban)
850.TS26	Homo sapien	USA (Urban)
850.TS27	Homo sapien	USA (Urban)
850.TS3	Homo sapien	USA (Urban)
850.TS4	Homo sapien	USA (Urban)
850.TS5	Homo sapien	USA (Urban)
850.TS6	Homo sapien	USA (Urban)
850.TS7	Homo sapien	USA (Urban)
850.TS8	Homo sapien	USA (Urban)
850.TS9	Homo sapien	USA (Urban)
850.USBldAdlt6	Homo sapien	USA (Urban)
850.USchp18Mom	Homo sapien	USA (Urban)
850.USchp1Mom	Homo sapien	USA (Urban)
850.USchp25Mom	Homo sapien	USA (Urban)
850.USchp33Mom	Homo sapien	USA (Urban)
850.USchp35Mom	Homo sapien	USA (Urban)
850.USchp36Mom	Homo sapien	USA (Urban)
850.USchp3Mom	Homo sapien	USA (Urban)
850.USchp41Mom	Homo sapien	USA (Urban)
850.USchp4Mom	Homo sapien	USA (Urban)
850.USchp60Mom	Homo sapien	USA (Urban)
850.USygt1.F	Homo sapien	USA (Urban)
850.USygt1.M	Homo sapien	USA (Urban)
850.USygt1.T1	Homo sapien	USA (Urban)
850.USygt1.T2	Homo sapien	USA (Urban)
850.USygt10.M	Homo sapien	USA (Urban)
850.USygt10.T1	Homo sapien	USA (Urban)
850.USygt10.T2	Homo sapien	USA (Urban)
850.USygt11.F	Homo sapien	USA (Urban)
850.USygt11.M	Homo sapien	USA (Urban)
850.USygt12.F	Homo sapien	USA (Urban)
850.USygt12.M	Homo sapien	USA (Urban)
850.USygt13.F	Homo sapien	USA (Urban)
850.USygt13.M	Homo sapien	USA (Urban)
850.USygt13.T1	Homo sapien	USA (Urban)
850.USygt13.T2	Homo sapien	USA (Urban)
850.USygt14.F	Homo sapien	USA (Urban)
850.USygt14.M	Homo sapien	USA (Urban)
850.USygt14.T1	Homo sapien	USA (Urban)
850.USygt14.T2	Homo sapien	USA (Urban)
850.USygt15.F	Homo sapien	USA (Urban)
850.USygt15.M	Homo sapien	USA (Urban)
850.USygt15.T1	Homo sapien	USA (Urban)
850.USygt15.T2	Homo sapien	USA (Urban)
850.USygt16.F	Homo sapien	USA (Urban)
850.USygt16.M	Homo sapien	USA (Urban)
850.USygt17.M	Homo sapien	USA (Urban)
850.USygt17.T1	Homo sapien	USA (Urban)
850.USygt17.T2	Homo sapien	USA (Urban)
850.USygt18.M	Homo sapien	USA (Urban)
850.USygt18.T1	Homo sapien	USA (Urban)
850.USygt18.T2	Homo sapien	USA (Urban)
850.USygt19.M	Homo sapien	USA (Urban)
850.USygt19.T1	Homo sapien	USA (Urban)
850.USygt19.T2	Homo sapien	USA (Urban)
850.USygt2.M	Homo sapien	USA (Urban)
850.USygt20.F	Homo sapien	USA (Urban)
850.USygt20.M	Homo sapien	USA (Urban)
850.USygt20.T1	Homo sapien	USA (Urban)
850.USygt20.T2	Homo sapien	USA (Urban)
850.USygt21.F	Homo sapien	USA (Urban)
850.USygt21.M	Homo sapien	USA (Urban)
850.USygt21.T1	Homo sapien	USA (Urban)
850.USygt21.T2	Homo sapien	USA (Urban)
850.USygt22.F	Homo sapien	USA (Urban)
850.USygt22.M	Homo sapien	USA (Urban)
850.USygt22.T1	Homo sapien	USA (Urban)
850.USygt22.T2	Homo sapien	USA (Urban)
850.USygt23.F	Homo sapien	USA (Urban)
850.USygt23.M	Homo sapien	USA (Urban)
850.USygt23.T1	Homo sapien	USA (Urban)
850.USygt23.T2	Homo sapien	USA (Urban)
850.USygt24.M	Homo sapien	USA (Urban)
850.USygt24.T1	Homo sapien	USA (Urban)
850.USygt24.T2	Homo sapien	USA (Urban)
850.USygt25.F	Homo sapien	USA (Urban)
850.USygt25.M	Homo sapien	USA (Urban)
850.USygt25.T1	Homo sapien	USA (Urban)
850.USygt25.T2	Homo sapien	USA (Urban)
850.USygt26.M	Homo sapien	USA (Urban)
850.USygt26.T1	Homo sapien	USA (Urban)
850.USygt26.T2	Homo sapien	USA (Urban)
850.USygt27.F	Homo sapien	USA (Urban)
850.USygt27.M	Homo sapien	USA (Urban)
850.USygt28.M	Homo sapien	USA (Urban)
850.USygt28.T1	Homo sapien	USA (Urban)
850.USygt28.T2	Homo sapien	USA (Urban)
850.USygt29.M	Homo sapien	USA (Urban)
850.USygt29.T1	Homo sapien	USA (Urban)
850.USygt29.T2	Homo sapien	USA (Urban)
850.USygt3.M	Homo sapien	USA (Urban)
850.USygt3.T1	Homo sapien	USA (Urban)
850.USygt3.T2	Homo sapien	USA (Urban)
850.USygt30.F	Homo sapien	USA (Urban)
850.USygt30.M	Homo sapien	USA (Urban)
850.USygt30.T1	Homo sapien	USA (Urban)
850.USygt30.T2	Homo sapien	USA (Urban)
850.USygt31.M	Homo sapien	USA (Urban)
850.USygt31.T1	Homo sapien	USA (Urban)
850.USygt31.T2	Homo sapien	USA (Urban)
850.USygt32.M	Homo sapien	USA (Urban)
850.USygt32.T1	Homo sapien	USA (Urban)
850.USygt32.T2	Homo sapien	USA (Urban)
850.USygt33.M	Homo sapien	USA (Urban)
850.USygt33.T1	Homo sapien	USA (Urban)
850.USygt33.T2	Homo sapien	USA (Urban)
850.USygt34.F	Homo sapien	USA (Urban)
850.USygt34.M	Homo sapien	USA (Urban)
850.USygt34.T1	Homo sapien	USA (Urban)
850.USygt35.M	Homo sapien	USA (Urban)
850.USygt35.T1	Homo sapien	USA (Urban)
850.USygt35.T2	Homo sapien	USA (Urban)
850.USygt36.M	Homo sapien	USA (Urban)
850.USygt37.F	Homo sapien	USA (Urban)
850.USygt37.M	Homo sapien	USA (Urban)
850.USygt37.T1	Homo sapien	USA (Urban)
850.USygt37.T2	Homo sapien	USA (Urban)
850.USygt38.F	Homo sapien	USA (Urban)
850.USygt38.M	Homo sapien	USA (Urban)
850.USygt38.T1	Homo sapien	USA (Urban)
850.USygt38.T2	Homo sapien	USA (Urban)
850.USygt39.F	Homo sapien	USA (Urban)
850.USygt39.M	Homo sapien	USA (Urban)
850.USygt39.T1	Homo sapien	USA (Urban)
850.USygt39.T2	Homo sapien	USA (Urban)
850.USygt4.F	Homo sapien	USA (Urban)
850.USygt4.M	Homo sapien	USA (Urban)
850.USygt4.T1	Homo sapien	USA (Urban)
850.USygt4.T2	Homo sapien	USA (Urban)
850.USygt40.F	Homo sapien	USA (Urban)
850.USygt40.M	Homo sapien	USA (Urban)
850.USygt40.T1	Homo sapien	USA (Urban)
850.USygt40.T2	Homo sapien	USA (Urban)
850.USygt41.F	Homo sapien	USA (Urban)
850.USygt41.M	Homo sapien	USA (Urban)
850.USygt41.T1	Homo sapien	USA (Urban)
850.USygt41.T2	Homo sapien	USA (Urban)
850.USygt42.F	Homo sapien	USA (Urban)
850.USygt42.M	Homo sapien	USA (Urban)
850.USygt42.T1	Homo sapien	USA (Urban)
850.USygt42.T2	Homo sapien	USA (Urban)
850.USygt43.F	Homo sapien	USA (Urban)
850.USygt43.M	Homo sapien	USA (Urban)
850.USygt43.T1	Homo sapien	USA (Urban)
850.USygt43.T2	Homo sapien	USA (Urban)
850.USygt44.F	Homo sapien	USA (Urban)
850.USygt44.M	Homo sapien	USA (Urban)
850.USygt44.T1	Homo sapien	USA (Urban)
850.USygt44.T2	Homo sapien	USA (Urban)
850.USygt45.F	Homo sapien	USA (Urban)
850.USygt45.M	Homo sapien	USA (Urban)
850.USygt45.T1	Homo sapien	USA (Urban)
850.USygt45.T2	Homo sapien	USA (Urban)
850.USygt46.F	Homo sapien	USA (Urban)
850.USygt46.M	Homo sapien	USA (Urban)
850.USygt46.T1	Homo sapien	USA (Urban)
850.USygt46.T2	Homo sapien	USA (Urban)
850.USygt47.F	Homo sapien	USA (Urban)
850.USygt47.M	Homo sapien	USA (Urban)
850.USygt47.T1	Homo sapien	USA (Urban)
850.USygt47.T2	Homo sapien	USA (Urban)
850.USygt48.F	Homo sapien	USA (Urban)
850.USygt48.M	Homo sapien	USA (Urban)
850.USygt48.T1	Homo sapien	USA (Urban)
850.USygt48.T2	Homo sapien	USA (Urban)
850.USygt49.F	Homo sapien	USA (Urban)
850.USygt49.M	Homo sapien	USA (Urban)
850.USygt49.T1	Homo sapien	USA (Urban)
850.USygt49.T2	Homo sapien	USA (Urban)
850.USygt5.F	Homo sapien	USA (Urban)
850.USygt5.M	Homo sapien	USA (Urban)
850.USygt5.T1	Homo sapien	USA (Urban)
850.USygt5.T2	Homo sapien	USA (Urban)
850.USygt50.F	Homo sapien	USA (Urban)
850.USygt50.M	Homo sapien	USA (Urban)
850.USygt50.T1	Homo sapien	USA (Urban)
850.USygt50.T2	Homo sapien	USA (Urban)
850.USygt51.F	Homo sapien	USA (Urban)
850.USygt51.M	Homo sapien	USA (Urban)
850.USygt51.T1	Homo sapien	USA (Urban)
850.USygt51.T2	Homo sapien	USA (Urban)
850.USygt52.F	Homo sapien	USA (Urban)
850.USygt52.M	Homo sapien	USA (Urban)
850.USygt52.T1	Homo sapien	USA (Urban)
850.USygt52.T2	Homo sapien	USA (Urban)
850.USygt53.F	Homo sapien	USA (Urban)
850.USygt53.M	Homo sapien	USA (Urban)
850.USygt53.T1	Homo sapien	USA (Urban)
850.USygt53.T2	Homo sapien	USA (Urban)
850.USygt54.F	Homo sapien	USA (Urban)
850.USygt54.M	Homo sapien	USA (Urban)
850.USygt54.T1	Homo sapien	USA (Urban)
850.USygt54.T2	Homo sapien	USA (Urban)
850.USygt6.M	Homo sapien	USA (Urban)
850.USygt6.T2	Homo sapien	USA (Urban)
850.USygt7.M	Homo sapien	USA (Urban)
850.USygt8.F	Homo sapien	USA (Urban)
850.USygt8.M	Homo sapien	USA (Urban)
850.USygt8.T1	Homo sapien	USA (Urban)
850.USygt8.T2	Homo sapien	USA (Urban)
850.USygt9.F	Homo sapien	USA (Urban)
850.USygt9.M	Homo sapien	USA (Urban)
850.USygt9.T1	Homo sapien	USA (Urban)
850.USygt9.T2	Homo sapien	USA (Urban)
850.h101M.1	Homo sapien	Malawi (Rural)
850.h101S.1	Homo sapien	Malawi (Rural)
850.h10M.1	Homo sapien	Malawi (Rural)
850.h121S.1	Homo sapien	Malawi (Rural)
850.h122M.1	Homo sapien	Malawi (Rural)
850.h122S.1	Homo sapien	Malawi (Rural)
850.h128M.1	Homo sapien	Malawi (Rural)
850.h128S.1	Homo sapien	Malawi (Rural)
850.h130M.1	Homo sapien	Malawi (Rural)
850.h130S.1	Homo sapien	Malawi (Rural)
850.h144M.1	Homo sapien	Malawi (Rural)
850.h146M.1	Homo sapien	Malawi (Rural)
850.h147M.1	Homo sapien	Malawi (Rural)
850.h165M.1	Homo sapien	Malawi (Rural)
850.h165S.1	Homo sapien	Malawi (Rural)
850.h181M.1	Homo sapien	Malawi (Rural)
850.h181S.1	Homo sapien	Malawi (Rural)
850.h186M.1	Homo sapien	Malawi (Rural)
850.h186S.1	Homo sapien	Malawi (Rural)
850.h208M.1	Homo sapien	Malawi (Rural)
850.h209M.1	Homo sapien	Malawi (Rural)
850.h209S.1	Homo sapien	Malawi (Rural)
850.h228M.1	Homo sapien	Malawi (Rural)
850.h228S.1	Homo sapien	Malawi (Rural)
850.h235M.1	Homo sapien	Malawi (Rural)
850.h257M.1	Homo sapien	Malawi (Rural)
850.h257S.1	Homo sapien	Malawi (Rural)
850.h259M.1	Homo sapien	Malawi (Rural)
850.h259S.1	Homo sapien	Malawi (Rural)
850.h264M.1	Homo sapien	Malawi (Rural)
850.h273M.1	Homo sapien	Malawi (Rural)
850.h279M.1	Homo sapien	Malawi (Rural)
850.h279S.1	Homo sapien	Malawi (Rural)
850.h301M.1	Homo sapien	Malawi (Rural)
850.h305M.1	Homo sapien	Malawi (Rural)
850.h35S.1	Homo sapien	Malawi (Rural)
850.h37M.1	Homo sapien	Malawi (Rural)
850.h37S.1	Homo sapien	Malawi (Rural)
850.h47M.1	Homo sapien	Malawi (Rural)
850.h47S.1	Homo sapien	Malawi (Rural)
850.h60M.1	Homo sapien	Malawi (Rural)
850.h60S.1	Homo sapien	Malawi (Rural)
850.h68M.1	Homo sapien	Malawi (Rural)
850.h78M.1	Homo sapien	Malawi (Rural)
850.h78S.1	Homo sapien	Malawi (Rural)
850.h85M.1	Homo sapien	Malawi (Rural)
850.h85S.1	Homo sapien	Malawi (Rural)
850.h95M.1	Homo sapien	Malawi (Rural)
850.h95S.1	Homo sapien	Malawi (Rural)
850.h9M.1	Homo sapien	Malawi (Rural)
850.h9S.1	Homo sapien	Malawi (Rural)
850.k278A.2	Homo sapien	Malawi (Rural)
850.k278B.2	Homo sapien	Malawi (Rural)
850.k278M.1	Homo sapien	Malawi (Rural)
13332.AF018.MR.KR	krugi	Maricao (Rural) (non-cristatellus)
13332.AF025.MR.KR	krugi	Maricao (Rural) (non-cristatellus)
13332.AF029.MR.KR	krugi	Maricao (Rural) (non-cristatellus)
13332.AF035.MR.KR	krugi	Maricao (Rural) (non-cristatellus)
13332.AF049.MR.KR	krugi	Maricao (Rural) (non-cristatellus)
13332.AF052.MR.KR	krugi	Maricao (Rural) (non-cristatellus)
13332.AF056.MR.KR	krugi	Maricao (Rural) (non-cristatellus)
13332.AF060.MR.KR	krugi	Maricao (Rural) (non-cristatellus)
13332.AF063.MR.KR	krugi	Maricao (Rural) (non-cristatellus)
13332.AF070.MR.KR	krugi	Maricao (Rural) (non-cristatellus)
13332.AF009.MR.ST	stratulus	Maricao (Rural) (non-cristatellus)
13332.AF015.MR.ST	stratulus	Maricao (Rural) (non-cristatellus)
13332.AF019.MR.ST	stratulus	Maricao (Rural) (non-cristatellus)
13332.AF022.MR.ST	stratulus	Maricao (Rural) (non-cristatellus)
13332.AF030.MR.ST	stratulus	Maricao (Rural) (non-cristatellus)
13332.AF031.MR.ST	stratulus	Maricao (Rural) (non-cristatellus)
13332.AF032.MR.ST	stratulus	Maricao (Rural) (non-cristatellus)
13332.AF036.MR.ST	stratulus	Maricao (Rural) (non-cristatellus)
13332.AF038.MR.ST	stratulus	Maricao (Rural) (non-cristatellus)
13332.AF041.MR.ST	stratulus	Maricao (Rural) (non-cristatellus)
13332.AF043.MR.ST	stratulus	Maricao (Rural) (non-cristatellus)
13332.AF057.MR.ST	stratulus	Maricao (Rural) (non-cristatellus)
13332.AF059.MR.ST	stratulus	Maricao (Rural) (non-cristatellus)
13332.AF069.MR.ST	stratulus	Maricao (Rural) (non-cristatellus)
14425.SRR11825485	Zonotrichia leucophrys	Sparrow (Urban)
14425.SRR11825496	Zonotrichia leucophrys	Sparrow (Urban)
14425.SRR11825507	Zonotrichia leucophrys	Sparrow (Urban)
14425.SRR11825512	Zonotrichia leucophrys	Sparrow (Urban)
14425.SRR11825516	Zonotrichia leucophrys	Sparrow (Urban)
14425.SRR11825517	Zonotrichia leucophrys	Sparrow (Urban)
14425.SRR11825518	Zonotrichia leucophrys	Sparrow (Urban)
14425.SRR11825519	Zonotrichia leucophrys	Sparrow (Urban)
14425.SRR11825520	Zonotrichia leucophrys	Sparrow (Urban)
14425.SRR11825522	Zonotrichia leucophrys	Sparrow (Urban)
14425.SRR11825523	Zonotrichia leucophrys	Sparrow (Urban)
14425.SRR11825524	Zonotrichia leucophrys	Sparrow (Urban)
14425.SRR11825525	Zonotrichia leucophrys	Sparrow (Urban)
14425.SRR11825526	Zonotrichia leucophrys	Sparrow (Urban)
14425.SRR11825527	Zonotrichia leucophrys	Sparrow (Urban)
14425.SRR11825528	Zonotrichia leucophrys	Sparrow (Urban)
14425.SRR11825529	Zonotrichia leucophrys	Sparrow (Urban)
14425.SRR11825530	Zonotrichia leucophrys	Sparrow (Urban)
14425.SRR11825532	Zonotrichia leucophrys	Sparrow (Urban)
14425.SRR11825533	Zonotrichia leucophrys	Sparrow (Urban)
14425.SRR11825534	Zonotrichia leucophrys	Sparrow (Urban)
14425.SRR11825535	Zonotrichia leucophrys	Sparrow (Urban)
14425.SRR11825536	Zonotrichia leucophrys	Sparrow (Urban)
14425.SRR11825537	Zonotrichia leucophrys	Sparrow (Urban)
14425.SRR11825538	Zonotrichia leucophrys	Sparrow (Urban)
14425.SRR11825539	Zonotrichia leucophrys	Sparrow (Urban)
14425.SRR11825540	Zonotrichia leucophrys	Sparrow (Urban)
14425.SRR11825543	Zonotrichia leucophrys	Sparrow (Urban)
14425.SRR11825544	Zonotrichia leucophrys	Sparrow (Urban)
14425.SRR11825545	Zonotrichia leucophrys	Sparrow (Urban)
14425.SRR11825546	Zonotrichia leucophrys	Sparrow (Urban)
14425.SRR11825547	Zonotrichia leucophrys	Sparrow (Urban)
14425.SRR11825548	Zonotrichia leucophrys	Sparrow (Urban)
14425.SRR11825549	Zonotrichia leucophrys	Sparrow (Urban)
14425.SRR11825550	Zonotrichia leucophrys	Sparrow (Urban)
14425.SRR11825551	Zonotrichia leucophrys	Sparrow (Urban)
14425.SRR11825552	Zonotrichia leucophrys	Sparrow (Urban)
14425.SRR11825553	Zonotrichia leucophrys	Sparrow (Urban)
14425.SRR11825554	Zonotrichia leucophrys	Sparrow (Urban)
14425.SRR11825555	Zonotrichia leucophrys	Sparrow (Urban)
14425.SRR11825556	Zonotrichia leucophrys	Sparrow (Urban)
14425.SRR11825557	Zonotrichia leucophrys	Sparrow (Urban)
14425.SRR11825558	Zonotrichia leucophrys	Sparrow (Urban)
14425.SRR11825559	Zonotrichia leucophrys	Sparrow (Urban)
14425.SRR11825561	Zonotrichia leucophrys	Sparrow (Urban)
14425.SRR11825562	Zonotrichia leucophrys	Sparrow (Urban)
14425.SRR11825563	Zonotrichia leucophrys	Sparrow (Urban)
14425.SRR11825564	Zonotrichia leucophrys	Sparrow (Urban)
14425.SRR11825565	Zonotrichia leucophrys	Sparrow (Urban)
14425.SRR11825566	Zonotrichia leucophrys	Sparrow (Urban)
14425.SRR11825567	Zonotrichia leucophrys	Sparrow (Urban)
14425.SRR11825568	Zonotrichia leucophrys	Sparrow (Urban)
14425.SRR11825569	Zonotrichia leucophrys	Sparrow (Urban)
14425.SRR11825570	Zonotrichia leucophrys	Sparrow (Urban)
14425.SRR11825571	Zonotrichia leucophrys	Sparrow (Urban)
14425.SRR11825572	Zonotrichia leucophrys	Sparrow (Urban)
14425.SRR11825573	Zonotrichia leucophrys	Sparrow (Urban)
14425.SRR11825574	Zonotrichia leucophrys	Sparrow (Urban)
14425.SRR11825482	Zonotrichia leucophrys	Sparrow (Rural)
14425.SRR11825483	Zonotrichia leucophrys	Sparrow (Rural)
14425.SRR11825484	Zonotrichia leucophrys	Sparrow (Rural)
14425.SRR11825487	Zonotrichia leucophrys	Sparrow (Rural)
14425.SRR11825488	Zonotrichia leucophrys	Sparrow (Rural)
14425.SRR11825489	Zonotrichia leucophrys	Sparrow (Rural)
14425.SRR11825490	Zonotrichia leucophrys	Sparrow (Rural)
14425.SRR11825491	Zonotrichia leucophrys	Sparrow (Rural)
14425.SRR11825492	Zonotrichia leucophrys	Sparrow (Rural)
14425.SRR11825493	Zonotrichia leucophrys	Sparrow (Rural)
14425.SRR11825494	Zonotrichia leucophrys	Sparrow (Rural)
14425.SRR11825495	Zonotrichia leucophrys	Sparrow (Rural)
14425.SRR11825497	Zonotrichia leucophrys	Sparrow (Rural)
14425.SRR11825498	Zonotrichia leucophrys	Sparrow (Rural)
14425.SRR11825499	Zonotrichia leucophrys	Sparrow (Rural)
14425.SRR11825500	Zonotrichia leucophrys	Sparrow (Rural)
14425.SRR11825502	Zonotrichia leucophrys	Sparrow (Rural)
14425.SRR11825503	Zonotrichia leucophrys	Sparrow (Rural)
14425.SRR11825505	Zonotrichia leucophrys	Sparrow (Rural)
14425.SRR11825506	Zonotrichia leucophrys	Sparrow (Rural)
14425.SRR11825508	Zonotrichia leucophrys	Sparrow (Rural)
14425.SRR11825509	Zonotrichia leucophrys	Sparrow (Rural)
14425.SRR11825511	Zonotrichia leucophrys	Sparrow (Rural)
14425.SRR11825513	Zonotrichia leucophrys	Sparrow (Rural)
14425.SRR11825514	Zonotrichia leucophrys	Sparrow (Rural)
14425.SRR11825515	Zonotrichia leucophrys	Sparrow (Rural)
14425.SRR11825541	Zonotrichia leucophrys	Sparrow (Rural)
14425.SRR11825542	Zonotrichia leucophrys	Sparrow (Rural)
