# Supplementary material for: Humanization of wildlife gut microbiota in urban environments
Source: eLife. 2022 May 31;11:e76381. doi: 10.7554/eLife.76381 (PMC9203057; doi:10.7554/eLife.76381)
Supplement: Supplementary file 3. [file elife-76381-supp3.xlsx]

## Sheet: Sheet1
Table S3. Taxonomic assignments of all ASVs.
Feature ID	Taxon	Confidence
TACCAGCACCCCGAGTGGTCGGGACGATTATTGGGCCTAAAGCATCCGTAGCCGGTTCCTTAAGTCCTCCGTTAAATCCACCTGCTTAACAGATGGGCTG	d__Archaea; p__Crenarchaeota; c__Nitrososphaeria; o__Nitrososphaerales; f__Nitrososphaeraceae	0.994387
TACCAGCACCCCGAGTGGTCGGGACGATTATTGGGCCTAAAGCATCCGTAGCCGGTTCTACAAGTCTTCCGTTAAATCCACCTGCTTAACAGATGGGCTG	d__Archaea; p__Crenarchaeota; c__Nitrososphaeria; o__Nitrososphaerales; f__Nitrososphaeraceae	0.988896
TACCAGCACCCCGAGTGGTCGGGACGATTATTGGGCCTAAAGCATCCGTAGCCGGTTCTACAAGTCTTCCGTTAAATCCACCTGCTTAACAGTTGGGCTG	d__Archaea; p__Crenarchaeota; c__Nitrososphaeria; o__Nitrososphaerales; f__Nitrososphaeraceae	0.87439
TACCAGCACCCCGAGTGGTCGGGACGTTTATTGGGCCTAAAGCATCCGTAGCCGGTTCTGCAAGTCTTCCGTTAAATCCACCTGCTTAACAGATGGGCCG	d__Archaea; p__Crenarchaeota; c__Nitrososphaeria; o__Nitrososphaerales; f__Nitrososphaeraceae	0.997488
ACCAGCACCCCGAGTGGTCGGGACGTTTATTGGGCCTAAAGCATCCGTAGCCGGTTCTGCAAGTCTTCCGTTAAATCCACCTGCTTAACAGATGGGCTGC	d__Archaea; p__Crenarchaeota; c__Nitrososphaeria; o__Nitrososphaerales; f__Nitrososphaeraceae; g__Candidatus_Nitrocosmicus	0.716546
ATACCAGCACCCCGAGTGGTCGGGACGTTTATTGGGCCTAAAGCATCCGTAGCCGGTTCTACAAGTCTTCCGTTAAATCCACCTGCTTAACGGATGGGCT	d__Archaea; p__Crenarchaeota; c__Nitrososphaeria; o__Nitrososphaerales; f__Nitrososphaeraceae; g__Candidatus_Nitrocosmicus	0.831757
CAGCCCCCCGAGTGGTCGGGACGTTTATTGGGCCTAAAGCATCCGTAGCCGGTTCTACAAGTCTTCCGTTAAATCCACCTGCTTAACAGATGGGCTGCGG	d__Archaea; p__Crenarchaeota; c__Nitrososphaeria; o__Nitrososphaerales; f__Nitrososphaeraceae; g__Candidatus_Nitrocosmicus	0.796289
CCAGCACCCCGAGTGGTCGGGACGTTTATTGGGCCTAAAGCATCCGTAGCCGGTTCTACAAGTCTTCCGTTAAATCCACCTGCTTAACAGATGGGCTGCG	d__Archaea; p__Crenarchaeota; c__Nitrososphaeria; o__Nitrososphaerales; f__Nitrososphaeraceae; g__Candidatus_Nitrocosmicus	0.857005
TACCAGCACCCCGAGTGGTCGGGACGATTATTGGGCCTAAAGCATCCGTAGCCGGTTCTACAAGTCTTCCGTTAAATCCATCTGCTTAACAGATGGGCTG	d__Archaea; p__Crenarchaeota; c__Nitrososphaeria; o__Nitrososphaerales; f__Nitrososphaeraceae; g__Candidatus_Nitrocosmicus	0.794004
TACCAGCACCCCGAGTGGTCGGGACGTTTATTGGGCCTAAAGCATCCGTAGCCGGTTCTACAAGTCTTCCGTTAAATCCACCTGCTTAACAGATGGGCTG	d__Archaea; p__Crenarchaeota; c__Nitrososphaeria; o__Nitrososphaerales; f__Nitrososphaeraceae; g__Candidatus_Nitrocosmicus	0.841418
TACCAGCACCCCGAGTGGTCGGGACGTTTATTGGGCCTAAAGCATCCGTAGCCGGTTCTACAAGTCTTCCGTTAAATCCACCTGCTTAACAGATGGGTTG	d__Archaea; p__Crenarchaeota; c__Nitrososphaeria; o__Nitrososphaerales; f__Nitrososphaeraceae; g__Candidatus_Nitrocosmicus	0.82572
TACCAGCACCCCGAGTAGTCGGGACGATTATTGGGCCTAAAGCATCCGTAGCTTGTCCTGCAAGTCTTCCGTTAAATCCACCTGCTCAACAGATGGGCTG	d__Archaea; p__Crenarchaeota; c__Nitrososphaeria; o__Nitrososphaerales; f__Nitrososphaeraceae; g__Candidatus_Nitrososphaera	0.975389
TACCAGCACCCCGAGTGGTCGGGACGATTATTGGGCCTAAAGCATCCGTAGCTTGTTCTGCAAGTCCTCCGTTAAATCCACCTGCTCAACAGATGGGCTG	d__Archaea; p__Crenarchaeota; c__Nitrososphaeria; o__Nitrososphaerales; f__Nitrososphaeraceae; g__Candidatus_Nitrososphaera	0.991101
TACCAGCACCCCGAGTGGTCGGGACGATTATTGGGCCTAAAGCATCCGTAGCTTGTTCTGCAAGTCTTCCGTTAAATCCACCTGCTCAACAGATGGGCCG	d__Archaea; p__Crenarchaeota; c__Nitrososphaeria; o__Nitrososphaerales; f__Nitrososphaeraceae; g__Candidatus_Nitrososphaera	0.967542
TACCAGCACCCCGAGTGGTCGGGACGATTATTGGGCCTAAAGCATCCGTAGCTTGTTCTGCAAGTCTTCCGTTAAATCCACCTGCTCAACAGATGGGCTG	d__Archaea; p__Crenarchaeota; c__Nitrososphaeria; o__Nitrososphaerales; f__Nitrososphaeraceae; g__Candidatus_Nitrososphaera	0.983247
ACCAGCACCCCGAGTGGTCGGGACGATTATTGGGCCTAAAGCATCCGTAGCCGGTTCTGCAAGTCCCCCGTTAAATCCAGCTGCTCAACAGATGGGCCGC	d__Archaea; p__Crenarchaeota; c__Nitrososphaeria; o__Nitrososphaerales; f__Nitrososphaeraceae; g__Nitrososphaeraceae	0.967947
ATACCAGCACCCCGAGTGGTCGGGACGTTTATTGGGCCTAAAGCATCCGTAGCCGGTTCTACAAGTCTTCCGTTAAATCCAACTGCTTAACAGGTGGGCT	d__Archaea; p__Crenarchaeota; c__Nitrososphaeria; o__Nitrososphaerales; f__Nitrososphaeraceae; g__Nitrososphaeraceae	0.87582
TACCAGCACCCCGAGTGGTCGGGACGATTATTGGGCCTAAAGCATCCGTAGCCGGCCTTACAAGTCCTCCGTTAAATCCAGCTGCTTAACAGATGGGCTG	d__Archaea; p__Crenarchaeota; c__Nitrososphaeria; o__Nitrososphaerales; f__Nitrososphaeraceae; g__Nitrososphaeraceae	0.936902
TACCAGCACCCCGAGTGGTCGGGACGATTATTGGGCCTAAAGCATCCGTAGCCGGTACTGCAAGTCTTCCGTTAAATCCACCTGCTTAACAGTTGGGCTG	d__Archaea; p__Crenarchaeota; c__Nitrososphaeria; o__Nitrososphaerales; f__Nitrososphaeraceae; g__Nitrososphaeraceae	0.876988
TACCAGCACCCCGAGTGGTCGGGACGATTATTGGGCCTAAAGCATCCGTAGCCGGTCATGCAAGTCCTCCGTTAAATCCACCTGCTTAACAGATGGGCTG	d__Archaea; p__Crenarchaeota; c__Nitrososphaeria; o__Nitrososphaerales; f__Nitrososphaeraceae; g__Nitrososphaeraceae	0.941262
TACCAGCACCCCGAGTGGTCGGGACGATTATTGGGCCTAAAGCATCCGTAGCCGGTCCTACAAGTCCTCCGCTAAATCCACCTGCTTAACAGATGGGCTG	d__Archaea; p__Crenarchaeota; c__Nitrososphaeria; o__Nitrososphaerales; f__Nitrososphaeraceae; g__Nitrososphaeraceae	0.776196
TACCAGCACCCCGAGTGGTCGGGACGATTATTGGGCCTAAAGCATCCGTAGCCGGTCCTACAAGTCCTCCGTTAAATCCACCTGCTTAACAGATGGGCTG	d__Archaea; p__Crenarchaeota; c__Nitrososphaeria; o__Nitrososphaerales; f__Nitrososphaeraceae; g__Nitrososphaeraceae	0.916867
TACCAGCACCCCGAGTGGTCGGGACGATTATTGGGCCTAAAGCATCCGTAGCCGGTCCTGCAAGTCCTCCGTTAAATCCACCCGCTCAACGGTTGGGCCG	d__Archaea; p__Crenarchaeota; c__Nitrososphaeria; o__Nitrososphaerales; f__Nitrososphaeraceae; g__Nitrososphaeraceae	0.983337
TACCAGCACCCCGAGTGGTCGGGACGATTATTGGGCCTAAAGCATCCGTAGCCGGTCTTGCAAGTCTTCCGTTAAATCCAGCCGCTTAACGGATGGGCTG	d__Archaea; p__Crenarchaeota; c__Nitrososphaeria; o__Nitrososphaerales; f__Nitrososphaeraceae; g__Nitrososphaeraceae	0.902678
TACCAGCACCCCGAGTGGTCGGGACGATTATTGGGCCTAAAGCATCCGTAGCCGGTCTTGCAAGTCTTCCGTTAAATCCAGCTGCTTAACGGATGGGCTG	d__Archaea; p__Crenarchaeota; c__Nitrososphaeria; o__Nitrososphaerales; f__Nitrososphaeraceae; g__Nitrososphaeraceae	0.846754
TACCAGCACCCCGAGTGGTCGGGACGATTATTGGGCCTAAAGCATCCGTAGCCGGTTCTGCAAGTCCCCCGTTAAATCCAGCTGCTCAACAGATGGGCCG	d__Archaea; p__Crenarchaeota; c__Nitrososphaeria; o__Nitrososphaerales; f__Nitrososphaeraceae; g__Nitrososphaeraceae	0.96836
TACCAGCACCCCGAGTGGTCGGGACGATTATTGGGCCTAAAGCATCCGTAGCCGGTTCTGCAAGTCTTCCGTTAAATCCAACTGCTTAACAGTTGGGCTG	d__Archaea; p__Crenarchaeota; c__Nitrososphaeria; o__Nitrososphaerales; f__Nitrososphaeraceae; g__Nitrososphaeraceae	0.779366
TACCAGCACCCCGAGTGGTCGGGACGATTATTGGGCCTAAAGCATCCGTAGCCGGTTTTACAAGTCCTCCGTTAAATCCAACTGCTTAACAGATGGGCCG	d__Archaea; p__Crenarchaeota; c__Nitrososphaeria; o__Nitrososphaerales; f__Nitrososphaeraceae; g__Nitrososphaeraceae	0.999196
TACCAGCACCCCGAGTGGTCGGGACGTTTATTGGGCCTAAAGCATCCGTAGCCGGTTCTACAAGTCTTCCGTTAAATCCAACTGCTTAACAGGTGGGCTG	d__Archaea; p__Crenarchaeota; c__Nitrososphaeria; o__Nitrososphaerales; f__Nitrososphaeraceae; g__Nitrososphaeraceae	0.84257
TACCAGCACCCCGAGTGGTCGGGACGATTATTGGGCCTAAAGCATCCGTAGCCGGTACTGCAAGTCTTCCGTTAAATCCACCTGCTCAACAGTTGGGCTG	d__Archaea; p__Crenarchaeota; c__Nitrososphaeria; o__Nitrososphaerales; f__Nitrososphaeraceae; g__Nitrososphaeraceae; s__metagenome	0.727388
TACCAGCACCCCGAGTGGTCGGGACGATTATTGGGCCTAAAGCATCCGTAGCCGGCCTTACAAGTCCCCCGTTAAATCCAACTGCTTAACAGATGGGCTG	d__Archaea; p__Crenarchaeota; c__Nitrososphaeria; o__Nitrososphaerales; f__Nitrososphaeraceae; g__Nitrososphaeraceae; s__uncultured_compost	0.846812
TACCAGCACCTCGAGTGGTCAGGAGGTTTATTGGGCCTAAAGCATCCGTAGCCGGCTTTGCAAGTCTCCGGTTAAATCCAACTGCTCAACAGATGGGCTG	d__Archaea; p__Crenarchaeota; c__Nitrososphaeria; o__Nitrosotaleales; f__Nitrosotaleaceae; g__Nitrosotaleaceae	0.999281
TACGGAAGGTCCGGGCGTTATCCGGATTTATTGGGCCTAAAGCGTCCGTAGCCGGTTTAATAAGTCTCTGGTGAAATCCCGCAGCTTAACTGTGGGAATT	d__Archaea; p__Euryarchaeota; c__Methanobacteria; o__Methanobacteriales	0.806355
TACGTAGGGGGCAAGCGTTATCCGGAATTACTGGGTGTAAAGCGTCCGTAGCCGGTTTAATAAGTCTCTGGTGAAATCCTGCAGCTTAACTGTGGGAATT	d__Archaea; p__Euryarchaeota; c__Methanobacteria; o__Methanobacteriales	0.702321
TACGTAGGTGGCGAGCGTTGTCCGGAATTATTGGGCCTAAAGCGTCCGTAGCCGGTTTAATAAGTCTCTGGTGAAATCTTGCAGCTTAACTGTGGGAATT	d__Archaea; p__Euryarchaeota; c__Methanobacteria; o__Methanobacteriales; f__Methanobacteriaceae	0.736671
CACCGGCAGCTCAAGTGGTGGCCATTATTATTGGGCCTAAAGCGTTCGTAGCCGGTTTGATAAGTCTCTGGTGAAATCCCGCAGCTTAACTGTGGGACTT	d__Archaea; p__Euryarchaeota; c__Methanobacteria; o__Methanobacteriales; f__Methanobacteriaceae; g__Methanobacterium; s__uncultured_Methanobacteriaceae	0.80106
ACCGGCAGCTCTAGTGGTAGCAGTTTTTATTGGGCCTAAAGCGTCCGTAGCCGGTTTAATAAGTCTCTGGTGAAATCCTGCAGCTTAACTGTGGGAATTG	d__Archaea; p__Euryarchaeota; c__Methanobacteria; o__Methanobacteriales; f__Methanobacteriaceae; g__Methanobrevibacter	0.999765
CACCAGCAGCTCTAGTGGTAGCAGTTTTTATTGGGCCTAAAGCGTCCGTAGCCGGTTTAATAAGTCTCTGGTGAAATCCTGCAGCTTAACTGTGGGAATT	d__Archaea; p__Euryarchaeota; c__Methanobacteria; o__Methanobacteriales; f__Methanobacteriaceae; g__Methanobrevibacter	0.999691
CACCGGCAGCTCTAGTGATAGCAGTTTTTATTGGGCCTAAAGCGTCCGTAGCCGGTTTAATAAGTCTCTGGTGAAATCCTGCAGCTTAACTGTGGGAATT	d__Archaea; p__Euryarchaeota; c__Methanobacteria; o__Methanobacteriales; f__Methanobacteriaceae; g__Methanobrevibacter	0.99903
CACCGGCAGCTCTAGTGGTAGCAATTTTTATTGGGCCTAAAGCGTCCGTAGCCGGTTTAATAAGTCTCTGGTGAAATCCTGCAGCTTAACTGTGGGAATT	d__Archaea; p__Euryarchaeota; c__Methanobacteria; o__Methanobacteriales; f__Methanobacteriaceae; g__Methanobrevibacter	0.987703
CACCGGCAGCTCTAGTGGTAGCAATTTTTATTGGGCCTAAAGCGTCCGTAGCCGGTTTAATAAGTCTCTGGTGAAATCCTGTAGCTTAACTATGGGAATT	d__Archaea; p__Euryarchaeota; c__Methanobacteria; o__Methanobacteriales; f__Methanobacteriaceae; g__Methanobrevibacter	0.993997
CACCGGCAGCTCTAGTGGTAGCAATTTTTATTGGGCCTAAAGCGTCCGTAGCCGGTTTAATAAGTCTCTGGTGAAATCCTGTAGCTTAACTGTGGGAATT	d__Archaea; p__Euryarchaeota; c__Methanobacteria; o__Methanobacteriales; f__Methanobacteriaceae; g__Methanobrevibacter	0.971495
CACCGGCAGCTCTAGTGGTAGCAGGTTTTATTGGGCCTAAAGCGTCCGTAGCCGGTTTAATAAGTCTCTGGTGAAATCCCGCAGCTTAACTGTGGGAATT	d__Archaea; p__Euryarchaeota; c__Methanobacteria; o__Methanobacteriales; f__Methanobacteriaceae; g__Methanobrevibacter	0.950603
CACCGGCAGCTCTAGTGGTAGCAGGTTTTATTGGGCCTAAAGCGTCCGTAGCCGGTTTAATAAGTCTCTGGTGAAATCCTGCAGCTTAACTGTGGGAATT	d__Archaea; p__Euryarchaeota; c__Methanobacteria; o__Methanobacteriales; f__Methanobacteriaceae; g__Methanobrevibacter	0.99395
CACCGGCAGCTCTAGTGGTAGCAGGTTTTATTGGGCCTAAAGCGTCCGTAGCCGGTTTAATAAGTCTCTGGTGAAATCCTGCAGCTTAACTGTGGGGATT	d__Archaea; p__Euryarchaeota; c__Methanobacteria; o__Methanobacteriales; f__Methanobacteriaceae; g__Methanobrevibacter	0.991683
CACCGGCAGCTCTAGTGGTAGCAGGTTTTATTGGGCCTAAAGCGTCCGTAGCCGGTTTAATAAGTCTCTGGTGAAATCCTGCCGCTTAACTGTGGGAATT	d__Archaea; p__Euryarchaeota; c__Methanobacteria; o__Methanobacteriales; f__Methanobacteriaceae; g__Methanobrevibacter	0.928
CACCGGCAGCTCTAGTGGTAGCAGGTTTTATTGGGCCTAAAGCGTCCGTAGCCGGTTTAATAAGTCTCTGGTGAAATCCTGCGGCTTAACTGTGGGAATT	d__Archaea; p__Euryarchaeota; c__Methanobacteria; o__Methanobacteriales; f__Methanobacteriaceae; g__Methanobrevibacter	0.936719
CACCGGCAGCTCTAGTGGTAGCAGGTTTTATTGGGCCTAAAGCGTCCGTAGCCGGTTTAATAAGTCTCTGGTGAAATCCTGTAGCTTAACTGTGGGAATT	d__Archaea; p__Euryarchaeota; c__Methanobacteria; o__Methanobacteriales; f__Methanobacteriaceae; g__Methanobrevibacter	0.947152
CACCGGCAGCTCTAGTGGTAGCAGGTTTTATTGGGCCTAAAGCGTCCGTAGCCGGTTTAATAAGTCTCTGGTGAAATCTTGCAGCTTAACTGTGGGAATT	d__Archaea; p__Euryarchaeota; c__Methanobacteria; o__Methanobacteriales; f__Methanobacteriaceae; g__Methanobrevibacter	0.954969
CACCGGCAGCTCTAGTGGTAGCAGGTTTTATTGGGCCTAAAGCGTCCGTAGCCGGTTTAATAAGTCTCTGGTGAAATTCTGCAGCTTAACTGTGGGAATT	d__Archaea; p__Euryarchaeota; c__Methanobacteria; o__Methanobacteriales; f__Methanobacteriaceae; g__Methanobrevibacter	0.973733
CACCGGCAGCTCTAGTGGTAGCAGGTTTTATTGGGCCTAAAGCGTCCGTAGCCGGTTTAATAAGTCTCTTGTGAAATCCTGCAGCTTAACTGTGGGAATT	d__Archaea; p__Euryarchaeota; c__Methanobacteria; o__Methanobacteriales; f__Methanobacteriaceae; g__Methanobrevibacter	0.989539
CACCGGCAGCTCTAGTGGTAGCAGTTATTATTGGGCCTAAAGCGTCCGTAGCCGGTTTAATAAGTCTCTGGTGAAATCCTGTAGCTTAACTATGGGAATT	d__Archaea; p__Euryarchaeota; c__Methanobacteria; o__Methanobacteriales; f__Methanobacteriaceae; g__Methanobrevibacter	0.987963
CACCGGCAGCTCTAGTGGTAGCAGTTTTATTGGGCCTAAAGCGTCCGTAGCCGGTTTAATAAGTCTCTGGTGAAATCCTGCAGCTTAACTGTGGGAATTG	d__Archaea; p__Euryarchaeota; c__Methanobacteria; o__Methanobacteriales; f__Methanobacteriaceae; g__Methanobrevibacter	0.999688
CACCGGCAGCTCTAGTGGTAGCAGTTTTATTGGGCCTAAAGCGTCCGTAGCCGGTTTAATAAGTCTCTGGTGAAATCCTGCAGCTTAACTGTGGGGATTG	d__Archaea; p__Euryarchaeota; c__Methanobacteria; o__Methanobacteriales; f__Methanobacteriaceae; g__Methanobrevibacter	0.999469
CACCGGCAGCTCTAGTGGTAGCAGTTTTTATTGGCCTAAAGCGTCCGTAGCCGGTTTAATAAGTCTCTGGTGAAATCCTGCAGCTTAACTGTGGGAATTG	d__Archaea; p__Euryarchaeota; c__Methanobacteria; o__Methanobacteriales; f__Methanobacteriaceae; g__Methanobrevibacter	0.999655
CACCGGCAGCTCTAGTGGTAGCAGTTTTTATTGGGCCTAAAGCGTCCGCAGCCGGTTTAATAAGTCTCTGGTGAAATCCTGCAGCTTAACTGTGGGAATT	d__Archaea; p__Euryarchaeota; c__Methanobacteria; o__Methanobacteriales; f__Methanobacteriaceae; g__Methanobrevibacter	0.999502
CACCGGCAGCTCTAGTGGTAGCAGTTTTTATTGGGCCTAAAGCGTCCGTAGCCGGTTTAATAAGTCTCTGGGGAAATCCTGCAGCTTAACTGTGGGAATT	d__Archaea; p__Euryarchaeota; c__Methanobacteria; o__Methanobacteriales; f__Methanobacteriaceae; g__Methanobrevibacter	0.999452
CACCGGCAGCTCTAGTGGTAGCAGTTTTTATTGGGCCTAAAGCGTCCGTAGCCGGTTTAATAAGTCTCTGGTGAAATCCTGAAGCTTAACTGTGGGAATT	d__Archaea; p__Euryarchaeota; c__Methanobacteria; o__Methanobacteriales; f__Methanobacteriaceae; g__Methanobrevibacter	0.994576
CACCGGCAGCTCTAGTGGTAGCAGTTTTTATTGGGCCTAAAGCGTCCGTAGCCGGTTTAATAAGTCTCTGGTGAAATCCTGCAGCTCAACTGTGGGAATT	d__Archaea; p__Euryarchaeota; c__Methanobacteria; o__Methanobacteriales; f__Methanobacteriaceae; g__Methanobrevibacter	0.998785
CACCGGCAGCTCTAGTGGTAGCAGTTTTTATTGGGCCTAAAGCGTCCGTAGCCGGTTTAATAAGTCTCTGGTGAAATCCTGCAGCTCAACTGTGGGGATT	d__Archaea; p__Euryarchaeota; c__Methanobacteria; o__Methanobacteriales; f__Methanobacteriaceae; g__Methanobrevibacter	0.998515
CACCGGCAGCTCTAGTGGTAGCAGTTTTTATTGGGCCTAAAGCGTCCGTAGCCGGTTTAATAAGTCTCTGGTGAAATCCTGCAGCTCCACTGTGGGAATT	d__Archaea; p__Euryarchaeota; c__Methanobacteria; o__Methanobacteriales; f__Methanobacteriaceae; g__Methanobrevibacter	0.998573
CACCGGCAGCTCTAGTGGTAGCAGTTTTTATTGGGCCTAAAGCGTCCGTAGCCGGTTTAATAAGTCTCTGGTGAAATCCTGCAGCTTAACTGTGGGAATT	d__Archaea; p__Euryarchaeota; c__Methanobacteria; o__Methanobacteriales; f__Methanobacteriaceae; g__Methanobrevibacter	0.999731
CACCGGCAGCTCTAGTGGTAGCAGTTTTTATTGGGCCTAAAGCGTCCGTAGCCGGTTTAATAAGTCTCTGGTGAAATCCTGCAGCTTAACTGTGGGGATT	d__Archaea; p__Euryarchaeota; c__Methanobacteria; o__Methanobacteriales; f__Methanobacteriaceae; g__Methanobrevibacter	0.99963
CACCGGCAGCTCTAGTGGTAGCAGTTTTTATTGGGCCTAAAGCGTCCGTAGCCGGTTTAATAAGTCTCTGGTGAAATCCTGCAGCTTTACTGTGGGAATT	d__Archaea; p__Euryarchaeota; c__Methanobacteria; o__Methanobacteriales; f__Methanobacteriaceae; g__Methanobrevibacter	0.999107
CACCGGCAGCTCTAGTGGTAGCAGTTTTTATTGGGCCTAAAGCGTCCGTAGCCGGTTTAATAAGTCTCTGGTGAAATCCTGCCGCTTAACTGTGGGAATT	d__Archaea; p__Euryarchaeota; c__Methanobacteria; o__Methanobacteriales; f__Methanobacteriaceae; g__Methanobrevibacter	0.996326
CACCGGCAGCTCTAGTGGTAGCAGTTTTTATTGGGCCTAAAGCGTCCGTAGCCGGTTTAATAAGTCTCTGGTGAAATCCTGCCGCTTAACTGTGGGGATT	d__Archaea; p__Euryarchaeota; c__Methanobacteria; o__Methanobacteriales; f__Methanobacteriaceae; g__Methanobrevibacter	0.99476
CACCGGCAGCTCTAGTGGTAGCAGTTTTTATTGGGCCTAAAGCGTCCGTAGCCGGTTTAATAAGTCTCTGGTGAAATCCTGCGGCTTAACTGTGGGAATT	d__Archaea; p__Euryarchaeota; c__Methanobacteria; o__Methanobacteriales; f__Methanobacteriaceae; g__Methanobrevibacter	0.997184
CACCGGCAGCTCTAGTGGTAGCAGTTTTTATTGGGCCTAAAGCGTCCGTAGCCGGTTTAATAAGTCTCTGGTGAAATCCTGTAGCTTAACTGTGGGAATT	d__Archaea; p__Euryarchaeota; c__Methanobacteria; o__Methanobacteriales; f__Methanobacteriaceae; g__Methanobrevibacter	0.997594
CACCGGCAGCTCTAGTGGTAGCAGTTTTTATTGGGCCTAAAGCGTCCGTAGCCGGTTTAATAAGTCTCTGGTGAAATCTTGCAGCTTAACTGTGGGAATT	d__Archaea; p__Euryarchaeota; c__Methanobacteria; o__Methanobacteriales; f__Methanobacteriaceae; g__Methanobrevibacter	0.998044
CACCGGCAGCTCTAGTGGTAGCAGTTTTTATTGGGCCTAAAGCGTCCGTAGCCGGTTTAATAAGTCTCTGGTGAAATCTTGCAGCTTTACTGTGGGAATT	d__Archaea; p__Euryarchaeota; c__Methanobacteria; o__Methanobacteriales; f__Methanobacteriaceae; g__Methanobrevibacter	0.993651
CACCGGCAGCTCTAGTGGTAGCAGTTTTTATTGGGCCTAAAGCGTCGTAGCCGGTTTAATAAGTCTCTGGTGAAATCCTGCAGCTTAACTGTGGGAATTG	d__Archaea; p__Euryarchaeota; c__Methanobacteria; o__Methanobacteriales; f__Methanobacteriaceae; g__Methanobrevibacter	0.999563
CACCGGCAGCTCTAGTGGTAGCAGTTTTTTTTGGGCCTAAAGCGTCCGTAGCCGGTTTAATAAGTCTCTGGTGAAATCCTGCAGCTTAACTGTGGGAATT	d__Archaea; p__Euryarchaeota; c__Methanobacteria; o__Methanobacteriales; f__Methanobacteriaceae; g__Methanobrevibacter	0.999075
CACCGGCAGCTCTAGTGGTAGCAGTTTTTTTTGGGCCTAAAGCGTCCGTAGCCGGTTTAATAAGTCTCTGGTGAAATCCTGCCGCTTAACTGTGGGAATT	d__Archaea; p__Euryarchaeota; c__Methanobacteria; o__Methanobacteriales; f__Methanobacteriaceae; g__Methanobrevibacter	0.987091
CACCGGCAGCTCTAGTGGTAGCAGTTTTTTTTGGGCCTAAAGCGTCCGTAGCCGGTTTAATAAGTCTCTGGTGAAATCCTGCCGCTTTACTGTGGGAATT	d__Archaea; p__Euryarchaeota; c__Methanobacteria; o__Methanobacteriales; f__Methanobacteriaceae; g__Methanobrevibacter	0.980259
CACCGGCAGCTCTAGTGGTAGCAGTTTTTTTTGGGCCTAAAGCGTCCGTAGCCGGTTTAATAAGTCTCTGGTGAAATCCTGTAGCTTAACTGTGGGAATT	d__Archaea; p__Euryarchaeota; c__Methanobacteria; o__Methanobacteriales; f__Methanobacteriaceae; g__Methanobrevibacter	0.986095
CACCGGCAGCTCTAGTGGTAGCAGTTTTTTTTGGGCCTAAAGCGTCCGTAGCCGGTTTAATAAGTCTCTGGTGAAATCCTGTAGCTTTACTGTGGGAATT	d__Archaea; p__Euryarchaeota; c__Methanobacteria; o__Methanobacteriales; f__Methanobacteriaceae; g__Methanobrevibacter	0.971438
CACCGGCAGCTCTAGTGGTAGCAGTTTTTTTTGGGCCTAAAGCGTCCGTAGCCGGTTTAATAAGTCTCTGGTGAAATCTTGCAGCTTAACTGTGGGAATT	d__Archaea; p__Euryarchaeota; c__Methanobacteria; o__Methanobacteriales; f__Methanobacteriaceae; g__Methanobrevibacter	0.992683
CACCGGCAGCTCTAGTGGTAGCAGTTTTTTTTGGGCCTAAAGCGTCCGTAGCCGGTTTAATAAGTCTCTGGTGAAATCTTGCAGCTTTACTGTGGGGATT	d__Archaea; p__Euryarchaeota; c__Methanobacteria; o__Methanobacteriales; f__Methanobacteriaceae; g__Methanobrevibacter	0.978695
CACCGGCAGCTCTAGTGGTAGCAGTTTTTTTTGGGCCTAAAGCGTCCGTAGCCGGTTTATTAAGTCTCTGGTGAAATCCTGTAGCTTAACTGTGGGAATT	d__Archaea; p__Euryarchaeota; c__Methanobacteria; o__Methanobacteriales; f__Methanobacteriaceae; g__Methanobrevibacter	0.973077
CACCGGCAGCTCTAGTGGTAGCCATTTTTATTGGGCCTAAAGCGTTCGTAGCCGGTTTAATAAGTCTCTGGTGAAATCCTATAGCTTAACTGTGGGAATT	d__Archaea; p__Euryarchaeota; c__Methanobacteria; o__Methanobacteriales; f__Methanobacteriaceae; g__Methanobrevibacter	0.976874
CACCGGCAGCTCTAGTGGTAGCCGGTTTTATTGGGCCTAAAGCGTCCGTAGCCGGTTTAATAAGTCTCTGGTGAAATCCTGCAGCTTAACTGTGGGAATT	d__Archaea; p__Euryarchaeota; c__Methanobacteria; o__Methanobacteriales; f__Methanobacteriaceae; g__Methanobrevibacter	0.994594
CACCGGCAGCTCTAGTGGTAGCTGTTTTTATTGGGCCTAAAGCGTTCGTAGCCGGTTTAATAAGTCTCTGGTGAAATCTTACAGCTTAACTGTGGGAATT	d__Archaea; p__Euryarchaeota; c__Methanobacteria; o__Methanobacteriales; f__Methanobacteriaceae; g__Methanobrevibacter	0.969721
CACCGGCAGCTCTAGTGGTAGCTGTTTTTATTGGGCCTAAAGCGTTCGTAGCCGGTTTGATAAGTCACTGGTGAAATCCTGTAGCTTAACTGTGGGAATT	d__Archaea; p__Euryarchaeota; c__Methanobacteria; o__Methanobacteriales; f__Methanobacteriaceae; g__Methanobrevibacter	0.938547
CACCGGCAGCTCTAGTGGTAGGAGTTTTATTGGGCCTAAAGCGTCCGTAGCCGGTTTAATAAGTCTCTGGTGAAATCCTGCAGCTTAACTGTGGGAATTG	d__Archaea; p__Euryarchaeota; c__Methanobacteria; o__Methanobacteriales; f__Methanobacteriaceae; g__Methanobrevibacter	0.993566
CACCGGCAGCTCTAGTGTAGCAGTTTTTATTGGGCCTAAAGCGTCCGTAGCCGGTTTAATAAGTCTCTGGTGAAATCCTGCAGCTTAACTGTGGGAATTG	d__Archaea; p__Euryarchaeota; c__Methanobacteria; o__Methanobacteriales; f__Methanobacteriaceae; g__Methanobrevibacter	0.999547
CACCGGCCGCTCTAGTGGTAGCAGTTTTTATTGGGCCTAAAGCGTCCGTAGCCGGTTTAATAAGTCTCTGGTGAAATCCTGCAGCTTAACTGTGGGAATT	d__Archaea; p__Euryarchaeota; c__Methanobacteria; o__Methanobacteriales; f__Methanobacteriaceae; g__Methanobrevibacter	0.999433
TACCGGCAGCTCTAGTGGTAGCAATTTTTATTGGCCTAAAGCGTCCGTAGCCGGTTTAATAAGTCTCTGGTGAAATCCTGTAGCTTAACTGTGGGAATTG	d__Archaea; p__Euryarchaeota; c__Methanobacteria; o__Methanobacteriales; f__Methanobacteriaceae; g__Methanobrevibacter	0.927706
TACGGAAGGTCTAGTGGTAGCAGTTTTTATTGGGCCTAAAGCGTCCGTAGCCGGTTTAATAAGTCTCTGGTGAAATCCTGCAGCTTAACTGTGGGAATTG	d__Archaea; p__Euryarchaeota; c__Methanobacteria; o__Methanobacteriales; f__Methanobacteriaceae; g__Methanobrevibacter	0.999301
TACGTAGGGGGCAAGCGTTATCCGGAATTATTGGGCCTAAAGCGTCCGTAGCCGGTTTAATAAGTCTCTGGTGAAATCCTGCAGCTTAACTGTGGGAATT	d__Archaea; p__Euryarchaeota; c__Methanobacteria; o__Methanobacteriales; f__Methanobacteriaceae; g__Methanobrevibacter	0.905279
TACGTAGGGGGCGAGCGTTATCCGGATTCATTGGGCGTAAAGCGTCCGTAGCCGGTTTAATAAGTCTCTGGTGAAATCCTGCAGCTTAACTGTGGGAATT	d__Archaea; p__Euryarchaeota; c__Methanobacteria; o__Methanobacteriales; f__Methanobacteriaceae; g__Methanobrevibacter	0.73801
TACGTAGGGGGCGAGCGTTGTCCGGAATTATTGGGCCTAAAGCGTCCGTAGCCGGTTTAATAAGTCTCTGGTGAAATCCTGCAGCTTAACTGTGGGAATT	d__Archaea; p__Euryarchaeota; c__Methanobacteria; o__Methanobacteriales; f__Methanobacteriaceae; g__Methanobrevibacter	0.935899
TACGTAGGTGGCAAGCGTTGTCCGGAATTATTGGGCCTAAAGCGTCCGTAGCCGGTTTAATAAGTCTCTGGTGAAATCCTGCAGCTTAACTGTGGGAATT	d__Archaea; p__Euryarchaeota; c__Methanobacteria; o__Methanobacteriales; f__Methanobacteriaceae; g__Methanobrevibacter	0.934181
TACGTAGGTGGCGAGCGTTGTCCGGAATTATTGGGCCTAAAGCGTCCGTAGCCGGTTTAATAAGTCTCTGGTGAAATCCTGCAGCTTAACTGTGGGAATT	d__Archaea; p__Euryarchaeota; c__Methanobacteria; o__Methanobacteriales; f__Methanobacteriaceae; g__Methanobrevibacter	0.940737
CACCGGCAGCTCTAGTGGTAGCAGGTTTTATTGGGCCTAAAGCGTCCGTAGCCGGTTTAATAAGTCTCTGGGGAAATCCTGCAGCTTAACTGTGGGAATT	d__Archaea; p__Euryarchaeota; c__Methanobacteria; o__Methanobacteriales; f__Methanobacteriaceae; g__Methanobrevibacter; s__Methanobrevibacter_smithii	0.738216
CACCGGCAGCTCTAGTGGTAGCAGGTTTTATTGGGCCTAAAGCGTCCGTAGCCGGTTTAATAAGTCTCTGGTGAAATCCTGCAGCTTTACTGTGGGAATT	d__Archaea; p__Euryarchaeota; c__Methanobacteria; o__Methanobacteriales; f__Methanobacteriaceae; g__Methanobrevibacter; s__Methanobrevibacter_smithii	0.722117
CACCGGCAGCTCTAGTGGTAGCAGGTTTTATTGGGCCTAAAGGGTCCGTAGCCGGTTTAATAAGTCTCTGGTGAAATCCTGCAGCTTAACTGTGGGAATT	d__Archaea; p__Euryarchaeota; c__Methanobacteria; o__Methanobacteriales; f__Methanobacteriaceae; g__Methanobrevibacter; s__Methanobrevibacter_smithii	0.739864
CACCGGCAGCTCTAGTGGTAGCAGTTTTTATTGGGCCTAAAGCGTCCGTAGCCGGTTTAATAAGTCTCTGGGGAAATCCTGCAGCTTAACTGTGGGGATT	d__Archaea; p__Euryarchaeota; c__Methanobacteria; o__Methanobacteriales; f__Methanobacteriaceae; g__Methanobrevibacter; s__Methanobrevibacter_smithii	0.702786
CACCGGCAGCTCTAGTGGTAGCAGTTTTTATTGGGCCTAAAGCGTCCGTAGCCGGTTTAATAAGTCTCTGGGGAAATCCTGCAGCTTTACTGTGGGAATT	d__Archaea; p__Euryarchaeota; c__Methanobacteria; o__Methanobacteriales; f__Methanobacteriaceae; g__Methanobrevibacter; s__Methanobrevibacter_smithii	0.779436
CACCGGCAGCTCTAGTGGTAGCAGTTTTTATTGGGCCTAAAGCGTCCGTAGCCGGTTTAATAAGTCTCTGGGGAAATCCTGCAGCTTTACTGTGGGGATT	d__Archaea; p__Euryarchaeota; c__Methanobacteria; o__Methanobacteriales; f__Methanobacteriaceae; g__Methanobrevibacter; s__Methanobrevibacter_smithii	0.826372
CACCGGCAGCTCTAGTGGTAGCAGTTTTTATTGGGCCTAAAGCGTCCGTAGCCGGTTTAATAAGTCTCTGGTGAAATCCTGCAGCTTTACTGTGGGGATT	d__Archaea; p__Euryarchaeota; c__Methanobacteria; o__Methanobacteriales; f__Methanobacteriaceae; g__Methanobrevibacter; s__Methanobrevibacter_smithii	0.712498
CACCGGCAGCTCTAGTGGTAGCAGTTTTTTTTGGGCCTAAAGCGTCCGTAGCCGGTTTAATAAGTCTCTGGGGAAATCCTGCAGCTTAACTGTGGGAATT	d__Archaea; p__Euryarchaeota; c__Methanobacteria; o__Methanobacteriales; f__Methanobacteriaceae; g__Methanobrevibacter; s__Methanobrevibacter_smithii	0.801515
CACCGGCAGCTCTAGTGGTAGCAGTTTTTTTTGGGCCTAAAGCGTCCGTAGCCGGTTTAATAAGTCTCTGGGGAAATCCTGCAGCTTTACTGTGGGGATT	d__Archaea; p__Euryarchaeota; c__Methanobacteria; o__Methanobacteriales; f__Methanobacteriaceae; g__Methanobrevibacter; s__Methanobrevibacter_smithii	0.872248
CACCGGCAGCTCTAGTGGTAGCAGTTTTTTTTGGGCCTAAAGCGTCCGTAGCCGGTTTAATAAGTCTCTGGTGAAATCCTGCAGCTCAACTGTGGGAATT	d__Archaea; p__Euryarchaeota; c__Methanobacteria; o__Methanobacteriales; f__Methanobacteriaceae; g__Methanobrevibacter; s__Methanobrevibacter_smithii	0.718119
CACCGGCAGCTCTAGTGGTAGCAGTTTTTTTTGGGCCTAAAGCGTCCGTAGCCGGTTTAATAAGTCTCTGGTGAAATCCTGCAGCTTAACTGTGGGGATT	d__Archaea; p__Euryarchaeota; c__Methanobacteria; o__Methanobacteriales; f__Methanobacteriaceae; g__Methanobrevibacter; s__Methanobrevibacter_smithii	0.734135
CACCGGCAGCTCTAGTGGTAGCAGTTTTTTTTGGGCCTAAAGCGTCCGTAGCCGGTTTAATAAGTCTCTGGTGAAATCCTGCAGCTTTACTGTGGGAATT	d__Archaea; p__Euryarchaeota; c__Methanobacteria; o__Methanobacteriales; f__Methanobacteriaceae; g__Methanobrevibacter; s__Methanobrevibacter_smithii	0.785374
CACCGGCAGCTCTAGTGGTAGCAGTTTTTTTTGGGCCTAAAGCGTCCGTAGCCGGTTTAATAAGTCTCTGGTGAAATCCTGCAGCTTTACTGTGGGGATT	d__Archaea; p__Euryarchaeota; c__Methanobacteria; o__Methanobacteriales; f__Methanobacteriaceae; g__Methanobrevibacter; s__Methanobrevibacter_smithii	0.821571
CACCGGCAGCTCTAGTGGTAGGAGTTTTTTTTGGGCCTAAAGCGTCCGTAGCCGGTTTAATAAGTCTCTGGGGAAATCCTGCAGCTTTACTGTGGGGATT	d__Archaea; p__Euryarchaeota; c__Methanobacteria; o__Methanobacteriales; f__Methanobacteriaceae; g__Methanobrevibacter; s__Methanobrevibacter_smithii	0.809593
CACCGGCAGCTCTAGTGGTAGGAGTTTTTTTTGGGCCTAAAGCGTCCGTAGCCGGTTTAATAAGTCTCTGGTGAAATCCTGCAGCTTTACTGTGGGGATT	d__Archaea; p__Euryarchaeota; c__Methanobacteria; o__Methanobacteriales; f__Methanobacteriaceae; g__Methanobrevibacter; s__Methanobrevibacter_smithii	0.79983
TACAGAGGTCTCAAGCGTTGTTCGGAATTACTGGGCCTAAAGCGTCCGTAGCCGGTTTAATAAGTCTCTGGTGAAATCCTGCAGCTTAACTGTGGGAATT	d__Archaea; p__Euryarchaeota; c__Methanobacteria; o__Methanobacteriales; f__Methanobacteriaceae; g__Methanobrevibacter; s__Methanobrevibacter_smithii	0.798508
TACGGAAGGTCCGGGCGTTATCCGGATTTATTGGGCCTAAAGCGTCCGTAGCCGGTTTAATAAGTCTCTGGTGAAATCCTGCAGCTTAACTGTGGGAATT	d__Archaea; p__Euryarchaeota; c__Methanobacteria; o__Methanobacteriales; f__Methanobacteriaceae; g__Methanobrevibacter; s__Methanobrevibacter_smithii	0.836048
TACGGAGGATGCGAGCGTTATCCGGAATTATTGGGCCTAAAGCGTCCGTAGCCGGTTTAATAAGTCTCTGGTGAAATCCTGCAGCTTAACTGTGGGAATT	d__Archaea; p__Euryarchaeota; c__Methanobacteria; o__Methanobacteriales; f__Methanobacteriaceae; g__Methanobrevibacter; s__Methanobrevibacter_smithii	0.773654
TACGTAGGGAGCGAGCGTTGTCCGGATTTACTGGGCCTAAAGCGTCCGTAGCCGGTTTAATAAGTCTCTGGTGAAATCCTGCAGCTTAACTGTGGGAATT	d__Archaea; p__Euryarchaeota; c__Methanobacteria; o__Methanobacteriales; f__Methanobacteriaceae; g__Methanobrevibacter; s__Methanobrevibacter_smithii	0.771587
TACGTAGGGGGCAAGCGTTATCCGGATTTATTGGGCCTAAAGCGTCCGTAGCCGGTTTAATAAGTCTCTGGTGAAATCCTGCAGCTTAACTGTGGGAATT	d__Archaea; p__Euryarchaeota; c__Methanobacteria; o__Methanobacteriales; f__Methanobacteriaceae; g__Methanobrevibacter; s__Methanobrevibacter_smithii	0.722094
TACGTAGGGGGCGAGCGTTATCCGGAATTATTGGGCCTAAAGCGTCCGTAGCCGGTTTAATAAGTCTCTGGTGAAATCCTGCAGCTTAACTGTGGGAATT	d__Archaea; p__Euryarchaeota; c__Methanobacteria; o__Methanobacteriales; f__Methanobacteriaceae; g__Methanobrevibacter; s__Methanobrevibacter_smithii	0.709432
TACGTAGGGGGCTAGCGTTATCCGGATTTATTGGGCCTAAAGCGTCCGTAGCCGGTTTAATAAGTCTCTGGTGAAATCCTGCAGCTTAACTGTGGGAATT	d__Archaea; p__Euryarchaeota; c__Methanobacteria; o__Methanobacteriales; f__Methanobacteriaceae; g__Methanobrevibacter; s__Methanobrevibacter_smithii	0.792725
TACGTAGGTCCCGAGCGTTGTCCGGATTTATTGGGCCTAAAGCGTCCGTAGCCGGTTTAATAAGTCTCTGGTGAAATCCTGCAGCTTAACTGTGGGAATT	d__Archaea; p__Euryarchaeota; c__Methanobacteria; o__Methanobacteriales; f__Methanobacteriaceae; g__Methanobrevibacter; s__Methanobrevibacter_smithii	0.760811
TACGTAGGTGGCAAGCGTTATCCGGATTTACTGGGCCTAAAGCGTCCGTAGCCGGTTTAATAAGTCTCTGGTGAAATCCTGCAGCTTAACTGTGGGAATT	d__Archaea; p__Euryarchaeota; c__Methanobacteria; o__Methanobacteriales; f__Methanobacteriaceae; g__Methanobrevibacter; s__Methanobrevibacter_smithii	0.778974
TACGTAGGTGGCAAGCGTTGTCCGGATTTATTGGGCCTAAAGCGTCCGTAGCCGGTTTAATAAGTCTCTGGTGAAATCCTGCAGCTTAACTGTGGGAATT	d__Archaea; p__Euryarchaeota; c__Methanobacteria; o__Methanobacteriales; f__Methanobacteriaceae; g__Methanobrevibacter; s__Methanobrevibacter_smithii	0.728846
TACGTAGGTGGCGAGCGTTATCCGGAATTATTGGGCCTAAAGCGTCCGTAGCCGGTTTAATAAGTCTCTGGTGAAATCCTGCAGCTTAACTGTGGGAATT	d__Archaea; p__Euryarchaeota; c__Methanobacteria; o__Methanobacteriales; f__Methanobacteriaceae; g__Methanobrevibacter; s__Methanobrevibacter_smithii	0.757996
TACGTAGGTGGCGAGCGTTATCCGGATTCATTGGGCCTAAAGCGTCCGTAGCCGGTTTAATAAGTCTCTGGTGAAATCCTGCAGCTTAACTGTGGGAATT	d__Archaea; p__Euryarchaeota; c__Methanobacteria; o__Methanobacteriales; f__Methanobacteriaceae; g__Methanobrevibacter; s__Methanobrevibacter_smithii	0.792473
CACCGGCAGCTCTAGTGGTGGCCATTTTTATTGGGCCTAAAGCGTTCGTAGCCGGTTTAATAAGTCTTTGGTGAAATCCTGTAGCTTAACTGTGGGACTT	d__Archaea; p__Euryarchaeota; c__Methanobacteria; o__Methanobacteriales; f__Methanobacteriaceae; g__Methanobrevibacter; s__Methanobrevibacter_sp.	0.88566
CACCGGCAGCTCTAGTGGTAGCTGTTTTTATTGGGCCTGAAGCGTTCGTAGCCGGTTTGATAAGTCTCTGGTGAAATCTTGTAGCTTAACTGTGGGAATT	d__Archaea; p__Euryarchaeota; c__Methanobacteria; o__Methanobacteriales; f__Methanobacteriaceae; g__Methanobrevibacter; s__Methanobrevibacter_wolinii	0.978743
CACCGGCAGCTCTAGTGGTAGCAGTTTTTATTGGGCCTAAGCGTCCGTAGCCGGTTTAATAAGTCTCTGGTGAAATCCTGCAGCTTAACTGTGGGAATTG	d__Archaea; p__Euryarchaeota; c__Methanobacteria; o__Methanobacteriales; f__Methanobacteriaceae; g__Methanobrevibacter; s__uncultured_Methanobacteriales	0.726755
CACCGGCAGCTCTAGTGGTGACCATTTTTATTGGGCCTAAAGCGTTCGTAGCCGGTTTAATAAGTCTTTGGTGAAATCCTGCAGCTTAACTGCGGGAATT	d__Archaea; p__Euryarchaeota; c__Methanobacteria; o__Methanobacteriales; f__Methanobacteriaceae; g__Methanobrevibacter; s__uncultured_Methanobrevibacter	0.762201
CACCGGCAGCTCAAGTGGTAACTGTTTTTATTGGGCCTAAAGCGTTCGTAGCCGGTTTGATAAGTCTTTGGTGAAAGCTTGTAGCTTAACTATAAGAATT	d__Archaea; p__Euryarchaeota; c__Methanobacteria; o__Methanobacteriales; f__Methanobacteriaceae; g__Methanosphaera	0.999974
CACCGGCAGCTCAAGTGGTAACTGTTTTTATTGGGTCTAAAGCGTTCGTAGCCGGTTTGATAAGTCTTTGGTGAAAGCTTGTAGCTTAACTATAAGAATT	d__Archaea; p__Euryarchaeota; c__Methanobacteria; o__Methanobacteriales; f__Methanobacteriaceae; g__Methanosphaera	0.999976
CACCGGCAGCTCAAGTGGTAGCTGGTTTTATTGGGCCTAAAGCGTTCGTAGCCGGTTTGATAAGTCTTTGGTGAAAGCTTGTAGCTTAACTATAAGAATT	d__Archaea; p__Euryarchaeota; c__Methanobacteria; o__Methanobacteriales; f__Methanobacteriaceae; g__Methanosphaera	0.999989
CACCGGCAGCTCAAGTGGTAGCTGTTTTATTGGGCCTAAAGCGTTCGTAGCCGGTTTGATAAGTCTTTGGTGAAAGCTTGTAGCTTAACTATAAGAATTG	d__Archaea; p__Euryarchaeota; c__Methanobacteria; o__Methanobacteriales; f__Methanobacteriaceae; g__Methanosphaera	0.999998
CACCGGCAGCTCAAGTGGTAGCTGTTTTTATTGGGCCTAAAGCGTTCGTAGCCGGTTTGATAAGTCTTTGGGGAAAGCTTGTAGCTTAACTATAAGAATT	d__Archaea; p__Euryarchaeota; c__Methanobacteria; o__Methanobacteriales; f__Methanobacteriaceae; g__Methanosphaera	0.999991
CACCGGCAGCTCAAGTGGTAGCTGTTTTTATTGGGCCTAAAGCGTTCGTAGCCGGTTTGATAAGTCTTTGGTGAAAGCTTGTAACTTAACTATAAGAATT	d__Archaea; p__Euryarchaeota; c__Methanobacteria; o__Methanobacteriales; f__Methanobacteriaceae; g__Methanosphaera	0.999993
CACCGGCAGCTCAAGTGGTAGCTGTTTTTATTGGGCCTAAAGCGTTCGTAGCCGGTTTGATAAGTCTTTGGTGAAAGCTTGTAGCTTAACTATAAGAATT	d__Archaea; p__Euryarchaeota; c__Methanobacteria; o__Methanobacteriales; f__Methanobacteriaceae; g__Methanosphaera	0.999996
CACCGGCAGCTCAAGTGGTAGCTGTTTTTATTGGGCCTAAAGCGTTCGTAGCCGGTTTGATAAGTCTTTGGTGAAAGCTTGTAGCTTTACTATAAGAATT	d__Archaea; p__Euryarchaeota; c__Methanobacteria; o__Methanobacteriales; f__Methanobacteriaceae; g__Methanosphaera	0.999987
CACCGGCAGCTCAAGTGGTAGCTGTTTTTATTGGGCCTAAAGCGTTCGTAGCCGGTTTGATAAGTCTTTGGTGAAAGCTTGTCGCTTAACTATAAGAATT	d__Archaea; p__Euryarchaeota; c__Methanobacteria; o__Methanobacteriales; f__Methanobacteriaceae; g__Methanosphaera	0.999984
CACCGGCAGCTCAAGTGGTAGCTGTTTTTATTGGGCCTAAAGCGTTCGTAGCTGGTTTGATAAGTCTTTGGTGAAAGCTTGTAGCTTAACTATAAGAATT	d__Archaea; p__Euryarchaeota; c__Methanobacteria; o__Methanobacteriales; f__Methanobacteriaceae; g__Methanosphaera	0.999993
CACCGGCAGCTCAAGTGGTAGCTGTTTTTATTGGGCCTAAAGTGTTCGTAGCCGGTTTGATAAGTCTTTGGTGAAAGCTTGTAGCTTAACTATAAGAATT	d__Archaea; p__Euryarchaeota; c__Methanobacteria; o__Methanobacteriales; f__Methanobacteriaceae; g__Methanosphaera	0.999994
CACCGGCAGCTCAAGTGTAGCTGTTTTTATTGGGCCTAAAGCGTTCGTAGCCGGTTTGATAAGTCTTTGGTGAAAGCTTGTAGCTTAACTATAAGAATTG	d__Archaea; p__Euryarchaeota; c__Methanobacteria; o__Methanobacteriales; f__Methanobacteriaceae; g__Methanosphaera	0.999991
CACCGGCAGCTCGAGTGGTAGCTGTTTTTATTGGGCCTAAAGCGTTCGTAGCCGGTTTGATAAGTCTTTGGTGAAAGCTTGTAGCTTAACTATAAGAATT	d__Archaea; p__Euryarchaeota; c__Methanobacteria; o__Methanobacteriales; f__Methanobacteriaceae; g__Methanosphaera	0.999972
CACCGGCAGCTCGAGTGGTAGCTGTTTTTATTGGGCCTAAAGCGTTCGTAGCCGGTTTGATTAGTCTTTGGTGAAAGCTTGTAGCTTAACTATAAGAATT	d__Archaea; p__Euryarchaeota; c__Methanobacteria; o__Methanobacteriales; f__Methanobacteriaceae; g__Methanosphaera	0.999995
CACCGGCAGTTCAAGTGGTAGCTGTTTTTATTGGGCCTAAAGCGTTCGTAGCCGGTTTGATAAGTCTTTGGTGAAAGCTTGTAGCTTAACTATAAGAATT	d__Archaea; p__Euryarchaeota; c__Methanobacteria; o__Methanobacteriales; f__Methanobacteriaceae; g__Methanosphaera	0.999983
TACCGGCAGCTCAAGTGGTAGCTGTTTTTATTGGGCCTAAAGCGTTCGTAGCCGGTTTAATAAGTCTTTGGTGAAAGCTTGTAGCTTAACTATAAGAATT	d__Archaea; p__Euryarchaeota; c__Methanobacteria; o__Methanobacteriales; f__Methanobacteriaceae; g__Methanosphaera	0.999974
TACGGAAGGTCAAGTGGTAGCTGTTTTTATTGGGCCTAAAGCGTTCGTAGCCGGTTTGATAAGTCTTTGGTGAAAGCTTGTAGCTTAACTATAAGAATTG	d__Archaea; p__Euryarchaeota; c__Methanobacteria; o__Methanobacteriales; f__Methanobacteriaceae; g__Methanosphaera	0.999988
TACGTAGGGAGCGAGCGTTATCCGGATTTATTGGGCCTAAAGCGTTCGTAGCCGGTTTGATAAGTCTTTGGTGAAAGCTTGTAGCTTAACTATAAGAATT	d__Archaea; p__Euryarchaeota; c__Methanobacteria; o__Methanobacteriales; f__Methanobacteriaceae; g__Methanosphaera	0.999491
TACGTAGGGGGCAAGCGTTATCCGGAATTATTGGGCCTAAAGCGTTCGTAGCCGGTTTGATAAGTCTTTGGTGAAAGCTTGTAGCTTAACTATAAGAATT	d__Archaea; p__Euryarchaeota; c__Methanobacteria; o__Methanobacteriales; f__Methanobacteriaceae; g__Methanosphaera	0.999482
TACGTAGGTGGCAAGCGTTATCCGGAATTATTGGGCCTAAAGCGTTCGTAGCCGGTTTGATAAGTCTTTGGTGAAAGCTTGTAGCTTAACTATAAGAATT	d__Archaea; p__Euryarchaeota; c__Methanobacteria; o__Methanobacteriales; f__Methanobacteriaceae; g__Methanosphaera	0.997847
TACCGGCAGCTCAAGTGGTATCTGTTTTTATTGGGCCTAAAGCGTTCGTAGCCGGTTTAATAAGTCTTTGGTGAAAGCTTGTAGCTTAACTATAAGAATT	d__Archaea; p__Euryarchaeota; c__Methanobacteria; o__Methanobacteriales; f__Methanobacteriaceae; g__Methanosphaera; s__uncultured_archaeon	0.763199
CACCGGCAGCTCAAGTGGTAGCTGTTTTTATTGGGCCTAAAGCGTTCGTAGCCGGTTTGATAAGTCTTTGGTGAAAGCTTATAGCTTAACTGTAAGAATT	d__Archaea; p__Euryarchaeota; c__Methanobacteria; o__Methanobacteriales; f__Methanobacteriaceae; g__Methanosphaera; s__uncultured_rumen	0.900781
TACCGGCAGCTCAAGTGATGGCCAATCTTATTGGGCCTAAAGCGTCCGTAGCCGGCCAGACAGGTTCGTCGGGAAATCTGCTCGCTCAACGAGCAGGCGT	d__Archaea; p__Halobacterota; c__Halobacteria; o__Halobacterales; f__Haloadaptaceae; g__Haladaptatus	0.993033
TACCGGCAGCTCAAGTGATGGCCAATCTTATTGGGCCTAAAGCGTCCGTAGCCGGCCGAACAGGTCCGTCGGGAAATCTGCTCGCTCAACGAGCAGGCGT	d__Archaea; p__Halobacterota; c__Halobacteria; o__Halobacterales; f__Haloadaptaceae; g__Haladaptatus	0.99651
TACCGGCAGCTCGAGTGATGACCGCTATTATTGGGCCTAAAGCGTCCGTAGCCGGCCGAACAGGTCCGTTGGGAAATCTGCTCGCTCAACGAGCAGGCGT	d__Archaea; p__Halobacterota; c__Halobacteria; o__Halobacterales; f__Haloadaptaceae; g__Haladaptatus; s__uncultured_archaeon	0.996203
TACCGGCAGCTCAAGTGATGACCGATTTTATTGGGCCTAAAGCGTCCGTAGCTGGCCGCGATGGTCCGTCGGGAAATCCAGCCGCTCAACGGCTGGGCGT	d__Archaea; p__Halobacterota; c__Halobacteria; o__Halobacterales; f__Haloferacaceae	0.9643
TACCGGCTGCTCGAGTGATGGCCACTATTACTGGGTTTAAAGCGTCCGTAGCTTGACTGTTAGGTCTCTTGGGAAATCTTTCGGCTCAACCAAAAGGCGT	d__Archaea; p__Halobacterota; c__Methanomicrobia; o__Methanomicrobiales; f__Methanocorpusculaceae; g__Methanocorpusculum	0.999997
TACCGGCTGCTCGAGTGATGGCCACTATTACTGGGTTTAAAGCGTCCGTAGCTTGACTGTTAGGTCTCTTGGGAAATCTTTTGGCTCAACCAAAAGGCGT	d__Archaea; p__Halobacterota; c__Methanomicrobia; o__Methanomicrobiales; f__Methanocorpusculaceae; g__Methanocorpusculum	0.99997
TACCGGCTGCTCGAGTGATGGCCACTATTACTGGGTTTAAAGCGTCCGTAGCTTGACTGTTAGGTCTCTTGGGAAATCTTTTGGCTCAACCAAGAGGCGT	d__Archaea; p__Halobacterota; c__Methanomicrobia; o__Methanomicrobiales; f__Methanocorpusculaceae; g__Methanocorpusculum	0.999997
TACCGGCTGCTCGAGTGATGGCCACTATTACTGGGTTTAAAGCGTCCGTAGCTTGACTGTTAGGTCTCTTGGGAAATCTTTTGGCTCGACCAAAAGGCGT	d__Archaea; p__Halobacterota; c__Methanomicrobia; o__Methanomicrobiales; f__Methanocorpusculaceae; g__Methanocorpusculum	0.999997
TACCGGCTGCTCGAGTGATGGCCACTATTACTGGGTTTAAAGCGTCCGTAGCTTGATTGTTAGGTCTCTTGGGAAATCTTCTGGCTTAACCAAAAGGCGT	d__Archaea; p__Halobacterota; c__Methanomicrobia; o__Methanomicrobiales; f__Methanocorpusculaceae; g__Methanocorpusculum	0.999971
TACCGGCTGCTCGGGTGATGGCCACTATTACTGGGTTTAAAGCGTCCGTAGCTTGACTGTTAGGTCTCTTGGGAAATCTTTTGGCTCAACCAAAAGGCGT	d__Archaea; p__Halobacterota; c__Methanomicrobia; o__Methanomicrobiales; f__Methanocorpusculaceae; g__Methanocorpusculum	0.999965
TACCGGCTGCTCGAGTGATGGCCACTATTACTGGGTTTAAAGCGTCCGTAGCTTGATTCTTAGGTCTCTTGGGAAATCTTAACGCTCAACGTTAAGGCGT	d__Archaea; p__Halobacterota; c__Methanomicrobia; o__Methanomicrobiales; f__Methanocorpusculaceae; g__Methanocorpusculum; s__uncultured_archaeon	0.979521
TACCGGCTGCTCGAGTGATGGCCACTATTACTGGGTTTAAAGCGTCCGTAGCTTGATTCTTAGGTCTCTTGGGAAGTCTTAACGCTCAACGTTAAGGCGT	d__Archaea; p__Halobacterota; c__Methanomicrobia; o__Methanomicrobiales; f__Methanocorpusculaceae; g__Methanocorpusculum; s__uncultured_archaeon	0.794982
TACCGGCTGCTCGAGTGATGGCCACTATTACTGGGTTTAAAGCGTCCGTAGCTTGATTTTTAGGTCTCTTGGGAAATCTTAACGCTCAACGTTAAGGCGT	d__Archaea; p__Halobacterota; c__Methanomicrobia; o__Methanomicrobiales; f__Methanocorpusculaceae; g__Methanocorpusculum; s__uncultured_archaeon	0.979962
TACCGGCTGCTCGAGTGATGGCCACTATTACTGGGTTTAAAGCGTCCGTAGCTTGATTTTTAGGTCTCTTGGGGAATCTTAACGCTCAACGTTAAGGCGT	d__Archaea; p__Halobacterota; c__Methanomicrobia; o__Methanomicrobiales; f__Methanocorpusculaceae; g__Methanocorpusculum; s__uncultured_archaeon	0.975527
TACCGGCTGCTCGAGTGATGGCCACTATTACTGGGTTTAAATCGTCCGTAGCTTGATTCTTAGGTCTCTTGGGAAATCTTAACGCTCAACGTTAAGGCGT	d__Archaea; p__Halobacterota; c__Methanomicrobia; o__Methanomicrobiales; f__Methanocorpusculaceae; g__Methanocorpusculum; s__uncultured_archaeon	0.8504
TACCGGCTGCTCGGGTGATGGCCACTATTACTGGGTTTAAAGCGTCCGTAGCTTGATTTTTAGGTCTCTTGGGAAATCTTAACGCTCAACGTTAAGGCGT	d__Archaea; p__Halobacterota; c__Methanomicrobia; o__Methanomicrobiales; f__Methanocorpusculaceae; g__Methanocorpusculum; s__uncultured_archaeon	0.898723
TACAGGTGGCCCGAGTGGTAGCCACGTTTATTTGGTCTAAAGGGTCCGTAGCCGGTTTAGTCAGTCCATTGGGAAATCCAGATGCTTAACATTTGGGCTA	d__Archaea; p__Halobacterota; c__Methanosarcinia; o__Methanosarciniales; f__Methanosarcinaceae; g__Methanimicrococcus	0.888115
TACCAGTGGCCCGAGTGGTAGCCACTTTTATTTGGTCTAAAGGGTCCGTAGCCGGTTTAGTCAGTCCATTGGGAAATCCAGATGCTTAACATTTGGGCTA	d__Archaea; p__Halobacterota; c__Methanosarcinia; o__Methanosarciniales; f__Methanosarcinaceae; g__Methanimicrococcus	0.959544
TACCGGTGGCCCGAGTGGTAGCCACTTTTATTTGGTCTAAAGGGCCCGTAGCCGGTTTGGTCAGTCCATTGGGAAATCCAGATGCTTAACATTTGGGCTA	d__Archaea; p__Halobacterota; c__Methanosarcinia; o__Methanosarciniales; f__Methanosarcinaceae; g__Methanimicrococcus	0.990407
TACCGGTGGCCCGAGTGGTAGCCACTTTTATTTGGTCTAAAGGGTCCGTAGCCGGTTTAGTCAGTCCATTGGGAAATCCAGATGCTTAACATTTGGGCCA	d__Archaea; p__Halobacterota; c__Methanosarcinia; o__Methanosarciniales; f__Methanosarcinaceae; g__Methanimicrococcus	0.996474
TACCGGTGGCCCGAGTGGTAGCCACTTTTATTTGGTCTAAAGGGTCCGTAGCCGGTTTAGTCAGTCCATTGGGAAATCCAGATGCTTAACATTTGGGCTA	d__Archaea; p__Halobacterota; c__Methanosarcinia; o__Methanosarciniales; f__Methanosarcinaceae; g__Methanimicrococcus	0.997294
TACCGGTGGCCCGAGTGGTAGCCACTTTTATTTGGTCTAAAGGGTCCGTAGCCGGTTTAGTCAGTCCATTGGGAAATCCAGGTGCTTAACATTTGGGCTA	d__Archaea; p__Halobacterota; c__Methanosarcinia; o__Methanosarciniales; f__Methanosarcinaceae; g__Methanimicrococcus	0.996747
TACCGGTGGCCCGAGTGGTAGCCACTTTTATTTGGTCTAAAGGGTCCGTAGCCGGTTTGGTCAGTCCATTGGGAAATCCAGATGCTTAACATCTGGGCTA	d__Archaea; p__Halobacterota; c__Methanosarcinia; o__Methanosarciniales; f__Methanosarcinaceae; g__Methanimicrococcus	0.991868
TACCGGTGGCCCGAGTGGTAGCCACTTTTATTTGGTCTAAAGGGTCCGTAGCCGGTTTGGTCAGTCCATTGGGAAATCCAGATGCTTAACATTTGGGCTA	d__Archaea; p__Halobacterota; c__Methanosarcinia; o__Methanosarciniales; f__Methanosarcinaceae; g__Methanimicrococcus	0.994289
TACCGGTGGCCCGAGTGGTAGCCACTTTTATTTGGTCTAAAGGGTCCGTAGCTGGTTTAGTCAGTCCATTGGGAAATCCAGATGCTTAACATTTGGGCTA	d__Archaea; p__Halobacterota; c__Methanosarcinia; o__Methanosarciniales; f__Methanosarcinaceae; g__Methanimicrococcus	0.997879
TACCGGTGGCCCGAGTGGTAGCCACTTTTATTTGTTCTAAAGGGTCCGTAGCCGGTTTAGTCAGTCCATTGGGAAATCCAGATGCTTAACATTTGGGCTA	d__Archaea; p__Halobacterota; c__Methanosarcinia; o__Methanosarciniales; f__Methanosarcinaceae; g__Methanimicrococcus	0.982712
TACCGGTGGCCCGAGTGGTAGCCGCTTTTATTTGGTCTAAAGGGTCCGTAGCCGGTTTAGTCAGTCCATTGGGAAATCCAAATGCTTAACATTTGGGCTA	d__Archaea; p__Halobacterota; c__Methanosarcinia; o__Methanosarciniales; f__Methanosarcinaceae; g__Methanimicrococcus	0.999927
TACCGGTGGCCCGAGTGGTAGCCGCTTTTATTGGGTCTAAAGGGTCCGTAGCCGGTTCGGTCAGTCCATTGGGAAATCCGGATGCTCAACATCCGGGCTT	d__Archaea; p__Halobacterota; c__Methanosarcinia; o__Methanosarciniales; f__Methanosarcinaceae; g__Methanimicrococcus; s__Methanimicrococcus_blatticola	0.771213
TACTGGTGGCCCGAGTGGTAGCCACTTTTATTTGGTCTTAAGGGTCCGTAGCCGGTTTAGTCAGTCCATTGGGAAATCCAGATGCTTAACATTTGGGCTA	d__Archaea; p__Halobacterota; c__Methanosarcinia; o__Methanosarciniales; f__Methanosarcinaceae; g__Methanimicrococcus; s__uncultured_methanogenic	0.771208
CACCAGCGCCTCGAGTGGGGATCGCGATTATTGGGTCTAAAGCGTCCGTAGCAGGCTTTGTAAATGCTTTGTGAAATCGGCAGGCTTAACCTGTCGTCGT	d__Archaea; p__Nanoarchaeota; c__Nanoarchaeia; o__Woesearchaeales; f__Woesearchaeales; g__Woesearchaeales; s__uncultured_euryarchaeote	0.93885
TACCCGCGCCCCAAGTGGTGGTCGATATTATTGAGCCTAAAACGTCCGTAGCCGGTTTTCTAAATCCTTGGGTAAATCGGGCAGCTTAACTGTCCGAATT	d__Archaea; p__Thermoplasmatota; c__Thermoplasmata; o__Methanomassiliicoccales; f__Methanomassiliicoccaceae; g__Methanomassiliicoccus; s__Candidatus_Methanomassiliicoccus	0.952325
TACCCGCAGCCCAAGTGGTGGTCGATATTATTGAGTCTAAAACGTTCGTAGCCGGTTCGCTAAATCCCTGGGTAAATCGGTCAGCTCAACTGACCGACTT	d__Archaea; p__Thermoplasmatota; c__Thermoplasmata; o__Methanomassiliicoccales; f__Methanomethylophilaceae	1
TACCTGCAGCCCAAGTGGTGGTCGATTTTATTGAGTCTAAAACGTTCGTAGCCGGTCTGGTAAATCCTTGGGGAAATCGGGGAGCTCAACTTTCCGAATT	d__Archaea; p__Thermoplasmatota; c__Thermoplasmata; o__Methanomassiliicoccales; f__Methanomethylophilaceae	0.999996
TACCTGCAGCCCAAGTGGTGGTCGATTTTATTGAGTCTAAAACGTTCGTAGCCGGTCTGGTAAATCCTTGGGTAAATCGGGAAGCTCAACTTTCCGAATT	d__Archaea; p__Thermoplasmatota; c__Thermoplasmata; o__Methanomassiliicoccales; f__Methanomethylophilaceae	1
TACCTGCAGCCCAAGTGGTGGTCGATTTTATTGAGTCTAAAACGTTCGTAGCCGGTCTGGTAAATCCTTGGGTAAATCGGGAAGCTTAACTTTCCGACTT	d__Archaea; p__Thermoplasmatota; c__Thermoplasmata; o__Methanomassiliicoccales; f__Methanomethylophilaceae	1
TACCTGCAGCCCAAGTGGTGGTCGATTTTATTGAGTCTAAAACGTTCGTAGCCGGTCTGGTAAATCCTTGGGTAAATCGGGGAGCTCAACTTTCCGAATT	d__Archaea; p__Thermoplasmatota; c__Thermoplasmata; o__Methanomassiliicoccales; f__Methanomethylophilaceae	0.999999
TACCTGCAGCCCAAGTGGTGGTCGATTTTATTGAGTCTAAAGCGTTCGTAGCCGGTCTGGTAAATCCTTGGGTAAATCGGGAAGCTTAACTTTCCGACTT	d__Archaea; p__Thermoplasmatota; c__Thermoplasmata; o__Methanomassiliicoccales; f__Methanomethylophilaceae	0.999998
TACCTGCAGCCCAAGTGGTGGTCGATTTTATTGAGTCTAAAGCGTTCGTAGCCGGTCTGGTAAATCCTTGGGTAAATCGGGAGGCTTAACTTTCCGAATT	d__Archaea; p__Thermoplasmatota; c__Thermoplasmata; o__Methanomassiliicoccales; f__Methanomethylophilaceae	0.999997
TACCTGCAGCCCAAGTGGTGGTCGATTTTATTGAGTCTAAAGCGTTCGTAGCCGGTTTGATAAATCCTTGGGTAAATCGGGAAGCTTAACTTTCCGACTT	d__Archaea; p__Thermoplasmatota; c__Thermoplasmata; o__Methanomassiliicoccales; f__Methanomethylophilaceae	1
TACCTGCAGCCCAAGTGGTGGTCGCTTTTATTGAGTCTAAAACGTTCGTAGCCGGTCTGGTAAATCCTTGGGTAAATCGGGGAGCTCAACTTTCCGAATT	d__Archaea; p__Thermoplasmatota; c__Thermoplasmata; o__Methanomassiliicoccales; f__Methanomethylophilaceae	0.999979
TACCCGCAGCCCGAGTGGTGGTCGATTTTATTGAGTCTAAAACGTTCGTAGCCGGTCTGATAGATCCTTGGGTAAATCGGGGGGCTTAACCTTCCGAATT	d__Archaea; p__Thermoplasmatota; c__Thermoplasmata; o__Methanomassiliicoccales; f__Methanomethylophilaceae; g__Candidatus_Methanomethylophilus; s__Candidatus_Methanomethylophilus	0.998123
TACCCGCAGCCCGAGTGGTGGTCGCTTTTATTGAGTCTAAAACGTTCGTAGCCGGTCTGATAGATCCTTGGGTAAATCGGGGGGCTTAACCTTCCGAATT	d__Archaea; p__Thermoplasmatota; c__Thermoplasmata; o__Methanomassiliicoccales; f__Methanomethylophilaceae; g__Candidatus_Methanomethylophilus; s__Candidatus_Methanomethylophilus	0.997677
TACCCGCAGCCCGAGTGGTGGTCGGTTTTATTGAGTCTAAAACGTTCGTAGCCGGTCTGATAGATCCTTGGGGAAATCGGGGGGCTTAACCTTCCGAATT	d__Archaea; p__Thermoplasmatota; c__Thermoplasmata; o__Methanomassiliicoccales; f__Methanomethylophilaceae; g__Candidatus_Methanomethylophilus; s__Candidatus_Methanomethylophilus	0.998695
TACCCGCAGCCCAAGTGGTGGTCGATTTTATTGAGTCTAAAACGTTCGTAGCCGGTTCATTAAATCCTTGGGTAAATCGGGAAGCTTAACTTTCCGACTT	d__Archaea; p__Thermoplasmatota; c__Thermoplasmata; o__Methanomassiliicoccales; f__Methanomethylophilaceae; g__uncultured	0.720874
TACCTGCAGCCCAAGTGGTGGTCGATTTTATTGAGTCTAAAGCGTTCGTAGCCGGTCCGGTAAATCCTTGGGTAAATCGGGAAGCTTAACTTTCCGACTT	d__Archaea; p__Thermoplasmatota; c__Thermoplasmata; o__Methanomassiliicoccales; f__Methanomethylophilaceae; g__uncultured	0.786391
TACCCGCAGCCCAAGTGGTGGTCGATATTATTGAGTCTAAAACGTTCGTAGCCGGTCCGGTAAATCCCTGGGTAAATCGGTGAGCTTAACTCACCGACTT	d__Archaea; p__Thermoplasmatota; c__Thermoplasmata; o__Methanomassiliicoccales; f__Methanomethylophilaceae; g__uncultured; s__uncultured_Methanomassiliicoccales	0.880594
AAAAAGTTCTAAAGCCTCGCTATGATGAAGATATATAAAGTCTTTTCCTATATAGTTATTGGTGCTGTTATAACCACCCTATTGCTTTTGGCTACATGCA	d__Bacteria	0.728341
AAAAGCCGACGTCGAACGGGCGGTGAAGGCCGCGCGCCAGGCTTTTGATAACGGCGACTGGTCGCAGGCCTCTCCGGCCCGGCGTAAAGCGGTTCTCACT	d__Bacteria	0.916612
AAAAGGACGTTTAAAGTACGTTCTCCGCGATGGTCCAAGCTATACAGGCACCTTTGTAGACAACGAAATATTAGGCGACCGCGAACGACGCGTCATCGAA	d__Bacteria	0.709396
AAAATGCCAGTACAATATATACGGCACCGCTTTTGGAAAAGGCGGCCTCACGCCTGTCGCTGATAATCCGTCGGGCCAGACGGCGCCGCAACAGTTCATA	d__Bacteria	0.837705
AAACAATCCATGTCTGATTGGAGAGCCGGGAGTGGGCAAGACCGCTATAGTAGAAGGACTTGCGCAGGATATAGTCAGTGGCAATGTTCCGGATATTCTT	d__Bacteria	0.888956
AAACGGGGGATACAAGCGTTATCCGGAATTACTGGGCGTAAAGCGTATGTAGGTGGTTTTAATATATTTTTAACTAAATAAAACTATATATGTTTAAAAA	d__Bacteria	0.999577
AAACGGGGGGGGCGAGCGTTATCCATCATTACTGGGCGTTAAGAGTCCGTAGACGGTGTTGTAAGTTTTTTGTGAAATTTTAAGTGATAATCTTAACAAA	d__Bacteria	0.983672
AAAGAAGAGAATGGGCAGATACGAAGGATTTACTCCCGCGTATAAGAAAGCAATCGTACAACTCAAGAAGGACAGCAAGTCCATTGCGTTCTTCGATTCG	d__Bacteria	0.732732
AAAGGGCGACCCATTGGAGTTTTAAATTGGTGTAAAGGATACGTAGCCGGCCGTAAAAATGGCTAGAGTCAAATAGAAGTAATTACAATACCTAGAGTAG	d__Bacteria	0.865938
AAAGTGCTTGACTCCACCTCTTTAAGCTCATTGATACGTTTTTTAATGTCCGATGTGAACATTGCCACATTAGACGGTGGCGTTTCATAGGAAAAGTCGC	d__Bacteria	0.719855
AAATAAGGATAAGCATAAAAGCACCCCCTGTGGTCTGTACGGGCAGACCGCAGGGGGTGCTTGGCTTTTTATACGCGCAGGGAATTAAAGGCACACGTAC	d__Bacteria	0.896522
AAATCATCGGAAATGCCGTCGACCGGCTCCACATAGATGGTAGATTCCTCCGGCCCTTCCGGCATGGGAAACGCAGTAATATCGGTAACATCTGTTGAAG	d__Bacteria	0.760751
AAATCGATTCTTTCGCTTACATGCCGGTACAGGATTTTGGAAATGCATTTTCCACCTTCATTGCCCAAAATTACGGCGCCGGAAAAGAAAAGCGAATTTC	d__Bacteria	0.834618
AAATCTGCTCAAATTTATGCGCGCTTCGATAAAAATGATTGGCGTATCCAACCTGCAGAGTTTTATCGCTTCCATGACGCAGAAGTTAACACTTTCGGAT	d__Bacteria	0.788426
AAATGATTGGCGTATCCAACCTGCAGAGTTTTATCGCTTCCATGACGCAGAAGTTAACACTTTCGGATATTTCTGATGAGTCGAAAAATTATCTTGATAA	d__Bacteria	0.706614
AAATGTGCACCACAAAAAAAGAACGCCGCATTAAAATGAAATATCGCGCCTCGCAGGTAAGCAAGCTCACCAGAATACTTTTTCCCGTGCTTGTTACCAT	d__Bacteria	0.714092
AAATTAACTTTATAACGGCGTAAAGAGTGGTCACATGCTATCCAAGTAGCTAAGATTAAAAAGCAGCTGAGCTGTCATAAGCCCAAGATGCCAATAAGGC	d__Bacteria	0.870738
AAATTAACTTTATAACGGCGTAAAGGGTGGTCACATGCTATCCAAGTAGCTAAGATTAAAAAGCAGCTGAGCTGTCATAAGCCCAAGATGCCAATAAGGC	d__Bacteria	0.891479
AAATTTATGCGCGCTTCGATAAAAATGATTGGCGTATCCAACCTGCAGAGTTTTATCGCTTCCATGACGCAGAAGTTAACACTTTCGGATATTTCTGATG	d__Bacteria	0.799055
AACAAAGTAAAGCTTTAATCCGCACATTCAAAAAAATGAAAGATTACATATTAGAAACCCTGGTAGTCCGGCTGACTGACTTACTGGACGCGAATCTCGT	d__Bacteria	0.808478
AACAAAGTAAAGCTTTAATCCGCACATTCAAAAAAATGAAAGATTACATATTAGATACCCCTGTAGTCCGGCTGACTGACTTACTGGACGCGAATCTCGT	d__Bacteria	0.720866
AACAACGCTCTTCGATGCCATCTATTCTGCACTCTATGGATTGAAGATATCCAACAAGCGACAGTTTGAAGAAATCTTTAATTCGGGCGTAAAGAACGAG	d__Bacteria	0.827771
AACACCTTATCCACGTCCTTATAAGCGAACGATTCGCTCGTGTTGTGAAGGTATTGAACGGAATTACCGCTCGCCTTAGAGAAGAGTTTTTCCGCCAAGC	d__Bacteria	0.922601
AACAGAACAACCCCGGCCAAGCCGACAACTGCTGCGAATAGAGCATAACAACAACCCACAATCCGAATAGCATAATCTGCATCTGAATATCCTGCAGGCG	d__Bacteria	0.789952
AACAGAGGGGGCGAGCGTTGATCATCATGACTGGGCGTAAAGGGTGCGTAGGCGGACATTACAAAAACGGCTTGAGGGGAATGATTGCGTATCGACGCAA	d__Bacteria	0.999636
AACATAGGGGGCAAGCATTGTCCGGAATCACTGGGCGTAAAGGGAGCGTAGGCGGATTTTTAAGTTAAGTGTGAAAGCCTGGGGCTTAACTCCAGAATTG	d__Bacteria	0.999943
AACCAATACCTTGCAAGAACAAGCCCCAACCGAATTTGCTCGGAATAGAGGGGTCTTTCGTTCCCATTTTAAGCCACAGTTTGGCAAACAACGGGGCGAA	d__Bacteria	0.914998
AACCAGCGGTCAGGTGCTGGTGGTGCTGGTGACCGCGCAGGAAAACCTGCCCGGCAGCCGCAATTTTGTGAAAGCCCTGCGGGAAAAGGCCCCCTGGGTG	d__Bacteria	0.92071
AACGAGGGGGACGAGCGTTATTCATCATGACTGGGCGTAAAAGGTTCGTAGACGGTAAAGTAAGTTTCTTGTTAAAGATTAAAGCCTAACTTTTAACCAG	d__Bacteria	0.959013
AACGCCAGGAAGGCTCGAAAAAACTGCCGGAAGAACTGAAAGCGTGCATGGAAGCGTACCATGTGAAGCCGACACTGGCAGACCTCCTCACAGAAAAGGA	d__Bacteria	0.854183
AACGCGAGGGGTAAGCATTATTCAGCATTAATGGGTCTAAAGGGTACGTAGGCGGTTTCACAAAACTTTACTTGTTTAAAATCAAACCAATATAAACATT	d__Bacteria	0.867237
AACGGAGAGAGCGAGCGTTATTCGTAGTGATTGGGCGTAAAGGGTACGTAGACGGTCAAGGAAAGTTCATAATTAAAATCCATGGTAGCACCGTGGTAGT	d__Bacteria	0.985728
AACGGAGGGAGCTAGTGTTATTACGTTGACTGGGCGTAGGGTACGTAGGTGGTGAAATGAAAAAAGATGAAATACTAGGTTACCATCTTTTCTGTTTTTT	d__Bacteria	0.983944
AACGGAGGGAGCTAGTGTTATTATGATGACTGGGCGTAGGGTACGTAGGTGGTGAAACAAAGTAAAAATGAAATACTAGATTATCATCTTTTGTGTTTTT	d__Bacteria	0.954115
AACGGAGGGAGCTAGTGTTATTATGTTGACTGGGCGTAGGGTACGTAGGTGGTGAAATGAAAAAAAAAATGAAATACTAGGTTATCATCTTTTCTGTTTT	d__Bacteria	0.946374
AACGGAGGGAGCTAGTGTTATTATGTTGACTGGGCGTAGGGTACGTAGGTGGTGAAATGAAAAAAAAATGAAATACTAGGTTATCATCTTTTCTGTTTTT	d__Bacteria	0.930887
AACGGAGGGAGCTAGTGTTATTATGTTGACTGGGCGTAGGGTACGTAGGTGGTGAAATGAAAAAAAATGAAATACTAGGTTATCATCTTTTCTGTTTTTT	d__Bacteria	0.950805
AACGGAGGGAGCTGGTGTTATTATGATGACTGGGCGTAGGGTACGTAGGTGGTGAAACAAAGTAAAAATGAAACACTAGATTATCATCTTTTGTGTTTTT	d__Bacteria	0.951375
AACGGAGGGAGTGAGTGTTATCCGTCAAAACTGGGCGTAAAGGGTATGTAGGCTGTTTATAATGTGGAAATAAAAGTCTAAAGAACAACTTTATATAATT	d__Bacteria	0.984462
AACGGAGGGGGCAAGTGTTACTCGTAAGGACTGGGCGTAAAGGGTTCGTAGGCGGTTTGTAGTAAGTTAGGTGTTAAATAGTAAGGTTCAAACTTATTTT	d__Bacteria	0.996172
AACGGAGGGGGCAAGTGTTATTCGTGGTGACTGGGCGTAAAGGGTACGTAGGTGGTAACTGTTGAATTTAGGTAGAAACACTGGGGATTCACTCCATTAG	d__Bacteria	0.994841
AACGGAGGGGGCTAGTGTTACTCAACTTGACTGGGCGTAAAGGGCGTGAAGGTGGTACAGTACGTTTTTTTGTAAAAACTCAAACATAATTTGAGGATCT	d__Bacteria	0.988925
AACGGAGGGGGCTAGTGTTACTCAACTTGACTGGGCGTAAAGGGCGTGAAGGTGGTATAGTACGTTTTTCTGTAAATACTCAAGCATAACTTGAGGAACA	d__Bacteria	0.992536
AACGGAGGGGGCTAGTGTTATTCGTGATGACTGGGCGTAGGGTACGTAGGCGGATATTTAAAAATGTAGTAAAAGACTGAGGAAGAACCTCTTAAATCTA	d__Bacteria	0.989884
AACGGAGGGGGCTAGTGTTATTCGTGTTGACTGGGCGTAAAGGGTACGTAGGTGGCGAAGTGAGCTTTAAGTCAAAAACTGGCGTTGCGTCTTTTCGGCT	d__Bacteria	0.99713
AACGGATGGGGCTAGTGTTATTCGTCGTTATTGGGCGTAAAGGGCATGTAGGCGGTGTGTGAATCTTTTCATTGAAAGTATAGAGCTTAACTCTATGGTC	d__Bacteria	0.996036
AACGGGGGAGACTAGTGTTATTCGTGATGACTGGGCGTAAAGGGTATGTGGTGGTAAATAAAAAATAGATGCAAAAACTGGAGATAACCTTCTTTAAAGT	d__Bacteria	0.90194
AACGGGGGAGACTAGTGTTATTCGTGATGACTGGGCGTAAAGGGTATGTGGTGGTAAATAAAAAATGGATGCAAAAACTGGAGATAACCTTCTTTAAAGT	d__Bacteria	0.854803
AACGGGGGATACAAGCGTTATCCGAAATTACTGGGCGTAAAGCGTATGTAGGTGGTTTAATATATTTTTAAATAAAGAAAACTATATATGTTTTAAATAA	d__Bacteria	0.997726
AACGGGGGATACAAGCGTTATCCGGAATTACTGGGCGTAAAGCGTATGTAGGTGGTTTAATATATTTTTAAATAAATAAAACTATATATGTTTTAAATAA	d__Bacteria	0.999455
AACGGGGGATACAAGCGTTATCCGGAATTACTGGGCGTAAAGCGTATGTAGGTGGTTTTAATATATTTTAAATAAATAAAACTATATATGTTTTAAATAA	d__Bacteria	0.999461
AACGGGGGATACAAGCGTTATCCGGAATTACTGGGCGTAAAGCGTATGTAGGTGGTTTTAATATATTTTTAAATAAATAAAACCATATATGTTTTAAATA	d__Bacteria	0.999366
AACGGGGGATACAAGCGTTATCCGGAATTACTGGGCGTAAAGCGTATGTAGGTGGTTTTAATATATTTTTAAATAAATAAGACTATATATGTTTTAAATA	d__Bacteria	0.999526
AACGGGGGATACAAGCGTTATCCGGAATTACTGGGCGTAAAGCGTATGTAGGTGGTTTTAATATATTTTTAACTAAATAAAACTATATATGTTTAAAAAA	d__Bacteria	0.999584
AACGGGGGATACAAGCGTTATCCGGAATTACTGGGCGTAAAGCGTATGTAGGTGGTTTTAATATATTTTTAACTAAATAAAACTATATATGTTTTAAAAA	d__Bacteria	0.999438
AACGGGGGATACAAGCGTTATCCGGAATTACTGGGCGTAAAGCGTATGTAGGTGGTTTTAATATATTTTTTACTAAATAAAACTATATATGTTTTAAAAA	d__Bacteria	0.999513
AACGGGGGATACAAGCGTTATCCGGAATTACTGGGCGTAAAGTGTATGTAGGTGGTTTAATATATTTTTAAATAAAGAAAACTATATATGTTTTAAATAA	d__Bacteria	0.999319
AACGGGGGATACAAGCGTTATCCGGAATTACTGGGCGTAAAGTGTATGTAGGTGGTTTAATATATTTTTAATTAAAGTTAACTATATATGTTTCTATTAA	d__Bacteria	0.998845
AACGGGGGATACAAGCGTTATCCGGAATTACTGGGCGTAAAGTGTATGTAGGTGGTTTAGTATATTTTTAATTAAATTTAACTATATATATGTTTTTGTT	d__Bacteria	0.99914
AACGGGGGATACAAGCGTTATCCGGAATTACTGGGCGTAGAGCGTATGTAGGTGGTTTTAATATATTTTTAAATAAATAAAACTATATATGTTTTAAATA	d__Bacteria	0.997563
AACGGGGGGAACGAGTGTTATTCATCATAACTGGGCGTAAAGGGCGCGTAGATGGCATTATCAGTGTTGAATAAACTTGGAATGAAGTTTTTCTTTCATA	d__Bacteria	0.986086
AACGGGGGGAGCGAGTGTTACTCTACATGACTGGGCGTAAAGGGTTCGTAGGCGGTTGCTCAAGTAGATAGAAAAATTCCTGCGCTGATGCAGGGTAGTT	d__Bacteria	0.996521
AACGGGGGGAGCTAGTGTTATCGTCTTGACTGGGCGTAAAGGGTATGTAGGTGATAGATAAAAGTTAATTTAACTACTTGACACGAGTATTTTGTATTAT	d__Bacteria	0.921259
AACGGGGGGAGCTAGTGTTATTATGTTGACTGGGCGTAGGGTATGTAGGTGGTGAAAAAATGAGAAATTTAAATACTAGGTAATTATCTTTTATGTTTTC	d__Bacteria	0.85719
AACGGGGGGGCAAGCGTTATCCATCATTACTGGGCGTTAAGAGTCCGTAGACGGTGTAATAAGTTTTTTGTGAAATTTTAAGTGATAATCTTAACAAAGT	d__Bacteria	0.989461
AACGGGGGGGCAGGTGTTACTCATCTTTACTGGGCGTAAAGGGTGTGTAGGTGGTTTTATGCTGTTTTTAACAAAATCTTATGGTAAGCTAAAATTCGTT	d__Bacteria	0.950455
AACGGGGGGGGACAAGCGTCATTCGTCAGGACTGGGTGTAAAGGATCTGTAGATTGCCGCGAGACAGTTTGGAAACGAAACGCTTTAGGCTCAACCTTTT	d__Bacteria	0.803908
AACGGGGGGGGCAAGCGTTATCCATCATTACTGGGCGTTAAGAGTCCGTAGACGGTGTAATAAGTTTTTTGTGAAATTTTAAGTGATAATCTTAACAAAG	d__Bacteria	0.988305
AACGGGGGGGGCAAGCGTTATCCATCATTACTGGGCGTTGAGAGTCCGTAGACGGTGTAATAAGTTTTTTGTGAAATTTTAAGTGATAATCTTAACAAAG	d__Bacteria	0.990971
AACGGGGGGGGCAAGCGTTATTCGTCGTGACTGGGCGTAAAGGGTTCGTAGACGGTTTGCAACTATTTTCGGCGACATTTCGTAAATTATTACATTTTGC	d__Bacteria	0.98935
AACGGGGGGGGCAAGTGTTACTCATGATAATTGGGCGTAAAGGGTGCGTAGGTGGTTTTTTAAGTTAAAAATTAAATATTATGTATAAATAATCTGTTTT	d__Bacteria	0.998026
AACGGGGGGGGCAAGTGTTATTCATCCTTATTGGGCGTAGAGGGCATGTAGGCGGTTTATTTTGTTTTTAGCAAAATGCTTTAGCTTAACTAAAGTTTTG	d__Bacteria	0.971945
AACGGGGGGGGCAGGTGTTACTCATCTTTACTGGGCGTAAAGGGTGTGTAGGTGGTTTTATGCTGTTTTTAACAAAATCTTATGGTAAGCTAAAATTCGT	d__Bacteria	0.948018
AACGGGGGGGGCAGTGTTATTCGTGATGACTGGGCGTAGGGTACGTAGGTGGATAATTAAAAATACAGTAAAAAACTGAGGTTAACCCTCTTTAATCTGC	d__Bacteria	0.949523
AACGGGGGGGGCGAGCGTTATCCATCATTACTGGGCGTTAAGAGTCCGTAGACGGTGTTGTAAGTTTTTTGTGAAATTTTAAGTGATAATCTTAACAAAG	d__Bacteria	0.982667
AACGGGGGGGGCTAGTGTTATTCGTGATGACTGGGCGTAGGGTGCGTCGGTGGGTAGTTAAAAATAGAGTAAAAGACTGAGGATGGACCTCTTTCATCTG	d__Bacteria	0.911509
AACGGGGGGGGCTTAGTGTTATTCGTGATGACTGGGCGTAGGGTATGTAGGCGGTAAATTAAAAGTAGAGTAAAAGACTGAAGCAGACCTTCTTTACTCT	d__Bacteria	0.926402
AACGGGGGGGGGACAAGCGTCATTCGTCAGGACTGGGTGTAAAGGATCTGTAGATTGCCGCGAGACAGTTTGGAAACGAAACGCTTTAGGCTCAACCTTT	d__Bacteria	0.796465
AACGGGGGGGGGCAAGCGTTATCCATCATTACTGGGCGTTAAGAGTCCGTAGACGGTGTAATAAGTTTTTTGTGAAATTTTAAGTGATAATCTTAACAAA	d__Bacteria	0.986896
AACGGGGGGGGGCAGGTGTTACTCATCTTTACTGGGCGTAAAGGGTGTGTAGGTGGTTTTATGCTGTTTTTAACAAAATCTTATGGTAAGCTAAAATTCG	d__Bacteria	0.921143
AACGGGGGGGGTAGTGTTATTCGTGATGACTGGGCGTAGAGTACGTAGGTGGATAATTAAAAATACAGTAAAAAACTGAGGTTAACCCTCTTTAATCTGC	d__Bacteria	0.978303
AACGGGGGGGGTAGTGTTATTCGTGATGACTGGGCGTAGGGTACGTAGGTGGATAATTAAAAATACAGTAAAAAACTGAGGTTAACCCTCTTTAATCTGC	d__Bacteria	0.969625
AACGGGGGGGGTAGTGTTATTCGTGGTGACTGGGCGTAGGGTACGTAGGTGGAGTATTAAAAATTTTGTAAAAAACTGAGGTGACCCCTCTTTAATCAAA	d__Bacteria	0.895128
AACGGTGAATATCCTTACCATCAACAAAGGCTTTAATCAAAGCTTCATCACCAGAAAGATGAGCTAAAATACGTAACTCAATTTGAGAATAATCGGCACT	d__Bacteria	0.741027
AACGTAGGACACAAGCGTTGTCCGGAATTACTGGGCGTAAAGGGCTCGTAGGCGGTTTATTAAGTTTAAGATTAAAGCCCGGGGCTCAACTCCGGTAAGT	d__Bacteria	0.999976
AACGTAGGGGGCGAGCGTTATCCGGATTTATTGGGCGTAAAGCGTGTGTAGGCGGTTTGTTAAGTCAGATGTGAAATCCCCGGGCTCAACCTGGGAACTG	d__Bacteria	1
AACGTAGGGGGCGAGCGTTGTCCGGAATCACTGGGCTTAAAGAGCAGGGAGGCGGAAGAGAGGAGTGCGAGCGAAAAGCCCGAGGGAGACTCGGGGGAGC	d__Bacteria	0.999298
AACGTAGGGTGCAAGCGTTGTCCGGAATTACTGGGTGTAAAGGGTGCGTAGGCGGCTTTGCAAGTCAGTTGTGAAAGTTTGCGGCTCAACCGTAAAATTG	d__Bacteria	0.999991
AACGTAGGTCAAAAGCGTTGTCCGGAATTACTGGGTGTAAAGGGAGCGTAGGCGGACTATTAAGTGAGCTGTGAAAGTTTGCGGCTCAACCGTAAAATTG	d__Bacteria	0.999992
AACGTAGGTCACAAGCGTTATCCGGATTTACTGGGTGTAAAGGGTGCGTAGGCGGCCTTTTAAGTCAGCGGTGAAAGTCTGTGGCTCAACCCCGGGACTG	d__Bacteria	1
AACGTAGGTCACAAGCGTTGCCCGGAATTACTGGGTGTAAAGGGAGCGCAGGCGGGTTGTTAAGTCAGTTGTGAAAGTTTGCGGCTCAACCGTAAAATTG	d__Bacteria	0.999983
AACGTAGGTCACAAGCGTTGTCAAACGGTACCGCCTCGTCCTCAAAGCCGTAATAAAGCTGAGGAATTATCCAGTCACAATATCCACGCTCGGAGCACCA	d__Bacteria	0.922372
AACGTAGGTCACAAGCGTTGTCCGGAATTACTGGGTGTAAAGGGAGCATAGGCCGGAGATTAAGCGTGTTGTGAAATGTAGACGCTCAACGTCTGCACTG	d__Bacteria	0.999975
AACGTAGGTCACAAGCGTTGTCCGGAATTACTGGGTGTAAAGGGAGCGCAGGCCGGAGATTAAGCGTGTTGTGAAATGTAGATGCTCAACATCTGCACTG	d__Bacteria	0.999996
AACGTAGGTCACAAGCGTTGTCCGGAATTACTGGGTGTAAAGGGAGCGCAGGCCGGAGATTAAGCGTGTTGTGAAATGTAGATGCTCAACGTCTGCACTG	d__Bacteria	0.999996
AACGTAGGTCACAAGCGTTGTCCGGAATTACTGGGTGTAAAGGGAGCGCAGGCGGACGCTTAAGTCAGTTGTGAAAGTTTGCGGCTCAACCGTAAAATTG	d__Bacteria	0.999999
AACGTAGGTCACAAGCGTTGTCCGGAATTACTGGGTGTAAAGGGAGCGCAGGCGGTCTGTCAAGTCGGATGTGAAATCCCCGGGCTCAACCTGAGAACTG	d__Bacteria	0.999999
AACGTAGGTCACAAGCGTTGTCCGGAATTACTGGGTGTAAAGGGAGCGCAGGCGGTCTGTCAAGTCGGATGTGAAATCCCCGGGCTCAACCTGGGAACTG	d__Bacteria	1
AACGTAGGTCACAAGCGTTGTCCGGAATTACTGGGTGTAAAGGGAGCGCAGGCGGTGACTTAAGTGAGATGTGAAAGCCCCGGGCTTAACCTGGGAATTG	d__Bacteria	0.999998
AACGTAGGTCACAAGCGTTGTCCGGAATTACTGGGTGTAAAGGGAGCGCAGGTGGACAGTTAAGTCAGTTGTGAAAGTTTGCGGCTCAACCGTAAAATTG	d__Bacteria	0.999986
AACGTAGGTCACAAGCGTTGTCCGGAATTACTGGGTGTAAAGGGAGCGCAGGTGGACGCTTAAGTCAGTTGTGAAAGTTTGCGGCTCAACCGTAAAATTG	d__Bacteria	0.99999
AACGTAGGTCACAAGCGTTGTCCGGAATTACTGGGTGTAAAGGGAGCGCAGGTGGACTGGTAAGTCAGTTGTGAAAGTTTGCGGCTCAACCGTAAAATTG	d__Bacteria	0.999988
AACGTAGGTCACAAGCGTTGTCCGGAATTACTGGGTGTAAAGGGAGCGCAGGTGGGTTGTTAAGTCAGTTGTGAAAGTTTGCGGCTCAACCGTAAAATTG	d__Bacteria	0.999981
AACGTAGGTCACAAGCGTTGTCCGGAATTACTGGGTGTAAAGGGAGCGCGGGCGGTTGAGTAAGACAGATGTGAAATCCCCGAGCTTAACTCGGGAATGG	d__Bacteria	0.999995
AACGTAGGTCACAAGCGTTGTCCGGAATTACTGGGTGTAAAGGGAGCGTAGACGGGTTTTTAAGTCAGCTGTGAAAGTTTGGGGCTCAACCTTAAAATTG	d__Bacteria	0.999995
AACGTAGGTCACAAGCGTTGTCCGGAATTACTGGGTGTAAAGGGAGCGTAGGCCGGAGATCAAGCGTGTTGTGAAATGTAGATGCTCAACATCTGCACTG	d__Bacteria	0.999987
AACGTAGGTCACAAGCGTTGTCCGGAATTACTGGGTGTAAAGGGAGCGTAGGCCGGAGATTAAGCGTGTTGTGAAATACTGTCGCTCAACGACAGAGGTG	d__Bacteria	0.999965
AACGTAGGTCACAAGCGTTGTCCGGAATTACTGGGTGTAAAGGGAGCGTAGGCCGTCTGGTAAGCGTGTTGTGAAATGTCGGGGCTCAACCTGGGCATTG	d__Bacteria	0.999993
AACGTAGGTCACAAGCGTTGTCCGGAATTACTGGGTGTAAAGGGAGCGTAGGCCGTCTGTTAAGCGTGTTGTGAAATGTCGGGGCTCCACCTGGGCATTG	d__Bacteria	0.999968
AACGTAGGTCACAAGCGTTGTCCGGAATTACTGGGTGTAAAGGGAGCGTAGGCCGTGAGGTAAGCGTGTTGTGAAATGTAGGCGCCCACCGTCTGCACTG	d__Bacteria	0.999987
AACGTAGGTCACAAGCGTTGTCCGGAATTACTGGGTGTAAAGGGAGCGTAGGCCGTTTGGTAAGCGTGTTGTGAAATGTCGGGGCTCACCCTGGGCATTG	d__Bacteria	0.999984
AACGTAGGTCACAAGCGTTGTCCGGAATTACTGGGTGTAAAGGGAGCGTAGGCCGTTTGGTAAGCGTGTTGTGAAATGTCGGGGCTCCACCTGGGCATTG	d__Bacteria	0.999972
AACGTAGGTCACAAGCGTTGTCCGGAATTACTGGGTGTAAAGGGAGCGTAGGCCGTTTGTTAAGCGTGTTGTGAAATGTCGGGGCTCAACCTGGGCATTG	d__Bacteria	0.999992
AACGTAGGTCACAAGCGTTGTCCGGAATTACTGGGTGTAAAGGGAGCGTAGGCGGGATGGTAAGTCAGTTGTGAAAGTTTGCGGCTCAACCGTAAAATTG	d__Bacteria	0.999993
AACGTAGGTCACAAGCGTTGTCCGGAATTACTGGGTGTAAAGGGAGCGTAGGCGGGCTGTTAAGTCAGCGGTCAAATGTCAGGGCCCCACCTTGGCATGC	d__Bacteria	0.999981
AACGTAGGTCACAAGCGTTGTCCGGAATTACTGGGTGTAAAGGGAGCGTAGGCGGGTTGTTAAGTCAGTTGTGAAAGTTTGCGGCTCAACCGTAAATTGC	d__Bacteria	0.999992
AACGTAGGTCACAAGCGTTGTCCGGAATTACTGGGTGTAAAGGGAGCGTAGGCTGGAGATTAAGCGTGTTGTGAAATGTAGACGCTCAACGTCTGCACTG	d__Bacteria	0.999985
AACGTAGGTCACAAGCGTTGTCCGGAATTACTGGGTGTAAAGGGAGCGTAGGTGGATAGTAAAGTCAGTTGTGAAAGTTTGCGGCTCAACCGTAAAATTG	d__Bacteria	0.999994
AACGTAGGTCACAAGCGTTGTCCGGAATTACTGGGTGTAAAGGGCATGTAGGCGGTTACGCAAGCCTGGCGTGAAATCCCGGGGCCCAACCCCGGAACCG	d__Bacteria	0.999923
AACGTAGGTCACAAGCGTTGTCCGGAATTACTGGGTGTAAAGGGCGCGTAGGCGGGGCGTCAAGTCAGCGGTAAAAGACTGCAGCTAAACTGTAGCACGC	d__Bacteria	0.999983
AACGTAGGTCACAAGCGTTGTCCGGAATTACTGGGTGTAAAGGGCGCGTAGGCGGTTTGATAAGTTAGAGGTGAAATCCCGGGGCTTAACTCCGGAACTG	d__Bacteria	0.999966
AACGTAGGTCACAAGCGTTGTCCGGAATTACTGGGTGTAAAGGGCGTGTAGGCGGTTCATCAAGTAGGATGTGAAATCCCCGGGCTCAACCTGGGAACAG	d__Bacteria	0.999991
AACGTAGGTCACAAGCGTTGTCCGGAATTACTGGGTGTAAAGGGTGCGTAGGCGGAAGAATAAGTCAGCGGTGAAATGCTTCGGCTCAACTGGAGAATTG	d__Bacteria	0.999997
AACGTAGGTCACAAGCGTTGTCCGGAATTACTGGGTGTAAAGGGTGCGTAGGCGGCCTTTTAAGTCAGCGGTGAAAGTCTGTGGCTCAACCCTAGAATTG	d__Bacteria	0.999996
AACGTAGGTCACAAGCGTTGTCCGGAATTACTGGGTTTAAAGGGAGCGCAGGCCGGGTATTAAGCGTGTTGTGAAATGTAGGCGCCCAACGTCTGCACCG	d__Bacteria	0.99996
AACGTAGGTCACAAGCGTTGTCCGGAATTATTGGGCGTAAAGAGCATGTAGGCGGTTCATCAAGTAGGATGTGAAATCCCCGGGCTCAACCTGGGAACAG	d__Bacteria	0.999989
AACGTAGGTCACAAGCGTTGTCCGGAATTATTGGGCGTAAAGGGCTCGTAGGCGGGTTGTTAAGTCAGTTGTGAAAGTTTGCGGCTCAACCGTAAAATTG	d__Bacteria	0.999969
AACGTAGGTCACAAGCGTTGTCCGGAATTATTGGGTGTAAAGGGTGCGTAGACGGGAGAACAAGTTAGTTGTGAAAGTTTGCGGCTCAACCGTAAAATTG	d__Bacteria	0.999756
AACGTAGGTCACAAGCGTTGTCCGGAATTATTGGGTTTAAAGGGCATGCAGGCGGTTCATCAAGTAGGATGTGAAAGCCCCGGGCTCAACCTGGGAATTG	d__Bacteria	0.999914
AACGTAGGTCACAGGCGTTGTCCGGAATTACTGGGTGTAAAGGGAGCGCAGGCGGGTTGTTAAGTCAGTTGTGAAAGTTTGCGGCTCAACCGTAAAATTG	d__Bacteria	0.999973
AACGTAGGTCACCCGCGTTGTCCGGCCTTACTGGGTGTCCCGGGGGCGCCGGCGGGCCGCCCCGTTGGCCGTGGGGTTGCTGGGCTCCCCCCCTGCCCTG	d__Bacteria	0.854823
AACGTAGGTCACCGTACGTCTTATTATACGTGGTATCACCCGTGATAATAATCGGCTCACCCATTATATCTATAGTAAGTTCACCAGTTACCCCGCTGCC	d__Bacteria	0.874919
AACGTAGGTCACGAGCGTTGTCCGGAATTACTGGGTGTAAAGGGAGCGCAGGCGGTTCATCAAGTAGGATGTGAAATCCCCGGGCTCAACCTGGGAACAG	d__Bacteria	0.999992
AACGTAGGTCCCAAGCGTTGTCCGGAATTACTGGGTGTAAAGGGAGCGCAGGCGGGAGATTAAGCGTGTTGTGAAATGTAGATGCTCAACGTCTGCACTG	d__Bacteria	0.999986
AACGTAGGTCCCAAGCGTTGTCCGGAATTACTGGGTGTAAAGGGAGCGCAGGCGGTTCATCAAGTAGGATGTGAAATCCCCGGGCTCAACCTGGGAACAG	d__Bacteria	0.999995
AACGTGGGAGGCAAGCGTTATTGATCTTAAATGGGTCTAAAGGGTCCGTAAAACGGTAAATTAAGCGAAGATTTTAAGATACTATCGAACTAATTTACTA	d__Bacteria	0.932293
AACGTGGGAGGCAAGCGTTATTGATCTTAAATGGGTCTAAAGGGTCCGTAAAACGGTAAATTAAGCGAAGATTTTAAGATACTGTCGAACTAATTTACTA	d__Bacteria	0.925543
AACGTGGGAGGCAAGCGTTATTGATCTTAAATGGGTCTAAAGGGTCCGTAAAACGGTAAATTGAGCGAAGATTTTAAGATGCTATCGAACTAATTTACTA	d__Bacteria	0.925615
AACGTGGGAGGCAAGCGTTATTGATCTTAAATGGGTCTAAAGGGTCCGTAAAACGGTAGATTAAGCGTAATATTTAAAAATAAAAATCGAACTAATCTAC	d__Bacteria	0.85851
AACGTGGGAGGCAAGCGTTATTGATCTTAAATGGGTCTAAAGGGTCCGTAAAACTGTAAATTAAGCGATAAGGTAAAGCTTATAATCGAACTGATTTACT	d__Bacteria	0.915945
AACGTGGGAGGCAAGCGTTATTGATCTTAAATGGGTCTAAAGGGTCCGTAAAGCTGTAAATTAAGCGATAAGGTAAAGCTTATAATCGAACTGATTTACT	d__Bacteria	0.915496
AACGTGGGAGGCAAGCGTTATTGATCTTAAATGGGTCTAAAGGGTCCGTAGAACTGTAAATTAAGCGATAAGGTAAAGCTTATAATCGAACTGATTTACT	d__Bacteria	0.930928
AACGTGGGGGGCAAGCGTTATTGATCTTAAATGGGTCTAGAGGGTCCGTAAAACGGTAGATTAAGCGTAATATTTAAAAATAAAAATCGAACTAATCTAC	d__Bacteria	0.897868
AACGTTCTTATATTTATGGAAAAGCGTGGTTCGTGATATCACCGAAAAAAGATTTTGGATTCGTGAAATAATACAGGAACAAAAGAACTATCAGATAGAA	d__Bacteria	0.898746
AACTCCAGGAATTGGGAATCTCAGCCAAACTCTCCCCGGAAAGCATGGCTATGACCGATTATTGGTCAAGAGAACTAAAAGAGAACCCTTGTCTCATTGA	d__Bacteria	0.731615
AACTGCCGGCAATCAGATTATGCACCATGGCAATTCCCTGCGCGGCAAACCGAATTGAGCGTTCAGAAAGGAACAGGTTGTTGTCAATCAGCGTTGGACC	d__Bacteria	0.815863
AACTTTATAACGGCGTAAAGAGTGGTCACATGCTATCCAAGTAGCTAAGATTAAAAAGCAGCTGAGCTGTCATAAGCCCAAGATGCCAATAAGGCCTCCA	d__Bacteria	0.873707
AAGAATCAATTACAAAGAACCAGTGGAAAGTCAGGGAGGATGATTACTGCGTTCTTAATTATGATGATAAGGTGCTCAGGGAATTTGGTAAAACAATAAA	d__Bacteria	0.814035
AAGACAGAAAGGGCGACCCATTGGAATTATAAATTGGTGTAAAGGATACGTAGCCGGCCGTAAAAATGGCTAGAGTCAAATAGAAGTGATTACAATACCT	d__Bacteria	0.959024
AAGACGGAAAAATATGTGTCCTTTTCAGAGCAGAGGACAACTCCGCCACCGGCATCGGCAAAAGGACTTCCAGAATAGGTCTCGCCGAGAGCACAGATGG	d__Bacteria	0.735756
AAGCAGCTGAAATCCTCGATATTACCTTAACTAAAAGAGGAAACGCGAATGGCCAACCAATTCCATTAGCCGGTGTGCCATTTCATGCCGTTGATACATA	d__Bacteria	0.867757
AAGCCACAATGTAATTCCCAGACAGACCAGATTGATGCTGCATCCAAGCCACGGTGACAATGTTCCCCGAAAGACAGAACTCATGGTATGCAGCAGCATA	d__Bacteria	0.922646
AAGGAAGTACAAGACGTACCAGACGGCTCTTTTTTTCCTTTGCTTTCTCTTTAATCGGAATCACTGTCTTTAATGCCTGGTTCATGGTTCCGCCATAATT	d__Bacteria	0.805421
AAGGCGCCTATGTAGGTTTTGACGGAGACGAGAAAAATGTGTCATTAAATCCGTTTGATTGTGCCAATACACCGGAAAACCGCTCATTTTTACGCCGTTG	d__Bacteria	0.725996
AAGGCTAAGCACAAAATAAGGAGAATACCCAAATGGCAATGAACACGCTATTAGAAACCCCAGTAGTCCGGCTGACTGACTTAAGCGCAGCACATCTCGT	d__Bacteria	0.774829
AAGGCTAAGCACAAAATAAGGAGAATACCCAAATGGCAATGAACACGCTATTAGAAACCCCGGTAGTCCGGCTGACTGACTGTAGACTGCGTGATCTCGT	d__Bacteria	0.759173
AAGGCTAAGCACAAAATAAGGAGAATACCCAAATGGCAATGAACACGCTATTAGAAACCCCGGTAGTCCGGCTGACTGACTTAAGCGCAGCACATCTCGT	d__Bacteria	0.819333
AAGGCTAAGCACAAAATAAGGAGAATACCCAAATGGCAATGAACACGCTATTAGAAACCCGAGTAGTCCGGCTGACTGACTTAAGCGCAGCACATCTCGT	d__Bacteria	0.81843
AAGGCTAAGCACAAAATAAGGAGAATACCCAAATGGCAATGAACACGCTATTAGAAACCCGGGTAGTCCGGCTGACTGACTGTAGACTGCGTGATCTCGT	d__Bacteria	0.755915
AAGGCTAAGCACAAAATAAGGAGAATACCCAAATGGCAATGAACACGCTATTAGAAACCCTAGTAGTCCGGCTGACTGACTTAAGCGCAGCACATCTCGT	d__Bacteria	0.808985
AAGGCTAAGCACAAAATAAGGAGAATACCCAAATGGCAATGAACACGCTATTAGAAACCCTGGTAGTCCGGCTGACTGACTTAAGCGCAGCACATCTCGT	d__Bacteria	0.807323
AAGGCTAAGCACAAAATAAGGAGAATACCCAAATGGCAATGAACACGCTATTAGAAACCCTTGTAGTCCGGCTGACTGACTGTAGACTGCGTGATCTCGT	d__Bacteria	0.743617
AAGGCTAAGCACAAAATAAGGAGAATACCCAAATGGCAATGAACACGCTATTAGAAACCCTTGTAGTCCGGCTGACTGACTTAAGCGCAGCACATCTCGT	d__Bacteria	0.802213
AAGGCTAAGCACAAAATAAGGAGAATACCCAAATGGCAATGAACACGCTATTAGATACCCCAGTAGTCCGGCTGACTGACTTAAGCGCAGCACATCTCGT	d__Bacteria	0.734311
AAGGCTAAGCACAAAATAAGGAGAATACCCAAATGGCAATGAACACGCTATTAGATACCCGAGTAGTCCGGCTGACTGACTGTAGACTGCGTGATCTCGT	d__Bacteria	0.727292
AAGGCTAAGCACAAAATAAGGAGAATACCCAAATGGCAATGAACACGCTATTAGATACCCGAGTAGTCCGGCTGACTGACTTAAGCGCAGCACATCTCGT	d__Bacteria	0.793855
AAGGCTAAGCACAAAATAAGGAGAATACCCAAATGGCAATGAACACGCTATTAGATACCCGGGTAGTCCGGCTGACTGACTGTAGACTGCGTGATCTCGT	d__Bacteria	0.724739
AAGGCTTCTGTACAGAGCCCGGCTCATATGTATGGGTAACACAGAAATTCTGCCACAGCTTATTTAATGCATCCATCTCCTGAGTGCTGTCCTCTTTAAA	d__Bacteria	0.777864
AAGGGCGACCCATTGGAGTTTTAAATTGGTGTAAAGGATACGTAGCCGGCCGTAAAAATGGCTAGAGTCAAATAGAAGTAATTACAATACCTAGAGTAGG	d__Bacteria	0.862676
AAGGGGCAAGCGTTACTCGTACGTATTGGGCGTAAGGCGTCTGTAGGTGGTTATGATCAATAACTCATTTCTAGATTAGATAAAGATTTTCTTTGAGTAA	d__Bacteria	0.991288
AAGGGGGCGGGCGTTACCCATGATGACTGGGCGTAAAGAGTCCGTAGGCAGCTTTTCAAGTTAAAAGTAAAATCAAAAAGCTTAACTTTTTGAGGCTTTT	d__Bacteria	0.970494
AAGGTGATTTTAAAGAATTTATAACTGATACTTCAAACAAATACGGTCAAGTAAATGCAAGCACTGCTCAAAATTTTAAAGAAAACGGATTAAATTATGC	d__Bacteria	0.842361
AAGTCGCATTTCTCTCGCACCAGGCGGCCCATGCCGCTGCCCTCAGACCCGATGACAATGGCCGCCGGGCCCTTGAGATCAGCCTCATACAGGGAGGTAG	d__Bacteria	0.909555
AAGTGAAACTGCCACACGTACTAGCCTCCAACATGGTACTGCAACAAGACAGCAACGTGAAGCTATGGGGAAAGGCAAAGCCTAACGCTAAACTCTCCAT	d__Bacteria	0.810022
AAGTTGCCGGATGCTTAACTACACCCGGCAATAATTTTTTGCTGATTTTTTTGTTCAGCCTATTGACACTCGTTAGCAGGTTTGCCACCGCTATGAAAGC	d__Bacteria	0.783345
AATACCATCATACTGGTAAAACCGCGTTTTTGCTTGACAGCATGGCGCAGACAGGGTATGATAAAAAGTGTGGAAAACAGAGTGAAAATGCGGCGGAAAA	d__Bacteria	0.753866
AATCAGTGAGGAACTTTGAGAATACGAAGGCAGCTCTGTCGGCATACTTCATTTCGCCGATCTTCTTGATGTCATCAAAAGTAATCTCGGGAATACTTTC	d__Bacteria	0.815975
AATCTGCTCAAATTTATGCGCGCTTCGATAAAAATGATTGGCGTATCCAACCTGCAGAGTTTTATCGCTTCCATGACGCAGAAGTTAACACTTTCGGATA	d__Bacteria	0.790384
AATGAGTCAAAAAGATGAGGAAGTTCATCTTCCTTTAATGTGCAGCCAGTATTTTTTACCGTGATAAGACAGCAGTCCTCCTCCGTAGAAAATGAAATCG	d__Bacteria	0.7772
AATGCAGGTATTCTGTGACCCCACCATAACTGTCTTGAAATACACCAGTCCTTGATATTTTCAAGCCAGTGATAATATGTCTTATCAAAATGCTCAGGAA	d__Bacteria	0.919644
AATGCGCGGAACAGCGCAGGGTCTCTGGTCCGCGAACCGGAAAAACCGTGAAAATCAGCACAGAACTTCCGGCAGACTTCCGCATTTTCCTCCATCAGAG	d__Bacteria	0.857336
AATGCGCGGAACAGCGCGGGGTCTCTGGTCCGTGAACCGGAAAAACCGTGAAAATCAGCACAGAACTTCCGGCAGACTTCCGCATTTTCCTCCATCAGAG	d__Bacteria	0.852306
AATGCGTGGGAGATATGCAGAGAGCTACCAAGCAGTGGAAATCGCAGTGGCAGACTTTGCAACATTTTCCGGTGAAGACAGACAGTAATATTGCGGTGGA	d__Bacteria	0.89146
AATTAACTTTATAACGGCGTAAAGAGTGGTCACATGCTATCCAAGTAGCTAAGATTAAAAAGCAGCTGAGCTGTCATAAGCCCAAGATGCCAATAAGGCC	d__Bacteria	0.871665
AATTAACTTTATAGCGGCGTAAAGAGTGGTCACATGCTATCCAAGTAGCTAAGATTAAAAAGCAGCTGAGCTGTCATAAGCCCAAGATGCCAATAAGGCC	d__Bacteria	0.833615
AATTCAACGGGAAAAACTATCCTTGCGAGGGTTTGTCGGTCGAAATAGCAAACGAAGAAATCGCCGCTTACGAAGGCGGAGAATTAGTGCCGAAAAAGAC	d__Bacteria	0.762454
AATTCAAGATTGTGTGGATAAAATCCGAGTATTCCGTATAAAGCAGAGGAGAGCTTCTTGTCTTTGCTGAAGGAATGCTTCACTCTGTCGATTAGAAACC	d__Bacteria	0.848175
AATTGAGTTTGAGATGAAGTTTATGCCGCTTTTTCCGAAAGAAGGAGAGGACTATGATCCATCGACAGCATCGGGTGGAATTTACAAGAATAATTAATTT	d__Bacteria	0.790921
AATTGCCTGAAGTAAAGCATGCATCAATGGCAAATCCACCATGGACATCTCATCAATAATAATCACATCTGTTTCCAACGGGTTTTCTGCATTTCTTAGG	d__Bacteria	0.823114
ACAAAAGGTGCGAGCGCTATTCGGATTTATTGGGCGTTAAGGGTATGTAGGTGGCCATAAACACTAATTGAAAAAAGCTAGGGAGGATACCTTAGACAAC	d__Bacteria	0.952117
ACAAAATCGCGATTGCTCTCGGTTCCGCAAGCGACGGACTTTTGGGCACGGTAGAGAAAAAGGTTTCGGGCTACAGCGATTATGAGGTGTTCGGCATCTG	d__Bacteria	0.816162
ACAAACGTGAAATGAAATGCGGTTTTTCCCCTACGGGGAAAGAGAGAAATGCGGGATGCTTCTGCCGTTTTCCGATGTGAAAAATCAGAAATTTTTTTGA	d__Bacteria	0.923084
ACAAAGCCACCGGGGAACAGACAGAGAAACAAGCCGCGCCCAAAGCCGACAAAGAGAAAGCGGAACAAACCGACCTAAACAAAGCTGACGAGAAACAAAC	d__Bacteria	0.805976
ACAAATCTGCTCAAATTTATGCGCGCTTCGATAAAAATGATTGGCGTATCCAACCTGCAGAGTTTTATCGCTTCCATGACGCAGAAGTTAACACTTTCGG	d__Bacteria	0.797742
ACAACTCTGAAGGGAACTTCTCTATCTTGTTGTAAGAGAGGCTCACGGTAGAAGCATTGATACCCTTGTAGGTGCCGTTGCTTGTATCTACGCCCGTGAT	d__Bacteria	0.786342
ACAAGTAAGACAAGTGTTATCCATCATTATTAGGTTTAAAGCGTACCCAGACGGCATTTTACACACACAAAGTCAATTTTTTGCTAGAGTTTAATAGGGG	d__Bacteria	0.896374
ACAAGTAAGACAAGTGTTATTCATCATTATTAGGTTTAAGGGGTCACTAGACGGCATTTGTCACCGATGAAAAGGTCAATATTTTGCTAGAGTTTGATAT	d__Bacteria	0.792195
ACAAGTAAGACCAGTGTTATTCATCATTATTAGGTTTAAGGGGTCACTAGACGGCATTTGTAACCGATGAAAAGGTCAATATTTTGCTAGAGTTTGATAT	d__Bacteria	0.813869
ACAAGTAAGACCAGTGTTATTCATCATTATTAGGTTTAAGGGGTCACTAGACGGCATTTGTAACCGATGAAAAGGTTAATATTTTGCTAGAGTTTGATAT	d__Bacteria	0.799693
ACAAGTAAGACGAGTGTTATTCATCATTATTAGGTTTAAAGGGTCACTAGACGGCATTTGTCACCGATGAAAAGGTCAATATTTTGCTAGAGCTTGATAT	d__Bacteria	0.877933
ACAAGTAAGACGAGTGTTATTCATCATTATTAGGTTTAAAGGGTCACTAGACGGCATTTGTCACCGATGAAAAGGTCAATATTTTGCTAGAGTTGGATAT	d__Bacteria	0.881859
ACAAGTAAGACGAGTGTTATTCATCATTATTAGGTTTAAGGGGTCACTAGACGGCATTTGTATCCGATGAAAAGGTTAATACTTTGCTAGAGTTTGATAT	d__Bacteria	0.814082
ACAAGTAAGACGAGTGTTATTCATCATTATTAGGTTTAAGGGGTCACTAGACGGCATTTGTCACCGATGAAAAGGTCAATATTTTGCTAGAGTTTGATAT	d__Bacteria	0.706389
ACACAAAACCGCAGTACGGGTCGGCACAGTAGGCGTCCACCACCGCATCGTCTCTGGTCAGCCAATCGTAGGCGGTTCGGTTTGGCGCGAACTGTTTGTT	d__Bacteria	0.964553
ACACAATAAGCAATCCACCTGGGGAGTACGACCGCAAGGTTGAAACTTAAATAAATTGACGGCCCTGGCTGACTATCTCGTATGCCGTCTTCTGCTTGAA	d__Bacteria	0.725596
ACACAGGTGGGCTTGCGTTTTAAAATATTGAATAGGCATTAAGTGTGATTAGGTTGCCATGATCCTAACGTGCATTAGGTAGGCTTGAGTTCTAAGAGGA	d__Bacteria	0.796184
ACACATCGTATTCGAGAGCGATAAGTCTGTCCTTCGCTCCGAGCATCTTGCCCTCAAGGTCCTTGAGTTCCTGTGTTATAAAGCGCTCGCAGTTTGTAAG	d__Bacteria	0.94004
ACACGGAAGGGGCAAGCGTTACTCATACGTATTGGGCGTAAGGCGTCTGTAGGTGGTTATGATCAATAACTCATTTCTAGATTAGATAAAGATTTTCTTT	d__Bacteria	0.991676
ACAGAAAGGGCAACCCATCGGAGTTATAAATTGGTGTAAAGGGTACGTAGCCGGTGATATTTATCACTAGAGTCTAATGGAAGTACAAACAATACCTAGA	d__Bacteria	0.881935
ACAGAAAGGGCGACCCATTGGAATTATAAATTGGCGTAAAGGATACGTAGCCGGCCGTAAAAATGGCTAGAGTCAAATAGAAGTGATTACAATACCTAGA	d__Bacteria	0.983121
ACAGAAAGGGCGACCCATTGGAATTATAAATTGGTGTAAAGGATACGTAGCCGGCCGTAAAAATGGCTAGAGTCAAATAGAAGTGATTACAATACCTAGA	d__Bacteria	0.958014
ACAGAAAGGGCGACCCATTGGAGTTATGAATCGGTGTAAAGGATACGTAGCCGGCTATAGATATAGCTAGAGTCAAATAGAAGTGAGAACAATACCTAGA	d__Bacteria	0.934644
ACAGAAAGGGCGACCCATTGGAGTTTTAAATTGGCGTAAAGGATACGTAGCCGGCCGTAAAAATGGCTAGAGTCAAATAGAAGTAATTACAATACCTAGA	d__Bacteria	0.927687
ACAGAAAGGGCGACCCATTGGAGTTTTAAATTGGTGTAAAGGATACGTAGCCGGCCATAAAAATGGCTAGAGTCAAATAGAAGTAATTACAATACCTAGA	d__Bacteria	0.848113
ACAGAAAGGGCGACCCATTGGAGTTTTAAATTGGTGTAAAGGATACGTAGCCGGCCGTAAAAATGGCTAGAGTCAAATAGAAGTAATTACAATACCCAGA	d__Bacteria	0.785256
ACAGAAAGGGCGACCCATTGGAGTTTTAAATTGGTGTAAAGGATACGTAGCCGGCCGTAAAAATGGCTAGAGTCAAATAGAAGTAATTACAATACCTAGA	d__Bacteria	0.831715
ACAGAAAGGGCGACCCATTGGAGTTTTAAATTGGTGTAAAGGATACGTAGCCGGCCGTAAAAATGGCTAGAGTCAAATAGAAGTAGTTACAATACCTAGA	d__Bacteria	0.826215
ACAGAAAGGGCGACCCATTGGAGTTTTAAATTGGTGTAAAGGATACGTAGCCGGCCGTAAAAATGGCTAGAGTCAAATAGAGGTAATTACAATACCTAGA	d__Bacteria	0.854415
ACAGAAAGGGCGACCCATTGGAGTTTTAAATTGGTGTAAAGGATACGTAGCCGGCCGTAAAAGTGGCTAGAGTCAAATAGAAGTAATTACAATACCTAGA	d__Bacteria	0.85756
ACAGAAAGGGCGACCCATTGGAGTTTTAAATTGGTGTAAAGGATACGTAGCCGGCCGTAACAATGGCTAGAGTCAAATAGAAGTAATTACAATACCTAGA	d__Bacteria	0.818723
ACAGAAAGGGCGACCCATTGGAGTTTTAAATTGGTGTAAAGGATATGTAGCCGGCCGTAAAAATGGCTAGAGTCAAATAGAAGTAATTACAATACCTAGA	d__Bacteria	0.77697
ACAGAAAGGGCGACCCATTGGAGTTTTAAGTTGGTGTAAAGGATATGTAGCCGGCCGTAAAAATGGCTAGAGTCAAATAGAAGTAATTACAATACCTAGA	d__Bacteria	0.762703
ACAGAAAGGGCGACTCATTGGAGTTTTAAATTGGTGTAAAGGATACGTAGCCGGCCGTAAAAATGGCTAGAGTCAAATAGAAGTAATTACAATACCTAGA	d__Bacteria	0.841178
ACAGAAAGGGCGAGCATTATCCGAATTGATTGGGCGTAAAACGCACGTAGGTGGTCTTAAAGATGCTTGTGCAAAACTGGGTTTTGCACAAGCATCTCTA	d__Bacteria	0.971412
ACAGAAAGGGGGACCCATTGGAGTTTTAAATTGGTGTAAAGGATACGTAGCCGGCCGTAAAAATGGCTAGAGTCAAATAGAAGTAATTACAATACCTAGA	d__Bacteria	0.820719
ACAGACAGTGCAGGCGTTATTCGGATTGACTGGGCGTAAAGGGTACGTAGGTTGTCTAAATAACTATATTCTGAAAAGCTAGAGGATAACTGTAGACAGA	d__Bacteria	0.988175
ACAGACTGAATTTCATCCATAAGGAAGTTCTGAAGGCGGTCTTCGCCAAGAACAGAAAGAACATCGTGCGCGTCTACTGCTCCATCGCAAAGTTTTTCTC	d__Bacteria	0.829854
ACAGAGGATGCTAGCGTTATTCGGAATGAATGGGCGTAAAGAGTCTGTAGGTAGCTTAAAAAGTCTTTTGAGAAATATTTAGGCTTAACCTAAAAGGTTT	d__Bacteria	0.994425
ACAGAGGATGCTAGCGTTATTCGGAATGAATGGGCGTAAGGAGTCTGTAGGTAGCTTAATAAGTCTTTTGAGAAATATTTAGGCTTAACCTAAAAAGTTT	d__Bacteria	0.975764
ACAGAGGATGCTAGCGTTATTCGGAATGAATGGGCGTAAGGAGTCTGTAGGTAGCTTAGAAAGTCTTTTGAGAAATATTTAGGCTTAACCTAAAAAGTTT	d__Bacteria	0.977483
ACAGATGGGATAGCGTTATGAGATAATGAATAGGCATTAAGGATTAGTAAGGTGGTGATAATAAATAACACTAGAGTTATATAAGGAGAAGAGAGGAATA	d__Bacteria	0.815313
ACAGATGGGATAGCGTTATGAGATAATGAATAGGCATTAAGGATTAGTAAGGTGGTGATAATAAATAACACTAGAGTTATATAAGGAGAGGAGAGGAATA	d__Bacteria	0.888044
ACAGATTGAAGTGAAACTCCTTCAGCACAACGATGACTTTAAAGGTGTAGATATCGCTTTCACATCAGCCGGCGCAGGTACCACAAAAGAGTTTTGTGAA	d__Bacteria	0.868954
ACAGCGCTGCGGCGTGGGAATGTGGCGCCATGCTGACCAGAGATACCAGTCAGGAAGTTGCCTGTATACATCTGCAAGCCTGGTTCGGTGGTGTAAACCT	d__Bacteria	0.717069
ACAGGAGACCCAAATTAACCTCCTAACGGTGTAAAGAGTGGTCACATGTTATCCAAGTAGCTAAGATTAAAAAGCAACTGAGCTGTCACAAGGCCAAGAT	d__Bacteria	0.774298
ACAGGAGACCCAAATTAACTTCATAACGGCGTAAAGAGTGGTCACATGCTATCCAAGTAGCTAAGATTAAAAAGCAGCTGAGCTGTCATAAGCCCAAGAT	d__Bacteria	0.918549
ACAGGAGACCCAAATTAACTTTATAACGGCGTAAAGAGAGGTCACATGCTACCCAAGTAGCTAAGATTAAAAAGCAGCTGAGCTGTCATAAGCCCAAGAT	d__Bacteria	0.879355
ACAGGAGACCCAAATTAACTTTATAACGGCGTAAAGAGCAGTCACATGCTATCCAAGTAGCTAAGATTAAAAAGCAGCTGAGCTGTCATAAGCCCAAGAT	d__Bacteria	0.922046
ACAGGAGACCCAAATTAACTTTATAACGGCGTAAAGAGCGGTCACATGCTATCCAAGTAGCTAAGATTAAAAAGCAGCTGAGCTGTCATAAGCCCGAGAT	d__Bacteria	0.935067
ACAGGAGACCCAAATTAACTTTATAACGGCGTAAAGAGTAGTCACATGCTATCCAAGTAGCTAAAATTAAAAAGCAGCTGAGCTGTCATAAGCCCAAGAT	d__Bacteria	0.907927
ACAGGAGACCCAAATTAACTTTATAACGGCGTAAAGAGTAGTCACATGCTATCCAAGTAGCTAAGATTAAAAAGCAGCTGAGCTGTCATAAGCCCAAGAT	d__Bacteria	0.930225
ACAGGAGACCCAAATTAACTTTATAACGGCGTAAAGAGTAGTCACATGCTATCCAAGTAGCTAGGATTAAAAAGCAGCTGAGCTGTCATAAGCCCAAGAT	d__Bacteria	0.928867
ACAGGAGACCCAAATTAACTTTATAACGGCGTAAAGAGTAGTCACATGCTATCCACGTAGCTAAGATTAAAAAGCAGCTGAGCTGTCATAAGCCCAAGAT	d__Bacteria	0.91604
ACAGGAGACCCAAATTAACTTTATAACGGCGTAAAGAGTGGTCACATGCTATCCAAGTAGCTAAGATTAAAAAGCAGCTAAGCTGTCATAAGCCCAAGAT	d__Bacteria	0.900134
ACAGGAGACCCAAATTAACTTTATAACGGCGTAAAGAGTGGTCACATGCTATCCAAGTAGCTAAGATTAAAAAGCAGCTGAACTGTCATAAGCCCAAGAT	d__Bacteria	0.898311
ACAGGAGACCCAAATTAACTTTATAACGGCGTAAAGAGTGGTCACATGCTATCCAAGTAGCTAAGATTAAAAAGCAGCTGAGCTGTCATAAGCCCAAGAT	d__Bacteria	0.914021
ACAGGAGACCCAAATTAACTTTATAACGGCGTAAAGAGTGGTCACATGCTATCCAAGTAGCTAAGATTAAAAAGCAGCTGAGCTGTCATAAGCCCGAGAT	d__Bacteria	0.913846
ACAGGAGACCCAAATTAACTTTATAACGGCGTAAAGAGTGGTCACATGCTATCCAAGTGGCTAAGATTAAAAAGCAGCTGAGCTGTCATAAGCCCAAGAT	d__Bacteria	0.877731
ACAGGAGACCCAAATTAACTTTATAACGGCGTAAAGAGTGGTCACATGCTATCCAGGTAGCTAAGATTAAAAAGCAGCTGAGCTGTCATAAGCCCAAGAT	d__Bacteria	0.885578
ACAGGAGACCCAAATTAACTTTATAACGGCGTAAAGAGTGGTTACATGCTATCCAAGTAGCTAAGATTAAAAAGCAGCTGAGCTGTCATAAGCCCAAGAT	d__Bacteria	0.90307
ACAGGAGACCCAAATTAACTTTATAACGGCGTAAAGGGTGGTCACATGCTATCCAAGTAGCTAAGATTAAAAAGCAGCTGAGCTGTCATAAGCCCAAGAT	d__Bacteria	0.928447
ACAGGAGACCCAAATTAACTTTATAACGGCGTAAAGGGTGGTCGCATGTTATCCAAGTAGCTAAGATTAAAAGGCAACTGAGCCGTCACAAGCCCAAGAT	d__Bacteria	0.937653
ACAGGAGACCCAAATTAACTTTATAACGGCGTAAGGAGTGGTCACATGCTATCCAAGTAGCTAAGATTAAAAAGCAGCTGAGCTGTCATAAGCCCAAGAT	d__Bacteria	0.745163
ACAGGAGACCCAATTTAACTTTATAACGGCGTAAAAAGTGGTCACATGCTATCCAAGTAGCTAAGATTAAAAAGCAGCTGAGCTGTCATAAGCCCAAGAT	d__Bacteria	0.752074
ACAGGAGGCCCAAATTAACTTTATAACGGCGTAAAGAGTGGTCACATGCTATCCAAGTAGCTAAGATTAAAAAGCAGCTGAGCTGTCATAAGCCCAAGAT	d__Bacteria	0.90798
ACAGGGGGGGCAAGCGTTATTCAGAATGACTGGGCGTAAAGGGCATGTAGGTTGTCTATAGTCTATAAGTGGTAAACCTTTTCTGTTTGTGTTTGATGTG	d__Bacteria	0.995542
ACAGGGGGGGCAAGCGTTATTCGGAATGATTTGGCGTAAAGGGCGCGTAGGCGGACAGCTCCTCCTTTAACAGTTAGCAATAAATTCCAAAGCCCAACTT	d__Bacteria	0.999416
ACAGGGGGTGCTAGCGTTGTTCGGAATTACTGGGCGTAAAGGGCGCGTAGGCGGCTTAGCAAGTCAGGTGTGAAATCTCGGGGCTTAACTCCGAAAGTGC	d__Bacteria	0.999999
ACAGGTGGGATTGCGTTTTAAAATATTGAATAGGCATTAAGTGTGATTAGGTTGCCATGATCCTAACGTGCATTAGGTAGGCTTGAGTTCTAAGAGGAGA	d__Bacteria	0.803864
ACAGTCAGATTGCCGTCACTATCAATATATTCAGCCAGTTCCTGTTTCATGTCTTCGATTCTCTGATTTCTGACATCTTCCGGTTCCTGTTTGAATGCCT	d__Bacteria	0.750179
ACAGTTCTTTATCCGTATAATGTTTGGTCAGCTCCTTCGCTGTTAATAAATTCATGTTTGCTCCTTCTATCTTGTTCCATGTATAAAAAGAGCCGCCGCT	d__Bacteria	0.738892
ACATAGGTGGCGAACGTTATCCGGATTTATTGGGCGTAAAGGATGCGTAGATGTTATTATAAGTTATTAGTAGAAAATAGAAGCTCAACTTCTGGCAGCT	d__Bacteria	0.999483
ACATCTTGGCAAAGGCAGAACCATTCTTATTGCCATCGGCAGGATACAAGTGATAACCACACTTGTTGATACGCTCCAAATCAGACTTCATGGTTTCATA	d__Bacteria	0.712588
ACCACCATCTGCTTTTCCTGTGCCATAGTTGCCAAAGGCAGACACATCAATATAGCTAATAATAAGTTTCTCATATAAAAGATAGAAAACATAGGCTAAT	d__Bacteria	0.867518
ACCAGGAATCCTCCGAATATGAGCAATATCCAGGCGAATCGGCTGATGAGGGCAGCACCCGCAAAGATGAAGACGAAGCGAAGCACGATGGCGCCCAGGA	d__Bacteria	0.814375
ACCCAAATTAACTTTATAACGGCGTAAAGAGTGGTCACATGCTATCCAAGTAGCTAAGATTAAAAAGCAGCTGAGCTGTCATAAGCCCAAGATGCCAATA	d__Bacteria	0.912859
ACCCAAATTAACTTTATAACGGCGTAAAGAGTGGTCACATGCTATCCAAGTAGCTAAGATTAGAAAGCAGCTGAGCTGTCATAAGCCCAAGATGCCAATA	d__Bacteria	0.952933
ACCCAAGCGCCTTCAAATTCGCCACGGACATTTGGGCCGCCCCGGCCTTGCCCACCGTCTTGCCGGAAACGCGCGCCTCAATCACGGCCTGAATCCCCGT	d__Bacteria	0.78827
ACCCATTGGAGTTATGAATCGGTGTAAAGGATACGTAGCCGGCTATAGATATAGCTAGAGTCAAATAGAAGTGAGAACAATACCTAGAGAAGTGCTGATA	d__Bacteria	0.94496
ACCGTGTCACGCAGGGTGTAGAGTGTGCCCTGTGAGCAGCATTCAAATACGACCTGATAAAAGAAGCGCAGAACGCCCCGGACTGCCGTGACGACAAGCA	d__Bacteria	0.888944
ACCTCATCAGAGAAGAGGTAGAGATCGTACTTCTTCACCAGGTCGCGAATCTGGTTCATCTCTCTGCGGGTATAGAGATAGCCGGTAGGGTTGTTCGGAT	d__Bacteria	0.727784
ACCTCCTCACCTGGGTCTATGAAGAACTTACCACGATCCTGCAGCTTATCGATGGCGTAAGCATAGGCTGTACCAGTCTCCAAAGCTATCATACTACCAT	d__Bacteria	0.84142
ACCTCGTGGAGGCGTTGACATAGACGGCCGCTGCGTCCACACGGCTCGTAAAGGCCTCGGCAGCCGAGTAATTCTCGGTGACTATCGCCTCGCTGTGACC	d__Bacteria	0.786946
ACCTGGAATCCCTGCATGGTCTTATAGCGATTGAATGTGTCCTTAATGGCGCGTGCCAGAACGTGGTGAATGCCCGGATGACCGTTGGCTGAGGGAGGTC	d__Bacteria	0.854595
ACCTGTGACGACAAATCTGCTCAAATTTATGCGCGCTTCGATAAAAATGATTGGCGTATCCAACCTGCAGAGTTTTATCGCTTCCATGACGCAGAAGTTA	d__Bacteria	0.779757
ACCTTTATGCTTTCTATAACCCCGTCCTCTTCCGCGCGAAGCTCCTTAACCCCGCCCGTCAGCACGTCCTTTTCCTTTTCGGAAAGGGCGGAATCTATCA	d__Bacteria	0.7329
ACGAAAGGATCAAGTGTTATCCATAATGATTGGGCGTAAAGGGTAATTAGACGGCCATTGTTATTTTATTGTGAAAGATTAATTTAATTTTTAAAAACAC	d__Bacteria	0.903078
ACGAAAGGGGCTTGTGTTATTCGGTCAAATTGGGCGTAAAGGATTCTAATGCTGTTTTTTGAACGTTAAAGATTAAATGTCAAAGTTAACCTTTGGAATA	d__Bacteria	0.928879
ACGAAGGGCGCGGGTGTTATTCGTTTTGATTGGGTGTAAAGGGTAGGTAGGCGGTTTCTTGCTTTCTTTGGACAAAATCGCGGAGTATTCCTACGCGAAG	d__Bacteria	0.942221
ACGAAGGGGATAAGCGTTACTCAGCATTATTGGGCGTAAAGGGTGCGTAGGTGGTTTAATAAGTTAATACGAAAATCCAAGACATTTAATTTTTGTAAAG	d__Bacteria	0.998948
ACGAAGGGTGCAAACGTTGCTCGGAATTATTGGGCGTAAAGCGCACGTAGGCGGCTTTGCAAGTCCGATGTGAAATCCCTCGGCTTAACCAAGGAAGTGC	d__Bacteria	1
ACGAAGGGTGCAAACGTTGCTCGGAATTATTGGGCGTAAAGCGCACGTAGGCGGCTTTGCAGGTCCGATGTGAAATCCCTCGGCTTAACCAAGGAAGTGC	d__Bacteria	1
ACGACAAATCTGCTCAAATTTATGCGCGCTTCGATAAAAATGATTGGCGTATCCAACCTGCAGAGTTTTATCGCTTCCATGACGCAGAAGTTAACACTTT	d__Bacteria	0.804192
ACGAGAGGGGTAAGCATTATTCATCATTAATGGGTCTAAAGGGTACGTAGGCTGTATCATAAGACTGGAAGGTATCGAACTAAATGAATAAGAGCTTTTC	d__Bacteria	0.745043
ACGAGCTAAGCAGCATAACCGCCGTCGCGTTGCTCGGTCCGAATGTTATGTAGACCGAACGGCAGAAAAGAAGCCCTATTATCGAGGCGATTATCCCGCT	d__Bacteria	0.778002
ACGAGGGGGGCAAGCGTTATTCAAAATGACTGGGCGTAAAGGGCATCTAGGCGGTTTACTATGTTTTTTATAAAAAATACCAGAGCTTAACTGTGGTAAT	d__Bacteria	0.997586
ACGAGGGGGGCAAGCGTTATTCAATTTAACTGGGCGTAAAGCGTCTGTAGGCGGCAAGTTTCGTTATTCGGTAAACATTAAAGTTGGACTTTAAAAGACG	d__Bacteria	0.994294
ACGAGGGGGGCAAGCGTTCTTCGGAATGATTGGGCGTAAAGGGTACGTAGGCGGTAAAACATTATGAATCGAAAAATACCACAGAAGAACTGTGGAAACC	d__Bacteria	0.998546
ACGAGTAAGTCTAGCGTTATTCATCTTTATTAGGTTTAAAGCGTACCTAGATAGTATATAAGATTTGAAAAAATGCTAATATACTTGAGTTTTATATGGG	d__Bacteria	0.931032
ACGATACATTTGTAAATTGCAAAGTCTTAGCCTCAGCAGTTTCTGGTGCCTGCTTCAAGCGGATGAGGCAAGGGGTAAGTGCTGGTATGGTGATGCTATT	d__Bacteria	0.83923
ACGATATTATTGACGACCTTATATGGCGAATCGAGTTCGTCGTATGGACAGATGATCTCTGCCAGTGTGTCAACCGAGAAATTCTTTTTGTGGTTCAGAA	d__Bacteria	0.782646
ACGATATTCATCTTTCTGCCCTCACGTCTGAAAGCTTCTACTGCACGTCTGTTGATACCTGCGTGGATAGTCATAAAGTCAACGCCCTCTTCTGCGTGGG	d__Bacteria	0.852894
ACGATCATGTTTACGTCTTCCAGTGTTTCGCGTCCGCTGATGAGGTCGGTCATCGTAACGTCTTTTACGTCGAAACCTGCCAGATAGAGTGAGTAAGCCA	d__Bacteria	0.80646
ACGATGAATACTAGGTGTCGGGGGACAAAGTCCTTCGGTGCCGCCGCAAACGCAATAAGTATTCCACCTGGGGAGTACGTTCGCAAGAATGAAACTCAAA	d__Bacteria	0.870319
ACGATGAATACTAGGTGTCGGGGGTTTATAAACCTTCGGTGCCGCAGCAAACGCAATAAGTATTCCACCTGGGGAGTACGTTCGCAAGAATGAAACTCAA	d__Bacteria	0.922306
ACGATGAATACTAGGTGTCGGGGGTTTATAAACCTTCGGTGCCGCAGCAAACGCAATAAGTATTCCACCTGGGGAGTACGTTCGCAAGAATGAAACTTAA	d__Bacteria	0.851324
ACGATGATCACTAGGAGTTTGCGGTACACAGTAAGCTCTGCAGCGAAAGCGTTAAGTAATCCACCTGGGGAGTACGCCGGCAAGGTTGAAACTCAAATAA	d__Bacteria	0.948691
ACGATGGATGCCCGCTGTTGGTCTGAATAGGTCAGTGGCCAAGCGAAAGCATTAAGCATCCCACCTGGGGAGTACGCCGGCAACGGTGAAACTCAAAGGA	d__Bacteria	0.742629
ACGATGGATGCCCGCTGTTTGCCACTTTGGTAAGCGGCCAAGCGAAAGCGTTAAGCATCCCACCTGGGGAGTACGCCGGCAACGGTGAAACTCAAAGGAA	d__Bacteria	0.937221
ACGATGGATGCTCGCTGTTTGCGTCTGACGTAAGCGGCCAAGCGAAAGCGTTAAGCATCCCACCTGGGGAGTACGCCGGCAACGGTGAAACTCAAAGGAA	d__Bacteria	0.950555
ACGCCATAAACGATGAGGACTAGACGTTGGGAGGGTTAGCCTCTCAGTGTCGCAGCTAACGCGATAAGTCCTCCGCCTGGGGAGTACGGCCGCAAGGTTG	d__Bacteria	0.822957
ACGCCATAGCAGTAGGAGAGGGTTTTATATGTCTCGCTGACAGAGGAGGTGACGAACTCGTCTCCTGACTTGTTAGGAGAACTTACGCTCAGGAAGTTGT	d__Bacteria	0.846026
ACGCCCTAAACGATGCATACTTGGTGTGAGCCGTTCATTCGGTTCGTGCCGGAGTTAACGCGTTAAGTATGCCGCCTGGGGAGTACGGTCGCAAGGCTGA	d__Bacteria	0.760181
ACGCCCTAAACGATGGATACTCGATGTCGGGCCGCAAGGCTCGGTGTCTAAGCTAACGCATTAAGTATCCCACCTGGGGAGTACGATCGCAAGGTTGAAA	d__Bacteria	0.865943
ACGCCCTAAACGATGTCGACTGGTTGTTGGGGGTTTGACACTCTCAGTAACGAAGCTAACGCGTGAAGTCGACCGCCTGGGGAGTACGGCCGCAAGGTTA	d__Bacteria	0.760667
ACGCCCTAAACGGTGGGCACTAGGTGTGGGATTCGTAAGGGTTCCGTGCCGAAGGGAAACCATTAAGTGCCCCGCCTGGGGAGTACGGCCGCAAGGTTGA	d__Bacteria	0.750958
ACGCCGCAAACGTTATCCCGAAAACGAGCTTTTTATCGGTTTTTATAAACGCGTAAATCATAAATCCGACAAAAAGAATTCCGCCGAAAAACACCGCGTT	d__Bacteria	0.861882
ACGCCGTAAACGATGAGAACTAGACGCTGGGTAGGTCACTGCTCGGTGTCGGAGCTAACGCGTGAAGTTCTCCGCCTGGGGAGTACGGCCGCAAGGTTGA	d__Bacteria	0.965037
ACGCCGTAAACGATGAGTACTAGGTGTTGCGGGTATTGACCCCTGCAGTGCCGCAGCTAACGCATTAAGTACTCCGCCTGGGAAGTACGGTCGCAAGACT	d__Bacteria	0.841098
ACGCCGTAAACGATGGATACTAGCTGTGGGGGGTATCGACCCCTTCCGTAGCGAAGCTAACGCGTTAAGTATCCCGCCTGTGGAGTACGGCCGCAAGGCT	d__Bacteria	0.84324
ACGCCGTAAACGATGGGCACTAGGTGTAGGAGGTTTTTAACCCTCCTGTGCCGTAGCTAACGCATTAAGTGCCCCGCCTGGGGAGTACGGTCGCAAGATT	d__Bacteria	0.900618
ACGCGGTAGACGATGGGCACTAGGTGTAGGAGGTATTGACCCCTTCTGTGCCGAAGCTAACGCATTAAGTGCCCCGCCTGGGGAGTACGGCCGCAAGGCT	d__Bacteria	0.932147
ACGCTATGGACGGCGGAACGATGTACATAACCGCAACGGCGGCGGACGGGCAGACGTGCGATATTCCTATATATGTATACAGCGTTTCCGGCGGACACGA	d__Bacteria	0.784776
ACGCTCCCTCTTCGTCGTGCGCGTAGCGGTAGCCCTTGTGATACCCCAATTCCTTCATAAGTTTTGTGGGAGCGTTTCTTAAGTGCATCGGCACGGGGCG	d__Bacteria	0.915958
ACGCTGTAAACGATGAGCACTAGGTGTAGCGGGTACTCATTCCTGCTGTGCCGCAGCTAACGCGATAAGTGCTCCGCCTGGGGATTACGGTCGCAAGACT	d__Bacteria	0.861381
ACGCTGTAAACGATGATTGCTAGTTGTCAGCCGGCATGCCGGTTGGTGACGCAGCTAACGCATTAAGCAATCCGCCTGGGGAGTACGGTCGCAAGATTAA	d__Bacteria	0.707415
ACGCTGTAAACGATGGGAGCTAGGTGTGGGAGGTATTGACCCTTCCGTGCCGCCGCTAACGCATTAAGCTCCCCGCCTGGGGATTACGGCCGCAAGGTTA	d__Bacteria	0.913509
ACGCTGTAAACGGTGTGCACTAGGCGTGGGGCCCGTACGGGTTCTGTGCCGTAGTTAACGTGTTAAGTGCACCGCCTGGGGAGTATGCCCGCAAGGGTGA	d__Bacteria	0.830291
ACGCTGTAAACTATGGATGCTAGCCGTTGGGGAGCTTGCTCTTCAGTGGCGCAGCTAACGTCTTAAGCATCCCGCCTGGGGAGTACGGTCGCAAGATTAA	d__Bacteria	0.832249
ACGGAAGGGGCAAGCGTTACTCGTACGGACTGGGTGTAAAGCGTTTGTAGGTGAAACCCCGACGGGGGGGTACCGGGTGAGAACCCCGCCGTGCCCCCCG	d__Bacteria	0.968006
ACGGAAGGGGCAAGCGTTACTCGTACGGACTGGGTGTAAAGCGTTTGTAGGTGAAACCCCGACGGGGGGGTGCCGGGTGAGAACCCCGCCGTGCCCCCCG	d__Bacteria	0.96682
ACGGAAGGGGCAAGCGTTACTCGTACGTATTGGGCGTAAGGCGTCTGTAGGTGGTTATGATCAATAACTCATTTCTAGATTAGATAAAGATTTTCTTTGA	d__Bacteria	0.990896
ACGGAAGGGGCGAGCGTTACTCGTACGTATTGGGCGTAAGGCGTCTGTAGGTTGTTATTTTTAATAACTAGTCCTGGTTTAGCAAAGTTACTTTTTTGAG	d__Bacteria	0.970756
ACGGAGAGGGCAAGTGTTATTCGCATTGACTGGGTGTAAAGGGTGCGTAGGTGGCTTGTTAAGTTTCAAAGTAAAGGTTAAACTCAAAGTTTAAAGGCTT	d__Bacteria	0.992702
ACGGAGGGAGCTAGTGTTATTATGTTGACTGGGCGTAGGGTACGTAGGTGGTGAAATGAAAAAAAAATGAAATACTAGGTCATCATCTTTTCTGTTTTTT	d__Bacteria	0.944416
ACGGAGGGGACAAGCGTTATTCATCCTTATTGGGCGTAAAGGGTATGTAGGTTATGAAAGAGATTTTTTCTGAAATTTCAAATTTGCGTTTCGAAAGTGG	d__Bacteria	0.978162
ACGGAGGGGGCTAGTGTTATTCGTGTTGACTGGGCGTAAAGGGTACGTAGGTGGCGAAGTGAGCTTTAAGTCAAAAACTGGCGTTGCGTCTTTTCGGCTT	d__Bacteria	0.997126
ACGGAGGGTGCGAGCGTTAATCGGAATTATTGGGCGTAAGGCGAGCGCAGGCGGTCTTTTAAGTCTGATGTGAAAGCCTCCGGCTTAACCGGAGAGGGTC	d__Bacteria	0.999998
ACGGAGGGTGCGCGCGTTAATCGGAATGACTGGGCGTAAAGGGCGCGCAGGCGGGACAATAAGTCAGTTGTGAAATTTCCGGGCTCAACCTGGGGAGGTC	d__Bacteria	0.999987
ACGGCGGCCGTAACTATAACGGTCCTAAGGTAGCGAAATTCCTTGTCGGGTAAGTTCCGACCTGCACGAATGGTGTAATGATCCGGACGCTGTCTCAACC	d__Bacteria	0.841471
ACGGGAGGAACTAGTGTTACTCGTCTTGATTGGGCGTAAAGGGTGTGTAGGTGGTATTTAGTTCTGTATTAACAAAAAACACATTAGTAATGTCGCTTAT	d__Bacteria	0.972764
ACGGGAGGGGCAAGCGTTATCCACCATAACTGGGCGTAAAGAGTCTGTAGACTGTGAATTAAGTTGCTTGTTAAATTTTAAAATTGAGATTAAGAAAACT	d__Bacteria	0.995958
ACGGGGGAGACTAGTGTTATTCGTGATGACTGGGCGTAAAGGGTATGTGGTGGTAAATTAAAAATAGATGCAAAAACTGAAGATAAACTTCTTTAAAGTC	d__Bacteria	0.888577
ACGGGGGATACAAGCGTTATCCGGAATTACTGGGCGTAAAGCGTATGTAGGTGGTTTTAATATATTTTTAAATAAATAAAACTATATATGTTTTAAATAA	d__Bacteria	0.999317
ACGGGGGATACAAGCGTTATCCGGAATTACTGGGCGTAAAGCGTATGTAGGTGGTTTTAATATATTTTTAAATAAATAAAACTATATGTGTTTTAAATAA	d__Bacteria	0.999434
ACGGGGGATACAAGCGTTATCCGGAATTACTGGGCGTAAGGCGTATGTAGGTGGTTTTAATATATTTCTAAATAAATAAAACTATATATGTTTTAAATAA	d__Bacteria	0.99786
ACGGGGGATATAAGCGTTATCCGGAATAACTGGGCGTAAAGAGTATGTAGATGGTTTAATATATTTTTAAATAAATAAAACTATATTTCTGTTTTTTTTA	d__Bacteria	0.993639
ACGGGGGATATAAGCGTTATCCGGAGTAACTGGGCGTAAAGAGTATGTAGATGGTTTAATATATTTTTAAATAAATAAAACTATATTTCTGTTTTTTTTA	d__Bacteria	0.991319
ACGGGGGGAACAAGCATTATTCATCTTAATTGGGCGTAAAGAGTTTGTAGGTTGTTTTTGAAGTTGAAAAAAAAATTCAAGAAATAATTTTTGTGCTTTT	d__Bacteria	0.900548
ACGGGGGGAATAAGCATTATTCATCTTAATTGGGCGTAAAGAGTTTGTAGGTTGTTTTTGAAGTTGAAAAAAAAATTCAAGAAATAATTTTTGTGCTTTT	d__Bacteria	0.857356
ACGGGGGGGGCAAGCGTTACCCGAAATTACTGGGCGTAAAGGGCATGTAGGCGGTCCATCACCAACCTCACTCCCCTAAGGGAGTAACTCTTTTCTTCAC	d__Bacteria	0.997111
ACGGGGGGGGCAAGCGTTATTCGAAATGATTGGGCGTAAAGAGCACGTAGACAGTTTTTTAAGACGACAGACATAGTTATCAGTTTACTGATTCTATTCT	d__Bacteria	0.984722
ACGGGGGGGGCAAGCGTTATTCGTCGTGACTGGGCGTAAAGGGTTCGTAGACGGTTTGCAACTATTTTCGGCGACATTTCGTAAATTATTACATTTTGCC	d__Bacteria	0.989438
ACGGGGGGGGCAGGTGTTACTCATCTTTACTGGGCGTAAAGGGTGTGTAGGTGGTTTTATGCTGTTTTTAACAAAATCTTATGGTAAGCTAAAATTCGTT	d__Bacteria	0.946654
ACGGGGGGGGCGAGCGTTATCCATCATTACTGGGCGTTAAGAGTCCGTAGACGGTGTTGTAAGTTTTTTGTGAAATTTTAAGTGATAATCTTAACAAAGT	d__Bacteria	0.981923
ACGGGGGGGGCGAGCGTTATTCGAAATGATTGGGCGTAAAGGGCACGTAGACGGTTTTTTGAGCTGACATGCTTGAGGTCGTACAAAGAATACAAAATAA	d__Bacteria	0.993134
ACGGGGGGGGCGAGCGTTATTCGAAATGATTGGGCGTAAAGGGCACGTAGACGGTTTTTTGAGTACACATCTTTTTATTCGTACAAAGAATACAAAATAA	d__Bacteria	0.988725
ACGGGGGGGGCGAGCGTTATTCGAAATGATTGGGCGTAAAGGGCACGTAGACGGTTTTTTGAGTTGACATGCTTGAGGTCGTACAAAGAATACAAAATAA	d__Bacteria	0.991163
ACGGGGGGGGCGAGCGTTATTCGAAATGATTGGGCGTAAAGGGCACGTAGACGGTTTTTTGAGTTGACATGCTTTAAAGCGTAGAAAGAATACAAATAAA	d__Bacteria	0.99198
ACGGGGGGGGCTAGTGTTACTCATCATTACTGGGTGTAAAGCGTATGTAGGCGGTTTATTAAGTTTAAATTATGACAATCCAAGCATAACTTGGAAAATT	d__Bacteria	0.973345
ACGGGGGGGGGTAGTGTTATTCGTGATGACTGGGCGTAGGGTACGTAGGTGGATAATTAAAAATACAGTAAAAAACTGAGGTTAACCCTCTTTAATCTGC	d__Bacteria	0.965741
ACGGGGGGGGTAGTGTTATTCGTGATGACTGGGCGTAGGGTACGTAGGTGGATAATTAAAAATACAGTAAAAAACTGAGGTTAACCCTCTTTAATCTGCA	d__Bacteria	0.970113
ACGGGGGGGGTTAGTGTTATTCATCGTTACTGGGTGTAAAGCGCGCGTGGACTGTTTAAAAAGTTTTAATTAAAACAATCTAAGCATAACTTAGAAATTA	d__Bacteria	0.863185
ACGGTGGGAGCTAGTGTTATTGTGATGACTGGGCGTAGGATATGTAGGCGGTGAAAGTCGGTGTAAATTAAATCCTGGGTAGCAACCCTTGTCTGTTTAC	d__Bacteria	0.976307
ACGGTGGGAGCTAGTGTTATTGTGATGACTGGGCGTAGGGTATGTAGGCGGTGAAAGTCGGTGTAAATTAAATCCTGGGTAGCAACCCTTGTCTGTTTAC	d__Bacteria	0.976101
ACGTAGGGAGCAAGCGTTGTCCGGAATCATTGGGCGTAAAGCGCGCGTAGGCGGCCCTGTAAGTCCGTTGTGAAAGTCAAAGGCTCAACCTTTGAAAGCC	d__Bacteria	1
ACGTAGGGAGCAAGCGTTGTCCGGAATCATTGGGCGTAAAGCGCGCGTAGGTGGCTCTGTAAGTCCGTTGTGAAAGTCAAAGGCCCAACCTTTGAAAGCC	d__Bacteria	1
ACGTAGGTATGTCGCAGGACTTTATATTCGGAACTCAAAGACGTGATGAAAAACAGGAAATTGCGGACTACCACAGTGAGCTTTATGAAGCACTCGCCGG	d__Bacteria	0.75451
ACGTGACCACAAGCATCATTCCCATGGGGAAATACAGCATCCAGCCCGTTCTGCCGGTAGTTTTCAGGAATACCGCAAGCGCAATCAGCACAAGCGCTGC	d__Bacteria	0.769277
ACGTGAGGGGCAAGCGTTAGACGTCTCAACTGAGCGTAAAGGATTCGTAGGTGGCTTAAAGCTTGTTTTTTATGAAAGCCCAGAATTCGCTTCTGGAAGG	d__Bacteria	0.991217
ACGTGAGGGGCAAGCGTTAGACGTCTCAACTGAGCGTAAAGGATTCGTAGGTGGCTTAAAGCTTGTTTTTTATGAAAGCCCAGAGTTCGCTTCTGGAAGG	d__Bacteria	0.987406
ACGTGGGAGGCAAGCGTTATTGATCTTAAATAGGTCTAAAGGGTCCGTAAAACGGTAGATTAAGCGTAATATTTAAAAATAAAGATCGAACTAATCTACT	d__Bacteria	0.881506
ACGTGGGAGGCAAGCGTTATTGATCTTAAATGGGTCTAAAGGGTCCGTAAAACGGTAAATTAAGCGAAGATTTTAAGATACTATCGAACTAATTTACTAG	d__Bacteria	0.916383
ACGTGGGAGGCAAGCGTTATTGATCTTAAATGGGTCTAAAGGGTCCGTAAAACGGTAGATTAAGCGTAATATTTAAAAATAAAAATCGAACTAATCTACT	d__Bacteria	0.849976
ACTATCTCACCCTCAGTGTCATGCCGGCCTTGATTGTGTCAGGCGCCAGATCCATGACAGCCCTCTCCTCGCCGGCCATCTCGATGAAACTGTGGGTAAA	d__Bacteria	0.791197
ACTATTACCAGATGTGAAGCTTTTAAGTCAAGGAGAAGTCTCTTTAACATCCGTGGCTCTTTCATTTGCATTGGTAAGTCAATCCTTAAATGGATACAAT	d__Bacteria	0.91271
ACTGATCACCGCCACAGCCGTCGACTCCGATACGGAGAACAAGATGCGCAAGATGGTGGAGCAGAGAACGCAAGGTACTGTGGAGTTCAAGACTGAGGTG	d__Bacteria	0.870521
ACTGCAACACGAATCCGAACACCAGAATCGAAAGGAGCCCTACGACGCCGTAAACGATTTTCGGAATGAACGTTTTGGGGTTTTTCTTTGCAAGGTTCCA	d__Bacteria	0.867444
ACTGCAACACGAATCCGAACACCAGAATCGAAAGGAGCCCTACGACGCCGTAAACGATTTTCGGAATGAATGTTTTGGGGTTTTTCTTTGCAAGGTTCCA	d__Bacteria	0.790608
ACTGTCCATACCTGATTGGTAGTGAATTTGAAGTCGTCTTCACCAAACGGTTTTTCGGTCAATTCTTTGATACTGTTTTTGCCGCTTGAAGTTCCGCCAA	d__Bacteria	0.860156
ACTGTTGAACGAAAGCGATATTATCCGTCAGGCAACCGAAGAAGCGGCAAAAATCAAACAGGAAGCCATGGATATGCGCGTCCACGTCGAGTACGACCTG	d__Bacteria	0.716147
ACTTTTGAACGAAAGCGATATTATCCGTCAGGCAACCGAAGAAGCGGCAAAAATCAAACAGGAAGCCATGGATATGCGCGTCCACGTCGAGTACGACCTG	d__Bacteria	0.730047
AGAAACCCTAGTAGTCCATGACGAGATCGGAAGAGCACACGTCTGAATCCAGTCACCGAGAGTTATCTCGTATGCCGTCTTCTGCTTGAAAAAAAAAAAA	d__Bacteria	0.70478
AGAAGAGTGATTAGATACCCTGGTATTAGAAACCCCGGTAGTCCATGACGAGATCGGAAGAGACACGTCTGAACTCCAGTCACGTCTATGAATCTCGTAT	d__Bacteria	0.791594
AGAAGGAGGAACAGAACAATGGCTAACAGAACATTCTCAATCGGAGGAGTGCATCCGAACGATGCCAAGATCTCGCGCGATTGCGCCATCGAGGCTCTTC	d__Bacteria	0.825059
AGAAGTATTCAAATCGCTTGCGGTCGTTGGGTGAAAGCGAATCCACCCAAACAGTCTGCTGCTTCGCTGGCTGCACCTTTTTCTTACGGGCCAACGAAGG	d__Bacteria	0.86393
AGACAGAAAGGGCGACCCATCGGAGTTTTAAATCGGTGTAAAGGATACGTAGCCGGCTATAATATTTTTATAGCTAGAGTCAAATAGAAGAATTAACAAT	d__Bacteria	0.89308
AGACAGATAGTAATTGGGAGGCAGAGACTAAGGTGTCAGATAAATATAAAAAGGTATCTCCTGAGGATGTCCTCAGTAAAATCATGAATATGTAATGAGA	d__Bacteria	0.73612
AGACCCAAACTAACTTTATAACGGCGTAAAGAGTGGTCACATGCTATCCAAGTAGCTAAGATTAAAAAGCAGCTGAGCTGTCATAAGCCCAAGATGCCAA	d__Bacteria	0.920423
AGACCCAAATTAACTTTATAACGGCGTAAAGAGCGGTCACATGCTATCCAAGTAGCTAAGATTAAAAAGCAGCTGAGCTGTCATAAGCCCAAGATGCCAA	d__Bacteria	0.952748
AGACCCAAATTAACTTTATAACGGCGTAAAGAGTGATCACATGCTATCCAAGTAGCTAAGATTAAAAAGCAGCTGAGCTGTCATAAGCCCAAGATGCCAA	d__Bacteria	0.907939
AGACCCAAATTAACTTTATAACGGCGTAAAGAGTGGTCACATGCTATCCAAGTAGCTAAGATTAAAAAGCAGCCGAGCTGTCATAAGCCCAAGATGCCAA	d__Bacteria	0.920849
AGACCCAAATTAACTTTATAACGGCGTAAAGAGTGGTCACATGCTATCCAAGTAGCTAAGATTAAAAAGCAGCTGAGCTGTCATAAGCCCAAGATGCCAA	d__Bacteria	0.933071
AGACCCAAATTAACTTTATAACGGCGTAAAGAGTGGTCACATGCTATCCAAGTAGTTAAGATTAAAAAGCAGCTGAGCTGTCATAAGCCCAAGATGCCAA	d__Bacteria	0.913125
AGACCCAAATTAACTTTATAACGGCGTAAAGAGTGGTCACATGCTATCCAGGTAGCTAAGATTAAAAAGCAGCTGAGCTGTCATAAGCCCAAGATGCCAA	d__Bacteria	0.907133
AGACCCAAATTAACTTTATAACGGCGTAAAGAGTGGTTACATGCTATCCAAGTAGCTAAGATTAAAAAGCAGCTGAGCTGTCATAAGCCCAAGATGCCAA	d__Bacteria	0.924011
AGACGAAGGGCGCGGGTGTTATTCGTTTTGATTGGGTGTAAAGGGTAGGTAGGCGGTTTCTTGCTTTCTTTGGACAAAATCGCGGAGTATTCCTACGCGA	d__Bacteria	0.92353
AGACGGATGAGGAAAAGCACTTGACCTGACGCTTTCCTTCGCTGCTTACAAATCTTGCGCTATATAATCCGTCCTTTCTCTGGCAGATACCCTTGCCGCA	d__Bacteria	0.849717
AGAGCACATTAGAAACCCGGGTAGTCCATGACGAGATCATCGGAAGAGCACACGTCTGAACTCCAGTCACCGAGAGTTATCTCGTATGCCGTCTTCTGCT	d__Bacteria	0.79409
AGAGCAGGAACATGAACCGGCAGTTCGTTTTACCTCTGTAAAAGAGAATAAAACATCTGCAAAATCTAATTCCAAAGTGACACCGATGCGTACGGTGAAA	d__Bacteria	0.874901
AGAGGATGCTAGCGTTATTCGGAATGAATGGGCGTAAAGGGTCTGTAGGTAGCTTAAAAAGTCTTTTGAGAAATATTTAGGCTTAACCTAAAAAGTTTAA	d__Bacteria	0.987834
AGAGTGATTAGAAACCCGAGTAGTCCATGACGAGATCGGAAGAGCACACGTCTGAACCCAGTCACCGAGAGTTATCTCGTATGCCGTCTTCTGCTTGAAA	d__Bacteria	0.746306
AGAGTGATTAGAAACCCGGGTAGTCCATGACGAGATCGGAAGAGCACACGTCTGACTCCAGTCACCGAGAGTTATCTCGTATGCCGTCTTCTGCTTGAAA	d__Bacteria	0.705318
AGAGTGATTAGAAACCCGTGTAGTCCATGACGAGATCGGAAGAGCCACACGTCTGAACTCCAGTCACCGAGAGTTATCTCGTATGCCGTCTTCTGCTTGA	d__Bacteria	0.708304
AGAGTGATTAGATACCCGAGTAGTCCATGACGAGATCGGAAGAGCACACGTCTGAACTCAGTCACCGAGAGTTATCTCGTATGCCGTCTTCTGCTTGAAA	d__Bacteria	0.712893
AGAGTGCATTAGATACCCTTGTAGTCCATGACGAGTCGGAAGAGCACACGTCTGAACTCCAGTCACCGAGAGTTATCTCGTATGCCGTCTTCTGCTTGAA	d__Bacteria	0.792576
AGATAATCGAGCCTTTCGATGACGAAACTTGCCTGAACTGCGGGGATTCTTGCCTTAACCTTTTCTACGATTTCTTCCGGTGAAAGCCCCTTGTCCGCAA	d__Bacteria	0.905207
AGATACAGAACGTACCACCAACCTCGGTCGTGGTGGTAGTGACTATACTGCAGCTATCATTGCAGCAGCTTTGAATGCGGAAGTACTTGAGATTTGGACA	d__Bacteria	0.724102
AGATATTAGAAACCCGAGTAGTCCATGACGAGATCGGAAAGCACACGTCTGAACTCCAGTCACCGAGAGTTATCTCGTATGCCGTCTTCTGCTTGAAAAA	d__Bacteria	0.737765
AGATATTAGAAACCCTTGTAGTCCATGACGAGATCGGAAGACACACGTCTGAACTCCAGTCACCGAGAGTTATCTCGTATGCCGTCTTCTGCTTGAAAAA	d__Bacteria	0.769375
AGATATTAGAAACCCTTGTAGTCCATGACGAGATCGGAGAGCACACGTCTGAACTCCAGTCACCGAGAGTTATCTCGTATGCCGTCTTCTGCTTGAAAAA	d__Bacteria	0.756702
AGATATTAGATACCCGAGTAGTCCATGACGAGATCGGAAGGAGCACACGTCTGAACTCCAGTCACCGAGAGTTATCTCGTATGCCGTCTTCTGCTTGAAA	d__Bacteria	0.805719
AGATATTAGATACCCTAGTAGTCCATGACGAAATCGGAAGAGCACACGTCTGACTCCAGTCACCGAGAGTTATCTCGTATGCCGTCTTCTGCTTGAAAAA	d__Bacteria	0.817114
AGATATTAGATACCCTAGTAGTCCATGACGAGACGGAAGAGCACACGTCTGAACTCCAGTCACCGAGAGTTATCTCGTATGCCGTCTTCTGCTTGAAAAA	d__Bacteria	0.727112
AGATCAGCAGTGGCGTTATGTCGAATTGGTGCACTGAGGCTCCCACGTTCTGGAATGATTTGCGTCGTGGCGTAATCGTTGAGGCGCGTGTCATTTCAGC	d__Bacteria	0.832129
AGATCCTGGTGCTATTGGAAAACGTGGTGTAAGAGAGAAGAATGTAACTTTAGCTATTTCAAAAGCACTTTATAGATACATCAACTCTAATAAACAATTT	d__Bacteria	0.731888
AGATTCCAGTCTGCCGGCGGAATCCCCATGTATTCCTTGGCAAAGGCAATATCCTGTGCGCTTGCCTCGCCAGACCATCCGACCGTTGTGTTGTTATCAT	d__Bacteria	0.795232
AGCAAAAGAACTGGTACCACTTGAGGAGTACGAAAATACCATGAAGGATATCTTCACTACCTCTGTCAATCGCTCTACTATTGACGAAAGTCCAATGGCT	d__Bacteria	0.845937
AGCAAAGGGAAATCGAGCGTACCGTTGCCATAGCGGGCGCGCACGACGCGCCGGTCGTTGAGGCCGCGCTTAGGGCCGAGCAGCAGGATATTGCAATTCC	d__Bacteria	0.832834
AGCAAGTGAGAGTCGATACGCTGCAACTCGTCCATGATGGTACGGATGTAGCGGATGCGGTCTGAGAGTTCAATACCCATCGCCTCTTCGATAACGCCTA	d__Bacteria	0.786808
AGCACCTTTATTATTTCAACGGTCTGCTTTTCCGAAACCGACATCTGATAAATTTTCTTTTTCGGGTCAATTTCAAACCCGTATTTCTCCGAAATTTCGG	d__Bacteria	0.791885
AGCATATCCCTGGTGTCCTTGTAATAAACATCGGCGAGGAAATCTATCCTGTTCTTGAACAGGCTGACATCCAGCCCGAGGTCATACTGGTAGGTGGTCT	d__Bacteria	0.773391
AGCCAGAGAGGAAGTAGTACTGAGTCTGTTCTGGGTTAAGAATAGATACTGGTGGGAGAACACCGAAAGCGTCAGCAGAAAGGAAGATTACCTTCTTTGC	d__Bacteria	0.84154
AGCCCTAAACGATGCTCATTAGATGTGGGAGGTATCGACCCCTTCCGCGTCGCAGCTAACGCATTAAATGAGCCGCCTGGGGAGTACGGCCGCAAGGTTG	d__Bacteria	0.849923
AGCCGAAACAGCGTTTTCGTCACACACCACAGGAAAAACAGCGCCACAATCGCACCGCAGTACAGGAACACAAACATGTACGTGTTGTCAATCAGCCCGT	d__Bacteria	0.771502
AGCCGCGGTAATACAGGAGACCCAAATTAACTTTATAACGGCGTAAAGAGTGGTCACATGCTATCCAAGTAGCTAAGATTAAAAAGCAGCTGAGCTGTCA	d__Bacteria	0.911966
AGCCGTACCACATCACCGCCGCCGTTACCGATACCAGTACGCCGCAGCAGGCCATGAAGAAGGTGCTGGCGGATATGGAAAAGCACAAGAATGATCCCCC	d__Bacteria	0.753683
AGCGACGGGGTTCGTTTTGCGCTGTATTACATTTTTTCGCGGGGCGCGTACGAGGTGTGAAGAATCTCGTGAGCCTTGTGACTGCCGGGCTTATCGAAGT	d__Bacteria	0.925468
AGCGGAGGGGGCTAGTGTTACTCAACTTGACTGGGCGTAAAGGGCGTGAAGGTGGTACAGTACGTTTTTTTGTAAAAACTCAAACATAATTTGAGGATCT	d__Bacteria	0.98645
AGCGGCTGATGGGCTACGCGGCAGACTGGGCGAAGTTCACGCTCTGCGAAGCCTTTGCCCTGCATTTCGACAGCGAAGAGAACGTCGGCCCCATCGTGGC	d__Bacteria	0.834287
AGCGTAGGTCACAAGCGTTGTCCGGAATTACTGGGTGTAAAGGGAGCGCAGGCGGATTATTAAGTCAGTTGTGAAAGTTTGCGGCTCAACCGTAAAATTG	d__Bacteria	0.999996
AGCTCGTGAAATCTGCTACACCATACTATGATGATCTCGAAAAATTTCCTGCGCCGAAAAAGATCGTGGATATCTATTCAAAATCGCAGAATATGATGCT	d__Bacteria	0.868452
AGCTGCCTGAGCACATTATTGGTAGCGATATCCTCCACATAACGCAGCTTCCTGAGGATCAAGCCCTTGGACATGAGCTCAGCCTTGGCCTGCCTCATAG	d__Bacteria	0.816991
AGCTTTACAAGGCGGATAACGATACCGGCACAGCTCAGCGCACGGCAATAGGTCAGCGCGCGGACGGCACCGTTATAATGCTTGTAACCGACGGCCGCTC	d__Bacteria	0.809853
AGCTTTTCATTTCGACACATCATTAGATACCCGTGTAGTCCATGACGAGATCGGAGAGCACACGTCTGAACTCCAGTCACGACATAGTATCTCGTATGCC	d__Bacteria	0.714618
AGGAAATCGACTCCTTGCCCCAAGCGTTTACAGTGGCGCCAGAGACAACCTTGGTGTCGTCGGCACCTTCCACGAAGATCACTGCATCGTCAGCGATCTT	d__Bacteria	0.834629
AGGAAATGAGCCTTTGGCATGGCAACACAGAAATGCGCAAGCTGCTATAGATCGCGATATAGAAGTAGAGGAAAAGCTGAAAAAGTTTAACGAAAGCGGC	d__Bacteria	0.8406
AGGACACGAAGGCCACGGCAAAGAAAGCGCCCACCAGAGCCATTCCTTCCAGCGCGATGTTAAAGACGTTGGCCCGTTCACAGAGCATACCGCCCAGAGC	d__Bacteria	0.703755
AGGAGACCCAAAATAACTTTATAACGGCGTAAAGAGTGGTCACGTGCTATCCAAGTAGCTAAGATTAAAAAGCAGCTGAGCTGTCATAAGCCCAAGATGC	d__Bacteria	0.91356
AGGAGACCCAAATTAACCTCCTAACGGTGTAAAGAGTGGTCACATGTTATCCAAGTAGCTAAGATTAAAAAGCAACTGAGCTGTCACAAGGCCAAGATGC	d__Bacteria	0.767633
AGGAGACCCAAATTAACTTTATAACGGCGTAAGAGTGGTCACATGCTATCCAAGTAGCTAAGATTAAAAAGCAGCTAAGCTGTCATAAGCCCAAGATGCC	d__Bacteria	0.781786
AGGAGATGAAAGAACAGATTCGTCAACAGGCAGAGCAAAAAGCGGAAGACATCGAATCCTATGTAATGCTCAACTTTAAGTCTTATAGGGCGAAATCATC	d__Bacteria	0.892384
AGGAGATGAAAGGACAGATTCGTCAACAGGCAGAGCAAAAAGCGGAAGACATCGAATCCTATGTAATGCTCAACTTTAAGTCTTATAGGGCGAAATCATC	d__Bacteria	0.894395
AGGAGCTGGAACAGAAACTGGCGGAACAGGATACGCCGGAAGGCCTGATGGGACTGGAGGGCAATGTGCGAAAGCTTTATTATCAATCATGGCCGGTCTG	d__Bacteria	0.729224
AGGATAAGCGTAATTCATTATTACTAGGTGTATAGCGTCTGTAGGCGGCGGACCCCGCGTAGGCGGGCAGCTAGAGTGTTTAATAGGAAAGGGGAACTAA	d__Bacteria	0.862426
AGGATGCTAGCGTTATTCGGAATGAATGGGCGTAAAGAGTCTGTAGGTAGCTTAAAAAGTCTTTTGAGAAATATTTAGGCTTAACCTAAAAAGTTTAAGA	d__Bacteria	0.988187
AGGCAAATGAAGAAGAAAAACCCGAAGTCGTGCCCGAAAAACCCGTCGAAGTCAAAGAAGAGGTTGCGGCTCCCGCAGTGCCGCAAGCACCCGCAAAGAA	d__Bacteria	0.757993
AGGCGAAGTGGTAGGAATCGGCCTCGCTGACGCCGAGAGAGGCCTGAGCCCACTCCATGATCTTGATGGCAGCGGTCGGGGCGAACATGGCACCGATGTT	d__Bacteria	0.843696
AGGCGGTCGAAAACGTGGGGAATGTCCTCCCCGCTGATTGCACCTGTGTTCAGCACGGATATTTTTACGCGGTTCTCCTCAAGTTTTTCCGTGCAGAGCG	d__Bacteria	0.702511
AGGCTAATCGGAAACGCGTTATGAAAAAACAGCTGAAAAAACTGCGCAGGGAGGACATGTCCTATTATCTCAACGCACTCGGCTTCATCGAACGGGCGCG	d__Bacteria	0.709294
AGGGAAAGAGTGATTAGATACCCGTGTAGTCCATGACGAGATCGGAAGAGCACACGTCGAACTCCAGTCACGACATAGTATCTCGTATGCCGTCTTCTGC	d__Bacteria	0.712996
AGGGAGCTAGTGTTATTATGTTGACTGGGCGTAGGGTACGTAGGTGGTGAAATGAAAAAAAAATGAAATACTAGGTTATCATCTTTTCTGTTTTTTTAGT	d__Bacteria	0.929149
AGGGCAGAGGTTCTCACCTCAAGCTCCCAAACCTGGTAGGATCATTAACACTTTCGGTTTCCTATTCAAATAGCTGCGATCAAACCCCACATTTTCCATA	d__Bacteria	0.738867
AGGGCGACCCATTGGAGTTTTAAATTGGTGTAAAGGATACGTAGCCGGCCATAAAAATGGCTAGAGTCAAATAGAAGTAATTACAATACCTAGAGTAGGG	d__Bacteria	0.868206
AGGGGCAAGCGTTACTCGTACGTATTGGGCGTAAGGCGTCTGTAGGTGGTTATGATCAATAACTCATTTCTAGATTAGATAAAGATTTTCTTTGAGTAAA	d__Bacteria	0.990673
AGGGGGCTAGTGTTATTCGTGTTGACTGGGCGTAAAGGGTACGTAGGTGGCGAAGTGAGCTTTAAGTCAAAAACTGGCGTTGCGTCTTTTCGGCTTAACA	d__Bacteria	0.996816
AGGTCTTGATCTTGCCATCGGGCAGTTGACCGTAGAAGCCGGGGATCACCACTCCAATGCCATCCACCTGATTGCGCAGAGCCTCATAGCTGGACTCCTG	d__Bacteria	0.769304
AGGTGATTGAAAAGAAAACCATCGGCCCGACTTTGGGCGAAGACTCCATTAAATCCGGCTTAACGGCCTCTTTATTCGGCTTAATCCTGATTTTGGTTTT	d__Bacteria	0.720459
AGGTGGACGGACAAGTTTTCCATCGCCTCTGCGCCTCCTTCGGACATTTCCTTGAAAACAGCTTCAAAAATCGGACGGAACTCTGTTTTGCCCTTGCGTA	d__Bacteria	0.70999
AGGTTAATAAAAACTTTAAAGGGCTTTTAGTCGACGCGTTCTGTTCGACGCGTCGGCAGAGTGCGCCTCGCAAAGCGTGTAAGCCGAATTTCCTTTTTGT	d__Bacteria	0.826913
AGGTTACACGGGCTCCTTCCTCCACCCCGGCAATATCGGCTTCATCCACATCGGCCACCACCTGCATCTTGGTCAAGTCGGCAGCAATGGTGAACAGTGT	d__Bacteria	0.775562
AGTAGGATAAGCGTAATTCATTATTACTAGGTGTATAGCGTCTGTAGGCGGCGGACCCCGCGTAGGCGGGCAGCTAGAGTGTTTAATAGGAAAGGGGAAC	d__Bacteria	0.824372
AGTGATTAGAAACCCCAGTAGTCCATGACGAGATCGGAAGAGCACACGTCTGACTCCAGTCACGTCTATGAATCTCGTATGCCGTCTTCTGCTTGAAAAA	d__Bacteria	0.770851
AGTGATTAGAAACCCGAGTAGTCCATGACGAGATCCGGAAGAGCACACGTCTGAACTCCAGTCACCGAGAGTTATCTCGTATGCCGTCTTCTGCTTGAAA	d__Bacteria	0.800065
AGTGATTAGAAACCCGTGTAGTCCATGACGAGATCGGAAGAGCACACGTCTGACTCCAGTCACCGAGAGTTATCTCGTATGCCGTCTTCTGCTTGAAAAA	d__Bacteria	0.719335
AGTGATTAGAAACCCTGGTAGTCCATGACGAGATCGGAAAGAGCACACGTCTGAACTCCAGTCACCGAGAGTTATCTCGTATGCCGTCTTCTGCTTGAAA	d__Bacteria	0.772672
AGTGATTAGATACCCTAGTAGTCCATGACGAAGAGCACACGTCTGAACTCCAGTCACACTACGACATCTCGTATGCCGTCTTCTGCTTGAAAAAAAAAAA	d__Bacteria	0.737046
AGTGATTAGATACCCTAGTAGTCCATGACGAGATCGGAAGAGCACACGTCTGAACTCCCAGTCACGTCTATGAATCTCGTATGCCGTCTTCTGCTTGAAA	d__Bacteria	0.856401
AGTGTTAGAAACATTAGATACCCTTGTAGTCCATGACGAAATCGGAAGAGCACACGTCTGACTCCAGTCACGACATAGTATCTCGTATGCCGTCTTCTGC	d__Bacteria	0.839571
AGTTCGTCCGCTACCAGCCCACCTCCGTTGTCGCCGAAACCAAGGGGCTGTACAACTACCGCTATCTCGTGTTTGACGGGCTGGACATGACTGTCACCGA	d__Bacteria	0.726815
AGTTGCTACCTTTCCTAAGCTTGCGTAGGTGCGGTTAATCTCCCGTAAGTGGAACTAACAGCACATCGACCTCACTTGAGGTAATCACTCTTTTCGCCGA	d__Bacteria	0.885582
ATAAGCCCGTAAGGAATGCTTCCTCCGTCCGTTTTCCACCCGCCGAGATCGCGCGCGTTATCCGCGCCGTCAACGGTTATCGGTCTTACCGTTCCGCCGA	d__Bacteria	0.804716
ATACAGGAGACCCAAATTAACTTTATAACGGCGTAAAGAATGGTCACATGCTATCCAAGTAGCTAAGATTAAAAAGCAGCTGAGCTGTCATAAGCCCAAG	d__Bacteria	0.90198
ATACAGGAGACCCAAATTAACTTTATAACGGCGTAAAGAGTGGTCACATGCTATCCAAGTAGCTAAGATTAAGAAGCAGCTGAGCTGTCATAAGCCCAAG	d__Bacteria	0.971325
ATACATATTTTAGATATGCACTTCCTACAATTTTTGCGATGCCAGTTATGATAAGTATGTTTTTTAAAATAATTAGAAATGGTAAATAAAGCCATTTCTT	d__Bacteria	0.737916
ATACCTGCAGCAGGCAGCTTTGCTGCTGATCCTTGCAGGCGGCATCGGTGATCTGCTCGAACCGGTGGATGTGGATTTGAGAGGCTACACAATGATTGTG	d__Bacteria	0.768733
ATACGGAGAGGGCAAGTGTTATTCGCATTGACTGGGTGTAAAGGGTGCGTAGGTGGCTTGTTAAGTTTCAAAGTAAAGGTTAAACTCAAAGTTTAAAGGC	d__Bacteria	0.993557
ATAGAGAGGATCCATTGTGAATAATTGCCATTCTTCCATCGTCTTTTAATTTTTTAAGTCCGTTCAAATCAAACAACATTTGACCATCTGATATTTTAGG	d__Bacteria	0.702455
ATATACAGCCCATCCAGAAATATGACTTTAACCCTATATCTACCGTACGCCCCAGCATCTTGTCCGATTAGATACCCGTGTAGTCCGGCTGACTGACTGT	d__Bacteria	0.848791
ATATCACAAACACCGCTAAAAGACTGATTTCCACAAAATGGACAAAGGTTCTGTCTTCTTCGTTTTCTTCTTTGACCGGCGCCTTAAAGCCGCCGTCCGC	d__Bacteria	0.854801
ATATGACGAAGCAGTGAAAGCATTGGACAGCTTTGACGGAGACGACCAAATGGTAGCTCCTGCCATGAAAGGTGCTATGGGTAACTGCTATGCGCAGCTC	d__Bacteria	0.766938
ATCAGGTGGATGTTGTAGGGCTGAGCCTGCTGCATTTCGGCGATAGAGTCGACATAAATACGCAGCTTGGATAGCGGTGATTCCTTGCGCGCGCGGATGG	d__Bacteria	0.832888
ATCATAAAGCCGATGCAGAAAGCTGCGCGCATGTTCTTCGCGGTCTGATCAGCTACCACGAGCGGATGACGATGGGGAACTACCCGGAACGGGATTTCTA	d__Bacteria	0.785026
ATCCAACCTGCAGAGTTTATCGCTTCCATGACGCAGAAGTTAACACTTTCGGATATTTCTGATGAGTCGAAAAATTATCTTGATAAAGCAGGAATTACTA	d__Bacteria	0.822954
ATCCATATTAGATACCCGGGTAGTCCATGACGAAGAGCACACGTCTGAACTCCAGTCACTATAGCGAATCTCGTATGCCGTCTTCTGCTTGAAAAAAAAA	d__Bacteria	0.766388
ATCCATGACATTAGAAACCCGGGTAGTCCATGACGAGATCGGAAGAGACACGTCTGAACTCCAGTCACCGAGAGTTATCTCGTATGCCGTCTTCTGCTTG	d__Bacteria	0.792901
ATCTCGTCATGTGCCAGCAGCCGCGGTAACACGGAAGGGGCAAGCGTTACTCGTACGTATTGGGCGTAAAGGGTTGGTAGGTTTGAACCGCGGGGTCTGC	d__Bacteria	0.993465
ATCTGCTCAAATTTATGCGCGCTTCGATAAAAATGATTGGCGTATCCAACCTGCAGAGTTTTATCGCTTCCATGACGCAGAAGTTAACACTTTCGGATAT	d__Bacteria	0.797972
ATCTTAGCGAGAACTCTTAGCGCCGCTTGAGTGATCTCCATCGTATCGGAAGTTGGAGTGACGAGCGACTGGGAGGCTGCATTGCCATACTGCTCCAAAT	d__Bacteria	0.714164
ATGAGAACAACATATCCGAAGTCTTACGTCTGTAGTACTCGATGCTACCGGTTACACGGTTCCACAACTGGAACTCTGCACCGATATTGAAGTTAGTGTT	d__Bacteria	0.791433
ATGATACGGCACCACCATGGATGTGCAGATCACCGACGATCTGGACCCGCTGACCAAGGAAAACATGATGGACATGACCTTTGAGACCAGCGTCCTGTCC	d__Bacteria	0.74437
ATGATACGGCGACCATCCATACCTGATAAAATAGCTTTTTTAACGTCATCATCATAAGCATCAGCAGTAAATGCGATAATAGGAATATTTCTATCATCTC	d__Bacteria	0.774165
ATGATACGGCGACCTTCACTTGAAAAGTCGTTTGGGCATTCAGGCAACATGCCATAAAGATAGCCCCCAATGCCAAATAGATTCGTTTCATATTATAGCT	d__Bacteria	0.759229
ATGATACGGCGACTGGCTCGACTTCGCAGCCAACTCAATCGGAGCGACAGTCGGTGCGGTCGCAGGCGTAGGAATGGTGATGCTAAAGAGACGCCACCGA	d__Bacteria	0.73807
ATGATTGGCGTATCCAACCTGCAGAGTTTTATCGCTTCCATGACGCAGAAGTTAACACTTTCGGATATTTCTGATGAGTCGAAAAATTATCTTGATAAAG	d__Bacteria	0.727166
ATGCAACAATTCCCGTGTGATTTTCTGCCTGTTCCGAGCCTAACACATGAATATGCGGAATGGACTGCATACCACGCAGCAAATATTCTGTCAATTCCTG	d__Bacteria	0.854184
ATGCCAAATTTGCGCTCATCGTGGCTTTGGTTATCGTCATAGAATTTGCGAATATGTGCCTGTATATGCTGGGCGGGCTAATGCTGCGCAAAGTCCTAGC	d__Bacteria	0.795318
ATGCGCGCTTCGATAAAAATGATTGGCGTATCCAACCTGCAGAGTTTTATCGCTTCCATGACGCAGAAGTTAACACTTTCGGATATTTCTGATGAGTCGA	d__Bacteria	0.830929
ATGCTAGCGTTATTCGGAATGAATGGGCGTAAAGAGTCTGTAGGTAGCTTAAAAAGTCTTTTGAGAAATATTTAGGCTTAACCTAAAAAGTTTAAGAGAA	d__Bacteria	0.986372
ATGGCTTTGAAGTGCCGCAGATAGAACGCCTCAAAATCCCCCTGCATGGCTTCGCCTCCCTTTTCCCATAAAGTGATACGATTCAAGCGTACAAATTGTC	d__Bacteria	0.815638
ATGTGCCAGCAGCCGCGGTAATACAGGAGACCCAAATTAACTTTATAACGGCGTAAAGAGTGGTCACATGCTATCCAAGTAGCTAAGATTAAAAAGCAGC	d__Bacteria	0.875052
ATGTGTAGGGCTCAAACTGTTGATTTTCCACATCCGGCACTTCTTCCACCATCGGCTGCTCTTCCAGAAGAGAAAGCACCCGCTCCCCACTGGCCAGCGT	d__Bacteria	0.80399
ATTAACTTTATAACGGCGTAAAGAGTGGTCACATGCTATCCAAGTAGCTAAGATTAAAAAGCAGCTGAGCTGTCATAAGCCCAAGATGCCAATAAGGCCT	d__Bacteria	0.873283
ATTACAGGGTCGCGCAGGTTGATATTGGGCGACGCCATATCGATTTTTGCACGCAAAACCTTTTCACCGTCGGCATACTTGCCGTCTTTCATCGAGTTTA	d__Bacteria	0.797289
ATTAGAAACCCTGGTAGTCCATGACGAGATCGGAAAGCACACGTCTGAACTCCAGTCACTGAGTACGATCTCGTATGCCGTCTTCTGCTTGAAAAAAAAA	d__Bacteria	0.778333
ATTATACCCTGAACCGTTCTCCCCTCGGGCGTAACGTATCCGCCCAGATCGCGCACGTTGTGAATCCCGTCGATTTTCATCACCCGCGGTCCGAGATCCC	d__Bacteria	0.867825
ATTATACCCTGAACCGTTCTCCCCTCGGGCGTAACGTATCCGCCCAGATCGCGCACGTTGTGAATCCCGTCGATTTTCATCACCCGCGGTCCTAGATCCC	d__Bacteria	0.871648
ATTCGGACTTGAGGATCATAAGCACGGTCAGTGCGGCAAACAAAACAAATCCGATGATTCCGATCACAAGAAAGATCGGATGCAGCTTTACCACATTTTC	d__Bacteria	0.859355
ATTCGGCGGCGGCGGATACAAGGTTTCGGGCGGTCTCCATGGCGTAGGCGCATCCGTTGTAAATGCGCTTTCTGACTGGCTGGAGGTCGAAATCTGTCAG	d__Bacteria	0.89287
ATTGAACGCTGGCGGCATGCTTTACACATGCAAGTCGAACGGCAGCGAGGAGAAGCTTGCTTCTCTGTCGGCGAGTGGCGAACGGGTGAGTATAGCATCG	d__Bacteria	0.813392
ATTGCCTCTGTATCTCAAATGCATCTGAGAGACGTCCGAGCATCTTGTTGTAGGAGACGCTCAGCTGGTTCAGTTCTTTCACCTTATTTTCTTCGAGTCT	d__Bacteria	0.852301
ATTGGCAATTTCCTACAATCCCGCCAAAAAACGCATAGACGTAAAAGAAGTGTAATTGATATCCAACAAAAACAAGACCGCTGATTTTAGAACCAACGGT	d__Bacteria	0.76966
ATTTACCCCCCGATTTTTACGCATCATGGTAGAATGCAAAATATACCATAAAACCCTATATTTAGCCTTATAAAGCGGCATATAGCCAAAGACAATTTAG	d__Bacteria	0.7747
ATTTATGCGCGCTTCGATAAAAATGATTGGCGTATCCAACCTGCAGAGTTTTATCGCTTCCATGACGCAGAAGTTAACACTTTCGGATATTTCTGATGAG	d__Bacteria	0.79374
CAAAAGCGTGAGTTACGGAGGTAATGAAATGACAAGAAATGATGTTTTGAAGCTTTTCCCGGACGCAACGGATGAGCAGATAACAAATCTGCTTAACAAA	d__Bacteria	0.853032
CAAACACGTTGCCCTTTTCCGTGACTACGGGCGTGTACCCGAGGTCGGATACGATGTGGCACAGGCGTTTGACGACGTGCTCCGTGTAGCCCGTGGGGCT	d__Bacteria	0.898271
CAAACGAAGAATTCTGATTGAAATAATAGTAAGGCTTATAGCCCATAGTTTGCGAATTTCCTAAGCACTTGCCGCTCTGTGGTAGCCATATCAGCGAGAA	d__Bacteria	0.733312
CAAACGAAGGCTACGAAGTCGTCGAAATAAAATAACGACCGTTTCGAGGCTGTTGACAAAAAAATCCGCCGTGATATAATTAAATTATCTTTTTTATAGG	d__Bacteria	0.740511
CAAAGAGCAAAACTCCATCTCAAAAAAAGATTATATTTATTACAAGGCAGGGAATAAGAAAAGGGATTCACAAAACACTCAGTTGACAGATAATAGATTA	d__Bacteria	0.726183
CAAAGATATTGTTTACTGGCGTGATGTAGGAACCATCGACGCCTATTGGGAAGCAAATATGGATATAGCTTCCATTGAGCCTCAACTTGATATTTATGAC	d__Bacteria	0.864987
CAAATCTGCTCAAATTTATGCGCGCTTCGATAAAAATGATTGGCGTATCCAACCTGCAGAGTTTTATCGCTTCCATGACGCAGAAGTTAACACTTTCGGA	d__Bacteria	0.771471
CAAATGCTTAAACCGCTACCGTATGACAGAGGAAGAGCTGATAGAAACCGCCCGCCGCGGCGCGGAATTGGGCTTTAAGACCATTGTAATGCAGTCCGGC	d__Bacteria	0.931043
CAAATTAACTTTATAACGGCGTAAAGAGTGGTCACATGCTATCCAAGTAGCTAAGATTAAAAAGCAGCTGAGCTGTCATAAGCCCAAGATGCCAATAAGG	d__Bacteria	0.863991
CAAATTAACTTTATAACGGCGTAAAGAGTGGTCACATGCTATCCAAGTAGCTAAGATTAAAAAGCAGCTGAGCTGTCATGAGCCCAAGATGCCAATAAGG	d__Bacteria	0.816829
CAAATTTACATACCATCCGTCTGCACGAAAAAGATCATGGTTTTTCCATCGAGTTTTCCACCTTAAACTATGGAAACTGTAACCGAGTGAAATATGCCTA	d__Bacteria	0.84302
CAAATTTATGCGCGCTTCGATAAAAATGATTGGCGTATCCAACCTGCAGAGTTTTATCGCTTCCATGACGCAGAAGTTAACACTTTCGGATATTTCTGAT	d__Bacteria	0.820108
CAACAAGGTGTTTACAAAGGATTCCGGGGGCAGTTACGATACGGACAAGATCTACAAAGCAGTAAAGCGTTTTGCGGATGATTACAACTCCATGCTGGAT	d__Bacteria	0.753353
CAACATCGCCACGGTTACCCTTGGCAATCATTACCAAACTAGCGCCGTGATCCTGGAACTCGTCTACGTATGGGTCCATACGGTTGGCCGTGGTAGGTCC	d__Bacteria	0.87445
CAACATCGCCACGGTTACCCTTGGCAATCATTACCAAGCTAGCACCGTGATCCTGGAACTCATCTACGTATGGGTCCATACGGTTGGCTGTGGTAGGTCC	d__Bacteria	0.90604
CAACCGACGACTTTATGACAGCCGATTGGGCGAAGATACCGTACGATATTCTCGCCAAGGTTTCAAATCGTATCACAAATGAGGTAAAACACGTAAACCG	d__Bacteria	0.787662
CAACCGACGACTTTATGACAGCCGATTGGGCGAAGTTACCGTACGATATTCTCGCCAAGGTTTCAAATCGTATCACAAACGAGGTAAAACACGTAAACCG	d__Bacteria	0.866006
CAACCTGTGACGACAAATCTGCTCAAATTTATGCGCGCTTCGATAAAAATGATTGGCGTATCCAACCTGCAGAGTTTTATCGCTTCCATGACGCAGAAGT	d__Bacteria	0.706813
CAACGCGCCTCCATTGCCATGGCAAGATCATTGGCACGGCGAAATGCCGATACGAACAACGGAACCAGAATCGGAATCATGGCCTTTGCTCTCTGAATGA	d__Bacteria	0.906473
CAAGAGCGCGCAAGTGCATCTGCATTGTAGGAAGCGAACAGACATTTTACAATATGATTTCCAATGAAAATGAACAGAAGAGGTTCTCTTCACTTGATAT	d__Bacteria	0.860099
CAAGGGCGCGCAAGTGCATCTGCATTGTAGGAAGCGAACAGACATTTTACAATATGATTTCCAATGAAAATGAACAGAAGAGGTTTTCTTCGCTTGATAT	d__Bacteria	0.864227
CAAGGGGAGCAGGCGTTATTCATCATTATTGGGTGTAAAGGGTACGTAGGCTGTTTTTTTTAATTTCCATAAAATATTAAACTAAAGGTTTTTTATGTGG	d__Bacteria	0.92578
CAAGGGTGTTGTTTCCCGTGTGCTTCCGGTAGAGGATATGCCGTTCCTTCCGAACGGACGTCCGCTGGATATCGTGCTTAACCCGTTAGGCGTGCCGTCC	d__Bacteria	0.87039
CAAGGTGGACAAGAGCAAAGAGTGATCCAATAATTCAGAAATGAGGTATTTGATATGGTCGGCAAAAAAGAATATGAGCAGATCAACGAGCTGCTGAATG	d__Bacteria	0.730541
CAAGTAAGACGAGTGTTATTCATCATTATTAGGTTTAAAAGGTCACTAGACGGCATTTGTCACCGATGAAAAGGTCAATATTTTGCTAGAGTTTGATATG	d__Bacteria	0.725965
CAAGTAAGACGAGTGTTATTCATCATTATTAGGTTTAAAGAGTCACTAGACGGCATTTGTCACCGATGAAAAGGTCAATATTTTGCTAGAGTTTGATATG	d__Bacteria	0.771109
CAATACACTGAAAATGAGCGAAGATGACGGACAGACCTGGAAAAAGAAATTTTCATATACAGGTCCTGATTATGGTGGCTACTCAGACATTGCCCGGCAA	d__Bacteria	0.762977
CAATCTGACCCATCGTTCCCGTCCTGTCTGTACGGAGGATTTCTATCATTTTGATATGATCATCGGCATGGACGACCGTAATATAGAGGACCTGATGGAG	d__Bacteria	0.821328
CAATCTGACCCATCGTTCCCGTCCTGTCTGTACGGAGGATTTTTATCATTTTGATATGATCATTGGTATGGACGACCGTAATATAGAGGACTTGATGGAA	d__Bacteria	0.891156
CAATGTCACAATAGAATATGTGGTAGAGGAAGACGTAAAGCCCAATGCCAATGCCAACGCCAAGGACAAAAGCGGCTATTCGCTCAACCTTGAGAAACCC	d__Bacteria	0.871639
CACAACACTTCATGGATTTGGGACACGACATCAATGTGCACGACCTGACATACGAAAACTCGCAAGCCCGCGAACGTACGCAGATATTGATGGACGCTGC	d__Bacteria	0.771315
CACAAGTAAGACCAGTGTTATTCATCATTATTAGGTTTAAAGGGTCACTAGACGGCATTTGTAACCGATGAAAGGGTCAATATTTTGCTAGAGTTTGATA	d__Bacteria	0.958661
CACAAGTAAGACGAGTGTTATTCATCATTATTAGGTTTAAAGGGTCACTAGACGGCATTTGTCACCGATGAAAAGGTTAATATTTTGCTAGAGCTTGATA	d__Bacteria	0.871556
CACAAGTAAGACGAGTGTTATTCATCATTATTAGGTTTAAAGGGTCACTAGACGGCATTTGTCACCGATGGAAAGGTCAATATTTTGCTAGAGTTTGATA	d__Bacteria	0.925326
CACAAGTAAGACGAGTGTTATTCATCATTATTAGGTTTAAAGGGTCACTAGACGGCATTTGTCACCGATGGAAAGGTTAATATTTTGCTAGAGTTTGATA	d__Bacteria	0.91397
CACAAGTAAGACGAGTGTTATTCATCATTATTAGGTTTAGAGGGTCACTAGACGGCATTTGTCGCCGATGGAAAGGTCAATATTTTGCTAGAGTTTGATA	d__Bacteria	0.75807
CACACATTAGAAACCCGGGTAGTCCATGACGAGAAAGAGCACACGTCTGAACTCCAGTCACTAGTCTCCATCTCGTATGCCGTCTTCTGCTTGAAAAAAA	d__Bacteria	0.704422
CACACCGTAAACGTTGTATACTAGGTGTTAGCAGTTTATCTGCTAGTGCCGTAGCTAACGCATTAAGTATACCACCTGGGGAGTACGCCCGCAAGGGTGA	d__Bacteria	0.883952
CACACTGTAAACGATGGACACTAGATGTCGGACCGCAAGGTTCGGTGTCGCAGCTAACGCATTAAGTGTCCCACCTGGGAAGTACGGCCGCAAGGTTGAA	d__Bacteria	0.827325
CACACTGTAAACGTTGATGACTCGATGTTGGCGATACACAGCCAGCGTCCAAGAGCAATCGTTAAGTCATCCACCTGGGGAGTACGCCGGCAACGGTGAA	d__Bacteria	0.846947
CACACTGTCAACGATGTGCACTAGGTGCTGGGGCTGACGCTTCAGTGCCGGAGCTAACGCGGTAAGTGCACCGCCTGGGGAGTATGCTCGCAAGGGTGAA	d__Bacteria	0.884033
CACAGCACTTCATGGATTTGGGACACGACATCAATGTGCACGACCTGACATACGAAAACTCGCAAGCCCGCGAACGTACGCAGATATTGATGGACGCTGC	d__Bacteria	0.763962
CACAGCACTTCATGGATTTGGGACACGACATCAATGTGCACGACCTGACATACGAAAATTCGCAGGCCCGCGAACGTACGCAGATATTGATGGACGCTGC	d__Bacteria	0.718166
CACAGGGAACGAACATTACAATCTGTCTTTTGAACAATTATTATCTTGGTATGGTGCGCCAGATGCAGGAGCTGTTTTACGGAAAGCGTTACAGTGCCAC	d__Bacteria	0.728141
CACAGGTAAGACGAGTGTTATTCATCATTATTAGGTTTAAGGGTCACTAGACGGCATTTGTCACCGATGAAAAGGTCAATATTTTGCTAGAGTTTGATAT	d__Bacteria	0.750004
CACAGGTAGTGCAAACGTTTTTCATCGCTATTGGGTGTAAAGGATATGTAGACTGCTTGGAACTGAATTTTTTGTAAAATACTAGGGAAAGTCCTTTAGA	d__Bacteria	0.754363
CACAGGTAGTGCAAACGTTTTTCATCGCTATTGGGTGTAAAGGATATGTAGACTGCTTTGAACTGAATTTTTTGTAAAATACTAGGGAAAGTCCTTTAGA	d__Bacteria	0.732796
CACAGGTGGGATTGCGTTTTAAAATATTGAATAGGCATTAAGTGTGATTAGGTTGCCATGATCCTAACGTGCATTAGGTAGGCTTGAGTTCTAAGAGGAG	d__Bacteria	0.838721
CACAGGTGGGATTGCGTTTTAAATATTGAATAGGCATTAAGTGTGATTAGGTGGCGAATACTACGCTAGAGTCCTAAGAGGAGAGTTAGAGGAATAACCA	d__Bacteria	0.817106
CACATAACAGCAATACTTGCAAGCTCAACGTTCTGAGCCAGTGCTACAACGTCAAAATCGTATGTCTTGTCGGAGAATATATCCTGACCGTCCTTCATTT	d__Bacteria	0.716509
CACCGGCGACCCAACTTAACTTTATAACGTCGTACCGCGTGGTCCCATGCTATCCAGGTCGCTACGCTTCACCCTCCGCTGCGCTGTCCTACGCCCAAGA	d__Bacteria	0.84892
CACGATTAACCCAAGTCAATAGAAACCGGCGTAAAGAGTGTTTTAGATCAATTCCCCTCAATAAAGCTAAAATTCACCTGAGTTGTAAAAAACTCCAGTT	d__Bacteria	0.902125
CACGATTAACCCAAGTCAATAGAAACCGGCGTAAAGAGTGTTTTAGATCACCCCCTCCCCAATAAAGCTAAAACTCACCTGAGTTGTAAAAAACTCCAGT	d__Bacteria	0.885871
CACGATTAACCCAAGTCAATAGAAGCCGGCGTAAAGAGTGTTTAGATCACCCCCTCCCCAATAAAGCTAAAACTCACCTGAGTTGTAAAAAACTCCAGTT	d__Bacteria	0.701011
CACGATTAACCCAAGTCAATAGAAGCCGGCGTAAAGAGTGTTTTAGATCACCCCCGCCCCAATAAAGCTAAAACTCACCTGAGTTGTAAAAAACTCCAGT	d__Bacteria	0.801193
CACGATTAACCCAAGTCAATAGAAGCCGGCGTAAAGAGTGTTTTAGATCACCCCCTCCCAATAAAGCTAAAACTCACCTGAGTTGTAAAAAACTCCAGTT	d__Bacteria	0.716551
CACGATTAACCCAAGTCAATAGAAGCCGGCGTAAAGAGTGTTTTAGATCACCCCCTCCCCAATAAAGCTAAAACTCACCTGAGTTGTAAAAAACTCCAGT	d__Bacteria	0.755925
CACGATTAACCCAAGTCAATAGAAGCCGGCGTAAAGAGTGTTTTAGATCACCCCCTCCCCAATAAAGCTAAACCTCACCTGAGTTGTAAAAAACTCCAGT	d__Bacteria	0.743309
CACGATTAACCCAAGTCAATAGAAGCCGGCGTAAAGAGTGTTTTAGATCACCCCCTCCCCAATAAAGCTACAACTCACCTGAGTTGTAAAAAACTCCAGT	d__Bacteria	0.725612
CACGATTAACCCAAGTCAATAGAAGCCGGCGTAAAGAGTGTTTTAGATCACCCCCTCCCTAATAAAGCTAAAACTCACCTGAGTTGTAAAAAACTCCAGT	d__Bacteria	0.804239
CACGATTAACCCAAGTCAATAGAAGCCGGCGTAAAGAGTGTTTTAGATCACTCCCTCCCCAATAAAGCTAAAACTCACCTGAGTTGTAAAAAACTCCAGT	d__Bacteria	0.706362
CACGATTAACCCAAGTCAATAGAAGCTGGCGTAAAGAGTGTTTTAGATCACCCCCTCCCCAATAAAGCTAAAACTCACCTGAGTTGTAAAAAACTCCAGT	d__Bacteria	0.796837
CACGATTAACCCAAGTCAATCGAAGCCGGCGTAAAGAGTGTTTTAGATCACCCCCTCCCCAATAAAGCTAAAACTCACCTGAGTTGTAAAAAACTCCAGT	d__Bacteria	0.797116
CACGATTACCCCAAGTCAATAGAAGCCGGCGTAAAGAGTGTTTTAGATCACCCCCTCCCCAATAAAGCTAAAACTCACCTGAGTTGTAAAAAACTCCAGT	d__Bacteria	0.795373
CACGCAGTAAACGGTGAACACTAGGTGTAGCGGGTATTGACCCCCGCTGTGCCGAAGCTAACGCATTAAGTGTTCCGCCTGGGAAGTACGGCCGCAAGGT	d__Bacteria	0.973392
CACGCAGTAAACGGTGATCACTAGGTGTAGCGGGTATTGACCCCTGCTGTGCCGCAGTTAACGCATTAAGTGATCCGCCTGGGAAGTACGATCGCAAGGT	d__Bacteria	0.958588
CACGCCATAAACGATGAGAACTAGGTGTAGCGGGTATTGACCCCTGCTGTGCCGAAGTTAACGCATTAAGTTCTCCGCCTGGGGAGTACGGCCGCAAGGC	d__Bacteria	0.97626
CACGCCATAAACGATGAGGACTAGACGTTGAGAGGGTTAGCCTCCCAGTGTCGCAGCTAACGCGCTAAGTCCTCCGCCTGGGGAGTACGGCCGCAAGGTT	d__Bacteria	0.827701
CACGCCCTAAACGATGATCACTAGGTGTTGGGGAAGCGATTCCTTGGTACCGTAGCTAACGCGTGAAGTGATCCGCCTGGGGAGTACGGTCGCAAGGTTA	d__Bacteria	0.832312
CACGCCCTAAACGATGATCACTGGGTGTTCGGGGAGCGATCTCTGAGTACCGTAGCTAACGCGTGAAGTGATCCGCCTGGGGAGTACGGTCGCAAGATTA	d__Bacteria	0.936122
CACGCCCTAAACGATGCACACTTGGTGTGAGCCATTCATTTGGTTCGTGCCGGAGCTAACGCGTTAAGTGTGCCGCCTGGGGAGTACGGTCGCAAGGCTG	d__Bacteria	0.827201
CACGCCCTAAACGATGCATACTTGGTGTGAGCGATTCATTTCGTTCGTGCCGGAGCTAACGCGTTAAGTATGCCGCCTGGGGAGTACGGTCGCAAGGCTG	d__Bacteria	0.86494
CACGCCCTAAACGATGGATACTCGATGTCGGCCCGCAAGGGTCGGTGTCTAAGCTAACGCATTAAGTATCCCACCTGGGGAGTACGATCGCAAGGTTGAA	d__Bacteria	0.888009
CACGCCCTAAACGATGGATACTCGATGTCGGCTCGCAAGGGTCGGTGTCTAAGCTAACGCATTAAGTATCCCACCTGGGGAGTACGATCGCAAGGTTGAA	d__Bacteria	0.871033
CACGCCCTAAACGATGGGCACTAGGCGTCGCGGGTGTCGACCCCTGCGGTGCCGTAGCTAACGCGTTAAGTGCCCCGCCTGGGGAGTACGGTCGCAAGGC	d__Bacteria	0.829206
CACGCCCTAAACGATGGGCACTAGGTGTGGGAGGTATCGACCCCTTCCGTGCCGCAGCTAACGCATTAAGTGCCCCGCCTGGGGAGTACGGCCGCAAGGT	d__Bacteria	0.86571
CACGCCCTAAACGATGTCAACTGGTTGTTGGTGGGGTTAAACCCATTAGTAACGAAGCTAACGCATTAAGTGCCCCGCCTGGGGAGTACGGCCGCAAGGC	d__Bacteria	0.733224
CACGCCCTAAACGATGTCGACTGGGTGTCGGGAGAGAGATCTCTTGGTACCGTAGCTAACGCGTGAAGTCGACCGCCTGGGGAGTACGGCCGCAAGGTTA	d__Bacteria	0.802422
CACGCCCTAAACGATGTCGACTGGGTGTTCGGGGAGCGATCTCTGGGTACCGTAGCTAACGCGTGAAGTCGACCGCCTGGGGAGTACGGCCGCAAGGTTA	d__Bacteria	0.900467
CACGCCCTAAACGATGTCGACTGGTTGTTGGGGGTTTGACACCTTCAGTAACGAAGCTAACGCGTGAAGTCGACCGCCTGGGGAGTACGGCCGCAAGGTT	d__Bacteria	0.724732
CACGCCCTAAACGATGTCGACTGGTTGTTGGGGGTTTGACACTCTCAGTAACGAAGCTAACGCGTGAAGTCGACCGCCTGGGGAGTACGGCCGCAAGGTT	d__Bacteria	0.759513
CACGCCGTAAACGATGAACGCTAGCCGTTAGGCAGCTTGCTGCTTAGTGGCGCAGCTAACGCATTAAGCGTTCCGCCTGGGGAGTACGGCCGCAAGGTTG	d__Bacteria	0.96071
CACGCCGTAAACGATGAATACTAGGTGTAGGAGGTATCGACTCCTTCTGTGCCGCAGTTAACACAATAAGTATTCCGCCTGGGGAGTACGGTCGCAAGAT	d__Bacteria	0.834521
CACGCCGTAAACGATGAATACTAGGTGTGGGGGTTGTCATGACCTCCGTGCCGCCGCAAACGCATTAAGTATTCCGCCTGGGGAGTACGGCCGCAAGGTT	d__Bacteria	0.870351
CACGCCGTAAACGATGAATACTAGGTGTGGGGGTTGTCATGACCTCCGTGCCGCCGCTAACGCATTAAGTACCCCGCCTGGGGAGTACGGCCGCAAGGCT	d__Bacteria	0.880485
CACGCCGTAAACGATGAATGCCAGCCGTTAGTGGGTTTACTCACTAGTGGCGCAGCTAACGCTTTAAGCATTCCGCCTGGGGAGTACGGTCGCAAGATTA	d__Bacteria	0.824976
CACGCCGTAAACGATGAATGCTAGCCGTTGGGCAGCTTGCTGTTCAGTGGCGCAGCTAACGCATTAAGCATTCCGCCTGGGGAGTACGGCCGCAAGGTTG	d__Bacteria	0.952648
CACGCCGTAAACGATGAGCACTAGGTGTCGCGGGTATTGACCCCTGCGGTGCCGACGCTAACGCATTAAGTGCTCCGCCTGGGGACTACGGCCGCAAGGT	d__Bacteria	0.821282
CACGCCGTAAACGATGAGTACTAGCTGTCGGGGGTATCGACCCCTCCGGTAGCGCAGCTAACGCGATAAGTACTCCGCCTGGGGACTACGACCGCAAGGT	d__Bacteria	0.870339
CACGCCGTAAACGATGAGTACTAGGTGTAGGAGGTATCGACCCCTTCTGTGCCGAAGCTAACGCGATAAGTACTCCGCCTGGGGACTACGGCCGCAAGGT	d__Bacteria	0.856446
CACGCCGTAAACGATGAGTACTAGGTGTAGGGGGTATCGACCCCCTCTGTGCCGAAGCTAACGCGATAAGTACTCCGCCTGGGGACTACGGCCGCAAGGC	d__Bacteria	0.816482
CACGCCGTAAACGATGAGTACTAGGTGTCGGGGGTTACCCCCCTCGGTGCCGCAGCTAACGCATTAAGTACTCCGCCTGGGAAGTACGCTCGCAAGAGTG	d__Bacteria	0.747698
CACGCCGTAAACGATGAGTACTAGGTGTTGCGGGTATTGACCCCTGCAGTGCCGCAGCTAACGCATTAAGTACTCCGCCTGGGAAGTACGGTCGCAAGAC	d__Bacteria	0.850443
CACGCCGTAAACGATGGATGCTAGCCGTCGGCAAGCTTGCTTGTCGGTGGCGCAGCTAACGCATTAAGCATCCCGCCTGGGGAGTACGGCCGCAAGGTTA	d__Bacteria	0.884268
CACGCCGTAAACGATGGATGCTAGCCGTTGGACAGCTTGCTGTTCAGTGGCGCAGGTAACCCTTTAAGCATCCCGCCTGGGGAGTACGGTCGCAAGATTA	d__Bacteria	0.845943
CACGCCGTAAACGATGGATGCTAGCCGTTGGACAGCTTGCTGTTCAGTGGCGCAGGTAACCTTTTAAGCATCCCGCCTGGGGAGTACGGTCGCAAGATTA	d__Bacteria	0.83834
CACGCCGTAAACGATGGATGCTAGTCGTCGCGGGTATTGACCCCTGCGGCAACGCAGTTAACGCATTAAGCATCCCGCCTGGGGAGTACGGCCGCAAGGC	d__Bacteria	0.769951
CACGCCGTAAACGATGGGCACTAGGTGCTTGGGGGAGCGACCCTCTGAGTGCCGGCGCTAACGCATTAAGTGCCCCGCCTGGGGAGTACGGCCGCAAGGC	d__Bacteria	0.89574
CACGCCGTAAACGATGGGCACTAGGTGTAGGAGGTATTGACCCCTTCTGTGCCGAAGCTAACGCATTAAGTGCCCCGCCTGGGGAGTACGGCCGCAAGGC	d__Bacteria	0.932186
CACGCCGTAAACGATGGGCACTAGGTGTAGGAGGTATTGACCCCTTCTGTGCCGAAGTTAACGCATTAAGTGCCCCGCCTGGGGAGTACGGCCGCAAGGC	d__Bacteria	0.922145
CACGCCGTAAACGATGGGCACTAGGTGTAGGAGGTATTGACCCCTTCTGTGCCGAAGTTAACGCATTAAGTGCCCCGCCTGGGGAGTACGGCCGCAAGGT	d__Bacteria	0.930579
CACGCCGTAAACGATGGGCACTAGGTGTGAGGGGTATTGACCCCCTTCGTGCCAAAGCTAACGCGATAAGTGCCCCGCCTGGGGAGTACGGCCGCAAGGC	d__Bacteria	0.862269
CACGCCGTAAACGATGGGCACTAGGTGTGGGGGATCATAGACATCTTCCGTGCCGTAGCTAACGCACTAAGTGCCCCGCCTGGGGAGTACGGCCGCAAGG	d__Bacteria	0.806545
CACGCCGTAAACGATGGGCACTAGGTGTTCGGGGTATTGACCCCCTGAGTGCCGCAGCTAACGCATTAAGTGCCCCGCCTGGGGACTACGGCCGCAAGGC	d__Bacteria	0.859139
CACGCCGTAAACGATGGGCGCTAGGTGTAGGAGGTATTGACCCCTTCTGTGCCGAAGCTAACGCATTAAGTGCCCTGCCTGGGGAGTACGGCCGCAAGGC	d__Bacteria	0.959108
CACGCCGTAAACGATGGGTACTAGGCGTCGGGGGGAGCGACCCTCTCGGTGCCGTCGCTAACGCAGTAAGTACCCCGCCTGGGGAGTACGGCCGCAAGGC	d__Bacteria	0.710444
CACGCCGTAAACGATGGGTACTAGGTGTAGGGGTTTCGATACCCCTGTGCCGCCGTTAACACAATAAGTACCCCGCCTGGGGAGTACGGTCGCAAGATTA	d__Bacteria	0.820845
CACGCCGTAAACGATGGGTACTAGGTGTCGGCCCTTTTAGGGTCGGTGCCGAAGCTAACGCATTAAGTACCCCGCCTGGGAAGTACGGTCGCAAGGCTGA	d__Bacteria	0.736343
CACGCCGTAAACGATGGGTACTAGGTGTCTGGGGGAGCGACCCCCTGGGTGCCGGCGCTAACGCATGAAGTACCCCGCCTGGGGAGTACGGCCGCAAGGC	d__Bacteria	0.855373
CACGCCGTAAACGATGGGTGCTAGATGTCGGGGGGCTTGCCCTTCGGTGTCGTAGCTAACGCGTTAAGCACCCCGCCTGGGGAGTACGGCCGCAAGGTTA	d__Bacteria	0.861561
CACGCCGTAAACGATGGGTGCTAGGTGTCGCGGGCTTTGACCCCTGCGGTGCCGTAGCTAACGCATTAAGCACCCCGCCTGGGGAGTACGGCCGCAAGGC	d__Bacteria	0.879544
CACGCCGTAAACGATGGGTGCTAGGTGTGGGCGGTGTCGACTCCGTCCGTGCCGCAGCTAACGCATTAAGCACCCCGCCTGGGGAGTACGGCCGCAAGGC	d__Bacteria	0.823582
CACGCCGTAAACGATGGGTGCTTGGTGTCGGGGGTATCGACCCCTCCGGTGCCGAAGCTAACGCATTAAGCACCCCGCCTGGGGAGTACGGTCGCAAGGC	d__Bacteria	0.764904
CACGCCGTAAACGATGTGTGCTAGCCGTTGGGGCTCATAGAGCTTCGGTGGCGTCGCTAACGCTTTAAGCACACCGCCTGGGGAGTACGGTCGCAAGATT	d__Bacteria	0.791335
CACGCCGTAAACGATGTGTGCTAGGTGTTGGCCAGCGAGCTGGTCGGTGCCGCAGTTAACGCGTTAAGCACACCGCCTGGGGAGTACGGCCGCAAGGTTA	d__Bacteria	0.710357
CACGCCGTAAACGATGTTCACTAGATATTGGGAGTATTGACCCTTCCAGTGTCGCAGCTAACGCATTAAGTGAACCGCCTGGGGAGTACGGTCGCAAGAC	d__Bacteria	0.960137
CACGCCGTAAACGGTGAGCACTAGGTGTAGCGGGTATTGACCCCTGCTGTGCCGCAGCTAACGCATTAAGTGCTCCGCCTGGGGAGTACGGCCGCAAGGT	d__Bacteria	0.97152
CACGCCGTAAACGGTGGGTACTAGGTGTGGGTTTCCTTCCTTGGGATCCGTGCCGTAGCTAACGCATTAAGTACCCCGCCTGGGGAGTACGGCCGCAAGG	d__Bacteria	0.814176
CACGCCGTAAACGGTGGGTACTGGGTGTGGGAGGTGTAATGCCTTCTGTGCCGAAGCTAACGCGTTAAGTACCCCGCCTGGGGAGTACGGCCGCAAGGTT	d__Bacteria	0.771835
CACGCCGTAAACGTTGGGCACTAGGTGTGGGACTCTATCGACGGGTTCCGTGCCGTAGCTAACGCATTAAGTGCCCCGCCTGGGGAGTACGGCCGCAAGG	d__Bacteria	0.880898
CACGCCGTAAACGTTGGGCACTAGGTGTGGGGATCTATCGACGGTTTCCGTGCCGAAGCTAACGCATTAAGTGCCCCGCCTGGGGAGTACGGCCGCAAGG	d__Bacteria	0.896431
CACGCCGTAAACGTTGGGCACTAGGTGTGGGTCGTTATCAACGCGATCTGTGCCGAAGCTAACGCATTAAGTGCCCCGCCTGGGGAGTACGGCCGCAAGG	d__Bacteria	0.884982
CACGCCGTAAACGTTGGGCACTAGGTGTGGGTCTCAACCAACGAGATCCGTGCCGCAGCTAACGCATTAAGTGCCCCGCCTGGGGAGTACGGCCGCAAGG	d__Bacteria	0.885781
CACGCCGTAAACGTTGGGCGCTAGGAGTGGGGAACCTTCCACGTTCTCCGTGCCGCAGCTAACGCATTAAGCGCCCCGCCTGGGGAGTACGGCCGCAAGG	d__Bacteria	0.911517
CACGCCGTAAACGTTGGGCGCTAGGTGTGGGGTCCTTCCACGGATTCCGTGCCGCAGCTAACGCATTAAGCGCCCCGCCTGGGGAGTACGGCCGCAAGGC	d__Bacteria	0.895487
CACGCCGTAAACTATGAACACTAGGTGTGGGGGGTATCGACCCCCTCCGTGCCGAAGCTAACGCAATAAGTGTTCCGCCTGGGGAGTACGGCCGCAAGGC	d__Bacteria	0.755918
CACGCCGTAAACTATGAACGCTAGCCGTTGGCGAGCTTGCTCGTCAGTGGCGCAGCTAACGCATTAAGCGTTCCGCCTGGGGAGTACGGCCGCAAGGTTG	d__Bacteria	0.915633
CACGCCGTAAACTATGGACACTAGGTGTGGGGGGTATCGACCCCCTCCGTGCCGCAGCTAACGCAATAAGTGTCCCGCCTGGGGAGTACGGCCGCAAGGC	d__Bacteria	0.785465
CACGCCGTAAACTATGGACGCTAGCCGTTGGCGAGCTTGCTCGTCAGTGGCGCAGCTAACGCATTAAGCGTCCCGCCTGGGGAGTACGGCCGCAAGGTTG	d__Bacteria	0.87821
CACGCCGTAAACTATGGATGCTAGCCGTTGGGGAGCTTGCTCTTCAGTGGCACAGCTAACGTCTTAAGCATCCCGCCTGGGGAGTACGGTCGCAAGATTA	d__Bacteria	0.912315
CACGCCGTAAACTATGGATGCTAGCCGTTGGGGAGCTTGCTCTTCAGTGGCGCAGCTAACGTCTTAAGCATCCCGCCTGGGGAGTACGGTCGCAAGATTA	d__Bacteria	0.907616
CACGCCGTAAACTATGGGTGCTAGCCGTCGGGGAGCATGCTCTTCGGTGGCGCAGCAAACGCATTAAGCACCCCGCCTGGGGAGTACGGTCGCAAGATTA	d__Bacteria	0.824652
CACGCCGTAAACTATGGGTGCTAGCCGTCGGTCGGCATGCCGGTCGGTGGCGCAGCAAACGCATTAAGCACCCCGCCTGGGGAGTACGGTCGCAAGATTA	d__Bacteria	0.741936
CACGCCGTAAACTTTGGGCACTTGGTGTTGCGGGTATTGACCCCTGCAGTGCCGAAGCTAACGCATTAAGTGCCCCGCCTGGGGAGTACGGCCGCAAGGT	d__Bacteria	0.904381
CACGCCGTAAACTTTGGGTGCTAGGCGTCGCGGGTATTGACCCCTGCGGTGCCGCAGCTAACGCGTTAAGCACCCCGCCTGGGGAGTACGGTCGCAAGAC	d__Bacteria	0.779728
CACGCCTTAAACGATGGATGTTCGGTGTCGGCCCGTAAGGGTCGGTGCCTGAGCTAACGCGTTAAACATCCCACCTGGGGAGTACGATCGCAAGGTTGAA	d__Bacteria	0.820142
CACGCCTTAAACGATGGGTACTCGGTGCTGGGCCGCAAGGTTCAGTGCCAAAGCTAACGCATTAAGTACCCCACCTGGGGAGTACGATCGCAAGGTTGAA	d__Bacteria	0.843703
CACGCCTTAAACGATGGGTACTCGGTGCTGGGCCGTAAGGTTCAGTGCCAAAGCTAACGCATTAAGTACCCCACCTGGGGAGTACGATCGCAAGGTTGAA	d__Bacteria	0.850044
CACGCCTTAAACTATGGATACTAGATGTCGGGAGCTCTTACCCTCCCGGTGTCGCAGCTAACGCGTTAAGTATCCCGCCTGGGGAGTACGGCCGCAAGGT	d__Bacteria	0.842873
CACGCCTTAAACTATGGATACTAGGTATGGGGGGTATCGACCCCCTCCGTGCCAAAGTTAACACCTTAAGTATCCCGCCTGGGGAGTACGGTCGCAAGAC	d__Bacteria	0.72886
CACGCGGTAAACGATGGGCACTAGGTGTAGGAGGTATTGACCCCTTCTGTGCCGAAGCTAACGCATTAAGTGCCCCGCCTGGGGAGTACGGCCGCAAGGC	d__Bacteria	0.916854
CACGCGGTAAACGATGTGTGCTAGACGTTGGGGAGCCTAGCTCTTCGGTGTCGCAGCTAACGCTTTAAGCACACCGCCTGGGGAGTACGGCCGCAAGGTT	d__Bacteria	0.738341
CACGCTGTAAACGATGAACACTTGGTGTGGAGGGAGTTGACCCCTTCCGTGCCGGAGCTAACGCGTTAAGTGTTCCGCCTGGGGAGTACGGTCGCAAGGC	d__Bacteria	0.86804
CACGCTGTAAACGATGAATACTAGGTGTTGGTACTTAAGTATCAGCGCCGCAGCTAACGCATTAAGTATTCCACCTGGGGAGTACGATCGCAAGGTTGAA	d__Bacteria	0.796529
CACGCTGTAAACGATGAATGCTAGCCGTTGGCGAGCTTGCTCGTCAGTGGCGCAGCTAACGCTTTAAGCATTCCGCCTGGGGAGTACGGTCGCAAGATTA	d__Bacteria	0.814974
CACGCTGTAAACGATGAGAGCTAGTTGTCGGCACGCATGCGTGTCGGTGACGCAGCTAACGCATTAAGCTCTCCGCCTGGGGAGTACGGCCGCAAGGTTA	d__Bacteria	0.810682
CACGCTGTAAACGATGAGAGCTAGTTGTCGGCGCGCATGCGTGTCGGTGACGCAGCTAACGCATTAAGCTCTCCGCCTGGGGAGTACGGCCGCAAGGTTA	d__Bacteria	0.767155
CACGCTGTAAACGATGAGCACTAGGTGTAGCGGGTACTCATTCCTGCTGTGCCGCAGCTAACGCGTTAAGTGCTCCGCCTGGGGATTACGGTCGCAAGAC	d__Bacteria	0.841195
CACGCTGTAAACGATGAGCACTAGGTGTAGCGGGTACTCATTCCTGCTGTGCCGTAGCTAACGCGATAAGTGCTCCGCCTGGGGATTACGGTCGCAAGAC	d__Bacteria	0.799197
CACGCTGTAAACGATGAGCACTAGGTGTAGCGGGTACTCATTCCTGCTGTGCCGTAGCTAACGCGTTAAGTGCTCCGCCTGGGGATTACGGTCGCAAGAC	d__Bacteria	0.83089
CACGCTGTAAACGATGAGCACTAGGTGTCGCGGGTATTGACCCCTGCGGTGCCGACGCTAACGCATTAAGTGCTCCGCCTGGGGAGTACGGTCGCAAGAT	d__Bacteria	0.811235
CACGCTGTAAACGATGAGTGCTAGATGCTGTGGGTATTGACCCCCGCGGTGTCGCAGCCAACGCGTTAAGCACTCCGCCTGGGGAGTACGGCCGCAAGGC	d__Bacteria	0.835793
CACGCTGTAAACGATGGATGCCAGCCGTTGGGGAGCTTGCTCTTCAGTGGCGCCGCTAACGCATTAAGCATCCCGCCTGGGGAGTACGGTCGCAAGATTA	d__Bacteria	0.849348
CACGCTGTAAACGATGGATGCTAGCCGTTGGCGAGCTTGCTCGTCAGTGGCGCAGCTAACGCTTTAAGCATCCCGCCTGGGGAGTACGGTCGCAAGATTA	d__Bacteria	0.806601
CACGCTGTAAACGATGGATGCTAGCCGTTGGGGAGCTTGCTCTTCAGTGGCGCAGCCAACGCTTTAAGCATCCCGCCTGGGGAGTACGGTCGCAAGATTA	d__Bacteria	0.785274
CACGCTGTAAACGATGGATGCTAGCCGTTGGGGAGCTTGCTCTTCAGTGGCGCAGCTAACGCTTTAAGCATCCCGCCTGGGGAGTACGGTCGCAAGATTA	d__Bacteria	0.856643
CACGCTGTAAACGATGGATGCTAGCCGTTGTCGGGTTTACTCGTCAGTGGCGCAGCTAACGCATTAAGCATCCCGCCTGGGGAGTACGGTCGCAAGATTA	d__Bacteria	0.843849
CACGCTGTAAACGATGGGAACTAGGTGTGAGAGGTTAGATCCTCTCGTGCCGCCGCTAACGCATTAAGTTCCCCGCCTGGGGATTACGGCCGCAAGGTTA	d__Bacteria	0.844332
CACGCTGTAAACGATGGGCACTAGGTGTCCCGGGTATTGACCCCCTGGGTGCCGCAGCTAACGCATTAAGTGCCCCGCCTGGGGAGTACGGTCGCAAGAT	d__Bacteria	0.912075
CACGCTGTAAACGATGGGCACTAGGTGTCCGGGGTATTGACCCCCTGGGTGCCGCAGCTAACGCATTAAGTGCCCCGCCTGGGGAGTACGGTCGCAAGAC	d__Bacteria	0.882694
CACGCTGTAAACGATGGGCACTAGGTGTGGGGGGTGTCGACTCCCCCCGTGCCGAAGCTAACGCATTAAGTGCCCCGCCTGGGGAGTACGGCCGCAAGGC	d__Bacteria	0.885902
CACGCTGTAAACGATGGGCACTAGGTGTTCGGGGTATTGACCCCCTGAGTGCCGCAGCTAACGCATTAAGTGCCCCGCCTGGGGACTACGGCCGCAAGGC	d__Bacteria	0.816739
CACGCTGTAAACGATGGGCGCTAGGTGTGGGGGGTTTTTAATCCCTCCGTGCCGCAGCTAACGCATTAAGCGCCCCGCCTGGGGAGTACGGCCGCAAGGT	d__Bacteria	0.905265
CACGCTGTAAACGATGGGCGCTAGGTGTGGGGGGTTTTTAATCCCTCCGTGCCGCAGTTAACGCATTAAGCGCCCCGCCTGGGGAGTACGGCCACAAGGT	d__Bacteria	0.745183
CACGCTGTAAACGATGGGCGCTAGGTGTGGGGGGTTTTTGATCCCTCCGTGCCGCAGTTAACGCATTAAGCGCCCCGCCTGGGGAGTACGGCCGCAAGGT	d__Bacteria	0.810891
CACGCTGTAAACGATGGGTACTAGGTGTCGCGGGTGTTGACCCCCGCGGTGCCGCAGCTAACGCATTAAGTATCCCGCCTGGGGATTACGGTCGCAAGAT	d__Bacteria	0.836423
CACGCTGTAAACGATGTCAACTGGGTGTCGGTAGCTTTACGCTATCGGTGCCGAAGCAAACGCGTTAAGTTGACCGCCTGGGGACTACGGCCGCAAGGCT	d__Bacteria	0.790854
CACGCTGTAAACGATGTGCACTAGGCGTGGGGCACGTACGTGCTCTGTGCCGTAGCTAACGTGTTAAGTGCACCGCCTGGGGAGTATGCTCGCAAGGGTG	d__Bacteria	0.848206
CACGCTGTAAACGATGTGCACTAGGTGTCGGGGGTATTGACCCCCCCGGTGCCGCCGCTAACGCATTAAGTGCACCGCCTGGGAAGTACGGCCGCAAGGT	d__Bacteria	0.813113
CACGCTGTAAACGATGTTCACTAGGTGTTGGGGGTATTGCCCCTTTCAGTGCCGCAGCTAACGCATTAAGTGAACCGCCTGGGGAGTACGGTCGCAAGAT	d__Bacteria	0.790163
CACGCTGTAAACGGTGAATACTGGGTGTGGGAGGTGTAATGCCTTCTGTGCCGAAGCTAACGCGTTAAGTATTCCGCCTGGGGAGTACGGCCGCAAGGTT	d__Bacteria	0.862644
CACGGAAGGGGCAAGCGTTACTCGTACGGACTGGGTGTAAAGCGTTTGTAGGTGAAACCCCGACGGGGGGGTACCGGGTGAGAACCCCGCCGTGCCCCCC	d__Bacteria	0.967551
CACGGAAGGGGCAAGCGTTACTCGTACGTATTGGGCGTAAGGCGTCTGTAGGTGGTTATGATCAATAACTCATTTCTAGATTAGATAAAGATTTTCTTTG	d__Bacteria	0.991899
CACGGAAGGGGCAAGCGTTACTCGTACGTATTGGGCGTAAGGCGTCTGTAGGTGGTTATGATCAGTAACTCATTTCTAGATTAGATAAAGATTTTCTTTG	d__Bacteria	0.993558
CACGGAAGGGGCGAGCATTACTCGTAAGTACTGGGCGTAAGGGGTTTGTAGGCGGTTAACTTGAAATAAGTTAACTAGTAAGTGTGTTAACTGGTGTTAT	d__Bacteria	0.967499
CACGGAAGGGGCGAGCGTTACTCGTAAGTACTGGGCGTAAGGGGTTTGTAGGCGGTTAACTTGAAATAAGTTAACTAGTAAGTGTGTTAACTGGGGTTAT	d__Bacteria	0.989196
CACGGAAGGGGCGAGCGTTACTCGTAAGTACTGGGCGTAAGGGGTTTGTAGGCGGTTAACTTGAAATAAGTTAACTAGTAAGTGTGTTAACTGGTGTTAT	d__Bacteria	0.990201
CACGGAAGGGGCGAGCGTTACTCGTACGTATTGGGCGTAAGGCGTCTGTAGGTTGTTATTTTTAATAACTAGTCCTGGTTTAGCAAAGTTACTTTTTTGA	d__Bacteria	0.971737
CACGGAAGGGGCGAGCGTTACTCGTACGTATTGGGCGTAGGGCGTCTGTAGGTTGTTATTTTTAATAACTAGTCCTGGTTTAGCAAAGTTACTTTTTTGA	d__Bacteria	0.976437
CACGGAAGGGGTAAGCGTTACTCGTACGTATTGGGCGTAGGGCGTCTGTAGGTGGTTATGATCAGTAACTCATTTCTAGATTAGATAAAGATTTTCTTTG	d__Bacteria	0.977574
CACGGAGGGGGCGAGCGTTACTCGTACGTATTGGGCGTAAAGCGTTTGTAGGCGGCCGTTTCTCAGAACGGCTCGGTGATTCGAACGACCCCGACGGATT	d__Bacteria	0.997306
CACGGAGGGGGCGAGCGTTACTCGTACGTATTGGGCGTAAGGCGTTTGTAGGCGGCCGTTTCTCAGAACGGCTCGGTGATTCAAACGACCCCGACGGATT	d__Bacteria	0.99123
CACGGATGGAACAAGTGTTATTCACATTAACTAGGTGTAAAGGGCTTTCAGGTGGTCGGGTAGTGTTTTTTCTAAAAGGCTGGGACTTAATCCTTTGGCT	d__Bacteria	0.82876
CACGGGGGATGCGAGCGTTATCCGGAATTATTGGGTTTAAAGGGTGCGTAGGCGGTTTGTCAAGTTGGAAGCGTAATCCCGGGGCTTAACTCCGGTGCTA	d__Bacteria	0.999981
CACGTAAGGCGCGAGCGTTGTTCGGAATCATTGGGCGTAAAGGGCGTGCAGCCGGGAGAGCAAGTCAGATGTGAAATCCATGGGCTTAACCCATGAACTG	d__Bacteria	0.999949
CACGTAAGGCGCGAGCGTTGTTCGGAATCATTGGGCGTAAAGGGCGTGTAGGCGGCCTCCTGGACAGACACTGACACTGAGGTGCGAAAGCGTGGGGAGC	d__Bacteria	0.999999
CACGTAAGGCGCGAGCGTTGTTCGGAATCATTGGGCGTAAAGGGCGTGTAGGCGGGACTGCAAGTCAGATGTGAAAACTATGGGCTCAACTCATAGCTTG	d__Bacteria	0.999997
CACGTAAGGGGCGAGCGTTGTCCGGAATTACTGGGCGTAAAGGGCGCGCAGGCGACCTTTTAGGCCTCGTGTCAAAGCCCCGGGCTCACCCCGGGAGTGC	d__Bacteria	0.999928
CACGTAAGGTGCGAGCGTTGTTCGGAATTATTGGGCGTAAAGGGAGCGCAGGCGGTCTGGCAAGTCTGATGTGAAAACCCGGGGCTCAACCCCGGGACTG	d__Bacteria	0.999999
CACGTAAGGTGCGAGCGTTGTTCGGAATTATTGGGCGTAAAGGGCATGTAGGCGCCCAACGTCTGCACTGCAGCGCGAACTGCCCCACTTGAGTGCGCGC	d__Bacteria	0.999993
CACGTAAGGTGCGAGCGTTGTTCGGGATTATTGGGCGTAAAGGGCATGTAGGCGGATATTTAAGTGGGATGTGAAATACCCGAGCTTAACTTGGGAGCTG	d__Bacteria	0.999988
CACGTAGGGGGCGAGCGTTGTCCGGATTCATTGGGCGTAAAGGGCGCGCAGGCGGCCCGGCAAGCGGTGCCTCTAAGCCCGGGGCTCCACCCCGGGACGG	d__Bacteria	0.999981
CACGTAGGTCCCAAGCGTTGTCCGGAATTACTGGGTGTAAAGGGAGCGCAGGCGGTTTGATAAGTTAGAGGTGAAATCCCGGGGCTTAACTCCGGAACTG	d__Bacteria	0.999907
CAGAAACATCTGCAGGTAAAGCTTACGTTATCATCGAGGCTGAATACTTGGGTGTAAAAGGTTACTATAAAGTGGGGCTTTACAAGGATGCAACAACCAA	d__Bacteria	0.715892
CAGAAAGGGCGACCCATTGGAGTCTTAAATTGGTGTAAAGGATACGTAGCCGGCCGTAAAAATGGCTAGAGTCAAATAGAAGTAATTACAATACCTAGAG	d__Bacteria	0.843499
CAGAAAGGGCGACCCATTGGAGTTTTAAATTGGCGTAAAGGATACGTAGCCGGCCGTAAAAATGGCTAGAGTCAAATAGAAGTAATTACAATACCTAGAG	d__Bacteria	0.926978
CAGAAAGGGCGACCCATTGGAGTTTTAAATTGGTGTAAAGGATACGTAGCCGGCCGTAAAAATGGCTAGAGTCAAATAGAAGTAATTACAATACCTAGAG	d__Bacteria	0.83018
CAGACGAGATCATAACAGAGCCTGCAAGCGACTTTCCGAACTTTTCTCCGCCGTGCTTTATCGTCCTTGCGTACTTACTGCCGTCCACCTTGTAGTAGAG	d__Bacteria	0.849506
CAGAGCGTTTGAGATTTACAAGAAGACTTGTCCGTCCTATATCGAGGACATAAGTGAGATTCATTGCACAGAGCCGTACATATATTCACAGATGGTTGCA	d__Bacteria	0.769636
CAGATGAGGTCAGCCACACCGTAGCCGTCTGAGAAATGGGCTACCAGCAGCTTGTTGCGCTTGCCGGTATCTATCTCATCGTAGCTGAGTATCTTGCCTT	d__Bacteria	0.737241
CAGCAGCCGCGGTAATACAGGAGACCCAAATTAACTTTATAACGGCGTAAAGAGTGGTCACATGCTATCCAAGTAGCTAAGATTAAAAAGCAGCTGAGCT	d__Bacteria	0.903706
CAGCCGCGGTAATACAGGAGACCCAAATTAACTTTATAACGGCGTAAAGAGTGGTCACATGCTATCCAAGTAGCTAAGATTAAAAAGCAGCTGAGCTGTC	d__Bacteria	0.895841
CAGCGAAGAAGTCAAAGACGGCACCGATGGTACCCACATGACAATGGATATTCAACTCATTCCAATGAGAGTACGTCCACTTCTCCTGCTTAGGAGCCGT	d__Bacteria	0.851331
CAGCGGTTCTTTGGCAAAATCTCGCACCGGAAAGCATACCGCAAACCGGACGCACACTGCAGGAGGCGCAAGCGCCAATCATGGCTTCATAACACTCCTG	d__Bacteria	0.817363
CAGCGTTGAGATCCACGTCTTTCCAGAGGGAATCTGTGACCTCAGCATCGCTCTGCGCGAAACTTTCTAGCGAGCAGACGAGCAGAGTACTCATCAAAAT	d__Bacteria	0.829622
CAGGAGACCCAAATTAACTTTATAACAGCGTAAAGAGTGGTCACATGCTATCCAAGTAGCTAAGATTAAAAAGCAGCTGAGCTGTCTTAAGCCCAAGATG	d__Bacteria	0.86349
CAGGAGACCCAAATTAACTTTATAACGGCGTAAAGAGTGATCACATGCTATCCAAGTAGCTAAGATTAAAAAGCAGCTGAGCTGTCATAAGCCCAAGATG	d__Bacteria	0.88719
CAGGAGACCCAAATTAACTTTATAACGGCGTAAAGAGTGGTCACATGCTATCCAAGTAGCTAGGATTAAAAAGCAGCTGAGCTGTCATAAGCCCAAGATG	d__Bacteria	0.915565
CAGGAGACCCAAATTAACTTTATAACGGCGTAAAGAGTGGTCACATGCTATCCAAGTGGCTAAGATTAAAAAGCAGCTGAGCTGTCATAAGCCCAAGATG	d__Bacteria	0.886162
CAGGAGACCCGAATTAACTTTATAACGGCGTAAAGAGTGGTCACATGCTATCCAAGTAGCTAAGATTAAAAAGCAGCTGAGCTGTCATAAGCCCAAGATG	d__Bacteria	0.914269
CAGGGCAGAGGTTCTCACCTCAAGCTCCCAAACCTGGTAGGATCATTAACACTTTCGGTTTCCTATTCAAATAGCTGCGATCAAACCCCACATTTTCCAT	d__Bacteria	0.728743
CAGGTACAATCCCACGGACAATGCCGCATAGGAAGGAATCTCCCCATAGACGAAGGAGCAAACAGGATTAGAAACCCCAGTAGTCCGGCTGACTGACTGT	d__Bacteria	0.952791
CAGGTACAATCCCACGGACAATGCCGCATAGGAAGGAATCTCCCCATAGACGAAGGAGCAAACAGGATTAGAAACCCCTGTAGTCCGGCTGACTGACTGT	d__Bacteria	0.951457
CAGGTACAATCCCACGGACAATGCCGCATAGGAAGGAATCTCCCCATAGACGAAGGAGCAAACAGGATTAGAAACCCGGGTAGTCCGGCTGACTGACTGT	d__Bacteria	0.962548
CAGGTACAATCCCACGGACAATGCCGCATAGGAAGGAATCTCCCCATAGACGAAGGAGCAAACAGGATTAGATACCCCTGTAGTCCGGCTGACTGACTGT	d__Bacteria	0.942421
CAGGTACACTCCCACGGACAATGCCGCATAGGAAGGAATCTCCCCATAGACGAAGGAGCAAACAGGATTAGATACCCCTGTAGTCCGGCTGACTGACTGT	d__Bacteria	0.947628
CAGGTATGCTCCTTGCGTTCAACCTTCCCGTCACATTGCCTTTTTATATGGCAATCATCGGTTGCTTTGTGGCAATAGTGATAGTAAAACAGTTCTTCGG	d__Bacteria	0.883222
CAGGTGATATAGATGCCGTTGACAAAAGAGAACCCCAGGAACAGGAAGAAGCTGGCTACAGCCTCACTTGCCGGCAGAAGATAGATGAACACCGGAAGCG	d__Bacteria	0.780648
CAGGTGATATAGATGCCGTTGACAAAAGAGAACTCCAAGAACAGGAAGAAGCTGGCTACAGCCTCACTTGCCGGCAGGAGATAGATGAACACCGGAAGCG	d__Bacteria	0.802364
CAGGTGATATAGATGCCGTTGACAAAAGAGAACTCCAGGAACAGGAAGAAGCTGGCTACAACCTCACTTGCCGGCAGGAGATAGATGAACACCGGAAGCG	d__Bacteria	0.821917
CAGGTGATATAGATGCCGTTGATGAAAGAGAACCCCAGGAACAGGAAGAAGCTGGCTACAGCCTCACTTGCCGGCAGGAGATAGATGAACACCGGAAGCG	d__Bacteria	0.793614
CAGGTGATGTAGATGCCGTTGACAAAAGAGAACTCCAGGAACAGGAAGAAGCTGGCTACAGCCTCACTTGCCGGCAGGAGATAGATGAACACCGGAAGCG	d__Bacteria	0.808339
CAGGTGGGATTGCGTTTTAAAATATTGAATAGGCATTAAGTGTGATTAGGTTGCCAGGATCCTAACGTGCATTAGGTAGGCTTGAGTTCTAAGAGGAGAG	d__Bacteria	0.807771
CAGTTATCTAAATCTGCTAAGTCTTGTTGAGAGCAGAGTAGGATACTAACAGTTCGCTCTGCTCAACAGCGATGCTTTCACCGTGATGATATTCCTATAA	d__Bacteria	0.766441
CATAATCCTTGAGCCAGCAAAGCCTTGAAACTGCAAGTTCAAATTCGTATCTTGGACTTAGCGAGTAGCGAACATCTCTGTAAAGCTGCATGAAAATTCC	d__Bacteria	0.903394
CATAGGGAAAGAGTATTAGAAACCCCAGTAGTCCATGACGAGATCAGAAGAGCCACACGTCTGAACTCCAGTCACCGAGCGACATCTCGTATGCCGTCTT	d__Bacteria	0.837014
CATATAGAGAAATGGCGCCCAGGAGAAATGGGTGATGGTATCGAAGCTTACCGGACAGGAGAACCACGAAGCCGCTGCTACATCCGAGAAATCTACCTCG	d__Bacteria	0.738001
CATCAATGCCGGTATTGCTGCCGCCAAGCAGATCAATGCGTTCTTCAAGGACGGCTGCACAAAATATCAAGTAAACAAATAATTTTAGGATATAAGAGAG	d__Bacteria	0.700086
CATCAGCGAACTTCTGAGCTCCCTCATCGGTGAATGCAAGCTGTACCACATTGTCATTGCCGTTATCTGAGTCAATTCCGGCTGTGGCATTCTTGATGTC	d__Bacteria	0.753098
CATCGAGGAAAATGTCAGCACCAGCGGCAAGGTAGTCAGTGAGGAGAAAGCGGTTCTCTTTGCGCCGGTAGGCGGCAGATTAAACGAAGTCAATGTGGCA	d__Bacteria	0.946864
CATCGTAACATAATAATCTTTTTCGATTGCCTGTACCATAACACCAGTCTGCTCATAGGCCAAGTCAATCGCATCCCGGAATTGTTCTCTATCACTGTGC	d__Bacteria	0.851356
CATCGTCCACACATAAGTAATTATAAGTAGGTATTCAAAATTAGTTTATACTGCCCATGCAGGCAAGAAAGCGCGGAGAATTTTGTATCTTCGCACCATC	d__Bacteria	0.775325
CATCTTGCTTCCATTGCCATCGCCAAATCATTTGCCCGTCGAAATGCTGACACAAACAAAGGCACCAAAATCGGGATCATGCTTTTTGCTTTTTGAACTA	d__Bacteria	0.755619
CATGCGGAAGAAAGCCCACAGACACATGTCGGGGGTCTCCGTATGGGCGTGTATCACGTCGGGTCTGTAGCGCAGCCATACCATCAGAAAGCGCAGCGGA	d__Bacteria	0.902828
CCAAATTAACTTTATAACGGCGTAAAGAGTGGTCACATGCTATCCAAGTAGCTAAGATTAAAAAGCAGCTGAGCTGTCATAAGCCCAAGATGCCAACAAG	d__Bacteria	0.901247
CCAAATTAACTTTATAACGGCGTAAAGAGTGGTCACATGCTATCCAAGTAGCTAAGATTAAAAAGCAGCTGAGCTGTCATAAGCCCAAGATGCCAATAAG	d__Bacteria	0.8827
CCAAATTAACTTTATAACGGCGTAAAGAGTGGTCACATGCTATCCAAGTAGCTAAGATTAAAAAGCAGCTGAGCTGTCATAGGCCCAAGATGCCAATAAG	d__Bacteria	0.861823
CCAAATTAACTTTATAACTGCGTAAAGAGTGGTCACATGCTATCCAAGTAGCTAAGATTAAAAAGCAGCTAAGCTGTCATAAGCCCAAGATGCCAATAAG	d__Bacteria	0.795648
CCAACCTGCAGAGTTTTATCGCTTCCATGACGCAGAAGTTAACACTTTCGGATATTTCTGATGAGTCGAAAAATTATCTTGATAAAGCAGGAATTACTAC	d__Bacteria	0.769116
CCACACCGCAGATGAAGAGGTTGAGCACCTTGTATTCAGAGAGGAAGAAGCTATCGTGCAATACGTTGAGCGACTTTCTCAAGTAATCGCTCTTCACTAC	d__Bacteria	0.771621
CCACCGAGTCGCGCTCGGCATTAAATCCCACCTTGAAAGGTTCGCATCCATCCACCTGTGCCATGAAATATCCCGTCATAGGTCGGCATATCATCTTGAG	d__Bacteria	0.861803
CCACGGGATCCTTGACCAGACTGGCATCCACCAGCGACTTCTTCACCTTTTCAGCCACCTGTTCGCGGGTCAATCCCAGGATATGAATTTTTCCGACAAC	d__Bacteria	0.791107
CCAGACCATAACGGACGGACAGGCAGTAAGGCTACGACTGCTGGAAGCCATGAGAATTGGTGAAAGAGAGATTCCGAGAAACTCTGTTGTTGTGGGGGCA	d__Bacteria	0.789601
CCAGACCATAACGGACGGACAGGCAGTAAGGTTGAGACTCCTGGAAGCCATGCGTGTCGGCAATAGGGAGATACCACGAAATTCTGTCATTGTCGGAGTG	d__Bacteria	0.755777
CCAGACCATAACGGACGGACAGGCAGTAAGGTTGAGACTGCTGGAAGCCATGAGAATTGGTGAAAGAGAGATTCCGAGAAACTCTGTTGTTGTGGGGGCA	d__Bacteria	0.77346
CCAGACCATAACGGACGGACAGGCAGTAAGGTTGAGACTGCTGGAAGCCATGCGTGTCGGCAATAGGGAGATACCACGAAATACTGTCATTGTCGGAGTG	d__Bacteria	0.859258
CCAGACCATAACGGACGGACAGGCAGTAAGGTTGAGACTGCTGGAAGCCATGCGTGTCGGCAATAGGGAGATACCACGAAATTCTGTCATTGTCGGAGTG	d__Bacteria	0.780811
CCAGACCATAACGGACGGACAGGCAGTAAGGTTGAGACTGCTGGAAGCCATGCGTGTCGGCAATAGGGAGATACCACGAAATTCTGTTATTGTCGGAGTG	d__Bacteria	0.782152
CCAGACCATAACGGACGGACAGGCAGTAAGGTTGAGATTGTTGGAATCTATGCGTGTCGGCAATAGGGAGATACCACGAAATTCTGTCATTGTCGGAATG	d__Bacteria	0.763555
CCAGACCATAACGGACGGACAGGCAGTAAGGTTGAGATTGTTGGAATCTATGCGTGTCGGCAATAGGGAGATACCACGAAATTCTGTCATTGTCGGAGTG	d__Bacteria	0.713034
CCAGACCATAACGGACGGACAGGCAGTACGGTTGAGACTGCTGGAAGCCATGCGTGTCGGCAATAGGGAGATACCACGAAATACTGTCATTGTCGGAGTG	d__Bacteria	0.845281
CCAGCAGGCAGCGTTCATGCAGCAGCTGTTTGCCATGCAGATGCAGGCACAGGAGTGCTGCTGCGAGAACCGCTCTGCCATTCAGGGCGTAAACTACAAT	d__Bacteria	0.897785
CCAGCCGTAAACGATGCTCGCTAGGTGTCAGGCATGGCGCGACCGTGTCTGGTGCCGCAGGGAAGCCGTGAAGCGAGCCACCTGGGAAGTACGGCCGCAA	d__Bacteria	0.77092
CCATCAAGAGTACCCGCCCCAATGTGGTTTATAAGGACGGCGCCTTCACCACCCTGGTATCAGGTACCATCCTGGGCGAACTGGGCTCTGCCGAAGATAT	d__Bacteria	0.807947
CCATCATCACGAAGTGGGTATAGAGCCTCATATATGGAACTCCGCACGCAATGCCTCAGTAATCGCCCGTAATATCTACTCCGCCCTGAGTGAACTGGAC	d__Bacteria	0.777674
CCATCGGCTGCACGCGTTCTCCGGCTTTCCTGGGCGTCCCCCGCGCGCGGGCGGCTTCGCCCGTTTGGTCTGCCCGGCTTTTGCTTCCCCACCGTTTGTC	d__Bacteria	0.771979
CCATCTGTATGGGCGTAACCTTTGTCGTCTGACCGAAGGCCGAGCTTGAAAGTTCAACTATTCCCATGTCGGATTCTTTCACATACAGTGAATCCGCCTC	d__Bacteria	0.908792
CCATGACGAGATCGGAATTAGAAACCCGTGTAGTCCATGACGAGATCGGAAGAGCACACGTCTGAACTCCGTCACCGAGAGTTATCTCGTATGCCGTCTT	d__Bacteria	0.940359
CCATGCGAATTCCAGCCGGAGGCGTATCCTGATGAAGATTGGGAACCGGGAACTGCGGCCCGGTGCAGACATAACTCCAGACAGGAATTCCCGCCTTTTG	d__Bacteria	0.839865
CCATTATGCGCAGATTCTGGAGGCTGTACAATCAGGAAAACTGCCGCAGGAGACTCTGGAAACTGCTATAAAAAGAATAGAAAGATTAAACGCAGATTAT	d__Bacteria	0.926385
CCCAAATTAACTTTATAACGGCGTAAAGAGTGGTCACATGCTATCCAAGTAGCTAAGATTAAAAAGCAGCTGAGCTGTCATAAGCCCAAGATGCCAATAA	d__Bacteria	0.88254
CCCACATGTCATCGGGCAGTTCCTCGTCCGAAATCTTCTCGCAGGCGGCTTGCAGGTAGGCCATCTCGTCCGCGGAGAATTCCACCTTCAAGGGATGTTC	d__Bacteria	0.918909
CCCATCATGGGGTTGAACTCGTGCAGGGAAGCGATGATGTTCTTGATCTGCTCAACGGTCTTGCCCTGAGCCTTTGCAAGAGCCTCAATGTCGGCTTCCT	d__Bacteria	0.707863
CCCATCATTGGGTTGAACTCGTGGAGTGAAGCAATGATAGCCTTGATTGCGTCAACGCTCTTGCCCTGAGCAGCAGCAAGCTTCTCAATGTCAGCTTCCT	d__Bacteria	0.747378
CCCATTGGAGTTTTAAATTGGTGTAAAGGATACGTAGCCGGCCGTAAAAATGGCTAGAGTCAAATAGAAGTAATTACAATACCTAGAGTAGGGCTGATAT	d__Bacteria	0.881891
CCCGAAACCAATCCGGTCGGTGTGTATCAGCGTGATATCGAAATTCCCGCCGATTGGGATGGACGCGACATATTCCTCCGTTTGGAAGGAGCAAAATCCG	d__Bacteria	0.820357
CCCTAAACCAGTACAAATTCCGGAAGCAATACCAATCAAAACTTCGGACATAATATTCTCCTAAAAAAATGCTATCTTTATTCCAGAATAAAGAAGAAAA	d__Bacteria	0.759404
CCCTCAGCATCCGAGCCGAAGACTCCCGGAGCTCGGGCGAAGACATCCTTCCCCCCGGGGCCGCGCACGTCCTCATCAACTCTCTAGCAAAACCATTAGA	d__Bacteria	0.871634
CCCTCAGCATCCGAGCCGAAGACTCCCGGAGCTCGGGCGAAGACATCCTTCCCCCCGGGGCCGCGCACGTCCTCATCAACTCTCTAGCAAAACTATTAGA	d__Bacteria	0.908716
CCCTCAGCATCCGAGCCGAAGACTCCCGGAGCTCGGGTGAAGACATCCTTCCCCCCGGGGCCGCGCACGTCCTCATCAACTATCTAGCAAAACTATTAGA	d__Bacteria	0.920429
CCCTCATCATCCGAGCCGAAGACTCCCGGAGCTCGGGCGAAGACATCCTTCCCCCCGGGGCCGCGCACGTCCTCATCAACTCTCTAGCAAAACTATTAGA	d__Bacteria	0.908439
CCCTCCAGTCACATTAGAAACCCCTGTAGTCCATGACGAGATCGGAAAGCACACGTCTGAACTCCAGTCACGTCTATGAATCTCGTATGCCGTCTTCTGC	d__Bacteria	0.774845
CCCTGCCAGCCGTCGTCGATGTTGATGTAGGACCATCCGTAGTCGGCCAGTCCGCTTACATTCACCATAGATACGTTCATTGACGACATCGCAAACTTGC	d__Bacteria	0.706612
CCCTGGATGTAAACGGTTATTCACACATGGGAACCTTCAAGGCACAAAAGGTGGCAAACGGAACCATCTATGGCATGAACGATAAGGGTACGGCATTCAA	d__Bacteria	0.770724
CCCTGGTATGCTACATCATGTACACCGTGAGCCCTGAAGTTATAGAGAATTTCCACACAGAATATCTCTATCTTACCAGTGTCTTCGTATTGGTAGGCTT	d__Bacteria	0.776485
CCCTTGGCAATCATCACCAGGCTAGCGCCGTGATCCTGGAACTCATCTACGTATGGGTCCATACGGTTGGCTGTGGTAGGACCCATAGAGCCACATGGAT	d__Bacteria	0.800017
CCCTTGGCAATCATTACAAGGCTAGCACCGTGATCCTGGAACTCATCTACGTATGGGTCCATACGGTTGGCTGTGGTAGGTCCCATAGATCCACATGGAT	d__Bacteria	0.863208
CCCTTGGCAATCATTACAAGGCTAGCGCCATGATCCTGGAACTCATCTACGTATGGGTCCATACGGTTGGCTGTGGTAGGTCCCATAGAGCCACATGGAT	d__Bacteria	0.879308
CCCTTGGCAATCATTACCAAGCTAGCGCCGTGATCCTGGAACTCATCTACGTATGGATCCATACGGTTGGCTGTGGTAGGTCCCATTGAACCACATGGAT	d__Bacteria	0.762445
CCCTTGGCAATCATTACCAAGCTAGCGCCGTGATCCTGGAACTCATCTACGTATGGGTCCATACGGTTGGCTGTGGTAGGTCCCATAGAGCCACATGGAT	d__Bacteria	0.800501
CCGACGGTAAACCATGGGAACTAGGTGTTGGAGGTATCGACCCCTCCAGTGCCGCAGCTAACGCATTAAGTTCCCCGCCTGGGGAGTACGCTCGCAAGAG	d__Bacteria	0.844071
CCGAGAAGGTACGCAAGCACATTGCGAATGCCTACCGACTGGTATTCCATGGTCAGACATCCCTCTTCGATGCCATCAACCAGATCAAGGATCAGGTGCC	d__Bacteria	0.715099
CCGAGAAGGTACGCAAGCACATTGCGAATGCCTACCGACTGGTATTCCATGGTCAGACATCCCTCTTCGATGCCATCAACCAGATCAAGGATCAGGTGCT	d__Bacteria	0.753382
CCGAGCATTGGGTTGTGTTCGCAAAGGCTTTCAACGCGTGCACGGATGTATTCAACCGTTACACCCATTGCCTTAGCCATCTCTTCTTGTCCCTTCAAAT	d__Bacteria	0.847052
CCGAGCATTGGGTTGTGTTCGCAAAGGCTTTCAACGCGTGCACGGATGTATTCAACCGTTACGCCCATTGCCTTAGCCATCTCTTCTTGTCCCTTCAAAT	d__Bacteria	0.849757
CCGATATGCCGCTGACGGTTCAGATCAACCAGCTTGCGCTGAACAAACTGCTTGAGATCTTTGCCTATGACAATGTGATGGGCGTGACGGGAAATACCAT	d__Bacteria	0.710949
CCGATGTTCAGCACGATTTCTTCCGGCTTCACGTCGATAACGGTACCTTCAACTACCTCTCCTGTGTGTATTGTCTTTAATGAATCTTCTAACATTTGTT	d__Bacteria	0.746448
CCGCATTGTCAAGCGTTGTAAATACTATCGTCTGGAGAAAGACAATTCCGATCAGCATAATCCCGACGTAAACAGGATATTGTATGTCCTTCTGTCCGGC	d__Bacteria	0.910903
CCGCCAGGAGCAGGTAGAGGCTCCGCTGAACGAGGTTCTCGCTGCAGGTATGATTCTGATGACCGGCTGGAAGGGCGAATGCGATTTCATCGACCCTATG	d__Bacteria	0.801161
CCGCCGCGGTAATACAGGAGACCCAAATTAACTTTATAACGGCGTAAAGAGTGGTCACATGCTATCCAAGCAGCTAAGATTAAAAAGCAGCTGAGCTGTC	d__Bacteria	0.858744
CCGGCATCTTCACCGGTACTACAATTTCGCCGGGATGGGTAATTGAGACAGCGTCCGGATCATTACACCATTCGTGCAGGTCGGAACTTACCCGACAAGG	d__Bacteria	0.757681
CCGTAGGACAATACACCGGATACTATTACACCGCAACGATGTCCGCGCAGGCAATCACCCCGTTTATCGCGGGCCTTATCATGGATAACAGCAAAAACGA	d__Bacteria	0.760947
CCGTATCATTGACGCGGTGTATGCCGAAGAAGCAGTAAAGTTTGAGCATGTCACAGTAAGGATGCAGAAAGCGAACGATGACGATGTACTACAACCGTGG	d__Bacteria	0.791482
CCGTGCCCGAAGAAGAAATAATTTTCACGCGCGGCGACGAAAACGTTTTTTCAAGCAGTTTTTCCCGCTCCGCCACGGTGAACGTCGGCTGTTTTTCGGG	d__Bacteria	0.881123
CCTCCAGCACCGCCGCCCCAGGCCCCGCAGCCGCCGCGTCGCCGCCATTTTTTAAAGGGTCCGCAGCCTGACTCTGCGGAGTAAGGGGGGGTGGAGCGGG	d__Bacteria	0.831148
CCTCTTCGCCTGTAAACAATAAGGATAAGTGGCTCTTCCGTGCCACCTATTATCTGCCCGAGCGCTACGTGGCTAAGGCTGCGCAGCAGTCGGCATTGAA	d__Bacteria	0.768125
CCTCTTTCAGGCCCGAAAGGCCATCCCGCAGCGAGCGGCCTTCTGAAGCCGAACCGCCTGAAGGAAGCGCGCGGAGATGGTAAAGGCCCAAAGCGACGAG	d__Bacteria	0.771869
CCTGTGACGACAAATCTGCTCAAATTTATGCGCGCTTCGATAAAAATGATTGGCGTATCCAACCTGCAGAGTTTTATCGCTTCCATGACGCAGAAGTTAA	d__Bacteria	0.784281
CCTGTTTGCTCCCCACGCTTTCGCACCTGAGCGTCAGTCTTCGTCCAGGGGGCCGCCTTCGCCACCGGTATTCCTCCAGATCTCTACGCATTTCACCGCT	d__Bacteria	0.733637
CCTTCACCCACTTAACCGGTGAGTAGCTCTTCAGGTCGGTAGACACTGAGCGTACGCCGATGTACGGCTCGTCAGCCTCGCCCTCGAGCACGATGTCTGT	d__Bacteria	0.855197
CCTTCTACCCACCAACCATCAAGTACAGAAAGGTTGACTACACCGTTCATCTCTGCCTTCTCGCCAGATGTACCAGAAGCCTCTAATGGACGTGTAGGAG	d__Bacteria	0.781889
CCTTCTACCCACCAACCATCAAGTACAGAGAGGTTGACAACACCATTCATCTCAGCCTTCTCGCCAGATGTACCAGAAGCCTCCAATGGACGTGTAGGAG	d__Bacteria	0.707388
CCTTCTACCCACCAACCATCAAGTACAGAGAGGTTGACAACACCATTCATCTCAGCCTTCTCGCCAGATGTACCAGATGCCTCCAATGGGCGTGTAGGAG	d__Bacteria	0.704992
CCTTCTTCGGATATGAAGAAAGCGTTTACGGTCCCGGCGTAATCCTTGCGAACCTTCTCAACACGTTCACCGACTTTTTAAGCACCTGCATCAACGAAGG	d__Bacteria	0.913366
CCTTGTCCCAAGCGGACATTATTATATTGTCATTCATCCCGGAAGACAGCCTCATCACCCTGAGCAGCTGAGGCATGAGCTCTTCCATAGAAGACGGCTC	d__Bacteria	0.799826
CGAAACCCTGCTCTCTAAACTGAAGTTCAAGCTGCAGGTGGATGAGCTGGATGCTGACCTGATCGAGGACGTAAACATCGAGATGACGCAGGCTAGAGAA	d__Bacteria	0.827112
CGAAATCGCCAAACTCGGGATTGAAGATGCGGCGGCAGTAGGTGGCCTGCAGGGTATGACCCGGCGTGAAACTGTAATAGGCACTCGCTGAGTAGATATG	d__Bacteria	0.835171
CGAAATCGCCAAACTCGGGATTGAAGATGCGGCGGCAGTAGGTGGCCTGCAGGGTATGACCCGGCGTGAAGCGGTAATAGGCGCTCGCCGAGTAGATATG	d__Bacteria	0.755406
CGAAATCGCCAAACTCGGGATTGAAGATGCGGCGGCAGTAGGTGGCCTGCAGGGTATGACCCGGCGTGAAGCTGTAATAAACGCTCGCCGAGTAGATATG	d__Bacteria	0.788573
CGAAATCGCCAAACTCGGGATTGAAGATGCGGCGGCAGTAGGTGGCCTGCAGGGTATGACCCGGCGTGAAGCTGTAATAGGCGCTCGCCGAATAGATATG	d__Bacteria	0.700939
CGAAATCGCCAAACTCGGGATTGAAGATGCGGCGGCAGTAGGTGGCCTGCAGGGTATGACCCGGCGTGAAGCTGTAATAGGCGCTCGCCGAGTAGATATG	d__Bacteria	0.731335
CGAAATCGCCAAACTCGGGATTGAAGATGCGGCGGCAGTAGGTGGCCTGCAGGGTATGCCCCGGCGTGAAGCGGTAATAAGCACTCGCCGAGTAGATATG	d__Bacteria	0.844493
CGAAATCGCCAAACTCGGGATTGAAGATGCGGCGGCAGTAGGTGGCCTGCAGGGTATGCCCCGGCGTGAAGCTGTAATAGGCGCTTGCCGAGTAGATATG	d__Bacteria	0.722229
CGAAATCGCCAAACTCGGGATTGAAGATGCGGCGGCAGTAGGTGGCCTGCAGGGTATGTCCCGGTGTGAAGGTGTAATAGGCACTTGCCGAGTAGATATG	d__Bacteria	0.873066
CGAAATCGCCAAACTCTGGATTGAAGATGCGGCGGCAGTAGGTGGCCTGCAGGGTATGACCCGGCGTGAAGCTGTAATAAACGCTCGCCGAGTAGATATG	d__Bacteria	0.789781
CGAAATTACCAATGAACTACCGATTAGTTAGCAGACTTTCCCCAAGACACTTAAAAGTTTCGCTCGAGCCTTTTCAAAGGCTCGCGGATTCCAAAGGCAG	d__Bacteria	0.799235
CGAATGTCTGACTATTGCCGAAATTGCTTATCAAGTGGCCGACATCATGAATCTCGAACGTTCGCTTATCCATCCCGCCACTACGGAAGAGATGCAAGAA	d__Bacteria	0.731686
CGAATTATTATAACATTGAAAATGGAAATATCACTGGTGATTATTCAACAATAAATACATGGGCTTCTACCAGTAAAGCGTTATTTAATGAGGGTGTTGA	d__Bacteria	0.803881
CGACAAATCTGCTCAAATTTATGCGCGCTTCGATAAAAATGATTGGCGTATCCAACCTGCAGAGTTTTATCGCTTCCATGACGCAGAAGTTAACACTTTC	d__Bacteria	0.753932
CGACTCATCAGAAATATCCGAAAGTGTTAACTTCTGCGTCATGGAAGCGATAAAACTCTGCAGGTTGGATACGCCAATCATTTTTATCGAAGCGCGCATA	d__Bacteria	0.788573
CGACTGCGTTCTTTCTGTCTTTCTCCGAAACAATGCAGACCTCCGTCTTGTCCTCATCGGAAATCGAGCTGTCGCTGTCCTTTTCAAGTCCGCAGATAAG	d__Bacteria	0.744599
CGACTGCGTTCTTTCTGTCTTTCTCCGAAACAATGCAGACCTCCGTCTTGTCCTCATCGGAAATCGGGCTGTCGCTGTCCTTTTCAAGTCCGCAGATAAG	d__Bacteria	0.735375
CGAGAAGTTTAACCCGGTTTGGACCATGTCGGGAAGCTGGAACATCCGACGCACCTTCTGGGGCGACCCGTTTGCCTATAAGGAGAACGACAAGGAAGAC	d__Bacteria	0.706291
CGAGATCGGAAGAGCGATTAGAAACCCCGGTAGTCCATGACGAGATCGGAAGAGCACACGTCTGAACTCAGTCACGACATAGTATCTCGTATGCCGTCTT	d__Bacteria	0.96493
CGAGATCGGAAGAGCGATTAGAAACCCCGGTAGTCCATGACGAGGAGAGCACACGTCTGAACTCCAGTCACGACATAGTATCTCGTATGCCGTCTTCTGC	d__Bacteria	0.918753
CGAGATCGGAAGAGCGATTAGAAACCCGTGTAGTCCATGACGAGATCGGAAAGCACACGTCTGAACTCCAGTCACGACATAGTATCTCGTATGCCGTCTT	d__Bacteria	0.944108
CGAGATCGGAAGAGCGATTAGAAACCCGTGTAGTCCATGACGAGATCGGAAGAGCACACGTCTGAACTCCATCACGACATAGTATCTCGTATGCCGTCTT	d__Bacteria	0.958114
CGAGATCGGAAGAGCGATTAGAAACCCGTGTAGTCCATGACGAGATCGGAAGAGCACACGTCTGAATCCAGTCACGACATAGTATCTCGTATGCCGTCTT	d__Bacteria	0.951692
CGAGATCGGAAGAGCGATTAGAAACCCTAGTAGTCCATGACGAGATCGGAAGAGCCACGTCTGAACTCCAGTCACAACATAGTATCTCGTATGCCGTCTT	d__Bacteria	0.945809
CGAGATCGGAAGAGCGATTAGAAACCCTGGTAGTCCATGACGAGAAGCACACGTCTGAACTCCAGTCACGACATAGTATCTCGTATGCCGTCTTCTGCTT	d__Bacteria	0.894695
CGAGATCGGAAGAGCGATTAGAAACCCTTGTAGTCCATGACGAGATCGGAAGAGCACACGTCGAACTCCAGTCACGACATAGTATCTCGTATGCCGTCTT	d__Bacteria	0.95067
CGAGATCGGAAGAGCGATTAGATACCCCGGTAGTCCATGACGAGATCGGAGAGCACACGTCTGAACTCCAGTCACGACATAGTATCTCGTATGCCGTCTT	d__Bacteria	0.923732
CGAGATCGGAAGAGCGATTAGATACCCGTGTAGTCCATGACGAGATCGGAAGAGCACACGTCTGAACTCCATCACGACATAGTATCTCGTATGCCGTCTT	d__Bacteria	0.951054
CGAGATCGGAAGAGCGATTAGATACCCTAGTAGTCCATGACGAGATCGGAAGAGCACGTCTGAACTCCAGTCACGACATAGTATCTCGTATGCCGTCTTC	d__Bacteria	0.94972
CGAGATCGGAAGAGCGATTAGATACCCTTGTAGTCCATGACGAGATCGGAAGAGCACACGTCTGAATCCAGTCACGACATAGTATCTCGTATGCCGTCTT	d__Bacteria	0.953833
CGAGTATTTCCTGTCTGCCCGAAAGCGCAACCTCTTGCGGCTCGGTAATAGTAAATGCGTTGATTTTCGTTTTGACGATTATACCGTTTACGCCTTTAAA	d__Bacteria	0.865546
CGATAAAAATGATTGGCGTATCCAACCTGCAGAGTTTTATCGCTTCCATGACGCAGAAGTTAACACTTTCGGATATTTCTGATGAGTCGAAAAATTATCT	d__Bacteria	0.710283
CGATCATCTGATATCCCCAGATCGGAACAATCCCCATAAACACGCCGAACATGACCGCCAACGCGATCCGGACATTCGACTCCGGGGAATGCGTAATATT	d__Bacteria	0.868438
CGATGCATTCCTATATAAGACGATCTGGAGAACAGAAGTCGTCTCTCATCCGGCGATATCTCGCGAAGCGCCTCGCCTGCTGCCCTTGTCATGTTATATC	d__Bacteria	0.705768
CGATTACCACGACTGTCATGGCAATCCAAACTTTGCTTATCTTCAGCTTTTTCATATTATAGTGGGATTACTTTTTTACCTTTTTACTTTTTTACCTTTT	d__Bacteria	0.704986
CGCAACCTGTGACGACAAATCTGCTCAAATTTATGCGCGCTTCGATAAAAATGATTGGCGTATCCAACCTGCAGAGTTTTATCGCTTCCATGACGCAGAA	d__Bacteria	0.702996
CGCAATGGCTAGTCAATTGAATATCCGTGAAAGCCCCACTGCTCTTGGCTAAAATGAATGGGTCATTTTTTTTGTCAACAGTGGCTTCGCCTCGATCATT	d__Bacteria	0.903452
CGCCAAAGACGGAAATGGAAAGGACGAAGGCGGAAACGGAAACCGGAAAAAGAAAAAGAAGAATAATAACAACCGCCCGCAACAAGCTGCCAATGGCGAA	d__Bacteria	0.895889
CGCCGCGGTAATACAGGAGACCCAAATTAACTTTATAACGGCGTAAAGAGTGGTCACATGCTATCCAAGTAGCTAAGATTAAAAAGCAGCTGAGCTGTCA	d__Bacteria	0.908658
CGCCTCACAACATCGAGGCACTCTCTTTCTTTCTCCAGATCATAATCGGAGCTGAACAGAATCAGACTGTAACCGTCCTTTCTTGCCTCTTCTCCGATGT	d__Bacteria	0.722233
CGCGATTAACCCAAGTCAATAGAAGCCGGCGTAAAGAGTGTTTTAGATCACCCCCTCCCCAATAAAGCTAAAACTCACCTGAGTTGTAAAAAACTCCAGT	d__Bacteria	0.773357
CGCGCCTTAAACGATGAATACTAGACGTTGGGATTAAACTCAGTGTCGCAGCTAACGCATTAAGTATTCCACCTGGGGAGTACGATCGCAAGGTTGAAAC	d__Bacteria	0.880531
CGCGCTCTACTGCCCGACGGGCTATCTGGAGCTGCTCAGATTACAGGATCGCTTCGCCTATCTGCCCGAAATGCCGTACCGAGCGGTCGATCTCGATAAG	d__Bacteria	0.882289
CGCGCTGTAAACGATGAGTGCTAGACGGTGGAGGTATTGACCCCTTCGCTGCCGAAGCTAACGCGTTAAGCACTCCGCCTGGGGAGTACGGTCGCAAGAC	d__Bacteria	0.911877
CGCGCTTATAGTCAGAACCCTTCAAGATACCTTCCTGACCAGTGTAGCCTACGCTGACACGATATGGCATAGACCAAGACTGCTTGCTGATGCCACCTGT	d__Bacteria	0.873409
CGCGGTAATACAGGAGACCCAAATTAACTTTATAACGGCGTAAAGAGTGGTCACATGCTATCCAAGTAGCTAAGATTAAAAAGCAGCTGAGCTGTCATAA	d__Bacteria	0.913268
CGCTTCGATAAAAATGATTGGCGTATCCAACCTGCAGAGTTTTATCGCTTCCATGACGCAGAAGTTAACACTTTCGGATATTTCTGATGAGTCGAAAAAT	d__Bacteria	0.807464
CGCTTCTTGAATTCGTAATACTCCGGGTCCGTCCGCATCTTCGACAGCTGCTTGGACAGCCCGCCCACATTCCGGTCGATGGACATTCCGTTATCGTTCA	d__Bacteria	0.871981
CGGAAATGCTGCATTAAGATCATTTGAGTTATCATAATCTATGTTATTGCATATACAGGTAGTGATCAAAACTCTTGGAATGTAAAAAAGGAGCCTACAA	d__Bacteria	0.853675
CGGAATCCGGCATAGGGAAAGACCCCTAGTGGCGAATAGTCGGTCGTGGCCTTGTCGAGTCCGTTCCATGCGAACAGTCCGTTCTTGTCCGCCGGGACAC	d__Bacteria	0.750345
CGGACGAATGCGGGTGTCGTGACCGATGCCGGGTAGTCCAGCCTATTGGCGGCATCCTCCGCAATGTGTGAGGCGGCATTGATATCCTTAACGAGATAAT	d__Bacteria	0.88146
CGGAGAGAGCGAGCGTTATTCGTAGTGATTGGGCGTAAAGGGTACGTAGACGGTCAAGGAAAGTTCATAATTAAAATCCATGGTAGCACCGTGGTAGTTT	d__Bacteria	0.985977
CGGAGGGGGCTAGTGTTATTCGTGTTGACTGGGCGTAAAGGGTACGTAGGTGGCGAAGTGAGCTTTAAGCCAAAAACTGGCGTTGCGTCTTTTCGGCTTA	d__Bacteria	0.997113
CGGAGGTGGAGCTGTGCCCCGTGTCGAAGCAGTCGCACTCGCTCTCCTTGCGCTTGGGAAAACCGCTCATGCCGTGATACTTGCGCAGGGTGGCAAAGCC	d__Bacteria	0.882195
CGGCGAATCTTACGCTTGTAGTTCCTTGCCATCAACGCATCTGCCTGAACCGGATTCTGACTGACATACGAAAAGGCACAAAGCTGCTTCATGAACATGT	d__Bacteria	0.863093
CGGCGCAACCTGTGACGACAAATCTGCTCAAATTTATGCGCGCTTCGATAAAAATGATTGGCGTATCCAACCTGCAGAGTTTTATCGCTTCCATGACGCA	d__Bacteria	0.715211
CGGCGCCTACCGGAGATCCGGAATATTTCTTTACCACACACTGTCTGGACAGTTCGGCGGTAAACAACGGACATTACCACAGTGATAAACTGGAGCAGTT	d__Bacteria	0.810643
CGGCTACCGCTGCTAAGCCCGTAGAGCAAGTTACCGTTGAACCCGTCAAAGCGAAAGAGGATAGAAAGATACCCTTAACGCCGATGAGCGCGCCGCAAAA	d__Bacteria	0.857374
CGGGAAATCCTTATGGCTGAGAGGGGCGAAGGGAAACAACCTGAAGAATGTGGATGTGGAATTTCCTTTGGGAAAACTCATTTGCGTCACAGGGGTGTCC	d__Bacteria	0.842407
CGGGGGGGGCAAGCGTTATCCATCATTACTGGGCGTTAAGAGTCCGTAGACGGTGTAATAAGTTTTTTGTGAAATTTTAAGTGATAATCTTAACAAAGTG	d__Bacteria	0.98911
CGGGGGGGGCGAGCGTTATTCGAAATGATTGGGCGTAAAAGGCACGTAGACGGTTTTTTGAGTTGACATGCTTGAGGTCGTACAAAGAATACAAAATAAA	d__Bacteria	0.976048
CGGGGGGGGCGAGCGTTATTCGAAATGATTGGGCGTAAAGAGCACGTAGACGGTTTTTTAAGTAGACATAGTATATAATATTCTATATTGTATACTTATA	d__Bacteria	0.990319
CGGTAAGCAAAATATGACGAAGCATAGGCACATAATCACCTGTGACACCTGCCCATGCTATCATTTCATCTACAAACTTACGAATTTCTTCCATAAACTA	d__Bacteria	0.772079
CGGTAATACAGGAGACCCAAATTAACTTTATAACGGCGTAAAGAGTGGTCACATGCTATCCAAGCAGCTAAGATTAAAAAGCAGCTGAGCTGTCATAAGC	d__Bacteria	0.891317
CGGTAATACAGGAGACCCAAATTAACTTTATAACGGCGTAAAGAGTGGTCACATGCTATCCAAGTAGCTAAGATTAAAAAGCAGCTGAGCTGTCATAAGC	d__Bacteria	0.919698
CGGTTACAAGCTGTGCACGGTACGTAAAGAAGTAATGCAGATAAGCATGATTTTCAAGCACTATATAGCGCAGATACGGCACTGCACCAATCATCAGGAT	d__Bacteria	0.87467
CGTAATTCATTATTACTAGGTGTATAGCGTCTGTAGGCGGCGGACCCCGCGTAGGCGGGCAGCTAGAGTGTTTAATAGGAAAGGGGAACTAATTTAAGAG	d__Bacteria	0.871817
CGTATGTATGATGGGTTCCATGTTCGCAGGATGCGAGGAGAGCCCGGGAGAATACGAACTGTTCCAGGGCAGAAAATACAAGGTATACCGTGGCATGGGT	d__Bacteria	0.889509
CGTCAACAGGATTCTGGTGGTTAGAGTGCATCTGGAACAGACGGCTCACGCGCTCCTTCTTGCCAGAGCGAACGTTGAAGGTGTAAGAACCAGACTCAAT	d__Bacteria	0.752909
CGTTAAACAGGAAGATGACCAGACAGGCCACTTCCGTTGATGGCAATGATGATAGCGCCGGATGCATCCTGCACGCTCACCTGGTTGTAGATATTGCCAC	d__Bacteria	0.792425
CTACAAATCTGCTCAAATTTATGCGCGCTTCGATAAAAATGATTGGCGTATCCAACCTGCAGAGTTTTATCGCTTCCATGACGCAGAAGTTAACACTTTC	d__Bacteria	0.792139
CTACCACACATGCCCCTGTCTCATCCTCTGTCAGAGTCAGCTGTAATGGCTGGTCTGCTCCTCCATAAAAATATCCATTGAGCCGCAGATATCTGAATGG	d__Bacteria	0.830476
CTACCCGTAAACTATGAGTACTAGGTGTTGGAGGTATTGACCCCTTCAGTGCCGTAGCTAACGCATTAAGTACTCCGCCTGGGAACTACGGCCGCAAGGC	d__Bacteria	0.884764
CTACCTGACCGTTTACAGCAACCTGAGTCAGGTATACGTAAAGGCCGGCGACAAGGTCAGCACCCGCCAGGCCATCGGTAAGATATTTACCGATACGGAA	d__Bacteria	0.828897
CTACGGAATGGTACTCCAGGAGACCTGGCTTAAGAGCGGCACGATAAGGGACAATATAGCATACGGAAGATCGGACGCAACGGATGAGGAGATCATCGAA	d__Bacteria	0.746634
CTACTACCCCTACTTCTGCCCCTGCTGTGACCGCCCCCGCTCCTGTCGTGAAGGACGGGGTGCCAGCTGCCTTGCAGAGAAAAACGGCAGACTATACACC	d__Bacteria	0.720542
CTACTACTTTAAGACAGGAAGAAGTAGAGATTCAGCCAGCAGTCAATCACATGATTACACTGAATTTATTTACTACAATCACCAATGCCAACTTTAGCAA	d__Bacteria	0.901847
CTAGCAGATCCACGGTCTCCCCCGTTGCCGCCCCCAACTACATGCACATCTACTGACGCAACACGATCCGTAAACATAAATGTTTGTGTAGATGTAACGG	d__Bacteria	0.780486
CTAGCCCTAAACTATGATCGCTTGGTGTGACAGGTACCCAATCCTGTCGTGCCGGAGCTAACGCGTTAAGCGATCCGCCTGGGGAGTACGGTCGCAAGGC	d__Bacteria	0.865924
CTAGCCGTAAACGATACTCGCTAGGTGTCGGCCACGGTGCGACCGTGGTCGGTGCCGTAGGGAAGCCGTGAAGCGAGCCACCTGGGAAGTACGGCCGCAA	d__Bacteria	0.918287
CTAGCCGTAAACGATACTCGCTAGGTGTCGGCCACGGTGCGACCGTTGTCGGTGCCGTAGGGAAGCCGTGAAGCGAGCCACCTGGGAAGTACGGCCGCAA	d__Bacteria	0.933972
CTAGCCGTAAACGATGGACACTAGGTGTCGGGGGTGTCGACTCCCCCGGTGCCGAAGCTAACGCATTAAGTGTCCCGCCTGGGGAGTACGGCCGCAAGGC	d__Bacteria	0.846464
CTAGCCGTAAACGATGGACACTAGGTGTCGGGGGTGTCGACTCCCTCGGTGCCGAAGCTAACGCATTAAGTGTCCCGCCTGGGGAGTACGGCCGCAAGGC	d__Bacteria	0.839928
CTAGCCGTAAACGATGGGCACTAGGTGTAGGAGGTATTGACCCCTTCTGTGCCGAAGCTAACGCATTAAGTGCCCCGCCTGGGGAGTACGGCCGCAAGGT	d__Bacteria	0.947084
CTAGCCGTAAACGGTGGGCACTAGGTGTAGGAGGCATCGACCCCTCCTGTGCCGCAGCTAACGCATTAAGTGCCCCGCCTGGGGAGTACGACCGCAAGGT	d__Bacteria	0.954772
CTAGCCGTAAACGGTGTGCACTTGATGTGGGAGGAATTATCCCCCTCCGTGTCGAAGCTAACGCGATAAGTGCACCGCCTGGGGAGTACGGTCGCAAGAT	d__Bacteria	0.893542
CTAGCCGTAAACGTTGGGTGCTAGGTGTGGGCGGATATCGACCCCGTCCGTGCCGAAGCTAACGCATTAAGCACCCCGCCTGGGGAGTACGGCCGCAAGG	d__Bacteria	0.845785
CTAGCCTTAAACGATGATGACTTGGTGTGTCGGGTTTTCAGTCCCGATGTGCCGGAGCTAACGCGTTAAGTCATCCGCCTGGGGAGTACGGTCGCAAGAC	d__Bacteria	0.743994
CTATCCGAAGCAGTTTGTCGACTTCTTTGGAGTGGGGCGCACCCAGCTTCAGCAAACCTTTGACCGTATGGCAAAGATTGTGCCTGCCGACCATATATTT	d__Bacteria	0.795792
CTATGTCATACTCCCCTTTCTCTCGGAAGTTACCTTCTCCATGAATGATTTTACTCAGGCTGCCATTGCTTACAAACTGGGCATATCGCTTGATACCAAA	d__Bacteria	0.838763
CTCAAATTTATGCGCGCTTCGATAAAAATGATTGGCGTATCCAACCTGCAGAGTTTTATCGCTTCCATGACGCAGAAGTTAACACTTTCGGATATTTCTG	d__Bacteria	0.826315
CTCACCTCAAGCTCCCAAACCTGGTAGGATCATTAACACTTTCGGTTTCCTATTCAAATAGCTGCGATCAAACCCCACATTTTCCATAGTCCTTCTGCCA	d__Bacteria	0.77439
CTCATGTTTTTCTCTGTCAGGATCAGCGGATATTCCAAAATCTGTTCCAGGGTGATCTGAGTCTGTCCGGCTAAGGGGTGACCGGCACCGGTGACAAAAT	d__Bacteria	0.829632
CTCCGCCGGCGGACCTGGTGAACCAGGCGTTCGCATGGGGACACAAGGCTATTGCCATTACTGACCACGGCAATGTTCAGGCATACCCCGAAGCGATGAA	d__Bacteria	0.865097
CTCTGCCGCTTTGGCATCCTCCGTATAATAATCGGTAAGCCCCACTATATTGCCATAATCATTTCCGCAGGCTTTTATACTTGAATTTATATCCGTATCA	d__Bacteria	0.706068
CTGCCGTTGTAGGAGTCATTGCCATTGACCGGAATGGAATACTGTACTCCGTTCGTGCCGTACCACTGGGCGTTGACGATAGGTGTCTTCACGATGCCGC	d__Bacteria	0.741221
CTGCGTTGAGATCCACATCTTTCCAGAGGGAATCTGTGACCTCAGCATCGCTCTGCGCGAAACTTTCTAGCGAGCAGACGAGCAGAGTACTCATCAAAAT	d__Bacteria	0.796196
CTGCTCAAATTTATGCGCGCTTCGATAAAAATGATTGGCGTATCCAACCTGCAGAGTTTTATCGCTTCCATGACGCAGAAGTTAACACTTTCGGATATTT	d__Bacteria	0.794857
CTGTCGCTGTGTCTTTTCGCTGTAGGAGATAATAGCTTGAGGGCTGAGCTGCTGCAACGTAGTTTAACTTTTGTGGCACGTCGTTGACACTGCCAGCAAT	d__Bacteria	0.78962
CTGTGACGACAAATCTGCTCAAATTTATGCGCGCTTCGATAAAAATGATTGGCGTATCCAACCTGCAGAGTTTTATCGCTTCCATGACGCAGAAGTTAAC	d__Bacteria	0.784235
CTGTGATACGGAGGTGGATCAAATGGTGCTGGAATTCCCGGTGCAAATATTTCCTCCCGGGCGATGGGTTTACGGATACGCATATCCGCAGTCTGCGCCA	d__Bacteria	0.946333
CTTCGATAAAAATGATTGGCGTATCCAACCTGCAGAGTTTTATCGCTTCCATGACGCAGAAGTTAACACTTTCGGATATTTCTGATGAGTCGAAAAATTA	d__Bacteria	0.718022
CTTCGGTGAGGAGAAGCTCTGCAAGCTGTTCAATCGTGACACACAACTTCGCAACCAAGCTTACATCGATGCTTGTATGACCCCTACAGAAACTTTGGGT	d__Bacteria	0.760068
CTTGCCGTAAACGATGTATACTTGATGTAGTTAGGCTCAACCCTGACTGTGTCGAAGCTAACGCGATAAGTATACCGCCTGAGGAGTACGCTCGCAAGGG	d__Bacteria	0.838423
CTTGGCAGGCAGCGTTATCGGTTCCTTGTTACGACCGTCGTACGAGAGCTGCCATTCGGTGGTCTTCGGATTGAACACCACGTCGAGGGCAAACTTCGAG	d__Bacteria	0.810959
CTTTCGATTTTCGGATCGTACCAACGGATAAGGATTTCGCTACCGTCCATATTTTTCGTTTTGAGATTATATTTCGGTTGATAGAAAAGGTGGAATTCGC	d__Bacteria	0.767958
GAAAGAGTATTAGAAACCCTAGTAGTCCATGACGAGATCGGAAAGCACACGTCTGAACTCCAGTCACGTCTATGAATCTCGTATGCCGTCTTCTGCTTGA	d__Bacteria	0.83264
GAAAGAGTATTAGAAACCCTAGTAGTCCATGACGAGATCGGAAGACACACGTCTGAACTCCAGTCACCGAGAGTTATCTCGTATGCCGTCTTCTGCTTGA	d__Bacteria	0.784004
GAAAGAGTATTAGAAACCCTGGTAGTCCATGACGAGATCGGAAGCACACGTCTGAACTCCAGTCACCGAGAGTTATCTCGTATGCCGTCTTCTGCTTGAA	d__Bacteria	0.783692
GAAAGAGTATTAGAAACCCTGGTAGTCCATGACGAGGAAGAGCACACGTCTGAACTCCAGTCACCGAGAGTTATCTCGTATGCCGTCTTCTGCTTGAAAA	d__Bacteria	0.775662
GAAAGAGTATTAGATACCCCAGTAGTCCATGACAAGATCGGAGAGCACACGTCTGAACTCCAGTCACACTACGACATCTCGTATGCCGTCTTCTGCTTGA	d__Bacteria	0.827969
GAAAGAGTATTAGATACCCCGGTAGTCCATGACGAGATCGGAAGAGCACACGTCTGACTCCAGTCACGTCTATGAATCTCGTATGCCGTCTTCTGCTTGA	d__Bacteria	0.858404
GAAAGAGTATTAGATACCCCGGTAGTCCATGACGAGATGGAAGAGCACACGTCTGAACTCCAGTCACCGAGAGTTATCTCGTATGCCGTCTTCTGCTTGA	d__Bacteria	0.742259
GAAAGAGTATTAGATACCCGAGTAGTCCATGACGAGATCGGAAGACACACGTCTGAACTCCAGTCACCGAGAGTTATCTCGTATGCCGTCTTCTGCTTGA	d__Bacteria	0.770155
GAAAGAGTATTAGATACCCGTGTAGTCCATGACGAGATCGGAGAGCACACGTCTGAACTCCAGTCACACTACGACATCTCGTATGCCGTCTTCTGCTTGA	d__Bacteria	0.86709
GAAAGAGTATTAGATACCCTAGTAGTCCATGACGAGATCGGAGAGCACACGTCTGAACTCCAGTCACCGAGAGTTATCTCGTATGCCGTCTTCTGCTTGA	d__Bacteria	0.724143
GAAAGAGTATTAGATACCCTGGTAGTCCATGACGAGATCGGAAGAGCACACGTCTGACTCCAGTCACCGAGAGTTATCTCGTATGCCGTCTTCTGCTTGA	d__Bacteria	0.775802
GAAAGAGTATTAGATACCCTTGTAGTCCATGACGAGATCGGAAAGCACACGTCTGAACTCCAGTCACACTACGACATCTCGTATGCCGTCTTCTGCTTGA	d__Bacteria	0.87727
GAAAGAGTATTAGATACCCTTGTAGTCCATGACGAGATCGGAAGAGCACACGTCTGAACCCAGTCACACTACGACATCTCGTATGCCGTCTTCTGCTTGA	d__Bacteria	0.930647
GAAAGAGTGATTAGAAACCCGAGTAGTCCATGACGAGATCGGAAAGCACACGTCTGAACTCCAGTCACGACATAGTATCTCGTATGCCGTCTTCTGCTTG	d__Bacteria	0.708128
GAAAGAGTGATTAGAAACCCGGGTAGTCCATGACGAGATCGGAAGAGCACACGTCTGACTCCAGTCACCGAGAGTTATCTCGTATGCCGTCTTCTGCTTG	d__Bacteria	0.730827
GAAAGAGTGATTAGAAACCCGTGTAGTCCATGACGAGATCGGAAGGCACACGTCTGAACTCCAGTCACACTCACTGATCTCGTATGCCGTCTTCTGCTTG	d__Bacteria	0.724023
GAAAGAGTGATTAGAAACCCGTGTAGTCCATGAGAGATCGGAAGAGCACACGTCGAACTCCAGTCACGACATAGTATCTCGTATGCCGTCTTCTGCTTGA	d__Bacteria	0.72985
GAAAGAGTGATTAGAAACCCTGGTAGTCCATGACGAGATCGGAAAGCACACGTCTGAACTCCAGTCACGACATAGTATCTCGTATGCCGTCTTCTGCTTG	d__Bacteria	0.701744
GAAAGAGTGATTAGAAACCCTGGTAGTCCATGACGAGATCGGAAGAGATACGTCTGAACTCCAGTACGACATAGTATCTCGTATGCCGTCTTCTGCTTGA	d__Bacteria	0.724063
GAAAGAGTGATTAGAAACCCTTGTAGTCCATGACGAGATCGGAAGAGCACACGTCTGACTCCAGTCACGACATAGTATCTCGTATGCCGTCTTCTGCTTG	d__Bacteria	0.745326
GAAAGAGTGATTAGATACCCCAGTAGTCCATGACGAGATCGGAAGAGCACACGCACGTCTGAACTCCAGTCACGACATAGTATCTCGTATGCCGTCTTCT	d__Bacteria	0.725672
GAAAGAGTGATTAGATACCCGGGTAGTCCATGACGAAATCGGAAGACACACGTCTGAACTCCAGTCACACTCACTGATCTCGTATGCCGTCTTCTGCTTG	d__Bacteria	0.717283
GAAAGAGTGATTAGATACCCTGGTAGTCCATGACGAGATCGGAAGAGCACACGTCTGACTCCAGTCACGACATAGTATCTCGTATGCCGTCTTCTGCTTG	d__Bacteria	0.746183
GAAAGAGTGATTAGATACCCTGGTAGTCCATGACGAGATCGGAGAGCACACGTCTGAACTCCAGTCACGTCTATGAATCTCGTATGCCGTCTTCTGCTTG	d__Bacteria	0.702098
GAAAGAGTGATTAGATACCCTTGTAGTCCATGACGAGATCGGAAGAGCACCACGTCTGAACTCCAGTCACGACATAGTATCTCGTATGCCGTCTTCTGCT	d__Bacteria	0.793795
GAAAGAGTGGGAAAGAGTATTAGAAACCCCAGTAGTCCATGACGAGATCGGAAGGCACACGTCTGAACTCCAGTCACGTCTATGAATCTCGTATGCCGTC	d__Bacteria	0.858029
GAAAGAGTGGGAAAGAGTATTAGAAACCCGAGTAGTCCATGACGAGATCCGGAAGAGCACACGTCTGAACTCCAGTCACGTCTATGAATCTCGTATGCCG	d__Bacteria	0.905872
GAAAGAGTGGGAAAGAGTATTAGAAACCCGGGTAGTCCATGACGAGATCGGAGCACACGTCTGAACTCCAGTCACGTCTATGAATCTCGTATGCCGTCTT	d__Bacteria	0.859714
GAAAGAGTGGGAAAGAGTATTAGATACCCTAGTAGTCCATGACGAGATCGGAAAGCACACGTCTGAACTCCAGTCACGTCTATGAATCTCGTATGCCGTC	d__Bacteria	0.836472
GAAAGAGTGGGAAAGAGTATTAGATACCCTAGTAGTCCATGACGAGATCGGAAGAGCACACGTCGAACTCCAGTCACGTCTATGAATCTCGTATGCCGTC	d__Bacteria	0.878224
GAAAGAGTGGGAAAGAGTATTAGATACCCTGGTAGTCCATGACGAGATCGGAAGAGCACACGTCTGACTCCAGTCACGTCTATGAATCTCGTATGCCGTC	d__Bacteria	0.884128
GAAAGATGATTAGAAACCCCGGTAGTCCATGACGAGATCGGAGAGCACACGTCTGAACTCCAGTCACCGAGAGTTATCTCGTATGCCGTCTTCTGCTTGA	d__Bacteria	0.72131
GAAAGATGATTAGAAACCCCGGTAGTCCATGACGAGATCGGAGAGCACACGTCTGAACTCCAGTCACGTCTGCTAATCTCGTATGCCGTCTTCTGCTTGA	d__Bacteria	0.756698
GAAAGATGATTAGAAACCCGTGTAGTCCATGACGAGATGGAAGAGCACACGTCTGAACCCAGTCACCGAGAGTTATCTCGTATGCCGTCTTCTGCTTGAA	d__Bacteria	0.75265
GAAAGATGATTAGAAACCCTTGTAGTCCATGACGAGATCGGAAGAGCACACGTCTGAACCCAGTCACCGAGAGTTATCTCGTATGCCGTCTTCTGCTTGA	d__Bacteria	0.792377
GAAAGATGATTAGATACCCCAGTAGTCCATGACGAATCGGAAGAGCACACGTCTGAACTCCAGTCACCGAGAGTTATCTCGTATGCCGTCTTCTGCTTGA	d__Bacteria	0.709723
GAAAGGGCGACCCATTGGAGTTTTAAATTGGTGTAAAGGATACGTAGCCGGCCGTAAAAATGGCTAGAGTCAAATAGAAGTAATTACAATACCTAGAGTA	d__Bacteria	0.868782
GAAAGGGCGACCCATTGGAGTTTTAAATTGGTGTAAAGGGTACGTAGCTGGCCGTAAAAATGGCTAGAGTCAAATAGAAGTAATTACAATACCTAGAGTA	d__Bacteria	0.834656
GAACCCAGCGAGCAAAGGCTTTGATTTCACGGATTAAACAGGGAAGAATTGGCAGAGAAGAGATTGAGAAAACAGAACAAGATATTTTTGGAAAAGGAAG	d__Bacteria	0.911594
GAAGAGTGATTAGATACCCCAGTAGTCCATGACGAGATCGGAAGAGCACACGTCTGACTCCAGTCACGTCTATGAATCTCGTATGCCGTCTTCTGCTTGA	d__Bacteria	0.713037
GAAGAGTGATTAGATACCCCGGTATTAGAAACCCTAGTAGTCCATGACGAGATCGGAAGAGCACACGTCTGAATCCAGTCACGTCTATGAATCTCGTATG	d__Bacteria	0.82385
GAAGAGTGATTAGATACCCTGGTATTAGAAACCCCAGTAGTCCATGACGAGATCCGGAAGAGCACACGTCTGAACTCCAGTCACGTCTATGAATCTCGTA	d__Bacteria	0.769909
GAAGAGTGATTAGATACCCTGGTATTAGAAACCCCAGTAGTCCATGACGAGATCGGAGAGCACACGTCTGAACTCCAGTCACGTCTATGAATCTCGTATG	d__Bacteria	0.711171
GAAGAGTGATTAGATACCCTGGTATTAGAAACCCCGGTAATCCATGACGAGATCGGAAGAGCACACGTCTGAACCCAGTCACGTCTATGAATCTCGTATG	d__Bacteria	0.837553
GAAGAGTGATTAGATACCCTGGTATTAGAAACCCCGGTAGTCCATGACGAGATCGGAAGACACACGTCTGAACTCCAGTCACATCTATGAATCTCGTATG	d__Bacteria	0.772917
GAAGAGTGATTAGATACCCTGGTATTAGAAACCCCGGTAGTCCATGACGAGATCGGAAGACACACGTCTGAACTCCAGTCACGTCTATGAATCTCGTATG	d__Bacteria	0.805425
GAAGAGTGATTAGATACCCTGGTATTAGAAACCCCGGTAGTCCATGACGAGATCGGAAGAGCACACGTCTGACTCCAGTCACGTCTATGAATCTCGTATG	d__Bacteria	0.835431
GAAGAGTGATTAGATACCCTGGTATTAGAAACCCCGGTAGTCCATGACGAGATCGGAGAGCACACGTCTGAACTCCAGTCACGTCTATGAATCTCGTATG	d__Bacteria	0.777196
GAAGAGTGATTAGATACCCTGGTATTAGAAACCCCGGTAGTCCATGACGAGGTCGGAAGAGACACGTCTGAACTCCAGTCACGTCTATGAATCTCGTATG	d__Bacteria	0.723875
GAAGAGTGATTAGATACCCTGGTATTAGAAACCCCTGTAGTCCATGACGAGATCGGAAGAGCACACGTCTGACTCCAGTCACGTCTATGAATCTCGTATG	d__Bacteria	0.755219
GAAGAGTGATTAGATACCCTGGTATTAGAAACCCGAGTAGTCCATGACGAGATCGGAAAGCACACGTCTGAACTCCAGTCACGTCTATGAATCTCGTATG	d__Bacteria	0.768074
GAAGAGTGATTAGATACCCTGGTATTAGAAACCCGAGTAGTCCATGACGAGATCGGAAGAGCACACGTCTGAATCCAGTCACGTCTATGAATCTCGTATG	d__Bacteria	0.813491
GAAGAGTGATTAGATACCCTGGTATTAGAAACCCGGGTAGTCCATGACGAGAATCGGAAGAGCACACGTCTGAACTCCAGTCACGTCTATGAATCTCGTA	d__Bacteria	0.780494
GAAGAGTGATTAGATACCCTGGTATTAGAAACCCTAGTAGTCCATGACGAATCGGAAGAGCACACGTCTGAACTCCAGTCACGTCTATGAATCTCGTATG	d__Bacteria	0.841497
GAAGAGTGATTAGATACCCTGGTATTAGAAACCCTAGTAGTCCATGACGAGATCGGAAAGCACACGTCTGAACTCCAGTCACGTCTATGAATCTCGTATG	d__Bacteria	0.762337
GAAGAGTGATTAGATACCCTGGTATTAGAAACCCTAGTAGTCCATGACGAGATCGGAAGGCACACGTCTGAACTCCAGTCACGTCTATGAATCTCGTATG	d__Bacteria	0.81015
GAAGAGTGATTAGATACCCTGGTATTAGAAACCCTAGTAGTCCATGACGAGATCGGAGAGCACACGTCTGAACTCCAGTCACGTCTATGAATCTCGTATG	d__Bacteria	0.765466
GAAGAGTGATTAGATACCCTGGTATTAGAAACCCTAGTAGTCCATGACGAGATGGAAGAGCACACGTCTGAACTCCAGTCACGTCTATGAATCTCGTATG	d__Bacteria	0.77121
GAAGAGTGATTAGATACCCTGGTATTAGAAACCCTGGTAGTCCATGACGAGATCGGAAAGCACACGTCTGAACTCCAGTCACGTCTATGAATCTCGTATG	d__Bacteria	0.809425
GAAGAGTGATTAGATACCCTGGTATTAGATACCCCAGTAGTCCATGACGAGGGAAGAGCACACGTCTGAACTCCAGTCACGTCTATGAATCTCGTATGCC	d__Bacteria	0.739115
GAAGAGTGATTAGATACCCTGGTATTAGATACCCCGGTAGTCCATGACGAGATCGGAAGGCACACGTCTGAACTCCAGTCACGTCTATGAATCTCGTATG	d__Bacteria	0.806422
GAAGAGTGATTAGATACCCTGGTATTAGATACCCGAGTAGTCCATGACGAGATCGGAAAGCACACGTCTGAACTCCAGTCACGTCTATGAATCTCGTATG	d__Bacteria	0.750428
GAAGAGTGATTAGATACCCTGGTATTAGATACCCGTGTAGTCCATGACGAGATCGGAGAGCACACGTCTGAACTCCAGTCACGTCTATGAATCTCGTATG	d__Bacteria	0.74295
GAAGAGTGATTAGATACCCTGGTATTAGATACCCTAGTAGTCCATGACAGATCGGGAAGAGCACACGTCTGAACTCCAGTCACGTCTATGAATCTCGTAT	d__Bacteria	0.767223
GAAGAGTGATTAGATACCCTGGTATTAGATACCCTAGTAGTCCATGACGAGGAAGAGCACACGTCTGAACTCCAGTCACGTCTATGAATCTCGTATGCCG	d__Bacteria	0.737398
GAAGAGTGATTAGATACCCTGGTATTAGATACCCTTGTAGTCCATGACGAGATCGGAAAGCACACGTCTGAACTCCAGTCACGTCTATGAATCTCGTATG	d__Bacteria	0.769272
GAAGAGTGATTAGATACCCTGGTATTAGATCCCCGGTAGTCCATGACGAGATCGGAAAGCACACGTCTGAACTCCAGTCACGTCTATGAATCTCGTATGC	d__Bacteria	0.786179
GAAGAGTGGTTAGATACCCTGGTATTAGAAACCCCTGTAGTCCATGACGAGATCGGAGAGCACACGTCTGAACTCCAGTCACGTCTATGAATCTCGTATG	d__Bacteria	0.799102
GAAGGATCGGTCGAAGTAATTCCGCCGGCTTCCATGATTACCGATACGAGATTGAATTTACCGTCCTTAACGATAGTCTTGCCATAGGTTTCGTAACCCG	d__Bacteria	0.700493
GAAGGCACCGGGAATCAAGGGAGCCCGCAATTATGAGACTGCATTCCTCCCGGCTCAGCTGGACTGGCTCGAAAAGGACCTGAGTTATGTACCGGACTCG	d__Bacteria	0.941555
GAAGGGAAAGAACAAGAAAAAGACAAGAACAAAGAGTGTAACCATCAGAAACGGAGACACCCTTTCAGAAATAGCAGCACGCAATGGAACTACCGTTAAA	d__Bacteria	0.730446
GAAGGTATTAGATACCCTAGTAGTCCATGACGAATCGGAAGAGCACACGTCTGAACTCCAGTCACACTACGACATCTCGTATGCCGTCTTCTGCTTGAAA	d__Bacteria	0.919142
GAAGGTGCGGCAAAAGCGTCAGTGCGACGTCCTTAAAAGCAAGCGTCGGGCCGTGGAACAGTTCCAGTATATAAGTGGATTCGTCGATTTTTTTGACGGG	d__Bacteria	0.819281
GAAGGTGGCTGTGGTTAGCAATAAGTTCTATGCCGCGACGCAGGAGTTGTGCCGCCACTTCTTTGGCTCTCTTGTGCCGGTGGCTATTGGCGAGCGCGAG	d__Bacteria	0.844878
GAATGGTCTTGAGTTTCATAGTAATGGCTTTTTTGCAGTCCAACCCACAACATATATGCCGTTAACGAATATAAAAACCGAGGGGATAGAGTAGAGTGCA	d__Bacteria	0.746147
GAATTAGAAACCCTTGTAGTCCATGACGAGATCGGAAGAGCACACGTCTGAATCCAGTCACCGAGCGACATCTCGTATGCCGTCTTCTGCTTGAAAAAAA	d__Bacteria	0.761876
GAATTAGAAGCCCCAGTAGTCCATGACGAGATCGGAAGAGCACCACGTCTGAACTCCAGTCACCGAGCGACATCTCGTATGCCGTCTTCTGCTTGAAAAA	d__Bacteria	0.805575
GAATTGTATTTATTGTTACATGAACTTTTGCGTAGAATTTATGCGCATAATTAACAACTTCTTTAATATCATCGAGCGAATTTGGCACAGCTTTTCTTGC	d__Bacteria	0.904587
GACAAAAAGGGCGACCCATCGGAGTTTTAAATCGGTGTAAAGGATACGTAGCCGGCCTGTTGACTTTTTTAACACTGAAAAAGAGGGCTAGAGTCAAATA	d__Bacteria	0.853161
GACAAATCTGCTCAAATTTATGCGCGCTTCGATAAAAATGATTGGCGTATCCAACCTGCAGAGTTTTATCGCTTCCATGACGCAGAAGTTAACACTTTCG	d__Bacteria	0.796821
GACAAATGATACGCAGAAAGAACAGACAGAAGATACTTCCGGCACAACAATGGCAACAGTTCCGGATCTTGTAGGAAAGACTGAGGAAGAGGCTAAGACT	d__Bacteria	0.863319
GACAAGGGCGACGAGTGTTATTCATCTTTAACAGGTATATAGGGTACCTAGACGGTGTACAAAGGCTTAAATAAGTACCTGTTACACTTGAGTTTGATAT	d__Bacteria	0.88362
GACAATCGTAATCGGCAAATAACGATGAAGAAGTTTATTGAGACAATAAAGAACATCTTCAAGATCGAGGAACTCCGTACGAGACTCGGCTACACGTTCC	d__Bacteria	0.832621
GACAGAAAGGCGACCCATTGGAGTTTTAAATTGGTGTAAAGGATACGTAGCCGGCCGTAAAAATGGCTAGAGTCAAATAGAAGTAATTACAATACCTAGA	d__Bacteria	0.831137
GACAGAAAGGGCAACCCATCGGAGTTATAAATTGGTGTAAAGGGTACGTAGCCGGTGATATTTATCACTAGAGTCTAATGGAAGTACAAACAATACCTAG	d__Bacteria	0.881835
GACAGAAAGGGCGACCCATCGGAGTTATAAATTGGTGTAAAGGGTACGTAGCCTGTGATAAAATCACTAGAGTCCAATAGAAGTAGAAACAATACCTAGA	d__Bacteria	0.809061
GACAGAAAGGGCGACCCATCGGAGTTTTAAATCGGTGTAAAGGATACGTAGCCGGCTATAATATTTTTATAGCTAGAGTCAAATAGAAGAATTAACAATA	d__Bacteria	0.876084
GACAGAAAGGGCGACCCATTGGAATTATAAATTGGTGTAAAGGATACGTAGCCGGCCGTAAAAATGGCTAGAGTCAAATAGAAGTGATTACAATACCTAG	d__Bacteria	0.958237
GACAGAAAGGGCGACCCATTGGAATTATAAATTGGTGTAAAGGATACGTAGCCGGCCGTAAAATGGCTAGAGTCAAATAGAAGTGATTACAATACCTAGA	d__Bacteria	0.961973
GACAGAAAGGGCGACCCATTGGAGTTATGAATCGGTGTAAAGGATACGTAGCCGGCTATAGATATAGCTAGAGTCAAATAGAAGTGAGAACAATACCTAG	d__Bacteria	0.935714
GACAGAAAGGGCGACCCATTGGAGTTTTAAATTGGTGTAAAGGATACGCAGCCGGCCGTAAAAATGGCTAGAGTCAAATAGAAGTAATTACAATACCTAG	d__Bacteria	0.781966
GACAGAAAGGGCGACCCATTGGAGTTTTAAATTGGTGTAAAGGATACGTAGCCGGCCATAAAAATGGCTAGAGTCAAATAGAAGTAATTACAATACCTAG	d__Bacteria	0.848311
GACAGAAAGGGCGACCCATTGGAGTTTTAAATTGGTGTAAAGGATACGTAGCCGGCCGTAAAAATGGCCAGAGTCAAATAGAAGTAATTACAATGCCTAG	d__Bacteria	0.798677
GACAGAAAGGGCGACCCATTGGAGTTTTAAATTGGTGTAAAGGATACGTAGCCGGCCGTAAAAATGGCTAGAGTCAAACAGAAGTAATTACAATACCTAG	d__Bacteria	0.855888
GACAGAAAGGGCGACCCATTGGAGTTTTAAATTGGTGTAAAGGATACGTAGCCGGCCGTAAAAATGGCTAGAGTCAAATAGAAGTAATTACAATACCTAG	d__Bacteria	0.831631
GACAGAAAGGGCGACCCATTGGAGTTTTAAATTGGTGTAAAGGATACGTAGCCGGCCGTAAAAATGGCTAGAGTCAAATAGAGGTAATTACAATACCTAG	d__Bacteria	0.853243
GACAGAAAGGGCGACCCATTGGAGTTTTAAATTGGTGTAAAGGATACGTAGCCGGCCGTAAAAGTGGCTAGAGTCAAATAGAAGTAATTACAATACCTAG	d__Bacteria	0.858632
GACAGAAAGGGCGACCCATTGGAGTTTTAAATTGGTGTAAAGGATACGTAGCCGGCCGTAAAATGGCTAGAGTCAAATAGAAGTAATTACAATACCTAGA	d__Bacteria	0.851007
GACAGAAAGGGCGACCCATTGGAGTTTTAAATTGGTGTAAAGGATATGTAGCCGGCCGTAAAAATGGCTAGAGTCAAATAGAAGTAATTACAATACCTAG	d__Bacteria	0.776134
GACAGAAAGGGCGACCCATTGGAGTTTTAAATTGGTGTAGAGGATACGTAGCCGGCCGTAAAAATGGCTAGAGTCAAATAGAAGTAATTACAATACCTAG	d__Bacteria	0.876768
GACAGAAAGGGCGACCCATTGGAGTTTTAGATTGGTGTAAAGGATACGTAGCCGGCCGTAAAAATGGCTAGAGTCAAATAGAAGTAATTACAATACCTAG	d__Bacteria	0.833963
GACAGAAGGGCGACCCATTGGAGTTTTAAATTGGTGTAAAGGATACGTAGCCGGCCGTAAAAATGGCTAGAGTCAAATAGAAGTAATTACAATACCTAGA	d__Bacteria	0.824348
GACAGACAGTGCAGGCGTTATTCGGATTGACTGGGCGTAAAGGGTACGTAGGTTGTCTAAATAACTATATTCTGAAAAGCTAGAGGATAACTGTAGACAG	d__Bacteria	0.981709
GACAGACAGTGCGAGCGTTATTCGGCTTAAATGGGTGTAAAGGGTATGTAGGTGGTTTTTAAAAATAAGTCAAAAATACTAGAGTAATAACTTTAGAAGT	d__Bacteria	0.950107
GACAGAGGAGCCAAGCGTTGTCCGGATTTACTGGGCGTAAAGCGTCCACAGGTGGCACGTTAAGTGGGGTGTGAAAGCGGGTGGCTTAACCGCCCGAGGC	d__Bacteria	0.999966
GACAGAGGAGGCAAGCGTTGTCCGGACTTACTGGGCGTAAAGGGTCCGCAGGTGGTTGTGCAAGCAGGGTGTGAAAGCCGCCGGCTCAACTGGCGGTCGC	d__Bacteria	0.999846
GACAGAGGGGGCAAGCGTTGTCCGGATTTACTGGGCGTAAAGCGTCCGCAGGTGGTTGGTCAAGTAGCAACTGAAAGCGCGGGGCTTAACTCCGCGTCGC	d__Bacteria	0.999916
GACAGCATTTTATAGATATTAAGCACGATGAAAGTGTAACAGACATTACCTATGAAAATTCGCAGGCGAGAGAGCGTACTAAAATTCTGATGAACCTTTC	d__Bacteria	0.743637
GACAGCATTTTATAGATATTAAGCACGATGAAAGTGTAACAGACATTACCTATGAAAATTCGCAGGCGAGAGAGCGTACTAAAATTCTGATGAATCTTTC	d__Bacteria	0.759595
GACAGGAGGGGCGAGCGTTGAGCGTTTGTACTGGGCCTAAAGCGCGGGTATGTGGGTATGAAAACCAACTTCGTTCTAGAATCTTCGTAGACGCTAGAAT	d__Bacteria	0.840212
GACAGGGGGGCAAGCGTTATTCGGAATGATTTGGCGTAAAGGGCGCGTAGGCGGACAGCTCCTCCTTTAACAGTTAGCAATAAATTCCAAAGCCCAACTT	d__Bacteria	0.999397
GACAGGGGGGGCAAGCGTTATTCGGAATGATTTGGCGTAAAGGGCACGTAGGCGGACAAGCCTGCCTTTAACAGTTAGCGGGAAATCCCAAAGCCCAACT	d__Bacteria	0.997476
GACAGGGGGGGCAAGCGTTATTCGGAATGATTTGGCGTAAAGGGCGCGTAGGCGGACAGCTCCTCCTTTAACAGTTAGCAATAAATTCCAAAGCCCAACT	d__Bacteria	0.999361
GACAGGGGGGGCAAGCGTTATTCGGAATGATTTGGCGTAAAGGGCGCGTAGGCGGACAGCTCCTCCTTTAACAGTTAGCAATACATTCCAAAGCCCAACT	d__Bacteria	0.999167
GACAGGGGGGGCAAGCGTTATTCGGAATGATTTGGCGTAAAGGGCGCGTAGGCGGACAGCTCCTCCTTTAACAGTTAGCAATAGATTCCAAAGCCCAACT	d__Bacteria	0.999156
GACAGGGGGGGCAAGCGTTATTCGGAATGATTTGGCGTAAAGGGCGCGTAGGCGGACAGCTCCTCCTTTAGCAGTTAGCAATAAATTCCAAAGCCCAACT	d__Bacteria	0.99961
GACATAGGGGGCAAGCGTTGTTCGGAATTACTGGGCGTAAAGGGAGCGTAGGCGGAAGATTAAGTTAAGTGTGAAAGCCTTGGGCTTAACCCAAGAAATG	d__Bacteria	0.999995
GACATAGGGGGCAAGCGTTGTTCGGAATTACTGGGCGTAAAGGGAGCGTAGGCGGGAAATTAAGTTAAGTGTGAAAGCCTTGGGCTCAACCCAAGAAATG	d__Bacteria	0.999995
GACATAGGGGGCAAGCGTTGTTCGGAATTACTGGGCGTAAAGGGAGCGTAGGCGGGAAATTAAGTTAAGTGTGAAAGCCTTGGGCTTAACCCAAGAAATG	d__Bacteria	0.999993
GACATAGGGGGCAAGCGTTGTTCGGAATTACTGGGCGTAAAGGGAGCGTAGGCGGGAAATTAGGTTAAGTGTGAAAGCCTTGGGCTTAACCCAAGAAATG	d__Bacteria	0.999983
GACATAGGGGGCAAGCGTTGTTCGGAATTACTGGGCGTAAAGGGAGCGTAGGTGGGAGATTAAGTTAAGTGTGAAAGCCTTGGGCTCAACCCAAGAAATG	d__Bacteria	0.999995
GACATAGGTGGCGAACGTTATCCGGATTTATTGGGCGTAAAGGATGCGTAGATGTTATTATAAGTTATTAGTAGAAAATAGAAGCTCAACTTCTGGCAGC	d__Bacteria	0.999448
GACATTAGATACCCTTGTAGTCCATGACGAGATCGGAGAGCACACGTCTGAACTCCAGTCACGACAAAGTATCTCGTATGCCGTCTTCTGCTTGAAAAAA	d__Bacteria	0.707404
GACCCAAATTAACCTCCTAACGGTGTAAAGAGTGGTCACATGTTATCCAAGTAGCTAAGATTAAAAAGCAACTGAGCTGTCACAAGGCCAAGATGCCAAG	d__Bacteria	0.760767
GACCCAAATTAACTTTATAACGGCGTAAAGAGTGGTCACATGCTATCCAAGTAGCTAAGATTAAAAAGCAGCCGAGCTGTCATAAGCCCAAGATGCCAAT	d__Bacteria	0.910556
GACCCAAATTAACTTTATAACGGCGTAAAGAGTGGTCACATGCTATCCAAGTAGCTAAGATTAAAAAGCAGCTGAGCTGTCATAAGCCCAAGATGCCAAT	d__Bacteria	0.922249
GACCCAAATTAACTTTATAACGGCGTAAAGAGTGGTCACATGCTATCCAAGTAGCTAAGATTAAAAAGCAGCTGAGCTGTCCTAAGCCCAAGATGCCAAT	d__Bacteria	0.926034
GACCCAAATTAACTTTATAGCGGCGTAAAGAGTGGTCACATGCTATCCAAGTAGCTAAGATTAAAAAGCAGCTGAGCTGTCATAAGCCCAAGATGCCAAT	d__Bacteria	0.900233
GACGAACGCTGGCGGCATGCCTAATACATGCAAGTCGAACGATGATATCACTGCTTGCAGTGATTGATTAGTGGCGAACGGGTGAGTAACACGTGAGGAA	d__Bacteria	0.85143
GACGAACGCTGGCGGCGTGCTTAACACATGCAAGTCGAACGGAAAGGCCCTGCTTTTGTGGGGTGCTCGAGTGGCGAACGGGTGAGTAACACGTGAGTAA	d__Bacteria	0.887859
GACGAAGGGAGCGAGCGTTATCCATCATGACTGGGCGTAAAGGGTTCGTAGGTGGTTTTGTGATGTTACATATGAAAGCCCAAACTTAACTTTGGAAGGA	d__Bacteria	0.996416
GACGAAGGGAGCGAGCGTTATCCATCATGACTGGGCGTAAAGGGTTCGTAGGTGGTTTTGTGATGTTGCATATGAAAGCCCAAACTTAACTTTGGAAGGA	d__Bacteria	0.997053
GACGAAGGGCGCGGGTGTTATTCGTTTTGATTGGGTGTAAAGGGTAGGTAGGCGGTTTCTTGCTTTCTTTGGACAAAAGCGCGGAGAAGTTCCTACGCGA	d__Bacteria	0.932615
GACGAAGGGCGCGGGTGTTATTCGTTTTGATTGGGTGTAAAGGGTAGGTAGGCGGTTTCTTGCTTTCTTTGGACAAAATCGCGGAGTATTCCTACGCGAA	d__Bacteria	0.936183
GACGAAGGGTGCGGGTGTTATTCGTTTTGATTGGGTGTAAAGGGTACGTAGGTGGTTTCAGTATATACCCCCAGTTTAGCTAAAAGAGCAGAGTGTTCCT	d__Bacteria	0.912611
GACGAAGGGTGCGGGTGTTATTCGTTTTGATTGGGTGTAAAGGGTACGTAGGTGGTTTCAGTATATACCCCCAGTTTAGCTAAACGAGCAGAGTGTTCCT	d__Bacteria	0.910736
GACGACAAATCTGCTCAAATTTATGCGCGCTTCGATAAAAATGATTGGCGTATCCAACCTGCAGAGTTTTATCGCTTCCATGACGCAGAAGTTAACACTT	d__Bacteria	0.798594
GACGAGGGATGCTAGTGTTATCCGGAATTACTGGGCGTAAAGAGTATGTAGGTTGTATAATATGTTTTTAATAACTTTTTAAATTATTAAAAATACTATT	d__Bacteria	0.997685
GACGAGGGATGCTAGTGTTATCCGGAATTACTGGGCGTAAAGAGTATGTAGGTTGTATAATATGTTTTTAATAATTTTTTAAATTATTAAAAATACTATT	d__Bacteria	0.997031
GACGAGGGATGCTAGTGTTATCCGGAATTACTGGGCGTAAAGCGTATGTAGATTGTACAATGTGTTTTTAAAAAAACAATTTTCTAAAAAGACTATTAGT	d__Bacteria	0.997059
GACGAGGGATGCTAGTGTTATCCGGAATTACTGGGCGTAAAGCGTATGTAGATTGTACAATGTGTTTTTAAAAAGTATTTTTCTAAAAAGACTATTAGTA	d__Bacteria	0.996622
GACGAGGGATGCTAGTGTTATCCGGAATTACTGGGCGTAAAGGGTATGTAGGTTGTATAATATGTTTTTAATAATTTTTTAAATTATTAAAAATACTATT	d__Bacteria	0.996346
GACGAGTAGTGCGAGTGTTATTCCTCATGACTGGGCGTAAAGGGTGCGTAGGCGGTGTAATAAGTTTGAAGTTAAATGGATATAGGTAGTGAAGAACTTT	d__Bacteria	0.99901
GACGGAAAGACCCCATGGAGCTTTACTGTAACTTGATATTGGGTCTTGGTATTCTATGTACAGGATAGGCGGGAGACTATGAAACATACACGCCAGTGTA	d__Bacteria	0.726214
GACGGAGGGGGCAAGCGTTGTCCGGATTTATTGGGCGTAAAGGGCGCGTAGGCGGCCCCACACGTCGCTGGTGAAAGCGCACGGCTTAACCGGGCGATGT	d__Bacteria	0.999982
GACGGAGGGTGCAAGCGTTGTCCGGAATTATTGGGCGTAAAGCGTCCGTAGGCGGCTTATTAAGTCTGGTGTTAAAGACCGGGGCTCAACCTCGGAAAAG	d__Bacteria	0.999992
GACGGAGGGTGCAAGCGTTGTCCGGAATTATTGGGCGTAAAGCGTTCGTAGGCGGCTTATTAAGTCTGGTGTTAAAGACCGAGGCTCAACCTCGGAACAG	d__Bacteria	0.999999
GACGGAGGGTGCAAGCGTTGTCCGGAATTATTGGGCGTAAAGCGTTCGTAGGCGGCTTATTAAGTCTGGTGTTAAAGACCGGGGCTCAACCCCGGAAAAG	d__Bacteria	0.999999
GACGGAGGGTGCAAGCGTTGTCCGGAATTATTGGGCGTAAAGCGTTCGTAGGCGGCTTATTAAGTCTGGTGTTAAAGACTGGGGCTCAACCCCAGAACAG	d__Bacteria	0.999998
GACGGGGGGGGCAGGCGTTACCCATCATGACTGGGCGTAAAGGGTCCGTAGACATTAAAGTAAGTTACTTGTGAAATTATTAAGTAATACTTAAAATATA	d__Bacteria	0.96718
GACGGGGGGGGCATGCGTTACCCATCATGACTGGGCGTAAAGGGTCCGTAGACATTAAAGTAAGTTACTTGTGAAATTGTTAAGTAATACTTAAAATATA	d__Bacteria	0.964671
GACGTAGGAGGCGAGCGTTGTCCGGAGTTACTGGGCGTAAAGGGCGCGCAGGCGGCCCGGTGCGCCGGGGGTGAAAGGCGGTGGCTCAACCACCGGACGG	d__Bacteria	0.999973
GACGTAGGGGGCGAGCGTTGTCCGGATTCACTGGGCGTAAAGGGCGCGTAGGCGGCCCGTTAAGTGTGGGGTGAAAGCTCCGGGCTCAACCCGGAAACCG	d__Bacteria	0.999998
GACGTGGAAGACGAGTGTTATTCATCTTTAATAGGTTTAAAGGGTACGTAGACGGCAAATTTAGTATAAACTTGGGGGGGGGGGGGGGGAGCATACCTCC	d__Bacteria	0.765125
GACGTGGGGGGCGAGCGTTGTCCGGAATCACTGGGCGTAAAGCGCGCGTAGGCGGCGGCTAAGGCGGGGTGTGAAAATCCGGGGCCCAACCCCGGGAAAG	d__Bacteria	0.999985
GACGTGGGGGGCGAGCGTTGTCCGGAATCACTGGGCTTAAAGCGTCCGAAGGCGGCCAGTGGAGTGGGGGCAGAAAGCCCGGGGAGCGCCCGGGGAGGCT	d__Bacteria	0.993244
GACTCGAGATGGTGACGATTGGCTTTGTGGAGAAGGGAGATATGCAATGCGACATCAACGGTGTCAGCGTGAAGGCTGTGGCAGGCGACTTGGTGATATG	d__Bacteria	0.712239
GAGAAAGAGTGATTAGATACCCTAGTAGTCCATGACGAGATCGGAAAGCACACGTCTGAACTCCAGTCACGTCTATGAATCTCGTATGCCGTCTTCTGCT	d__Bacteria	0.715476
GAGAATCCATGATGACAGGGGAAAGCTGTACCTGGCGTGATGATTCCTTCGGTGAGGTATGTGAGCGCCTGAGTAGTCTTAAAGGTTGAACCCGGTGGAT	d__Bacteria	0.775934
GAGAATCCATGATGACAGGGGAAAGCTGTACCTGGCGTGATGATTCCTTCGGTGAGGTATGTGAGCGCCTGAGTAGTCTTGAAGGTTGAACCCGGTGGAT	d__Bacteria	0.758586
GAGACCCAAATTAACTTTATAACGGCGTAAAGAGTGGCCACATGCTATCCAAGTAGCTAAGATTAAAAAGCAGCTGAGCTGTCATAAGCCCAAGATGCCA	d__Bacteria	0.922724
GAGACCCAAATTAACTTTATAACGGCGTAAAGAGTGGTCACATGCTATCCAAGTAGCTAAGATTAAAAAGCAGCTAAGCTGTCATAAGCCCAAGATGCCA	d__Bacteria	0.903949
GAGACCCAAATTAACTTTATAACGGCGTAAAGAGTGGTCACATGCTATCCAAGTAGCTAAGATTAAAAAGCAGCTGAGCTGTCATAAGCCCAAGATGCCA	d__Bacteria	0.917337
GAGACCCAAATTAACTTTATAACGGCGTAAAGAGTGGTCACATGCTATCCGAGTAGCTAAGATTAAAAAGCAGCTGAGCTGTCATAAGCCCAAGATGCCA	d__Bacteria	0.916646
GAGACCCAAATTAACTTTATAGCGGCGTAAAGAGTGGTCACATGCTATCCAAGTAGCTAAGATTAAAAGGCAGCTGAGCTGTCATAAGCCCAAGATGCCA	d__Bacteria	0.956936
GAGACGTAAAGAGACTTGGCAGAGGTATCGGCTCGGGTACGGGCAAAACCTCAGGCAAAGGTCATAAAGGTCAATGGGCAAGAAGCGGCGGCGGCGTACG	d__Bacteria	0.815934
GAGACTCAAAACCCACGTATGAGAATACTAAGGTAGCCTTAGGAGAAACCTCGATGGTATACTTACCATCCATGTCTGTAACGGCACCTGCCTTGGAAGA	d__Bacteria	0.793519
GAGACTCAAAACCCACGTATGAGAATACTAAGGTAGCCTTAGGAGAAACCTCGATGGTATAGTTACCATCCATGTCTGTAACGGCACCTGCCCTGGAAGA	d__Bacteria	0.793654
GAGACTCAAAACCCACGTATGAGAATACTAAGGTAGCCTTAGGAGAAACCTCGATGGTATAGTTACCATCCATGTCTGTAACGGCACCTGCCTTGGAAGA	d__Bacteria	0.754637
GAGAGATTAGAAACCCCGGTAGTCCATGACGAGATCGGAAGACACACGTCTGAACTCCAGTCACGACATAGTATCTCGTATGCCGTCTTCTGCTTGAAAA	d__Bacteria	0.808296
GAGATTAGAAACCCGAGTAGTCCATGACGAGATCGGAAGAGCACACGTCTGAATCCAGTCACCGAGAGTTATCTCGTATGCCGTCTTCTGCTTGAAAAAA	d__Bacteria	0.713635
GAGATTAGAAACCCTAGTAGTCCATGACGAGATCGGAAGAGCACACGTCTGACTCCAGTCACCGAGAGTTATCTCGTATGCCGTCTTCTGCTTGAAAAAA	d__Bacteria	0.710274
GAGATTAGAAACCCTAGTAGTCCATGACGAGATCGGAAGAGCACACGTCTGACTCCAGTCACGACATAGTATCTCGTATGCCGTCTTCTGCTTGAAAAAA	d__Bacteria	0.757498
GAGCAATTAGAAACCCTAGTAGTCCATGACGAGATCCGGAAGAGCACACGTCTGAACTCCAGTCACGACATAGTATCTCGTATGCCGTCTTCTGCTTGAA	d__Bacteria	0.795676
GAGCACACATTAGAAACCCCGGTAGTCCATGACGAGATCGGAAGAGCACACGTCTGACTCCAGTCACGACATAGTATCTCGTATGCCGTCTTCTGCTTGA	d__Bacteria	0.814647
GAGCACACATTAGAAACCCGTGTAGTCCATGACGAGATCGGAGAGCACACGTCTGAACTCCAGTCACGACATAGTATCTCGTATGCCGTCTTCTGCTTGA	d__Bacteria	0.754406
GAGCACACATTAGAAACCCTAGTAGTCCATGACGAGATCGGAAGAGCACACGTCTGACTCCAGTCACGACATAGTATCTCGTATGCCGTCTTCTGCTTGA	d__Bacteria	0.801238
GAGCACACATTAGATACCCGAGTAGTCCATGACGGAGATCGGAAGCACACGTCTGAACTCCAGTCACGACATAGTATCTCGTATGCCGTCTTCTGCTTGA	d__Bacteria	0.771659
GAGCACACATTAGATACCCGTGTAGTCCATGACGAGATCGGAAGAGCACACGTCCTGAACTCCAGTCACGACATAGTATCTCGTATGCCGTCTTCTGCTT	d__Bacteria	0.807443
GAGCACACATTAGATACCCGTGTAGTCCATGACGAGATCGGAGAGCACACGTCTGAACTCCAGTCACGACATAGTATCTCGTATGCCGTCTTCTGCTTGA	d__Bacteria	0.728695
GAGCACACATTAGATACCCTAGTAGTCCATGACGAGATCGGAAGACACACGTCTGAACTCCAGTCACGACATAGTATCTCGTATGCCGTCTTCTGCTTGA	d__Bacteria	0.759654
GAGCACACATTAGATACCCTAGTAGTCCATGACGAGATCGGAGAGCACACGTCTGAACTCCAGTCACGACATAGTATCTCGTATGCCGTCTTCTGCTTGA	d__Bacteria	0.717671
GAGCACACATTAGATACCCTAGTAGTCCATGACGAGATGGAAGAGCACACGTCTGAACTCCAGTCACGACATAGTATCTCGTATGCCGTCTTCTGCTTGA	d__Bacteria	0.734222
GAGCACACATTAGATACCCTAGTAGTCCATGACGAGTCGGAAGAGCACACGTCTGAACTCCAGTCACGACATAGTATCTCGTATGCCGTCTTCTGCTTGA	d__Bacteria	0.725945
GAGCACACATTAGATACCCTGGTAGTCCATGACGAGAGGAAGAGCACACGTCTGAACTCCAGTCACGACATAGTATCTCGTATGCCGTCTTCTGCTTGAA	d__Bacteria	0.756538
GAGCACACATTAGATACCCTTGTAGTCCATGACGAGATCGGAAGAGCACACGTCTGAACCCAGTCACGACATAGTATCTCGTATGCCGTCTTCTGCTTGA	d__Bacteria	0.842811
GAGCACACGTCTGAACTCCAGTCACATTAGATACCCGTGTAGTCCATGACGAGATCGGAAAGCACACGTCTGAACTCCAGTCACCGAGAGTTATCTCGTA	d__Bacteria	0.730192
GAGCACACGTCTGAACTCCAGTCACCGAGAGTTATCTCGTATGCCGTCTTCTGCTTGAAAAAAAAAAAAAGTCAAAACTTGAGGCTCAACCTCAAATCGC	d__Bacteria	0.778272
GAGCACACGTCTGAACTCCAGTCACCGAGAGTTATCTCGTATGCCGTCTTCTGCTTGAAAAAAAAAAAATGTGAAAGCCCTCGGCTTAACCGAGGAGGGT	d__Bacteria	0.881477
GAGCACACGTCTGAACTCCAGTCACCGAGAGTTATCTCGTATGCCGTCTTCTGCTTGAAAAAAAAAAAATGTGAAATACCCGGGCTCAACTTGGGTGCTG	d__Bacteria	0.902897
GAGCACACGTCTGAACTCCAGTCACCGAGAGTTATCTCGTATGCCGTCTTCTGCTTGAAAAAAAAAAAGCGTCAAAACTTGAGGCTCAACCTCAAATCGC	d__Bacteria	0.774076
GAGCACACGTCTGAACTCCAGTCACCGAGAGTTATCTCGTATGCCGTCTTCTGCTTGAAAAAAAAAAATTGTGAAATCTAATGGCTTAACCATTAAACTG	d__Bacteria	0.706551
GAGCACACGTCTGAACTCCAGTCACCGAGAGTTATCTCGTATGCCGTCTTCTGCTTGAAAAAAAAAAGACGTCAAAACTTGAGGCTCAACCTCAAATCGC	d__Bacteria	0.782478
GAGCACACGTCTGAACTCCAGTCACCGAGAGTTATCTCGTATGCCGTCTTCTGCTTGAAAAAAAACAGGCGTCAAAACTTGAGGCTCAACCTCAAATCGC	d__Bacteria	0.852116
GAGCACACGTCTGAACTCCAGTCACCGAGAGTTATCTCGTATGCCGTCTTCTGCTTGAAAAAAAACATGCATCAAAACTTGAGTCTCAACCTCAAATCGC	d__Bacteria	0.702516
GAGCACACGTCTGAACTCCAGTCACCGAGAGTTATCTCGTATGCCGTCTTCTGCTTGAAAAAAAACTAGCGTCAAAACTTGAGGCTCAACCTCAAATCGC	d__Bacteria	0.787868
GAGCACACGTCTGAACTCCAGTCACCGAGAGTTATCTCGTATGCCGTCTTCTGCTTGAAAAAAAACTGGCGTCAAAACTTGAGGCTCAACCTCAAATCGC	d__Bacteria	0.802011
GAGCACACGTCTGAACTCCAGTCACCGAGAGTTATCTCGTATGCCGTCTTCTGCTTGAAAAAAGACTGGCGTCAAAACTTGAGGCTCAACCTCAAATCGC	d__Bacteria	0.812102
GAGCACACGTCTGAACTCCAGTCACCGAGAGTTATCTCGTATGCCGTCTTCTGTTTGTAATAAAACTGGCGTCAAAACTTGAGGCTCAACCTCAAATCGC	d__Bacteria	0.884212
GAGCACACGTCTGAACTCCAGTCACCGAGCGACATCTCGTATGCCGTCTTCTGCTTGAAAAAAAAAAAACGTCAAAACTTGAGGCTCAACCTCAAATCGC	d__Bacteria	0.860143
GAGCACACGTCTGAACTCCAGTCACCGAGCGACATCTCGTATGCCGTCTTCTGCTTGAAAAAAAAAAAGCGTCAAAACTTGAGGCTCAACCTCAAATCGC	d__Bacteria	0.866154
GAGCACACGTCTGAACTCCAGTCACCGAGCGACATCTCGTATGCCGTCTTCTGCTTGAAAAAAAAAAAGCGTCAAAACTTGATGCTCAACCTCAAATCGC	d__Bacteria	0.77726
GAGCACACGTCTGAACTCCAGTCACCGAGCGACATCTCGTATGCCGTCTTCTGCTTGAAAAAAAAAAAGTATGAAAGGCTTTTGCTTAACAAAAGTTTGT	d__Bacteria	0.718941
GAGCACACGTCTGAACTCCAGTCACCGAGCGACATCTCGTATGCCGTCTTCTGCTTGAAAAAAAAAAGACGTCAAAACTTGAGGCTCAACCTCAAATCGC	d__Bacteria	0.873426
GAGCACACGTCTGAACTCCAGTCACCGAGCGACATCTCGTATGCCGTCTTCTGCTTGAAAAAAAAAAGATGTGAAAGCCCTCGGCTTAACCGAGGAGGGT	d__Bacteria	0.97857
GAGCACACGTCTGAACTCCAGTCACCGAGCGACATCTCGTATGCCGTCTTCTGCTTGAAAAAAAAATGGCGTCAAAACTTGAGGCTCAACCTCAAATCGC	d__Bacteria	0.855562
GAGCACACGTCTGAACTCCAGTCACCGAGCGACATCTCGTATGCCGTCTTCTGCTTGAAAAAAAACAGGCGTCAAAACTTGAGGCTCAACCTCAAATCGC	d__Bacteria	0.918805
GAGCACACGTCTGAACTCCAGTCACCGAGCGACATCTCGTATGCCGTCTTCTGCTTGAAAAAAAACTAGCGTCAAAACTTGAGGCTCAACCTCAAATCGC	d__Bacteria	0.879966
GAGCACACGTCTGAACTCCAGTCACCGAGCGACATCTCGTATGCCGTCTTCTGCTTGAAAAAAAACTGGCGTCAAAACTTGAGGCTCAACCTCAAATCGC	d__Bacteria	0.890673
GAGCACACGTCTGAACTCCAGTCACCGAGCGACATCTCGTATGCCGTCTTCTGCTTGAAAAAAGACTGGCGTCAAAACTTGAGGCTCAACCTCAAATCGC	d__Bacteria	0.896021
GAGCACACGTCTGAACTCCAGTCACCGAGCGTCATCTCGTATGCCGTCTTCTGCTTGAAAAAAAAAAGGCGTCAAAACTTGAGGCTCAACCTCAAATCGC	d__Bacteria	0.788194
GAGCACATTAGAAACCCCAGTAGTCCATGACGAGATCGGAAGAGCACACGTCTGAATCCAGTCACCGAGAGTTATCTCGTATGCCGTCTTCTGCTTGAAA	d__Bacteria	0.726282
GAGCACATTAGAAACCCCTGTAGTCCATGACGAGATCGGAAGAGCACACGTCTGAACTCAGTCACCGAGAGTTATCTCGTATGCCGTCTTCTGCTTGAAA	d__Bacteria	0.75424
GAGCACATTAGAAACCCGAGTAGTCCATGACGAGATCGGAGAGCACACGTCTGAACTCCAGTCACCGAGAGTTATCTCGTATGCCGTCTTCTGCTTGAAA	d__Bacteria	0.738658
GAGCACATTAGAAACCCGAGTAGTCCATGACGAGTCGGAAGAGCACACGTCTGAACTCCAGTCACCGAGAGTTATCTCGTATGCCGTCTTCTGCTTGAAA	d__Bacteria	0.74424
GAGCACATTAGAAACCCGGGTAGTCCATGACGAGATCGGAAGAGCACACGTCTGACTCCAGTCACCGAGAGTTATCTCGTATGCCGTCTTCTGCTTGAAA	d__Bacteria	0.793482
GAGCACATTAGAAACCCGTGTAGTCCATGACGAGATCGGAAAGCACACGTCTGAACTCCAGTCACCGAGAGTTATCTCGTATGCCGTCTTCTGCTTGAAA	d__Bacteria	0.712684
GAGCACATTAGAAACCCTAGTAGTCCATGACGAGATCCGGAAGAGCACACGTCTGAACTCCAGTCACCGAGAGTTATCTCGTATGCCGTCTTCTGCTTGA	d__Bacteria	0.78537
GAGCACATTAGAAACCCTAGTAGTCCATGACGAGATCGGAAAGCACACGTCTGAACTCCAGTCACCGAGAGTTATCTCGTATGCCGTCTTCTGCTTGAAA	d__Bacteria	0.709843
GAGCACATTAGAAACCCTAGTAGTCCATGACGAGATCGGAAGAGCACACGTCGAACTCCAGTCACCGAGAGTTATCTCGTATGCCGTCTTCTGCTTGAAA	d__Bacteria	0.769243
GAGCACATTAGAAACCCTAGTAGTCCATGACGAGATCGGAAGAGCACACGTCTAACTCCAGTCACCGAGAGTTATCTCGTATGCCGTCTTCTGCTTGAAA	d__Bacteria	0.8075
GAGCACATTAGAAACCCTAGTAGTCCATGACGAGATCGGAAGAGCACACGTCTTGAACTCCAGTCACACGCTACTATCTCGTATGCCGTCTTCTGCTTGA	d__Bacteria	0.794305
GAGCACATTAGAAACCCTGGTAGTCCATGACGAGATCGGAAAGCACACGTCTGAACTCCAGTCACCGAGAGTTATCTCGTATGCCGTCTTCTGCTTGAAA	d__Bacteria	0.719538
GAGCACATTAGAAACCCTGGTAGTCCATGACGAGATCGGAAGAGCACACGTCTGACTCCAGTCACCGAGAGTTATCTCGTATGCCGTCTTCTGCTTGAAA	d__Bacteria	0.775348
GAGCACATTAGAAACCCTTGTAGTCCATGACGAATCGGAAGAGCACACGTCTGAACTCCAGTCACCGAGAGTTATCTCGTATGCCGTCTTCTGCTTGAAA	d__Bacteria	0.800968
GAGCACATTAGAAACCCTTGTAGTCCATGACGAGATCGGAAGAGCACACGTCTAACTCCAGTCACCGAGAGTTATCTCGTATGCCGTCTTCTGCTTGAAA	d__Bacteria	0.792748
GAGCACATTAGAAACCCTTGTAGTCCATGACGAGATGGAAGAGCACACGTCTGAACTCCAGTCACCGAGAGTTATCTCGTATGCCGTCTTCTGCTTGAAA	d__Bacteria	0.731445
GAGCACATTAGATACCCGAGTAGTCCATGACGAGATCGGAAGACACACGTCTGAACTCCAGTCACCGAGAGTTATCTCGTATGCCGTCTTCTGCTTGAAA	d__Bacteria	0.74568
GAGCACATTAGATACCCGGGTAGTCCATGACGAGTCGGAAGAGCACACGTCTGAACTCCAGTCACCGAGAGTTATCTCGTATGCCGTCTTCTGCTTGAAA	d__Bacteria	0.72203
GAGCACATTAGATACCCTAGTAGTCCATGACGAGATCGGAAGACACACGTCTGAACTCCAGTCACCGAGAGTTATCTCGTATGCCGTCTTCTGCTTGAAA	d__Bacteria	0.719367
GAGCACATTAGATACCCTAGTAGTCCATGACGAGATCGGAAGAGCACACGTCTGACTCCAGTCACCGAGAGTTATCTCGTATGCCGTCTTCTGCTTGAAA	d__Bacteria	0.749058
GAGCACATTAGATACCCTAGTAGTCCATGACGAGATCGGAAGAGCCACGTCTGAACTCCAGTCACCGAGAGTTATCTCGTATGCCGTCTTCTGCTTGAAA	d__Bacteria	0.736835
GAGCACATTAGATACCCTTGTAGTCCATGACGAGATCGGAAAGCACACGTCTGAACTCCAGTCACCGAGAGTTATCTCGTATGCCGTCTTCTGCTTGAAA	d__Bacteria	0.703144
GAGCACATTAGATACCCTTGTAGTCCATGACGAGATCGGAGAGCACACGTCTGAACTCCAGTCACCGAGAGTTATCTCGTATGCCGTCTTCTGCTTGAAA	d__Bacteria	0.735534
GAGCATTAGAAACCCGAGTAGTCCATGACGAATCGGAAGAGCACACGTCTGAACTCCAGTCACACTACGACATCTCGTATGCCGTCTTCTGCTTGAAAAA	d__Bacteria	0.915077
GAGCATTAGATACCCCGGTAGTCCATGACGAGATCGGAAGAGCACCACGTCTGAACTCCAGTCACCGAGAGTTATCTCGTATGCCGTCTTCTGCTTGAAA	d__Bacteria	0.803817
GAGCCATTAGATACCCTGGTAGTCCATGACGGGAAGAGCGCACGTCTGAACTCCAGTCACCGAGAGTTATCTCGTATGCCGTCTTCTGCTTGAAAAAAAA	d__Bacteria	0.730236
GAGCGTATTAGAAACCCGAGTAGTCCATGACGAGATCGGAAGACACACGTCTGAACTCCAGTCACCGAGAGTTATCTCGTATGCCGTCTTCTGCTTGAAA	d__Bacteria	0.735601
GAGCGTATTAGAAACCCGAGTAGTCCATGACGAGATCGGAAGAGCACACGTCTGAATCCAGTCACCGAGAGTTATCTCGTATGCCGTCTTCTGCTTGAAA	d__Bacteria	0.760981
GAGCGTATTAGAAACCCGAGTAGTCCATGACGAGATCGGAGAGCACACGTCTGAACTCCAGTCACTAGTCTCCATCTCGTATGCCGTCTTCTGCTTGAAA	d__Bacteria	0.750943
GAGCGTATTAGAAACCCTAGTAGTCCATGACGAGATCGGAAGAGCACACGTCTAACTCCAGTCACCGAGAGTTATCTCGTATGCCGTCTTCTGCTTGAAA	d__Bacteria	0.786038
GAGCGTATTAGAAACCCTGGTAGTCCATGACGAGATCGGAAGAGCACACGCTGAACTCCAGTCACCGAGAGTTATCTCGTATGCCGTCTTCTGCTTGAAA	d__Bacteria	0.795363
GAGCGTATTAGAAACCCTTGTAGTCCATGACGAGACGGAAGAACACACGTCTGAACTCCAGTCACTAGTCTCCATCTCGTATGCCGTCTTCTGCTTGAAA	d__Bacteria	0.777281
GAGCGTCGTATTAGAAACCCTGGTAGTCCATGACGAGATCGGAAGAGCCACACGTCTGAACTCCAGTCACCGAGAGTTATCTCGTATGCCGTCTTCTGCT	d__Bacteria	0.794411
GAGCGTCGTATTAGATACCCGTGTAGTCCATGACGAAATCGGAAGAGCACACGTCTGACTCCAGTCACCGAGAGTTATCTCGTATGCCGTCTTCTGCTTG	d__Bacteria	0.75281
GAGGAGTGATTAGATACCCTGGTATTAGAAACCCTGGTGTCCATGACGAAATCGGAAAGCACACGTCTGAACTCCAGTCACGTCTATGAATCTCGTATGC	d__Bacteria	0.835991
GAGGATGCTAGCGTTATTCGGAATGAATGGGCGTAAAGAGTCTGTAGGTAGCTTAAAAAGTCTTTTGAGAAATATTTAGGCTTAACCTAAAAAGTTTAAG	d__Bacteria	0.988883
GAGGATGCTAGCGTTATTCGGAATGAATGGGCGTAAAGAGTCTGTAGGTAGCTTAAAAAGTCTTTTGAGGAATATTTAGGCTTAACCTAAAAAGTTTAAG	d__Bacteria	0.989228
GAGGCAAGCTCGTGGAGTCCATCGGAAGCGGTCAGCACGTGGAACTCAAGGCTGAAGCCATAGAAGTCTATGGTGAATGCGATCCGATGAGATATCCTCT	d__Bacteria	0.732711
GAGGGGACAAGCGTTATTCATCCTTATTGGGCGTAAAGGGTATGTAGGTTATGAAAGAGATTTTTTCTGAAATTTCAAATTTGCGTTTTGAAAGTGGACT	d__Bacteria	0.975327
GAGTATTAGAAACCCCAGTAGTCCATGACGAGATCGGAAGGCACACGTCTGAACTCCAGTCACTAGTCTCCATCTCGTATGCCGTCTTCTGCTTGAAAAA	d__Bacteria	0.744458
GAGTATTAGAAACCCCGGTAGTCCATGACGAGATCGGAAAAGCACACGTCTGAACCTCCAGTCACTAGTCTCCATCTCGTATGCCGTCTTCTGCTTGAAA	d__Bacteria	0.828577
GAGTATTAGAAACCCCGGTAGTCCATGACGAGATCGGAAAGCACACGTCTGAACTCCAGTCACGTCTGCTAATCTCGTATGCCGTCTTCTGCTTGAAAAA	d__Bacteria	0.729642
GAGTATTAGAAACCCCGGTAGTCCATGACGAGATCGGAAGAGCACACGTCTGACTCCAGTCACCGAGAGTTATCTCGTATGCCGTCTTCTGCTTGAAAAA	d__Bacteria	0.77929
GAGTATTAGAAACCCCGGTAGTCCATGACGAGATCGGAAGAGCACACGTCTGACTCCAGTCACTATAGCGAATCTCGTATGCCGTCTTCTGCTTGAAAAA	d__Bacteria	0.888054
GAGTATTAGAAACCCCGGTAGTCCATGACGAGATCGGAAGGCACACGTCTGAACTCCAGTCACCGAGAGTTATCTCGTATGCCGTCTTCTGCTTGAAAAA	d__Bacteria	0.735719
GAGTATTAGAAACCCCGGTAGTCCATGACGAGATGGAAGAGCACACGTCTGAACTCCAGTCACCGAGAGTTATCTCGTATGCCGTCTTCTGCTTGAAAAA	d__Bacteria	0.732934
GAGTATTAGAAACCCCGGTAGTCCATGACGAGATTCGGAAGAGCACACGTCTGAACTCCAGTCACCGAGAGTTATCTCGTATGCCGTCTTCTGCTTGAAA	d__Bacteria	0.802749
GAGTATTAGAAACCCCTGTAGTCCATGACGAGATCGGAAGAGCAACACGTCTGAACTCCAGTCACCGAGAGTTATCTCGTATGCCGTCTTCTGCTTGAAA	d__Bacteria	0.773267
GAGTATTAGAAACCCGAGTAGTCCATGACGAGATCGGAAGACACACGTCTGAACTCCAGTCACTATAGCGAATCTCGTATGCCGTCTTCTGCTTGAAAAA	d__Bacteria	0.868453
GAGTATTAGAAACCCGAGTAGTCCATGACGAGATCGGAAGAGCACACGCTGAACTCCAGTCACCGAGAGTTATCTCGTATGCCGTCTTCTGCTTGAAAAA	d__Bacteria	0.807684
GAGTATTAGAAACCCGAGTAGTCCATGACGAGATCGGAAGGCACACGTCTGAACTCCAGTCACGACATAGTATCTCGTATGCCGTCTTCTGCTTGAAAAA	d__Bacteria	0.787524
GAGTATTAGAAACCCGAGTAGTCCATGACGAGATCGGAGAGCACACGTCTGAACTCCAGTCACCGAGAGTTATCTCGTATGCCGTCTTCTGCTTGAAAAA	d__Bacteria	0.715367
GAGTATTAGAAACCCGGGTAGTCCATGACGAGATCGGAAAGCACACGTCTGAACTCCAGTCACGTCTATGAATCTCGTATGCCGTCTTCTGCTTGAAAAA	d__Bacteria	0.79783
GAGTATTAGAAACCCGGGTAGTCCATGACGAGATCGGAAGAGCACACGTCTAACTCCAGTCACCGAGAGTTATCTCGTATGCCGTCTTCTGCTTGAAAAA	d__Bacteria	0.8037
GAGTATTAGAAACCCGGGTAGTCCATGACGAGATCGGAAGAGCACACGTCTGAACTCAGTCACCGAGAGTTATCTCGTATGCCGTCTTCTGCTTGAAAAA	d__Bacteria	0.804386
GAGTATTAGAAACCCGGGTAGTCCATGACGAGATCGGAAGAGCACACGTTGAACTCCAGTCACCGAGAGTTATCTCGTATGCCGTCTTCTGCTTGAAAAA	d__Bacteria	0.779311
GAGTATTAGAAACCCGTGTAGTCCATGACGAGATCGGAAGACACACGTCTGAACTCCAGTCACGACATAGTATCTCGTATGCCGTCTTCTGCTTGAAAAA	d__Bacteria	0.77764
GAGTATTAGAAACCCGTGTAGTCCATGACGAGGGAAGAGCACACGTCTGAACTCCAGTCACTATAGCGAATCTCGTATGCCGTCTTCTGCTTGAAAAAAA	d__Bacteria	0.874042
GAGTATTAGAAACCCTAGTAGTCCATGACGAGATCCGGAAGAGCACACGTCTGAACTCCAGTCACTAGTCTCCATCTCGTATGCCGTCTTCTGCTTGAAA	d__Bacteria	0.854969
GAGTATTAGAAACCCTAGTAGTCCATGACGAGATCGGAAGAGCACACGTCTGACTCCAGTCACGACATAGTATCTCGTATGCCGTCTTCTGCTTGAAAAA	d__Bacteria	0.797826
GAGTATTAGAAACCCTAGTAGTCCATGACGAGATCGGAGAGCACACGTCTGAACTCCAGTCACCGAGAGTTATCTCGTATGCCGTCTTCTGCTTGAAAAA	d__Bacteria	0.706144
GAGTATTAGAAACCCTAGTAGTCCATGACGAGATTCGGAAGAGCACACGTCTGAACTCCAGTCACCGAGAGTTATCTCGTATGCCGTCTTCTGCTTGAAA	d__Bacteria	0.789276
GAGTATTAGAAACCCTGGTAGTCCAGACGAGATCGGAAAGCACACGTCTGAACTCCAGTCACGTCTGCTAATCTCGTATGCCGTCTTCTGCTTGAAAAAA	d__Bacteria	0.703807
GAGTATTAGAAACCCTGGTAGTCCATGACGAGATCGGAAAGCACACGTCTGAACTCCAGTCACGACATAGTATCTCGTATGCCGTCTTCTGCTTGAAAAA	d__Bacteria	0.743634
GAGTATTAGAAACCCTGGTAGTCCATGACGAGATCGGAAGAGCACACGTCTGAACCCAGTCACCGAGAGTTATCTCGTATGCCGTCTTCTGCTTGAAAAA	d__Bacteria	0.801007
GAGTATTAGAAACCCTGGTAGTCCATGACGAGATCGGAAGAGCACACGTCTGAACTCCATCACCGAGAGTTATCTCGTATGCCGTCTTCTGCTTGAAAAA	d__Bacteria	0.77831
GAGTATTAGAAACCCTGGTAGTCCATGACGAGATCGGAAGAGCACACGTCTGACTCCAGTCACCGAGAGTTATCTCGTATGCCGTCTTCTGCTTGAAAAA	d__Bacteria	0.761194
GAGTATTAGAAACCCTGGTAGTCCATGACGAGATTCGGAAGAGCACACGTCTGAACTCCAGTCACCGAGAGTTATCTCGTATGCCGTCTTCTGCTTGAAA	d__Bacteria	0.785773
GAGTATTAGAAACCCTTGTAGTCCATGACGAGATCGGAAGAGCACACGTCTGAACTCCCAGTCACCGAGAGTTATCTCGTATGCCGTCTTCTGCTTGAAA	d__Bacteria	0.831173
GAGTATTAGAAACCCTTGTAGTCCATGACGAGATCGGAAGAGCACACGTCTGACTCCAGTCACCGAGAGTTATCTCGTATGCCGTCTTCTGCTTGAAAAA	d__Bacteria	0.745392
GAGTATTAGAAACCCTTGTAGTCCATGACGAGATCGGAAGAGCACACGTTGAACTCCAGTCACCGAGAGTTATCTCGTATGCCGTCTTCTGCTTGAAAAA	d__Bacteria	0.74472
GAGTATTAGAAACCCTTGTAGTCCATGACGAGATCGGAAGGCACACGTCTGAACTCCAGTCACCGAGAGTTATCTCGTATGCCGTCTTCTGCTTGAAAAA	d__Bacteria	0.722952
GAGTATTAGAAACCCTTGTAGTCCATGACGAGATCGGAGAGCTCACGTCTGAACTCCAGTCACCGAGAGTTATCTCGTATGCCGTCTTCTGCTTGAAAAA	d__Bacteria	0.716802
GAGTATTAGATACCCCAGTAGTCCATGACGAGATCGGAAAGCACACGTCTGAACTCCAGTCACTATAGCGAATCTCGTATGCCGTCTTCTGCTTGAAAAA	d__Bacteria	0.763618
GAGTATTAGATACCCCAGTAGTCCATGACGAGATCGGAAGAAGCACACGTCTGAACTCCAGTCACCGAGAGTTATCTCGTATGCCGTCTTCTGCTTGAAA	d__Bacteria	0.714595
GAGTATTAGATACCCCAGTAGTCCATGACGAGATCGGAAGAGCACACGTCTGACTCCAGTCACGACATAGTATCTCGTATGCCGTCTTCTGCTTGAAAAA	d__Bacteria	0.719851
GAGTATTAGATACCCCAGTAGTCCATGACGAGATCGGAGAGCACACGTCTGAACTCCAGTCACGTCTATGAATCTCGTATGCCGTCTTCTGCTTGAAAAA	d__Bacteria	0.728434
GAGTATTAGATACCCCGAGTAGTCCATGACGAGGAGCACACGTCTGAACTCCAGTCACTATAGTGAATCTCGTATGCCGTCTTCTGCTTGAAAAAAAAAA	d__Bacteria	0.75462
GAGTATTAGATACCCCGGTAGTCCATGACGAGAGGAAGAACACACGTCTGAACTCCAGTCACGTCTGCTAATCTCGTATGCCGTCTTCTGCTTGAAAAAA	d__Bacteria	0.771981
GAGTATTAGATACCCCGGTAGTCCATGACGAGATCGAAGAGCACACGTCTGAACTCCAGTCACTATAGCGAATCTCGTATGCCGTCTTCTGCTTGAAAAA	d__Bacteria	0.709074
GAGTATTAGATACCCCGGTAGTCCATGACGAGATCGGAAGAGCACACGTCTGACTCCAGTCACCGAGAGTTATCTCGTATGCCGTCTTCTGCTTGAAAAA	d__Bacteria	0.736851
GAGTATTAGATACCCCGGTAGTCTATGACGAATCGGAAGAACACACGTCTGAACTCCAGTCACTATAGCGAATCTCGTATGCCGTCTTCTGCTTGAAAAA	d__Bacteria	0.898153
GAGTATTAGATACCCCTGTAGTCCATGACGAGATCGGAAGAGCACACGTCTGAATCCAGTCACGACATAGTATCTCGTATGCCGTCTTCTGCTTGAAAAA	d__Bacteria	0.707288
GAGTATTAGATACCCGAGTAGTCCATGACGAATCGGAAGAGCACACGTCTGAACTCCAGTCACCGAGAGTTATCTCGTATGCCGTCTTCTGCTTGAAAAA	d__Bacteria	0.77701
GAGTATTAGATACCCGAGTAGTCCATGACGAGATCCGGAAGAGCACACGTCTGAACTCCAGTCACCGAGAGTTATCTCGTATGCCGTCTTCTGCTTGAAA	d__Bacteria	0.81088
GAGTATTAGATACCCGGGTAGTCCATGACGAGATCGGAAGAGCACACGTCTGAACCCAGTCACCGAGAGTTATCTCGTATGCCGTCTTCTGCTTGAAAAA	d__Bacteria	0.786917
GAGTATTAGATACCCGTGTAGTCCATGACGAGATCGGAAGAGCACACGTCTGAACTCAGTCACCGAGAGTTATCTCGTATGCCGTCTTCTGCTTGAAAAA	d__Bacteria	0.765174
GAGTATTAGATACCCGTGTAGTCCATGACGAGATCGGAAGAGCACACGTCTGACTCCAGTCACGACATAGTATCTCGTATGCCGTCTTCTGCTTGAAAAA	d__Bacteria	0.770752
GAGTATTAGATACCCGTGTAGTCCATGACGAGATCGGAGAGCACACGTCTGAACTCCAGTCACGACATAGTATCTCGTATGCCGTCTTCTGCTTGAAAAA	d__Bacteria	0.716263
GAGTATTAGATACCCTAGTAGTCCATGACGAGATCGGAAGAGCACACGTCTGACTCCAGTCACCGAGAGTTATCTCGTATGCCGTCTTCTGCTTGAAAAA	d__Bacteria	0.727604
GAGTATTAGATACCCTAGTAGTCCATGACGAGGGAAGAGCACACGTCTGAACTCCAGTCACGTCTGCTAATCTCGTATGCCGTCTTCTGCTTGAAAAAAA	d__Bacteria	0.732351
GAGTATTAGATACCCTGGTAGTCCATGACGAGATCGGAAGAGCACACGTCTGACTCCAGTCACCGAGAGTTATCTCGTATGCCGTCTTCTGCTTGAAAAA	d__Bacteria	0.708224
GAGTATTAGATACCCTGGTAGTCCATGACGGGATCGGAAGAGCACACGTCTGATCCAGTCACTATAGCGAATCTCGTATGCCGTCTTCTGCTTGAAAAAA	d__Bacteria	0.73099
GAGTATTAGATACCCTTGTAGTCCATGACGAGATCGGAAAGCACACGTCTGAACTCCAGTCACGTCTGCTAATCTCGTATGCCGTCTTCTGCTTGAAAAA	d__Bacteria	0.721363
GAGTATTAGATACCCTTGTAGTCCATGACGAGATCGGAAGACACACGTCTGAACTCCAGTCACCGAGAGTTATCTCGTATGCCGTCTTCTGCTTGAAAAA	d__Bacteria	0.735697
GAGTGATCAGAAACCCGAGTAGTCCATGACGAGATTCGGAAGAGCACACGTCTGAACTCCAGTCACCGAGAGTTATCTCGTATGCCGTCTTCTGCTTGAA	d__Bacteria	0.748103
GAGTGATTAGAAACATTAGAAACCCCTGTAGTCCATGACGAGATCGGAAGAGCACACGTCTAACTCCAGTCACGTCTGCTAATCTCGTATGCCGTCTTCT	d__Bacteria	0.702566
GAGTGATTAGAAACATTAGAAACCCGAGTAGTCCATGACGAGATCGGAAGAGCACACGTCTAACTCCAGTCACGTCTGCTAATCTCGTATGCCGTCTTCT	d__Bacteria	0.783532
GAGTGATTAGAAACATTAGATACCCGTGTAGTCCATGACGAGATCGGAAGAGCACACGTCTGAACTCAGTCACGTCTGCTAATCTCGTATGCCGTCTTCT	d__Bacteria	0.773679
GAGTGATTAGAAACCCCAGTAGTCCATGACGAATCGGAAGAGCACACGTCTGAACTCCAGTCACGTCTATGAATCTCGTATGCCGTCTTCTGCTTGAAAA	d__Bacteria	0.768694
GAGTGATTAGAAACCCCAGTAGTCCATGACGAGAGGAAGAGCACACGTCTGAACTCCAGTCACGTCTATGAATCTCGTATGCCGTCTTCTGCTTGAAAAA	d__Bacteria	0.720369
GAGTGATTAGAAACCCCAGTAGTCCATGACGAGATCCGGAAGAGCACACGTCTGAACTCCAGTCACGACATAGTATCTCGTATGCCGTCTTCTGCTTGAA	d__Bacteria	0.702985
GAGTGATTAGAAACCCCAGTAGTCCATGACGAGATCCGGAAGAGCACACGTCTGAACTCCAGTCACGTCTGCTAATCTCGTATGCCGTCTTCTGCTTGAA	d__Bacteria	0.7028
GAGTGATTAGAAACCCCAGTAGTCCATGACGAGATCCGGAAGAGCACACGTCTGAACTCCAGTCACTAGTCTCCATCTCGTATGCCGTCTTCTGCTTGAA	d__Bacteria	0.734207
GAGTGATTAGAAACCCCAGTAGTCCATGACGAGATCGGAAGAGCACACGCTGAACTCCAGTCACGACATAGTATCTCGTATGCCGTCTTCTGCTTGAAAA	d__Bacteria	0.728386
GAGTGATTAGAAACCCCAGTAGTCCATGACGAGATCGGAAGAGCACACGTCTGAACTCAGTCACACTACGACATCTCGTATGCCGTCTTCTGCTTGAAAA	d__Bacteria	0.853965
GAGTGATTAGAAACCCCAGTAGTCCATGACGAGATCGGAAGAGCACACGTCTGAACTCCATCACGACATAGTATCTCGTATGCCGTCTTCTGCTTGAAAA	d__Bacteria	0.723245
GAGTGATTAGAAACCCCAGTAGTCCATGACGAGATCGGAAGAGCACACGTCTGAATCCAGTCACACTACGACATCTCGTATGCCGTCTTCTGCTTGAAAA	d__Bacteria	0.824353
GAGTGATTAGAAACCCCAGTAGTCCATGACGAGATCGGAAGAGCACACGTCTGAATCCAGTCACCGAGCGACATCTCGTATGCCGTCTTCTGCTTGAAAA	d__Bacteria	0.759796
GAGTGATTAGAAACCCCAGTAGTCCATGACGAGATCGGAAGAGCACACGTCTGAATCCAGTCACGTCTATGAATCTCGTATGCCGTCTTCTGCTTGAAAA	d__Bacteria	0.736468
GAGTGATTAGAAACCCCAGTAGTCCATGACGAGATCGGAAGAGCACACGTCTGACTCCAGTCACACTACGACATCTCGTATGCCGTCTTCTGCTTGAAAA	d__Bacteria	0.828706
GAGTGATTAGAAACCCCAGTAGTCCATGACGAGATCGGAAGAGCACAGTCTGAACTCCAGTCACGTCTATGAATCTCGTATGCCGTCTTCTGCTTGAAAA	d__Bacteria	0.755201
GAGTGATTAGAAACCCCAGTAGTCCATGACGAGATCGGAAGGCACACGTCTGAACTCCAGTCACGTCTATGAATCTCGTATGCCGTCTTCTGCTTGAAAA	d__Bacteria	0.715766
GAGTGATTAGAAACCCCAGTAGTCCATGACGAGATCGGAGAGCACACGTCTGAACTCCAGTCACACTACGACATCTCGTATGCCGTCTTCTGCTTGAAAA	d__Bacteria	0.776944
GAGTGATTAGAAACCCCAGTAGTCCATGACGAGATCGGAGAGCACACGTCTGAACTCCAGTCACCGAGCGACATCTCGTATGCCGTCTTCTGCTTGAAAA	d__Bacteria	0.716346
GAGTGATTAGAAACCCCAGTAGTCCATGACGAGATCGGGAAGAGCACACGTCTGAACTCCAGTCACGACATAGTATCTCGTATGCCGTCTTCTGCTTGAA	d__Bacteria	0.710647
GAGTGATTAGAAACCCCGGTAGTCCATGACGAATCGGAAGAGCACACGTCTGAACTCCAGTCACGTCTATGAATCTCGTATGCCGTCTTCTGCTTGAAAA	d__Bacteria	0.818796
GAGTGATTAGAAACCCCGGTAGTCCATGACGAGAATCGGAAGAGCACACGTCTGAACTCCAGTCACGTCTATGAATCTCGTATGCCGTCTTCTGCTTGAA	d__Bacteria	0.769172
GAGTGATTAGAAACCCCGGTAGTCCATGACGAGACGGAAGAGCACACGTCTGAACTCCAGTCACGTCTATGAATCTCGTATGCCGTCTTCTGCTTGAAAA	d__Bacteria	0.736593
GAGTGATTAGAAACCCCGGTAGTCCATGACGAGAGGAAGAGCACACGTCTGAACTCCAGTCACGTCTATGAATCTCGTATGCCGTCTTCTGCTTGAAAAA	d__Bacteria	0.779263
GAGTGATTAGAAACCCCGGTAGTCCATGACGAGATCCGGAAGAGCACACGTCTGAACTCCAGTCACCGAGAGTTATCTCGTATGCCGTCTTCTGCTTGAA	d__Bacteria	0.745317
GAGTGATTAGAAACCCCGGTAGTCCATGACGAGATCCGGAAGAGCACACGTCTGAACTCCAGTCACGTCTATGAATCTCGTATGCCGTCTTCTGCTTGAA	d__Bacteria	0.826671
GAGTGATTAGAAACCCCGGTAGTCCATGACGAGATCGGAAGACACACGTCTGAACTCCAGTCACACTACGACATCTCGTATGCCGTCTTCTGCTTGAAAA	d__Bacteria	0.849609
GAGTGATTAGAAACCCCGGTAGTCCATGACGAGATCGGAAGAGCACACGCTGAACTCCAGTCACGTCTATGAATCTCGTATGCCGTCTTCTGCTTGAAAA	d__Bacteria	0.840278
GAGTGATTAGAAACCCCGGTAGTCCATGACGAGATCGGAAGAGCACACGTCTAACTCCAGTCACCGAGAGTTATCTCGTATGCCGTCTTCTGCTTGAAAA	d__Bacteria	0.751985
GAGTGATTAGAAACCCCGGTAGTCCATGACGAGATCGGAAGAGCACACGTCTGAACCCAGTCACCGAGAGTTATCTCGTATGCCGTCTTCTGCTTGAAAA	d__Bacteria	0.762432
GAGTGATTAGAAACCCCGGTAGTCCATGACGAGATCGGAAGAGCACACGTCTGAACCTCCAGTCACCGAGAGTTATCTCGTATGCCGTCTTCTGCTTGAA	d__Bacteria	0.774246
GAGTGATTAGAAACCCCGGTAGTCCATGACGAGATCGGAAGAGCACACGTCTGAACTCAGTCACACTACGACATCTCGTATGCCGTCTTCTGCTTGAAAA	d__Bacteria	0.891735
GAGTGATTAGAAACCCCGGTAGTCCATGACGAGATCGGAAGAGCACACGTCTGAACTCAGTCACCGAGAGTTATCTCGTATGCCGTCTTCTGCTTGAAAA	d__Bacteria	0.753228
GAGTGATTAGAAACCCCGGTAGTCCATGACGAGATCGGAAGAGCACACGTCTGACTCCAGTCACACTACGACATCTCGTATGCCGTCTTCTGCTTGAAAA	d__Bacteria	0.874052
GAGTGATTAGAAACCCCGGTAGTCCATGACGAGATCGGAAGAGCACACGTCTGACTCCAGTCACCGAGAGTTATCTCGTATGCCGTCTTCTGCTTGAAAA	d__Bacteria	0.717772
GAGTGATTAGAAACCCCGGTAGTCCATGACGAGATCGGAAGAGCACACGTCTGACTCCAGTCACTATAGCGAATATCGTATGCCGTCTTCTGCTTGAAAA	d__Bacteria	0.819872
GAGTGATTAGAAACCCCGGTAGTCCATGACGAGATCGGAAGAGCACACGTCTGACTCCAGTCACTATAGCGAATCTCGTATGCCGTCTTCTGCTTGAAAA	d__Bacteria	0.849446
GAGTGATTAGAAACCCCGGTAGTCCATGACGAGATCGGAAGAGCACCACGTCTGAACTCCAGTCACGTCTATGAATCTCGTATGCCGTCTTCTGCTTGAA	d__Bacteria	0.836627
GAGTGATTAGAAACCCCGGTAGTCCATGACGAGATCGGAAGAGGCACACGTCTGAACTCCAGTCACGTCTATGAATCTCGTATGCCGTCTTCTGCTTGAA	d__Bacteria	0.8399
GAGTGATTAGAAACCCCGGTAGTCCATGACGAGATCGGAAGGCACACGTCTGAACTCCAGTCACACTACGACATCTCGTATGCCGTCTTCTGCTTGAAAA	d__Bacteria	0.842129
GAGTGATTAGAAACCCCGGTAGTCCATGACGAGATCGGGAAGAGCACACGTCTGAACTCCAGTCACGTCTATGAATCTCGTATGCCGTCTTCTGCTTGAA	d__Bacteria	0.818345
GAGTGATTAGAAACCCCGGTAGTCCATGACGAGATTCGGAAGAGCACACGTCTGAACTCCAGTCACGTCTATGAATCTCGTATGCCGTCTTCTGCTTGAA	d__Bacteria	0.792661
GAGTGATTAGAAACCCCGGTAGTCCATGACGAGTCGGAAGAGCACACGTCTGAACTCCAGTCACGTCTATGAATCTCGTATGCCGTCTTCTGCTTGAAAA	d__Bacteria	0.761016
GAGTGATTAGAAACCCCGGTAGTCCATGACGGGATCGGAAGAGCAACGTCTGAACTCCAGTCACACTACGACATCTCGTATGCCGTCTTCTGCTTGAAAA	d__Bacteria	0.836074
GAGTGATTAGAAACCCCTGTAGTCCATGACGAATCGGAAAAGCACACGTCTGAACTCCAGTCACACTACGACATCTCGTATGCCGTCTTCTGCTTGAAAA	d__Bacteria	0.782596
GAGTGATTAGAAACCCCTGTAGTCCATGACGAGATCGGAAAGCACACGTCTGAACTCCAGTCACACTACGACATCTCGTATGCCGTCTTCTGCTTGAAAA	d__Bacteria	0.739946
GAGTGATTAGAAACCCCTGTAGTCCATGACGAGATCGGAAGACACACGTCTGAACTCCAGTCACACTACGACATCTCGTATGCCGTCTTCTGCTTGAAAA	d__Bacteria	0.784117
GAGTGATTAGAAACCCCTGTAGTCCATGACGAGATCGGAAGAGCACACGCTGAACTCCAGTCACGACATAGTATCTCGTATGCCGTCTTCTGCTTGAAAA	d__Bacteria	0.710689
GAGTGATTAGAAACCCCTGTAGTCCATGACGAGATCGGAAGAGCACACGTCTGAACTCAGTCACGTCTATGAATCTCGTATGCCGTCTTCTGCTTGAAAA	d__Bacteria	0.767993
GAGTGATTAGAAACCCCTGTAGTCCATGACGAGATCGGAAGAGGCACACGTCTGAACTCCAGTCACGACATAGTATCTCGTATGCCGTCTTCTGCTTGAA	d__Bacteria	0.712421
GAGTGATTAGAAACCCGAGTAGTCCATGACGAATCGGAAGAGCACACGTCTGAACTCCAGTCACACTACGACATCTCGTATGCCGTCTTCTGCTTGAAAA	d__Bacteria	0.893858
GAGTGATTAGAAACCCGAGTAGTCCATGACGAGAGGAAGAGCACACGTCTGAACTCCAGTCACGTCTATGAATCTCGTATGCCGTCTTCTGCTTGAAAAA	d__Bacteria	0.775455
GAGTGATTAGAAACCCGAGTAGTCCATGACGAGATCCGGAAGAGCACACGTCTGAACTCCAGTCACCGAGAGTTATCTCGTATGCCGTCTTCTGCTTGAA	d__Bacteria	0.741107
GAGTGATTAGAAACCCGAGTAGTCCATGACGAGATCGGAAAGAGCACACGTCTGAACTCCAGTCACCGAGAGTTATCTCGTATGCCGTCTTCTGCTTGAA	d__Bacteria	0.720211
GAGTGATTAGAAACCCGAGTAGTCCATGACGAGATCGGAAAGCACACGTCTGAACTCCAGTCACACTACGACATCTCGTATGCCGTCTTCTGCTTGAAAA	d__Bacteria	0.813947
GAGTGATTAGAAACCCGAGTAGTCCATGACGAGATCGGAAAGCACACGTCTGAACTCCAGTCACTATAGCGAATCTCGTATGCCGTCTTCTGCTTGAAAA	d__Bacteria	0.786972
GAGTGATTAGAAACCCGAGTAGTCCATGACGAGATCGGAAGACACACGTCTGAACTCCAGTCACGTCTATGAATCTCGTATGCCGTCTTCTGCTTGAAAA	d__Bacteria	0.774451
GAGTGATTAGAAACCCGAGTAGTCCATGACGAGATCGGAAGAGCACACGCTGAACTCCAGTCACCGAGAGTTATCTCGTATGCCGTCTTCTGCTTGAAAA	d__Bacteria	0.754415
GAGTGATTAGAAACCCGAGTAGTCCATGACGAGATCGGAAGAGCACACGTCGTCTGAACTCCAGTCACAACATAGTATCTCGTATGCCGTCTTCTGCTTG	d__Bacteria	0.753784
GAGTGATTAGAAACCCGAGTAGTCCATGACGAGATCGGAAGAGCACACGTCTAACTCCAGTCACCGAGAGTTATCTCGTATGCCGTCTTCTGCTTGAAAA	d__Bacteria	0.746102
GAGTGATTAGAAACCCGAGTAGTCCATGACGAGATCGGAAGAGCACACGTCTGAACTCCCAGTCACCGAGAGTTATCTCGTATGCCGTCTTCTGCTTGAA	d__Bacteria	0.770574
GAGTGATTAGAAACCCGAGTAGTCCATGACGAGATCGGAAGAGCACACGTCTGAATCCAGTCACCGAGCGACATCTCGTATGCCGTCTTCTGCTTGAAAA	d__Bacteria	0.812247
GAGTGATTAGAAACCCGAGTAGTCCATGACGAGATCGGAAGAGCACACGTCTGACTCCAGTCACCGAGCGACATCTCGTATGCCGTCTTCTGCTTGAAAA	d__Bacteria	0.821491
GAGTGATTAGAAACCCGAGTAGTCCATGACGAGATCGGAAGAGCACACGTCTGACTCCAGTCACGTCTATGAATCTCGTATGCCGTCTTCTGCTTGAAAA	d__Bacteria	0.802673
GAGTGATTAGAAACCCGAGTAGTCCATGACGAGATCGGAAGAGCACACGTCTGACTCCAGTCACTATAGCGAATCTCGTATGCCGTCTTCTGCTTGAAAA	d__Bacteria	0.844206
GAGTGATTAGAAACCCGAGTAGTCCATGACGAGATCGGAAGAGCACCACGTCTGAACTCCAGTCACCGAGAGTTATCTCGTATGCCGTCTTCTGCTTGAA	d__Bacteria	0.75708
GAGTGATTAGAAACCCGAGTAGTCCATGACGAGATCGGAAGAGCACGTCTGAACTCCAGTCACGACATAGTATCTCGTATGCCGTCTTCTGCTTGAAAAA	d__Bacteria	0.752686
GAGTGATTAGAAACCCGAGTAGTCCATGACGAGATCGGAAGAGCCACACGTCTGAACTCCAGTCACGTCTATGAATCTCGTATGCCGTCTTCTGCTTGAA	d__Bacteria	0.827502
GAGTGATTAGAAACCCGAGTAGTCCATGACGAGATCGGAAGGCACACGTCTGAACTCCAGTCACTAGTCTCCATCTCGTATGCCGTCTTCTGCTTGAAAA	d__Bacteria	0.740314
GAGTGATTAGAAACCCGAGTAGTCCATGACGAGATCGGGAAGAGCACACGTCTGAACTCCAGTCACCGAGAGTTATCTCGTATGCCGTCTTCTGCTTGAA	d__Bacteria	0.735125
GAGTGATTAGAAACCCGAGTAGTCCATGACGAGATGGAAGAGCACACGTCTGAACTCCAGTCACATCTATGAATCTCGTATGCCGTCTTCTGCTTGAAAA	d__Bacteria	0.721869
GAGTGATTAGAAACCCGGGTAGTCCATGACGAATCGGAAGAGCACACGTCTGAACTCCAGTCACCGAGAGTTATCTCGTATGCCGTCTTCTGCTTGAAAA	d__Bacteria	0.744544
GAGTGATTAGAAACCCGGGTAGTCCATGACGAATCGGAAGAGCACACGTCTGAACTCCAGTCACGTCTATGAATCTCGTATGCCGTCTTCTGCTTGAAAA	d__Bacteria	0.823126
GAGTGATTAGAAACCCGGGTAGTCCATGACGAGATCAGAAGAGCACACGTCTGAATCCAGTCACCGAGCGACATCTCGTATGCCGTCTTCTGCTTGAAAA	d__Bacteria	0.73326
GAGTGATTAGAAACCCGGGTAGTCCATGACGAGATCCGGAAGAGCACACGTCTGAACTCCAGTCACCGAGAGTTATCTCGTATGCCGTCTTCTGCTTGAA	d__Bacteria	0.74859
GAGTGATTAGAAACCCGGGTAGTCCATGACGAGATCCGGAAGAGCACACGTCTGAACTCCAGTCACGACATAGTATCTCGTATGCCGTCTTCTGCTTGAA	d__Bacteria	0.768901
GAGTGATTAGAAACCCGGGTAGTCCATGACGAGATCCGGAAGAGCACACGTCTGAACTCCAGTCACGTCTATGAATCTCGTATGCCGTCTTCTGCTTGAA	d__Bacteria	0.829257
GAGTGATTAGAAACCCGGGTAGTCCATGACGAGATCGGAAGAGCACACGTCGAACTCCAGTCACGTCTATGAATCTCGTATGCCGTCTTCTGCTTGAAAA	d__Bacteria	0.80145
GAGTGATTAGAAACCCGGGTAGTCCATGACGAGATCGGAAGAGCACACGTCGAACTCCAGTCACTAGTCTCCATCTCGTATGCCGTCTTCTGCTTGAAAA	d__Bacteria	0.764293
GAGTGATTAGAAACCCGGGTAGTCCATGACGAGATCGGAAGAGCACACGTCTGAACTCAGTCACCGAGAGTTATCTCGTATGCCGTCTTCTGCTTGAAAA	d__Bacteria	0.752166
GAGTGATTAGAAACCCGGGTAGTCCATGACGAGATCGGAAGAGCACACGTCTGAATCCAGTCACCGAGAGTTATCTCGTATGCCGTCTTCTGCTTGAAAA	d__Bacteria	0.703063
GAGTGATTAGAAACCCGGGTAGTCCATGACGAGATCGGAAGAGCACACGTCTGACTCCAGTCACCGAGAGTTATCTCGTATGCCGTCTTCTGCTTGAAAA	d__Bacteria	0.716376
GAGTGATTAGAAACCCGGGTAGTCCATGACGAGATCGGAAGAGCACACGTCTGACTCCAGTCACGTCTATGAATCTCGTATGCCGTCTTCTGCTTGAAAA	d__Bacteria	0.808898
GAGTGATTAGAAACCCGGGTAGTCCATGACGAGATCGGAAGGAGCACACGTCTGAACTCCAGTCACGTCTATGAATCTCGTATGCCGTCTTCTGCTTGAA	d__Bacteria	0.785475
GAGTGATTAGAAACCCGGGTAGTCCATGACGAGATCGGAAGGCACACGTCTGAACTCCAGTCACCGAGCGACATCTCGTATGCCGTCTTCTGCTTGAAAA	d__Bacteria	0.80079
GAGTGATTAGAAACCCGGGTAGTCCATGACGAGATCGGAGAGCACACGTCTGAACTCCAGTCACACTACGACATCTCGTATGCCGTCTTCTGCTTGAAAA	d__Bacteria	0.828048
GAGTGATTAGAAACCCGTGTAGTCCATGACGAAATCGGAAAGAGCACACGTCTGAACTCCAGTCACCGAGAGTTATCTCGTATGCCGTCTTCTGCTTGAA	d__Bacteria	0.751273
GAGTGATTAGAAACCCGTGTAGTCCATGACGAGATCGGAAAGAGCACACGTCTGAACTCCAGTCACGTCTATGAATCTCGTATGCCGTCTTCTGCTTGAA	d__Bacteria	0.811947
GAGTGATTAGAAACCCGTGTAGTCCATGACGAGATCGGAAAGCACACGTCTGAACTCCAGTCACCGAGCGACATCTCGTATGCCGTCTTCTGCTTGAAAA	d__Bacteria	0.746442
GAGTGATTAGAAACCCGTGTAGTCCATGACGAGATCGGAAGACACACGTCTGAACTCCAGTCACACTACGACATCTCGTATGCCGTCTTCTGCTTGAAAA	d__Bacteria	0.843916
GAGTGATTAGAAACCCGTGTAGTCCATGACGAGATCGGAAGAGCACACGCTGAACTCCAGTCACACTACGACATCTCGTATGCCGTCTTCTGCTTGAAAA	d__Bacteria	0.889353
GAGTGATTAGAAACCCGTGTAGTCCATGACGAGATCGGAAGAGCACACGTCTAACTCCAGTCACCGAGAGTTATCTCGTATGCCGTCTTCTGCTTGAAAA	d__Bacteria	0.734352
GAGTGATTAGAAACCCGTGTAGTCCATGACGAGATCGGAAGAGCACACGTCTGAACCCAGTCACCGAGAGTTATCTCGTATGCCGTCTTCTGCTTGAAAA	d__Bacteria	0.74565
GAGTGATTAGAAACCCGTGTAGTCCATGACGAGATCGGAAGAGCACACGTCTGAACTCAGTCACCGAGAGTTATCTCGTATGCCGTCTTCTGCTTGAAAA	d__Bacteria	0.742077
GAGTGATTAGAAACCCGTGTAGTCCATGACGAGATCGGAAGAGCACACGTCTGAACTCAGTCACGTCTATGAATCTCGTATGCCGTCTTCTGCTTGAAAA	d__Bacteria	0.836464
GAGTGATTAGAAACCCGTGTAGTCCATGACGAGATCGGAAGAGCACACGTCTGAATCCAGTCACGTCTATGAATCTCGTATGCCGTCTTCTGCTTGAAAA	d__Bacteria	0.790615
GAGTGATTAGAAACCCGTGTAGTCCATGACGAGATCGGAAGAGCACACGTCTGACTCCAGTCACACTACGACATCTCGTATGCCGTCTTCTGCTTGAAAA	d__Bacteria	0.863012
GAGTGATTAGAAACCCGTGTAGTCCATGACGAGATCGGAAGAGCACCACGTCTGAACTCCAGTCACCGAGAGTTATCTCGTATGCCGTCTTCTGCTTGAA	d__Bacteria	0.747621
GAGTGATTAGAAACCCGTGTAGTCCATGACGAGATGGAAGAGCACACGTCTGAACTCCAGTCACCGAGCGACATCTCGTATGCCGTCTTCTGCTTGAAAA	d__Bacteria	0.782503
GAGTGATTAGAAACCCTAGTAGTCCATGACGAGACGGAAGAGCACACGTCTGAACTCCAGTCACACTACGACATCTCGTATGCCGTCTTCTGCTTGAAAA	d__Bacteria	0.805709
GAGTGATTAGAAACCCTAGTAGTCCATGACGAGATCCGGAAGAGCACACGTCTGAACTCCAGTCACACGCTACTATCTCGTATGCCGTCTTCTGCTTGAA	d__Bacteria	0.736748
GAGTGATTAGAAACCCTAGTAGTCCATGACGAGATCCGGAAGAGCACACGTCTGAACTCCAGTCACCGAGAGTTATCTCGTATGCCGTCTTCTGCTTGAA	d__Bacteria	0.731021
GAGTGATTAGAAACCCTAGTAGTCCATGACGAGATCGGAAAGCACACGTCTGAACTCCAGTCACCGAGCGACATCTCGTATGCCGTCTTCTGCTTGAAAA	d__Bacteria	0.741532
GAGTGATTAGAAACCCTAGTAGTCCATGACGAGATCGGAAAGCACACGTCTGAACTCCAGTCACTATAGCGAATCTCGTATGCCGTCTTCTGCTTGAAAA	d__Bacteria	0.780722
GAGTGATTAGAAACCCTAGTAGTCCATGACGAGATCGGAAGACACACGTCTGAACTCCAGTCACACTACGACATCTCGTATGCCGTCTTCTGCTTGAAAA	d__Bacteria	0.844074
GAGTGATTAGAAACCCTAGTAGTCCATGACGAGATCGGAAGACACACGTCTGAACTCCAGTCACCGAGCGACATCTCGTATGCCGTCTTCTGCTTGAAAA	d__Bacteria	0.78231
GAGTGATTAGAAACCCTAGTAGTCCATGACGAGATCGGAAGAGCACACGCTGAACTCCAGTCACCGAGAGTTATCTCGTATGCCGTCTTCTGCTTGAAAA	d__Bacteria	0.743332
GAGTGATTAGAAACCCTAGTAGTCCATGACGAGATCGGAAGAGCACACGTCCTGAACTCCAGTCACCGAGAGTTATCTCGTATGCCGTCTTCTGCTTGAA	d__Bacteria	0.733006
GAGTGATTAGAAACCCTAGTAGTCCATGACGAGATCGGAAGAGCACACGTCGAACTCCAGTCACTAGTCTCCATCTCGTATGCCGTCTTCTGCTTGAAAA	d__Bacteria	0.748464
GAGTGATTAGAAACCCTAGTAGTCCATGACGAGATCGGAAGAGCACACGTCTGAACCCAGTCACCGAGAGTTATCTCGTATGCCGTCTTCTGCTTGAAAA	d__Bacteria	0.740725
GAGTGATTAGAAACCCTAGTAGTCCATGACGAGATCGGAAGAGCACACGTCTGAACTCAGTCACCGAGAGTTATCTCGTATGCCGTCTTCTGCTTGAAAA	d__Bacteria	0.73391
GAGTGATTAGAAACCCTAGTAGTCCATGACGAGATCGGAAGAGCACACGTCTGAACTCAGTCACTAGTCTCCATCTCGTATGCCGTCTTCTGCTTGAAAA	d__Bacteria	0.792501
GAGTGATTAGAAACCCTAGTAGTCCATGACGAGATCGGAAGAGCACACGTCTGAATCCAGTCACACTACGACATCTCGTATGCCGTCTTCTGCTTGAAAA	d__Bacteria	0.857133
GAGTGATTAGAAACCCTAGTAGTCCATGACGAGATCGGAAGAGCACCACGTCTGAACTCCAGTCACTATAGCGAATCTCGTATGCCGTCTTCTGCTTGAA	d__Bacteria	0.864253
GAGTGATTAGAAACCCTAGTAGTCCATGACGAGATCGGAAGAGGCACACGTCTGAACTCCAGTCACGACATAGTATCTCGTATGCCGTCTTCTGCTTGAA	d__Bacteria	0.780354
GAGTGATTAGAAACCCTAGTAGTCCATGACGAGATCGGAAGGAGCACACGTCTGAACTCCAGTCACGTCTATGAATCTCGTATGCCGTCTTCTGCTTGAA	d__Bacteria	0.773789
GAGTGATTAGAAACCCTAGTAGTCCATGACGAGATCGGAGAGCACACGTCTGAACTCCAGTCACCGAGCGACATCTCGTATGCCGTCTTCTGCTTGAAAA	d__Bacteria	0.761979
GAGTGATTAGAAACCCTAGTAGTCCATGACGAGATCGGGAAGAGCACACGTCTGAACTCCAGTCACCGAGAGTTATCTCGTATGCCGTCTTCTGCTTGAA	d__Bacteria	0.725262
GAGTGATTAGAAACCCTAGTAGTCCATGACGAGATTCGGAAGAGCACACGTCTGAACTCCAGTCACGTCTATGAATCTCGTATGCCGTCTTCTGCTTGAA	d__Bacteria	0.778044
GAGTGATTAGAAACCCTGGTAGTCCATGACGAATCGGAAGAGCACACGTCTGAACTCCAGTCACACGCTACTATCTCGTATGCCGTCTTCTGCTTGAAAA	d__Bacteria	0.732787
GAGTGATTAGAAACCCTGGTAGTCCATGACGAATCGGAAGAGCACACGTCTGAACTCCAGTCACCGAGAGTTATCTCGTATGCCGTCTTCTGCTTGAAAA	d__Bacteria	0.726411
GAGTGATTAGAAACCCTGGTAGTCCATGACGAATCGGAAGAGCACACGTCTGAACTCCAGTCACGTCTATGAATCTCGTATGCCGTCTTCTGCTTGAAAA	d__Bacteria	0.80976
GAGTGATTAGAAACCCTGGTAGTCCATGACGAGATCCGGAAGAGCACACGTCTGAACTCCAGTCACCGAGAGTTATCTCGTATGCCGTCTTCTGCTTGAA	d__Bacteria	0.72856
GAGTGATTAGAAACCCTGGTAGTCCATGACGAGATCCGGAAGAGCACACGTCTGAACTCCAGTCACGACATAGTATCTCGTATGCCGTCTTCTGCTTGAA	d__Bacteria	0.75086
GAGTGATTAGAAACCCTGGTAGTCCATGACGAGATCCGGAAGAGCACACGTCTGAACTCCAGTCACGTCTATGAATCTCGTATGCCGTCTTCTGCTTGAA	d__Bacteria	0.811721
GAGTGATTAGAAACCCTGGTAGTCCATGACGAGATCCGGAAGAGCACACGTCTGAACTCCAGTCACGTCTGCTAATCTCGTATGCCGTCTTCTGCTTGAA	d__Bacteria	0.754475
GAGTGATTAGAAACCCTGGTAGTCCATGACGAGATCGGAAAGCACACGTCTGAACTCCAGTCACACTACGACATCTCGTATGCCGTCTTCTGCTTGAAAA	d__Bacteria	0.8069
GAGTGATTAGAAACCCTGGTAGTCCATGACGAGATCGGAAAGCACACGTCTGAACTCCAGTCACGTCTATGAATCTCGTATGCCGTCTTCTGCTTGAAAA	d__Bacteria	0.725597
GAGTGATTAGAAACCCTGGTAGTCCATGACGAGATCGGAAGAACACGTCTGAACTCCAGTCACCGAGAGTTATCTCGTATGCCGTCTTCTGCTTGAAAAA	d__Bacteria	0.739704
GAGTGATTAGAAACCCTGGTAGTCCATGACGAGATCGGAAGACACACGTCTGAACTCCAGTCACGACATAGTATCTCGTATGCCGTCTTCTGCTTGAAAA	d__Bacteria	0.706376
GAGTGATTAGAAACCCTGGTAGTCCATGACGAGATCGGAAGACACACGTCTGAACTCCAGTCACGTCTATGAATCTCGTATGCCGTCTTCTGCTTGAAAA	d__Bacteria	0.763727
GAGTGATTAGAAACCCTGGTAGTCCATGACGAGATCGGAAGAGCAACACGTCTGAACTCCAGTCACCGAGAGTTATCTCGTATGCCGTCTTCTGCTTGAA	d__Bacteria	0.740797
GAGTGATTAGAAACCCTGGTAGTCCATGACGAGATCGGAAGAGCAACGTCTGAACTCCAGTCACCGAGAGTTATCTCGTATGCCGTCTTCTGCTTGAAAA	d__Bacteria	0.72374
GAGTGATTAGAAACCCTGGTAGTCCATGACGAGATCGGAAGAGCACACGTCTAACTCCAGTCACCGAGAGTTATCTCGTATGCCGTCTTCTGCTTGAAAA	d__Bacteria	0.731106
GAGTGATTAGAAACCCTGGTAGTCCATGACGAGATCGGAAGAGCACACGTCTGAACCCAGTCACCGAGAGTTATCTCGTATGCCGTCTTCTGCTTGAAAA	d__Bacteria	0.741029
GAGTGATTAGAAACCCTGGTAGTCCATGACGAGATCGGAAGAGCACACGTCTGAACTCAGTCACGTCTATGAATCTCGTATGCCGTCTTCTGCTTGAAAA	d__Bacteria	0.823701
GAGTGATTAGAAACCCTGGTAGTCCATGACGAGATCGGAAGAGCACACGTCTGAACTCCATCACCGAGAGTTATCTCGTATGCCGTCTTCTGCTTGAAAA	d__Bacteria	0.713485
GAGTGATTAGAAACCCTGGTAGTCCATGACGAGATCGGAAGAGCACACGTCTGAACTCCGTCACGTCTATGAATCTCGTATGCCGTCTTCTGCTTGAAAA	d__Bacteria	0.76858
GAGTGATTAGAAACCCTGGTAGTCCATGACGAGATCGGAAGAGCACACGTCTGACTCCAGTCACGACATAGTATCTCGTATGCCGTCTTCTGCTTGAAAA	d__Bacteria	0.731995
GAGTGATTAGAAACCCTGGTAGTCCATGACGAGATCGGAAGAGCACCACGTCTGAACTCCAGTCACCGAGAGTTATCTCGTATGCCGTCTTCTGCTTGAA	d__Bacteria	0.747183
GAGTGATTAGAAACCCTGGTAGTCCATGACGAGATCGGAAGAGCCACACGTCTGAACTCCAGTCACCGAGAGTTATCTCGTATGCCGTCTTCTGCTTGAA	d__Bacteria	0.742474
GAGTGATTAGAAACCCTGGTAGTCCATGACGAGATCGGAAGGCACACGTCTGAACTCCAGTCACTAGTCTCCATCTCGTATGCCGTCTTCTGCTTGAAAA	d__Bacteria	0.731438
GAGTGATTAGAAACCCTGGTAGTCCATGACGAGATCGGAGAGCACACGTCTGAACTCCAGTCACACTACGACATCTCGTATGCCGTCTTCTGCTTGAAAA	d__Bacteria	0.814338
GAGTGATTAGAAACCCTGGTAGTCCATGACGAGATCGGAGAGCACACGTCTGAACTCCAGTCACGTCTATGAATCTCGTATGCCGTCTTCTGCTTGAAAA	d__Bacteria	0.737625
GAGTGATTAGAAACCCTGGTAGTCCATGACGAGATCGGGAAGAGCACACGTCTGAACTCCAGTCACCGAGAGTTATCTCGTATGCCGTCTTCTGCTTGAA	d__Bacteria	0.725099
GAGTGATTAGAAACCCTGGTAGTCCATGACGAGATCGGGAGCACACGTCTGAACTCCAGTCACGTCTATGAATCTCGTATGCCGTCTTCTGCTTGAAAAA	d__Bacteria	0.766788
GAGTGATTAGAAACCCTGGTAGTCCATGACGAGATGGAAGAGCACACGTCTGAACTCCAGTCACGTCTATGAATCTCGTATGCCGTCTTCTGCTTGAAAA	d__Bacteria	0.743668
GAGTGATTAGAAACCCTGGTAGTCCATGACGAGGGAAGAGCACACGTCTGAACTCCAGTCACGTCTATGAATCTCGTATGCCGTCTTCTGCTTGAAAAAA	d__Bacteria	0.746945
GAGTGATTAGAAACCCTGGTAGTCCATGACGAGTCGGAAGAGCACACGTCTGAACTCCAGTCACTAGTCTCCATCTCGTATGCCGTCTTCTGCTTGAAAA	d__Bacteria	0.703725
GAGTGATTAGAAACCCTTGTAGTCCATGACGAATCGGAAGAACACACGTCTGAACTCCAGTCACGACATAGTATCTCGTATGCCGTCTTCTGCTTGAAAA	d__Bacteria	0.800705
GAGTGATTAGAAACCCTTGTAGTCCATGACGAATCGGAAGAAGCACACGTCTGAACTCCAGTCACGACATAGTATCTCGTATGCCGTCTTCTGCTTGAAA	d__Bacteria	0.754319
GAGTGATTAGAAACCCTTGTAGTCCATGACGAATCGGAAGAGCACACGTCTGAACTCCAGTCACACTACGACATCTCGTATGCCGTCTTCTGCTTGAAAA	d__Bacteria	0.884191
GAGTGATTAGAAACCCTTGTAGTCCATGACGAGATCCGGAAGAGCACACGTCTGAACTCCAGTCACACGCTACTATCTCGTATGCCGTCTTCTGCTTGAA	d__Bacteria	0.725492
GAGTGATTAGAAACCCTTGTAGTCCATGACGAGATCCGGAAGAGCACACGTCTGAACTCCAGTCACCGAGAGTTATCTCGTATGCCGTCTTCTGCTTGAA	d__Bacteria	0.716848
GAGTGATTAGAAACCCTTGTAGTCCATGACGAGATCCGGAAGAGCACACGTCTGAACTCCAGTCACGACATAGTATCTCGTATGCCGTCTTCTGCTTGAA	d__Bacteria	0.744386
GAGTGATTAGAAACCCTTGTAGTCCATGACGAGATCCGGAAGAGCACACGTCTGAACTCCAGTCACGTCTATGAATCTCGTATGCCGTCTTCTGCTTGAA	d__Bacteria	0.810633
GAGTGATTAGAAACCCTTGTAGTCCATGACGAGATCGGAAAGCACACGTCTGAACTCCAGTCACCGAGCGACATCTCGTATGCCGTCTTCTGCTTGAAAA	d__Bacteria	0.733423
GAGTGATTAGAAACCCTTGTAGTCCATGACGAGATCGGAAGAGCACACGTCTAACTCCAGTCACCGAGAGTTATCTCGTATGCCGTCTTCTGCTTGAAAA	d__Bacteria	0.71551
GAGTGATTAGAAACCCTTGTAGTCCATGACGAGATCGGAAGAGCACACGTCTAACTCCAGTCACTAGTCTCCATCTCGTATGCCGTCTTCTGCTTGAAAA	d__Bacteria	0.778959
GAGTGATTAGAAACCCTTGTAGTCCATGACGAGATCGGAAGAGCACACGTCTGAACCCAGTCACCGAGCGACATCTCGTATGCCGTCTTCTGCTTGAAAA	d__Bacteria	0.831419
GAGTGATTAGAAACCCTTGTAGTCCATGACGAGATCGGAAGAGCACACGTCTGAACTCAGTCACACTACGACATCTCGTATGCCGTCTTCTGCTTGAAAA	d__Bacteria	0.874941
GAGTGATTAGAAACCCTTGTAGTCCATGACGAGATCGGAAGAGCACACGTCTGAACTCAGTCACCGAGCGACATCTCGTATGCCGTCTTCTGCTTGAAAA	d__Bacteria	0.828169
GAGTGATTAGAAACCCTTGTAGTCCATGACGAGATCGGAAGAGCACACGTCTGAACTCAGTCACGTCTGCTAATCTCGTATGCCGTCTTCTGCTTGAAAA	d__Bacteria	0.769736
GAGTGATTAGAAACCCTTGTAGTCCATGACGAGATCGGAAGAGCACACGTCTGACTCCAGTCACGTCTATGAATCTCGTATGCCGTCTTCTGCTTGAAAA	d__Bacteria	0.784816
GAGTGATTAGAAACCCTTGTAGTCCATGACGAGATCGGAAGAGCCACACGTCTGAACTCCAGTCACCGAGAGTTATCTCGTATGCCGTCTTCTGCTTGAA	d__Bacteria	0.730887
GAGTGATTAGAAACCCTTGTAGTCCATGACGAGATCGGAAGAGCCACACGTCTGAACTCCAGTCACCGAGCGACATCTCGTATGCCGTCTTCTGCTTGAA	d__Bacteria	0.830503
GAGTGATTAGAAACCCTTGTAGTCCATGACGAGATCGGAAGAGGCACACGTCTGAACTCCAGTCACCGAGAGTTATCTCGTATGCCGTCTTCTGCTTGAA	d__Bacteria	0.742626
GAGTGATTAGAAACCCTTGTAGTCCATGACGAGATCGGAGAGCACACGTCTGAACTCCAGTCACGTCTATGAATCTCGTATGCCGTCTTCTGCTTGAAAA	d__Bacteria	0.734681
GAGTGATTAGAAACCCTTGTAGTCCATGACGAGATCGGGAAGAGCACACGTCTGAACTCCAGTCACCGAGAGTTATCTCGTATGCCGTCTTCTGCTTGAA	d__Bacteria	0.711877
GAGTGATTAGAAACCCTTGTAGTCCATGACGAGATGGAAGAGCACACGTCTGAACTCCAGTCACTAGTCTCCATCTCGTATGCCGTCTTCTGCTTGAAAA	d__Bacteria	0.701086
GAGTGATTAGAAACCTGGTAGTCCATGACGAGATCGGAAGGCACACGTCTGAACTCCAGTCACCGAGAGTTATCTCGTATGCCGTCTTCTGCTTGAAAAA	d__Bacteria	0.701877
GAGTGATTAGATACCCCAGTAGTCCATGACGAATCGGAAGAGCACACGTCTGAACTCCAGTCACCGAGCGACATCTCGTATGCCGTCTTCTGCTTGAAAA	d__Bacteria	0.767422
GAGTGATTAGATACCCCAGTAGTCCATGACGAATCGGAAGAGCACACGTCTGAACTCCAGTCACGTCTATGAATCTCGTATGCCGTCTTCTGCTTGAAAA	d__Bacteria	0.736439
GAGTGATTAGATACCCCAGTAGTCCATGACGAGATCCGGAAGAGCACACGTCTGAACTCCAGTCACGTCTATGAATCTCGTATGCCGTCTTCTGCTTGAA	d__Bacteria	0.743299
GAGTGATTAGATACCCCAGTAGTCCATGACGAGATCGGAAAGAGCACACGTCTGAACTCCAGTCACGTCTATGAATCTCGTATGCCGTCTTCTGCTTGAA	d__Bacteria	0.724418
GAGTGATTAGATACCCCAGTAGTCCATGACGAGATCGGAAGAGACACGTCTGAACTCCAGTCACACTACGACATCTCGTATGCCGTCTTCTGCTTGAAAA	d__Bacteria	0.763208
GAGTGATTAGATACCCCAGTAGTCCATGACGAGATCGGAAGAGCACACGCTGAACTCCAGTCACGTCTATGAATCTCGTATGCCGTCTTCTGCTTGAAAA	d__Bacteria	0.741664
GAGTGATTAGATACCCCAGTAGTCCATGACGAGATCGGAAGAGCACACGTCTGAAAAGAGCACACGTCTGAACTCCAGTCACATCTATGAATCTCGTATG	d__Bacteria	0.767769
GAGTGATTAGATACCCCAGTAGTCCATGACGAGATCGGAAGAGCACACGTCTGACTCCAGTCACGTCTATGAATCTCGTATGCCGTCTTCTGCTTGAAAA	d__Bacteria	0.708822
GAGTGATTAGATACCCCGGTAGTCCATGACGAGATCCGGAAGAGCACACGTCTGAACTCCAGTCACGTCTATGAATCTCGTATGCCGTCTTCTGCTTGAA	d__Bacteria	0.793921
GAGTGATTAGATACCCCGGTAGTCCATGACGAGATCCGGAAGAGCACACGTCTGAACTCCAGTCACTGAGTACGATCTCGTATGCCGTCTTCTGCTTGAA	d__Bacteria	0.779116
GAGTGATTAGATACCCCGGTAGTCCATGACGAGATCGGAAAGCACACGTCTGAACTCCAGTCACACTACGACATCTCGTATGCCGTCTTCTGCTTGAAAA	d__Bacteria	0.77588
GAGTGATTAGATACCCCGGTAGTCCATGACGAGATCGGAAGACACACGTCTGAACTCCAGTCACGTCTATGAATCTCGTATGCCGTCTTCTGCTTGAAAA	d__Bacteria	0.741095
GAGTGATTAGATACCCCGGTAGTCCATGACGAGATCGGAAGAGCACACGTCTGAACTCCATCACACGCTACTATCTCGTATGCCGTCTTCTGCTTGAAAA	d__Bacteria	0.709635
GAGTGATTAGATACCCCGGTAGTCCATGACGAGATCGGAAGAGCACACGTCTGAATCCAGTCACGACATAGTATCTCGTATGCCGTCTTCTGCTTGAAAA	d__Bacteria	0.702314
GAGTGATTAGATACCCCGGTAGTCCATGACGAGATCGGAAGAGCACACGTCTGACTCCAGTCACGACATAGTATCTCGTATGCCGTCTTCTGCTTGAAAA	d__Bacteria	0.711994
GAGTGATTAGATACCCCGGTAGTCCATGACGAGATCGGAAGAGCACACGTCTGACTCCAGTCACGTCTATGAATCTCGTATGCCGTCTTCTGCTTGAAAA	d__Bacteria	0.774042
GAGTGATTAGATACCCCGGTAGTCCATGACGAGATCGGAAGAGCACACGTTGAACTCCAGTCACCGAGCGACATCTCGTATGCCGTCTTCTGCTTGAAAA	d__Bacteria	0.796162
GAGTGATTAGATACCCCGGTAGTCCATGACGAGATCGGAAGAGCACCACGTCTGAACTCCAGTCACACTACGACATCTCGTATGCCGTCTTCTGCTTGAA	d__Bacteria	0.868033
GAGTGATTAGATACCCCGGTAGTCCATGACGAGATGGAAGAGCACACGTCTGAACTCCAGTCACTATAGCGAATCTCGTATGCCGTCTTCTGCTTGAAAA	d__Bacteria	0.781991
GAGTGATTAGATACCCCTGTAGTCCATGACGAGACGGAAGAGCACACGTCTGAACTCCAGTCACACTACGACATCTCGTATGCCGTCTTCTGCTTGAAAA	d__Bacteria	0.713048
GAGTGATTAGATACCCCTGTAGTCCATGACGAGATCGGAAGACACACGTCTGAACTCCAGTCACACTACGACATCTCGTATGCCGTCTTCTGCTTGAAAA	d__Bacteria	0.762629
GAGTGATTAGATACCCCTGTAGTCCATGACGAGATCGGAAGAGCACACGTCGAACTCCAGTCACCGAGCGACATCTCGTATGCCGTCTTCTGCTTGAAAA	d__Bacteria	0.714822
GAGTGATTAGATACCCCTGTAGTCCATGACGAGATCGGAAGAGCACACGTCTGAACTCAGTCACCGAGCGACATCTCGTATGCCGTCTTCTGCTTGAAAA	d__Bacteria	0.756118
GAGTGATTAGATACCCCTGTAGTCCATGACGAGATCGGAAGAGCACACGTCTGAACTCAGTCACGTCTATGAATCTCGTATGCCGTCTTCTGCTTGAAAA	d__Bacteria	0.744675
GAGTGATTAGATACCCCTGTAGTCCATGACGAGATCGGAAGAGCACACGTCTGAACTCCATCACGTCTATGAATCTCGTATGCCGTCTTCTGCTTGAAAA	d__Bacteria	0.721932
GAGTGATTAGATACCCCTGTAGTCCATGACGAGATCGGAAGAGCACACGTCTGACTCCAGTCACACTACGACATCTCGTATGCCGTCTTCTGCTTGAAAA	d__Bacteria	0.793239
GAGTGATTAGATACCCCTGTAGTCCATGACGAGATCGGAAGAGCACACGTCTGACTCCAGTCACGTCTATGAATCTCGTATGCCGTCTTCTGCTTGAAAA	d__Bacteria	0.705028
GAGTGATTAGATACCCCTGTAGTCCATGACGAGATCGGAAGAGCACCACGTCTGAACTCCAGTCACGTCTATGAATCTCGTATGCCGTCTTCTGCTTGAA	d__Bacteria	0.742413
GAGTGATTAGATACCCCTGTAGTCCATGACGAGATCGGAAGGCACACGTCTGAACTCCAGTCACTATAGCGAATCTCGTATGCCGTCTTCTGCTTGAAAA	d__Bacteria	0.740943
GAGTGATTAGATACCCCTGTAGTCCATGACGAGATCGGGAAGAGCACACGTCTGAACTCCAGTCACGTCTATGAATCTCGTATGCCGTCTTCTGCTTGAA	d__Bacteria	0.727999
GAGTGATTAGATACCCCTGTAGTCCATGACGAGTCGGAAGAGCACACGTCTGAACTCCAGTCACACTACGACATCTCGTATGCCGTCTTCTGCTTGAAAA	d__Bacteria	0.742369
GAGTGATTAGATACCCGAGTAGTCCATACGAGATTCGGAAGAGCACACGTCTGAACTCCAGTCACACTACGACATCTCGTATGCCGTCTTCTGCTTGAAA	d__Bacteria	0.816829
GAGTGATTAGATACCCGAGTAGTCCATGACGAATCGGAAGAGCACACGTCTGAACTCCAGTCACCGAGAGTTATCTCGTATGCCGTCTTCTGCTTGAAAA	d__Bacteria	0.717902
GAGTGATTAGATACCCGAGTAGTCCATGACGAATCGGAAGAGCACACGTCTGAACTCCAGTCACGGAGAGTTATCTCGTATGCCGTCTTCTGCTTGAAAA	d__Bacteria	0.779485
GAGTGATTAGATACCCGAGTAGTCCATGACGAGACGGAAGAGCACACGTCTGAACTCCAGTCACTATAGCGAATCTCGTATGCCGTCTTCTGCTTGAAAA	d__Bacteria	0.767112
GAGTGATTAGATACCCGAGTAGTCCATGACGAGATCGGAAAGCACACGTCTGAACTCCAGTCACACTACGACATCTCGTATGCCGTCTTCTGCTTGAAAA	d__Bacteria	0.791406
GAGTGATTAGATACCCGAGTAGTCCATGACGAGATCGGAAAGCACACGTCTGAACTCCAGTCACGTCTATGAATCTCGTATGCCGTCTTCTGCTTGAAAA	d__Bacteria	0.703943
GAGTGATTAGATACCCGAGTAGTCCATGACGAGATCGGAAGAGCACACGTCCTGAACTCCAGTCACCGAGAGTTATCTCGTATGCCGTCTTCTGCTTGAA	d__Bacteria	0.718308
GAGTGATTAGATACCCGAGTAGTCCATGACGAGATCGGAAGAGCACACGTCTAACTCCAGTCACCGAGAGTTATCTCGTATGCCGTCTTCTGCTTGAAAA	d__Bacteria	0.719853
GAGTGATTAGATACCCGAGTAGTCCATGACGAGATCGGAAGAGCACACGTCTGAACTCAGTCACCGAGAGTTATCTCGTATGCCGTCTTCTGCTTGAAAA	d__Bacteria	0.719383
GAGTGATTAGATACCCGAGTAGTCCATGACGAGATCGGAAGAGCACACGTCTGAACTCAGTCACGTCTATGAATCTCGTATGCCGTCTTCTGCTTGAAAA	d__Bacteria	0.814625
GAGTGATTAGATACCCGAGTAGTCCATGACGAGATCGGAAGAGCACACGTCTGAACTCCATCACGACATAGTATCTCGTATGCCGTCTTCTGCTTGAAAA	d__Bacteria	0.758126
GAGTGATTAGATACCCGAGTAGTCCATGACGAGATCGGAAGAGCACACGTCTGACTCCAGTCACCGAGCGACATCTCGTATGCCGTCTTCTGCTTGAAAA	d__Bacteria	0.801328
GAGTGATTAGATACCCGAGTAGTCCATGACGAGATCGGAAGAGCACACGTCTGACTCCAGTCACGACATAGTATCTCGTATGCCGTCTTCTGCTTGAAAA	d__Bacteria	0.727461
GAGTGATTAGATACCCGAGTAGTCCATGACGAGATCGGAGAGCACACGTCTGAACTCCAGTCACGTCTATGAATCTCGTATGCCGTCTTCTGCTTGAAAA	d__Bacteria	0.728817
GAGTGATTAGATACCCGAGTAGTCCATGACGAGATCGGGAAGAGCACACGTCTGAACTCCAGTCACGTCTATGAATCTCGTATGCCGTCTTCTGCTTGAA	d__Bacteria	0.794831
GAGTGATTAGATACCCGAGTAGTCCATGACGAGGTCGGAAGAGCACCACGTCTGAACTCCAGTCACACTACGACATCTCGTATGCCGTCTTCTGCTTGAA	d__Bacteria	0.832482
GAGTGATTAGATACCCGGGTAGTCCATGACGAATCGGAAGAGCACACGTCTGAACTCCAGTCACCGAGAGTTATCTCGTATGCCGTCTTCTGCTTGAAAA	d__Bacteria	0.714102
GAGTGATTAGATACCCGGGTAGTCCATGACGAGAGGAAGAGCACACGTCTGAACTCCAGTCACACTACGACATCTCGTATGCCGTCTTCTGCTTGAAAAA	d__Bacteria	0.828594
GAGTGATTAGATACCCGGGTAGTCCATGACGAGATCCGGAAGAGCACACGTCTGAACTCCAGTCACACTACGACATCTCGTATGCCGTCTTCTGCTTGAA	d__Bacteria	0.859075
GAGTGATTAGATACCCGGGTAGTCCATGACGAGATCCGGAAGAGCACACGTCTGAACTCCAGTCACGACATAGTATCTCGTATGCCGTCTTCTGCTTGAA	d__Bacteria	0.741851
GAGTGATTAGATACCCGGGTAGTCCATGACGAGATCGGAAGACACACGTCTGAACTCCAGTCACCGAGCGACATCTCGTATGCCGTCTTCTGCTTGAAAA	d__Bacteria	0.767241
GAGTGATTAGATACCCGGGTAGTCCATGACGAGATCGGAAGAGCACACGTCTAACTCCAGTCACCGAGAGTTATCTCGTATGCCGTCTTCTGCTTGAAAA	d__Bacteria	0.723747
GAGTGATTAGATACCCGGGTAGTCCATGACGAGATCGGAAGAGCACACGTCTGAACTCAGTCACCGAGAGTTATCTCGTATGCCGTCTTCTGCTTGAAAA	d__Bacteria	0.723374
GAGTGATTAGATACCCGGGTAGTCCATGACGAGATCGGAAGAGCACACGTCTGAACTCCCAGTCACCGAGAGTTATCTCGTATGCCGTCTTCTGCTTGAA	d__Bacteria	0.747389
GAGTGATTAGATACCCGGGTAGTCCATGACGAGATCGGAAGAGCACACGTCTGACTCCAGTCACGACATAGTATCTCGTATGCCGTCTTCTGCTTGAAAA	d__Bacteria	0.725146
GAGTGATTAGATACCCGGGTAGTCCATGACGAGATCGGAAGAGCACAGTCTGAACTCCAGTCACGACATAGTATCTCGTATGCCGTCTTCTGCTTGAAAA	d__Bacteria	0.745335
GAGTGATTAGATACCCGGGTAGTCCATGACGAGATCGGAGAGCACACGTCTGAACTCCAGTCACACTACGACATCTCGTATGCCGTCTTCTGCTTGAAAA	d__Bacteria	0.809068
GAGTGATTAGATACCCGGGTAGTCCATGACGAGGGAAGAGCACACGTCTGAACTCCAGTCACGTCTATGAATCTCGTATGCCGTCTTCTGCTTGAAAAAA	d__Bacteria	0.739663
GAGTGATTAGATACCCGTGTAGTCCATGACGAGAGGAAGAGCACACGTCTGAACTCCAGTCACTATAGCGAATCTCGTATGCCGTCTTCTGCTTGAAAAA	d__Bacteria	0.797902
GAGTGATTAGATACCCGTGTAGTCCATGACGAGATCCGGAAGAGCACACGTCTGAACTCCAGTCACCGAGAGTTATCTCGTATGCCGTCTTCTGCTTGAA	d__Bacteria	0.70276
GAGTGATTAGATACCCGTGTAGTCCATGACGAGATCGGAAAGAGCACACGTCTGAACTCCAGTCACGTCTATGAATCTCGTATGCCGTCTTCTGCTTGAA	d__Bacteria	0.784314
GAGTGATTAGATACCCGTGTAGTCCATGACGAGATCGGAAAGCACACGTCTGAACTCCAGTCACTATAGCGAATCTCGTATGCCGTCTTCTGCTTGAAAA	d__Bacteria	0.761178
GAGTGATTAGATACCCGTGTAGTCCATGACGAGATCGGAAGAGCACACGTCTGAACCCAGTCACGACATAGTATCTCGTATGCCGTCTTCTGCTTGAAAA	d__Bacteria	0.745356
GAGTGATTAGATACCCGTGTAGTCCATGACGAGATCGGAAGAGCACACGTCTGACTCCAGTCACGACATAGTATCTCGTATGCCGTCTTCTGCTTGAAAA	d__Bacteria	0.705352
GAGTGATTAGATACCCGTGTAGTCCATGACGAGATCGGAAGAGCACACGTCTGACTCCAGTCACGTCTATGAATCTCGTATGCCGTCTTCTGCTTGAAAA	d__Bacteria	0.769227
GAGTGATTAGATACCCGTGTAGTCCATGACGAGATCGGAAGAGCCACACGTCTGAACTCCAGTCACCGAGAGTTATCTCGTATGCCGTCTTCTGCTTGAA	d__Bacteria	0.710735
GAGTGATTAGATACCCGTGTAGTCCATGACGAGATCGGAGAGCACACGTCTGAACTCCAGTCACTATAGCGAATCTCGTATGCCGTCTTCTGCTTGAAAA	d__Bacteria	0.779344
GAGTGATTAGATACCCTAGTAGTCCATGACGAATCGGAAGAGCACACGTCTGAACTCCAGTCACGACATAGTATATCGTATGCCGTCTTCTGCTTGAAAA	d__Bacteria	0.761505
GAGTGATTAGATACCCTAGTAGTCCATGACGAATCGGAAGAGCACACGTCTGAACTCCAGTCACGACATAGTATCTCGTATGCCGTCTTCTGCTTGAAAA	d__Bacteria	0.741698
GAGTGATTAGATACCCTAGTAGTCCATGACGAGAGGAAGAGCACACGTCTGAACTCCAGTCACCTGCGTAGATCTCGTATGCCGTCTTCTGCTTGAAAAA	d__Bacteria	0.819574
GAGTGATTAGATACCCTAGTAGTCCATGACGAGATCCGGAAGAGCACACGTCTGAACTCCAGTCACGACATAGTATCTCGTATGCCGTCTTCTGCTTGAA	d__Bacteria	0.719959
GAGTGATTAGATACCCTAGTAGTCCATGACGAGATCCGGAAGAGCACACGTCTGAACTCCAGTCACGTCTATGAATCTCGTATGCCGTCTTCTGCTTGAA	d__Bacteria	0.788281
GAGTGATTAGATACCCTAGTAGTCCATGACGAGATCCGGAAGAGCACACGTCTGAACTCCAGTCACGTCTGCTAATCTCGTATGCCGTCTTCTGCTTGAA	d__Bacteria	0.720538
GAGTGATTAGATACCCTAGTAGTCCATGACGAGATCGGAAAGCACACGTCTGAACTCCAGTCACACTACGACATCTCGTATGCCGTCTTCTGCTTGAAAA	d__Bacteria	0.769549
GAGTGATTAGATACCCTAGTAGTCCATGACGAGATCGGAAAGCACACGTCTGAACTCCAGTCACCGAGCGACATCTCGTATGCCGTCTTCTGCTTGAAAA	d__Bacteria	0.70067
GAGTGATTAGATACCCTAGTAGTCCATGACGAGATCGGAAAGCACACGTCTGAACTCCAGTCACTATAGCGAATCTCGTATGCCGTCTTCTGCTTGAAAA	d__Bacteria	0.745211
GAGTGATTAGATACCCTAGTAGTCCATGACGAGATCGGAAGACACACGTCTGAACTCCAGTCACCGAGCGACATCTCGTATGCCGTCTTCTGCTTGAAAA	d__Bacteria	0.747466
GAGTGATTAGATACCCTAGTAGTCCATGACGAGATCGGAAGACACACGTCTGAACTCCAGTCACGTCTATGAATCTCGTATGCCGTCTTCTGCTTGAAAA	d__Bacteria	0.732125
GAGTGATTAGATACCCTAGTAGTCCATGACGAGATCGGAAGAGCACACGTCTAACTCCAGTCACGACATAGTATCTCGTATGCCGTCTTCTGCTTGAAAA	d__Bacteria	0.734664
GAGTGATTAGATACCCTAGTAGTCCATGACGAGATCGGAAGAGCACACGTCTGAACCCAGTCACCGAGAGTTATCTCGTATGCCGTCTTCTGCTTGAAAA	d__Bacteria	0.702073
GAGTGATTAGATACCCTAGTAGTCCATGACGAGATCGGAAGAGCACACGTCTGAACCCAGTCACGTCTGCTAATCTCGTATGCCGTCTTCTGCTTGAAAA	d__Bacteria	0.724059
GAGTGATTAGATACCCTAGTAGTCCATGACGAGATCGGAAGAGCACACGTCTGACTCCAGTCACGACATAGTATCTCGTATGCCGTCTTCTGCTTGAAAA	d__Bacteria	0.701146
GAGTGATTAGATACCCTAGTAGTCCATGACGAGATCGGAAGAGCACACGTCTGACTCCAGTCACGTCTATGAATCTCGTATGCCGTCTTCTGCTTGAAAA	d__Bacteria	0.763579
GAGTGATTAGATACCCTAGTAGTCCATGACGAGATCGGGAGCACACGTCTGAACTCCAGTCACGTCTATGAATCTCGTATGCCGTCTTCTGCTTGAAAAA	d__Bacteria	0.734514
GAGTGATTAGATACCCTAGTAGTCCATGACGAGATGGAAGAGCACACGTCTGAACTCCAGTCACCGAGCGACATCTCGTATGCCGTCTTCTGCTTGAAAA	d__Bacteria	0.744676
GAGTGATTAGATACCCTAGTAGTCCATGACGATATCGGAAGAGCACACGTCTGAACCCAGTCACGTCTATGAATCTCGTATGCCGTCTTCTGCTTGAAAA	d__Bacteria	0.761945
GAGTGATTAGATACCCTGGTAGTCCATGACGAATCGGAAGAGCACACGTCTGAACTCCAGTCACGACATAGTATCTCGTATGCCGTCTTCTGCTTGAAAA	d__Bacteria	0.729628
GAGTGATTAGATACCCTGGTAGTCCATGACGAATCGGAAGAGCACACGTCTGAACTCCAGTCACGTCTATGAATCTCGTATGCCGTCTTCTGCTTGAAAA	d__Bacteria	0.761725
GAGTGATTAGATACCCTGGTAGTCCATGACGAGACGGAAGAGCACACGTCTGAACTCCAGTCACTATAGCGAATCTCGTATGCCGTCTTCTGCTTGAAAA	d__Bacteria	0.723427
GAGTGATTAGATACCCTGGTAGTCCATGACGAGATCGGAAAGCACACGTCTGAACTCCAGTCACACTACGACATCTCGTATGCCGTCTTCTGCTTGAAAA	d__Bacteria	0.761995
GAGTGATTAGATACCCTGGTAGTCCATGACGAGATCGGAAGAGCACACGTCTGAACTCAGTCACGTCTATGAATCTCGTATGCCGTCTTCTGCTTGAAAA	d__Bacteria	0.779677
GAGTGATTAGATACCCTGGTAGTCCATGACGAGATCGGAAGAGCACACGTCTGAACTCCATCACGACATAGTATCTCGTATGCCGTCTTCTGCTTGAAAA	d__Bacteria	0.729936
GAGTGATTAGATACCCTGGTAGTCCATGACGAGATCGGAAGAGCACACGTCTGAATCCAGTCACTAGTCTCCATCTCGTATGCCGTCTTCTGCTTGAAAA	d__Bacteria	0.702721
GAGTGATTAGATACCCTGGTAGTCCATGACGAGATCGGAAGAGCACACGTCTGACTCCAGTCACGTCTATGAATCTCGTATGCCGTCTTCTGCTTGAAAA	d__Bacteria	0.746006
GAGTGATTAGATACCCTGGTAGTCCATGACGAGATCGGAAGAGCACCACGTCTGAACTCCAGTCACGACATAGTATCTCGTATGCCGTCTTCTGCTTGAA	d__Bacteria	0.748075
GAGTGATTAGATACCCTGGTAGTCCATGACGAGATCGGAAGGAAGAGCACACGTCTGAACTCCAGTCACCGAGAGTTATCTCGTATGCCGTCTTCTGCTT	d__Bacteria	0.765875
GAGTGATTAGATACCCTGGTAGTCCATGACGAGATCGGAAGGCACACGTCTGAACTCCAGTCACACTACGACATATCGTATGCCGTCTTCTGCTTGAAAA	d__Bacteria	0.799584
GAGTGATTAGATACCCTGGTAGTCCATGACGAGATCGGAAGGCACACGTCTGAACTCCAGTCACCGAGCGACATCTCGTATGCCGTCTTCTGCTTGAAAA	d__Bacteria	0.760956
GAGTGATTAGATACCCTGGTAGTCCATGACGAGATCGGGAAGAGCACACGTCTGAACTCCAGTCACGACATAGTATCTCGTATGCCGTCTTCTGCTTGAA	d__Bacteria	0.712404
GAGTGATTAGATACCCTTGTAGTCCATGACGAGACGGAAGAGCACACGTCTGAACTCCAGTCACGTCTATGAATCTCGTATGCCGTCTTCTGCTTGAAAA	d__Bacteria	0.732149
GAGTGATTAGATACCCTTGTAGTCCATGACGAGAGGAAGAGCACACGTCTGAACTCCAGTCACTAGTCTCCATCTCGTATGCCGTCTTCTGCTTGAAAAA	d__Bacteria	0.73347
GAGTGATTAGATACCCTTGTAGTCCATGACGAGATCCGGAAGAGCACACGTCTGAACTCCAGTCACCGAGAGTTATCTCGTATGCCGTCTTCTGCTTGAA	d__Bacteria	0.737053
GAGTGATTAGATACCCTTGTAGTCCATGACGAGATCCGGAAGAGCACACGTCTGAACTCCAGTCACGTCTATGAATCTCGTATGCCGTCTTCTGCTTGAA	d__Bacteria	0.823459
GAGTGATTAGATACCCTTGTAGTCCATGACGAGATCGCACACGTCTGAACTCCAGTCACACTACGACATCTCGTATGCCGTCTTCTGCTTGAAAAAAAAA	d__Bacteria	0.717822
GAGTGATTAGATACCCTTGTAGTCCATGACGAGATCGGAAAGCACACGTCTGAACTCCAGTCACACTACGACATCTCGTATGCCGTCTTCTGCTTGAAAA	d__Bacteria	0.801864
GAGTGATTAGATACCCTTGTAGTCCATGACGAGATCGGAAAGCACACGTCTGAACTCCAGTCACGTCTATGAATCTCGTATGCCGTCTTCTGCTTGAAAA	d__Bacteria	0.720121
GAGTGATTAGATACCCTTGTAGTCCATGACGAGATCGGAAGACACACGTCTGAACTCCAGTCACACTACGACATCTCGTATGCCGTCTTCTGCTTGAAAA	d__Bacteria	0.845184
GAGTGATTAGATACCCTTGTAGTCCATGACGAGATCGGAAGACACACGTCTGAACTCCAGTCACTAGTCTCCATCTCGTATGCCGTCTTCTGCTTGAAAA	d__Bacteria	0.730389
GAGTGATTAGATACCCTTGTAGTCCATGACGAGATCGGAAGAGCACACGTCTAACTCCAGTCACCGAGAGTTATCTCGTATGCCGTCTTCTGCTTGAAAA	d__Bacteria	0.73962
GAGTGATTAGATACCCTTGTAGTCCATGACGAGATCGGAAGAGCACACGTCTGAACCCAGTCACCGAGAGTTATCTCGTATGCCGTCTTCTGCTTGAAAA	d__Bacteria	0.747309
GAGTGATTAGATACCCTTGTAGTCCATGACGAGATCGGAAGAGCACACGTCTGAACCTCCAGTCACACGCTACTATCTCGTATGCCGTCTTCTGCTTGAA	d__Bacteria	0.76491
GAGTGATTAGATACCCTTGTAGTCCATGACGAGATCGGAAGAGCACACGTCTGAACTCAGTCACCGAGAGTTATCTCGTATGCCGTCTTCTGCTTGAAAA	d__Bacteria	0.740035
GAGTGATTAGATACCCTTGTAGTCCATGACGAGATCGGAAGAGCACACGTCTGAACTCAGTCACGTCTATGAATCTCGTATGCCGTCTTCTGCTTGAAAA	d__Bacteria	0.834897
GAGTGATTAGATACCCTTGTAGTCCATGACGAGATCGGAAGAGCACACGTCTGAATCCAGTCACGACATAGTATCTCGTATGCCGTCTTCTGCTTGAAAA	d__Bacteria	0.737848
GAGTGATTAGATACCCTTGTAGTCCATGACGAGATCGGAAGAGCACACGTCTGACTCCAGTCACACGCTACTATCTCGTATGCCGTCTTCTGCTTGAAAA	d__Bacteria	0.71542
GAGTGATTAGATACCCTTGTAGTCCATGACGAGATCGGAAGAGCACACGTCTGACTCCAGTCACACTACGACATCTCGTATGCCGTCTTCTGCTTGAAAA	d__Bacteria	0.868131
GAGTGATTAGATACCCTTGTAGTCCATGACGAGATCGGAAGAGCACACGTCTGACTCCAGTCACGACATAGTATCTCGTATGCCGTCTTCTGCTTGAAAA	d__Bacteria	0.747057
GAGTGATTAGATACCCTTGTAGTCCATGACGAGATCGGAAGAGCACACGTCTGACTCCAGTCACGTCTATGAATCTCGTATGCCGTCTTCTGCTTGAAAA	d__Bacteria	0.804204
GAGTGATTAGATACCCTTGTAGTCCATGACGAGATCGGAAGAGCACACGTCTGACTCCAGTCACTAGTCTCCATCTCGTATGCCGTCTTCTGCTTGAAAA	d__Bacteria	0.767704
GAGTGATTAGATACCCTTGTAGTCCATGACGAGATCGGAAGAGCACACGTCTGACTCCAGTCACTATAGCGAATCTCGTATGCCGTCTTCTGCTTGAAAA	d__Bacteria	0.846652
GAGTGATTAGATACCCTTGTAGTCCATGACGAGATCGGAAGAGCACACGTTCTGAACTCCAGTCACCGAGAGTTATCTCGTATGCCGTCTTCTGCTTGAA	d__Bacteria	0.714913
GAGTGATTAGATACCCTTGTAGTCCATGACGAGATCGGAGAGCACACGTCTGAACTCCAGTCACTAGTCTCCATCTCGTATGCCGTCTTCTGCTTGAAAA	d__Bacteria	0.704876
GAGTGATTAGATACCCTTGTAGTCCATGACGAGATCGGGAAGAGCACACGTCTGAACTCCAGTCACCGAGAGTTATCTCGTATGCCGTCTTCTGCTTGAA	d__Bacteria	0.728883
GAGTGATTAGATACCCTTGTAGTCCATGACGAGATCGGGAAGAGCACACGTCTGAACTCCAGTCACGTCTATGAATCTCGTATGCCGTCTTCTGCTTGAA	d__Bacteria	0.815033
GAGTGATTAGATACCCTTGTAGTCCATGACGAGATGGAAGAGCACACGTCTGAACTCCAGTCACACTACGACATCTCGTATGCCGTCTTCTGCTTGAAAA	d__Bacteria	0.833097
GAGTGATTAGATACCCTTGTAGTCCATGACGAGATTCGGAAGAGCACACGTCTGAACTCCAGTCACCGAGCGACATCTCGTATGCCGTCTTCTGCTTGAA	d__Bacteria	0.796393
GAGTGCAGTAGTCATTAGAAACCCCAGTAGTCCATGACGAGATTCGGAAGAGCACACGTCTGAACTCCAGTCACGACATAGTATCTCGTATGCCGTCTTC	d__Bacteria	0.843981
GAGTGCAGTAGTCATTAGAAACCCGAGTAGTCCATGACGAGATCGGAAAGCACACGTCTGAACTCCAGTCACGACATAGTATCTCGTATGCCGTCTTCTG	d__Bacteria	0.870695
GAGTGCAGTAGTCATTAGAAACCCGGGTAGTCCATGACGAGATCGGAAAGCACACGTCTGAACTCCAGTCACGACATAGTATCTCGTATGCCGTCTTCTG	d__Bacteria	0.866414
GAGTGCAGTAGTCATTAGAAACCCGGGTAGTCCATGACGAGATCGGAAGAGCACACGTCTGACTCCAGTCACGACATAGTATCTCGTATGCCGTCTTCTG	d__Bacteria	0.898538
GAGTGCAGTAGTCATTAGAAACCCGGGTAGTCCATGACGGGGTCGGAAGAGCACACGTCTGAACTCCAGTCACGACATAGTATCTCGTATGCCGTCTTCT	d__Bacteria	0.855864
GAGTGCAGTAGTCATTAGAAACCCTAGTAGTCCATGACGAGATCGGAAAGCACACGTCTGAACTCCAGTCACGACATAGTATCTCGTATGCCGTCTTCTG	d__Bacteria	0.862778
GAGTGCAGTAGTCATTAGAAACCCTAGTAGTCCATGACGGGGTCGGAAGAGCACACGTCTGAACTCCAGTCACGACATAGTATCTCGTATGCCGTCTTCT	d__Bacteria	0.848471
GAGTGCAGTAGTCATTAGAAACCCTTGTAGTCCATGACGAGATGGAAGAGCACACGTCTGAACTCCAGTCACAACATAGTATCTCGTATGCCGTCTTCTG	d__Bacteria	0.858605
GAGTGCAGTAGTCATTAGATACCCCTGTAGTCCATGACGAGATAGAGCACACGTCTGAACTCCAGTCACGACATAGTATCTCGTATGCCGTCTTCTGCTT	d__Bacteria	0.724817
GAGTGCATTAGAAACCCCAGTAGTCCATGACGAGATCGGAAAGCACACGTCTGAACTCCAGTCACCGAGAGTTATCTCGTATGCCGTCTTCTGCTTGAAA	d__Bacteria	0.706601
GAGTGCATTAGAAACCCCAGTAGTCCATGACGAGATCGGAAGAGCACACGTCTGACTCCAGTCACCGAGAGTTATCTCGTATGCCGTCTTCTGCTTGAAA	d__Bacteria	0.784933
GAGTGCATTAGAAACCCCGGTAGTCCATGACGAGATCGGAAAGCACACGTCTGAACTCCAGTCACCGAGAGTTATCTCGTATGCCGTCTTCTGCTTGAAA	d__Bacteria	0.766288
GAGTGCATTAGAAACCCCTGTAGTCCATGACGAGATCGGAAGGCACACGTCTGAACTCCAGTCACCGAGAGTTATCTCGTATGCCGTCTTCTGCTTGAAA	d__Bacteria	0.743294
GAGTGCATTAGAAACCCGTGTAGTCCATGACGAGATCGGAAGACACACGTCTGAACTCCAGTCACCGAGAGTTATCTCGTATGCCGTCTTCTGCTTGAAA	d__Bacteria	0.80213
GAGTGCATTAGAAACCCGTGTAGTCCATGACGAGATCGGAGAGCACACGTCTGAACTCCAGTCACCGAGAGTTATCTCGTATGCCGTCTTCTGCTTGAAA	d__Bacteria	0.778468
GAGTGCATTAGAAACCCGTGTAGTCCATGACGAGGTCGGAAGGCACACGTCTGAACTCCAGTCACCGAGAGTTATCTCGTATGCCGTCTTCTGCTTGAAA	d__Bacteria	0.746041
GAGTGCATTAGAAACCCTAGTAGTCCATGACGAGATCCGGAAGAGCACACGTCTGAACTCCAGTCACCGAGAGTTATCTCGTATGCCGTCTTCTGCTTGA	d__Bacteria	0.827557
GAGTGCATTAGAAACCCTGGTAGTCCATGACGAGATCGGAAGACACACGTCTGAACTCCAGTCACCGAGAGTTATCTCGTATGCCGTCTTCTGCTTGAAA	d__Bacteria	0.805847
GAGTGCATTAGAAACCCTTGTAGTCCATGACGAGATCGGAGAGCACACGTCTGAACTCCAGTCACCGAGAGTTATCTCGTATGCCGTCTTCTGCTTGAAA	d__Bacteria	0.766911
GAGTGCATTAGATACCCGAGTAGTCCATGACGAGATCGGAAAGCACACGTCTGAACTCCAGTCACCGAGAGTTATCTCGTATGCCGTCTTCTGCTTGAAA	d__Bacteria	0.746548
GAGTGCATTAGATACCCGAGTAGTCCATGACGAGATCGGAAGAGCCACGTCTGAACTCCAGTCACCGAGAGTTATCTCGTATGCCGTCTTCTGCTTGAAA	d__Bacteria	0.805022
GAGTGCATTAGATACCCGGGTAGTCCATGACGAGATCGGAGAGCACACGTCTGAACTCCAGTCACCGAGAGTTATCTCGTATGCCGTCTTCTGCTTGAAA	d__Bacteria	0.768192
GAGTGCATTAGATACCCGTGTAGTCCATGACGAGATCGGAAGAGCACACGTCTAACTCCAGTCACCGAGAGTTATCTCGTATGCCGTCTTCTGCTTGAAA	d__Bacteria	0.826733
GAGTGCATTAGATACCCGTGTAGTCCATGACGAGATCGGAGAGCACACGTCTGAACTCCAGTCACCGAGAGTTATCTCGTATGCCGTCTTCTGCTTGAAA	d__Bacteria	0.753638
GAGTGCATTAGATACCCTTGTAGTCCATGACGAGATCGGAAGAGCACACGTCTGACTCCAGTCACGACATAGTATCTCGTATGCCGTCTTCTGCTTGAAA	d__Bacteria	0.859217
GAGTGCATTAGATACCCTTGTAGTCCATGACGAGTCGGAAGAGCACACGTCTGAACTCCAGTCACCGAGAGTTATCTCGTATGCCGTCTTCTGCTTGAAA	d__Bacteria	0.792867
GAGTGCCGCCAACGACGCTTCCGCCGAGCTGGTGGGTTATGTGACCCGCATGATGGACGAGAGCAATGTCGCATGGCAGATCGGTGAGCTGGGCCGTCTG	d__Bacteria	0.778544
GAGTGGGAAAGAGTGATTAGAAACCCGAGTAGTCCATGACGAGATGGAAGAGCACACGTCTGAACTCCAGTCACCGAGAGTTATCTCGTATGCCGTCTTC	d__Bacteria	0.717251
GAGTGGGAAAGAGTGATTAGAAACCCTTGTAGTCCATGACGAGATCCGGAAGAGCACCACGTCTGAACTCCAGTCACCGAGAGTTATCTCGTATGCCGTC	d__Bacteria	0.761721
GAGTGGGAAAGAGTGATTAGAAACCCTTGTAGTCCATGACGAGATCGGAAGAGCACACGTCTAACTCCAGTCACCGAGAGTTATCTCGTATGCCGTCTTC	d__Bacteria	0.777869
GAGTGGGGAAAGAGTGATTAGAAACCCCAGTAGTCCATGACGAGATGGAAGAGCACACGTCTGAACTCCAGTCACCGAGAGTTATCTCGTATGCCGTCTT	d__Bacteria	0.701962
GAGTGGGGAAAGAGTGATTAGAAACCCCGGTAGTCCATGACGAGATCGGAGAGCACACGTCTGAACTCCAGTCACCGAGAGTTATCTCGTATGCCGTCTT	d__Bacteria	0.770329
GAGTGGGGAAAGAGTGATTAGAAACCCCGGTAGTCCATGACGTCGGAAGAGCACACGTCTGAACTCCAGTCACGACATAGTATCTCGTATGCCGTCTTCT	d__Bacteria	0.813883
GAGTGGGGAAAGAGTGATTAGAAACCCCTGTAGTCCATGACGAATCGGAAGAGCACACGTCTGAACTCCAGTCACGACATAGTATCTCGTATGCCGTCTT	d__Bacteria	0.818632
GAGTGGGGAAAGAGTGATTAGAAACCCCTGTAGTCCATGACGAGATCGGAAGCACACGTCTGAACTCCAGTCACGACATAGTATCTCGTATGCCGTCTTC	d__Bacteria	0.747207
GAGTGGGGAAAGAGTGATTAGAAACCCGAGTAGTCCATGACAAGATCGGAAGGAGCACACGTCTGAACTCCAGTCACCGAGAGTTATCTCGTATGCCGTC	d__Bacteria	0.764933
GAGTGGGGAAAGAGTGATTAGAAACCCGAGTAGTCCATGACGAGATCGGAGAGCACACGTCTGAACTCCAGTCACCGAGAGTTATCTCGTATGCCGTCTT	d__Bacteria	0.76094
GAGTGGGGAAAGAGTGATTAGAAACCCTAGTAGTCCATGACGAATCGGAAGAGCACACGTCTGAACTCCAGTCACGACATAGTATCTCGTATGCCGTCTT	d__Bacteria	0.871453
GAGTGGGGAAAGAGTGATTAGAAACCCTAGTAGTCCATGACGAGATCGGAAAGCACACGTCTGAACTCCAGTCACGACATAGTATCTCGTATGCCGTCTT	d__Bacteria	0.791745
GAGTGGGGAAAGAGTGATTAGAAACCCTAGTAGTCCATGACGAGATCGGAAGAGCACACGTCTGACTCCAGTCACGACATAGTATCTCGTATGCCGTCTT	d__Bacteria	0.842204
GAGTGGGGAAAGAGTGATTAGAAACCCTAGTAGTCCATGACGAGATCGGAGAGCACACGTCTGAACTCCAGTCACGACATAGTATCTCGTATGCCGTCTT	d__Bacteria	0.786998
GAGTGGGGAAAGAGTGATTAGAAACCCTTGTAGTCCATGACGAGATCGGAAGACACACGTCTGAACTCCAGTCACGACATAGTATCTCGTATGCCGTCTT	d__Bacteria	0.82435
GAGTGGGGAAAGAGTGATTAGAAACCCTTGTAGTCCATGACGAGATCGGAAGAGCACACGTCTGACTCCAGTCACGACATAGTATCTCGTATGCCGTCTT	d__Bacteria	0.834353
GAGTGGGGAAAGAGTGATTAGATACCCCAGTAGTCCATGACGAGTCGGAAGAGCACACGTCTGAACTCCAGTCACGACATAGTATCTCGTATGCCGTCTT	d__Bacteria	0.710462
GAGTGGGGAAAGAGTGATTAGATACCCCTGTAGTCCATGACGAGATCCGGAAGAGCACACGTCTGAACTCCAGTCACGACATAGTATCTCGTATGCCGTC	d__Bacteria	0.739257
GAGTGGGGAAAGAGTGATTAGATACCCGAGTAGTCCATGACGAGATCGGAAAGCACACGTCTGAACTCCAGTCACGACATAGTATCTCGTATGCCGTCTT	d__Bacteria	0.773338
GAGTGGGGAAAGAGTGATTAGATACCCGTGTAGTCCATGACGAGATCGGAAAGCACACGTCTGAACTCCAGTCACCGAGAGTTATCTCGTATGCCGTCTT	d__Bacteria	0.706379
GAGTGGGGAAAGAGTGATTAGATACCCGTGTAGTCCATGACGAGTCGGAAGAGCACACGTCTGAACTCCAGTCACGACATAGTATCTCGTATGCCGTCTT	d__Bacteria	0.769384
GAGTGGGGAAAGAGTGATTAGATACCCTGGTAGTCCATGACGAGATCGGAGAGCACACGTCTGAACTCCAGTCACGACATAGTATCTCGTATGCCGTCTT	d__Bacteria	0.749585
GAGTGGGGAAAGAGTGATTAGATACCCTTGTAGTCCATGACGAGATCGGAAAGCACACGTCTGAACTCCAGTCACGACATAGTATCTCGTATGCCGTCTT	d__Bacteria	0.781795
GAGTGGGGAAAGAGTGATTAGATACCCTTGTAGTCCATGACGAGATCGGAGAGCACACGTCTGAACTCCAGTCACGACATAGTATCTCGTATGCCGTCTT	d__Bacteria	0.788242
GAGTGTTAGAAACATTAGAAACCCCGGTAGTCCATGACGAGATCGGAAGAGCACACGTCCTGAACTCCAGTCACGACATAGTATCTCGTATGCCGTCTTC	d__Bacteria	0.8141
GAGTGTTAGAAACATTAGAAACCCGAGTAGTCCATGACGAGATCGGAAGAGCACACGTCTGACTCCAGTCACGACATAGTATCTCGTATGCCGTCTTCTG	d__Bacteria	0.803269
GAGTGTTAGAAACATTAGAAACCCTAGTAGTCCATGACGAGTCGGAAGAGCACACGTCTGAACTCCAGTCACGACATAGTATCTCGTATGCCGTCTTCTG	d__Bacteria	0.745021
GAGTGTTAGAAACATTAGAAACCCTGGTAGTCCATGACGAGATCCGGAAGAGCACACGTCTGAACTCCAGTCACGACATAGTATCTCGTATGCCGTCTTC	d__Bacteria	0.798669
GAGTGTTAGAAACATTAGAAACCCTGGTAGTCCATGACGAGATCGGAAGAGCACACGTCCTGAACTCCAGTCACGACATAGTATCTCGTATGCCGTCTTC	d__Bacteria	0.804694
GAGTGTTAGAAACATTAGAAACCCTTGTAGTCCATGACGAGATCGGAAGAGCCACGTCTGAACTCCAGTCACGACATAGTATCTCGTATGCCGTCTTCTG	d__Bacteria	0.772174
GAGTGTTAGAAACATTAGATACCCCAGTAGTCCATGACGAGATCGGAAGAGCACACGTTGAACTCCAGTCACGACATAGTATCTCGTATGCCGTCTTCTG	d__Bacteria	0.727408
GAGTGTTAGAAACATTAGATACCCCAGTAGTCCATGACGAGATCGGAAGGCACACGTCTGAACTCCAGTCACGACATAGTATCTCGTATGCCGTCTTCTG	d__Bacteria	0.703425
GAGTGTTAGAAACATTAGATACCCCGGTAGTCCATGACGAGATCGGAGAGCACACGTCTGAACTCCAGTCACGACATAGTATCTCGTATGCCGTCTTCTG	d__Bacteria	0.714955
GAGTGTTAGAAACATTAGATACCCGAGTAGTCCATGACGAATCGGAAGAGCACACGTCTGAACTCCTGTCACGACATAGTATCTCGTATGCCGTCTTCTG	d__Bacteria	0.835107
GAGTGTTAGAAACATTAGATACCCGTGTAGTCCATGACGAGTCGGAAGAGCACACGTCTGAACTCCAGTCACGACATAGTATCTCGTATGCCGTCTTCTG	d__Bacteria	0.722726
GAGTTCCCTCCTGGAAGTCACGCTCGAAATAGATGTCAAGGAAGGTAGAGATACGACCTACCGACATGGCAGCACCATTCTGGGTCTTCACAGCACCGAG	d__Bacteria	0.835544
GAGTTCCCTCCTGGAAGTCACGCTCGAAATAGATGTCGAGGAAGGTAGAGATACGACCTACCGACATGGCAGCACCATTCTGGGTCTTCACAGCACCGAG	d__Bacteria	0.819001
GAGTTCCCTCCTGGAAGTCACGCTCGAAGTAGATGTCAAGGAAGGTAGAGATACGACCTACCGACATGGCAGCACCATTCTGGGTCTTCACAGCACCGAG	d__Bacteria	0.73976
GAGTTGATTAGAAACCCCTGTAGTCCATGACGAATCGGAAGAGCACACGTCTGAACTCCAGTCACACTCACTGATCTCGTATGCCGTCTTCTGCTTGAAA	d__Bacteria	0.787312
GAGTTGATTAGAAACCCGTGTAGTCCATGACGAGATTCGGAAGAGCACACGTCTGAACTCCAGTCACACTCACTGATCTCGTATGCCGTCTTCTGCTTGA	d__Bacteria	0.776409
GATAAAAATGATTGGCGTATCCAACCTGCAGAGTTTTATCGCTTCCATGACGCAGAAGTTAACACTTTCGGATATTTCTGATGAGTCGAAAAATTATCTT	d__Bacteria	0.708433
GATAATCTTTATGCACGCCGAATCTTCCCGAAGCGACCTGAACTATGGTGTTCTCGCCGTATTCGTAAAAATCCCTGTGCAACCCGCCTTCGCCGGTATT	d__Bacteria	0.821192
GATACAAGCGTTATCCGGAATTACTGGGCGTGAAGCGTATGTAGGTGGTTTTAATATATTTTTAACTAAATAAAACTATATATGTTTAAAAAAAAATTAT	d__Bacteria	0.985188
GATCACCCTGCGAGGCCGCGCCACCATTGAGGAAAAGAAGAATGGCCGCGCTCAGATCATTGTGACCGAGATCCCCTACATGGTCAACAAGGCACGCCTC	d__Bacteria	0.782754
GATCACCGAGGTCAACCGCAGCCGCAAGCGCGTTGTCGGTTCCATCCGTGCCGTCGCTCAGAAAGAGCGCCGCGAGAAGGCAGAGGCCATCTGGAACGAG	d__Bacteria	0.954865
GATGAACGCTAGCGGGAGGCCTAACACATGCAAGCCGAGCGGTAGAGTTTCTTCGGAAACTTGAGAGCGGCGCACGGGTGCGTAACACGTGTGCAACCTA	d__Bacteria	0.878024
GATGATTAGAAACCCCAGTAGTCCATGACGAGATCGGAAGAGCACCACGTCTGAACTCCAGTCACCGAGAGTTATCTCGTATGCCGTCTTCTGCTTGAAA	d__Bacteria	0.748768
GATGATTAGAAACCCCAGTAGTCCATGACGAGATCGGAGAGCACACGTCTGAACTCCAGTCACCGAGCGACATCTCGTATGCCGTCTTCTGCTTGAAAAA	d__Bacteria	0.729063
GATGATTAGATACCCGAGTAGTCCATGACGAATCGGAAGAGCACACGTCTGAACTCCAGTCACCGAGCGACATCTCGTATGCCGTCTTCTGCTTGAAAAA	d__Bacteria	0.832853
GATGTAGGGGGCGAGCGTTATCCGGAATGATTGGGTGTAAAGGGTGAGTAGGCGGCTAGCCAAGTCATATGTTAAAGGCTGCAGCTTAACTGCAGTAAGG	d__Bacteria	0.999264
GATTAGATACCCGAGTAGTCCATGACGAAATCGGAAGACACACGTCTGAACTCCAGTCACCGAGAGTTATCTCGTATGCCGTCTTCTGCTTGAAAAAAAA	d__Bacteria	0.711715
GATTAGATACCCTAGTAGTCCATGACGAATCGGAAGAGCACACGTCTGAACTCCAGTCACCGAGAGTTATCTCGTATGCCGTCTTCTGCTTGAAAAAAAA	d__Bacteria	0.700204
GATTGGGAGTAATTATATCTGCAAGAGGAAGAAGCTTTGTCATAAGTGCATCTGTAGCATCCTCACTGATAAGACGGCTGCCGCTTGTAGCTACCATTAC	d__Bacteria	0.903523
GATTTACCTTTTTGGTTATGGGTTTTTTGATATAGTTGATACCCGGGATAAGGTTCTCGCTCATATAACCGTCGATTATCTCGATTTCGCCGTCAAACTC	d__Bacteria	0.791613
GCAACAAGGTCGGCAACGATGAGGTCGATGTTACCGTCACCGGCGGCGATCAGACCGCTGTGGGCAGCCCCCATACCGCCACCGCCGTCGGCTTGACTGG	d__Bacteria	0.756183
GCAACCTGTGACGACAAATCTGCTCAAATTTATGCGCGCTTCGATAAAAATGATTGGCGTATCCAACCTGCAGAGTTTTATCGCTTCCATGACGCAGAAG	d__Bacteria	0.719082
GCAATCCACCTGGGGAGTACGTTCGCAAGAATGAAACTCAAAGGAATTGACGGCCCTGGCTGACTATCTCGTATGCCGTCTTCTGCTTGAAAAAAAAAAA	d__Bacteria	0.752425
GCAATCCACCTGGGGAGTACGTTCGCAAGAATGAAACTCAAATGAATTGACGGCCCTGGCTGACTATCTCGTATGCCGTCTTCTGCTTGAAAAAAAAAAA	d__Bacteria	0.784203
GCACAAAGAGCACTACAGTCTGCCAGGTGGTGAGGCGGCGTCCTTTCTGCATGCAGATACCGCTGATGTAGAGCGTCATGAGCAGCAGCATCATCGACAT	d__Bacteria	0.791442
GCACACATTAGAAACCCCAGTAGTCCATGAACGAGATCGGAGAGCACACGTCTGAACTCCAGTCACTAGTCTCCATCTCGTATGCCGTCTTCTGCTTGAA	d__Bacteria	0.715558
GCACACATTAGAAACCCGAGTAGTCCATGACGAGATCGGAAAGCACACGTCTGAACTCCAGTCACTAGTCTCCATCTCGTATGCCGTCTTCTGCTTGAAA	d__Bacteria	0.809483
GCACACATTAGAAACCCGAGTAGTCCATGACGAGATCGGGAAGCACACGTCTGAACTCCAGTCACTAGTCTCCATCTCGTATGCCGTCTTCTGCTTGAAA	d__Bacteria	0.811677
GCACACATTAGAAACCCTTGTAGTCCATGACGAGATGGAAGAGCACACGTCTGAACTCCAGTCACTAGTCTCCATCTCGTATGCCGTCTTCTGCTTGAAA	d__Bacteria	0.792969
GCACACATTAGATACCCCAGTAGTCCATGACGAGATCGGAGAGCACACGTCTGAACTCCAGTCACTAGTCTCCATCTCGTATGCCGTCTTCTGCTTGAAA	d__Bacteria	0.712554
GCACACATTAGATACCCCGGTAGTCCATGACGAGATCGGAGAGCACACGTCTGAACTCCAGTCACTAGTCTCCATCTCGTATGCCGTCTTCTGCTTGAAA	d__Bacteria	0.765694
GCACACATTAGATACCCGAGTAGTCCATGACGAGATCGGAAGGCACACGTCTGAACTCCAGTCACTAGTCTCCATCTCGTATGCCGTCTTCTGCTTGAAA	d__Bacteria	0.817456
GCACACATTAGATACCCTAGTAGTCCATGACGAGATCGGAGAGCACACGTCTGAACTCCAGTCACTAGTCTCCATCTCGTATGCCGTCTTCTGCTTGAAA	d__Bacteria	0.760513
GCACACATTAGATACCCTTGTAGTCCATGACGGATCGGAAGACACACGTCTGAACTCCAGTCACTAGTCTCCATCTCGTATGCCGTCTTCTGCTTGAAAA	d__Bacteria	0.778633
GCACAGTGGCATCAACGATTGCGAAAGGCACTTTCAAGAGCTTTGCAATGGTTTTTGCAAGAAGTGTTTTGCCTGTACCTGTAGGGCCAACGATAATGAT	d__Bacteria	0.702632
GCACATTAGAAACCCGAGTAGTCCATGACGAGATCGGAAGGCACACGTCTGAACTCCAGTCACCGAGAGTTATCTCGTATGCCGTCTTCTGCTTGAAAAA	d__Bacteria	0.720648
GCACATTAGATACCCGGGTAGTCCATGACGAAATCGGAGAGCACACGTCTGAACTCCAGTCACCGAGAGTTATCTCGTATGCCGTCTTCTGCTTGAAAAA	d__Bacteria	0.708151
GCACGCCATTAGAAACCCTGGTAGTCCATGACGAGATCGGAAGGCACACGTCTGAACTCCAGTCACGACATAGTATCTCGTATGCCGTCTTCTGCTTGAA	d__Bacteria	0.788152
GCACGCCCTCATGCTGTATCCTTATCGCATTCATGAACGGCACGAGCTCCTTGTACTCTGTCTTTTTCTGGATGACAGAGGCCTGCTCCAGGTTGCCTGC	d__Bacteria	0.766471
GCACTTTTTCTACTGGGCTATGATCAGGCCCTAACACTAAAACTTTATATTGATTAGGTCCTACTTTATCGCGCATCGCGCTAATAGGTAGCGTCATTAC	d__Bacteria	0.855297
GCAGAAGAAAGCCAAGAAGGCACAAACCGAGCTTTGGCCTGATGGCACAAAGATGGATGCCTGGTTCAGCAACGCCCAGAAGGTGAACGTAGATACCCTC	d__Bacteria	0.834946
GCAGAAGACGGACTCAGCATGTTCGATTGGAACGAATCGGTTCATCGTCTGCAACAGCGCGTGGCACAAGTAGCTGAGTGGCATCCGGAGTTGGAGATTC	d__Bacteria	0.801827
GCAGAAGACGGCAAGCCTTCAGTCTCGCCTCCCTGGATAATTTTCTCGATTATTACCGACGTGGCCGCTGACGTTCTCTGCGGTCAGGCTGAATCAGCCG	d__Bacteria	0.715337
GCAGAAGACGGCATCCGAGAATATCAATGAGGTATATCCTACCTATTATCCTCCTCGCAAGACGCCGAAGGAATGTTATGAGCAGATTATCGCCGATTTG	d__Bacteria	0.732309
GCAGAAGACGGCGCACGAGTCATAAGACAGTACGCAGTAGGGGATACCTACGCAACCGAACTTGAGCTTGATACAAGGGTAATCTACGATCTTTATCAGA	d__Bacteria	0.787944
GCAGAATACCTGTCCACGTGTCCATCATCATGGACGGAAACGGACGTTGGGCTCAGGAAAGGGGCCTTGAACGTGTTTGTGGTCACAAGAAAGGTGTGGA	d__Bacteria	0.848744
GCAGAATACGCAACTCAAAGGTTACAGGCTCAAGATATACAAGAGCCTGGTATATAAGAACCACGCCACGGAAATAGCCCACTATCTGAAGTCCGACCGC	d__Bacteria	0.767775
GCAGATCCGTGTTCTCCAGACCATATACCTGATTGTGCAGATCAGCGATCATCACAATGCGTAATGGTTTCCGGACTTTCTGACTGATAAAATTGTAACG	d__Bacteria	0.858174
GCAGCAATTGCGGCAGTTGCGACCGCAACAAGCTCTTCCTCACTGTCACCGGCAGGTGCCTCTGCAGCTTTGGGAGCGGGCGCTGTCGTTGCCGTAGCCT	d__Bacteria	0.73284
GCAGCTTCCGCTCCTCCTCCATATTCGCATGGACGAATTTCGGCATGAGCTGCACGAACAGCACGACGCCGATCACACCGAACAGGTACGCAATGCCGTA	d__Bacteria	0.883794
GCAGGAGTTAGCTTCCTGCCCCCAACACCCCCACAGCGTGGGGCTTTTGGTGGTAGAAAGGTGATTTCTGAACGGTGGCAAAAACGCTACCGAAAATACA	d__Bacteria	0.890079
GCATCAGTTGGAGTAGATATTTAGTAGTGTTTCTGCAAGGAGTAGGCATAGAACTCCCCCACTCGCTTACGGCATGTCCTTGGGATGGAGGAATTATAAA	d__Bacteria	0.855573
GCATCATCTACAGCATCGTAGTTACCTATATTATCTTCAAGGTAGTAGATAAGAGTGTAGGTGTACGTGTTGACAAGCGAGTAGAGGAGGAAGGTCTCGA	d__Bacteria	0.850504
GCATCTTCTTCGGATACCCAACCATCCCTTTCAGCGGATGCCCAGCCTTTTTGTGCTTCATCCAGCAGGCGGCGCATAGCTTTGGCTTTCATATATTCCG	d__Bacteria	0.7244
GCATGACATTAGATACCCCTGTAGTCCATGACGAGATCGGAGAGCACACGTCTGAACTCCAGTCACGTCTATGAATCTCGTATGCCGTCTTCTGCTTGAA	d__Bacteria	0.736743
GCCACAAAGGCATAAGACGTTGACGCTTCATATATGTACCAGCGATATAGGCTGTAAGGGTGATGAGGAATAGCGACAAGGCGAAATGGTCGGGCACAAA	d__Bacteria	0.839317
GCCACATAGAACAATGCGCCCAGTCCGGCGATGCCTTTCGCCACGCCCGCCATGTCATCGCACAGCGGCATCATCTGCTCGTAGAGCGAGCGTAAAATCT	d__Bacteria	0.865731
GCCAGACGGAGGAACTGACTCCCGCGGAATTGCAGATCCTGCACTTGATTTGCGCCGATAAGAGCAACGCCGAAATCGCGCAGATGATGGACATAAAACT	d__Bacteria	0.939258
GCCAGCGCTACAGAGCAGGGCGATGATATGGGGTTTGAACGGCAGTGACATGGAAGCTCCTGACCCAAAAAGTAACCCATCTCGCTAAAGTATCGGCGAA	d__Bacteria	0.746812
GCCAGCTTCACCTTGGTGCCAGTCACCACCACGTCATCGAGGGCAACATCCTGATTGAATTTCTTCTTGAGCAAAAGCGAAGGGAATGAGAAACCCTAGT	d__Bacteria	0.872895
GCCCGAGGATGCCCGCGTTCTCCGGCATGCTTGGGCGTCCCGCGTCTGTCGGTGGCTTTTTCCGTCCGCCGTCCCCTCCCCGGGCTCCCCCCTGGCCCGG	d__Bacteria	0.789199
GCCGCGGTAATACAGGAGACCCAAATTAACTTTATAACGGCGTAAAGAGTGGTCACATGCTATCCAAGTAGCTAAGATTAAAAAGCAGCTGAGCTGTCAT	d__Bacteria	0.914161
GCCGGAGGATGCCCGCGTTCTCCGGCATGCTTGGGCGTCCCGCGTCTGTCGGTGGCTTGTCCCGTCTTCTGTTCCCGCTCGGGGCTTCCCCCCGTTCCCG	d__Bacteria	0.873212
GCCGTACTGATGAAATACACAGTATATGAAAGCGGACAATTTAAAATAAGAAAAGAGATAGAGGCGGATTCTAAAGAGGAAGCTGAACTAAAATTTGAAG	d__Bacteria	0.858002
GCCGTACTGATGACTTTACAGAAATAGAAGACGACGGAAGAATTCCTTTCTAGATTTTAGGAGGATAAAATGCGTAGAAATTTCAGACCAAGAAAAAAAG	d__Bacteria	0.968552
GCCGTACTGATGATGCAAGAGAAGGAATTACTGCAATTATTTCAGTAAAAATTTCAAATCCTCAATTTGAAGGACAAACAAAGGGAAAACTTGGAAATAG	d__Bacteria	0.899545
GCCGTACTGATGATGTATATCTTTGCCCTGCCTATATAATTATTGGACAAATAATTGCCTTAGTAACCAGCCTTAGAGTAGGAAATACTCCAGATAATCC	d__Bacteria	0.763156
GCCGTACTGATGGAAAAAGGACTTCAAACTGGAATTTTATCAGTTGGTGGCGACGTTGCAATAATTGGAAAAAATCCTACAAGACCATCAGGAAAATTTA	d__Bacteria	0.826943
GCCGTACTGATGGAAATGATGGATCTTGAGGTTTTAAAACTAACAATTTAATTCCATCAACAATTTCAAAAGGTCTAATCCTCCCAACAGCAGGTTTTAA	d__Bacteria	0.830276
GCCGTACTGATGGATATGTATTTGTAAGAACCGAAACTGATGATAAGGGTAATACAAAACATATCTACAAGAAAAAAACCACTCCTAGTCCATCTGTAGT	d__Bacteria	0.840748
GCCGTACTGATGGGAATTGCCGTTAGGCAAATTCAAACGTTTAGACCCTTACATTCGGAAGTACGTCAGTGCTTTGGTATACACATTCTCACCATGCGTA	d__Bacteria	0.906452
GCCGTACTGATGTAGACGATATTAAATTTGGTATAGAAAACGGCATCGACATGATAGCAGCATCTTTTGTTAGGAAAAAAGAAGACATTTATGATATAAG	d__Bacteria	0.726272
GCCGTACTGATGTCATGGGGATTTTGGGCGATGGTCGTGATCTTGCTGTTCTTGATGAGGCTAATGTGGATGAGTGCGATGCTTTTATTGCAATGACTTT	d__Bacteria	0.742429
GCCGTACTGATGTCTTCGATAATATCAATGATCAAGTTTGTGATTATGAAATCGCTGGAAAGTTAGGTGTAGATATAAATTTACTAAATCTAAAAATTTC	d__Bacteria	0.796992
GCCGTTGAATTCTTACGGGCTGACCAAGAAGGTGGTGTATGAGAATGAAGAGTTTAATTTGCTGCAAGCGGCTCTTAACATAGAAGAAGGCATAGAGGGA	d__Bacteria	0.751259
GCCTGCACTCAGCTACCGGTTTGCCTATTTCTCGGGCGACAACCCGAAAACCCGGACCTACGAACGCTGGGACGCCCTCTACACCGGAGGCAACGGCGAG	d__Bacteria	0.740221
GCCTTACCCAGTGCAAAGGTGCAGTCGGCATAGCAGAGCATATCACCCAGCTGAATGCCATACAGTTCAAACTTCTTTCCGCTGCGCAGGATGGTATAGG	d__Bacteria	0.845612
GCCTTATCCTAATAAAGGAGGAACTTGGGTTGGTGCGCATGAATGTGCAAAATTTAATTTGTCAAAACTCTTGGTAAGAGAAGCTGAAAATAGAACTCCT	d__Bacteria	0.745842
GCCTTGGGAACACTCTGAACGCAAGCAAATCCGTATTGTCGATCCACTCCGTCCACAAGGTGCTTTCGACGCCCAGAACGTTTTGCTCGTATCCTTCGAT	d__Bacteria	0.84824
GCGAAAGCGTTTCGTTTTCCAATTCACCTTCGTCCATAATGGTGCGATTGTGAAACAACGTTTCTTGCGAGGGTGCGCTGATGAGCATAAGTTTTTCAAG	d__Bacteria	0.861899
GCGAAATGTTCTTCGTTACCTGGTATAAGGCGCTGGTCAACTTCACGAGTGCAGATAACTGGGCGAAGGCTGGCATCCTCTCCATCGTCATGGCGCTGCT	d__Bacteria	0.924267
GCGACAAATCAGACAAATCGAATCCTTCTCCGCAGTTCGACCCCGAATAATCTCTGGCCAAAGACACACTGGCACTGCCGCAAAATACAATGGCAACATC	d__Bacteria	0.715467
GCGAGAGCGTATAGAGCGCGTTTCCGTCCAGAAAAGCGGAAACGGTGCCGTTCGTTACAAAATCGGAGAAAGAGTTTTCGGCAAGCGAGTGCTTGGTTCC	d__Bacteria	0.718808
GCGAGTAGGATAAGCGTAATTCATTATTACTAGGTGTATAGCGTCTGTAGGCGGCGGACCCCGCGTAGGCGGGCAGCTAGAGTGTTTAATAGGAAAGGGG	d__Bacteria	0.856973
GCGAGTAGGATAAGCGTAATTCATTATTACTAGGTGTATAGCGTCTGTAGGCGGCGGTCCCCGCGTAGGCGGGCAGCTAGAGTGTTTAATAGGAAAGGGG	d__Bacteria	0.874946
GCGAGTTATTGATCCAGGCGACAGGTTCCCCCACCACAAACAGCATCAGACTGCCCGCTCCCAACGTACCGAGCACCGGGTAGAGATAAAAAGTCAGGAA	d__Bacteria	0.847313
GCGCGCTTCGATAAAAATGATTGGCGTATCCAACCTGCAGAGTTTTATCGCTTCCATGACGCAGAAGTTAACACTTTCGGATATTTCTGATGAGTCGAAA	d__Bacteria	0.787489
GCGCGTAGAATGTCCACTTAAGCGCGGTGGTTTGGGTGAGATTCATGCGCGCCTCCCTCAGTCGACAATGTCGTAGTCCGTGATGACGAACACCTCGGTC	d__Bacteria	0.768348
GCGCTTCGATAAAAATGATTGGCGTATCCAACCTGCAGAGTTTTATCGCTTCCATGACGCAGAAGTTAACACTTTCGGATATTTCTGATGAGTCGAAAAA	d__Bacteria	0.804838
GCGGAGGGGACAAGCGTTATTCATCCTTATTGGGCGTAAAGGGTATGTAGGTTATGAAAGAGATTTTTTCTGAAATTTCAAATTTGCGTTTTGAAAGTGG	d__Bacteria	0.977107
GCGGCAAAGGAGAGGAATATGTGTTTACTGAGGAAGGGGTCAATACCGGAACGCTTTATGTGAAAGACACCAGTACCGGATACATTGGTTCCCCAGTAGT	d__Bacteria	0.869526
GCGGCGCAACCTGTGACGACAAATCTGCTCAAATTTATGCGCGCTTCGATAAAAATGATTGGCGTATCCAACCTGCAGAGTTTTATCGCTTCCATGACGC	d__Bacteria	0.735541
GCGGTAATACAGGAGACCCAAATTAACTTTATAACGGCGTAAAGAGTGGTCACATGCTATCCAAGTAGCTAAGATTAAAAAGCAGCTGAGCTGTCATAAG	d__Bacteria	0.913208
GCGTATTAGAAAACCCCTGTAGTCCATGACGAGGAAGAGCACACGTCTGAACTCCAGTCACGTCTATGAATCTCGTATGCCGTCTTCTGCTTGAAAAAAA	d__Bacteria	0.747521
GCGTATTAGAAACCCCAGTAGTCCATGACGAGATCGGAGAGCACACGTCTGAACTCCAGTCACGTCTATGAATCTCGTATGCCGTCTTCTGCTTGAAAAA	d__Bacteria	0.761838
GCGTATTAGAAACCCCGGTAGTCCATGACGAGATCGGAAGGCACACGTCTGAACTCCAGTCACGTCTATGAATCTCGTATGCCGTCTTCTGCTTGAAAAA	d__Bacteria	0.828074
GCGTATTAGAAACCCGAGTAGTCCATGACGAGATCAGAGCACACGTCTGAACTCCAGTCACGTCTATGAATCTCGTATGCCGTCTTCTGCTTGAAAAAAA	d__Bacteria	0.77392
GCGTATTAGAAACCCGGGTAGTCCATGACGAGATCGGAAAGCACACGTCTGAACTCCAGTCACGTCTATGAATCTCGTATGCCGTCTTCTGCTTGAAAAA	d__Bacteria	0.79908
GCGTATTAGAAACCCGGGTAGTCCATGACGAGGTCGGAAGAGCACCACGTCTGAACTCCAGTCACGTCTATGAATCTCGTATGCCGTCTTCTGCTTGAAA	d__Bacteria	0.865155
GCGTATTAGAAACCCGTGTAGTCCATGACGAGAGAGCACACGTCTGAACTCCAGTCACGTCTATGAATCTCGTATGCCGTCTTCTGCTTGAAAAAAAAAA	d__Bacteria	0.75165
GCGTATTAGAAACCCGTGTAGTCCATGCGAGATCGGAAGAGCACACGTCTGACTCCAGTCACGTCTATGAATCTCGTATGCCGTCTTCTGCTTGAAAAAA	d__Bacteria	0.801827
GCGTATTAGAAACCCTAGTAGTCCATGACGAGATCGGAGAGCACACGTCTGAACTCCAGTCACGTCTATGAATCTCGTATGCCGTCTTCTGCTTGAAAAA	d__Bacteria	0.803051
GCGTATTAGAAACCCTTGTAGTCCATGACGAGATCGGAAAGCACACGTCTGAACTCCAGTCACGTCTATGAATCTCGTATGCCGTCTTCTGCTTGAAAAA	d__Bacteria	0.783354
GCGTATTAGATACCCCTGTAGTCCATGACGAGATCGGAAGACACACGTCTGAACTCCAGTCACGTCTATGAATCTCGTATGCCGTCTTCTGCTTGAAAAA	d__Bacteria	0.742462
GCGTATTAGATACCCGGGTAGTCCATGACGAGAGGAAGAGCACACGTCTGAACTCCAGTCACGTCTATGAATCTCGTATGCCGTCTTCTGCTTGAAAAAA	d__Bacteria	0.805524
GCGTATTAGATACCCGTGTAGTCCATGACGAGATCGGAAGACACACGTCTGAACTCCAGTCACGTCTATGAATCTCGTATGCCGTCTTCTGCTTGAAAAA	d__Bacteria	0.806168
GCGTATTAGATACCCTAGTAGTCCATGACGAGAGAGCACACGTCTGAACTCCAGTCACGTCTATGAATCTCGTATGCCGTCTTCTGCTTGAAAAAAAAAA	d__Bacteria	0.703003
GCGTATTAGATACCCTAGTAGTCCATGACGAGATCGGAAAGCACACGTCTGAACTCCAGTCACGTCTATGAATCTCGTATGCCGTCTTCTGCTTGAAAAA	d__Bacteria	0.750891
GCGTATTAGATACCCTAGTAGTCCATGACGAGATCGGAGAGCACACGTCTGAACTCCAGTCACGTCTATGAATCTCGTATGCCGTCTTCTGCTTGAAAAA	d__Bacteria	0.771026
GCGTATTAGATACCCTGGTAGTCCATGACGAGATCGGAAAGCACACGTCTGAACTCCAGTCACGTCTATGAATCTCGTATGCCGTCTTCTGCTTGAAAAA	d__Bacteria	0.734581
GCGTATTCGAAACCCGTGTAGTCCATGAATCGGAAGAGCACACGTCTGAACTCCAGTCACGTCTATGAATCTCGTATGCCGTCTTCTGCTTGAAAAAAAA	d__Bacteria	0.786127
GCGTCAATCAGGTAATCGTAAAGCTTCTCGATTTCTACCGCAAGAAACAACCGAAACAGGAAATTACCAAGTATTTTTCGCTCCGTCCCGAAAAGGCGAG	d__Bacteria	0.718606
GCGTCGTATTAGAAACCCCAGTAGTCCATGACGAGATCGGAAGACACACGTCTGAACTCCAGTCACCGAGAGTTATCTCGTATGCCGTCTTCTGCTTGAA	d__Bacteria	0.704487
GCGTCGTATTAGAAACCCCGGTAGTCCATGACGAGATCGGAGAGCACACGTCTGAACTCCAGTCACGTCTATGAATCTCGTATGCCGTCTTCTGCTTGAA	d__Bacteria	0.823113
GCGTCGTATTAGAAACCCGAATAGTCCATGACGAGATCGGGAAGAGCACACGTCTGAACTCCAGTCACGTCTATGAATCTCGTATGCCGTCTTCTGCTTG	d__Bacteria	0.858118
GCGTCGTATTAGATACCCCAGTAGTCCATGACGAGATCGGAAGACACACGTCTGAACTCCAGTCACCGAGCGACATCTCGTATGCCGTCTTCTGCTTGAA	d__Bacteria	0.779719
GCGTCTAGTTTAGAAGCCCGCATAGCTTGTAAGGTTCTATCATCTCTCGTCGGACCAGGTTGACGCGAAATAACAGCATAACCACTAGCTCGATACACCG	d__Bacteria	0.783237
GCGTGTAGCGGAGAGGCATGGTGAGCGTGTCGCCGGGCAGGCAGCGCGTGAGCAGCAAGGCGATATCGGAGAAGGGATAGCGCTCGGATGCTGTGAAACG	d__Bacteria	0.88544
GCGTTCCCGCCGCAAGAAAATCGTTGACCATAATCGGAAGCAGGCATTCCGCGCGGCATTCATCCGGAGGAAGCGCACGCAGAAAGTCCTCAAAATAGGG	d__Bacteria	0.832641
GCTCCGCAAACACCGAAACGCTTCTCGCTTTACCGTTTTCCGTGCCTTCTATAACCGCATTGACTTTTGCGGTTTCGCCGACGAAAAGCGTTACGTCCTC	d__Bacteria	0.871132
GCTGACCACTACCGGTGTTGATGCTGCTACCGATATTCCCGGTGCATTCTTCACTGGCTGCAAAGAGACCGTTAAGGGTGTCGTACTCGCAGAAATTGCG	d__Bacteria	0.785547
GCTGATCACCGCCACTGCCGTAACTCCTGACACAGAACAGAAGATGCGCAAGATGGTGGAACAGAGAACGCAAGGTACTGTGGAGTTCAAGACTGAGGTG	d__Bacteria	0.880521
GCTGATCACCGCCACTGCCGTTGACGCCTCTACTGAGGATAAGATGCGCAAGATGGTGGAGCAGAGAACGCAAGGTACTATGGAGTTCAAGACTGAGGTG	d__Bacteria	0.84568
GCTGATCACCGCCACTGCCGTTGACGCCTCTACTGAGGATAAGATGCGCAAGATGGTGGAGCAGAGAACGCAAGGTACTGTGGAGTTCAAGACTGAGGTG	d__Bacteria	0.837238
GCTGCGATAAGCTACGGAGAGGTGCAAGCAACCTTTGACCCGTAGATTTCCGAATGGGGGAACCCGGCAGTGGTTATGCACTGTCACCCATAGCTTAGAC	d__Bacteria	0.876252
GCTGTTAATATTGCAGATTTAGACTTTTCAGTTCTGAATGTAGCAACATTTGCAACTCTGTCATCTCCATAATACTGACGGAACGTTGATAAAACATTGT	d__Bacteria	0.764462
GCTTCGATAAAAATGATTGGCGTATCCAACCTGCAGAGTTTTATCGCTTCCATGACGCAGAAGTTAACACTTTCGGATATTTCTGATGAGTCGAAAAATT	d__Bacteria	0.8142
GGAAAGAGATTAGAAACCCCGGTAGTCCATGACGAGATCCGGAAGAGCACACGTCTGAACTCCAGTCACACTCACTGATCTCGTATGCCGTCTTCTGCTT	d__Bacteria	0.8427
GGAAAGAGATTAGATACCCTGGTAGTCCATGACGAATCGGAAGAGCACACGTCTGAACTCCAGTCACACTCACTGATCTCGTATGCCGTCTTCTGCTTGA	d__Bacteria	0.798331
GGAAAGAGCATTAGAAACCCGTGTAGTCCATGACGAGGAAGAGCACACGTCTGAACTCCAGTCACGTCTATGAATCTCGTATGCCGTCTTCTGCTTGAAA	d__Bacteria	0.860636
GGAAAGAGTACTAGAAACCCCTGTAGTCCATGACGAGATCGGAAAGCACACGTCTGAACTCCAGTCACGTCTATGAATCTCGTATGCCGTCTTCTGCTTG	d__Bacteria	0.806708
GGAAAGAGTATTAGAAACCCCAGTAGTCCATGACGAGACGGAAGAGCACACGTCTGAACTCCAGTCACCGAGAGTTATCTCGTATGCCGTCTTCTGCTTG	d__Bacteria	0.708149
GGAAAGAGTATTAGAAACCCCAGTAGTCCATGACGAGATCGGAAAGCACACGTCTGAACTCCAGTCACCGAGAGTTATCTCGTATGCCGTCTTCTGCTTG	d__Bacteria	0.718742
GGAAAGAGTATTAGAAACCCCAGTAGTCCATGACGAGATCGGAAAGCACACGTCTGAACTCCAGTCACGTCTATGAATCTCGTATGCCGTCTTCTGCTTG	d__Bacteria	0.808369
GGAAAGAGTATTAGAAACCCCAGTAGTCCATGACGAGATCGGAGAGCACACGTCTGAACTCCAGTCACGTCTATGAATCTCGTATGCCGTCTTCTGCTTG	d__Bacteria	0.816506
GGAAAGAGTATTAGAAACCCCAGTAGTCCATGACGAGATGGAAGAGCACACGTCTGAACTCCAGTCACCGAGAGTTATCTCGTATGCCGTCTTCTGCTTG	d__Bacteria	0.746218
GGAAAGAGTATTAGAAACCCCAGTAGTCCATGACGAGATGGAAGAGCACACGTCTGAACTCCAGTCACGACATAGTATCTCGTATGCCGTCTTCTGCTTG	d__Bacteria	0.773555
GGAAAGAGTATTAGAAACCCCGGTAGTCCATGACGAATCGGAAGAGCACACGTCTGAACTCCAGTCACGTCTATGAATCTCGTATGCCGTCTTCTGCTTG	d__Bacteria	0.895165
GGAAAGAGTATTAGAAACCCCGGTAGTCCATGACGAGACGGAAGAGCACACGTCTGAACTCCAGTCACGTCTATGAATCTCGTATGCCGTCTTCTGCTTG	d__Bacteria	0.840697
GGAAAGAGTATTAGAAACCCCGGTAGTCCATGACGAGATCGGAAAGCACACGTCTGAACTCCAGTCACCGAGAGTTATCTCGTATGCCGTCTTCTGCTTG	d__Bacteria	0.773562
GGAAAGAGTATTAGAAACCCCGGTAGTCCATGACGAGATCGGAAGACACACGTCTGAACTCCAGTCACCGAGAGTTATCTCGTATGCCGTCTTCTGCTTG	d__Bacteria	0.80474
GGAAAGAGTATTAGAAACCCCGGTAGTCCATGACGAGATCGGAAGAGCACACGTCTGAATCCAGTCACACGCTACTATCTCGTATGCCGTCTTCTGCTTG	d__Bacteria	0.835244
GGAAAGAGTATTAGAAACCCCGGTAGTCCATGACGAGATCGGAGAGCACACGTCTGAACTCCAGTCACGTCTATGAATCTCGTATGCCGTCTTCTGCTTG	d__Bacteria	0.852955
GGAAAGAGTATTAGAAACCCCGGTAGTCCGTGACGAGATCGGAAGAGCACACGTCTGACTCCAGTCACGACATAGTATCTCGTATGCCGTCTTCTGCTTG	d__Bacteria	0.8557
GGAAAGAGTATTAGAAACCCCTGTAGTCCATGACGAGACGGAAGAGCACACGTCTGAACTCCAGTCACGTCTATGAATCTCGTATGCCGTCTTCTGCTTG	d__Bacteria	0.78118
GGAAAGAGTATTAGAAACCCCTGTAGTCCATGACGAGATCGGAAAGCACACGTCTGAACTCCAGTCACCGAGAGTTATCTCGTATGCCGTCTTCTGCTTG	d__Bacteria	0.715013
GGAAAGAGTATTAGAAACCCCTGTAGTCCATGACGAGATCGGAAGAGCACACGTCTGACTCCAGTCACACGCTACTATCTCGTATGCCGTCTTCTGCTTG	d__Bacteria	0.786305
GGAAAGAGTATTAGAAACCCCTGTAGTCCATGACGAGATCGGAAGAGCACACGTCTGACTCCAGTCACCGAGAGTTATCTCGTATGCCGTCTTCTGCTTG	d__Bacteria	0.779034
GGAAAGAGTATTAGAAACCCGAGTAGTCCATGACGAGACGGAAGAGCACACGTCTGAACTCCAGTCACCGAGAGTTATCTCGTATGCCGTCTTCTGCTTG	d__Bacteria	0.764453
GGAAAGAGTATTAGAAACCCGAGTAGTCCATGACGAGATCGGAAAGCACACGTCTGAACTCCAGTCACAACATAGTATCTCGTATGCCGTCTTCTGCTTG	d__Bacteria	0.791666
GGAAAGAGTATTAGAAACCCGAGTAGTCCATGACGAGATCGGAAAGCACACGTCTGAACTCCAGTCACCGAGAGTTATCTCGTATGCCGTCTTCTGCTTG	d__Bacteria	0.782667
GGAAAGAGTATTAGAAACCCGAGTAGTCCATGACGAGATCGGAAAGCACACGTCTGAACTCCAGTCACGACATAGTATCTCGTATGCCGTCTTCTGCTTG	d__Bacteria	0.81285
GGAAAGAGTATTAGAAACCCGAGTAGTCCATGACGAGATCGGAAAGCACACGTCTGAACTCCAGTCACGTCTATGAATCTCGTATGCCGTCTTCTGCTTG	d__Bacteria	0.850856
GGAAAGAGTATTAGAAACCCGGGTAGTCCATGACGAGATCCGGAAGAGCACACGTCTGAACTCCAGTCACGACATAGTATCTCGTATGCCGTCTTCTGCT	d__Bacteria	0.8614
GGAAAGAGTATTAGAAACCCGGGTAGTCCATGACGAGATCGGAAAGCACACGTCTGAACTCCAGTCACGTCTATGAATCTCGTATGCCGTCTTCTGCTTG	d__Bacteria	0.847309
GGAAAGAGTATTAGAAACCCGGGTAGTCCATGACGAGATCGGAAGAGCACACGTCTGAACCCAGTCACCGAGAGTTATCTCGTATGCCGTCTTCTGCTTG	d__Bacteria	0.860026
GGAAAGAGTATTAGAAACCCGTGTAGTCCATGACGAGATCGGAAAGCACACGTCTGAACTCCAGTCACCGAGAGTTATCTCGTATGCCGTCTTCTGCTTG	d__Bacteria	0.770188
GGAAAGAGTATTAGAAACCCGTGTAGTCCATGACGAGATCGGAAGAGCACACGTCTGACTCCAGTCACGTCTATGAATCTCGTATGCCGTCTTCTGCTTG	d__Bacteria	0.882415
GGAAAGAGTATTAGAAACCCTAGTAGTCCATGACGAGATAGAGCACACGTCTGAACTCCAGTCACGTCTATGAATCTCGTATGCCGTCTTCTGCTTGAAA	d__Bacteria	0.808667
GGAAAGAGTATTAGAAACCCTAGTAGTCCATGACGAGATCGGAAAGCACACGTCTGAACTCCAGTCACCGAGAGTTATCTCGTATGCCGTCTTCTGCTTG	d__Bacteria	0.769997
GGAAAGAGTATTAGAAACCCTAGTAGTCCATGACGAGATCGGAAGAGCACACGCTGAACTCCAGTCACGTCTATGAATCTCGTATGCCGTCTTCTGCTTG	d__Bacteria	0.901686
GGAAAGAGTATTAGAAACCCTAGTAGTCCATGACGAGATCGGAAGAGCACACGTCTGAACTCAGTCACGACATAGTATCTCGTATGCCGTCTTCTGCTTG	d__Bacteria	0.868344
GGAAAGAGTATTAGAAACCCTAGTAGTCCATGACGAGATCGGAAGCACACGTCTGAACTCCAGTCACGTCTATGAATCTCGTATGCCGTCTTCTGCTTGA	d__Bacteria	0.860419
GGAAAGAGTATTAGAAACCCTAGTAGTCCATGACGAGATCGGAGAGCACACGTCTGAACTCCAGTCACGTCTATGAATCTCGTATGCCGTCTTCTGCTTG	d__Bacteria	0.846829
GGAAAGAGTATTAGAAACCCTAGTAGTCCATGACGAGATCGGGAGCACACGTCTGAACTCCAGTCACCGAGAGTTATCTCGTATGCCGTCTTCTGCTTGA	d__Bacteria	0.817721
GGAAAGAGTATTAGAAACCCTGGTAGTCCATGACGAGATCGGAAGACACACGTCTGAACTCCAGTCACCGAGAGTTATCTCGTATGCCGTCTTCTGCTTG	d__Bacteria	0.803681
GGAAAGAGTATTAGAAACCCTGGTAGTCCATGACGAGATCGGAAGACACACGTCTGAACTCCAGTCACGTCTATGAATCTCGTATGCCGTCTTCTGCTTG	d__Bacteria	0.867865
GGAAAGAGTATTAGAAACCCTGGTAGTCCATGACGAGATCGGAAGAGCACACGTCTGAATCCAGTCACCGAGAGTTATCTCGTATGCCGTCTTCTGCTTG	d__Bacteria	0.826995
GGAAAGAGTATTAGAAACCCTGGTAGTCCATGACGAGATCGGAAGAGCACACGTCTGACTCCAGTCACCGAGAGTTATCTCGTATGCCGTCTTCTGCTTG	d__Bacteria	0.830298
GGAAAGAGTATTAGAAACCCTGGTAGTCCATGACGAGATCGGAAGGCACACGTCTGAACTCCAGTCACGTCTATGAATCTCGTATGCCGTCTTCTGCTTG	d__Bacteria	0.869259
GGAAAGAGTATTAGAAACCCTGGTAGTCCATGACGAGATCGGAGAGCACACGTCTGAACTCCAGTCACCGAGAGTTATCTCGTATGCCGTCTTCTGCTTG	d__Bacteria	0.780518
GGAAAGAGTATTAGAAACCCTTGTAGTCCATGACGAGATCGAAGAGCACACGTCTGAACTCCAGTCACGTCTATGAATCTCGTATGCCGTCTTCTGCTTG	d__Bacteria	0.744412
GGAAAGAGTATTAGAAACCCTTGTAGTCCATGACGAGATCGGAAAGCACACGTCTGAACTCCAGTCACGTCTATGAATCTCGTATGCCGTCTTCTGCTTG	d__Bacteria	0.839909
GGAAAGAGTATTAGAAACCCTTGTAGTCCATGACGAGATCGGAAGACACACGTCTGAACTCCAGTCACGTCTATGAATCTCGTATGCCGTCTTCTGCTTG	d__Bacteria	0.863731
GGAAAGAGTATTAGAAACCCTTGTAGTCCATGACGAGATGGAAGAGCACACGTCTGAACTCCAGTCACATCTATGAATCTCGTATGCCGTCTTCTGCTTG	d__Bacteria	0.830781
GGAAAGAGTATTAGATACCCCAGTAGTCCATGACGAGATCGGAAAGCACACGTCTGAACTCCAGTCACGACATAGTATCTCGTATGCCGTCTTCTGCTTG	d__Bacteria	0.726468
GGAAAGAGTATTAGATACCCCAGTAGTCCATGACGAGATCGGAAAGCACACGTCTGAACTCCAGTCACGTCTATGAATCTCGTATGCCGTCTTCTGCTTG	d__Bacteria	0.778917
GGAAAGAGTATTAGATACCCCAGTAGTCCATGACGAGATCGGAAGACACACGTCTGAACTCCAGTCACGACATAGTATCTCGTATGCCGTCTTCTGCTTG	d__Bacteria	0.761486
GGAAAGAGTATTAGATACCCCAGTAGTCCATGACGAGATCGGAAGAGACACGTCTGAACTCCAGTCACCGAGAGTTATCTCGTATGCCGTCTTCTGCTTG	d__Bacteria	0.701308
GGAAAGAGTATTAGATACCCCAGTAGTCCATGACGAGATCGGAAGAGCACACGTTGAACTCCAGTCACCGAGAGTTATCTCGTATGCCGTCTTCTGCTTG	d__Bacteria	0.764754
GGAAAGAGTATTAGATACCCCGGTAGTCCATGACGAGATCGGAAAGCACACGTCTGAACTCCAGTCACGTCTATGAATCTCGTATGCCGTCTTCTGCTTG	d__Bacteria	0.815429
GGAAAGAGTATTAGATACCCCGGTAGTCCATGACGAGATGGAAGAGCACACGTCTGAACTCCAGTCACGTCTATGAATCTCGTATGCCGTCTTCTGCTTG	d__Bacteria	0.831987
GGAAAGAGTATTAGATACCCCTGTAGTCCATGACGAGATCGGAAAGAGCACACGTCTGAACTCCAGTCACCGAGAGTTATCTCGTATGCCGTCTTCTGCT	d__Bacteria	0.748841
GGAAAGAGTATTAGATACCCCTGTAGTCCATGACGAGATCGGAAAGCACACGTCTGAACTCCAGTCACGTCTATGAATCTCGTATGCCGTCTTCTGCTTG	d__Bacteria	0.776747
GGAAAGAGTATTAGATACCCCTGTAGTCCATGACGAGATCGGAAGAGCACACGTCTGACTCCAGTCACGACATAGTATCTCGTATGCCGTCTTCTGCTTG	d__Bacteria	0.782228
GGAAAGAGTATTAGATACCCCTGTAGTCCATGACGAGATCGGAAGGCACACGTCTGAACTCCAGTCACCGAGAGTTATCTCGTATGCCGTCTTCTGCTTG	d__Bacteria	0.720889
GGAAAGAGTATTAGATACCCCTGTAGTCCATGACGAGATCGGAAGGCACACGTCTGAACTCCAGTCACGTCTATGAATCTCGTATGCCGTCTTCTGCTTG	d__Bacteria	0.80549
GGAAAGAGTATTAGATACCCGAGTAGTCCATGACGAGATCGGAAAGCACACGTCTGAACTCCAGTCACGTCTATGAATCTCGTATGCCGTCTTCTGCTTG	d__Bacteria	0.831757
GGAAAGAGTATTAGATACCCGAGTAGTCCATGACGAGATCGGAGAGCACACGTCTGAACTCCAGTCACTGAGTACGATCTCGTATGCCGTCTTCTGCTTG	d__Bacteria	0.831656
GGAAAGAGTATTAGATACCCGGGTAGTCCATGACGAGATCGAAGAGCACACGTCTGAACTCCAGTCACGTCTATGAATCTCGTATGCCGTCTTCTGCTTG	d__Bacteria	0.732761
GGAAAGAGTATTAGATACCCGGGTAGTCCATGACGAGATTCGGAAGAGCACACGTCTGAACTCCAGTCACGTCTATGAATCTCGTATGCCGTCTTCTGCT	d__Bacteria	0.848332
GGAAAGAGTATTAGATACCCGTGTAGTCCATGACGAGATCGGAAAGCACACGTCTGAACTCCAGTCACCGAGAGTTATCTCGTATGCCGTCTTCTGCTTG	d__Bacteria	0.740719
GGAAAGAGTATTAGATACCCGTGTAGTCCATGACGAGATCGGAAGAGCACGTCTGAACTCCAGTCACCGAGAGTTATCTCGTATGCCGTCTTCTGCTTGA	d__Bacteria	0.812452
GGAAAGAGTATTAGATACCCTAGTAGTCCATGACGAGACGGAAGAGCACACGTCTGAACTCCAGTCACGTCTATGAATCTCGTATGCCGTCTTCTGCTTG	d__Bacteria	0.7997
GGAAAGAGTATTAGATACCCTAGTAGTCCATGACGAGATCGGAAAGCACACGTCTGAACTCCAGTCACCGAGAGTTATCTCGTATGCCGTCTTCTGCTTG	d__Bacteria	0.728934
GGAAAGAGTATTAGATACCCTAGTAGTCCATGACGAGATCGGAAGAGCACACGTCTGACTCCAGTCACCGAGAGTTATCTCGTATGCCGTCTTCTGCTTG	d__Bacteria	0.797947
GGAAAGAGTATTAGATACCCTGGTAGTCCATGACGAATCGGAAGAGCACACGTCTGAACTCCAGTCACCGAGAGTTATCTCGTATGCCGTCTTCTGCTTG	d__Bacteria	0.808684
GGAAAGAGTATTAGATACCCTGGTAGTCCATGACGAGACAGAAGAGCACACGTCTGAACTCCAGTCACGTCTGCTAATCTCGTATGCCGTCTTCTGCTTG	d__Bacteria	0.72175
GGAAAGAGTATTAGATACCCTGGTAGTCCATGACGAGATCGGAAAGCACACGTCTGAACTCCAGTCACGTCTATGAATCTCGTATGCCGTCTTCTGCTTG	d__Bacteria	0.81746
GGAAAGAGTATTAGATACCCTGGTAGTCCATGACGAGATCGGAAGGCACACGTCTGAACTCCAGTCACGTCTATGAATCTCGTATGCCGTCTTCTGCTTG	d__Bacteria	0.852922
GGAAAGAGTATTAGATACCCTGGTAGTCCATGACGAGATGGAAGAGCACACGTCTGAACTCCAGTCACGTCTATGAATCTCGTATGCCGTCTTCTGCTTG	d__Bacteria	0.818969
GGAAAGAGTATTAGATACCCTTGTAGTCCATGACGAGACGGAAGAGCACACGTCTGAACTCCAGTCACCGAGAGTTATCTCGTATGCCGTCTTCTGCTTG	d__Bacteria	0.75954
GGAAAGAGTATTAGATACCCTTGTAGTCCATGACGAGATCGGAAAGCACACGTCTGAACTCCAGTCACCGAGAGTTATCTCGTATGCCGTCTTCTGCTTG	d__Bacteria	0.757811
GGAAAGAGTATTAGATACCCTTGTAGTCCATGACGAGATCGGAAGAGCACACGTCTGACTCCAGTCACGTCTATGAATCTCGTATGCCGTCTTCTGCTTG	d__Bacteria	0.886914
GGAAAGAGTATTAGATACCCTTGTAGTCCATGACGAGATCGGAGAGCACACGTCTGAACTCCAGTCACCGAGAGTTATCTCGTATGCCGTCTTCTGCTTG	d__Bacteria	0.779449
GGAAAGAGTGATTAGAAACCCCAGTAGTCAATGACGAGATCGGAAGAGCACACGTTGAACTCCAGTCACGACATAGTATCTCGTATGCCGTCTTCTGCTT	d__Bacteria	0.787579
GGAAAGAGTGATTAGAAACCCCAGTAGTCCATGACGAGATCGGAAAGCACACGTCTGAACTCCAGTCACCGAGCGACATCTCGTATGCCGTCTTCTGCTT	d__Bacteria	0.712192
GGAAAGAGTGATTAGAAACCCCAGTAGTCCATGACGAGATCGGAAGAACACACGTCTGAACTCAGTCACCGAGAGTTATCTCGTATGCCGTCTTCTGCTT	d__Bacteria	0.750178
GGAAAGAGTGATTAGAAACCCCAGTAGTCCATGACGAGATCGGAAGAGCACACGCTGAACTCCAGTCACCGAGCGACATCTCGTATGCCGTCTTCTGCTT	d__Bacteria	0.815508
GGAAAGAGTGATTAGAAACCCCAGTAGTCCATGACGAGATCGGAAGAGCACACGTCTGAACCCAGTCACCGAGAGTTATCTCGTATGCCGTCTTCTGCTT	d__Bacteria	0.714726
GGAAAGAGTGATTAGAAACCCCAGTAGTCCATGACGAGATCGGAAGAGCACACGTCTGAACTCAGTCACCGAGAGTTATCTCGTATGCCGTCTTCTGCTT	d__Bacteria	0.704067
GGAAAGAGTGATTAGAAACCCCAGTAGTCCATGACGAGATCGGAAGAGCACACGTCTGAATCCAGTCACGTCTATGAATCTCGTATGCCGTCTTCTGCTT	d__Bacteria	0.758199
GGAAAGAGTGATTAGAAACCCCAGTAGTCCATGACGAGATCGGAAGAGCACACGTCTGACTCCAGTCACGACATAGTATCTCGTATGCCGTCTTCTGCTT	d__Bacteria	0.707697
GGAAAGAGTGATTAGAAACCCCAGTAGTCCATGACGAGATCGGAAGCACACGTCTGAACTCCAGTCACGTCTATGAATCTCGTATGCCGTCTTCTGCTTG	d__Bacteria	0.740913
GGAAAGAGTGATTAGAAACCCCGGTAGTCCATGACGAAATCGGAAGAGCACACGTCTGACTCCAGTCACGTCTGCTAATCTCGTATGCCGTCTTCTGCTT	d__Bacteria	0.779571
GGAAAGAGTGATTAGAAACCCCGGTAGTCCATGACGAATCGGAAGAGCACACGTCTGAACTCCAGTCACTAGTCTCCATCTCGTATGCCGTCTTCTGCTT	d__Bacteria	0.813226
GGAAAGAGTGATTAGAAACCCCGGTAGTCCATGACGAGACGGAAGAGCACACGTCTGAACTCCAGTCACGTCTATGAATCTCGTATGCCGTCTTCTGCTT	d__Bacteria	0.751783
GGAAAGAGTGATTAGAAACCCCGGTAGTCCATGACGAGATCGGAAAGAGCACACGTCTGAACTCCAGTCACGACATAGTATCTCGTATGCCGTCTTCTGC	d__Bacteria	0.783433
GGAAAGAGTGATTAGAAACCCCGGTAGTCCATGACGAGATCGGAAAGCACACGTCTGAACTCCAGTCACGTCTATGAATCTCGTATGCCGTCTTCTGCTT	d__Bacteria	0.765598
GGAAAGAGTGATTAGAAACCCCGGTAGTCCATGACGAGATCGGAAGAAGCACACGTCTGAACTCCAGTCACCGAGAGTTATCTCGTATGCCGTCTTCTGC	d__Bacteria	0.73307
GGAAAGAGTGATTAGAAACCCCGGTAGTCCATGACGAGATCGGAAGACACACGTCTGAACTCCAGTCACCGAGAGTTATCTCGTATGCCGTCTTCTGCTT	d__Bacteria	0.701171
GGAAAGAGTGATTAGAAACCCCGGTAGTCCATGACGAGATCGGAAGACACACGTCTGAACTCCAGTCACGACATAGTATCTCGTATGCCGTCTTCTGCTT	d__Bacteria	0.744747
GGAAAGAGTGATTAGAAACCCCGGTAGTCCATGACGAGATCGGAAGAGCACACGTCTAACTCCAGTCACCGAGAGTTATCTCGTATGCCGTCTTCTGCTT	d__Bacteria	0.781887
GGAAAGAGTGATTAGAAACCCCGGTAGTCCATGACGAGATCGGAAGAGCACACGTCTGAACCCAGTCACGACATAGTATCTCGTATGCCGTCTTCTGCTT	d__Bacteria	0.814176
GGAAAGAGTGATTAGAAACCCCGGTAGTCCATGACGAGATCGGAAGAGCACACGTCTGAATCCAGTCACCGAGAGTTATCTCGTATGCCGTCTTCTGCTT	d__Bacteria	0.734517
[truncated: 47,282 more rows]
