# Supplementary material for: Humanization of wildlife gut microbiota in urban environments
Source: eLife. 2022 May 31;11:e76381. doi: 10.7554/eLife.76381 (PMC9203057; doi:10.7554/eLife.76381)
Supplement: Supplementary file 4. [file elife-76381-supp4.xlsx]

## Sheet: Sheet1
Table S4. Statistics for pairwise beta-diversity comparisons based on Sorensen-Dice.
Group 1	Group 2	t statistic Sorensen-Dice	Parametric p-value	Parametric p-value (Bonferroni-corrected)	Nonparametric p-value
All within population	All between population	-325.615	0	0	0.001
All between population	Coyote (Rural) vs. Coyote (Rural)	63.7616	0	0	0.001
All within population	Coyote (Rural) vs. Coyote (Rural)	-1.73587	0.0825945	1	0.076
Malawi (Rural) vs. Malawi (Rural)	Coyote (Rural) vs. Coyote (Rural)	-8.513	2.74255e-17	5.02874e-13	0.001
Maricao (Rural) (non-cristatellus)noncristatellus vs. Maricao (Rural) (non-cristatellus)noncristatellus	Coyote (Rural) vs. Coyote (Rural)	5.12794	3.24664e-07	0.00595304	0.001
Maricao (Rural) vs. Maricao (Rural)	Coyote (Rural) vs. Coyote (Rural)	11.7428	0	0	0.001
Ngoantet (Rural) vs. Ngoantet (Rural)	Coyote (Rural) vs. Coyote (Rural)	-3.56451	0.000368472	1	0.001
Sparrow (Rural) vs. Sparrow (Rural)	Coyote (Rural) vs. Coyote (Rural)	27.1313	0	0	0.001
Tibet (Semi-Urban) vs. Tibet (Semi-Urban)	Coyote (Rural) vs. Coyote (Rural)	0.115618	0.907973	1	0.902
USA (Urban) vs. USA (Urban)	Coyote (Rural) vs. Coyote (Rural)	-7.58474	3.43801e-14	6.30393e-10	0.001
Yaounde (Urban) vs. Yaounde (Urban)	Coyote (Rural) vs. Coyote (Rural)	0.0358864	0.971377	1	0.977
All between population	Coyote (Rural) vs. Coyote (Urban)	32.0189	0	0	0.001
All within population	Coyote (Rural) vs. Coyote (Urban)	-12.3635	4.8448e-35	8.88343e-31	0.001
Coyote (Rural) vs. Coyote (Rural)	Coyote (Rural) vs. Coyote (Urban)	-7.15137	1.23357e-12	2.26187e-08	0.001
Coyote (Urban) vs. Coyote (Urban)	Coyote (Rural) vs. Coyote (Urban)	0.599372	0.549166	1	0.564
Malawi (Rural) vs. Coyote (Rural)	Coyote (Rural) vs. Coyote (Urban)	108.139	0	0	0.001
Malawi (Rural) vs. Coyote (Urban)	Coyote (Rural) vs. Coyote (Urban)	36.2558	0	0	0.001
Malawi (Rural) vs. Malawi (Rural)	Coyote (Rural) vs. Coyote (Urban)	-16.4203	7.5065e-57	1.37639e-52	0.001
Malawi (Rural) vs. Maricao (Rural)	Coyote (Rural) vs. Coyote (Urban)	97.913	0	0	0.001
Malawi (Rural) vs. Mayaguez (Urban)	Coyote (Rural) vs. Coyote (Urban)	52.7514	0	0	0.001
Malawi (Rural) vs. Mbalmayo (Semi-Urban)	Coyote (Rural) vs. Coyote (Urban)	-5.89049	4.65606e-09	8.53735e-05	0.001
Malawi (Rural) vs. all	Coyote (Rural) vs. Coyote (Urban)	3.42522	0.000648471	1	0.001
Malawi (Rural) vs. all	Coyote (Rural) vs. Coyote (Urban)	21.0114	0	0	0.001
Malawi (Rural) vs. Sparrow (Rural)	Coyote (Rural) vs. Coyote (Urban)	81.8706	0	0	0.001
Malawi (Rural) vs. Sparrow (Urban)	Coyote (Rural) vs. Coyote (Urban)	116.346	0	0	0.001
Malawi (Rural) vs. Tibet (Rural)	Coyote (Rural) vs. Coyote (Urban)	2.08441	0.0373899	1	0.033
Malawi (Rural) vs. Tibet (Semi-Urban)	Coyote (Rural) vs. Coyote (Urban)	5.67852	1.80495e-08	0.000330955	0.001
Malawi (Rural) vs. Tibet (Urban)	Coyote (Rural) vs. Coyote (Urban)	10.8608	0	0	0.001
Malawi (Rural) vs. USA (Urban)	Coyote (Rural) vs. Coyote (Urban)	33.975	0	0	0.001
Malawi (Rural) vs. Venezuela (Rural)	Coyote (Rural) vs. Coyote (Urban)	-8.98331	4.96273e-19	9.09967e-15	0.001
Malawi (Rural) vs. Yaounde (Urban)	Coyote (Rural) vs. Coyote (Urban)	-0.854523	0.392913	1	0.405
Maricao (Rural) (non-cristatellus)noncristatellus vs. Coyote (Rural)	Coyote (Rural) vs. Coyote (Urban)	92.7372	0	0	0.001
Maricao (Rural) (non-cristatellus)noncristatellus vs. Coyote (Urban)	Coyote (Rural) vs. Coyote (Urban)	40.3001	0	0	0.001
Maricao (Rural) (non-cristatellus)noncristatellus vs. Malawi (Rural)	Coyote (Rural) vs. Coyote (Urban)	94.1499	0	0	0.001
Maricao (Rural) (non-cristatellus)noncristatellus vs. Maricao (Rural)	Coyote (Rural) vs. Coyote (Urban)	7.68951	2.57572e-14	4.72284e-10	0.001
Maricao (Rural) (non-cristatellus)noncristatellus vs. Maricao (Rural) (non-cristatellus)noncristatellus	Coyote (Rural) vs. Coyote (Urban)	-2.05195	0.0404388	1	0.036
Maricao (Rural) (non-cristatellus)noncristatellus vs. Mayaguez (Urban)	Coyote (Rural) vs. Coyote (Urban)	9.34975	0	0	0.001
Maricao (Rural) (non-cristatellus)noncristatellus vs. Mbalmayo (Semi-Urban)	Coyote (Rural) vs. Coyote (Urban)	57.6548	0	0	0.001
Maricao (Rural) (non-cristatellus)noncristatellus vs. all	Coyote (Rural) vs. Coyote (Urban)	25.2066	0	0	0.001
Maricao (Rural) (non-cristatellus)noncristatellus vs. all	Coyote (Rural) vs. Coyote (Urban)	59.8841	0	0	0.001
Maricao (Rural) (non-cristatellus)noncristatellus vs. Sparrow (Rural)	Coyote (Rural) vs. Coyote (Urban)	62.5787	0	0	0.001
Maricao (Rural) (non-cristatellus)noncristatellus vs. Sparrow (Urban)	Coyote (Rural) vs. Coyote (Urban)	89.2498	0	0	0.001
Maricao (Rural) (non-cristatellus)noncristatellus vs. Tibet (Rural)	Coyote (Rural) vs. Coyote (Urban)	36.2966	0	0	0.001
Maricao (Rural) (non-cristatellus)noncristatellus vs. Tibet (Semi-Urban)	Coyote (Rural) vs. Coyote (Urban)	35.6874	0	0	0.001
Maricao (Rural) (non-cristatellus)noncristatellus vs. Tibet (Urban)	Coyote (Rural) vs. Coyote (Urban)	35.4463	0	0	0.001
Maricao (Rural) (non-cristatellus)noncristatellus vs. USA (Urban)	Coyote (Rural) vs. Coyote (Urban)	176.236	0	0	0.001
Maricao (Rural) (non-cristatellus)noncristatellus vs. Venezuela (Rural)	Coyote (Rural) vs. Coyote (Urban)	78.5802	0	0	0.001
Maricao (Rural) (non-cristatellus)noncristatellus vs. Yaounde (Urban)	Coyote (Rural) vs. Coyote (Urban)	65.8779	0	0	0.001
Maricao (Rural) vs. Coyote (Rural)	Coyote (Rural) vs. Coyote (Urban)	96.3513	0	0	0.001
Maricao (Rural) vs. Coyote (Urban)	Coyote (Rural) vs. Coyote (Urban)	41.959	0	0	0.001
Maricao (Rural) vs. Maricao (Rural)	Coyote (Rural) vs. Coyote (Urban)	3.03807	0.00243826	1	0.003
Maricao (Rural) vs. Mayaguez (Urban)	Coyote (Rural) vs. Coyote (Urban)	5.0595	5.14289e-07	0.00943	0.001
Maricao (Rural) vs. Mbalmayo (Semi-Urban)	Coyote (Rural) vs. Coyote (Urban)	59.9528	0	0	0.001
Maricao (Rural) vs. all	Coyote (Rural) vs. Coyote (Urban)	26.2638	0	0	0.001
Maricao (Rural) vs. all	Coyote (Rural) vs. Coyote (Urban)	62.0845	0	0	0.001
Maricao (Rural) vs. Sparrow (Urban)	Coyote (Rural) vs. Coyote (Urban)	93.442	0	0	0.001
Maricao (Rural) vs. Tibet (Rural)	Coyote (Rural) vs. Coyote (Urban)	37.896	0	0	0.001
Maricao (Rural) vs. Tibet (Semi-Urban)	Coyote (Rural) vs. Coyote (Urban)	37.1836	0	0	0.001
Maricao (Rural) vs. Tibet (Urban)	Coyote (Rural) vs. Coyote (Urban)	36.9546	0	0	0.001
Maricao (Rural) vs. USA (Urban)	Coyote (Rural) vs. Coyote (Urban)	180.416	0	0	0.001
Maricao (Rural) vs. Venezuela (Rural)	Coyote (Rural) vs. Coyote (Urban)	81.7369	0	0	0.001
Maricao (Rural) vs. Yaounde (Urban)	Coyote (Rural) vs. Coyote (Urban)	68.2784	0	0	0.001
Mayaguez (Urban) vs. Mayaguez (Urban)	Coyote (Rural) vs. Coyote (Urban)	0.793702	0.427703	1	0.424
Mbalmayo (Semi-Urban) vs. Mbalmayo (Semi-Urban)	Coyote (Rural) vs. Coyote (Urban)	-7.23488	1.18386e-12	2.17072e-08	0.001
Ngoantet (Rural) vs. Coyote (Rural)	Coyote (Rural) vs. Coyote (Urban)	121.102	0	0	0.001
Ngoantet (Rural) vs. Coyote (Urban)	Coyote (Rural) vs. Coyote (Urban)	40.9314	0	0	0.001
Ngoantet (Rural) vs. Malawi (Rural)	Coyote (Rural) vs. Coyote (Urban)	-7.85587	4.87825e-15	8.94477e-11	0.001
Ngoantet (Rural) vs. Maricao (Rural)	Coyote (Rural) vs. Coyote (Urban)	114.881	0	0	0.001
Ngoantet (Rural) vs. Maricao (Rural) (non-cristatellus)noncristatellus	Coyote (Rural) vs. Coyote (Urban)	110.898	0	0	0.001
Ngoantet (Rural) vs. Mayaguez (Urban)	Coyote (Rural) vs. Coyote (Urban)	61.9126	0	0	0.001
Ngoantet (Rural) vs. Mbalmayo (Semi-Urban)	Coyote (Rural) vs. Coyote (Urban)	-11.9486	6.56002e-32	1.20285e-27	0.001
Ngoantet (Rural) vs. all	Coyote (Rural) vs. Coyote (Urban)	2.21269	0.0271907	1	0.026
Ngoantet (Rural) vs. all	Coyote (Rural) vs. Coyote (Urban)	20.8934	0	0	0.001
Ngoantet (Rural) vs. Ngoantet (Rural)	Coyote (Rural) vs. Coyote (Urban)	-14.0228	1.63938e-43	3.00596e-39	0.001
Ngoantet (Rural) vs. Sparrow (Rural)	Coyote (Rural) vs. Coyote (Urban)	97.4972	0	0	0.001
Ngoantet (Rural) vs. Sparrow (Urban)	Coyote (Rural) vs. Coyote (Urban)	138.167	0	0	0.001
Ngoantet (Rural) vs. Tibet (Rural)	Coyote (Rural) vs. Coyote (Urban)	-0.433341	0.664849	1	0.674
Ngoantet (Rural) vs. Tibet (Semi-Urban)	Coyote (Rural) vs. Coyote (Urban)	4.12823	3.92153e-05	0.719052	0.001
Ngoantet (Rural) vs. Tibet (Urban)	Coyote (Rural) vs. Coyote (Urban)	10.6518	0	0	0.001
Ngoantet (Rural) vs. USA (Urban)	Coyote (Rural) vs. Coyote (Urban)	34.6342	0	0	0.001
Ngoantet (Rural) vs. Venezuela (Rural)	Coyote (Rural) vs. Coyote (Urban)	-4.1937	2.81282e-05	0.515758	0.001
Ngoantet (Rural) vs. Yaounde (Urban)	Coyote (Rural) vs. Coyote (Urban)	-5.72926	1.11691e-08	0.000204797	0.001
Sparrow (Rural) vs. Coyote (Rural)	Coyote (Rural) vs. Coyote (Urban)	77.4481	0	0	0.001
Sparrow (Rural) vs. Coyote (Urban)	Coyote (Rural) vs. Coyote (Urban)	34.4845	0	0	0.001
Sparrow (Rural) vs. Maricao (Rural)	Coyote (Rural) vs. Coyote (Urban)	65.498	0	0	0.001
Sparrow (Rural) vs. Mayaguez (Urban)	Coyote (Rural) vs. Coyote (Urban)	35.3711	0	0	0.001
Sparrow (Rural) vs. Mbalmayo (Semi-Urban)	Coyote (Rural) vs. Coyote (Urban)	50.7702	0	0	0.001
Sparrow (Rural) vs. all	Coyote (Rural) vs. Coyote (Urban)	22.1302	0	0	0.001
Sparrow (Rural) vs. all	Coyote (Rural) vs. Coyote (Urban)	55.2757	0	0	0.001
Sparrow (Rural) vs. Sparrow (Rural)	Coyote (Rural) vs. Coyote (Urban)	19.255	0	0	0.001
Sparrow (Rural) vs. Sparrow (Urban)	Coyote (Rural) vs. Coyote (Urban)	45.443	0	0	0.001
Sparrow (Rural) vs. Tibet (Rural)	Coyote (Rural) vs. Coyote (Urban)	31.6233	0	0	0.001
Sparrow (Rural) vs. Tibet (Semi-Urban)	Coyote (Rural) vs. Coyote (Urban)	31.5813	0	0	0.001
Sparrow (Rural) vs. Tibet (Urban)	Coyote (Rural) vs. Coyote (Urban)	30.9536	0	0	0.001
Sparrow (Rural) vs. USA (Urban)	Coyote (Rural) vs. Coyote (Urban)	164.878	0	0	0.001
Sparrow (Rural) vs. Venezuela (Rural)	Coyote (Rural) vs. Coyote (Urban)	67.9822	0	0	0.001
Sparrow (Rural) vs. Yaounde (Urban)	Coyote (Rural) vs. Coyote (Urban)	59.4615	0	0	0.001
Sparrow (Urban) vs. Sparrow (Urban)	Coyote (Rural) vs. Coyote (Urban)	47.162	0	0	0.001
Tibet (Rural) vs. Tibet (Rural)	Coyote (Rural) vs. Coyote (Urban)	-6.7577	3.60532e-11	6.61071e-07	0.001
Tibet (Semi-Urban) vs. Coyote (Rural)	Coyote (Rural) vs. Coyote (Urban)	41.2049	0	0	0.001
Tibet (Semi-Urban) vs. Coyote (Urban)	Coyote (Rural) vs. Coyote (Urban)	15.6463	0	0	0.001
Tibet (Semi-Urban) vs. Mayaguez (Urban)	Coyote (Rural) vs. Coyote (Urban)	19.8627	0	0	0.001
Tibet (Semi-Urban) vs. Mbalmayo (Semi-Urban)	Coyote (Rural) vs. Coyote (Urban)	0.0988893	0.921255	1	0.929
Tibet (Semi-Urban) vs. all	Coyote (Rural) vs. Coyote (Urban)	-0.31442	0.753321	1	0.731
Tibet (Semi-Urban) vs. all	Coyote (Rural) vs. Coyote (Urban)	5.31379	1.43884e-07	0.00263826	0.001
Tibet (Semi-Urban) vs. Sparrow (Urban)	Coyote (Rural) vs. Coyote (Urban)	45.0163	0	0	0.001
Tibet (Semi-Urban) vs. Tibet (Rural)	Coyote (Rural) vs. Coyote (Urban)	-3.72909	0.000210963	1	0.001
Tibet (Semi-Urban) vs. Tibet (Semi-Urban)	Coyote (Rural) vs. Coyote (Urban)	-1.72937	0.0843086	1	0.095
Tibet (Semi-Urban) vs. Tibet (Urban)	Coyote (Rural) vs. Coyote (Urban)	-0.839908	0.401305	1	0.406
Tibet (Semi-Urban) vs. USA (Urban)	Coyote (Rural) vs. Coyote (Urban)	12.3202	0	0	0.001
Tibet (Semi-Urban) vs. Venezuela (Rural)	Coyote (Rural) vs. Coyote (Urban)	3.57027	0.00037731	1	0.001
Tibet (Semi-Urban) vs. Yaounde (Urban)	Coyote (Rural) vs. Coyote (Urban)	0.204723	0.837844	1	0.838
Tibet (Urban) vs. Tibet (Urban)	Coyote (Rural) vs. Coyote (Urban)	-0.808258	0.419294	1	0.426
USA (Urban) vs. Coyote (Rural)	Coyote (Rural) vs. Coyote (Urban)	140.077	0	0	0.001
USA (Urban) vs. Coyote (Urban)	Coyote (Rural) vs. Coyote (Urban)	61.7184	0	0	0.001
USA (Urban) vs. Mayaguez (Urban)	Coyote (Rural) vs. Coyote (Urban)	98.5189	0	0	0.001
USA (Urban) vs. Mbalmayo (Semi-Urban)	Coyote (Rural) vs. Coyote (Urban)	20.9983	0	0	0.001
USA (Urban) vs. all	Coyote (Rural) vs. Coyote (Urban)	11.7466	0	0	0.001
USA (Urban) vs. all	Coyote (Rural) vs. Coyote (Urban)	0.116088	0.907587	1	0.911
USA (Urban) vs. Sparrow (Urban)	Coyote (Rural) vs. Coyote (Urban)	230.961	0	0	0.001
USA (Urban) vs. Tibet (Rural)	Coyote (Rural) vs. Coyote (Urban)	15.9972	0	0	0.001
USA (Urban) vs. Tibet (Urban)	Coyote (Rural) vs. Coyote (Urban)	9.2352	0	0	0.001
USA (Urban) vs. USA (Urban)	Coyote (Rural) vs. Coyote (Urban)	-18.5825	1.37258e-76	2.51676e-72	0.001
USA (Urban) vs. Venezuela (Rural)	Coyote (Rural) vs. Coyote (Urban)	28.3905	0	0	0.001
Venezuela (Rural) vs. Venezuela (Rural)	Coyote (Rural) vs. Coyote (Urban)	-13.1708	3.85952e-37	7.07681e-33	0.001
Yaounde (Urban) vs. Coyote (Rural)	Coyote (Rural) vs. Coyote (Urban)	74.0538	0	0	0.001
Yaounde (Urban) vs. Coyote (Urban)	Coyote (Rural) vs. Coyote (Urban)	27.1762	0	0	0.001
Yaounde (Urban) vs. Mayaguez (Urban)	Coyote (Rural) vs. Coyote (Urban)	36.4782	0	0	0.001
Yaounde (Urban) vs. Mbalmayo (Semi-Urban)	Coyote (Rural) vs. Coyote (Urban)	-7.75849	1.91674e-14	3.51453e-10	0.001
Yaounde (Urban) vs. all	Coyote (Rural) vs. Coyote (Urban)	-0.0505406	0.959707	1	0.953
Yaounde (Urban) vs. all	Coyote (Rural) vs. Coyote (Urban)	7.07136	2.58371e-12	4.73749e-08	0.001
Yaounde (Urban) vs. Sparrow (Urban)	Coyote (Rural) vs. Coyote (Urban)	84.4788	0	0	0.001
Yaounde (Urban) vs. Tibet (Rural)	Coyote (Rural) vs. Coyote (Urban)	-2.82406	0.00486781	1	0.003
Yaounde (Urban) vs. Tibet (Urban)	Coyote (Rural) vs. Coyote (Urban)	3.07785	0.00216094	1	0.002
Yaounde (Urban) vs. USA (Urban)	Coyote (Rural) vs. Coyote (Urban)	14.7896	0	0	0.001
Yaounde (Urban) vs. Venezuela (Rural)	Coyote (Rural) vs. Coyote (Urban)	-2.01949	0.043601	1	0.059
Yaounde (Urban) vs. Yaounde (Urban)	Coyote (Rural) vs. Coyote (Urban)	-6.19091	8.98538e-10	1.64756e-05	0.001
All between population	Coyote (Rural) vs. Mayaguez (Urban)	-19.5474	5.14723e-85	9.43797e-81	0.001
All within population	Coyote (Rural) vs. Mayaguez (Urban)	-86.4553	0	0	0.001
Coyote (Rural) vs. Coyote (Rural)	Coyote (Rural) vs. Mayaguez (Urban)	-64.448	0	0	0.001
Coyote (Rural) vs. Coyote (Urban)	Coyote (Rural) vs. Mayaguez (Urban)	-51.3187	5.14753e-287	9.4385e-283	0.001
Coyote (Rural) vs. Mbalmayo (Semi-Urban)	Coyote (Rural) vs. Mayaguez (Urban)	-15.0403	6.14135e-48	1.12608e-43	0.001
Coyote (Rural) vs. Sparrow (Urban)	Coyote (Rural) vs. Mayaguez (Urban)	2.60386	0.0092642	1	0.014
Coyote (Rural) vs. Venezuela (Rural)	Coyote (Rural) vs. Mayaguez (Urban)	-18.5191	7.65081e-72	1.40285e-67	0.001
Coyote (Urban) vs. Coyote (Urban)	Coyote (Rural) vs. Mayaguez (Urban)	-41.7704	1.30754e-174	2.39751e-170	0.001
Malawi (Rural) vs. Coyote (Rural)	Coyote (Rural) vs. Mayaguez (Urban)	-13.0178	8.01896e-38	1.47036e-33	0.001
Malawi (Rural) vs. Coyote (Urban)	Coyote (Rural) vs. Mayaguez (Urban)	-13.5955	6.43526e-39	1.17997e-34	0.001
Malawi (Rural) vs. Malawi (Rural)	Coyote (Rural) vs. Mayaguez (Urban)	-114.455	0	0	0.001
Malawi (Rural) vs. Maricao (Rural)	Coyote (Rural) vs. Mayaguez (Urban)	10.8502	0	0	0.001
Malawi (Rural) vs. Mayaguez (Urban)	Coyote (Rural) vs. Mayaguez (Urban)	2.86601	0.00423917	1	0.003
Malawi (Rural) vs. Mbalmayo (Semi-Urban)	Coyote (Rural) vs. Mayaguez (Urban)	-116.609	0	0	0.001
Malawi (Rural) vs. all	Coyote (Rural) vs. Mayaguez (Urban)	-82.2119	0	0	0.001
Malawi (Rural) vs. all	Coyote (Rural) vs. Mayaguez (Urban)	-70.0714	0	0	0.001
Malawi (Rural) vs. Sparrow (Rural)	Coyote (Rural) vs. Mayaguez (Urban)	20.1375	0	0	0.001
Malawi (Rural) vs. Sparrow (Urban)	Coyote (Rural) vs. Mayaguez (Urban)	21.6203	0	0	0.001
Malawi (Rural) vs. Tibet (Rural)	Coyote (Rural) vs. Mayaguez (Urban)	-138.475	0	0	0.001
Malawi (Rural) vs. Tibet (Semi-Urban)	Coyote (Rural) vs. Mayaguez (Urban)	-97.8572	0	0	0.001
Malawi (Rural) vs. Tibet (Urban)	Coyote (Rural) vs. Mayaguez (Urban)	-101.375	0	0	0.001
Malawi (Rural) vs. USA (Urban)	Coyote (Rural) vs. Mayaguez (Urban)	-67.3995	0	0	0.001
Malawi (Rural) vs. Venezuela (Rural)	Coyote (Rural) vs. Mayaguez (Urban)	-103.534	0	0	0.001
Malawi (Rural) vs. Yaounde (Urban)	Coyote (Rural) vs. Mayaguez (Urban)	-93.7741	0	0	0.001
Maricao (Rural) (non-cristatellus)noncristatellus vs. Coyote (Rural)	Coyote (Rural) vs. Mayaguez (Urban)	17.3507	0	0	0.001
Maricao (Rural) (non-cristatellus)noncristatellus vs. Coyote (Urban)	Coyote (Rural) vs. Mayaguez (Urban)	5.25899	1.84531e-07	0.00338356	0.001
Maricao (Rural) (non-cristatellus)noncristatellus vs. Malawi (Rural)	Coyote (Rural) vs. Mayaguez (Urban)	15.3414	0	0	0.001
Maricao (Rural) (non-cristatellus)noncristatellus vs. Maricao (Rural)	Coyote (Rural) vs. Mayaguez (Urban)	-70.8689	0	0	0.001
Maricao (Rural) (non-cristatellus)noncristatellus vs. Maricao (Rural) (non-cristatellus)noncristatellus	Coyote (Rural) vs. Mayaguez (Urban)	-82.0327	0	0	0.001
Maricao (Rural) (non-cristatellus)noncristatellus vs. Mayaguez (Urban)	Coyote (Rural) vs. Mayaguez (Urban)	-81.4829	0	0	0.001
Maricao (Rural) (non-cristatellus)noncristatellus vs. Mbalmayo (Semi-Urban)	Coyote (Rural) vs. Mayaguez (Urban)	1.09508	0.273706	1	0.266
Maricao (Rural) (non-cristatellus)noncristatellus vs. all	Coyote (Rural) vs. Mayaguez (Urban)	0.616353	0.53788	1	0.557
Maricao (Rural) (non-cristatellus)noncristatellus vs. all	Coyote (Rural) vs. Mayaguez (Urban)	-11.0967	2.28984e-27	4.19864e-23	0.001
Maricao (Rural) (non-cristatellus)noncristatellus vs. Sparrow (Rural)	Coyote (Rural) vs. Mayaguez (Urban)	21.5022	0	0	0.001
Maricao (Rural) (non-cristatellus)noncristatellus vs. Sparrow (Urban)	Coyote (Rural) vs. Mayaguez (Urban)	26.9584	0	0	0.001
Maricao (Rural) (non-cristatellus)noncristatellus vs. Tibet (Rural)	Coyote (Rural) vs. Mayaguez (Urban)	7.21179	1.32783e-12	2.4347e-08	0.001
Maricao (Rural) (non-cristatellus)noncristatellus vs. Tibet (Semi-Urban)	Coyote (Rural) vs. Mayaguez (Urban)	1.3978	0.162579	1	0.156
Maricao (Rural) (non-cristatellus)noncristatellus vs. Tibet (Urban)	Coyote (Rural) vs. Mayaguez (Urban)	-0.900136	0.368331	1	0.369
Maricao (Rural) (non-cristatellus)noncristatellus vs. USA (Urban)	Coyote (Rural) vs. Mayaguez (Urban)	-17.0298	7.5046e-64	1.37604e-59	0.001
Maricao (Rural) (non-cristatellus)noncristatellus vs. Venezuela (Rural)	Coyote (Rural) vs. Mayaguez (Urban)	9.89187	0	0	0.001
Maricao (Rural) (non-cristatellus)noncristatellus vs. Yaounde (Urban)	Coyote (Rural) vs. Mayaguez (Urban)	-8.95784	1.01703e-18	1.86483e-14	0.001
Maricao (Rural) vs. Coyote (Rural)	Coyote (Rural) vs. Mayaguez (Urban)	12.7607	0	0	0.001
Maricao (Rural) vs. Coyote (Urban)	Coyote (Rural) vs. Mayaguez (Urban)	3.21746	0.00134181	1	0.002
Maricao (Rural) vs. Maricao (Rural)	Coyote (Rural) vs. Mayaguez (Urban)	-70.483	0	0	0.001
Maricao (Rural) vs. Mayaguez (Urban)	Coyote (Rural) vs. Mayaguez (Urban)	-92.4125	0	0	0.001
Maricao (Rural) vs. Mbalmayo (Semi-Urban)	Coyote (Rural) vs. Mayaguez (Urban)	-1.80138	0.0718879	1	0.079
Maricao (Rural) vs. all	Coyote (Rural) vs. Mayaguez (Urban)	-0.682837	0.494952	1	0.468
Maricao (Rural) vs. all	Coyote (Rural) vs. Mayaguez (Urban)	-15.2069	2.78003e-48	5.09746e-44	0.001
Maricao (Rural) vs. Sparrow (Urban)	Coyote (Rural) vs. Mayaguez (Urban)	28.141	0	0	0.001
Maricao (Rural) vs. Tibet (Rural)	Coyote (Rural) vs. Mayaguez (Urban)	6.36868	3.23344e-10	5.92884e-06	0.001
Maricao (Rural) vs. Tibet (Semi-Urban)	Coyote (Rural) vs. Mayaguez (Urban)	-0.308794	0.75756	1	0.76
Maricao (Rural) vs. Tibet (Urban)	Coyote (Rural) vs. Mayaguez (Urban)	-2.42784	0.0154115	1	0.012
Maricao (Rural) vs. USA (Urban)	Coyote (Rural) vs. Mayaguez (Urban)	-20.2578	4.28937e-89	7.86499e-85	0.001
Maricao (Rural) vs. Venezuela (Rural)	Coyote (Rural) vs. Mayaguez (Urban)	6.50444	1.00626e-10	1.84507e-06	0.001
Maricao (Rural) vs. Yaounde (Urban)	Coyote (Rural) vs. Mayaguez (Urban)	-12.5842	1.33658e-34	2.45076e-30	0.001
Mayaguez (Urban) vs. Mayaguez (Urban)	Coyote (Rural) vs. Mayaguez (Urban)	-119.891	0	0	0.001
Mbalmayo (Semi-Urban) vs. Mbalmayo (Semi-Urban)	Coyote (Rural) vs. Mayaguez (Urban)	-115.648	0	0	0.001
Ngoantet (Rural) vs. Coyote (Rural)	Coyote (Rural) vs. Mayaguez (Urban)	-16.3651	1.51953e-58	2.78622e-54	0.001
Ngoantet (Rural) vs. Coyote (Urban)	Coyote (Rural) vs. Mayaguez (Urban)	-15.6167	1.63788e-50	3.00322e-46	0.001
Ngoantet (Rural) vs. Malawi (Rural)	Coyote (Rural) vs. Mayaguez (Urban)	-110.804	0	0	0.001
Ngoantet (Rural) vs. Maricao (Rural)	Coyote (Rural) vs. Mayaguez (Urban)	-1.92602	0.0541918	1	0.043
Ngoantet (Rural) vs. Maricao (Rural) (non-cristatellus)noncristatellus	Coyote (Rural) vs. Mayaguez (Urban)	3.69298	0.000225682	1	0.001
Ngoantet (Rural) vs. Mayaguez (Urban)	Coyote (Rural) vs. Mayaguez (Urban)	-8.27587	3.1316e-16	5.74211e-12	0.001
Ngoantet (Rural) vs. Mbalmayo (Semi-Urban)	Coyote (Rural) vs. Mayaguez (Urban)	-114.618	0	0	0.001
Ngoantet (Rural) vs. all	Coyote (Rural) vs. Mayaguez (Urban)	-90.3833	0	0	0.001
Ngoantet (Rural) vs. all	Coyote (Rural) vs. Mayaguez (Urban)	-76.2271	0	0	0.001
Ngoantet (Rural) vs. Ngoantet (Rural)	Coyote (Rural) vs. Mayaguez (Urban)	-108.579	0	0	0.001
Ngoantet (Rural) vs. Sparrow (Rural)	Coyote (Rural) vs. Mayaguez (Urban)	15.8388	0	0	0.001
Ngoantet (Rural) vs. Sparrow (Urban)	Coyote (Rural) vs. Mayaguez (Urban)	15.44	0	0	0.001
Ngoantet (Rural) vs. Tibet (Rural)	Coyote (Rural) vs. Mayaguez (Urban)	-142.711	0	0	0.001
Ngoantet (Rural) vs. Tibet (Semi-Urban)	Coyote (Rural) vs. Mayaguez (Urban)	-98.7856	0	0	0.001
Ngoantet (Rural) vs. Tibet (Urban)	Coyote (Rural) vs. Mayaguez (Urban)	-109.871	0	0	0.001
Ngoantet (Rural) vs. USA (Urban)	Coyote (Rural) vs. Mayaguez (Urban)	-72.3981	0	0	0.001
Ngoantet (Rural) vs. Venezuela (Rural)	Coyote (Rural) vs. Mayaguez (Urban)	-96.1187	0	0	0.001
Ngoantet (Rural) vs. Yaounde (Urban)	Coyote (Rural) vs. Mayaguez (Urban)	-95.6001	0	0	0.001
Sparrow (Rural) vs. Coyote (Rural)	Coyote (Rural) vs. Mayaguez (Urban)	0.296123	0.767172	1	0.766
Sparrow (Rural) vs. Coyote (Urban)	Coyote (Rural) vs. Mayaguez (Urban)	2.44929	0.0145421	1	0.02
Sparrow (Rural) vs. Maricao (Rural)	Coyote (Rural) vs. Mayaguez (Urban)	21.7223	0	0	0.001
Sparrow (Rural) vs. Mayaguez (Urban)	Coyote (Rural) vs. Mayaguez (Urban)	11.3231	0	0	0.001
Sparrow (Rural) vs. Mbalmayo (Semi-Urban)	Coyote (Rural) vs. Mayaguez (Urban)	10.7829	0	0	0.001
Sparrow (Rural) vs. all	Coyote (Rural) vs. Mayaguez (Urban)	4.84828	1.58224e-06	0.029012	0.001
Sparrow (Rural) vs. all	Coyote (Rural) vs. Mayaguez (Urban)	21.7103	0	0	0.001
Sparrow (Rural) vs. Sparrow (Rural)	Coyote (Rural) vs. Mayaguez (Urban)	-67.2333	0	0	0.001
Sparrow (Rural) vs. Sparrow (Urban)	Coyote (Rural) vs. Mayaguez (Urban)	-70.354	0	0	0.001
Sparrow (Rural) vs. Tibet (Rural)	Coyote (Rural) vs. Mayaguez (Urban)	10.0649	0	0	0.001
Sparrow (Rural) vs. Tibet (Semi-Urban)	Coyote (Rural) vs. Mayaguez (Urban)	9.54747	0	0	0.001
Sparrow (Rural) vs. Tibet (Urban)	Coyote (Rural) vs. Mayaguez (Urban)	3.22728	0.00130781	1	0.002
Sparrow (Rural) vs. USA (Urban)	Coyote (Rural) vs. Mayaguez (Urban)	18.5367	0	0	0.001
Sparrow (Rural) vs. Venezuela (Rural)	Coyote (Rural) vs. Mayaguez (Urban)	10.9244	0	0	0.001
Sparrow (Rural) vs. Yaounde (Urban)	Coyote (Rural) vs. Mayaguez (Urban)	10.4089	0	0	0.001
Sparrow (Urban) vs. Sparrow (Urban)	Coyote (Rural) vs. Mayaguez (Urban)	-68.2099	0	0	0.001
Tibet (Rural) vs. Tibet (Rural)	Coyote (Rural) vs. Mayaguez (Urban)	-74.2838	1.29523e-287	2.37493e-283	0.001
Tibet (Semi-Urban) vs. Coyote (Rural)	Coyote (Rural) vs. Mayaguez (Urban)	-21.5517	6.11089e-84	1.12049e-79	0.001
Tibet (Semi-Urban) vs. Coyote (Urban)	Coyote (Rural) vs. Mayaguez (Urban)	-18.9279	5.83423e-63	1.06976e-58	0.001
Tibet (Semi-Urban) vs. Mayaguez (Urban)	Coyote (Rural) vs. Mayaguez (Urban)	-3.28661	0.00107338	1	0.001
Tibet (Semi-Urban) vs. Mbalmayo (Semi-Urban)	Coyote (Rural) vs. Mayaguez (Urban)	-95.1035	0	0	0.001
Tibet (Semi-Urban) vs. all	Coyote (Rural) vs. Mayaguez (Urban)	-84.3461	8.2805145e-317	1.51831514475e-312	0.001
Tibet (Semi-Urban) vs. all	Coyote (Rural) vs. Mayaguez (Urban)	-96.448	0	0	0.001
Tibet (Semi-Urban) vs. Sparrow (Urban)	Coyote (Rural) vs. Mayaguez (Urban)	11.9604	0	0	0.001
Tibet (Semi-Urban) vs. Tibet (Rural)	Coyote (Rural) vs. Mayaguez (Urban)	-106.297	0	0	0.001
Tibet (Semi-Urban) vs. Tibet (Semi-Urban)	Coyote (Rural) vs. Mayaguez (Urban)	-93.2411	0	0	0.001
Tibet (Semi-Urban) vs. Tibet (Urban)	Coyote (Rural) vs. Mayaguez (Urban)	-105.755	0	0	0.001
Tibet (Semi-Urban) vs. USA (Urban)	Coyote (Rural) vs. Mayaguez (Urban)	-86.9034	0	0	0.001
Tibet (Semi-Urban) vs. Venezuela (Rural)	Coyote (Rural) vs. Mayaguez (Urban)	-83.4326	0	0	0.001
Tibet (Semi-Urban) vs. Yaounde (Urban)	Coyote (Rural) vs. Mayaguez (Urban)	-99.2323	0	0	0.001
Tibet (Urban) vs. Tibet (Urban)	Coyote (Rural) vs. Mayaguez (Urban)	-69.115	3.73322e-272	6.84523e-268	0.001
USA (Urban) vs. Coyote (Rural)	Coyote (Rural) vs. Mayaguez (Urban)	-23.1823	2.03904e-116	3.73878e-112	0.001
USA (Urban) vs. Coyote (Urban)	Coyote (Rural) vs. Mayaguez (Urban)	-26.619	2.36515e-139	4.33674e-135	0.001
USA (Urban) vs. Mayaguez (Urban)	Coyote (Rural) vs. Mayaguez (Urban)	-31.9275	5.21124e-191	9.55533e-187	0.001
USA (Urban) vs. Mbalmayo (Semi-Urban)	Coyote (Rural) vs. Mayaguez (Urban)	-69.3463	0	0	0.001
USA (Urban) vs. all	Coyote (Rural) vs. Mayaguez (Urban)	-84.5369	0	0	0.001
USA (Urban) vs. all	Coyote (Rural) vs. Mayaguez (Urban)	-103.427	0	0	0.001
USA (Urban) vs. Sparrow (Urban)	Coyote (Rural) vs. Mayaguez (Urban)	16.5706	0	0	0.001
USA (Urban) vs. Tibet (Rural)	Coyote (Rural) vs. Mayaguez (Urban)	-78.6449	0	0	0.001
USA (Urban) vs. Tibet (Urban)	Coyote (Rural) vs. Mayaguez (Urban)	-87.5565	0	0	0.001
USA (Urban) vs. USA (Urban)	Coyote (Rural) vs. Mayaguez (Urban)	-110.317	0	0	0.001
USA (Urban) vs. Venezuela (Rural)	Coyote (Rural) vs. Mayaguez (Urban)	-60.642	0	0	0.001
Venezuela (Rural) vs. Venezuela (Rural)	Coyote (Rural) vs. Mayaguez (Urban)	-93.4348	0	0	0.001
Yaounde (Urban) vs. Coyote (Rural)	Coyote (Rural) vs. Mayaguez (Urban)	-21.0148	7.39644e-89	1.35621e-84	0.001
Yaounde (Urban) vs. Coyote (Urban)	Coyote (Rural) vs. Mayaguez (Urban)	-19.654	1.36524e-70	2.5033e-66	0.001
Yaounde (Urban) vs. Mayaguez (Urban)	Coyote (Rural) vs. Mayaguez (Urban)	-14.9249	1.14486e-44	2.09922e-40	0.001
Yaounde (Urban) vs. Mbalmayo (Semi-Urban)	Coyote (Rural) vs. Mayaguez (Urban)	-99.5246	0	0	0.001
Yaounde (Urban) vs. all	Coyote (Rural) vs. Mayaguez (Urban)	-89.3037	0	0	0.001
Yaounde (Urban) vs. all	Coyote (Rural) vs. Mayaguez (Urban)	-87.0586	0	0	0.001
Yaounde (Urban) vs. Sparrow (Urban)	Coyote (Rural) vs. Mayaguez (Urban)	10.2274	0	0	0.001
Yaounde (Urban) vs. Tibet (Rural)	Coyote (Rural) vs. Mayaguez (Urban)	-125.08	0	0	0.001
Yaounde (Urban) vs. Tibet (Urban)	Coyote (Rural) vs. Mayaguez (Urban)	-113.126	0	0	0.001
Yaounde (Urban) vs. USA (Urban)	Coyote (Rural) vs. Mayaguez (Urban)	-74.9176	0	0	0.001
Yaounde (Urban) vs. Venezuela (Rural)	Coyote (Rural) vs. Mayaguez (Urban)	-82.1848	0	0	0.001
Yaounde (Urban) vs. Yaounde (Urban)	Coyote (Rural) vs. Mayaguez (Urban)	-97.8001	0	0	0.001
All between population	Coyote (Rural) vs. Mbalmayo (Semi-Urban)	-24.1968	3.5719e-129	6.54944e-125	0.001
All within population	Coyote (Rural) vs. Mbalmayo (Semi-Urban)	-119.271	0	0	0.001
Coyote (Rural) vs. Coyote (Rural)	Coyote (Rural) vs. Mbalmayo (Semi-Urban)	-87.7882	0	0	0.001
Coyote (Rural) vs. Coyote (Urban)	Coyote (Rural) vs. Mbalmayo (Semi-Urban)	-68.3662	0	0	0.001
Coyote (Urban) vs. Coyote (Urban)	Coyote (Rural) vs. Mbalmayo (Semi-Urban)	-47.0007	1.40644e-268	2.57885e-264	0.001
Malawi (Rural) vs. Coyote (Rural)	Coyote (Rural) vs. Mbalmayo (Semi-Urban)	5.71476	1.18076e-08	0.000216504	0.001
Malawi (Rural) vs. Coyote (Urban)	Coyote (Rural) vs. Mbalmayo (Semi-Urban)	-12.6204	6.59629e-35	1.2095e-30	0.001
Malawi (Rural) vs. Malawi (Rural)	Coyote (Rural) vs. Mbalmayo (Semi-Urban)	-153.755	0	0	0.001
Malawi (Rural) vs. Maricao (Rural)	Coyote (Rural) vs. Mbalmayo (Semi-Urban)	35.8849	0	0	0.001
Malawi (Rural) vs. Mayaguez (Urban)	Coyote (Rural) vs. Mbalmayo (Semi-Urban)	17.6379	0	0	0.001
Malawi (Rural) vs. Mbalmayo (Semi-Urban)	Coyote (Rural) vs. Mbalmayo (Semi-Urban)	-152.16	0	0	0.001
Malawi (Rural) vs. all	Coyote (Rural) vs. Mbalmayo (Semi-Urban)	-93.0586	0	0	0.001
Malawi (Rural) vs. all	Coyote (Rural) vs. Mbalmayo (Semi-Urban)	-89.1362	0	0	0.001
Malawi (Rural) vs. Sparrow (Rural)	Coyote (Rural) vs. Mbalmayo (Semi-Urban)	36.7849	0	0	0.001
Malawi (Rural) vs. Sparrow (Urban)	Coyote (Rural) vs. Mbalmayo (Semi-Urban)	48.5988	0	0	0.001
Malawi (Rural) vs. Tibet (Rural)	Coyote (Rural) vs. Mbalmayo (Semi-Urban)	-151.951	0	0	0.001
Malawi (Rural) vs. Tibet (Semi-Urban)	Coyote (Rural) vs. Mbalmayo (Semi-Urban)	-115.21	0	0	0.001
Malawi (Rural) vs. Tibet (Urban)	Coyote (Rural) vs. Mbalmayo (Semi-Urban)	-112.431	0	0	0.001
Malawi (Rural) vs. USA (Urban)	Coyote (Rural) vs. Mbalmayo (Semi-Urban)	-88.9001	0	0	0.001
Malawi (Rural) vs. Venezuela (Rural)	Coyote (Rural) vs. Mbalmayo (Semi-Urban)	-139.561	0	0	0.001
Malawi (Rural) vs. Yaounde (Urban)	Coyote (Rural) vs. Mbalmayo (Semi-Urban)	-124.726	0	0	0.001
Maricao (Rural) (non-cristatellus)noncristatellus vs. Coyote (Rural)	Coyote (Rural) vs. Mbalmayo (Semi-Urban)	38.8639	0	0	0.001
Maricao (Rural) (non-cristatellus)noncristatellus vs. Coyote (Urban)	Coyote (Rural) vs. Mbalmayo (Semi-Urban)	15.2373	0	0	0.001
Maricao (Rural) (non-cristatellus)noncristatellus vs. Malawi (Rural)	Coyote (Rural) vs. Mbalmayo (Semi-Urban)	37.7496	0	0	0.001
Maricao (Rural) (non-cristatellus)noncristatellus vs. Maricao (Rural)	Coyote (Rural) vs. Mbalmayo (Semi-Urban)	-92.8214	0	0	0.001
Maricao (Rural) (non-cristatellus)noncristatellus vs. Maricao (Rural) (non-cristatellus)noncristatellus	Coyote (Rural) vs. Mbalmayo (Semi-Urban)	-105.161	0	0	0.001
Maricao (Rural) (non-cristatellus)noncristatellus vs. Mayaguez (Urban)	Coyote (Rural) vs. Mbalmayo (Semi-Urban)	-91.6022	0	0	0.001
Maricao (Rural) (non-cristatellus)noncristatellus vs. Mbalmayo (Semi-Urban)	Coyote (Rural) vs. Mbalmayo (Semi-Urban)	17.9349	0	0	0.001
Maricao (Rural) (non-cristatellus)noncristatellus vs. all	Coyote (Rural) vs. Mbalmayo (Semi-Urban)	8.11028	1.11022e-15	2.0357e-11	0.001
Maricao (Rural) (non-cristatellus)noncristatellus vs. all	Coyote (Rural) vs. Mbalmayo (Semi-Urban)	10.0207	0	0	0.001
Maricao (Rural) (non-cristatellus)noncristatellus vs. Sparrow (Rural)	Coyote (Rural) vs. Mbalmayo (Semi-Urban)	31.0608	0	0	0.001
Maricao (Rural) (non-cristatellus)noncristatellus vs. Sparrow (Urban)	Coyote (Rural) vs. Mbalmayo (Semi-Urban)	42.9735	0	0	0.001
Maricao (Rural) (non-cristatellus)noncristatellus vs. Tibet (Rural)	Coyote (Rural) vs. Mbalmayo (Semi-Urban)	15.0444	0	0	0.001
Maricao (Rural) (non-cristatellus)noncristatellus vs. Tibet (Semi-Urban)	Coyote (Rural) vs. Mbalmayo (Semi-Urban)	11.6693	0	0	0.001
Maricao (Rural) (non-cristatellus)noncristatellus vs. Tibet (Urban)	Coyote (Rural) vs. Mbalmayo (Semi-Urban)	10.3308	0	0	0.001
Maricao (Rural) (non-cristatellus)noncristatellus vs. USA (Urban)	Coyote (Rural) vs. Mbalmayo (Semi-Urban)	17.6855	0	0	0.001
Maricao (Rural) (non-cristatellus)noncristatellus vs. Venezuela (Rural)	Coyote (Rural) vs. Mbalmayo (Semi-Urban)	29.6048	0	0	0.001
Maricao (Rural) (non-cristatellus)noncristatellus vs. Yaounde (Urban)	Coyote (Rural) vs. Mbalmayo (Semi-Urban)	11.8472	0	0	0.001
Maricao (Rural) vs. Coyote (Rural)	Coyote (Rural) vs. Mbalmayo (Semi-Urban)	36.7033	0	0	0.001
Maricao (Rural) vs. Coyote (Urban)	Coyote (Rural) vs. Mbalmayo (Semi-Urban)	14.5929	0	0	0.001
Maricao (Rural) vs. Maricao (Rural)	Coyote (Rural) vs. Mbalmayo (Semi-Urban)	-91.0219	0	0	0.001
Maricao (Rural) vs. Mayaguez (Urban)	Coyote (Rural) vs. Mbalmayo (Semi-Urban)	-107.075	0	0	0.001
Maricao (Rural) vs. Mbalmayo (Semi-Urban)	Coyote (Rural) vs. Mbalmayo (Semi-Urban)	16.5502	0	0	0.001
Maricao (Rural) vs. all	Coyote (Rural) vs. Mbalmayo (Semi-Urban)	7.7418	2.04281e-14	3.7457e-10	0.001
Maricao (Rural) vs. all	Coyote (Rural) vs. Mbalmayo (Semi-Urban)	7.34675	2.99538e-13	5.49233e-09	0.001
Maricao (Rural) vs. Sparrow (Urban)	Coyote (Rural) vs. Mbalmayo (Semi-Urban)	44.8594	0	0	0.001
Maricao (Rural) vs. Tibet (Rural)	Coyote (Rural) vs. Mbalmayo (Semi-Urban)	15.098	0	0	0.001
Maricao (Rural) vs. Tibet (Semi-Urban)	Coyote (Rural) vs. Mbalmayo (Semi-Urban)	11.161	0	0	0.001
Maricao (Rural) vs. Tibet (Urban)	Coyote (Rural) vs. Mbalmayo (Semi-Urban)	9.8966	0	0	0.001
Maricao (Rural) vs. USA (Urban)	Coyote (Rural) vs. Mbalmayo (Semi-Urban)	11.4256	0	0	0.001
Maricao (Rural) vs. Venezuela (Rural)	Coyote (Rural) vs. Mbalmayo (Semi-Urban)	28.11	0	0	0.001
Maricao (Rural) vs. Yaounde (Urban)	Coyote (Rural) vs. Mbalmayo (Semi-Urban)	9.10497	0	0	0.001
Mayaguez (Urban) vs. Mayaguez (Urban)	Coyote (Rural) vs. Mbalmayo (Semi-Urban)	-73.1738	0	0	0.001
Mbalmayo (Semi-Urban) vs. Mbalmayo (Semi-Urban)	Coyote (Rural) vs. Mbalmayo (Semi-Urban)	-132.051	0	0	0.001
Ngoantet (Rural) vs. Coyote (Rural)	Coyote (Rural) vs. Mbalmayo (Semi-Urban)	-1.15591	0.247771	1	0.248
Ngoantet (Rural) vs. Coyote (Urban)	Coyote (Rural) vs. Mbalmayo (Semi-Urban)	-15.2494	1.40405e-49	2.57446e-45	0.001
Ngoantet (Rural) vs. Malawi (Rural)	Coyote (Rural) vs. Mbalmayo (Semi-Urban)	-150.429	0	0	0.001
Ngoantet (Rural) vs. Maricao (Rural)	Coyote (Rural) vs. Mbalmayo (Semi-Urban)	29.6829	0	0	0.001
Ngoantet (Rural) vs. Maricao (Rural) (non-cristatellus)noncristatellus	Coyote (Rural) vs. Mbalmayo (Semi-Urban)	33.8737	0	0	0.001
Ngoantet (Rural) vs. Mayaguez (Urban)	Coyote (Rural) vs. Mbalmayo (Semi-Urban)	13.196	0	0	0.001
Ngoantet (Rural) vs. Mbalmayo (Semi-Urban)	Coyote (Rural) vs. Mbalmayo (Semi-Urban)	-153.438	0	0	0.001
Ngoantet (Rural) vs. all	Coyote (Rural) vs. Mbalmayo (Semi-Urban)	-106.824	0	0	0.001
Ngoantet (Rural) vs. all	Coyote (Rural) vs. Mbalmayo (Semi-Urban)	-98.5631	0	0	0.001
Ngoantet (Rural) vs. Ngoantet (Rural)	Coyote (Rural) vs. Mbalmayo (Semi-Urban)	-147.775	0	0	0.001
Ngoantet (Rural) vs. Sparrow (Rural)	Coyote (Rural) vs. Mbalmayo (Semi-Urban)	39.2239	0	0	0.001
Ngoantet (Rural) vs. Sparrow (Urban)	Coyote (Rural) vs. Mbalmayo (Semi-Urban)	50.098	0	0	0.001
Ngoantet (Rural) vs. Tibet (Rural)	Coyote (Rural) vs. Mbalmayo (Semi-Urban)	-167.609	0	0	0.001
Ngoantet (Rural) vs. Tibet (Semi-Urban)	Coyote (Rural) vs. Mbalmayo (Semi-Urban)	-122.408	0	0	0.001
Ngoantet (Rural) vs. Tibet (Urban)	Coyote (Rural) vs. Mbalmayo (Semi-Urban)	-127.932	0	0	0.001
Ngoantet (Rural) vs. USA (Urban)	Coyote (Rural) vs. Mbalmayo (Semi-Urban)	-95.8181	0	0	0.001
Ngoantet (Rural) vs. Venezuela (Rural)	Coyote (Rural) vs. Mbalmayo (Semi-Urban)	-130.001	0	0	0.001
Ngoantet (Rural) vs. Yaounde (Urban)	Coyote (Rural) vs. Mbalmayo (Semi-Urban)	-129.021	0	0	0.001
Sparrow (Rural) vs. Coyote (Rural)	Coyote (Rural) vs. Mbalmayo (Semi-Urban)	21.4316	0	0	0.001
Sparrow (Rural) vs. Coyote (Urban)	Coyote (Rural) vs. Mbalmayo (Semi-Urban)	11.8891	0	0	0.001
Sparrow (Rural) vs. Maricao (Rural)	Coyote (Rural) vs. Mbalmayo (Semi-Urban)	32.2657	0	0	0.001
Sparrow (Rural) vs. Mayaguez (Urban)	Coyote (Rural) vs. Mbalmayo (Semi-Urban)	16.8328	0	0	0.001
Sparrow (Rural) vs. Mbalmayo (Semi-Urban)	Coyote (Rural) vs. Mbalmayo (Semi-Urban)	21.5399	0	0	0.001
Sparrow (Rural) vs. all	Coyote (Rural) vs. Mbalmayo (Semi-Urban)	9.34049	0	0	0.001
Sparrow (Rural) vs. all	Coyote (Rural) vs. Mbalmayo (Semi-Urban)	28.6043	0	0	0.001
Sparrow (Rural) vs. Sparrow (Rural)	Coyote (Rural) vs. Mbalmayo (Semi-Urban)	-60.6864	0	0	0.001
Sparrow (Rural) vs. Sparrow (Urban)	Coyote (Rural) vs. Mbalmayo (Semi-Urban)	-72.1387	0	0	0.001
Sparrow (Rural) vs. Tibet (Rural)	Coyote (Rural) vs. Mbalmayo (Semi-Urban)	14.9977	0	0	0.001
Sparrow (Rural) vs. Tibet (Semi-Urban)	Coyote (Rural) vs. Mbalmayo (Semi-Urban)	14.7571	0	0	0.001
Sparrow (Rural) vs. Tibet (Urban)	Coyote (Rural) vs. Mbalmayo (Semi-Urban)	11.2524	0	0	0.001
Sparrow (Rural) vs. USA (Urban)	Coyote (Rural) vs. Mbalmayo (Semi-Urban)	58.9285	0	0	0.001
Sparrow (Rural) vs. Venezuela (Rural)	Coyote (Rural) vs. Mbalmayo (Semi-Urban)	27.1176	0	0	0.001
Sparrow (Rural) vs. Yaounde (Urban)	Coyote (Rural) vs. Mbalmayo (Semi-Urban)	24.1357	0	0	0.001
Sparrow (Urban) vs. Sparrow (Urban)	Coyote (Rural) vs. Mbalmayo (Semi-Urban)	-68.3738	0	0	0.001
Tibet (Rural) vs. Tibet (Rural)	Coyote (Rural) vs. Mbalmayo (Semi-Urban)	-75.6726	0	0	0.001
Tibet (Semi-Urban) vs. Coyote (Rural)	Coyote (Rural) vs. Mbalmayo (Semi-Urban)	-8.05016	1.66288e-15	3.04905e-11	0.001
Tibet (Semi-Urban) vs. Coyote (Urban)	Coyote (Rural) vs. Mbalmayo (Semi-Urban)	-13.806	2.8047e-40	5.14271e-36	0.001
Tibet (Semi-Urban) vs. Mayaguez (Urban)	Coyote (Rural) vs. Mbalmayo (Semi-Urban)	4.38692	1.25331e-05	0.229807	0.001
Tibet (Semi-Urban) vs. Mbalmayo (Semi-Urban)	Coyote (Rural) vs. Mbalmayo (Semi-Urban)	-102.653	0	0	0.001
Tibet (Semi-Urban) vs. all	Coyote (Rural) vs. Mbalmayo (Semi-Urban)	-62.9134	0	0	0.001
Tibet (Semi-Urban) vs. all	Coyote (Rural) vs. Mbalmayo (Semi-Urban)	-97.2306	0	0	0.001
Tibet (Semi-Urban) vs. Sparrow (Urban)	Coyote (Rural) vs. Mbalmayo (Semi-Urban)	20.2809	0	0	0.001
Tibet (Semi-Urban) vs. Tibet (Rural)	Coyote (Rural) vs. Mbalmayo (Semi-Urban)	-95.801	0	0	0.001
Tibet (Semi-Urban) vs. Tibet (Semi-Urban)	Coyote (Rural) vs. Mbalmayo (Semi-Urban)	-67.2366	0	0	0.001
Tibet (Semi-Urban) vs. Tibet (Urban)	Coyote (Rural) vs. Mbalmayo (Semi-Urban)	-86.8983	0	0	0.001
Tibet (Semi-Urban) vs. USA (Urban)	Coyote (Rural) vs. Mbalmayo (Semi-Urban)	-113.737	0	0	0.001
Tibet (Semi-Urban) vs. Venezuela (Rural)	Coyote (Rural) vs. Mbalmayo (Semi-Urban)	-98.9627	0	0	0.001
Tibet (Semi-Urban) vs. Yaounde (Urban)	Coyote (Rural) vs. Mbalmayo (Semi-Urban)	-111.559	0	0	0.001
Tibet (Urban) vs. Tibet (Urban)	Coyote (Rural) vs. Mbalmayo (Semi-Urban)	-58.034	0	0	0.001
USA (Urban) vs. Coyote (Rural)	Coyote (Rural) vs. Mbalmayo (Semi-Urban)	-16.8513	4.81326e-63	8.82559e-59	0.001
USA (Urban) vs. Coyote (Urban)	Coyote (Rural) vs. Mbalmayo (Semi-Urban)	-28.2158	2.01038e-157	3.68624e-153	0.001
USA (Urban) vs. Mayaguez (Urban)	Coyote (Rural) vs. Mbalmayo (Semi-Urban)	-6.00726	2.08775e-09	3.8281e-05	0.001
USA (Urban) vs. Mbalmayo (Semi-Urban)	Coyote (Rural) vs. Mbalmayo (Semi-Urban)	-92.0456	0	0	0.001
USA (Urban) vs. all	Coyote (Rural) vs. Mbalmayo (Semi-Urban)	-106.85	0	0	0.001
USA (Urban) vs. all	Coyote (Rural) vs. Mbalmayo (Semi-Urban)	-140.064	0	0	0.001
USA (Urban) vs. Sparrow (Urban)	Coyote (Rural) vs. Mbalmayo (Semi-Urban)	69.0938	0	0	0.001
USA (Urban) vs. Tibet (Rural)	Coyote (Rural) vs. Mbalmayo (Semi-Urban)	-102.603	0	0	0.001
USA (Urban) vs. Tibet (Urban)	Coyote (Rural) vs. Mbalmayo (Semi-Urban)	-115.263	0	0	0.001
USA (Urban) vs. USA (Urban)	Coyote (Rural) vs. Mbalmayo (Semi-Urban)	-152.298	0	0	0.001
USA (Urban) vs. Venezuela (Rural)	Coyote (Rural) vs. Mbalmayo (Semi-Urban)	-80.1186	0	0	0.001
Venezuela (Rural) vs. Venezuela (Rural)	Coyote (Rural) vs. Mbalmayo (Semi-Urban)	-124.448	0	0	0.001
Yaounde (Urban) vs. Coyote (Rural)	Coyote (Rural) vs. Mbalmayo (Semi-Urban)	-11.022	1.21381e-27	2.22564e-23	0.001
Yaounde (Urban) vs. Coyote (Urban)	Coyote (Rural) vs. Mbalmayo (Semi-Urban)	-19.0702	3.77433e-72	6.92062e-68	0.001
Yaounde (Urban) vs. Mayaguez (Urban)	Coyote (Rural) vs. Mbalmayo (Semi-Urban)	1.31784	0.187777	1	0.201
Yaounde (Urban) vs. Mbalmayo (Semi-Urban)	Coyote (Rural) vs. Mbalmayo (Semi-Urban)	-129.024	0	0	0.001
Yaounde (Urban) vs. all	Coyote (Rural) vs. Mbalmayo (Semi-Urban)	-91.9593	0	0	0.001
Yaounde (Urban) vs. all	Coyote (Rural) vs. Mbalmayo (Semi-Urban)	-109.457	0	0	0.001
Yaounde (Urban) vs. Sparrow (Urban)	Coyote (Rural) vs. Mbalmayo (Semi-Urban)	31.5586	0	0	0.001
Yaounde (Urban) vs. Tibet (Rural)	Coyote (Rural) vs. Mbalmayo (Semi-Urban)	-134.235	0	0	0.001
Yaounde (Urban) vs. Tibet (Urban)	Coyote (Rural) vs. Mbalmayo (Semi-Urban)	-116.329	0	0	0.001
Yaounde (Urban) vs. USA (Urban)	Coyote (Rural) vs. Mbalmayo (Semi-Urban)	-100.543	0	0	0.001
Yaounde (Urban) vs. Venezuela (Rural)	Coyote (Rural) vs. Mbalmayo (Semi-Urban)	-109.327	0	0	0.001
Yaounde (Urban) vs. Yaounde (Urban)	Coyote (Rural) vs. Mbalmayo (Semi-Urban)	-123.284	0	0	0.001
All between population	Coyote (Rural) vs. all	-24.8962	1.27558e-136	2.3389e-132	0.001
All within population	Coyote (Rural) vs. all	-126.047	0	0	0.001
Coyote (Rural) vs. Coyote (Rural)	Coyote (Rural) vs. all	-92.0453	0	0	0.001
Coyote (Rural) vs. Coyote (Urban)	Coyote (Rural) vs. all	-70.9138	0	0	0.001
Coyote (Rural) vs. Mayaguez (Urban)	Coyote (Rural) vs. all	16.0196	0	0	0.001
Coyote (Rural) vs. Mbalmayo (Semi-Urban)	Coyote (Rural) vs. all	3.40563	0.000671274	1	0.001
Coyote (Rural) vs. Sparrow (Urban)	Coyote (Rural) vs. all	34.0226	0	0	0.001
Coyote (Rural) vs. Venezuela (Rural)	Coyote (Rural) vs. all	3.57589	0.000354166	1	0.001
Coyote (Urban) vs. Coyote (Urban)	Coyote (Rural) vs. all	-45.0576	3.64105e-267	6.67622e-263	0.001
Malawi (Rural) vs. Coyote (Rural)	Coyote (Rural) vs. all	10.2511	0	0	0.001
Malawi (Rural) vs. Coyote (Urban)	Coyote (Rural) vs. all	-11.6714	2.19301e-30	4.0211e-26	0.001
Malawi (Rural) vs. Malawi (Rural)	Coyote (Rural) vs. all	-159.597	0	0	0.001
Malawi (Rural) vs. Maricao (Rural)	Coyote (Rural) vs. all	36.7988	0	0	0.001
Malawi (Rural) vs. Mayaguez (Urban)	Coyote (Rural) vs. all	18.2289	0	0	0.001
Malawi (Rural) vs. Mbalmayo (Semi-Urban)	Coyote (Rural) vs. all	-155.712	0	0	0.001
Malawi (Rural) vs. all	Coyote (Rural) vs. all	-89.4721	0	0	0.001
Malawi (Rural) vs. all	Coyote (Rural) vs. all	-90.9063	0	0	0.001
Malawi (Rural) vs. Sparrow (Rural)	Coyote (Rural) vs. all	36.3841	0	0	0.001
Malawi (Rural) vs. Sparrow (Urban)	Coyote (Rural) vs. all	48.903	0	0	0.001
Malawi (Rural) vs. Tibet (Rural)	Coyote (Rural) vs. all	-144.404	0	0	0.001
Malawi (Rural) vs. Tibet (Semi-Urban)	Coyote (Rural) vs. all	-112.558	0	0	0.001
Malawi (Rural) vs. Tibet (Urban)	Coyote (Rural) vs. all	-107.453	0	0	0.001
Malawi (Rural) vs. USA (Urban)	Coyote (Rural) vs. all	-92.7931	0	0	0.001
Malawi (Rural) vs. Venezuela (Rural)	Coyote (Rural) vs. all	-145.448	0	0	0.001
Malawi (Rural) vs. Yaounde (Urban)	Coyote (Rural) vs. all	-129.229	0	0	0.001
Maricao (Rural) (non-cristatellus)noncristatellus vs. Coyote (Rural)	Coyote (Rural) vs. all	39.1229	0	0	0.001
Maricao (Rural) (non-cristatellus)noncristatellus vs. Coyote (Urban)	Coyote (Rural) vs. all	15.3993	0	0	0.001
Maricao (Rural) (non-cristatellus)noncristatellus vs. Malawi (Rural)	Coyote (Rural) vs. all	38.1016	0	0	0.001
Maricao (Rural) (non-cristatellus)noncristatellus vs. Maricao (Rural)	Coyote (Rural) vs. all	-95.65	0	0	0.001
Maricao (Rural) (non-cristatellus)noncristatellus vs. Maricao (Rural) (non-cristatellus)noncristatellus	Coyote (Rural) vs. all	-106.66	0	0	0.001
Maricao (Rural) (non-cristatellus)noncristatellus vs. Mayaguez (Urban)	Coyote (Rural) vs. all	-87.9978	0	0	0.001
Maricao (Rural) (non-cristatellus)noncristatellus vs. Mbalmayo (Semi-Urban)	Coyote (Rural) vs. all	18.8176	0	0	0.001
Maricao (Rural) (non-cristatellus)noncristatellus vs. all	Coyote (Rural) vs. all	8.40736	2.22045e-16	4.07141e-12	0.001
Maricao (Rural) (non-cristatellus)noncristatellus vs. all	Coyote (Rural) vs. all	12.2053	0	0	0.001
Maricao (Rural) (non-cristatellus)noncristatellus vs. Sparrow (Rural)	Coyote (Rural) vs. all	30.1895	0	0	0.001
Maricao (Rural) (non-cristatellus)noncristatellus vs. Sparrow (Urban)	Coyote (Rural) vs. all	42.0815	0	0	0.001
Maricao (Rural) (non-cristatellus)noncristatellus vs. Tibet (Rural)	Coyote (Rural) vs. all	14.9726	0	0	0.001
Maricao (Rural) (non-cristatellus)noncristatellus vs. Tibet (Semi-Urban)	Coyote (Rural) vs. all	12.0916	0	0	0.001
Maricao (Rural) (non-cristatellus)noncristatellus vs. Tibet (Urban)	Coyote (Rural) vs. all	10.9364	0	0	0.001
Maricao (Rural) (non-cristatellus)noncristatellus vs. USA (Urban)	Coyote (Rural) vs. all	25.0203	0	0	0.001
Maricao (Rural) (non-cristatellus)noncristatellus vs. Venezuela (Rural)	Coyote (Rural) vs. all	30.2201	0	0	0.001
Maricao (Rural) (non-cristatellus)noncristatellus vs. Yaounde (Urban)	Coyote (Rural) vs. all	14.1767	0	0	0.001
Maricao (Rural) vs. Coyote (Rural)	Coyote (Rural) vs. all	37.6184	0	0	0.001
Maricao (Rural) vs. Coyote (Urban)	Coyote (Rural) vs. all	14.9661	0	0	0.001
Maricao (Rural) vs. Maricao (Rural)	Coyote (Rural) vs. all	-92.8845	0	0	0.001
Maricao (Rural) vs. Mayaguez (Urban)	Coyote (Rural) vs. all	-103.918	0	0	0.001
Maricao (Rural) vs. Mbalmayo (Semi-Urban)	Coyote (Rural) vs. all	17.8112	0	0	0.001
Maricao (Rural) vs. all	Coyote (Rural) vs. all	8.16365	6.66134e-16	1.22142e-11	0.001
Maricao (Rural) vs. all	Coyote (Rural) vs. all	10.0272	0	0	0.001
Maricao (Rural) vs. Sparrow (Urban)	Coyote (Rural) vs. all	43.927	0	0	0.001
Maricao (Rural) vs. Tibet (Rural)	Coyote (Rural) vs. all	15.1239	0	0	0.001
Maricao (Rural) vs. Tibet (Semi-Urban)	Coyote (Rural) vs. all	11.7523	0	0	0.001
Maricao (Rural) vs. Tibet (Urban)	Coyote (Rural) vs. all	10.6643	0	0	0.001
Maricao (Rural) vs. USA (Urban)	Coyote (Rural) vs. all	18.9505	0	0	0.001
Maricao (Rural) vs. Venezuela (Rural)	Coyote (Rural) vs. all	29.1934	0	0	0.001
Maricao (Rural) vs. Yaounde (Urban)	Coyote (Rural) vs. all	11.9207	0	0	0.001
Mayaguez (Urban) vs. Mayaguez (Urban)	Coyote (Rural) vs. all	-62.5329	0	0	0.001
Mbalmayo (Semi-Urban) vs. Mbalmayo (Semi-Urban)	Coyote (Rural) vs. all	-127.057	0	0	0.001
Ngoantet (Rural) vs. Coyote (Rural)	Coyote (Rural) vs. all	3.35279	0.000805613	1	0.001
Ngoantet (Rural) vs. Coyote (Urban)	Coyote (Rural) vs. all	-14.394	8.46528e-45	1.55219e-40	0.001
Ngoantet (Rural) vs. Malawi (Rural)	Coyote (Rural) vs. all	-157.573	0	0	0.001
Ngoantet (Rural) vs. Maricao (Rural)	Coyote (Rural) vs. all	32.757	0	0	0.001
Ngoantet (Rural) vs. Maricao (Rural) (non-cristatellus)noncristatellus	Coyote (Rural) vs. all	36.0671	0	0	0.001
Ngoantet (Rural) vs. Mayaguez (Urban)	Coyote (Rural) vs. all	15.0345	0	0	0.001
Ngoantet (Rural) vs. Mbalmayo (Semi-Urban)	Coyote (Rural) vs. all	-159.128	0	0	0.001
Ngoantet (Rural) vs. all	Coyote (Rural) vs. all	-104.435	0	0	0.001
Ngoantet (Rural) vs. all	Coyote (Rural) vs. all	-101.311	0	0	0.001
Ngoantet (Rural) vs. Ngoantet (Rural)	Coyote (Rural) vs. all	-154.773	0	0	0.001
Ngoantet (Rural) vs. Sparrow (Rural)	Coyote (Rural) vs. all	39.7592	0	0	0.001
Ngoantet (Rural) vs. Sparrow (Urban)	Coyote (Rural) vs. all	52.1186	0	0	0.001
Ngoantet (Rural) vs. Tibet (Rural)	Coyote (Rural) vs. all	-163.319	0	0	0.001
Ngoantet (Rural) vs. Tibet (Semi-Urban)	Coyote (Rural) vs. all	-122.306	0	0	0.001
Ngoantet (Rural) vs. Tibet (Urban)	Coyote (Rural) vs. all	-124.551	0	0	0.001
Ngoantet (Rural) vs. USA (Urban)	Coyote (Rural) vs. all	-100.144	0	0	0.001
Ngoantet (Rural) vs. Venezuela (Rural)	Coyote (Rural) vs. all	-135.953	0	0	0.001
Ngoantet (Rural) vs. Yaounde (Urban)	Coyote (Rural) vs. all	-134.676	0	0	0.001
Sparrow (Rural) vs. Coyote (Rural)	Coyote (Rural) vs. all	23.3205	0	0	0.001
Sparrow (Rural) vs. Coyote (Urban)	Coyote (Rural) vs. all	12.2077	0	0	0.001
Sparrow (Rural) vs. Maricao (Rural)	Coyote (Rural) vs. all	31.4242	0	0	0.001
Sparrow (Rural) vs. Mayaguez (Urban)	Coyote (Rural) vs. all	16.4069	0	0	0.001
Sparrow (Rural) vs. Mbalmayo (Semi-Urban)	Coyote (Rural) vs. all	21.3984	0	0	0.001
Sparrow (Rural) vs. all	Coyote (Rural) vs. all	9.25245	0	0	0.001
Sparrow (Rural) vs. all	Coyote (Rural) vs. all	27.6101	0	0	0.001
Sparrow (Rural) vs. Sparrow (Rural)	Coyote (Rural) vs. all	-54.6451	0	0	0.001
Sparrow (Rural) vs. Sparrow (Urban)	Coyote (Rural) vs. all	-67.715	0	0	0.001
Sparrow (Rural) vs. Tibet (Rural)	Coyote (Rural) vs. all	14.6217	0	0	0.001
Sparrow (Rural) vs. Tibet (Semi-Urban)	Coyote (Rural) vs. all	14.4225	0	0	0.001
Sparrow (Rural) vs. Tibet (Urban)	Coyote (Rural) vs. all	11.4439	0	0	0.001
Sparrow (Rural) vs. USA (Urban)	Coyote (Rural) vs. all	62.0357	0	0	0.001
Sparrow (Rural) vs. Venezuela (Rural)	Coyote (Rural) vs. all	27.3536	0	0	0.001
Sparrow (Rural) vs. Yaounde (Urban)	Coyote (Rural) vs. all	24.2088	0	0	0.001
Sparrow (Urban) vs. Sparrow (Urban)	Coyote (Rural) vs. all	-63.7148	0	0	0.001
Tibet (Rural) vs. Tibet (Rural)	Coyote (Rural) vs. all	-70.1963	0	0	0.001
Tibet (Semi-Urban) vs. Coyote (Rural)	Coyote (Rural) vs. all	-4.939	8.64181e-07	0.0158456	0.001
Tibet (Semi-Urban) vs. Coyote (Urban)	Coyote (Rural) vs. all	-11.7108	3.25806e-30	5.97398e-26	0.001
Tibet (Semi-Urban) vs. Mayaguez (Urban)	Coyote (Rural) vs. all	4.93281	9.13189e-07	0.0167442	0.001
Tibet (Semi-Urban) vs. Mbalmayo (Semi-Urban)	Coyote (Rural) vs. all	-96.9885	0	0	0.001
Tibet (Semi-Urban) vs. all	Coyote (Rural) vs. all	-54.9647	0	0	0.001
Tibet (Semi-Urban) vs. all	Coyote (Rural) vs. all	-90.0592	0	0	0.001
Tibet (Semi-Urban) vs. Sparrow (Urban)	Coyote (Rural) vs. all	19.9422	0	0	0.001
Tibet (Semi-Urban) vs. Tibet (Rural)	Coyote (Rural) vs. all	-86.3874	0	0	0.001
Tibet (Semi-Urban) vs. Tibet (Semi-Urban)	Coyote (Rural) vs. all	-58.5291	0	0	0.001
Tibet (Semi-Urban) vs. Tibet (Urban)	Coyote (Rural) vs. all	-77.0212	0	0	0.001
Tibet (Semi-Urban) vs. USA (Urban)	Coyote (Rural) vs. all	-117.266	0	0	0.001
Tibet (Semi-Urban) vs. Venezuela (Rural)	Coyote (Rural) vs. all	-96.945	0	0	0.001
Tibet (Semi-Urban) vs. Yaounde (Urban)	Coyote (Rural) vs. all	-106.892	0	0	0.001
Tibet (Urban) vs. Tibet (Urban)	Coyote (Rural) vs. all	-51.6291	1.3380640896e-314	2.45347431464857e-310	0.001
USA (Urban) vs. Coyote (Rural)	Coyote (Rural) vs. all	-14.0577	1.45653e-44	2.67069e-40	0.001
USA (Urban) vs. Coyote (Urban)	Coyote (Rural) vs. all	-27.4565	1.42436e-150	2.61171e-146	0.001
USA (Urban) vs. Mayaguez (Urban)	Coyote (Rural) vs. all	-0.265802	0.790407	1	0.797
USA (Urban) vs. Mbalmayo (Semi-Urban)	Coyote (Rural) vs. all	-96.0234	0	0	0.001
USA (Urban) vs. all	Coyote (Rural) vs. all	-108.132	0	0	0.001
USA (Urban) vs. all	Coyote (Rural) vs. all	-146.78	0	0	0.001
USA (Urban) vs. Sparrow (Urban)	Coyote (Rural) vs. all	75.9504	0	0	0.001
USA (Urban) vs. Tibet (Rural)	Coyote (Rural) vs. all	-105.777	0	0	0.001
USA (Urban) vs. Tibet (Urban)	Coyote (Rural) vs. all	-119.11	0	0	0.001
USA (Urban) vs. USA (Urban)	Coyote (Rural) vs. all	-160.913	0	0	0.001
USA (Urban) vs. Venezuela (Rural)	Coyote (Rural) vs. all	-83.6447	0	0	0.001
Venezuela (Rural) vs. Venezuela (Rural)	Coyote (Rural) vs. all	-128.495	0	0	0.001
Yaounde (Urban) vs. Coyote (Rural)	Coyote (Rural) vs. all	-7.60487	3.88753e-14	7.12817e-10	0.001
Yaounde (Urban) vs. Coyote (Urban)	Coyote (Rural) vs. all	-17.7207	4.45368e-64	8.16626e-60	0.001
Yaounde (Urban) vs. Mayaguez (Urban)	Coyote (Rural) vs. all	3.3201	0.000920953	1	0.001
Yaounde (Urban) vs. Mbalmayo (Semi-Urban)	Coyote (Rural) vs. all	-131.432	0	0	0.001
Yaounde (Urban) vs. all	Coyote (Rural) vs. all	-85.6395	0	0	0.001
Yaounde (Urban) vs. all	Coyote (Rural) vs. all	-110.284	0	0	0.001
Yaounde (Urban) vs. Sparrow (Urban)	Coyote (Rural) vs. all	32.2127	0	0	0.001
Yaounde (Urban) vs. Tibet (Rural)	Coyote (Rural) vs. all	-126.545	0	0	0.001
Yaounde (Urban) vs. Tibet (Urban)	Coyote (Rural) vs. all	-108.329	0	0	0.001
Yaounde (Urban) vs. USA (Urban)	Coyote (Rural) vs. all	-105.298	0	0	0.001
Yaounde (Urban) vs. Venezuela (Rural)	Coyote (Rural) vs. all	-113.229	0	0	0.001
Yaounde (Urban) vs. Yaounde (Urban)	Coyote (Rural) vs. all	-123.806	0	0	0.001
All between population	Coyote (Rural) vs. Sparrow (Urban)	-42.8924	0	0	0.001
All within population	Coyote (Rural) vs. Sparrow (Urban)	-188.11	0	0	0.001
Coyote (Rural) vs. Coyote (Rural)	Coyote (Rural) vs. Sparrow (Urban)	-139.63	0	0	0.001
Coyote (Rural) vs. Coyote (Urban)	Coyote (Rural) vs. Sparrow (Urban)	-110.668	0	0	0.001
Coyote (Rural) vs. Mbalmayo (Semi-Urban)	Coyote (Rural) vs. Sparrow (Urban)	-31.1743	1.06207e-188	1.94741e-184	0.001
Coyote (Urban) vs. Coyote (Urban)	Coyote (Rural) vs. Sparrow (Urban)	-83.9653	0	0	0.001
Malawi (Rural) vs. Coyote (Rural)	Coyote (Rural) vs. Sparrow (Urban)	-29.2639	1.60174e-174	2.93695e-170	0.001
Malawi (Rural) vs. Coyote (Urban)	Coyote (Rural) vs. Sparrow (Urban)	-29.5757	8.43458e-169	1.54657e-164	0.001
Malawi (Rural) vs. Malawi (Rural)	Coyote (Rural) vs. Sparrow (Urban)	-246.158	0	0	0.001
Malawi (Rural) vs. Maricao (Rural)	Coyote (Rural) vs. Sparrow (Urban)	11.209	0	0	0.001
Malawi (Rural) vs. Mayaguez (Urban)	Coyote (Rural) vs. Sparrow (Urban)	0.944625	0.344927	1	0.361
Malawi (Rural) vs. Mbalmayo (Semi-Urban)	Coyote (Rural) vs. Sparrow (Urban)	-248.781	0	0	0.001
Malawi (Rural) vs. all	Coyote (Rural) vs. Sparrow (Urban)	-166.095	0	0	0.001
Malawi (Rural) vs. all	Coyote (Rural) vs. Sparrow (Urban)	-150.38	0	0	0.001
Malawi (Rural) vs. Sparrow (Rural)	Coyote (Rural) vs. Sparrow (Urban)	23.2611	0	0	0.001
Malawi (Rural) vs. Sparrow (Urban)	Coyote (Rural) vs. Sparrow (Urban)	26.54	0	0	0.001
Malawi (Rural) vs. Tibet (Rural)	Coyote (Rural) vs. Sparrow (Urban)	-274.993	0	0	0.001
Malawi (Rural) vs. Tibet (Semi-Urban)	Coyote (Rural) vs. Sparrow (Urban)	-201.384	0	0	0.001
Malawi (Rural) vs. Tibet (Urban)	Coyote (Rural) vs. Sparrow (Urban)	-204.146	0	0	0.001
Malawi (Rural) vs. USA (Urban)	Coyote (Rural) vs. Sparrow (Urban)	-146.89	0	0	0.001
Malawi (Rural) vs. Venezuela (Rural)	Coyote (Rural) vs. Sparrow (Urban)	-223.505	0	0	0.001
Malawi (Rural) vs. Yaounde (Urban)	Coyote (Rural) vs. Sparrow (Urban)	-201.965	0	0	0.001
Maricao (Rural) (non-cristatellus)noncristatellus vs. Coyote (Rural)	Coyote (Rural) vs. Sparrow (Urban)	21.5976	0	0	0.001
Maricao (Rural) (non-cristatellus)noncristatellus vs. Coyote (Urban)	Coyote (Rural) vs. Sparrow (Urban)	4.52356	6.3383e-06	0.116219	0.001
Maricao (Rural) (non-cristatellus)noncristatellus vs. Malawi (Rural)	Coyote (Rural) vs. Sparrow (Urban)	17.3862	0	0	0.001
Maricao (Rural) (non-cristatellus)noncristatellus vs. Maricao (Rural)	Coyote (Rural) vs. Sparrow (Urban)	-152.471	0	0	0.001
Maricao (Rural) (non-cristatellus)noncristatellus vs. Maricao (Rural) (non-cristatellus)noncristatellus	Coyote (Rural) vs. Sparrow (Urban)	-174.007	0	0	0.001
Maricao (Rural) (non-cristatellus)noncristatellus vs. Mayaguez (Urban)	Coyote (Rural) vs. Sparrow (Urban)	-165.186	0	0	0.001
Maricao (Rural) (non-cristatellus)noncristatellus vs. Mbalmayo (Semi-Urban)	Coyote (Rural) vs. Sparrow (Urban)	-1.5466	0.122062	1	0.135
Maricao (Rural) (non-cristatellus)noncristatellus vs. all	Coyote (Rural) vs. Sparrow (Urban)	-0.679768	0.496713	1	0.478
Maricao (Rural) (non-cristatellus)noncristatellus vs. all	Coyote (Rural) vs. Sparrow (Urban)	-19.4232	1.63774e-79	3.00295e-75	0.001
Maricao (Rural) (non-cristatellus)noncristatellus vs. Sparrow (Rural)	Coyote (Rural) vs. Sparrow (Urban)	24.0727	0	0	0.001
Maricao (Rural) (non-cristatellus)noncristatellus vs. Sparrow (Urban)	Coyote (Rural) vs. Sparrow (Urban)	31.7342	0	0	0.001
Maricao (Rural) (non-cristatellus)noncristatellus vs. Tibet (Rural)	Coyote (Rural) vs. Sparrow (Urban)	7.01247	2.95008e-12	5.40928e-08	0.001
Maricao (Rural) (non-cristatellus)noncristatellus vs. Tibet (Semi-Urban)	Coyote (Rural) vs. Sparrow (Urban)	-0.16271	0.870759	1	0.863
Maricao (Rural) (non-cristatellus)noncristatellus vs. Tibet (Urban)	Coyote (Rural) vs. Sparrow (Urban)	-3.11453	0.0018618	1	0.002
Maricao (Rural) (non-cristatellus)noncristatellus vs. USA (Urban)	Coyote (Rural) vs. Sparrow (Urban)	-38.9984	0	1.75317e-304	0.001
Maricao (Rural) (non-cristatellus)noncristatellus vs. Venezuela (Rural)	Coyote (Rural) vs. Sparrow (Urban)	10.6937	0	0	0.001
Maricao (Rural) (non-cristatellus)noncristatellus vs. Yaounde (Urban)	Coyote (Rural) vs. Sparrow (Urban)	-17.348	1.27766e-64	2.34271e-60	0.001
Maricao (Rural) vs. Coyote (Rural)	Coyote (Rural) vs. Sparrow (Urban)	15.474	0	0	0.001
Maricao (Rural) vs. Coyote (Urban)	Coyote (Rural) vs. Sparrow (Urban)	1.90131	0.0573646	1	0.052
Maricao (Rural) vs. Maricao (Rural)	Coyote (Rural) vs. Sparrow (Urban)	-150.456	0	0	0.001
Maricao (Rural) vs. Mayaguez (Urban)	Coyote (Rural) vs. Sparrow (Urban)	-188.838	0	0	0.001
Maricao (Rural) vs. Mbalmayo (Semi-Urban)	Coyote (Rural) vs. Sparrow (Urban)	-5.67696	1.49536e-08	0.00027419	0.001
Maricao (Rural) vs. all	Coyote (Rural) vs. Sparrow (Urban)	-2.32199	0.0203111	1	0.023
Maricao (Rural) vs. all	Coyote (Rural) vs. Sparrow (Urban)	-26.0972	1.69171e-136	3.10192e-132	0.001
Maricao (Rural) vs. Sparrow (Urban)	Coyote (Rural) vs. Sparrow (Urban)	32.871	0	0	0.001
Maricao (Rural) vs. Tibet (Rural)	Coyote (Rural) vs. Sparrow (Urban)	5.96002	2.84841e-09	5.22285e-05	0.001
Maricao (Rural) vs. Tibet (Semi-Urban)	Coyote (Rural) vs. Sparrow (Urban)	-2.44645	0.0144901	1	0.013
Maricao (Rural) vs. Tibet (Urban)	Coyote (Rural) vs. Sparrow (Urban)	-5.17632	2.42844e-07	0.00445279	0.001
Maricao (Rural) vs. USA (Urban)	Coyote (Rural) vs. Sparrow (Urban)	-45.8419	0	0	0.001
Maricao (Rural) vs. Venezuela (Rural)	Coyote (Rural) vs. Sparrow (Urban)	5.93033	3.29788e-09	6.04699e-05	0.001
Maricao (Rural) vs. Yaounde (Urban)	Coyote (Rural) vs. Sparrow (Urban)	-23.6676	7.87261e-115	1.44352e-110	0.001
Mayaguez (Urban) vs. Mayaguez (Urban)	Coyote (Rural) vs. Sparrow (Urban)	-165.523	0	0	0.001
Mbalmayo (Semi-Urban) vs. Mbalmayo (Semi-Urban)	Coyote (Rural) vs. Sparrow (Urban)	-232.29	0	0	0.001
Ngoantet (Rural) vs. Coyote (Rural)	Coyote (Rural) vs. Sparrow (Urban)	-36.8171	1.09006e-269	1.99873e-265	0.001
Ngoantet (Rural) vs. Coyote (Urban)	Coyote (Rural) vs. Sparrow (Urban)	-34.0755	1.28727e-217	2.36033e-213	0.001
Ngoantet (Rural) vs. Malawi (Rural)	Coyote (Rural) vs. Sparrow (Urban)	-240.022	0	0	0.001
Ngoantet (Rural) vs. Maricao (Rural)	Coyote (Rural) vs. Sparrow (Urban)	-8.29539	1.3717e-16	2.51515e-12	0.001
Ngoantet (Rural) vs. Maricao (Rural) (non-cristatellus)noncristatellus	Coyote (Rural) vs. Sparrow (Urban)	0.758041	0.448463	1	0.409
Ngoantet (Rural) vs. Mayaguez (Urban)	Coyote (Rural) vs. Sparrow (Urban)	-14.8961	1.39421e-48	2.55642e-44	0.001
Ngoantet (Rural) vs. Mbalmayo (Semi-Urban)	Coyote (Rural) vs. Sparrow (Urban)	-246.546	0	0	0.001
Ngoantet (Rural) vs. all	Coyote (Rural) vs. Sparrow (Urban)	-185.848	0	0	0.001
Ngoantet (Rural) vs. all	Coyote (Rural) vs. Sparrow (Urban)	-164.259	0	0	0.001
Ngoantet (Rural) vs. Ngoantet (Rural)	Coyote (Rural) vs. Sparrow (Urban)	-234.968	0	0	0.001
Ngoantet (Rural) vs. Sparrow (Rural)	Coyote (Rural) vs. Sparrow (Urban)	19.401	0	0	0.001
Ngoantet (Rural) vs. Sparrow (Urban)	Coyote (Rural) vs. Sparrow (Urban)	19.7081	0	0	0.001
Ngoantet (Rural) vs. Tibet (Rural)	Coyote (Rural) vs. Sparrow (Urban)	-291.92	0	0	0.001
Ngoantet (Rural) vs. Tibet (Semi-Urban)	Coyote (Rural) vs. Sparrow (Urban)	-207.422	0	0	0.001
Ngoantet (Rural) vs. Tibet (Urban)	Coyote (Rural) vs. Sparrow (Urban)	-225.704	0	0	0.001
Ngoantet (Rural) vs. USA (Urban)	Coyote (Rural) vs. Sparrow (Urban)	-157.826	0	0	0.001
Ngoantet (Rural) vs. Venezuela (Rural)	Coyote (Rural) vs. Sparrow (Urban)	-208.097	0	0	0.001
Ngoantet (Rural) vs. Yaounde (Urban)	Coyote (Rural) vs. Sparrow (Urban)	-206.683	0	0	0.001
Sparrow (Rural) vs. Coyote (Rural)	Coyote (Rural) vs. Sparrow (Urban)	-2.96439	0.00305254	1	0.003
Sparrow (Rural) vs. Coyote (Urban)	Coyote (Rural) vs. Sparrow (Urban)	1.27993	0.200681	1	0.192
Sparrow (Rural) vs. Maricao (Rural)	Coyote (Rural) vs. Sparrow (Urban)	24.7221	0	0	0.001
Sparrow (Rural) vs. Mayaguez (Urban)	Coyote (Rural) vs. Sparrow (Urban)	11.7935	0	0	0.001
Sparrow (Rural) vs. Mbalmayo (Semi-Urban)	Coyote (Rural) vs. Sparrow (Urban)	11.149	0	0	0.001
Sparrow (Rural) vs. all	Coyote (Rural) vs. Sparrow (Urban)	4.5607	5.34091e-06	0.0979309	0.001
Sparrow (Rural) vs. all	Coyote (Rural) vs. Sparrow (Urban)	23.8617	0	0	0.001
Sparrow (Rural) vs. Sparrow (Rural)	Coyote (Rural) vs. Sparrow (Urban)	-125.976	0	0	0.001
Sparrow (Rural) vs. Sparrow (Urban)	Coyote (Rural) vs. Sparrow (Urban)	-143.758	0	0	0.001
Sparrow (Rural) vs. Tibet (Rural)	Coyote (Rural) vs. Sparrow (Urban)	10.4113	0	0	0.001
Sparrow (Rural) vs. Tibet (Semi-Urban)	Coyote (Rural) vs. Sparrow (Urban)	9.90439	0	0	0.001
Sparrow (Rural) vs. Tibet (Urban)	Coyote (Rural) vs. Sparrow (Urban)	2.41927	0.0156191	1	0.009
Sparrow (Rural) vs. USA (Urban)	Coyote (Rural) vs. Sparrow (Urban)	26.3575	0	0	0.001
Sparrow (Rural) vs. Venezuela (Rural)	Coyote (Rural) vs. Sparrow (Urban)	12.0048	0	0	0.001
Sparrow (Rural) vs. Yaounde (Urban)	Coyote (Rural) vs. Sparrow (Urban)	10.9938	0	0	0.001
Sparrow (Urban) vs. Sparrow (Urban)	Coyote (Rural) vs. Sparrow (Urban)	-138.848	0	0	0.001
Tibet (Rural) vs. Tibet (Rural)	Coyote (Rural) vs. Sparrow (Urban)	-140.161	0	0	0.001
Tibet (Semi-Urban) vs. Coyote (Rural)	Coyote (Rural) vs. Sparrow (Urban)	-39.4747	2.14219e-272	3.92793e-268	0.001
Tibet (Semi-Urban) vs. Coyote (Urban)	Coyote (Rural) vs. Sparrow (Urban)	-35.138	1.64053e-220	3.00807e-216	0.001
Tibet (Semi-Urban) vs. Mayaguez (Urban)	Coyote (Rural) vs. Sparrow (Urban)	-5.16783	2.55375e-07	0.00468255	0.001
Tibet (Semi-Urban) vs. Mbalmayo (Semi-Urban)	Coyote (Rural) vs. Sparrow (Urban)	-187.125	0	0	0.001
Tibet (Semi-Urban) vs. all	Coyote (Rural) vs. Sparrow (Urban)	-133.778	0	0	0.001
Tibet (Semi-Urban) vs. all	Coyote (Rural) vs. Sparrow (Urban)	-184.66	0	0	0.001
Tibet (Semi-Urban) vs. Sparrow (Urban)	Coyote (Rural) vs. Sparrow (Urban)	12.4575	0	0	0.001
Tibet (Semi-Urban) vs. Tibet (Rural)	Coyote (Rural) vs. Sparrow (Urban)	-188.664	0	0	0.001
Tibet (Semi-Urban) vs. Tibet (Semi-Urban)	Coyote (Rural) vs. Sparrow (Urban)	-143.887	0	0	0.001
Tibet (Semi-Urban) vs. Tibet (Urban)	Coyote (Rural) vs. Sparrow (Urban)	-178.407	0	0	0.001
Tibet (Semi-Urban) vs. USA (Urban)	Coyote (Rural) vs. Sparrow (Urban)	-187.128	0	0	0.001
Tibet (Semi-Urban) vs. Venezuela (Rural)	Coyote (Rural) vs. Sparrow (Urban)	-172.065	0	0	0.001
Tibet (Semi-Urban) vs. Yaounde (Urban)	Coyote (Rural) vs. Sparrow (Urban)	-199.1	0	0	0.001
Tibet (Urban) vs. Tibet (Urban)	Coyote (Rural) vs. Sparrow (Urban)	-118.086	0	0	0.001
USA (Urban) vs. Coyote (Rural)	Coyote (Rural) vs. Sparrow (Urban)	-51.9243	0	0	0.001
USA (Urban) vs. Coyote (Urban)	Coyote (Rural) vs. Sparrow (Urban)	-58.1575	0	0	0.001
USA (Urban) vs. Mayaguez (Urban)	Coyote (Rural) vs. Sparrow (Urban)	-62.3416	0	0	0.001
USA (Urban) vs. Mbalmayo (Semi-Urban)	Coyote (Rural) vs. Sparrow (Urban)	-150.705	0	0	0.001
USA (Urban) vs. all	Coyote (Rural) vs. Sparrow (Urban)	-179.801	0	0	0.001
USA (Urban) vs. all	Coyote (Rural) vs. Sparrow (Urban)	-224.348	0	0	0.001
USA (Urban) vs. Sparrow (Urban)	Coyote (Rural) vs. Sparrow (Urban)	24.409	0	0	0.001
USA (Urban) vs. Tibet (Rural)	Coyote (Rural) vs. Sparrow (Urban)	-169.539	0	0	0.001
USA (Urban) vs. Tibet (Urban)	Coyote (Rural) vs. Sparrow (Urban)	-188.668	0	0	0.001
USA (Urban) vs. USA (Urban)	Coyote (Rural) vs. Sparrow (Urban)	-239.913	0	0	0.001
USA (Urban) vs. Venezuela (Rural)	Coyote (Rural) vs. Sparrow (Urban)	-132.119	0	0	0.001
Venezuela (Rural) vs. Venezuela (Rural)	Coyote (Rural) vs. Sparrow (Urban)	-200.249	0	0	0.001
Yaounde (Urban) vs. Coyote (Rural)	Coyote (Rural) vs. Sparrow (Urban)	-44.8458	0	0	0.001
Yaounde (Urban) vs. Coyote (Urban)	Coyote (Rural) vs. Sparrow (Urban)	-41.3534	1.04041e-290	1.9077e-286	0.001
Yaounde (Urban) vs. Mayaguez (Urban)	Coyote (Rural) vs. Sparrow (Urban)	-23.0979	5.64131e-108	1.03439e-103	0.001
Yaounde (Urban) vs. Mbalmayo (Semi-Urban)	Coyote (Rural) vs. Sparrow (Urban)	-211.489	0	0	0.001
Yaounde (Urban) vs. all	Coyote (Rural) vs. Sparrow (Urban)	-171.591	0	0	0.001
Yaounde (Urban) vs. all	Coyote (Rural) vs. Sparrow (Urban)	-184.268	0	0	0.001
Yaounde (Urban) vs. Sparrow (Urban)	Coyote (Rural) vs. Sparrow (Urban)	10.5866	0	0	0.001
Yaounde (Urban) vs. Tibet (Rural)	Coyote (Rural) vs. Sparrow (Urban)	-244.723	0	0	0.001
Yaounde (Urban) vs. Tibet (Urban)	Coyote (Rural) vs. Sparrow (Urban)	-217.963	0	0	0.001
Yaounde (Urban) vs. USA (Urban)	Coyote (Rural) vs. Sparrow (Urban)	-162.905	0	0	0.001
Yaounde (Urban) vs. Venezuela (Rural)	Coyote (Rural) vs. Sparrow (Urban)	-176.921	0	0	0.001
Yaounde (Urban) vs. Yaounde (Urban)	Coyote (Rural) vs. Sparrow (Urban)	-205.526	0	0	0.001
All between population	Coyote (Rural) vs. Tibet (Rural)	-13.7855	3.25276e-43	5.96426e-39	0.001
All within population	Coyote (Rural) vs. Tibet (Rural)	-72.0131	0	0	0.001
Coyote (Rural) vs. Coyote (Rural)	Coyote (Rural) vs. Tibet (Rural)	-53.4306	0	0	0.001
Coyote (Rural) vs. Coyote (Urban)	Coyote (Rural) vs. Tibet (Rural)	-41.8621	1.72082e-216	3.1553e-212	0.001
Coyote (Rural) vs. Mayaguez (Urban)	Coyote (Rural) vs. Tibet (Rural)	19.7365	0	0	0.001
Coyote (Rural) vs. Mbalmayo (Semi-Urban)	Coyote (Rural) vs. Tibet (Rural)	5.47474	5.1259e-08	0.000939885	0.001
Coyote (Rural) vs. all	Coyote (Rural) vs. Tibet (Rural)	2.53156	0.0114471	1	0.012
Coyote (Rural) vs. Sparrow (Urban)	Coyote (Rural) vs. Tibet (Rural)	35.6575	0	0	0.001
Coyote (Rural) vs. Tibet (Urban)	Coyote (Rural) vs. Tibet (Rural)	-3.48447	0.00051894	1	0.001
Coyote (Rural) vs. Venezuela (Rural)	Coyote (Rural) vs. Tibet (Rural)	6.08018	1.39347e-09	2.55507e-05	0.001
Coyote (Urban) vs. Coyote (Urban)	Coyote (Rural) vs. Tibet (Rural)	-32.0121	5.10471e-119	9.35999e-115	0.001
Malawi (Rural) vs. Coyote (Rural)	Coyote (Rural) vs. Tibet (Rural)	10.694	0	0	0.001
Malawi (Rural) vs. Coyote (Urban)	Coyote (Rural) vs. Tibet (Rural)	-6.39674	2.48279e-10	4.55245e-06	0.001
Malawi (Rural) vs. Malawi (Rural)	Coyote (Rural) vs. Tibet (Rural)	-94.9622	0	0	0.001
Malawi (Rural) vs. Maricao (Rural)	Coyote (Rural) vs. Tibet (Rural)	43.6288	0	0	0.001
Malawi (Rural) vs. Mayaguez (Urban)	Coyote (Rural) vs. Tibet (Rural)	23.4187	0	0	0.001
Malawi (Rural) vs. Mbalmayo (Semi-Urban)	Coyote (Rural) vs. Tibet (Rural)	-95.069	0	0	0.001
Malawi (Rural) vs. all	Coyote (Rural) vs. Tibet (Rural)	-62.8446	1.48103e-273	2.71562e-269	0.001
Malawi (Rural) vs. all	Coyote (Rural) vs. Tibet (Rural)	-54.4503	0	0	0.001
Malawi (Rural) vs. Sparrow (Rural)	Coyote (Rural) vs. Tibet (Rural)	44.324	0	0	0.001
Malawi (Rural) vs. Sparrow (Urban)	Coyote (Rural) vs. Tibet (Rural)	56.8094	0	0	0.001
Malawi (Rural) vs. Tibet (Rural)	Coyote (Rural) vs. Tibet (Rural)	-105.095	0	0	0.001
Malawi (Rural) vs. Tibet (Semi-Urban)	Coyote (Rural) vs. Tibet (Rural)	-75.7845	0	0	0.001
Malawi (Rural) vs. Tibet (Urban)	Coyote (Rural) vs. Tibet (Rural)	-75.8902	0	0	0.001
Malawi (Rural) vs. USA (Urban)	Coyote (Rural) vs. Tibet (Rural)	-52.7416	0	0	0.001
Malawi (Rural) vs. Venezuela (Rural)	Coyote (Rural) vs. Tibet (Rural)	-85.4582	0	0	0.001
Malawi (Rural) vs. Yaounde (Urban)	Coyote (Rural) vs. Tibet (Rural)	-76.5368	0	0	0.001
Maricao (Rural) (non-cristatellus)noncristatellus vs. Coyote (Rural)	Coyote (Rural) vs. Tibet (Rural)	45.1343	0	0	0.001
Maricao (Rural) (non-cristatellus)noncristatellus vs. Coyote (Urban)	Coyote (Rural) vs. Tibet (Rural)	19.8042	0	0	0.001
Maricao (Rural) (non-cristatellus)noncristatellus vs. Malawi (Rural)	Coyote (Rural) vs. Tibet (Rural)	45.4953	0	0	0.001
Maricao (Rural) (non-cristatellus)noncristatellus vs. Maricao (Rural)	Coyote (Rural) vs. Tibet (Rural)	-56.8645	0	0	0.001
Maricao (Rural) (non-cristatellus)noncristatellus vs. Maricao (Rural) (non-cristatellus)noncristatellus	Coyote (Rural) vs. Tibet (Rural)	-66.3063	0	0	0.001
Maricao (Rural) (non-cristatellus)noncristatellus vs. Mayaguez (Urban)	Coyote (Rural) vs. Tibet (Rural)	-61.2733	1.06716e-288	1.95674e-284	0.001
Maricao (Rural) (non-cristatellus)noncristatellus vs. Mbalmayo (Semi-Urban)	Coyote (Rural) vs. Tibet (Rural)	23.9109	0	0	0.001
Maricao (Rural) (non-cristatellus)noncristatellus vs. all	Coyote (Rural) vs. Tibet (Rural)	11.3041	0	0	0.001
Maricao (Rural) (non-cristatellus)noncristatellus vs. all	Coyote (Rural) vs. Tibet (Rural)	16.3092	0	0	0.001
Maricao (Rural) (non-cristatellus)noncristatellus vs. Sparrow (Rural)	Coyote (Rural) vs. Tibet (Rural)	37.6842	0	0	0.001
Maricao (Rural) (non-cristatellus)noncristatellus vs. Sparrow (Urban)	Coyote (Rural) vs. Tibet (Rural)	51.2293	0	0	0.001
Maricao (Rural) (non-cristatellus)noncristatellus vs. Tibet (Rural)	Coyote (Rural) vs. Tibet (Rural)	19.2484	0	0	0.001
Maricao (Rural) (non-cristatellus)noncristatellus vs. Tibet (Semi-Urban)	Coyote (Rural) vs. Tibet (Rural)	15.8012	0	0	0.001
Maricao (Rural) (non-cristatellus)noncristatellus vs. Tibet (Urban)	Coyote (Rural) vs. Tibet (Rural)	14.5726	0	0	0.001
Maricao (Rural) (non-cristatellus)noncristatellus vs. USA (Urban)	Coyote (Rural) vs. Tibet (Rural)	24.6102	0	0	0.001
Maricao (Rural) (non-cristatellus)noncristatellus vs. Venezuela (Rural)	Coyote (Rural) vs. Tibet (Rural)	35.7943	0	0	0.001
Maricao (Rural) (non-cristatellus)noncristatellus vs. Yaounde (Urban)	Coyote (Rural) vs. Tibet (Rural)	17.6315	0	0	0.001
Maricao (Rural) vs. Coyote (Rural)	Coyote (Rural) vs. Tibet (Rural)	42.4769	0	0	0.001
Maricao (Rural) vs. Coyote (Urban)	Coyote (Rural) vs. Tibet (Rural)	19.295	0	0	0.001
Maricao (Rural) vs. Maricao (Rural)	Coyote (Rural) vs. Tibet (Rural)	-56.6394	1.34258321385726e-310	2.46176e-306	0.001
Maricao (Rural) vs. Mayaguez (Urban)	Coyote (Rural) vs. Tibet (Rural)	-71.1486	0	0	0.001
Maricao (Rural) vs. Mbalmayo (Semi-Urban)	Coyote (Rural) vs. Tibet (Rural)	22.4536	0	0	0.001
Maricao (Rural) vs. all	Coyote (Rural) vs. Tibet (Rural)	11.0688	0	0	0.001
Maricao (Rural) vs. all	Coyote (Rural) vs. Tibet (Rural)	13.9809	0	0	0.001
Maricao (Rural) vs. Sparrow (Urban)	Coyote (Rural) vs. Tibet (Rural)	53.6625	0	0	0.001
Maricao (Rural) vs. Tibet (Rural)	Coyote (Rural) vs. Tibet (Rural)	19.4442	0	0	0.001
Maricao (Rural) vs. Tibet (Semi-Urban)	Coyote (Rural) vs. Tibet (Rural)	15.5217	0	0	0.001
Maricao (Rural) vs. Tibet (Urban)	Coyote (Rural) vs. Tibet (Rural)	14.3132	0	0	0.001
Maricao (Rural) vs. USA (Urban)	Coyote (Rural) vs. Tibet (Rural)	19.194	0	0	0.001
Maricao (Rural) vs. Venezuela (Rural)	Coyote (Rural) vs. Tibet (Rural)	34.1772	0	0	0.001
Maricao (Rural) vs. Yaounde (Urban)	Coyote (Rural) vs. Tibet (Rural)	15.2134	0	0	0.001
Mayaguez (Urban) vs. Mayaguez (Urban)	Coyote (Rural) vs. Tibet (Rural)	-66.09	1.1932e-236	2.18786e-232	0.001
Mbalmayo (Semi-Urban) vs. Mbalmayo (Semi-Urban)	Coyote (Rural) vs. Tibet (Rural)	-90.4981	0	0	0.001
Ngoantet (Rural) vs. Coyote (Rural)	Coyote (Rural) vs. Tibet (Rural)	5.29259	1.26371e-07	0.00231714	0.001
Ngoantet (Rural) vs. Coyote (Urban)	Coyote (Rural) vs. Tibet (Rural)	-7.8982	6.37804e-15	1.16948e-10	0.001
Ngoantet (Rural) vs. Malawi (Rural)	Coyote (Rural) vs. Tibet (Rural)	-91.4732	0	0	0.001
Ngoantet (Rural) vs. Maricao (Rural)	Coyote (Rural) vs. Tibet (Rural)	36.6216	0	0	0.001
Ngoantet (Rural) vs. Maricao (Rural) (non-cristatellus)noncristatellus	Coyote (Rural) vs. Tibet (Rural)	41.1342	0	0	0.001
Ngoantet (Rural) vs. Mayaguez (Urban)	Coyote (Rural) vs. Tibet (Rural)	19.9395	0	0	0.001
Ngoantet (Rural) vs. Mbalmayo (Semi-Urban)	Coyote (Rural) vs. Tibet (Rural)	-94.6305	0	0	0.001
Ngoantet (Rural) vs. all	Coyote (Rural) vs. Tibet (Rural)	-70.494	0	0	0.001
Ngoantet (Rural) vs. all	Coyote (Rural) vs. Tibet (Rural)	-59.8848	0	0	0.001
Ngoantet (Rural) vs. Ngoantet (Rural)	Coyote (Rural) vs. Tibet (Rural)	-90.1595	0	0	0.001
Ngoantet (Rural) vs. Sparrow (Rural)	Coyote (Rural) vs. Tibet (Rural)	45.6884	0	0	0.001
Ngoantet (Rural) vs. Sparrow (Urban)	Coyote (Rural) vs. Tibet (Rural)	55.8238	0	0	0.001
Ngoantet (Rural) vs. Tibet (Rural)	Coyote (Rural) vs. Tibet (Rural)	-111.593	0	0	0.001
Ngoantet (Rural) vs. Tibet (Semi-Urban)	Coyote (Rural) vs. Tibet (Rural)	-78.2195	0	0	0.001
Ngoantet (Rural) vs. Tibet (Urban)	Coyote (Rural) vs. Tibet (Rural)	-84.1591	0	0	0.001
Ngoantet (Rural) vs. USA (Urban)	Coyote (Rural) vs. Tibet (Rural)	-56.8644	0	0	0.001
Ngoantet (Rural) vs. Venezuela (Rural)	Coyote (Rural) vs. Tibet (Rural)	-79.0843	0	0	0.001
Ngoantet (Rural) vs. Yaounde (Urban)	Coyote (Rural) vs. Tibet (Rural)	-78.7299	0	0	0.001
Sparrow (Rural) vs. Coyote (Rural)	Coyote (Rural) vs. Tibet (Rural)	26.0408	0	0	0.001
Sparrow (Rural) vs. Coyote (Urban)	Coyote (Rural) vs. Tibet (Rural)	15.8063	0	0	0.001
Sparrow (Rural) vs. Maricao (Rural)	Coyote (Rural) vs. Tibet (Rural)	38.9271	0	0	0.001
Sparrow (Rural) vs. Mayaguez (Urban)	Coyote (Rural) vs. Tibet (Rural)	21.019	0	0	0.001
Sparrow (Rural) vs. Mbalmayo (Semi-Urban)	Coyote (Rural) vs. Tibet (Rural)	27.0499	0	0	0.001
Sparrow (Rural) vs. all	Coyote (Rural) vs. Tibet (Rural)	12.0831	0	0	0.001
Sparrow (Rural) vs. all	Coyote (Rural) vs. Tibet (Rural)	34.7861	0	0	0.001
Sparrow (Rural) vs. Sparrow (Rural)	Coyote (Rural) vs. Tibet (Rural)	-43.4231	1.49465e-196	2.74059e-192	0.001
Sparrow (Rural) vs. Sparrow (Urban)	Coyote (Rural) vs. Tibet (Rural)	-45.7565	1.46004e-286	2.67712e-282	0.001
Sparrow (Rural) vs. Tibet (Rural)	Coyote (Rural) vs. Tibet (Rural)	18.7738	0	0	0.001
Sparrow (Rural) vs. Tibet (Semi-Urban)	Coyote (Rural) vs. Tibet (Rural)	18.4757	0	0	0.001
Sparrow (Rural) vs. Tibet (Urban)	Coyote (Rural) vs. Tibet (Rural)	14.8053	0	0	0.001
Sparrow (Rural) vs. USA (Urban)	Coyote (Rural) vs. Tibet (Rural)	61.8553	0	0	0.001
Sparrow (Rural) vs. Venezuela (Rural)	Coyote (Rural) vs. Tibet (Rural)	33.0588	0	0	0.001
Sparrow (Rural) vs. Yaounde (Urban)	Coyote (Rural) vs. Tibet (Rural)	29.9548	0	0	0.001
Sparrow (Urban) vs. Sparrow (Urban)	Coyote (Rural) vs. Tibet (Rural)	-43.3196	2.69019e-266	4.93273e-262	0.001
Tibet (Rural) vs. Tibet (Rural)	Coyote (Rural) vs. Tibet (Rural)	-56.0138	7.07873e-203	1.29796e-198	0.001
Tibet (Semi-Urban) vs. Coyote (Rural)	Coyote (Rural) vs. Tibet (Rural)	-2.17669	0.0297847	1	0.029
Tibet (Semi-Urban) vs. Coyote (Urban)	Coyote (Rural) vs. Tibet (Rural)	-9.02068	4.14509e-18	7.60044e-14	0.001
Tibet (Semi-Urban) vs. Mayaguez (Urban)	Coyote (Rural) vs. Tibet (Rural)	6.97528	9.84812e-12	1.80575e-07	0.001
Tibet (Semi-Urban) vs. Mbalmayo (Semi-Urban)	Coyote (Rural) vs. Tibet (Rural)	-71.8884	1.18286e-291	2.1689e-287	0.001
Tibet (Semi-Urban) vs. all	Coyote (Rural) vs. Tibet (Rural)	-53.0556	8.63317e-195	1.58298e-190	0.001
Tibet (Semi-Urban) vs. all	Coyote (Rural) vs. Tibet (Rural)	-69.9073	2.89831e-292	5.31433e-288	0.001
Tibet (Semi-Urban) vs. Sparrow (Urban)	Coyote (Rural) vs. Tibet (Rural)	25.4105	0	0	0.001
Tibet (Semi-Urban) vs. Tibet (Rural)	Coyote (Rural) vs. Tibet (Rural)	-74.7826	5.93405e-266	1.08807e-261	0.001
Tibet (Semi-Urban) vs. Tibet (Semi-Urban)	Coyote (Rural) vs. Tibet (Rural)	-57.774	4.19511e-208	7.69215e-204	0.001
Tibet (Semi-Urban) vs. Tibet (Urban)	Coyote (Rural) vs. Tibet (Rural)	-70.3742	2.17754e-254	3.99273e-250	0.001
Tibet (Semi-Urban) vs. USA (Urban)	Coyote (Rural) vs. Tibet (Rural)	-69.4923	0	0	0.001
Tibet (Semi-Urban) vs. Venezuela (Rural)	Coyote (Rural) vs. Tibet (Rural)	-64.9617	7.426e-303	1.36163e-298	0.001
Tibet (Semi-Urban) vs. Yaounde (Urban)	Coyote (Rural) vs. Tibet (Rural)	-76.2301	0	0	0.001
Tibet (Urban) vs. Tibet (Urban)	Coyote (Rural) vs. Tibet (Rural)	-46.5781	1.33039e-172	2.43941e-168	0.001
USA (Urban) vs. Coyote (Rural)	Coyote (Rural) vs. Tibet (Rural)	-5.99918	2.03905e-09	3.73881e-05	0.001
USA (Urban) vs. Coyote (Urban)	Coyote (Rural) vs. Tibet (Rural)	-15.2208	2.98671e-50	5.47644e-46	0.001
USA (Urban) vs. Mayaguez (Urban)	Coyote (Rural) vs. Tibet (Rural)	4.43859	9.41904e-06	0.172707	0.001
USA (Urban) vs. Mbalmayo (Semi-Urban)	Coyote (Rural) vs. Tibet (Rural)	-55.1329	0	0	0.001
USA (Urban) vs. all	Coyote (Rural) vs. Tibet (Rural)	-66.6221	0	0	0.001
USA (Urban) vs. all	Coyote (Rural) vs. Tibet (Rural)	-84.8062	0	0	0.001
USA (Urban) vs. Sparrow (Urban)	Coyote (Rural) vs. Tibet (Rural)	67.7232	0	0	0.001
USA (Urban) vs. Tibet (Rural)	Coyote (Rural) vs. Tibet (Rural)	-62.4469	0	0	0.001
USA (Urban) vs. Tibet (Urban)	Coyote (Rural) vs. Tibet (Rural)	-70.4225	0	0	0.001
USA (Urban) vs. USA (Urban)	Coyote (Rural) vs. Tibet (Rural)	-92.0881	0	0	0.001
USA (Urban) vs. Venezuela (Rural)	Coyote (Rural) vs. Tibet (Rural)	-47.5996	0	0	0.001
Venezuela (Rural) vs. Venezuela (Rural)	Coyote (Rural) vs. Tibet (Rural)	-77.3713	0	0	0.001
Yaounde (Urban) vs. Coyote (Rural)	Coyote (Rural) vs. Tibet (Rural)	-2.88044	0.00401517	1	0.004
Yaounde (Urban) vs. Coyote (Urban)	Coyote (Rural) vs. Tibet (Rural)	-10.9645	6.1765e-26	1.13252e-21	0.001
Yaounde (Urban) vs. Mayaguez (Urban)	Coyote (Rural) vs. Tibet (Rural)	5.92152	4.98585e-09	9.14206e-05	0.001
Yaounde (Urban) vs. Mbalmayo (Semi-Urban)	Coyote (Rural) vs. Tibet (Rural)	-81.2641	0	0	0.001
Yaounde (Urban) vs. all	Coyote (Rural) vs. Tibet (Rural)	-66.199	2.02627e-258	3.71537e-254	0.001
Yaounde (Urban) vs. all	Coyote (Rural) vs. Tibet (Rural)	-68.9474	0	0	0.001
Yaounde (Urban) vs. Sparrow (Urban)	Coyote (Rural) vs. Tibet (Rural)	38.6364	0	0	0.001
Yaounde (Urban) vs. Tibet (Rural)	Coyote (Rural) vs. Tibet (Rural)	-94.8194	0	0	0.001
Yaounde (Urban) vs. Tibet (Urban)	Coyote (Rural) vs. Tibet (Rural)	-83.2819	0	0	0.001
Yaounde (Urban) vs. USA (Urban)	Coyote (Rural) vs. Tibet (Rural)	-60.3287	0	0	0.001
Yaounde (Urban) vs. Venezuela (Rural)	Coyote (Rural) vs. Tibet (Rural)	-67.1825	0	0	0.001
Yaounde (Urban) vs. Yaounde (Urban)	Coyote (Rural) vs. Tibet (Rural)	-79.0593	0	0	0.001
All between population	Coyote (Rural) vs. Tibet (Urban)	-12.8026	1.6373e-37	3.00215e-33	0.001
All within population	Coyote (Rural) vs. Tibet (Urban)	-70.5941	0	0	0.001
Coyote (Rural) vs. Coyote (Rural)	Coyote (Rural) vs. Tibet (Urban)	-52.239	0	0	0.001
Coyote (Rural) vs. Coyote (Urban)	Coyote (Rural) vs. Tibet (Urban)	-40.6723	6.20206e-209	1.13721e-204	0.001
Coyote (Rural) vs. Mayaguez (Urban)	Coyote (Rural) vs. Tibet (Urban)	21.7514	0	0	0.001
Coyote (Rural) vs. Mbalmayo (Semi-Urban)	Coyote (Rural) vs. Tibet (Urban)	9.59083	0	0	0.001
Coyote (Rural) vs. all	Coyote (Rural) vs. Tibet (Urban)	6.47765	1.22382e-10	2.244e-06	0.001
Coyote (Rural) vs. Sparrow (Urban)	Coyote (Rural) vs. Tibet (Urban)	40.7672	0	0	0.001
Coyote (Rural) vs. Venezuela (Rural)	Coyote (Rural) vs. Tibet (Urban)	11.2141	0	0	0.001
Coyote (Urban) vs. Coyote (Urban)	Coyote (Rural) vs. Tibet (Urban)	-30.0441	1.89535e-110	3.47531e-106	0.001
Malawi (Rural) vs. Coyote (Rural)	Coyote (Rural) vs. Tibet (Urban)	15.899	0	0	0.001
Malawi (Rural) vs. Coyote (Urban)	Coyote (Rural) vs. Tibet (Urban)	-4.86786	1.31969e-06	0.0241979	0.001
Malawi (Rural) vs. Malawi (Rural)	Coyote (Rural) vs. Tibet (Urban)	-92.6855	0	0	0.001
Malawi (Rural) vs. Maricao (Rural)	Coyote (Rural) vs. Tibet (Urban)	46.6079	0	0	0.001
Malawi (Rural) vs. Mayaguez (Urban)	Coyote (Rural) vs. Tibet (Urban)	24.9179	0	0	0.001
Malawi (Rural) vs. Mbalmayo (Semi-Urban)	Coyote (Rural) vs. Tibet (Urban)	-92.1054	0	0	0.001
Malawi (Rural) vs. all	Coyote (Rural) vs. Tibet (Urban)	-58.9896	9.50362e-259	1.74258e-254	0.001
Malawi (Rural) vs. all	Coyote (Rural) vs. Tibet (Urban)	-52.0356	0	0	0.001
Malawi (Rural) vs. Sparrow (Rural)	Coyote (Rural) vs. Tibet (Urban)	45.4174	0	0	0.001
Malawi (Rural) vs. Sparrow (Urban)	Coyote (Rural) vs. Tibet (Urban)	59.6428	0	0	0.001
Malawi (Rural) vs. Tibet (Rural)	Coyote (Rural) vs. Tibet (Urban)	-98.1351	0	0	0.001
Malawi (Rural) vs. Tibet (Semi-Urban)	Coyote (Rural) vs. Tibet (Urban)	-71.6792	0	0	0.001
Malawi (Rural) vs. Tibet (Urban)	Coyote (Rural) vs. Tibet (Urban)	-70.7314	0	0	0.001
Malawi (Rural) vs. USA (Urban)	Coyote (Rural) vs. Tibet (Urban)	-50.7123	0	0	0.001
Malawi (Rural) vs. Venezuela (Rural)	Coyote (Rural) vs. Tibet (Urban)	-83.3616	0	0	0.001
Malawi (Rural) vs. Yaounde (Urban)	Coyote (Rural) vs. Tibet (Urban)	-74.3555	0	0	0.001
Maricao (Rural) (non-cristatellus)noncristatellus vs. Coyote (Rural)	Coyote (Rural) vs. Tibet (Urban)	47.4369	0	0	0.001
Maricao (Rural) (non-cristatellus)noncristatellus vs. Coyote (Urban)	Coyote (Rural) vs. Tibet (Urban)	20.5947	0	0	0.001
Maricao (Rural) (non-cristatellus)noncristatellus vs. Malawi (Rural)	Coyote (Rural) vs. Tibet (Urban)	47.7729	0	0	0.001
Maricao (Rural) (non-cristatellus)noncristatellus vs. Maricao (Rural)	Coyote (Rural) vs. Tibet (Urban)	-54.935	0	0	0.001
Maricao (Rural) (non-cristatellus)noncristatellus vs. Maricao (Rural) (non-cristatellus)noncristatellus	Coyote (Rural) vs. Tibet (Urban)	-63.9757	0	0	0.001
Maricao (Rural) (non-cristatellus)noncristatellus vs. Mayaguez (Urban)	Coyote (Rural) vs. Tibet (Urban)	-57.2562	5.07698e-271	9.30915e-267	0.001
Maricao (Rural) (non-cristatellus)noncristatellus vs. Mbalmayo (Semi-Urban)	Coyote (Rural) vs. Tibet (Urban)	25.8628	0	0	0.001
Maricao (Rural) (non-cristatellus)noncristatellus vs. all	Coyote (Rural) vs. Tibet (Urban)	11.9576	0	0	0.001
Maricao (Rural) (non-cristatellus)noncristatellus vs. all	Coyote (Rural) vs. Tibet (Urban)	19.6586	0	0	0.001
Maricao (Rural) (non-cristatellus)noncristatellus vs. Sparrow (Rural)	Coyote (Rural) vs. Tibet (Urban)	37.7187	0	0	0.001
Maricao (Rural) (non-cristatellus)noncristatellus vs. Sparrow (Urban)	Coyote (Rural) vs. Tibet (Urban)	51.9074	0	0	0.001
Maricao (Rural) (non-cristatellus)noncristatellus vs. Tibet (Rural)	Coyote (Rural) vs. Tibet (Urban)	19.6918	0	0	0.001
Maricao (Rural) (non-cristatellus)noncristatellus vs. Tibet (Semi-Urban)	Coyote (Rural) vs. Tibet (Urban)	16.8023	0	0	0.001
Maricao (Rural) (non-cristatellus)noncristatellus vs. Tibet (Urban)	Coyote (Rural) vs. Tibet (Urban)	15.7545	0	0	0.001
Maricao (Rural) (non-cristatellus)noncristatellus vs. USA (Urban)	Coyote (Rural) vs. Tibet (Urban)	33.4293	0	0	0.001
Maricao (Rural) (non-cristatellus)noncristatellus vs. Venezuela (Rural)	Coyote (Rural) vs. Tibet (Urban)	38.0646	0	0	0.001
Maricao (Rural) (non-cristatellus)noncristatellus vs. Yaounde (Urban)	Coyote (Rural) vs. Tibet (Urban)	21.2715	0	0	0.001
Maricao (Rural) vs. Coyote (Rural)	Coyote (Rural) vs. Tibet (Urban)	45.5739	0	0	0.001
Maricao (Rural) vs. Coyote (Urban)	Coyote (Rural) vs. Tibet (Urban)	20.3602	0	0	0.001
Maricao (Rural) vs. Maricao (Rural)	Coyote (Rural) vs. Tibet (Urban)	-54.6346	5.43393e-299	9.96366e-295	0.001
Maricao (Rural) vs. Mayaguez (Urban)	Coyote (Rural) vs. Tibet (Urban)	-67.0768	4.6007e-320	8.43591557e-316	0.001
Maricao (Rural) vs. Mbalmayo (Semi-Urban)	Coyote (Rural) vs. Tibet (Urban)	24.8889	0	0	0.001
Maricao (Rural) vs. all	Coyote (Rural) vs. Tibet (Urban)	11.8801	0	0	0.001
Maricao (Rural) vs. all	Coyote (Rural) vs. Tibet (Urban)	17.8497	0	0	0.001
Maricao (Rural) vs. Sparrow (Urban)	Coyote (Rural) vs. Tibet (Urban)	54.346	0	0	0.001
Maricao (Rural) vs. Tibet (Rural)	Coyote (Rural) vs. Tibet (Urban)	20.0323	0	0	0.001
Maricao (Rural) vs. Tibet (Semi-Urban)	Coyote (Rural) vs. Tibet (Urban)	16.7269	0	0	0.001
Maricao (Rural) vs. Tibet (Urban)	Coyote (Rural) vs. Tibet (Urban)	15.7007	0	0	0.001
Maricao (Rural) vs. USA (Urban)	Coyote (Rural) vs. Tibet (Urban)	27.8465	0	0	0.001
Maricao (Rural) vs. Venezuela (Rural)	Coyote (Rural) vs. Tibet (Urban)	37.0248	0	0	0.001
Maricao (Rural) vs. Yaounde (Urban)	Coyote (Rural) vs. Tibet (Urban)	19.3254	0	0	0.001
Mayaguez (Urban) vs. Mayaguez (Urban)	Coyote (Rural) vs. Tibet (Urban)	-55.4128	1.92608e-205	3.53166e-201	0.001
Mbalmayo (Semi-Urban) vs. Mbalmayo (Semi-Urban)	Coyote (Rural) vs. Tibet (Urban)	-85.4623	0	0	0.001
Ngoantet (Rural) vs. Coyote (Rural)	Coyote (Rural) vs. Tibet (Urban)	10.2656	0	0	0.001
Ngoantet (Rural) vs. Coyote (Urban)	Coyote (Rural) vs. Tibet (Urban)	-6.28095	4.7039e-10	8.62507e-06	0.001
Ngoantet (Rural) vs. Malawi (Rural)	Coyote (Rural) vs. Tibet (Urban)	-89.3172	0	0	0.001
Ngoantet (Rural) vs. Maricao (Rural)	Coyote (Rural) vs. Tibet (Urban)	42.0995	0	0	0.001
Ngoantet (Rural) vs. Maricao (Rural) (non-cristatellus)noncristatellus	Coyote (Rural) vs. Tibet (Urban)	45.7464	0	0	0.001
Ngoantet (Rural) vs. Mayaguez (Urban)	Coyote (Rural) vs. Tibet (Urban)	22.9548	0	0	0.001
Ngoantet (Rural) vs. Mbalmayo (Semi-Urban)	Coyote (Rural) vs. Tibet (Urban)	-92.2282	0	0	0.001
Ngoantet (Rural) vs. all	Coyote (Rural) vs. Tibet (Urban)	-66.8096	2.70940859249e-312	4.96797e-308	0.001
Ngoantet (Rural) vs. all	Coyote (Rural) vs. Tibet (Urban)	-57.4895	0	0	0.001
Ngoantet (Rural) vs. Ngoantet (Rural)	Coyote (Rural) vs. Tibet (Urban)	-88.1671	0	0	0.001
Ngoantet (Rural) vs. Sparrow (Rural)	Coyote (Rural) vs. Tibet (Urban)	48.3891	0	0	0.001
Ngoantet (Rural) vs. Sparrow (Urban)	Coyote (Rural) vs. Tibet (Urban)	61.0009	0	0	0.001
Ngoantet (Rural) vs. Tibet (Rural)	Coyote (Rural) vs. Tibet (Urban)	-105.737	0	0	0.001
Ngoantet (Rural) vs. Tibet (Semi-Urban)	Coyote (Rural) vs. Tibet (Urban)	-74.8157	0	0	0.001
Ngoantet (Rural) vs. Tibet (Urban)	Coyote (Rural) vs. Tibet (Urban)	-79.3004	0	0	0.001
Ngoantet (Rural) vs. USA (Urban)	Coyote (Rural) vs. Tibet (Urban)	-54.747	0	0	0.001
Ngoantet (Rural) vs. Venezuela (Rural)	Coyote (Rural) vs. Tibet (Urban)	-77.1288	0	0	0.001
Ngoantet (Rural) vs. Yaounde (Urban)	Coyote (Rural) vs. Tibet (Urban)	-76.7753	0	0	0.001
Sparrow (Rural) vs. Coyote (Rural)	Coyote (Rural) vs. Tibet (Urban)	29.5809	0	0	0.001
Sparrow (Rural) vs. Coyote (Urban)	Coyote (Rural) vs. Tibet (Urban)	16.6853	0	0	0.001
Sparrow (Rural) vs. Maricao (Rural)	Coyote (Rural) vs. Tibet (Urban)	39.099	0	0	0.001
Sparrow (Rural) vs. Mayaguez (Urban)	Coyote (Rural) vs. Tibet (Urban)	21.0177	0	0	0.001
Sparrow (Rural) vs. Mbalmayo (Semi-Urban)	Coyote (Rural) vs. Tibet (Urban)	27.6982	0	0	0.001
Sparrow (Rural) vs. all	Coyote (Rural) vs. Tibet (Urban)	12.2624	0	0	0.001
Sparrow (Rural) vs. all	Coyote (Rural) vs. Tibet (Urban)	34.4844	0	0	0.001
Sparrow (Rural) vs. Sparrow (Rural)	Coyote (Rural) vs. Tibet (Urban)	-38.2012	4.48825e-170	8.22965e-166	0.001
Sparrow (Rural) vs. Sparrow (Urban)	Coyote (Rural) vs. Tibet (Urban)	-40.7103	1.86731e-244	3.42389e-240	0.001
Sparrow (Rural) vs. Tibet (Rural)	Coyote (Rural) vs. Tibet (Urban)	18.7703	0	0	0.001
Sparrow (Rural) vs. Tibet (Semi-Urban)	Coyote (Rural) vs. Tibet (Urban)	18.5319	0	0	0.001
Sparrow (Rural) vs. Tibet (Urban)	Coyote (Rural) vs. Tibet (Urban)	15.4798	0	0	0.001
Sparrow (Rural) vs. USA (Urban)	Coyote (Rural) vs. Tibet (Urban)	68.4856	0	0	0.001
Sparrow (Rural) vs. Venezuela (Rural)	Coyote (Rural) vs. Tibet (Urban)	34.6375	0	0	0.001
Sparrow (Rural) vs. Yaounde (Urban)	Coyote (Rural) vs. Tibet (Urban)	31.0963	0	0	0.001
Sparrow (Urban) vs. Sparrow (Urban)	Coyote (Rural) vs. Tibet (Urban)	-38.1737	3.754e-223	6.88333e-219	0.001
Tibet (Rural) vs. Tibet (Rural)	Coyote (Rural) vs. Tibet (Urban)	-51.8013	7.53186e-190	1.38104e-185	0.001
Tibet (Semi-Urban) vs. Coyote (Rural)	Coyote (Rural) vs. Tibet (Urban)	1.38359	0.166855	1	0.169
Tibet (Semi-Urban) vs. Coyote (Urban)	Coyote (Rural) vs. Tibet (Urban)	-6.98256	9.39464e-12	1.7226e-07	0.001
Tibet (Semi-Urban) vs. Mayaguez (Urban)	Coyote (Rural) vs. Tibet (Urban)	7.83674	2.86438e-14	5.25212e-10	0.001
Tibet (Semi-Urban) vs. Mbalmayo (Semi-Urban)	Coyote (Rural) vs. Tibet (Urban)	-66.9417	1.41471e-275	2.59401e-271	0.001
Tibet (Semi-Urban) vs. all	Coyote (Rural) vs. Tibet (Urban)	-46.0161	1.78146e-171	3.26648e-167	0.001
Tibet (Semi-Urban) vs. all	Coyote (Rural) vs. Tibet (Urban)	-64.0095	7.83179e-272	1.43604e-267	0.001
Tibet (Semi-Urban) vs. Sparrow (Urban)	Coyote (Rural) vs. Tibet (Urban)	25.6902	0	0	0.001
Tibet (Semi-Urban) vs. Tibet (Rural)	Coyote (Rural) vs. Tibet (Urban)	-67.3295	4.78034e-246	8.76524e-242	0.001
Tibet (Semi-Urban) vs. Tibet (Semi-Urban)	Coyote (Rural) vs. Tibet (Urban)	-49.8942	1.06633e-183	1.95523e-179	0.001
Tibet (Semi-Urban) vs. Tibet (Urban)	Coyote (Rural) vs. Tibet (Urban)	-62.139	4.24903e-231	7.79103e-227	0.001
Tibet (Semi-Urban) vs. USA (Urban)	Coyote (Rural) vs. Tibet (Urban)	-67.0786	0	0	0.001
Tibet (Semi-Urban) vs. Venezuela (Rural)	Coyote (Rural) vs. Tibet (Urban)	-61.571	1.11032e-288	2.03588e-284	0.001
Tibet (Semi-Urban) vs. Yaounde (Urban)	Coyote (Rural) vs. Tibet (Urban)	-71.5728	0	4.60678e-305	0.001
Tibet (Urban) vs. Tibet (Urban)	Coyote (Rural) vs. Tibet (Urban)	-41.306	7.57115e-154	1.38825e-149	0.001
USA (Urban) vs. Coyote (Rural)	Coyote (Rural) vs. Tibet (Urban)	-2.10776	0.0350718	1	0.038
USA (Urban) vs. Coyote (Urban)	Coyote (Rural) vs. Tibet (Urban)	-12.9187	4.35377e-37	7.98307e-33	0.001
USA (Urban) vs. Mayaguez (Urban)	Coyote (Rural) vs. Tibet (Urban)	11.3365	0	0	0.001
USA (Urban) vs. Mbalmayo (Semi-Urban)	Coyote (Rural) vs. Tibet (Urban)	-53.2461	0	0	0.001
USA (Urban) vs. all	Coyote (Rural) vs. Tibet (Urban)	-63.8186	0	0	0.001
USA (Urban) vs. all	Coyote (Rural) vs. Tibet (Urban)	-82.6649	0	0	0.001
USA (Urban) vs. Sparrow (Urban)	Coyote (Rural) vs. Tibet (Urban)	77.7343	0	0	0.001
USA (Urban) vs. Tibet (Rural)	Coyote (Rural) vs. Tibet (Urban)	-60.1605	0	0	0.001
USA (Urban) vs. Tibet (Urban)	Coyote (Rural) vs. Tibet (Urban)	-68.113	0	0	0.001
USA (Urban) vs. USA (Urban)	Coyote (Rural) vs. Tibet (Urban)	-90.3213	0	0	0.001
USA (Urban) vs. Venezuela (Rural)	Coyote (Rural) vs. Tibet (Urban)	-45.8102	0	0	0.001
Venezuela (Rural) vs. Venezuela (Rural)	Coyote (Rural) vs. Tibet (Urban)	-75.3998	0	0	0.001
Yaounde (Urban) vs. Coyote (Rural)	Coyote (Rural) vs. Tibet (Urban)	1.06549	0.286789	1	0.288
Yaounde (Urban) vs. Coyote (Urban)	Coyote (Rural) vs. Tibet (Urban)	-9.16446	5.36945e-19	9.84542e-15	0.001
Yaounde (Urban) vs. Mayaguez (Urban)	Coyote (Rural) vs. Tibet (Urban)	8.60234	0	0	0.001
Yaounde (Urban) vs. Mbalmayo (Semi-Urban)	Coyote (Rural) vs. Tibet (Urban)	-78.6865	0	0	0.001
Yaounde (Urban) vs. all	Coyote (Rural) vs. Tibet (Urban)	-61.0617	5.59284e-242	1.0255e-237	0.001
Yaounde (Urban) vs. all	Coyote (Rural) vs. Tibet (Urban)	-66.0724	0	0	0.001
Yaounde (Urban) vs. Sparrow (Urban)	Coyote (Rural) vs. Tibet (Urban)	41.0228	0	0	0.001
Yaounde (Urban) vs. Tibet (Rural)	Coyote (Rural) vs. Tibet (Urban)	-88.2929	0	0	0.001
Yaounde (Urban) vs. Tibet (Urban)	Coyote (Rural) vs. Tibet (Urban)	-76.6871	0	0	0.001
Yaounde (Urban) vs. USA (Urban)	Coyote (Rural) vs. Tibet (Urban)	-58.5111	0	0	0.001
Yaounde (Urban) vs. Venezuela (Rural)	Coyote (Rural) vs. Tibet (Urban)	-65.2899	0	0	0.001
Yaounde (Urban) vs. Yaounde (Urban)	Coyote (Rural) vs. Tibet (Urban)	-76.114	0	0	0.001
All between population	Coyote (Rural) vs. Venezuela (Rural)	-32.3388	7.01264e-229	1.28584e-224	0.001
All within population	Coyote (Rural) vs. Venezuela (Rural)	-160.09	0	0	0.001
Coyote (Rural) vs. Coyote (Rural)	Coyote (Rural) vs. Venezuela (Rural)	-117.317	0	0	0.001
Coyote (Rural) vs. Coyote (Urban)	Coyote (Rural) vs. Venezuela (Rural)	-90.8707	0	0	0.001
Coyote (Rural) vs. Mbalmayo (Semi-Urban)	Coyote (Rural) vs. Venezuela (Rural)	0.773195	0.439466	1	0.422
Coyote (Rural) vs. Sparrow (Urban)	Coyote (Rural) vs. Venezuela (Rural)	39.2516	0	0	0.001
Coyote (Urban) vs. Coyote (Urban)	Coyote (Rural) vs. Venezuela (Rural)	-59.6101	0	0	0.001
Malawi (Rural) vs. Coyote (Rural)	Coyote (Rural) vs. Venezuela (Rural)	8.34121	2.22045e-16	4.07141e-12	0.001
Malawi (Rural) vs. Coyote (Urban)	Coyote (Rural) vs. Venezuela (Rural)	-16.3338	4.44654e-57	8.15317e-53	0.001
Malawi (Rural) vs. Malawi (Rural)	Coyote (Rural) vs. Venezuela (Rural)	-204.193	0	0	0.001
Malawi (Rural) vs. Maricao (Rural)	Coyote (Rural) vs. Venezuela (Rural)	43.8884	0	0	0.001
Malawi (Rural) vs. Mayaguez (Urban)	Coyote (Rural) vs. Venezuela (Rural)	21.4662	0	0	0.001
Malawi (Rural) vs. Mbalmayo (Semi-Urban)	Coyote (Rural) vs. Venezuela (Rural)	-200.541	0	0	0.001
Malawi (Rural) vs. all	Coyote (Rural) vs. Venezuela (Rural)	-118.288	0	0	0.001
Malawi (Rural) vs. all	Coyote (Rural) vs. Venezuela (Rural)	-117.639	0	0	0.001
Malawi (Rural) vs. Sparrow (Rural)	Coyote (Rural) vs. Venezuela (Rural)	44.4558	0	0	0.001
Malawi (Rural) vs. Sparrow (Urban)	Coyote (Rural) vs. Venezuela (Rural)	59.2486	0	0	0.001
Malawi (Rural) vs. Tibet (Rural)	Coyote (Rural) vs. Venezuela (Rural)	-191.66	0	0	0.001
Malawi (Rural) vs. Tibet (Semi-Urban)	Coyote (Rural) vs. Venezuela (Rural)	-147.907	0	0	0.001
Malawi (Rural) vs. Tibet (Urban)	Coyote (Rural) vs. Venezuela (Rural)	-142.559	0	0	0.001
Malawi (Rural) vs. USA (Urban)	Coyote (Rural) vs. Venezuela (Rural)	-118.949	0	0	0.001
Malawi (Rural) vs. Venezuela (Rural)	Coyote (Rural) vs. Venezuela (Rural)	-185.867	0	0	0.001
Malawi (Rural) vs. Yaounde (Urban)	Coyote (Rural) vs. Venezuela (Rural)	-165.645	0	0	0.001
Maricao (Rural) (non-cristatellus)noncristatellus vs. Coyote (Rural)	Coyote (Rural) vs. Venezuela (Rural)	47.4171	0	0	0.001
Maricao (Rural) (non-cristatellus)noncristatellus vs. Coyote (Urban)	Coyote (Rural) vs. Venezuela (Rural)	18.4354	0	0	0.001
Maricao (Rural) (non-cristatellus)noncristatellus vs. Malawi (Rural)	Coyote (Rural) vs. Venezuela (Rural)	45.9456	0	0	0.001
Maricao (Rural) (non-cristatellus)noncristatellus vs. Maricao (Rural)	Coyote (Rural) vs. Venezuela (Rural)	-123.011	0	0	0.001
Maricao (Rural) (non-cristatellus)noncristatellus vs. Maricao (Rural) (non-cristatellus)noncristatellus	Coyote (Rural) vs. Venezuela (Rural)	-137.914	0	0	0.001
Maricao (Rural) (non-cristatellus)noncristatellus vs. Mayaguez (Urban)	Coyote (Rural) vs. Venezuela (Rural)	-116.528	0	0	0.001
Maricao (Rural) (non-cristatellus)noncristatellus vs. Mbalmayo (Semi-Urban)	Coyote (Rural) vs. Venezuela (Rural)	21.9348	0	0	0.001
Maricao (Rural) (non-cristatellus)noncristatellus vs. all	Coyote (Rural) vs. Venezuela (Rural)	9.84194	0	0	0.001
Maricao (Rural) (non-cristatellus)noncristatellus vs. all	Coyote (Rural) vs. Venezuela (Rural)	12.7022	0	0	0.001
Maricao (Rural) (non-cristatellus)noncristatellus vs. Sparrow (Rural)	Coyote (Rural) vs. Venezuela (Rural)	37.2917	0	0	0.001
Maricao (Rural) (non-cristatellus)noncristatellus vs. Sparrow (Urban)	Coyote (Rural) vs. Venezuela (Rural)	51.8013	0	0	0.001
Maricao (Rural) (non-cristatellus)noncristatellus vs. Tibet (Rural)	Coyote (Rural) vs. Venezuela (Rural)	18.1303	0	0	0.001
Maricao (Rural) (non-cristatellus)noncristatellus vs. Tibet (Semi-Urban)	Coyote (Rural) vs. Venezuela (Rural)	14.1921	0	0	0.001
Maricao (Rural) (non-cristatellus)noncristatellus vs. Tibet (Urban)	Coyote (Rural) vs. Venezuela (Rural)	12.6145	0	0	0.001
Maricao (Rural) (non-cristatellus)noncristatellus vs. USA (Urban)	Coyote (Rural) vs. Venezuela (Rural)	24.1627	0	0	0.001
Maricao (Rural) (non-cristatellus)noncristatellus vs. Venezuela (Rural)	Coyote (Rural) vs. Venezuela (Rural)	36.1679	0	0	0.001
Maricao (Rural) (non-cristatellus)noncristatellus vs. Yaounde (Urban)	Coyote (Rural) vs. Venezuela (Rural)	15.0427	0	0	0.001
Maricao (Rural) vs. Coyote (Rural)	Coyote (Rural) vs. Venezuela (Rural)	45.088	0	0	0.001
Maricao (Rural) vs. Coyote (Urban)	Coyote (Rural) vs. Venezuela (Rural)	17.7197	0	0	0.001
Maricao (Rural) vs. Maricao (Rural)	Coyote (Rural) vs. Venezuela (Rural)	-119.884	0	0	0.001
Maricao (Rural) vs. Mayaguez (Urban)	Coyote (Rural) vs. Venezuela (Rural)	-136.91	0	0	0.001
Maricao (Rural) vs. Mbalmayo (Semi-Urban)	Coyote (Rural) vs. Venezuela (Rural)	20.3922	0	0	0.001
Maricao (Rural) vs. all	Coyote (Rural) vs. Venezuela (Rural)	9.43027	0	0	0.001
Maricao (Rural) vs. all	Coyote (Rural) vs. Venezuela (Rural)	9.5795	0	0	0.001
Maricao (Rural) vs. Sparrow (Urban)	Coyote (Rural) vs. Venezuela (Rural)	54.0577	0	0	0.001
Maricao (Rural) vs. Tibet (Rural)	Coyote (Rural) vs. Venezuela (Rural)	18.2255	0	0	0.001
Maricao (Rural) vs. Tibet (Semi-Urban)	Coyote (Rural) vs. Venezuela (Rural)	13.6191	0	0	0.001
Maricao (Rural) vs. Tibet (Urban)	Coyote (Rural) vs. Venezuela (Rural)	12.1335	0	0	0.001
Maricao (Rural) vs. USA (Urban)	Coyote (Rural) vs. Venezuela (Rural)	16.3253	0	0	0.001
Maricao (Rural) vs. Venezuela (Rural)	Coyote (Rural) vs. Venezuela (Rural)	34.5372	0	0	0.001
Maricao (Rural) vs. Yaounde (Urban)	Coyote (Rural) vs. Venezuela (Rural)	11.8272	0	0	0.001
Mayaguez (Urban) vs. Mayaguez (Urban)	Coyote (Rural) vs. Venezuela (Rural)	-86.1784	0	0	0.001
Mbalmayo (Semi-Urban) vs. Mbalmayo (Semi-Urban)	Coyote (Rural) vs. Venezuela (Rural)	-167.609	0	0	0.001
Ngoantet (Rural) vs. Coyote (Rural)	Coyote (Rural) vs. Venezuela (Rural)	-0.505764	0.613041	1	0.632
Ngoantet (Rural) vs. Coyote (Urban)	Coyote (Rural) vs. Venezuela (Rural)	-19.8615	3.77692e-82	6.92536e-78	0.001
Ngoantet (Rural) vs. Malawi (Rural)	Coyote (Rural) vs. Venezuela (Rural)	-200.955	0	0	0.001
Ngoantet (Rural) vs. Maricao (Rural)	Coyote (Rural) vs. Venezuela (Rural)	37.2404	0	0	0.001
Ngoantet (Rural) vs. Maricao (Rural) (non-cristatellus)noncristatellus	Coyote (Rural) vs. Venezuela (Rural)	42.002	0	0	0.001
Ngoantet (Rural) vs. Mayaguez (Urban)	Coyote (Rural) vs. Venezuela (Rural)	16.4363	0	0	0.001
Ngoantet (Rural) vs. Mbalmayo (Semi-Urban)	Coyote (Rural) vs. Venezuela (Rural)	-203.729	0	0	0.001
Ngoantet (Rural) vs. all	Coyote (Rural) vs. Venezuela (Rural)	-137.128	0	0	0.001
Ngoantet (Rural) vs. all	Coyote (Rural) vs. Venezuela (Rural)	-130.609	0	0	0.001
Ngoantet (Rural) vs. Ngoantet (Rural)	Coyote (Rural) vs. Venezuela (Rural)	-197.318	0	0	0.001
Ngoantet (Rural) vs. Sparrow (Rural)	Coyote (Rural) vs. Venezuela (Rural)	47.962	0	0	0.001
Ngoantet (Rural) vs. Sparrow (Urban)	Coyote (Rural) vs. Venezuela (Rural)	62.1107	0	0	0.001
Ngoantet (Rural) vs. Tibet (Rural)	Coyote (Rural) vs. Venezuela (Rural)	-214.615	0	0	0.001
Ngoantet (Rural) vs. Tibet (Semi-Urban)	Coyote (Rural) vs. Venezuela (Rural)	-159.229	0	0	0.001
Ngoantet (Rural) vs. Tibet (Urban)	Coyote (Rural) vs. Venezuela (Rural)	-163.991	0	0	0.001
Ngoantet (Rural) vs. USA (Urban)	Coyote (Rural) vs. Venezuela (Rural)	-128.272	0	0	0.001
Ngoantet (Rural) vs. Venezuela (Rural)	Coyote (Rural) vs. Venezuela (Rural)	-173.536	0	0	0.001
Ngoantet (Rural) vs. Yaounde (Urban)	Coyote (Rural) vs. Venezuela (Rural)	-172.022	0	0	0.001
Sparrow (Rural) vs. Coyote (Rural)	Coyote (Rural) vs. Venezuela (Rural)	26.7891	0	0	0.001
Sparrow (Rural) vs. Coyote (Urban)	Coyote (Rural) vs. Venezuela (Rural)	14.4362	0	0	0.001
Sparrow (Rural) vs. Maricao (Rural)	Coyote (Rural) vs. Venezuela (Rural)	38.7831	0	0	0.001
Sparrow (Rural) vs. Mayaguez (Urban)	Coyote (Rural) vs. Venezuela (Rural)	20.1825	0	0	0.001
Sparrow (Rural) vs. Mbalmayo (Semi-Urban)	Coyote (Rural) vs. Venezuela (Rural)	25.9813	0	0	0.001
Sparrow (Rural) vs. all	Coyote (Rural) vs. Venezuela (Rural)	11.2287	0	0	0.001
Sparrow (Rural) vs. all	Coyote (Rural) vs. Venezuela (Rural)	34.2553	0	0	0.001
Sparrow (Rural) vs. Sparrow (Rural)	Coyote (Rural) vs. Venezuela (Rural)	-74.5894	0	0	0.001
Sparrow (Rural) vs. Sparrow (Urban)	Coyote (Rural) vs. Venezuela (Rural)	-91.4519	0	0	0.001
Sparrow (Rural) vs. Tibet (Rural)	Coyote (Rural) vs. Venezuela (Rural)	17.9802	0	0	0.001
Sparrow (Rural) vs. Tibet (Semi-Urban)	Coyote (Rural) vs. Venezuela (Rural)	17.7062	0	0	0.001
Sparrow (Rural) vs. Tibet (Urban)	Coyote (Rural) vs. Venezuela (Rural)	13.6301	0	0	0.001
Sparrow (Rural) vs. USA (Urban)	Coyote (Rural) vs. Venezuela (Rural)	73.8443	0	0	0.001
Sparrow (Rural) vs. Venezuela (Rural)	Coyote (Rural) vs. Venezuela (Rural)	32.966	0	0	0.001
Sparrow (Rural) vs. Yaounde (Urban)	Coyote (Rural) vs. Venezuela (Rural)	29.2379	0	0	0.001
Sparrow (Urban) vs. Sparrow (Urban)	Coyote (Rural) vs. Venezuela (Rural)	-86.4243	0	0	0.001
Tibet (Rural) vs. Tibet (Rural)	Coyote (Rural) vs. Venezuela (Rural)	-93.7747	0	0	0.001
Tibet (Semi-Urban) vs. Coyote (Rural)	Coyote (Rural) vs. Venezuela (Rural)	-9.25255	4.71676e-20	8.64865e-16	0.001
Tibet (Semi-Urban) vs. Coyote (Urban)	Coyote (Rural) vs. Venezuela (Rural)	-16.7318	5.18221e-59	9.50209e-55	0.001
Tibet (Semi-Urban) vs. Mayaguez (Urban)	Coyote (Rural) vs. Venezuela (Rural)	5.41642	6.79247e-08	0.00124547	0.001
Tibet (Semi-Urban) vs. Mbalmayo (Semi-Urban)	Coyote (Rural) vs. Venezuela (Rural)	-128.982	0	0	0.001
Tibet (Semi-Urban) vs. all	Coyote (Rural) vs. Venezuela (Rural)	-75.1523	0	0	0.001
Tibet (Semi-Urban) vs. all	Coyote (Rural) vs. Venezuela (Rural)	-120.811	0	0	0.001
Tibet (Semi-Urban) vs. Sparrow (Urban)	Coyote (Rural) vs. Venezuela (Rural)	24.3821	0	0	0.001
Tibet (Semi-Urban) vs. Tibet (Rural)	Coyote (Rural) vs. Venezuela (Rural)	-116.718	0	0	0.001
Tibet (Semi-Urban) vs. Tibet (Semi-Urban)	Coyote (Rural) vs. Venezuela (Rural)	-80.0684	0	0	0.001
Tibet (Semi-Urban) vs. Tibet (Urban)	Coyote (Rural) vs. Venezuela (Rural)	-104.777	0	0	0.001
Tibet (Semi-Urban) vs. USA (Urban)	Coyote (Rural) vs. Venezuela (Rural)	-150.81	0	0	0.001
Tibet (Semi-Urban) vs. Venezuela (Rural)	Coyote (Rural) vs. Venezuela (Rural)	-127.228	0	0	0.001
Tibet (Semi-Urban) vs. Yaounde (Urban)	Coyote (Rural) vs. Venezuela (Rural)	-141.401	0	0	0.001
Tibet (Urban) vs. Tibet (Urban)	Coyote (Rural) vs. Venezuela (Rural)	-70.1367	0	0	0.001
USA (Urban) vs. Coyote (Rural)	Coyote (Rural) vs. Venezuela (Rural)	-21.6961	1.14165e-102	2.09333e-98	0.001
USA (Urban) vs. Coyote (Urban)	Coyote (Rural) vs. Venezuela (Rural)	-37.055	9.87337e-261	1.81038e-256	0.001
USA (Urban) vs. Mayaguez (Urban)	Coyote (Rural) vs. Venezuela (Rural)	-6.18422	6.82779e-10	1.25194e-05	0.001
USA (Urban) vs. Mbalmayo (Semi-Urban)	Coyote (Rural) vs. Venezuela (Rural)	-122.98	0	0	0.001
USA (Urban) vs. all	Coyote (Rural) vs. Venezuela (Rural)	-140.185	0	0	0.001
USA (Urban) vs. all	Coyote (Rural) vs. Venezuela (Rural)	-187.246	0	0	0.001
USA (Urban) vs. Sparrow (Urban)	Coyote (Rural) vs. Venezuela (Rural)	88.7523	0	0	0.001
USA (Urban) vs. Tibet (Rural)	Coyote (Rural) vs. Venezuela (Rural)	-136.109	0	0	0.001
USA (Urban) vs. Tibet (Urban)	Coyote (Rural) vs. Venezuela (Rural)	-152.986	0	0	0.001
USA (Urban) vs. USA (Urban)	Coyote (Rural) vs. Venezuela (Rural)	-204.362	0	0	0.001
USA (Urban) vs. Venezuela (Rural)	Coyote (Rural) vs. Venezuela (Rural)	-107.19	0	0	0.001
Venezuela (Rural) vs. Venezuela (Rural)	Coyote (Rural) vs. Venezuela (Rural)	-164.762	0	0	0.001
Yaounde (Urban) vs. Coyote (Rural)	Coyote (Rural) vs. Venezuela (Rural)	-13.4125	4.95513e-40	9.08573e-36	0.001
Yaounde (Urban) vs. Coyote (Urban)	Coyote (Rural) vs. Venezuela (Rural)	-24.3592	1.35145e-116	2.47801e-112	0.001
Yaounde (Urban) vs. Mayaguez (Urban)	Coyote (Rural) vs. Venezuela (Rural)	2.06728	0.0388215	1	0.04
Yaounde (Urban) vs. Mbalmayo (Semi-Urban)	Coyote (Rural) vs. Venezuela (Rural)	-169.547	0	0	0.001
Yaounde (Urban) vs. all	Coyote (Rural) vs. Venezuela (Rural)	-114.498	0	0	0.001
Yaounde (Urban) vs. all	Coyote (Rural) vs. Venezuela (Rural)	-143.152	0	0	0.001
Yaounde (Urban) vs. Sparrow (Urban)	Coyote (Rural) vs. Venezuela (Rural)	38.5101	0	0	0.001
Yaounde (Urban) vs. Tibet (Rural)	Coyote (Rural) vs. Venezuela (Rural)	-168.338	0	0	0.001
Yaounde (Urban) vs. Tibet (Urban)	Coyote (Rural) vs. Venezuela (Rural)	-144.928	0	0	0.001
Yaounde (Urban) vs. USA (Urban)	Coyote (Rural) vs. Venezuela (Rural)	-134.53	0	0	0.001
Yaounde (Urban) vs. Venezuela (Rural)	Coyote (Rural) vs. Venezuela (Rural)	-145.146	0	0	0.001
Yaounde (Urban) vs. Yaounde (Urban)	Coyote (Rural) vs. Venezuela (Rural)	-160.651	0	0	0.001
All between population	Coyote (Urban) vs. Coyote (Urban)	8.79604	0	0	0.001
All within population	Coyote (Urban) vs. Coyote (Urban)	-4.59033	4.44042e-06	0.0814195	0.001
Coyote (Rural) vs. Coyote (Rural)	Coyote (Urban) vs. Coyote (Urban)	-3.14868	0.00167553	1	0.003
Malawi (Rural) vs. Malawi (Rural)	Coyote (Urban) vs. Coyote (Urban)	-7.69686	2.53924e-14	4.65596e-10	0.001
Maricao (Rural) (non-cristatellus)noncristatellus vs. Maricao (Rural) (non-cristatellus)noncristatellus	Coyote (Urban) vs. Coyote (Urban)	-1.8621	0.0631664	1	0.067
Maricao (Rural) vs. Maricao (Rural)	Coyote (Urban) vs. Coyote (Urban)	0.55885	0.576471	1	0.562
Ngoantet (Rural) vs. Ngoantet (Rural)	Coyote (Urban) vs. Coyote (Urban)	-6.06528	1.47948e-09	2.71278e-05	0.001
Sparrow (Rural) vs. Sparrow (Rural)	Coyote (Urban) vs. Coyote (Urban)	13.3229	0	0	0.001
Tibet (Semi-Urban) vs. Tibet (Semi-Urban)	Coyote (Urban) vs. Coyote (Urban)	-1.8432	0.0694737	1	0.061
USA (Urban) vs. USA (Urban)	Coyote (Urban) vs. Coyote (Urban)	-6.7309	1.72133e-11	3.15622e-07	0.001
Yaounde (Urban) vs. Yaounde (Urban)	Coyote (Urban) vs. Coyote (Urban)	-4.17995	3.50614e-05	0.642885	0.001
All between population	Coyote (Urban) vs. Mayaguez (Urban)	-8.35286	6.70177e-17	1.22884e-12	0.001
All within population	Coyote (Urban) vs. Mayaguez (Urban)	-37.6034	1.52136e-303	2.78956e-299	0.001
Coyote (Rural) vs. Coyote (Rural)	Coyote (Urban) vs. Mayaguez (Urban)	-28.0707	2.32322e-138	4.25986e-134	0.001
Coyote (Rural) vs. Coyote (Urban)	Coyote (Urban) vs. Mayaguez (Urban)	-22.3582	1.38168e-81	2.53344e-77	0.001
Coyote (Rural) vs. Mayaguez (Urban)	Coyote (Urban) vs. Mayaguez (Urban)	2.18963	0.0289241	1	0.027
Coyote (Rural) vs. Mbalmayo (Semi-Urban)	Coyote (Urban) vs. Mayaguez (Urban)	-5.74056	1.19661e-08	0.00021941	0.001
Coyote (Rural) vs. all	Coyote (Urban) vs. Mayaguez (Urban)	-6.23108	6.18324e-10	1.13376e-05	0.001
Coyote (Rural) vs. Sparrow (Urban)	Coyote (Urban) vs. Mayaguez (Urban)	3.95414	7.89099e-05	1	0.001
Coyote (Rural) vs. Tibet (Rural)	Coyote (Urban) vs. Mayaguez (Urban)	-8.61501	8.63406e-17	1.58314e-12	0.001
Coyote (Rural) vs. Tibet (Urban)	Coyote (Urban) vs. Mayaguez (Urban)	-9.44919	1.20012e-19	2.20054e-15	0.001
Coyote (Rural) vs. Venezuela (Rural)	Coyote (Urban) vs. Mayaguez (Urban)	-7.03471	2.70154e-12	4.95355e-08	0.001
Coyote (Urban) vs. Coyote (Urban)	Coyote (Urban) vs. Mayaguez (Urban)	-18.6471	4.06676e-40	7.45682e-36	0.001
Coyote (Urban) vs. Mbalmayo (Semi-Urban)	Coyote (Urban) vs. Mayaguez (Urban)	-6.53327	2.65999e-10	4.87735e-06	0.001
Coyote (Urban) vs. Sparrow (Urban)	Coyote (Urban) vs. Mayaguez (Urban)	4.76706	2.37809e-06	0.0436046	0.001
Coyote (Urban) vs. Venezuela (Rural)	Coyote (Urban) vs. Mayaguez (Urban)	-6.28182	7.53326e-10	1.3813e-05	0.001
Malawi (Rural) vs. Coyote (Rural)	Coyote (Urban) vs. Mayaguez (Urban)	-4.47157	8.06214e-06	0.147827	0.001
Malawi (Rural) vs. Coyote (Urban)	Coyote (Urban) vs. Mayaguez (Urban)	-5.67368	2.1212e-08	0.000388944	0.001
Malawi (Rural) vs. Malawi (Rural)	Coyote (Urban) vs. Mayaguez (Urban)	-50.018	0	0	0.001
Malawi (Rural) vs. Maricao (Rural)	Coyote (Urban) vs. Mayaguez (Urban)	10.1663	0	0	0.001
Malawi (Rural) vs. Mayaguez (Urban)	Coyote (Urban) vs. Mayaguez (Urban)	5.19695	2.73036e-07	0.00500638	0.001
Malawi (Rural) vs. Mbalmayo (Semi-Urban)	Coyote (Urban) vs. Mayaguez (Urban)	-51.0621	2.26369e-306	4.1507e-302	0.001
Malawi (Rural) vs. all	Coyote (Urban) vs. Mayaguez (Urban)	-36.7119	1.22182e-115	2.24032e-111	0.001
Malawi (Rural) vs. all	Coyote (Urban) vs. Mayaguez (Urban)	-30.4748	9.57006e-157	1.75477e-152	0.001
Malawi (Rural) vs. Sparrow (Rural)	Coyote (Urban) vs. Mayaguez (Urban)	17.4309	0	0	0.001
Malawi (Rural) vs. Sparrow (Urban)	Coyote (Urban) vs. Mayaguez (Urban)	16.8255	0	0	0.001
Malawi (Rural) vs. Tibet (Rural)	Coyote (Urban) vs. Mayaguez (Urban)	-62.4156	2.06482e-246	3.78605e-242	0.001
Malawi (Rural) vs. Tibet (Semi-Urban)	Coyote (Urban) vs. Mayaguez (Urban)	-43.3759	1.66615e-176	3.05505e-172	0.001
Malawi (Rural) vs. Tibet (Urban)	Coyote (Urban) vs. Mayaguez (Urban)	-45.3042	2.15177e-184	3.94549e-180	0.001
Malawi (Rural) vs. USA (Urban)	Coyote (Urban) vs. Mayaguez (Urban)	-29.1334	1.5008e-180	2.75187e-176	0.001
Malawi (Rural) vs. Venezuela (Rural)	Coyote (Urban) vs. Mayaguez (Urban)	-45.1504	1.1050825051e-313	0	0.001
Malawi (Rural) vs. Yaounde (Urban)	Coyote (Urban) vs. Mayaguez (Urban)	-40.8943	1.19908e-253	2.19864e-249	0.001
Maricao (Rural) (non-cristatellus)noncristatellus vs. Coyote (Rural)	Coyote (Urban) vs. Mayaguez (Urban)	13.2676	0	0	0.001
Maricao (Rural) (non-cristatellus)noncristatellus vs. Coyote (Urban)	Coyote (Urban) vs. Mayaguez (Urban)	6.87639	2.31393e-11	4.24282e-07	0.001
Maricao (Rural) (non-cristatellus)noncristatellus vs. Malawi (Rural)	Coyote (Urban) vs. Mayaguez (Urban)	13.2259	0	0	0.001
Maricao (Rural) (non-cristatellus)noncristatellus vs. Maricao (Rural)	Coyote (Urban) vs. Mayaguez (Urban)	-30.872	5.45393e-153	1.00003e-148	0.001
Maricao (Rural) (non-cristatellus)noncristatellus vs. Maricao (Rural) (non-cristatellus)noncristatellus	Coyote (Urban) vs. Mayaguez (Urban)	-35.9752	4.87771e-148	8.94377e-144	0.001
Maricao (Rural) (non-cristatellus)noncristatellus vs. Mayaguez (Urban)	Coyote (Urban) vs. Mayaguez (Urban)	-36.2904	8.41008e-130	1.54207e-125	0.001
Maricao (Rural) (non-cristatellus)noncristatellus vs. Mbalmayo (Semi-Urban)	Coyote (Urban) vs. Mayaguez (Urban)	3.73078	0.00020532	1	0.001
Maricao (Rural) (non-cristatellus)noncristatellus vs. all	Coyote (Urban) vs. Mayaguez (Urban)	3.01742	0.00284693	1	0.003
Maricao (Rural) (non-cristatellus)noncristatellus vs. all	Coyote (Urban) vs. Mayaguez (Urban)	-3.85695	0.000123569	1	0.001
Maricao (Rural) (non-cristatellus)noncristatellus vs. Sparrow (Rural)	Coyote (Urban) vs. Mayaguez (Urban)	21.093	0	0	0.001
Maricao (Rural) (non-cristatellus)noncristatellus vs. Sparrow (Urban)	Coyote (Urban) vs. Mayaguez (Urban)	22.9267	0	0	0.001
Maricao (Rural) (non-cristatellus)noncristatellus vs. Tibet (Rural)	Coyote (Urban) vs. Mayaguez (Urban)	8.91667	0	0	0.001
Maricao (Rural) (non-cristatellus)noncristatellus vs. Tibet (Semi-Urban)	Coyote (Urban) vs. Mayaguez (Urban)	3.50412	0.000518314	1	0.001
Maricao (Rural) (non-cristatellus)noncristatellus vs. Tibet (Urban)	Coyote (Urban) vs. Mayaguez (Urban)	1.82714	0.06854	1	0.061
Maricao (Rural) (non-cristatellus)noncristatellus vs. USA (Urban)	Coyote (Urban) vs. Mayaguez (Urban)	-5.18359	2.23599e-07	0.00409991	0.001
Maricao (Rural) (non-cristatellus)noncristatellus vs. Venezuela (Rural)	Coyote (Urban) vs. Mayaguez (Urban)	8.89254	0	0	0.001
Maricao (Rural) (non-cristatellus)noncristatellus vs. Yaounde (Urban)	Coyote (Urban) vs. Mayaguez (Urban)	-2.52456	0.0117386	1	0.011
Maricao (Rural) vs. Coyote (Rural)	Coyote (Urban) vs. Mayaguez (Urban)	10.0888	0	0	0.001
Maricao (Rural) vs. Coyote (Urban)	Coyote (Urban) vs. Mayaguez (Urban)	5.08559	5.44347e-07	0.00998114	0.001
Maricao (Rural) vs. Maricao (Rural)	Coyote (Urban) vs. Mayaguez (Urban)	-30.8089	8.72764e-130	1.6003e-125	0.001
Maricao (Rural) vs. Mayaguez (Urban)	Coyote (Urban) vs. Mayaguez (Urban)	-41.0777	2.54211e-152	4.66122e-148	0.001
Maricao (Rural) vs. Mbalmayo (Semi-Urban)	Coyote (Urban) vs. Mayaguez (Urban)	1.66802	0.0956982	1	0.101
Maricao (Rural) vs. all	Coyote (Urban) vs. Mayaguez (Urban)	1.74322	0.0826093	1	0.088
Maricao (Rural) vs. all	Coyote (Urban) vs. Mayaguez (Urban)	-6.03812	2.26525e-09	4.15357e-05	0.001
Maricao (Rural) vs. Sparrow (Urban)	Coyote (Urban) vs. Mayaguez (Urban)	24.3128	0	0	0.001
Maricao (Rural) vs. Tibet (Rural)	Coyote (Urban) vs. Mayaguez (Urban)	7.96678	2.02061e-14	3.70498e-10	0.001
Maricao (Rural) vs. Tibet (Semi-Urban)	Coyote (Urban) vs. Mayaguez (Urban)	2.29498	0.0222935	1	0.02
Maricao (Rural) vs. Tibet (Urban)	Coyote (Urban) vs. Mayaguez (Urban)	0.689714	0.490807	1	0.507
Maricao (Rural) vs. USA (Urban)	Coyote (Urban) vs. Mayaguez (Urban)	-6.79573	1.15648e-11	2.12052e-07	0.001
Maricao (Rural) vs. Venezuela (Rural)	Coyote (Urban) vs. Mayaguez (Urban)	6.6371	4.57276e-11	8.38462e-07	0.001
Maricao (Rural) vs. Yaounde (Urban)	Coyote (Urban) vs. Mayaguez (Urban)	-4.3645	1.39587e-05	0.255947	0.001
Mayaguez (Urban) vs. Mayaguez (Urban)	Coyote (Urban) vs. Mayaguez (Urban)	-76.4076	7.85778e-118	1.4408e-113	0.001
Mbalmayo (Semi-Urban) vs. Mbalmayo (Semi-Urban)	Coyote (Urban) vs. Mayaguez (Urban)	-51.9011	2.52627e-154	4.63217e-150	0.001
Ngoantet (Rural) vs. Coyote (Rural)	Coyote (Urban) vs. Mayaguez (Urban)	-6.07435	1.35649e-09	2.48726e-05	0.001
Ngoantet (Rural) vs. Coyote (Urban)	Coyote (Urban) vs. Mayaguez (Urban)	-6.53699	1.06339e-10	1.94984e-06	0.001
Ngoantet (Rural) vs. Malawi (Rural)	Coyote (Urban) vs. Mayaguez (Urban)	-48.2484	0	0	0.001
Ngoantet (Rural) vs. Maricao (Rural)	Coyote (Urban) vs. Mayaguez (Urban)	2.2729	0.0231088	1	0.024
Ngoantet (Rural) vs. Maricao (Rural) (non-cristatellus)noncristatellus	Coyote (Urban) vs. Mayaguez (Urban)	5.50156	4.14463e-08	0.000759959	0.001
Ngoantet (Rural) vs. Mayaguez (Urban)	Coyote (Urban) vs. Mayaguez (Urban)	-2.08187	0.0376439	1	0.04
Ngoantet (Rural) vs. Mbalmayo (Semi-Urban)	Coyote (Urban) vs. Mayaguez (Urban)	-50.0641	0	0	0.001
Ngoantet (Rural) vs. all	Coyote (Urban) vs. Mayaguez (Urban)	-40.0909	6.13779e-144	1.12543e-139	0.001
Ngoantet (Rural) vs. all	Coyote (Urban) vs. Mayaguez (Urban)	-33.1239	1.22203e-191	2.24072e-187	0.001
Ngoantet (Rural) vs. Ngoantet (Rural)	Coyote (Urban) vs. Mayaguez (Urban)	-47.325	0	0	0.001
Ngoantet (Rural) vs. Sparrow (Rural)	Coyote (Urban) vs. Mayaguez (Urban)	12.3604	0	0	0.001
Ngoantet (Rural) vs. Sparrow (Urban)	Coyote (Urban) vs. Mayaguez (Urban)	11.6628	0	0	0.001
Ngoantet (Rural) vs. Tibet (Rural)	Coyote (Urban) vs. Mayaguez (Urban)	-63.5164	8.80715e-298	1.61488e-293	0.001
Ngoantet (Rural) vs. Tibet (Semi-Urban)	Coyote (Urban) vs. Mayaguez (Urban)	-43.4578	1.07789e-203	1.97643e-199	0.001
Ngoantet (Rural) vs. Tibet (Urban)	Coyote (Urban) vs. Mayaguez (Urban)	-48.7104	2.23024e-230	4.08937e-226	0.001
Ngoantet (Rural) vs. USA (Urban)	Coyote (Urban) vs. Mayaguez (Urban)	-31.3004	1.98698e-209	3.64333e-205	0.001
Ngoantet (Rural) vs. Venezuela (Rural)	Coyote (Urban) vs. Mayaguez (Urban)	-41.8514	3.97462e-303	7.28787e-299	0.001
Ngoantet (Rural) vs. Yaounde (Urban)	Coyote (Urban) vs. Mayaguez (Urban)	-41.6547	9.21109e-285	1.68895e-280	0.001
Sparrow (Rural) vs. Coyote (Rural)	Coyote (Urban) vs. Mayaguez (Urban)	2.38901	0.0170362	1	0.017
Sparrow (Rural) vs. Coyote (Urban)	Coyote (Urban) vs. Mayaguez (Urban)	4.13933	4.43331e-05	0.812892	0.001
Sparrow (Rural) vs. Maricao (Rural)	Coyote (Urban) vs. Mayaguez (Urban)	20.2124	0	0	0.001
Sparrow (Rural) vs. Mayaguez (Urban)	Coyote (Urban) vs. Mayaguez (Urban)	14.2126	0	0	0.001
Sparrow (Rural) vs. Mbalmayo (Semi-Urban)	Coyote (Urban) vs. Mayaguez (Urban)	11.5426	0	0	0.001
Sparrow (Rural) vs. all	Coyote (Urban) vs. Mayaguez (Urban)	7.43955	3.39084e-12	6.21745e-08	0.001
Sparrow (Rural) vs. all	Coyote (Urban) vs. Mayaguez (Urban)	23.5267	0	0	0.001
Sparrow (Rural) vs. Sparrow (Rural)	Coyote (Urban) vs. Mayaguez (Urban)	-30.9415	2.57749e-102	4.72608e-98	0.001
Sparrow (Rural) vs. Sparrow (Urban)	Coyote (Urban) vs. Mayaguez (Urban)	-30.8775	6.7142e-154	1.23112e-149	0.001
Sparrow (Rural) vs. Tibet (Rural)	Coyote (Urban) vs. Mayaguez (Urban)	13.0248	0	0	0.001
Sparrow (Rural) vs. Tibet (Semi-Urban)	Coyote (Urban) vs. Mayaguez (Urban)	11.8143	0	0	0.001
Sparrow (Rural) vs. Tibet (Urban)	Coyote (Urban) vs. Mayaguez (Urban)	4.70384	4.00287e-06	0.0733966	0.001
Sparrow (Rural) vs. USA (Urban)	Coyote (Urban) vs. Mayaguez (Urban)	12.694	0	0	0.001
Sparrow (Rural) vs. Venezuela (Rural)	Coyote (Urban) vs. Mayaguez (Urban)	9.831	0	0	0.001
Sparrow (Rural) vs. Yaounde (Urban)	Coyote (Urban) vs. Mayaguez (Urban)	10.1191	0	0	0.001
Sparrow (Urban) vs. Sparrow (Urban)	Coyote (Urban) vs. Mayaguez (Urban)	-29.942	5.73105e-147	1.05085e-142	0.001
Tibet (Rural) vs. Tibet (Rural)	Coyote (Urban) vs. Mayaguez (Urban)	-34.3023	9.16059e-66	1.67968e-61	0.001
Tibet (Semi-Urban) vs. Coyote (Rural)	Coyote (Urban) vs. Mayaguez (Urban)	-9.4378	1.3166e-19	2.41412e-15	0.001
Tibet (Semi-Urban) vs. Coyote (Urban)	Coyote (Urban) vs. Mayaguez (Urban)	-8.57734	4.63527e-15	8.49923e-11	0.001
Tibet (Semi-Urban) vs. Mayaguez (Urban)	Coyote (Urban) vs. Mayaguez (Urban)	-1.2197	0.224192	1	0.22
Tibet (Semi-Urban) vs. Mbalmayo (Semi-Urban)	Coyote (Urban) vs. Mayaguez (Urban)	-43.0153	8.41521e-122	1.54301e-117	0.001
Tibet (Semi-Urban) vs. all	Coyote (Urban) vs. Mayaguez (Urban)	-44.233	3.17123e-80	5.81476e-76	0.001
Tibet (Semi-Urban) vs. all	Coyote (Urban) vs. Mayaguez (Urban)	-44.17	8.59245e-131	1.57551e-126	0.001
Tibet (Semi-Urban) vs. Sparrow (Urban)	Coyote (Urban) vs. Mayaguez (Urban)	13.6613	0	0	0.001
Tibet (Semi-Urban) vs. Tibet (Rural)	Coyote (Urban) vs. Mayaguez (Urban)	-50.9436	1.26384e-101	2.31738e-97	0.001
Tibet (Semi-Urban) vs. Tibet (Semi-Urban)	Coyote (Urban) vs. Mayaguez (Urban)	-50.3612	2.47686e-85	4.54156e-81	0.001
Tibet (Semi-Urban) vs. Tibet (Urban)	Coyote (Urban) vs. Mayaguez (Urban)	-52.5526	1.09127e-103	2.00096e-99	0.001
Tibet (Semi-Urban) vs. USA (Urban)	Coyote (Urban) vs. Mayaguez (Urban)	-37.8336	1.38728e-234	2.54372e-230	0.001
Tibet (Semi-Urban) vs. Venezuela (Rural)	Coyote (Urban) vs. Mayaguez (Urban)	-36.947	2.54784e-131	4.67172e-127	0.001
Tibet (Semi-Urban) vs. Yaounde (Urban)	Coyote (Urban) vs. Mayaguez (Urban)	-44.496	1.72822e-141	3.16887e-137	0.001
Tibet (Urban) vs. Tibet (Urban)	Coyote (Urban) vs. Mayaguez (Urban)	-33.959	2.87738e-65	5.27597e-61	0.001
USA (Urban) vs. Coyote (Rural)	Coyote (Urban) vs. Mayaguez (Urban)	-9.31939	1.37395e-20	2.51927e-16	0.001
USA (Urban) vs. Coyote (Urban)	Coyote (Urban) vs. Mayaguez (Urban)	-11.2242	1.59505e-28	2.92468e-24	0.001
USA (Urban) vs. Mayaguez (Urban)	Coyote (Urban) vs. Mayaguez (Urban)	-12.9952	2.36277e-37	4.33237e-33	0.001
USA (Urban) vs. Mbalmayo (Semi-Urban)	Coyote (Urban) vs. Mayaguez (Urban)	-30.0531	3.14842e-182	5.77294e-178	0.001
USA (Urban) vs. all	Coyote (Urban) vs. Mayaguez (Urban)	-36.9582	8.08968e-190	1.48332e-185	0.001
USA (Urban) vs. all	Coyote (Urban) vs. Mayaguez (Urban)	-44.9818	0	0	0.001
USA (Urban) vs. Sparrow (Urban)	Coyote (Urban) vs. Mayaguez (Urban)	11.4053	0	0	0.001
USA (Urban) vs. Tibet (Rural)	Coyote (Urban) vs. Mayaguez (Urban)	-34.1998	1.22344e-200	2.24331e-196	0.001
USA (Urban) vs. Tibet (Urban)	Coyote (Urban) vs. Mayaguez (Urban)	-38.1254	2.45918e-237	4.50915e-233	0.001
USA (Urban) vs. USA (Urban)	Coyote (Urban) vs. Mayaguez (Urban)	-48.0016	0	0	0.001
USA (Urban) vs. Venezuela (Rural)	Coyote (Urban) vs. Mayaguez (Urban)	-26.2232	5.57906e-146	1.02298e-141	0.001
Venezuela (Rural) vs. Venezuela (Rural)	Coyote (Urban) vs. Mayaguez (Urban)	-40.8815	3.18243e-198	5.8353e-194	0.001
Yaounde (Urban) vs. Coyote (Rural)	Coyote (Urban) vs. Mayaguez (Urban)	-8.48875	4.67974e-17	8.58077e-13	0.001
Yaounde (Urban) vs. Coyote (Urban)	Coyote (Urban) vs. Mayaguez (Urban)	-8.40684	8.10625e-16	1.48636e-11	0.001
Yaounde (Urban) vs. Mayaguez (Urban)	Coyote (Urban) vs. Mayaguez (Urban)	-7.33262	1.32643e-12	2.43213e-08	0.001
Yaounde (Urban) vs. Mbalmayo (Semi-Urban)	Coyote (Urban) vs. Mayaguez (Urban)	-43.6572	7.23472e-203	1.32656e-198	0.001
Yaounde (Urban) vs. all	Coyote (Urban) vs. Mayaguez (Urban)	-40.8474	5.24156e-103	9.61093e-99	0.001
Yaounde (Urban) vs. all	Coyote (Urban) vs. Mayaguez (Urban)	-38.1584	8.9843e-182	1.64736e-177	0.001
Yaounde (Urban) vs. Sparrow (Urban)	Coyote (Urban) vs. Mayaguez (Urban)	9.65761	0	0	0.001
Yaounde (Urban) vs. Tibet (Rural)	Coyote (Urban) vs. Mayaguez (Urban)	-56.7951	2.06912e-172	3.79395e-168	0.001
Yaounde (Urban) vs. Tibet (Urban)	Coyote (Urban) vs. Mayaguez (Urban)	-51.6962	2.73942e-160	5.023e-156	0.001
Yaounde (Urban) vs. USA (Urban)	Coyote (Urban) vs. Mayaguez (Urban)	-32.4959	2.92849e-215	5.36968e-211	0.001
Yaounde (Urban) vs. Venezuela (Rural)	Coyote (Urban) vs. Mayaguez (Urban)	-35.8512	6.10554e-192	1.11951e-187	0.001
Yaounde (Urban) vs. Yaounde (Urban)	Coyote (Urban) vs. Mayaguez (Urban)	-43.0723	4.75691e-171	8.72227e-167	0.001
All between population	Coyote (Urban) vs. Mbalmayo (Semi-Urban)	-6.024	1.7043e-09	3.12501e-05	0.001
All within population	Coyote (Urban) vs. Mbalmayo (Semi-Urban)	-45.6736	0	0	0.001
Coyote (Rural) vs. Coyote (Rural)	Coyote (Urban) vs. Mbalmayo (Semi-Urban)	-32.8791	6.65204e-180	1.21972e-175	0.001
Coyote (Rural) vs. Coyote (Urban)	Coyote (Urban) vs. Mbalmayo (Semi-Urban)	-24.4265	1.03189e-96	1.89208e-92	0.001
Coyote (Rural) vs. Mayaguez (Urban)	Coyote (Urban) vs. Mbalmayo (Semi-Urban)	15.3504	0	0	0.001
Coyote (Rural) vs. Mbalmayo (Semi-Urban)	Coyote (Urban) vs. Mbalmayo (Semi-Urban)	13.8282	0	0	0.001
Coyote (Rural) vs. all	Coyote (Urban) vs. Mbalmayo (Semi-Urban)	12.5203	0	0	0.001
Coyote (Rural) vs. Sparrow (Urban)	Coyote (Urban) vs. Mbalmayo (Semi-Urban)	32.1645	0	0	0.001
Coyote (Rural) vs. Tibet (Rural)	Coyote (Urban) vs. Mbalmayo (Semi-Urban)	7.71331	4.86278e-14	8.91639e-10	0.001
Coyote (Rural) vs. Tibet (Urban)	Coyote (Urban) vs. Mbalmayo (Semi-Urban)	6.10793	1.77596e-09	3.2564e-05	0.001
Coyote (Rural) vs. Venezuela (Rural)	Coyote (Urban) vs. Mbalmayo (Semi-Urban)	17.5307	0	0	0.001
Coyote (Urban) vs. Coyote (Urban)	Coyote (Urban) vs. Mbalmayo (Semi-Urban)	-13.9525	3.36314e-33	6.16665e-29	0.001
Malawi (Rural) vs. Coyote (Rural)	Coyote (Urban) vs. Mbalmayo (Semi-Urban)	21.6591	0	0	0.001
Malawi (Rural) vs. Coyote (Urban)	Coyote (Urban) vs. Mbalmayo (Semi-Urban)	0.961113	0.336806	1	0.337
Malawi (Rural) vs. Malawi (Rural)	Coyote (Urban) vs. Mbalmayo (Semi-Urban)	-56.7527	0	0	0.001
Malawi (Rural) vs. Maricao (Rural)	Coyote (Urban) vs. Mbalmayo (Semi-Urban)	31.0515	0	0	0.001
Malawi (Rural) vs. Mayaguez (Urban)	Coyote (Urban) vs. Mbalmayo (Semi-Urban)	16.3779	0	0	0.001
Malawi (Rural) vs. Mbalmayo (Semi-Urban)	Coyote (Urban) vs. Mbalmayo (Semi-Urban)	-53.3239	0	0	0.001
Malawi (Rural) vs. all	Coyote (Urban) vs. Mbalmayo (Semi-Urban)	-27.4829	3.16607e-96	5.8053e-92	0.001
Malawi (Rural) vs. all	Coyote (Urban) vs. Mbalmayo (Semi-Urban)	-28.2404	3.96643e-141	7.27285e-137	0.001
Malawi (Rural) vs. Sparrow (Rural)	Coyote (Urban) vs. Mbalmayo (Semi-Urban)	27.6839	0	0	0.001
Malawi (Rural) vs. Sparrow (Urban)	Coyote (Urban) vs. Mbalmayo (Semi-Urban)	38.3618	0	0	0.001
Malawi (Rural) vs. Tibet (Rural)	Coyote (Urban) vs. Mbalmayo (Semi-Urban)	-44.3836	1.64858e-197	3.02284e-193	0.001
Malawi (Rural) vs. Tibet (Semi-Urban)	Coyote (Urban) vs. Mbalmayo (Semi-Urban)	-35.0528	4.7253e-151	8.6643e-147	0.001
Malawi (Rural) vs. Tibet (Urban)	Coyote (Urban) vs. Mbalmayo (Semi-Urban)	-31.7385	1.63231e-133	2.99301e-129	0.001
Malawi (Rural) vs. USA (Urban)	Coyote (Urban) vs. Mbalmayo (Semi-Urban)	-29.5275	2.64144e-185	4.84334e-181	0.001
Malawi (Rural) vs. Venezuela (Rural)	Coyote (Urban) vs. Mbalmayo (Semi-Urban)	-51.3577	0	0	0.001
Malawi (Rural) vs. Yaounde (Urban)	Coyote (Urban) vs. Mbalmayo (Semi-Urban)	-44.5564	1.31903e-291	2.41857e-287	0.001
Maricao (Rural) (non-cristatellus)noncristatellus vs. Coyote (Rural)	Coyote (Urban) vs. Mbalmayo (Semi-Urban)	30.5975	0	0	0.001
Maricao (Rural) (non-cristatellus)noncristatellus vs. Coyote (Urban)	Coyote (Urban) vs. Mbalmayo (Semi-Urban)	12.9422	0	0	0.001
Maricao (Rural) (non-cristatellus)noncristatellus vs. Malawi (Rural)	Coyote (Urban) vs. Mbalmayo (Semi-Urban)	30.6866	0	0	0.001
Maricao (Rural) (non-cristatellus)noncristatellus vs. Maricao (Rural)	Coyote (Urban) vs. Mbalmayo (Semi-Urban)	-31.8392	8.93042e-164	1.63748e-159	0.001
Maricao (Rural) (non-cristatellus)noncristatellus vs. Maricao (Rural) (non-cristatellus)noncristatellus	Coyote (Urban) vs. Mbalmayo (Semi-Urban)	-35.8575	2.84749e-158	5.22117e-154	0.001
Maricao (Rural) (non-cristatellus)noncristatellus vs. Mayaguez (Urban)	Coyote (Urban) vs. Mbalmayo (Semi-Urban)	-26.0819	2.15336e-96	3.94841e-92	0.001
Maricao (Rural) (non-cristatellus)noncristatellus vs. Mbalmayo (Semi-Urban)	Coyote (Urban) vs. Mbalmayo (Semi-Urban)	17.5536	0	0	0.001
Maricao (Rural) (non-cristatellus)noncristatellus vs. all	Coyote (Urban) vs. Mbalmayo (Semi-Urban)	7.75888	1.06581e-13	1.95428e-09	0.001
Maricao (Rural) (non-cristatellus)noncristatellus vs. all	Coyote (Urban) vs. Mbalmayo (Semi-Urban)	16.0494	0	0	0.001
Maricao (Rural) (non-cristatellus)noncristatellus vs. Sparrow (Rural)	Coyote (Urban) vs. Mbalmayo (Semi-Urban)	21.8833	0	0	0.001
Maricao (Rural) (non-cristatellus)noncristatellus vs. Sparrow (Urban)	Coyote (Urban) vs. Mbalmayo (Semi-Urban)	30.882	0	0	0.001
Maricao (Rural) (non-cristatellus)noncristatellus vs. Tibet (Rural)	Coyote (Urban) vs. Mbalmayo (Semi-Urban)	11.9754	0	0	0.001
Maricao (Rural) (non-cristatellus)noncristatellus vs. Tibet (Semi-Urban)	Coyote (Urban) vs. Mbalmayo (Semi-Urban)	11.0199	0	0	0.001
Maricao (Rural) (non-cristatellus)noncristatellus vs. Tibet (Urban)	Coyote (Urban) vs. Mbalmayo (Semi-Urban)	10.6458	0	0	0.001
Maricao (Rural) (non-cristatellus)noncristatellus vs. USA (Urban)	Coyote (Urban) vs. Mbalmayo (Semi-Urban)	39.1699	0	0	0.001
Maricao (Rural) (non-cristatellus)noncristatellus vs. Venezuela (Rural)	Coyote (Urban) vs. Mbalmayo (Semi-Urban)	25.1209	0	0	0.001
Maricao (Rural) (non-cristatellus)noncristatellus vs. Yaounde (Urban)	Coyote (Urban) vs. Mbalmayo (Semi-Urban)	17.7097	0	0	0.001
Maricao (Rural) vs. Coyote (Rural)	Coyote (Urban) vs. Mbalmayo (Semi-Urban)	30.8138	0	0	0.001
Maricao (Rural) vs. Coyote (Urban)	Coyote (Urban) vs. Mbalmayo (Semi-Urban)	13.1654	0	0	0.001
Maricao (Rural) vs. Maricao (Rural)	Coyote (Urban) vs. Mbalmayo (Semi-Urban)	-30.9107	5.38218e-137	9.86877e-133	0.001
Maricao (Rural) vs. Mayaguez (Urban)	Coyote (Urban) vs. Mbalmayo (Semi-Urban)	-32.1203	4.36543e-128	8.00445e-124	0.001
Maricao (Rural) vs. Mbalmayo (Semi-Urban)	Coyote (Urban) vs. Mbalmayo (Semi-Urban)	17.7075	0	0	0.001
Maricao (Rural) vs. all	Coyote (Urban) vs. Mbalmayo (Semi-Urban)	7.91456	3.44169e-14	6.31069e-10	0.001
Maricao (Rural) vs. all	Coyote (Urban) vs. Mbalmayo (Semi-Urban)	15.8424	0	0	0.001
Maricao (Rural) vs. Sparrow (Urban)	Coyote (Urban) vs. Mbalmayo (Semi-Urban)	32.3032	0	0	0.001
Maricao (Rural) vs. Tibet (Rural)	Coyote (Urban) vs. Mbalmayo (Semi-Urban)	12.3563	0	0	0.001
Maricao (Rural) vs. Tibet (Semi-Urban)	Coyote (Urban) vs. Mbalmayo (Semi-Urban)	11.2426	0	0	0.001
Maricao (Rural) vs. Tibet (Urban)	Coyote (Urban) vs. Mbalmayo (Semi-Urban)	10.8861	0	0	0.001
Maricao (Rural) vs. USA (Urban)	Coyote (Urban) vs. Mbalmayo (Semi-Urban)	36.7971	0	0	0.001
Maricao (Rural) vs. Venezuela (Rural)	Coyote (Urban) vs. Mbalmayo (Semi-Urban)	25.4258	0	0	0.001
Maricao (Rural) vs. Yaounde (Urban)	Coyote (Urban) vs. Mbalmayo (Semi-Urban)	17.4737	0	0	0.001
Mayaguez (Urban) vs. Mayaguez (Urban)	Coyote (Urban) vs. Mbalmayo (Semi-Urban)	-17.5472	1.22762e-45	2.25097e-41	0.001
Mbalmayo (Semi-Urban) vs. Mbalmayo (Semi-Urban)	Coyote (Urban) vs. Mbalmayo (Semi-Urban)	-40.9785	1.73967e-148	3.18986e-144	0.001
Ngoantet (Rural) vs. Coyote (Rural)	Coyote (Urban) vs. Mbalmayo (Semi-Urban)	19.3336	0	0	0.001
Ngoantet (Rural) vs. Coyote (Urban)	Coyote (Urban) vs. Mbalmayo (Semi-Urban)	0.3303	0.741243	1	0.756
Ngoantet (Rural) vs. Malawi (Rural)	Coyote (Urban) vs. Mbalmayo (Semi-Urban)	-55.8324	0	0	0.001
Ngoantet (Rural) vs. Maricao (Rural)	Coyote (Urban) vs. Mbalmayo (Semi-Urban)	32.9486	0	0	0.001
Ngoantet (Rural) vs. Maricao (Rural) (non-cristatellus)noncristatellus	Coyote (Urban) vs. Mbalmayo (Semi-Urban)	33.3057	0	0	0.001
Ngoantet (Rural) vs. Mayaguez (Urban)	Coyote (Urban) vs. Mbalmayo (Semi-Urban)	17.3548	0	0	0.001
Ngoantet (Rural) vs. Mbalmayo (Semi-Urban)	Coyote (Urban) vs. Mbalmayo (Semi-Urban)	-56.0649	0	0	0.001
Ngoantet (Rural) vs. all	Coyote (Urban) vs. Mbalmayo (Semi-Urban)	-32.9909	1.33783e-129	2.45305e-125	0.001
Ngoantet (Rural) vs. all	Coyote (Urban) vs. Mbalmayo (Semi-Urban)	-32.2813	1.10879e-185	2.03308e-181	0.001
Ngoantet (Rural) vs. Ngoantet (Rural)	Coyote (Urban) vs. Mbalmayo (Semi-Urban)	-55.411	0	0	0.001
Ngoantet (Rural) vs. Sparrow (Rural)	Coyote (Urban) vs. Mbalmayo (Semi-Urban)	31.748	0	0	0.001
Ngoantet (Rural) vs. Sparrow (Urban)	Coyote (Urban) vs. Mbalmayo (Semi-Urban)	43.339	0	0	0.001
Ngoantet (Rural) vs. Tibet (Rural)	Coyote (Urban) vs. Mbalmayo (Semi-Urban)	-52.0148	1.02647e-263	1.88213e-259	0.001
Ngoantet (Rural) vs. Tibet (Semi-Urban)	Coyote (Urban) vs. Mbalmayo (Semi-Urban)	-39.5084	4.69962e-193	8.61722e-189	0.001
Ngoantet (Rural) vs. Tibet (Urban)	Coyote (Urban) vs. Mbalmayo (Semi-Urban)	-37.983	6.7664e-184	1.24069e-179	0.001
Ngoantet (Rural) vs. USA (Urban)	Coyote (Urban) vs. Mbalmayo (Semi-Urban)	-32.1444	1.74654e-220	3.20245e-216	0.001
Ngoantet (Rural) vs. Venezuela (Rural)	Coyote (Urban) vs. Mbalmayo (Semi-Urban)	-47.8271	0	0	0.001
Ngoantet (Rural) vs. Yaounde (Urban)	Coyote (Urban) vs. Mbalmayo (Semi-Urban)	-47.4022	0	0	0.001
Sparrow (Rural) vs. Coyote (Rural)	Coyote (Urban) vs. Mbalmayo (Semi-Urban)	22.6004	0	0	0.001
Sparrow (Rural) vs. Coyote (Urban)	Coyote (Urban) vs. Mbalmayo (Semi-Urban)	10.7936	0	0	0.001
Sparrow (Rural) vs. Maricao (Rural)	Coyote (Urban) vs. Mbalmayo (Semi-Urban)	22.8434	0	0	0.001
Sparrow (Rural) vs. Mayaguez (Urban)	Coyote (Urban) vs. Mbalmayo (Semi-Urban)	12.1908	0	0	0.001
Sparrow (Rural) vs. Mbalmayo (Semi-Urban)	Coyote (Urban) vs. Mbalmayo (Semi-Urban)	16.8701	0	0	0.001
Sparrow (Rural) vs. all	Coyote (Urban) vs. Mbalmayo (Semi-Urban)	7.33913	2.02793e-12	3.71842e-08	0.001
Sparrow (Rural) vs. all	Coyote (Urban) vs. Mbalmayo (Semi-Urban)	19.6096	0	0	0.001
Sparrow (Rural) vs. Sparrow (Rural)	Coyote (Urban) vs. Mbalmayo (Semi-Urban)	-12.6502	1.07852e-31	1.97758e-27	0.001
Sparrow (Rural) vs. Sparrow (Urban)	Coyote (Urban) vs. Mbalmayo (Semi-Urban)	-13.5875	2.13245e-39	3.91005e-35	0.001
Sparrow (Rural) vs. Tibet (Rural)	Coyote (Urban) vs. Mbalmayo (Semi-Urban)	10.885	0	0	0.001
Sparrow (Rural) vs. Tibet (Semi-Urban)	Coyote (Urban) vs. Mbalmayo (Semi-Urban)	10.8173	0	0	0.001
Sparrow (Rural) vs. Tibet (Urban)	Coyote (Urban) vs. Mbalmayo (Semi-Urban)	9.82872	0	0	0.001
Sparrow (Rural) vs. USA (Urban)	Coyote (Urban) vs. Mbalmayo (Semi-Urban)	51.084	0	0	0.001
Sparrow (Rural) vs. Venezuela (Rural)	Coyote (Urban) vs. Mbalmayo (Semi-Urban)	22.132	0	0	0.001
Sparrow (Rural) vs. Yaounde (Urban)	Coyote (Urban) vs. Mbalmayo (Semi-Urban)	19.4792	0	0	0.001
Sparrow (Urban) vs. Sparrow (Urban)	Coyote (Urban) vs. Mbalmayo (Semi-Urban)	-11.8573	7.41765e-31	1.3601e-26	0.001
Tibet (Rural) vs. Tibet (Rural)	Coyote (Urban) vs. Mbalmayo (Semi-Urban)	-22.3837	2.74323e-60	5.02998e-56	0.001
Tibet (Semi-Urban) vs. Coyote (Rural)	Coyote (Urban) vs. Mbalmayo (Semi-Urban)	6.79481	2.53604e-11	4.65008e-07	0.001
Tibet (Semi-Urban) vs. Coyote (Urban)	Coyote (Urban) vs. Mbalmayo (Semi-Urban)	-0.41536	0.678187	1	0.691
Tibet (Semi-Urban) vs. Mayaguez (Urban)	Coyote (Urban) vs. Mbalmayo (Semi-Urban)	5.63301	4.21122e-08	0.00077217	0.001
Tibet (Semi-Urban) vs. Mbalmayo (Semi-Urban)	Coyote (Urban) vs. Mbalmayo (Semi-Urban)	-29.821	4.10831e-101	7.533e-97	0.001
Tibet (Semi-Urban) vs. all	Coyote (Urban) vs. Mbalmayo (Semi-Urban)	-15.8646	3.00589e-39	5.5116e-35	0.001
Tibet (Semi-Urban) vs. all	Coyote (Urban) vs. Mbalmayo (Semi-Urban)	-26.2717	4.07151e-89	7.46552e-85	0.001
Tibet (Semi-Urban) vs. Sparrow (Urban)	Coyote (Urban) vs. Mbalmayo (Semi-Urban)	15.2451	0	0	0.001
Tibet (Semi-Urban) vs. Tibet (Rural)	Coyote (Urban) vs. Mbalmayo (Semi-Urban)	-26.1573	3.18314e-76	5.83661e-72	0.001
Tibet (Semi-Urban) vs. Tibet (Semi-Urban)	Coyote (Urban) vs. Mbalmayo (Semi-Urban)	-17.1211	2.9157e-43	5.34623e-39	0.001
Tibet (Semi-Urban) vs. Tibet (Urban)	Coyote (Urban) vs. Mbalmayo (Semi-Urban)	-22.5563	3.11517e-64	5.71198e-60	0.001
Tibet (Semi-Urban) vs. USA (Urban)	Coyote (Urban) vs. Mbalmayo (Semi-Urban)	-38.785	9.1386e-247	1.67565e-242	0.001
Tibet (Semi-Urban) vs. Venezuela (Rural)	Coyote (Urban) vs. Mbalmayo (Semi-Urban)	-30.4745	4.17631e-117	7.65768e-113	0.001
Tibet (Semi-Urban) vs. Yaounde (Urban)	Coyote (Urban) vs. Mbalmayo (Semi-Urban)	-33.3299	1.92366e-122	3.52723e-118	0.001
Tibet (Urban) vs. Tibet (Urban)	Coyote (Urban) vs. Mbalmayo (Semi-Urban)	-15.2009	7.63635e-37	1.4002e-32	0.001
USA (Urban) vs. Coyote (Rural)	Coyote (Urban) vs. Mbalmayo (Semi-Urban)	10.1633	0	0	0.001
USA (Urban) vs. Coyote (Urban)	Coyote (Urban) vs. Mbalmayo (Semi-Urban)	-2.1397	0.032476	1	0.031
USA (Urban) vs. Mayaguez (Urban)	Coyote (Urban) vs. Mbalmayo (Semi-Urban)	19.1184	0	0	0.001
USA (Urban) vs. Mbalmayo (Semi-Urban)	Coyote (Urban) vs. Mbalmayo (Semi-Urban)	-31.5724	1.1974e-199	2.19555e-195	0.001
USA (Urban) vs. all	Coyote (Urban) vs. Mbalmayo (Semi-Urban)	-34.5726	8.05933e-179	1.47776e-174	0.001
USA (Urban) vs. all	Coyote (Urban) vs. Mbalmayo (Semi-Urban)	-51.3815	0	0	0.001
USA (Urban) vs. Sparrow (Urban)	Coyote (Urban) vs. Mbalmayo (Semi-Urban)	66.1606	0	0	0.001
USA (Urban) vs. Tibet (Rural)	Coyote (Urban) vs. Mbalmayo (Semi-Urban)	-34.4917	1.26711e-205	2.32337e-201	0.001
USA (Urban) vs. Tibet (Urban)	Coyote (Urban) vs. Mbalmayo (Semi-Urban)	-39.8856	1.90867e-257	3.49975e-253	0.001
USA (Urban) vs. USA (Urban)	Coyote (Urban) vs. Mbalmayo (Semi-Urban)	-58.5198	0	0	0.001
USA (Urban) vs. Venezuela (Rural)	Coyote (Urban) vs. Mbalmayo (Semi-Urban)	-26.794	3.8221e-152	7.0082e-148	0.001
Venezuela (Rural) vs. Venezuela (Rural)	Coyote (Urban) vs. Mbalmayo (Semi-Urban)	-45.4096	3.30553e-236	6.06102e-232	0.001
Yaounde (Urban) vs. Coyote (Rural)	Coyote (Urban) vs. Mbalmayo (Semi-Urban)	9.90043	0	0	0.001
Yaounde (Urban) vs. Coyote (Urban)	Coyote (Urban) vs. Mbalmayo (Semi-Urban)	-1.38764	0.165867	1	0.174
Yaounde (Urban) vs. Mayaguez (Urban)	Coyote (Urban) vs. Mbalmayo (Semi-Urban)	8.63749	0	0	0.001
Yaounde (Urban) vs. Mbalmayo (Semi-Urban)	Coyote (Urban) vs. Mbalmayo (Semi-Urban)	-45.0766	8.43693e-224	1.547e-219	0.001
Yaounde (Urban) vs. all	Coyote (Urban) vs. Mbalmayo (Semi-Urban)	-25.9857	3.10075e-81	5.68554e-77	0.001
Yaounde (Urban) vs. all	Coyote (Urban) vs. Mbalmayo (Semi-Urban)	-35.6107	2.86422e-174	5.25184e-170	0.001
Yaounde (Urban) vs. Sparrow (Urban)	Coyote (Urban) vs. Mbalmayo (Semi-Urban)	26.9595	0	0	0.001
Yaounde (Urban) vs. Tibet (Rural)	Coyote (Urban) vs. Mbalmayo (Semi-Urban)	-39.3355	3.77302e-146	6.91821e-142	0.001
Yaounde (Urban) vs. Tibet (Urban)	Coyote (Urban) vs. Mbalmayo (Semi-Urban)	-32.3517	2.14061e-118	3.92503e-114	0.001
Yaounde (Urban) vs. USA (Urban)	Coyote (Urban) vs. Mbalmayo (Semi-Urban)	-35.6001	9.33056e-255	1.71085e-250	0.001
Yaounde (Urban) vs. Venezuela (Rural)	Coyote (Urban) vs. Mbalmayo (Semi-Urban)	-39.1421	1.43014e-222	2.62231e-218	0.001
Yaounde (Urban) vs. Yaounde (Urban)	Coyote (Urban) vs. Mbalmayo (Semi-Urban)	-41.6159	7.19049e-181	1.31845e-176	0.001
All between population	Coyote (Urban) vs. all	-6.97322	3.10654e-12	5.69614e-08	0.001
All within population	Coyote (Urban) vs. all	-49.6421	0	0	0.001
Coyote (Rural) vs. Coyote (Rural)	Coyote (Urban) vs. all	-36.2775	1.30573e-209	2.39419e-205	0.001
Coyote (Rural) vs. Coyote (Urban)	Coyote (Urban) vs. all	-27.4809	6.69823e-116	1.22819e-111	0.001
Coyote (Rural) vs. Mayaguez (Urban)	Coyote (Urban) vs. all	19.882	0	0	0.001
Coyote (Rural) vs. Mbalmayo (Semi-Urban)	Coyote (Urban) vs. all	15.9307	0	0	0.001
Coyote (Rural) vs. all	Coyote (Urban) vs. all	13.8172	0	0	0.001
Coyote (Rural) vs. Sparrow (Urban)	Coyote (Urban) vs. all	40.1617	0	0	0.001
Coyote (Rural) vs. Tibet (Rural)	Coyote (Urban) vs. all	9.10707	0	0	0.001
Coyote (Rural) vs. Tibet (Urban)	Coyote (Urban) vs. all	6.84528	1.76013e-11	3.22737e-07	0.001
Coyote (Rural) vs. Venezuela (Rural)	Coyote (Urban) vs. all	19.7731	0	0	0.001
Coyote (Urban) vs. Coyote (Urban)	Coyote (Urban) vs. all	-17.7363	7.61334e-48	1.39598e-43	0.001
Coyote (Urban) vs. Mayaguez (Urban)	Coyote (Urban) vs. all	8.57376	4.44089e-16	8.14282e-12	0.001
Coyote (Urban) vs. Mbalmayo (Semi-Urban)	Coyote (Urban) vs. all	-0.667987	0.504486	1	0.502
Coyote (Urban) vs. Sparrow (Urban)	Coyote (Urban) vs. all	20.1025	0	0	0.001
Coyote (Urban) vs. Venezuela (Rural)	Coyote (Urban) vs. all	0.465419	0.641795	1	0.662
Malawi (Rural) vs. Coyote (Rural)	Coyote (Urban) vs. all	24.0553	0	0	0.001
Malawi (Rural) vs. Coyote (Urban)	Coyote (Urban) vs. all	0.350006	0.726429	1	0.709
Malawi (Rural) vs. Malawi (Rural)	Coyote (Urban) vs. all	-63.7936	0	0	0.001
Malawi (Rural) vs. Maricao (Rural)	Coyote (Urban) vs. all	40.3865	0	0	0.001
Malawi (Rural) vs. Mayaguez (Urban)	Coyote (Urban) vs. all	21.5046	0	0	0.001
Malawi (Rural) vs. Mbalmayo (Semi-Urban)	Coyote (Urban) vs. all	-61.4225	0	0	0.001
Malawi (Rural) vs. all	Coyote (Urban) vs. all	-34.8042	3.25805e-130	5.97396e-126	0.001
Malawi (Rural) vs. all	Coyote (Urban) vs. all	-32.7431	9.17488e-179	1.68231e-174	0.001
Malawi (Rural) vs. Sparrow (Rural)	Coyote (Urban) vs. all	36.5471	0	0	0.001
Malawi (Rural) vs. Sparrow (Urban)	Coyote (Urban) vs. all	50.0361	0	0	0.001
Malawi (Rural) vs. Tibet (Rural)	Coyote (Urban) vs. all	-57.0464	2.26169e-259	4.14703e-255	0.001
Malawi (Rural) vs. Tibet (Semi-Urban)	Coyote (Urban) vs. all	-43.4156	6.583e-197	1.20706e-192	0.001
Malawi (Rural) vs. Tibet (Urban)	Coyote (Urban) vs. all	-40.5657	1.3713e-182	2.51442e-178	0.001
Malawi (Rural) vs. USA (Urban)	Coyote (Urban) vs. all	-32.8286	7.7233e-227	1.41614e-222	0.001
Malawi (Rural) vs. Venezuela (Rural)	Coyote (Urban) vs. all	-57.2958	0	0	0.001
Malawi (Rural) vs. Yaounde (Urban)	Coyote (Urban) vs. all	-50.2242	0	0	0.001
Maricao (Rural) (non-cristatellus)noncristatellus vs. Coyote (Rural)	Coyote (Urban) vs. all	39.8644	0	0	0.001
Maricao (Rural) (non-cristatellus)noncristatellus vs. Coyote (Urban)	Coyote (Urban) vs. all	17.0976	0	0	0.001
Maricao (Rural) (non-cristatellus)noncristatellus vs. Malawi (Rural)	Coyote (Urban) vs. all	40.1447	0	0	0.001
Maricao (Rural) (non-cristatellus)noncristatellus vs. Maricao (Rural)	Coyote (Urban) vs. all	-36.2341	5.8591e-199	1.07432e-194	0.001
Maricao (Rural) (non-cristatellus)noncristatellus vs. Maricao (Rural) (non-cristatellus)noncristatellus	Coyote (Urban) vs. all	-41.9237	2.01884e-193	3.70174e-189	0.001
Maricao (Rural) (non-cristatellus)noncristatellus vs. Mayaguez (Urban)	Coyote (Urban) vs. all	-33.1102	7.38378e-133	1.35389e-128	0.001
Maricao (Rural) (non-cristatellus)noncristatellus vs. Mbalmayo (Semi-Urban)	Coyote (Urban) vs. all	22.9258	0	0	0.001
Maricao (Rural) (non-cristatellus)noncristatellus vs. all	Coyote (Urban) vs. all	10.2447	0	0	0.001
Maricao (Rural) (non-cristatellus)noncristatellus vs. all	Coyote (Urban) vs. all	20.5126	0	0	0.001
Maricao (Rural) (non-cristatellus)noncristatellus vs. Sparrow (Rural)	Coyote (Urban) vs. all	29.1435	0	0	0.001
Maricao (Rural) (non-cristatellus)noncristatellus vs. Sparrow (Urban)	Coyote (Urban) vs. all	40.9004	0	0	0.001
Maricao (Rural) (non-cristatellus)noncristatellus vs. Tibet (Rural)	Coyote (Urban) vs. all	15.8888	0	0	0.001
Maricao (Rural) (non-cristatellus)noncristatellus vs. Tibet (Semi-Urban)	Coyote (Urban) vs. all	14.4954	0	0	0.001
Maricao (Rural) (non-cristatellus)noncristatellus vs. Tibet (Urban)	Coyote (Urban) vs. all	13.9705	0	0	0.001
Maricao (Rural) (non-cristatellus)noncristatellus vs. USA (Urban)	Coyote (Urban) vs. all	44.7687	0	0	0.001
Maricao (Rural) (non-cristatellus)noncristatellus vs. Venezuela (Rural)	Coyote (Urban) vs. all	32.7136	0	0	0.001
Maricao (Rural) (non-cristatellus)noncristatellus vs. Yaounde (Urban)	Coyote (Urban) vs. all	22.4038	0	0	0.001
Maricao (Rural) vs. Coyote (Rural)	Coyote (Urban) vs. all	39.7815	0	0	0.001
Maricao (Rural) vs. Coyote (Urban)	Coyote (Urban) vs. all	17.3301	0	0	0.001
Maricao (Rural) vs. Maricao (Rural)	Coyote (Urban) vs. all	-35.7762	4.42267e-168	8.10941e-164	0.001
Maricao (Rural) vs. Mayaguez (Urban)	Coyote (Urban) vs. all	-40.1593	2.24683e-169	4.11979e-165	0.001
Maricao (Rural) vs. Mbalmayo (Semi-Urban)	Coyote (Urban) vs. all	22.9596	0	0	0.001
Maricao (Rural) vs. all	Coyote (Urban) vs. all	10.421	0	0	0.001
Maricao (Rural) vs. all	Coyote (Urban) vs. all	20.0652	0	0	0.001
Maricao (Rural) vs. Sparrow (Urban)	Coyote (Urban) vs. all	42.8011	0	0	0.001
Maricao (Rural) vs. Tibet (Rural)	Coyote (Urban) vs. all	16.3635	0	0	0.001
Maricao (Rural) vs. Tibet (Semi-Urban)	Coyote (Urban) vs. all	14.7532	0	0	0.001
Maricao (Rural) vs. Tibet (Urban)	Coyote (Urban) vs. all	14.2452	0	0	0.001
Maricao (Rural) vs. USA (Urban)	Coyote (Urban) vs. all	40.9982	0	0	0.001
Maricao (Rural) vs. Venezuela (Rural)	Coyote (Urban) vs. all	32.8842	0	0	0.001
Maricao (Rural) vs. Yaounde (Urban)	Coyote (Urban) vs. all	21.8712	0	0	0.001
Mayaguez (Urban) vs. Mayaguez (Urban)	Coyote (Urban) vs. all	-25.3401	9.22393e-75	1.6913e-70	0.001
Mbalmayo (Semi-Urban) vs. Mbalmayo (Semi-Urban)	Coyote (Urban) vs. all	-51.7733	3.47742e-191	6.37619e-187	0.001
Ngoantet (Rural) vs. Coyote (Rural)	Coyote (Urban) vs. all	20.2107	0	0	0.001
Ngoantet (Rural) vs. Coyote (Urban)	Coyote (Urban) vs. all	-0.429914	0.667349	1	0.65
Ngoantet (Rural) vs. Malawi (Rural)	Coyote (Urban) vs. all	-61.7001	0	0	0.001
Ngoantet (Rural) vs. Maricao (Rural)	Coyote (Urban) vs. all	41.5609	0	0	0.001
Ngoantet (Rural) vs. Maricao (Rural) (non-cristatellus)noncristatellus	Coyote (Urban) vs. all	42.5828	0	0	0.001
Ngoantet (Rural) vs. Mayaguez (Urban)	Coyote (Urban) vs. all	22.4158	0	0	0.001
Ngoantet (Rural) vs. Mbalmayo (Semi-Urban)	Coyote (Urban) vs. all	-63.1087	0	0	0.001
Ngoantet (Rural) vs. all	Coyote (Urban) vs. all	-40.81	1.55176e-168	2.84531e-164	0.001
Ngoantet (Rural) vs. all	Coyote (Urban) vs. all	-36.9099	1.59896e-230	2.93184e-226	0.001
Ngoantet (Rural) vs. Ngoantet (Rural)	Coyote (Urban) vs. all	-61.2655	0	0	0.001
Ngoantet (Rural) vs. Sparrow (Rural)	Coyote (Urban) vs. all	41.2458	0	0	0.001
Ngoantet (Rural) vs. Sparrow (Urban)	Coyote (Urban) vs. all	55.1806	0	0	0.001
Ngoantet (Rural) vs. Tibet (Rural)	Coyote (Urban) vs. all	-64.6212	0	0	0.001
Ngoantet (Rural) vs. Tibet (Semi-Urban)	Coyote (Urban) vs. all	-47.3127	7.97504e-242	1.4623e-237	0.001
Ngoantet (Rural) vs. Tibet (Urban)	Coyote (Urban) vs. all	-47.303	9.05377e-242	1.6601e-237	0.001
Ngoantet (Rural) vs. USA (Urban)	Coyote (Urban) vs. all	-35.6472	5.30385e-269	9.72514e-265	0.001
Ngoantet (Rural) vs. Venezuela (Rural)	Coyote (Urban) vs. all	-53.0097	0	0	0.001
Ngoantet (Rural) vs. Yaounde (Urban)	Coyote (Urban) vs. all	-52.7238	0	0	0.001
Sparrow (Rural) vs. Coyote (Rural)	Coyote (Urban) vs. all	28.6112	0	0	0.001
Sparrow (Rural) vs. Coyote (Urban)	Coyote (Urban) vs. all	14.2128	0	0	0.001
Sparrow (Rural) vs. Maricao (Rural)	Coyote (Urban) vs. all	30.3744	0	0	0.001
Sparrow (Rural) vs. Mayaguez (Urban)	Coyote (Urban) vs. all	16.271	0	0	0.001
Sparrow (Rural) vs. Mbalmayo (Semi-Urban)	Coyote (Urban) vs. all	22.3463	0	0	0.001
Sparrow (Rural) vs. all	Coyote (Urban) vs. all	9.771	0	0	0.001
Sparrow (Rural) vs. all	Coyote (Urban) vs. all	26.2051	0	0	0.001
Sparrow (Rural) vs. Sparrow (Rural)	Coyote (Urban) vs. all	-17.65	2.3793e-54	4.36268e-50	0.001
Sparrow (Rural) vs. Sparrow (Urban)	Coyote (Urban) vs. all	-18.3967	1.85329e-67	3.39819e-63	0.001
Sparrow (Rural) vs. Tibet (Rural)	Coyote (Urban) vs. all	14.5315	0	0	0.001
Sparrow (Rural) vs. Tibet (Semi-Urban)	Coyote (Urban) vs. all	14.4261	0	0	0.001
Sparrow (Rural) vs. Tibet (Urban)	Coyote (Urban) vs. all	12.9738	0	0	0.001
Sparrow (Rural) vs. USA (Urban)	Coyote (Urban) vs. all	63.8824	0	0	0.001
Sparrow (Rural) vs. Venezuela (Rural)	Coyote (Urban) vs. all	29.0091	0	0	0.001
Sparrow (Rural) vs. Yaounde (Urban)	Coyote (Urban) vs. all	25.6573	0	0	0.001
Sparrow (Urban) vs. Sparrow (Urban)	Coyote (Urban) vs. all	-16.3733	5.39072e-55	9.88442e-51	0.001
Tibet (Rural) vs. Tibet (Rural)	Coyote (Urban) vs. all	-29.5897	4.06146e-86	7.4471e-82	0.001
Tibet (Semi-Urban) vs. Coyote (Rural)	Coyote (Urban) vs. all	7.81967	2.13163e-14	3.90855e-10	0.001
Tibet (Semi-Urban) vs. Coyote (Urban)	Coyote (Urban) vs. all	-1.12464	0.26159	1	0.261
Tibet (Semi-Urban) vs. Mayaguez (Urban)	Coyote (Urban) vs. all	7.36734	1.5099e-12	2.76856e-08	0.001
Tibet (Semi-Urban) vs. Mbalmayo (Semi-Urban)	Coyote (Urban) vs. all	-38.6109	5.51936e-138	1.01203e-133	0.001
Tibet (Semi-Urban) vs. all	Coyote (Urban) vs. all	-22.4154	1.4126e-63	2.59014e-59	0.001
Tibet (Semi-Urban) vs. all	Coyote (Urban) vs. all	-34.9048	1.51528e-127	2.77842e-123	0.001
Tibet (Semi-Urban) vs. Sparrow (Urban)	Coyote (Urban) vs. all	20.2771	0	0	0.001
Tibet (Semi-Urban) vs. Tibet (Rural)	Coyote (Urban) vs. all	-35.7272	1.80407e-110	3.30795e-106	0.001
Tibet (Semi-Urban) vs. Tibet (Semi-Urban)	Coyote (Urban) vs. all	-24.2548	2.36999e-69	4.34561e-65	0.001
Tibet (Semi-Urban) vs. Tibet (Urban)	Coyote (Urban) vs. all	-31.4027	3.94652e-97	7.23634e-93	0.001
Tibet (Semi-Urban) vs. USA (Urban)	Coyote (Urban) vs. all	-44.0952	9.8826e-300	1.81207e-295	0.001
Tibet (Semi-Urban) vs. Venezuela (Rural)	Coyote (Urban) vs. all	-37.595	3.93294e-153	7.21144e-149	0.001
Tibet (Semi-Urban) vs. Yaounde (Urban)	Coyote (Urban) vs. all	-42.3768	1.20869e-162	2.21626e-158	0.001
Tibet (Urban) vs. Tibet (Urban)	Coyote (Urban) vs. all	-21.0807	1.12118e-58	2.05579e-54	0.001
USA (Urban) vs. Coyote (Rural)	Coyote (Urban) vs. all	9.06179	0	0	0.001
USA (Urban) vs. Coyote (Urban)	Coyote (Urban) vs. all	-3.53519	0.000414831	1	0.002
USA (Urban) vs. Mayaguez (Urban)	Coyote (Urban) vs. all	22.3167	0	0	0.001
USA (Urban) vs. Mbalmayo (Semi-Urban)	Coyote (Urban) vs. all	-35.1326	5.39004e-242	9.88317e-238	0.001
USA (Urban) vs. all	Coyote (Urban) vs. all	-40.5818	3.54543e-224	6.50091e-220	0.001
USA (Urban) vs. all	Coyote (Urban) vs. all	-56.7195	0	0	0.001
USA (Urban) vs. Sparrow (Urban)	Coyote (Urban) vs. all	79.227	0	0	0.001
USA (Urban) vs. Tibet (Rural)	Coyote (Urban) vs. all	-39.2224	7.31083e-252	1.34051e-247	0.001
USA (Urban) vs. Tibet (Urban)	Coyote (Urban) vs. all	-45.1638	2.850772553317e-310	5.22718e-306	0.001
USA (Urban) vs. USA (Urban)	Coyote (Urban) vs. all	-63.6412	0	0	0.001
USA (Urban) vs. Venezuela (Rural)	Coyote (Urban) vs. all	-29.7758	8.32165e-186	1.52586e-181	0.001
Venezuela (Rural) vs. Venezuela (Rural)	Coyote (Urban) vs. all	-51.526	3.51399e-276	6.44324e-272	0.001
Yaounde (Urban) vs. Coyote (Rural)	Coyote (Urban) vs. all	10.2294	0	0	0.001
Yaounde (Urban) vs. Coyote (Urban)	Coyote (Urban) vs. all	-2.40895	0.0163397	1	0.021
Yaounde (Urban) vs. Mayaguez (Urban)	Coyote (Urban) vs. all	10.9169	0	0	0.001
Yaounde (Urban) vs. Mbalmayo (Semi-Urban)	Coyote (Urban) vs. all	-52.3275	1.31797e-267	2.41664e-263	0.001
Yaounde (Urban) vs. all	Coyote (Urban) vs. all	-34.25	2.06487e-114	3.78615e-110	0.001
Yaounde (Urban) vs. all	Coyote (Urban) vs. all	-42.0927	6.01003e-218	1.102e-213	0.001
Yaounde (Urban) vs. Sparrow (Urban)	Coyote (Urban) vs. all	35.1728	0	0	0.001
Yaounde (Urban) vs. Tibet (Rural)	Coyote (Urban) vs. all	-51.0468	7.49971e-194	1.37515e-189	0.001
Yaounde (Urban) vs. Tibet (Urban)	Coyote (Urban) vs. all	-42.6677	9.39789e-164	1.7232e-159	0.001
Yaounde (Urban) vs. USA (Urban)	Coyote (Urban) vs. all	-39.3264	3.49072e-305	6.40059e-301	0.001
Yaounde (Urban) vs. Venezuela (Rural)	Coyote (Urban) vs. all	-44.1561	1.29463e-263	2.37383e-259	0.001
Yaounde (Urban) vs. Yaounde (Urban)	Coyote (Urban) vs. all	-49.4336	2.22608e-221	4.08174e-217	0.001
All between population	Coyote (Urban) vs. Sparrow (Urban)	-18.9658	3.80364e-80	6.97435e-76	0.001
All within population	Coyote (Urban) vs. Sparrow (Urban)	-82.7454	0	0	0.001
Coyote (Rural) vs. Coyote (Rural)	Coyote (Urban) vs. Sparrow (Urban)	-61.7372	0	0	0.001
Coyote (Rural) vs. Coyote (Urban)	Coyote (Urban) vs. Sparrow (Urban)	-49.2593	2.66702e-268	4.89025e-264	0.001
Coyote (Rural) vs. Mayaguez (Urban)	Coyote (Urban) vs. Sparrow (Urban)	-3.229	0.0012832	1	0.002
Coyote (Rural) vs. Mbalmayo (Semi-Urban)	Coyote (Urban) vs. Sparrow (Urban)	-16.743	5.38684e-58	9.8773e-54	0.001
Coyote (Rural) vs. all	Coyote (Urban) vs. Sparrow (Urban)	-17.2836	7.88761e-62	1.44627e-57	0.001
Coyote (Rural) vs. Sparrow (Urban)	Coyote (Urban) vs. Sparrow (Urban)	-1.79199	0.0732384	1	0.066
Coyote (Rural) vs. Tibet (Rural)	Coyote (Urban) vs. Sparrow (Urban)	-21.8021	1.14296e-84	2.09573e-80	0.001
Coyote (Rural) vs. Tibet (Urban)	Coyote (Urban) vs. Sparrow (Urban)	-23.2416	1.24713e-93	2.28673e-89	0.001
Coyote (Rural) vs. Venezuela (Rural)	Coyote (Urban) vs. Sparrow (Urban)	-20.4028	1.42887e-85	2.61997e-81	0.001
Coyote (Urban) vs. Coyote (Urban)	Coyote (Urban) vs. Sparrow (Urban)	-40.6719	1.23607e-162	2.26646e-158	0.001
Coyote (Urban) vs. Mbalmayo (Semi-Urban)	Coyote (Urban) vs. Sparrow (Urban)	-15.3439	7.86924e-46	1.4429e-41	0.001
Malawi (Rural) vs. Coyote (Rural)	Coyote (Urban) vs. Sparrow (Urban)	-14.9536	5.87413e-49	1.07708e-44	0.001
Malawi (Rural) vs. Coyote (Urban)	Coyote (Urban) vs. Sparrow (Urban)	-13.5651	1.26496e-38	2.31943e-34	0.001
Malawi (Rural) vs. Malawi (Rural)	Coyote (Urban) vs. Sparrow (Urban)	-109.717	0	0	0.001
Malawi (Rural) vs. Maricao (Rural)	Coyote (Urban) vs. Sparrow (Urban)	5.67737	1.53999e-08	0.000282372	0.001
Malawi (Rural) vs. Mayaguez (Urban)	Coyote (Urban) vs. Sparrow (Urban)	-0.869586	0.384734	1	0.4
Malawi (Rural) vs. Mbalmayo (Semi-Urban)	Coyote (Urban) vs. Sparrow (Urban)	-112.064	0	0	0.001
Malawi (Rural) vs. all	Coyote (Urban) vs. Sparrow (Urban)	-80.0176	0	0	0.001
Malawi (Rural) vs. all	Coyote (Urban) vs. Sparrow (Urban)	-67.5968	0	0	0.001
Malawi (Rural) vs. Sparrow (Rural)	Coyote (Urban) vs. Sparrow (Urban)	16.5897	0	0	0.001
Malawi (Rural) vs. Sparrow (Urban)	Coyote (Urban) vs. Sparrow (Urban)	16.1532	0	0	0.001
Malawi (Rural) vs. Tibet (Rural)	Coyote (Urban) vs. Sparrow (Urban)	-135.194	0	0	0.001
Malawi (Rural) vs. Tibet (Semi-Urban)	Coyote (Urban) vs. Sparrow (Urban)	-94.9015	0	0	0.001
Malawi (Rural) vs. Tibet (Urban)	Coyote (Urban) vs. Sparrow (Urban)	-98.908	0	0	0.001
Malawi (Rural) vs. USA (Urban)	Coyote (Urban) vs. Sparrow (Urban)	-64.8691	0	0	0.001
Malawi (Rural) vs. Venezuela (Rural)	Coyote (Urban) vs. Sparrow (Urban)	-99.258	0	0	0.001
Malawi (Rural) vs. Yaounde (Urban)	Coyote (Urban) vs. Sparrow (Urban)	-90.0186	0	0	0.001
Maricao (Rural) (non-cristatellus)noncristatellus vs. Coyote (Rural)	Coyote (Urban) vs. Sparrow (Urban)	13.0389	0	0	0.001
Maricao (Rural) (non-cristatellus)noncristatellus vs. Coyote (Urban)	Coyote (Urban) vs. Sparrow (Urban)	2.7455	0.00618126	1	0.003
Maricao (Rural) (non-cristatellus)noncristatellus vs. Malawi (Rural)	Coyote (Urban) vs. Sparrow (Urban)	10.5899	0	0	0.001
Maricao (Rural) (non-cristatellus)noncristatellus vs. Maricao (Rural)	Coyote (Urban) vs. Sparrow (Urban)	-68.1473	0	0	0.001
Maricao (Rural) (non-cristatellus)noncristatellus vs. Maricao (Rural) (non-cristatellus)noncristatellus	Coyote (Urban) vs. Sparrow (Urban)	-78.9501	0	0	0.001
Maricao (Rural) (non-cristatellus)noncristatellus vs. Mayaguez (Urban)	Coyote (Urban) vs. Sparrow (Urban)	-79.3942	0	0	0.001
Maricao (Rural) (non-cristatellus)noncristatellus vs. Mbalmayo (Semi-Urban)	Coyote (Urban) vs. Sparrow (Urban)	-2.94492	0.00329721	1	0.007
Maricao (Rural) (non-cristatellus)noncristatellus vs. all	Coyote (Urban) vs. Sparrow (Urban)	-1.67142	0.0951674	1	0.089
Maricao (Rural) (non-cristatellus)noncristatellus vs. all	Coyote (Urban) vs. Sparrow (Urban)	-15.6399	2.30585e-50	4.22801e-46	0.001
Maricao (Rural) (non-cristatellus)noncristatellus vs. Sparrow (Rural)	Coyote (Urban) vs. Sparrow (Urban)	19.93	0	0	0.001
Maricao (Rural) (non-cristatellus)noncristatellus vs. Sparrow (Urban)	Coyote (Urban) vs. Sparrow (Urban)	23.7481	0	0	0.001
Maricao (Rural) (non-cristatellus)noncristatellus vs. Tibet (Rural)	Coyote (Urban) vs. Sparrow (Urban)	5.36694	1.08277e-07	0.00198537	0.001
Maricao (Rural) (non-cristatellus)noncristatellus vs. Tibet (Semi-Urban)	Coyote (Urban) vs. Sparrow (Urban)	-1.36297	0.173322	1	0.175
Maricao (Rural) (non-cristatellus)noncristatellus vs. Tibet (Urban)	Coyote (Urban) vs. Sparrow (Urban)	-4.08644	4.87606e-05	0.894074	0.001
Maricao (Rural) (non-cristatellus)noncristatellus vs. USA (Urban)	Coyote (Urban) vs. Sparrow (Urban)	-20.8785	3.74174e-94	6.86086e-90	0.001
Maricao (Rural) (non-cristatellus)noncristatellus vs. Venezuela (Rural)	Coyote (Urban) vs. Sparrow (Urban)	5.80661	7.63519e-09	0.000139999	0.001
Maricao (Rural) (non-cristatellus)noncristatellus vs. Yaounde (Urban)	Coyote (Urban) vs. Sparrow (Urban)	-12.7508	2.8858e-35	5.2914e-31	0.001
Maricao (Rural) vs. Coyote (Rural)	Coyote (Urban) vs. Sparrow (Urban)	8.22342	4.44089e-16	8.14282e-12	0.001
Maricao (Rural) vs. Coyote (Urban)	Coyote (Urban) vs. Sparrow (Urban)	0.295056	0.768027	1	0.77
Maricao (Rural) vs. Maricao (Rural)	Coyote (Urban) vs. Sparrow (Urban)	-67.8244	0	0	0.001
Maricao (Rural) vs. Mayaguez (Urban)	Coyote (Urban) vs. Sparrow (Urban)	-89.7517	0	0	0.001
Maricao (Rural) vs. Mbalmayo (Semi-Urban)	Coyote (Urban) vs. Sparrow (Urban)	-5.9298	3.97674e-09	7.29175e-05	0.001
Maricao (Rural) vs. all	Coyote (Urban) vs. Sparrow (Urban)	-3.3089	0.000992342	1	0.001
Maricao (Rural) vs. all	Coyote (Urban) vs. Sparrow (Urban)	-19.8045	2.18847e-76	4.01277e-72	0.001
Maricao (Rural) vs. Sparrow (Urban)	Coyote (Urban) vs. Sparrow (Urban)	24.796	0	0	0.001
Maricao (Rural) vs. Tibet (Rural)	Coyote (Urban) vs. Sparrow (Urban)	4.23114	2.61702e-05	0.479857	0.001
Maricao (Rural) vs. Tibet (Semi-Urban)	Coyote (Urban) vs. Sparrow (Urban)	-3.46621	0.000558302	1	0.002
Maricao (Rural) vs. Tibet (Urban)	Coyote (Urban) vs. Sparrow (Urban)	-5.91504	5.06892e-09	9.29437e-05	0.001
Maricao (Rural) vs. USA (Urban)	Coyote (Urban) vs. Sparrow (Urban)	-23.5605	7.96485e-119	1.46043e-114	0.001
Maricao (Rural) vs. Venezuela (Rural)	Coyote (Urban) vs. Sparrow (Urban)	2.22024	0.0265298	1	0.026
Maricao (Rural) vs. Yaounde (Urban)	Coyote (Urban) vs. Sparrow (Urban)	-16.2961	5.7524e-55	1.05476e-50	0.001
Mayaguez (Urban) vs. Mayaguez (Urban)	Coyote (Urban) vs. Sparrow (Urban)	-134.027	0	0	0.001
Mbalmayo (Semi-Urban) vs. Mbalmayo (Semi-Urban)	Coyote (Urban) vs. Sparrow (Urban)	-112.397	0	0	0.001
Ngoantet (Rural) vs. Coyote (Rural)	Coyote (Urban) vs. Sparrow (Urban)	-17.7624	2.74695e-68	5.03681e-64	0.001
Ngoantet (Rural) vs. Coyote (Urban)	Coyote (Urban) vs. Sparrow (Urban)	-15.5121	9.27931e-50	1.70145e-45	0.001
Ngoantet (Rural) vs. Malawi (Rural)	Coyote (Urban) vs. Sparrow (Urban)	-106.187	0	0	0.001
Ngoantet (Rural) vs. Maricao (Rural)	Coyote (Urban) vs. Sparrow (Urban)	-7.18315	8.48106e-13	1.55509e-08	0.001
Ngoantet (Rural) vs. Maricao (Rural) (non-cristatellus)noncristatellus	Coyote (Urban) vs. Sparrow (Urban)	-1.79276	0.0731152	1	0.064
Ngoantet (Rural) vs. Mayaguez (Urban)	Coyote (Urban) vs. Sparrow (Urban)	-13.3965	2.45699e-38	4.50514e-34	0.001
Ngoantet (Rural) vs. Mbalmayo (Semi-Urban)	Coyote (Urban) vs. Sparrow (Urban)	-109.922	0	0	0.001
Ngoantet (Rural) vs. all	Coyote (Urban) vs. Sparrow (Urban)	-87.6035	0	0	0.001
Ngoantet (Rural) vs. all	Coyote (Urban) vs. Sparrow (Urban)	-73.4292	0	0	0.001
Ngoantet (Rural) vs. Ngoantet (Rural)	Coyote (Urban) vs. Sparrow (Urban)	-104.008	0	0	0.001
Ngoantet (Rural) vs. Sparrow (Rural)	Coyote (Urban) vs. Sparrow (Urban)	11.2128	0	0	0.001
Ngoantet (Rural) vs. Sparrow (Urban)	Coyote (Urban) vs. Sparrow (Urban)	9.50972	0	0	0.001
Ngoantet (Rural) vs. Tibet (Rural)	Coyote (Urban) vs. Sparrow (Urban)	-138.38	0	0	0.001
Ngoantet (Rural) vs. Tibet (Semi-Urban)	Coyote (Urban) vs. Sparrow (Urban)	-95.3697	0	0	0.001
Ngoantet (Rural) vs. Tibet (Urban)	Coyote (Urban) vs. Sparrow (Urban)	-106.686	0	0	0.001
Ngoantet (Rural) vs. USA (Urban)	Coyote (Urban) vs. Sparrow (Urban)	-69.6549	0	0	0.001
Ngoantet (Rural) vs. Venezuela (Rural)	Coyote (Urban) vs. Sparrow (Urban)	-92.1486	0	0	0.001
Ngoantet (Rural) vs. Yaounde (Urban)	Coyote (Urban) vs. Sparrow (Urban)	-91.6571	0	0	0.001
Sparrow (Rural) vs. Coyote (Rural)	Coyote (Urban) vs. Sparrow (Urban)	-3.2873	0.00103262	1	0.001
Sparrow (Rural) vs. Coyote (Urban)	Coyote (Urban) vs. Sparrow (Urban)	-0.0129678	0.989657	1	0.988
Sparrow (Rural) vs. Maricao (Rural)	Coyote (Urban) vs. Sparrow (Urban)	19.824	0	0	0.001
Sparrow (Rural) vs. Mayaguez (Urban)	Coyote (Urban) vs. Sparrow (Urban)	10.4922	0	0	0.001
Sparrow (Rural) vs. Mbalmayo (Semi-Urban)	Coyote (Urban) vs. Sparrow (Urban)	8.33968	2.22045e-16	4.07141e-12	0.001
Sparrow (Rural) vs. all	Coyote (Urban) vs. Sparrow (Urban)	3.83038	0.000142411	1	0.001
Sparrow (Rural) vs. all	Coyote (Urban) vs. Sparrow (Urban)	21.0989	0	0	0.001
Sparrow (Rural) vs. Sparrow (Rural)	Coyote (Urban) vs. Sparrow (Urban)	-67.2489	7.40589328264e-313	0	0.001
Sparrow (Rural) vs. Sparrow (Urban)	Coyote (Urban) vs. Sparrow (Urban)	-69.3353	0	0	0.001
Sparrow (Rural) vs. Tibet (Rural)	Coyote (Urban) vs. Sparrow (Urban)	9.32953	0	0	0.001
Sparrow (Rural) vs. Tibet (Semi-Urban)	Coyote (Urban) vs. Sparrow (Urban)	8.66094	0	0	0.001
Sparrow (Rural) vs. Tibet (Urban)	Coyote (Urban) vs. Sparrow (Urban)	1.14756	0.251573	1	0.243
Sparrow (Rural) vs. USA (Urban)	Coyote (Urban) vs. Sparrow (Urban)	12.3298	0	0	0.001
Sparrow (Rural) vs. Venezuela (Rural)	Coyote (Urban) vs. Sparrow (Urban)	7.41048	2.21823e-13	4.06734e-09	0.001
Sparrow (Rural) vs. Yaounde (Urban)	Coyote (Urban) vs. Sparrow (Urban)	7.30133	5.34905e-13	9.80803e-09	0.001
Sparrow (Urban) vs. Sparrow (Urban)	Coyote (Urban) vs. Sparrow (Urban)	-67.3859	0	0	0.001
Tibet (Rural) vs. Tibet (Rural)	Coyote (Urban) vs. Sparrow (Urban)	-73.1373	7.73982e-268	1.41917e-263	0.001
Tibet (Semi-Urban) vs. Coyote (Rural)	Coyote (Urban) vs. Sparrow (Urban)	-23.3674	2.01978e-94	3.70347e-90	0.001
Tibet (Semi-Urban) vs. Coyote (Urban)	Coyote (Urban) vs. Sparrow (Urban)	-19.41	2.89416e-64	5.30673e-60	0.001
Tibet (Semi-Urban) vs. Mayaguez (Urban)	Coyote (Urban) vs. Sparrow (Urban)	-5.85399	8.27152e-09	0.000151667	0.001
Tibet (Semi-Urban) vs. Mbalmayo (Semi-Urban)	Coyote (Urban) vs. Sparrow (Urban)	-93.008	0	0	0.001
Tibet (Semi-Urban) vs. all	Coyote (Urban) vs. Sparrow (Urban)	-88.0218	1.67191e-306	3.06562e-302	0.001
Tibet (Semi-Urban) vs. all	Coyote (Urban) vs. Sparrow (Urban)	-95.103	0	0	0.001
Tibet (Semi-Urban) vs. Sparrow (Urban)	Coyote (Urban) vs. Sparrow (Urban)	10.2666	0	0	0.001
Tibet (Semi-Urban) vs. Tibet (Rural)	Coyote (Urban) vs. Sparrow (Urban)	-106.592	0	0	0.001
Tibet (Semi-Urban) vs. Tibet (Semi-Urban)	Coyote (Urban) vs. Sparrow (Urban)	-98.3152	0	0	0.001
Tibet (Semi-Urban) vs. Tibet (Urban)	Coyote (Urban) vs. Sparrow (Urban)	-107.88	0	0	0.001
Tibet (Semi-Urban) vs. USA (Urban)	Coyote (Urban) vs. Sparrow (Urban)	-83.5845	0	0	0.001
Tibet (Semi-Urban) vs. Venezuela (Rural)	Coyote (Urban) vs. Sparrow (Urban)	-80.8496	0	0	0.001
Tibet (Semi-Urban) vs. Yaounde (Urban)	Coyote (Urban) vs. Sparrow (Urban)	-96.629	0	0	0.001
Tibet (Urban) vs. Tibet (Urban)	Coyote (Urban) vs. Sparrow (Urban)	-70.1977	8.88179e-260	1.62857e-255	0.001
USA (Urban) vs. Coyote (Rural)	Coyote (Urban) vs. Sparrow (Urban)	-23.5885	2.29806e-120	4.21373e-116	0.001
USA (Urban) vs. Coyote (Urban)	Coyote (Urban) vs. Sparrow (Urban)	-26.2367	1.37784e-135	2.52641e-131	0.001
USA (Urban) vs. Mayaguez (Urban)	Coyote (Urban) vs. Sparrow (Urban)	-35.1167	1.69548e-223	3.10884e-219	0.001
USA (Urban) vs. Mbalmayo (Semi-Urban)	Coyote (Urban) vs. Sparrow (Urban)	-66.6675	0	0	0.001
USA (Urban) vs. all	Coyote (Urban) vs. Sparrow (Urban)	-81.5291	0	0	0.001
USA (Urban) vs. all	Coyote (Urban) vs. Sparrow (Urban)	-99.167	0	0	0.001
USA (Urban) vs. Sparrow (Urban)	Coyote (Urban) vs. Sparrow (Urban)	9.79896	0	0	0.001
USA (Urban) vs. Tibet (Rural)	Coyote (Urban) vs. Sparrow (Urban)	-75.6812	0	0	0.001
USA (Urban) vs. Tibet (Urban)	Coyote (Urban) vs. Sparrow (Urban)	-84.161	0	0	0.001
USA (Urban) vs. USA (Urban)	Coyote (Urban) vs. Sparrow (Urban)	-105.567	0	0	0.001
USA (Urban) vs. Venezuela (Rural)	Coyote (Urban) vs. Sparrow (Urban)	-58.3514	0	0	0.001
Venezuela (Rural) vs. Venezuela (Rural)	Coyote (Urban) vs. Sparrow (Urban)	-89.6159	0	0	0.001
Yaounde (Urban) vs. Coyote (Rural)	Coyote (Urban) vs. Sparrow (Urban)	-21.8686	4.0576e-95	7.44002e-91	0.001
Yaounde (Urban) vs. Coyote (Urban)	Coyote (Urban) vs. Sparrow (Urban)	-19.5041	5.70528e-69	1.04612e-64	0.001
Yaounde (Urban) vs. Mayaguez (Urban)	Coyote (Urban) vs. Sparrow (Urban)	-18.869	2.12664e-65	3.89941e-61	0.001
Yaounde (Urban) vs. Mbalmayo (Semi-Urban)	Coyote (Urban) vs. Sparrow (Urban)	-95.6735	0	0	0.001
Yaounde (Urban) vs. all	Coyote (Urban) vs. Sparrow (Urban)	-87.8173	0	0	0.001
Yaounde (Urban) vs. all	Coyote (Urban) vs. Sparrow (Urban)	-83.9691	0	0	0.001
Yaounde (Urban) vs. Sparrow (Urban)	Coyote (Urban) vs. Sparrow (Urban)	5.69363	1.44559e-08	0.000265064	0.001
Yaounde (Urban) vs. Tibet (Rural)	Coyote (Urban) vs. Sparrow (Urban)	-122.392	0	0	0.001
Yaounde (Urban) vs. Tibet (Urban)	Coyote (Urban) vs. Sparrow (Urban)	-111.271	0	0	0.001
Yaounde (Urban) vs. USA (Urban)	Coyote (Urban) vs. Sparrow (Urban)	-71.9349	0	0	0.001
Yaounde (Urban) vs. Venezuela (Rural)	Coyote (Urban) vs. Sparrow (Urban)	-78.8859	0	0	0.001
Yaounde (Urban) vs. Yaounde (Urban)	Coyote (Urban) vs. Sparrow (Urban)	-94.2231	0	0	0.001
All between population	Coyote (Urban) vs. Tibet (Rural)	-3.67339	0.000239414	1	0.001
All within population	Coyote (Urban) vs. Tibet (Rural)	-28.1755	8.96721e-173	1.64423e-168	0.001
Coyote (Rural) vs. Coyote (Rural)	Coyote (Urban) vs. Tibet (Rural)	-20.7821	7.44174e-84	1.36452e-79	0.001
Coyote (Rural) vs. Coyote (Urban)	Coyote (Urban) vs. Tibet (Rural)	-15.8624	1.48635e-47	2.72537e-43	0.001
Coyote (Rural) vs. Mayaguez (Urban)	Coyote (Urban) vs. Tibet (Rural)	17.1302	0	0	0.001
Coyote (Rural) vs. Mbalmayo (Semi-Urban)	Coyote (Urban) vs. Tibet (Rural)	12.4625	0	0	0.001
Coyote (Rural) vs. all	Coyote (Urban) vs. Tibet (Rural)	10.5415	0	0	0.001
Coyote (Rural) vs. Sparrow (Urban)	Coyote (Urban) vs. Tibet (Rural)	32.2043	0	0	0.001
Coyote (Rural) vs. Tibet (Rural)	Coyote (Urban) vs. Tibet (Rural)	7.92109	1.57652e-14	2.8907e-10	0.001
Coyote (Rural) vs. Tibet (Urban)	Coyote (Urban) vs. Tibet (Rural)	6.0275	3.26057e-09	5.97859e-05	0.001
Coyote (Rural) vs. Venezuela (Rural)	Coyote (Urban) vs. Tibet (Rural)	15.1311	0	0	0.001
Coyote (Urban) vs. Coyote (Urban)	Coyote (Urban) vs. Tibet (Rural)	-11.3339	7.9307e-21	1.45417e-16	0.001
Coyote (Urban) vs. Mayaguez (Urban)	Coyote (Urban) vs. Tibet (Rural)	7.68691	9.79883e-13	1.79671e-08	0.001
Coyote (Urban) vs. Mbalmayo (Semi-Urban)	Coyote (Urban) vs. Tibet (Rural)	0.062585	0.95014	1	0.946
Coyote (Urban) vs. all	Coyote (Urban) vs. Tibet (Rural)	0.64621	0.518609	1	0.502
Coyote (Urban) vs. Sparrow (Urban)	Coyote (Urban) vs. Tibet (Rural)	17.5529	0	0	0.001
Coyote (Urban) vs. Tibet (Urban)	Coyote (Urban) vs. Tibet (Rural)	-0.510631	0.610322	1	0.596
Coyote (Urban) vs. Venezuela (Rural)	Coyote (Urban) vs. Tibet (Rural)	0.848572	0.396563	1	0.42
Malawi (Rural) vs. Coyote (Rural)	Coyote (Urban) vs. Tibet (Rural)	17.5546	0	0	0.001
Malawi (Rural) vs. Coyote (Urban)	Coyote (Urban) vs. Tibet (Rural)	0.728532	0.466564	1	0.457
Malawi (Rural) vs. Malawi (Rural)	Coyote (Urban) vs. Tibet (Rural)	-37.1263	7.00155e-215	1.2838e-210	0.001
Malawi (Rural) vs. Maricao (Rural)	Coyote (Urban) vs. Tibet (Rural)	34.4347	0	0	0.001
Malawi (Rural) vs. Mayaguez (Urban)	Coyote (Urban) vs. Tibet (Rural)	18.9091	0	0	0.001
Malawi (Rural) vs. Mbalmayo (Semi-Urban)	Coyote (Urban) vs. Tibet (Rural)	-36.2194	2.84567e-195	5.21782e-191	0.001
Malawi (Rural) vs. all	Coyote (Urban) vs. Tibet (Rural)	-22.1345	1.43326e-64	2.62802e-60	0.001
Malawi (Rural) vs. all	Coyote (Urban) vs. Tibet (Rural)	-18.8729	7.98195e-71	1.46357e-66	0.001
Malawi (Rural) vs. Sparrow (Rural)	Coyote (Urban) vs. Tibet (Rural)	31.6156	0	0	0.001
Malawi (Rural) vs. Sparrow (Urban)	Coyote (Urban) vs. Tibet (Rural)	42.3915	0	0	0.001
Malawi (Rural) vs. Tibet (Rural)	Coyote (Urban) vs. Tibet (Rural)	-37.0706	7.71331e-147	1.41431e-142	0.001
Malawi (Rural) vs. Tibet (Semi-Urban)	Coyote (Urban) vs. Tibet (Rural)	-26.9637	3.4309e-100	6.2909e-96	0.001
Malawi (Rural) vs. Tibet (Urban)	Coyote (Urban) vs. Tibet (Rural)	-25.7836	1.82458e-94	3.34555e-90	0.001
Malawi (Rural) vs. USA (Urban)	Coyote (Urban) vs. Tibet (Rural)	-18.3183	5.58472e-74	1.02401e-69	0.001
Malawi (Rural) vs. Venezuela (Rural)	Coyote (Urban) vs. Tibet (Rural)	-33.0485	1.03298e-193	1.89408e-189	0.001
Malawi (Rural) vs. Yaounde (Urban)	Coyote (Urban) vs. Tibet (Rural)	-29.0553	3.8043e-150	6.97557e-146	0.001
Maricao (Rural) (non-cristatellus)noncristatellus vs. Coyote (Rural)	Coyote (Urban) vs. Tibet (Rural)	33.6754	0	0	0.001
Maricao (Rural) (non-cristatellus)noncristatellus vs. Coyote (Urban)	Coyote (Urban) vs. Tibet (Rural)	15.0718	0	0	0.001
Maricao (Rural) (non-cristatellus)noncristatellus vs. Malawi (Rural)	Coyote (Urban) vs. Tibet (Rural)	34.3868	0	0	0.001
Maricao (Rural) (non-cristatellus)noncristatellus vs. Maricao (Rural)	Coyote (Urban) vs. Tibet (Rural)	-20.9403	1.48358e-82	2.7203e-78	0.001
Maricao (Rural) (non-cristatellus)noncristatellus vs. Maricao (Rural) (non-cristatellus)noncristatellus	Coyote (Urban) vs. Tibet (Rural)	-24.9629	3.50108e-92	6.41958e-88	0.001
Maricao (Rural) (non-cristatellus)noncristatellus vs. Mayaguez (Urban)	Coyote (Urban) vs. Tibet (Rural)	-20.871	2.1337e-65	3.91234e-61	0.001
Maricao (Rural) (non-cristatellus)noncristatellus vs. Mbalmayo (Semi-Urban)	Coyote (Urban) vs. Tibet (Rural)	20.0371	0	0	0.001
Maricao (Rural) (non-cristatellus)noncristatellus vs. all	Coyote (Urban) vs. Tibet (Rural)	9.14706	0	0	0.001
Maricao (Rural) (non-cristatellus)noncristatellus vs. all	Coyote (Urban) vs. Tibet (Rural)	17.8791	0	0	0.001
Maricao (Rural) (non-cristatellus)noncristatellus vs. Sparrow (Rural)	Coyote (Urban) vs. Tibet (Rural)	25.4825	0	0	0.001
Maricao (Rural) (non-cristatellus)noncristatellus vs. Sparrow (Urban)	Coyote (Urban) vs. Tibet (Rural)	35.3965	0	0	0.001
Maricao (Rural) (non-cristatellus)noncristatellus vs. Tibet (Rural)	Coyote (Urban) vs. Tibet (Rural)	14.021	0	0	0.001
Maricao (Rural) (non-cristatellus)noncristatellus vs. Tibet (Semi-Urban)	Coyote (Urban) vs. Tibet (Rural)	12.8186	0	0	0.001
Maricao (Rural) (non-cristatellus)noncristatellus vs. Tibet (Urban)	Coyote (Urban) vs. Tibet (Rural)	12.4131	0	0	0.001
Maricao (Rural) (non-cristatellus)noncristatellus vs. USA (Urban)	Coyote (Urban) vs. Tibet (Rural)	33.1689	0	0	0.001
Maricao (Rural) (non-cristatellus)noncristatellus vs. Venezuela (Rural)	Coyote (Urban) vs. Tibet (Rural)	27.8958	0	0	0.001
Maricao (Rural) (non-cristatellus)noncristatellus vs. Yaounde (Urban)	Coyote (Urban) vs. Tibet (Rural)	19.024	0	0	0.001
Maricao (Rural) vs. Coyote (Rural)	Coyote (Urban) vs. Tibet (Rural)	33.2401	0	0	0.001
Maricao (Rural) vs. Coyote (Urban)	Coyote (Urban) vs. Tibet (Rural)	15.2688	0	0	0.001
Maricao (Rural) vs. Maricao (Rural)	Coyote (Urban) vs. Tibet (Rural)	-21.0194	5.83538e-75	1.06997e-70	0.001
Maricao (Rural) vs. Mayaguez (Urban)	Coyote (Urban) vs. Tibet (Rural)	-25.1749	8.7929e-86	1.61227e-81	0.001
Maricao (Rural) vs. Mbalmayo (Semi-Urban)	Coyote (Urban) vs. Tibet (Rural)	19.9359	0	0	0.001
Maricao (Rural) vs. all	Coyote (Urban) vs. Tibet (Rural)	9.31614	0	0	0.001
Maricao (Rural) vs. all	Coyote (Urban) vs. Tibet (Rural)	17.472	0	0	0.001
Maricao (Rural) vs. Sparrow (Urban)	Coyote (Urban) vs. Tibet (Rural)	37.0931	0	0	0.001
Maricao (Rural) vs. Tibet (Rural)	Coyote (Urban) vs. Tibet (Rural)	14.4335	0	0	0.001
Maricao (Rural) vs. Tibet (Semi-Urban)	Coyote (Urban) vs. Tibet (Rural)	13.0748	0	0	0.001
Maricao (Rural) vs. Tibet (Urban)	Coyote (Urban) vs. Tibet (Rural)	12.6634	0	0	0.001
Maricao (Rural) vs. USA (Urban)	Coyote (Urban) vs. Tibet (Rural)	29.8901	0	0	0.001
Maricao (Rural) vs. Venezuela (Rural)	Coyote (Urban) vs. Tibet (Rural)	27.8498	0	0	0.001
Maricao (Rural) vs. Yaounde (Urban)	Coyote (Urban) vs. Tibet (Rural)	18.4868	0	0	0.001
Mayaguez (Urban) vs. Mayaguez (Urban)	Coyote (Urban) vs. Tibet (Rural)	-19.6682	8.65222e-40	1.58647e-35	0.001
Mbalmayo (Semi-Urban) vs. Mbalmayo (Semi-Urban)	Coyote (Urban) vs. Tibet (Rural)	-33.3667	5.9125e-101	1.08412e-96	0.001
Ngoantet (Rural) vs. Coyote (Rural)	Coyote (Urban) vs. Tibet (Rural)	14.3312	0	0	0.001
Ngoantet (Rural) vs. Coyote (Urban)	Coyote (Urban) vs. Tibet (Rural)	0.293305	0.76936	1	0.755
Ngoantet (Rural) vs. Malawi (Rural)	Coyote (Urban) vs. Tibet (Rural)	-35.3181	4.40081e-240	8.06933e-236	0.001
Ngoantet (Rural) vs. Maricao (Rural)	Coyote (Urban) vs. Tibet (Rural)	34.2144	0	0	0.001
Ngoantet (Rural) vs. Maricao (Rural) (non-cristatellus)noncristatellus	Coyote (Urban) vs. Tibet (Rural)	35.5514	0	0	0.001
Ngoantet (Rural) vs. Mayaguez (Urban)	Coyote (Urban) vs. Tibet (Rural)	19.6867	0	0	0.001
Ngoantet (Rural) vs. Mbalmayo (Semi-Urban)	Coyote (Urban) vs. Tibet (Rural)	-36.6825	5.41869e-218	9.93571e-214	0.001
Ngoantet (Rural) vs. all	Coyote (Urban) vs. Tibet (Rural)	-25.4193	9.09374e-85	1.66743e-80	0.001
Ngoantet (Rural) vs. all	Coyote (Urban) vs. Tibet (Rural)	-21.1495	1.49389e-89	2.73919e-85	0.001
Ngoantet (Rural) vs. Ngoantet (Rural)	Coyote (Urban) vs. Tibet (Rural)	-35.1842	2.89173e-228	5.30227e-224	0.001
Ngoantet (Rural) vs. Sparrow (Rural)	Coyote (Urban) vs. Tibet (Rural)	34.761	0	0	0.001
Ngoantet (Rural) vs. Sparrow (Urban)	Coyote (Urban) vs. Tibet (Rural)	44.9892	0	0	0.001
Ngoantet (Rural) vs. Tibet (Rural)	Coyote (Urban) vs. Tibet (Rural)	-40.5943	2.40633e-186	4.41224e-182	0.001
Ngoantet (Rural) vs. Tibet (Semi-Urban)	Coyote (Urban) vs. Tibet (Rural)	-28.5697	1.06664e-119	1.95579e-115	0.001
Ngoantet (Rural) vs. Tibet (Urban)	Coyote (Urban) vs. Tibet (Rural)	-29.3776	2.47251e-124	4.53359e-120	0.001
Ngoantet (Rural) vs. USA (Urban)	Coyote (Urban) vs. Tibet (Rural)	-19.8978	3.73829e-87	6.85454e-83	0.001
Ngoantet (Rural) vs. Venezuela (Rural)	Coyote (Urban) vs. Tibet (Rural)	-30.3642	4.00542e-177	7.34433e-173	0.001
Ngoantet (Rural) vs. Yaounde (Urban)	Coyote (Urban) vs. Tibet (Rural)	-30.3009	1.98958e-170	3.64809e-166	0.001
Sparrow (Rural) vs. Coyote (Rural)	Coyote (Urban) vs. Tibet (Rural)	23.5953	0	0	0.001
Sparrow (Rural) vs. Coyote (Urban)	Coyote (Urban) vs. Tibet (Rural)	12.5366	0	0	0.001
Sparrow (Rural) vs. Maricao (Rural)	Coyote (Urban) vs. Tibet (Rural)	26.4767	0	0	0.001
Sparrow (Rural) vs. Mayaguez (Urban)	Coyote (Urban) vs. Tibet (Rural)	14.359	0	0	0.001
Sparrow (Rural) vs. Mbalmayo (Semi-Urban)	Coyote (Urban) vs. Tibet (Rural)	19.6044	0	0	0.001
Sparrow (Rural) vs. all	Coyote (Urban) vs. Tibet (Rural)	8.66276	3.33067e-15	6.10711e-11	0.001
Sparrow (Rural) vs. all	Coyote (Urban) vs. Tibet (Rural)	23.0024	0	0	0.001
Sparrow (Rural) vs. Sparrow (Rural)	Coyote (Urban) vs. Tibet (Rural)	-11.62	2.07752e-26	3.80933e-22	0.001
Sparrow (Rural) vs. Sparrow (Urban)	Coyote (Urban) vs. Tibet (Rural)	-10.7285	1.14588e-25	2.10108e-21	0.001
Sparrow (Rural) vs. Tibet (Rural)	Coyote (Urban) vs. Tibet (Rural)	12.8309	0	0	0.001
Sparrow (Rural) vs. Tibet (Semi-Urban)	Coyote (Urban) vs. Tibet (Rural)	12.7248	0	0	0.001
Sparrow (Rural) vs. Tibet (Urban)	Coyote (Urban) vs. Tibet (Rural)	11.4485	0	0	0.001
Sparrow (Rural) vs. USA (Urban)	Coyote (Urban) vs. Tibet (Rural)	50.3653	0	0	0.001
Sparrow (Rural) vs. Venezuela (Rural)	Coyote (Urban) vs. Tibet (Rural)	24.9709	0	0	0.001
Sparrow (Rural) vs. Yaounde (Urban)	Coyote (Urban) vs. Tibet (Rural)	22.305	0	0	0.001
Sparrow (Urban) vs. Sparrow (Urban)	Coyote (Urban) vs. Tibet (Rural)	-9.44201	1.93897e-20	3.5553e-16	0.001
Tibet (Rural) vs. Tibet (Rural)	Coyote (Urban) vs. Tibet (Rural)	-20.2469	3.24094e-38	5.94258e-34	0.001
Tibet (Semi-Urban) vs. Coyote (Rural)	Coyote (Urban) vs. Tibet (Rural)	6.86959	1.94436e-11	3.56517e-07	0.001
Tibet (Semi-Urban) vs. Coyote (Urban)	Coyote (Urban) vs. Tibet (Rural)	-0.334034	0.738797	1	0.742
Tibet (Semi-Urban) vs. Mayaguez (Urban)	Coyote (Urban) vs. Tibet (Rural)	6.62494	5.17486e-10	9.48863e-06	0.001
Tibet (Semi-Urban) vs. Mbalmayo (Semi-Urban)	Coyote (Urban) vs. Tibet (Rural)	-25.3404	1.5774e-70	2.89231e-66	0.001
Tibet (Semi-Urban) vs. all	Coyote (Urban) vs. Tibet (Rural)	-16.7388	5.09492e-32	9.34204e-28	0.001
Tibet (Semi-Urban) vs. all	Coyote (Urban) vs. Tibet (Rural)	-23.3893	7.11499e-67	1.3046e-62	0.001
Tibet (Semi-Urban) vs. Sparrow (Urban)	Coyote (Urban) vs. Tibet (Rural)	17.8553	0	0	0.001
Tibet (Semi-Urban) vs. Tibet (Rural)	Coyote (Urban) vs. Tibet (Rural)	-25.4465	9.26906e-55	1.69957e-50	0.001
Tibet (Semi-Urban) vs. Tibet (Semi-Urban)	Coyote (Urban) vs. Tibet (Rural)	-18.3261	1.22594e-34	2.24788e-30	0.001
Tibet (Semi-Urban) vs. Tibet (Urban)	Coyote (Urban) vs. Tibet (Rural)	-22.9056	1.55331e-49	2.84815e-45	0.001
Tibet (Semi-Urban) vs. USA (Urban)	Coyote (Urban) vs. Tibet (Rural)	-25.4118	6.79765e-123	1.24642e-118	0.001
Tibet (Semi-Urban) vs. Venezuela (Rural)	Coyote (Urban) vs. Tibet (Rural)	-23.2996	2.38873e-75	4.37997e-71	0.001
Tibet (Semi-Urban) vs. Yaounde (Urban)	Coyote (Urban) vs. Tibet (Rural)	-27.2407	2.99357e-84	5.48901e-80	0.001
Tibet (Urban) vs. Tibet (Urban)	Coyote (Urban) vs. Tibet (Rural)	-15.2612	1.64053e-28	3.00807e-24	0.001
USA (Urban) vs. Coyote (Rural)	Coyote (Urban) vs. Tibet (Rural)	6.69805	2.20697e-11	4.0467e-07	0.001
USA (Urban) vs. Coyote (Urban)	Coyote (Urban) vs. Tibet (Rural)	-1.30619	0.191616	1	0.168
USA (Urban) vs. Mayaguez (Urban)	Coyote (Urban) vs. Tibet (Rural)	18.3416	0	0	0.001
USA (Urban) vs. Mbalmayo (Semi-Urban)	Coyote (Urban) vs. Tibet (Rural)	-19.8117	4.49278e-84	8.23796e-80	0.001
USA (Urban) vs. all	Coyote (Urban) vs. Tibet (Rural)	-23.9029	4.76814e-100	8.74285e-96	0.001
USA (Urban) vs. all	Coyote (Urban) vs. Tibet (Rural)	-32.3278	3.2024e-210	5.87192e-206	0.001
USA (Urban) vs. Sparrow (Urban)	Coyote (Urban) vs. Tibet (Rural)	58.9018	0	0	0.001
USA (Urban) vs. Tibet (Rural)	Coyote (Urban) vs. Tibet (Rural)	-22.513	1.07278e-99	1.96705e-95	0.001
USA (Urban) vs. Tibet (Urban)	Coyote (Urban) vs. Tibet (Rural)	-26.0215	5.91071e-128	1.08379e-123	0.001
USA (Urban) vs. USA (Urban)	Coyote (Urban) vs. Tibet (Rural)	-36.1736	1.38095e-279	2.53211e-275	0.001
USA (Urban) vs. Venezuela (Rural)	Coyote (Urban) vs. Tibet (Rural)	-16.6414	3.0417e-61	5.57727e-57	0.001
Venezuela (Rural) vs. Venezuela (Rural)	Coyote (Urban) vs. Tibet (Rural)	-30.2025	2.29012e-133	4.19916e-129	0.001
Yaounde (Urban) vs. Coyote (Rural)	Coyote (Urban) vs. Tibet (Rural)	7.92173	4.44089e-15	8.14282e-11	0.001
Yaounde (Urban) vs. Coyote (Urban)	Coyote (Urban) vs. Tibet (Rural)	-0.979488	0.327982	1	0.291
Yaounde (Urban) vs. Mayaguez (Urban)	Coyote (Urban) vs. Tibet (Rural)	9.7923	0	0	0.001
Yaounde (Urban) vs. Mbalmayo (Semi-Urban)	Coyote (Urban) vs. Tibet (Rural)	-31.1114	2.7789e-133	5.0954e-129	0.001
Yaounde (Urban) vs. all	Coyote (Urban) vs. Tibet (Rural)	-22.978	2.9109e-57	5.33744e-53	0.001
Yaounde (Urban) vs. all	Coyote (Urban) vs. Tibet (Rural)	-25.0528	6.68553e-102	1.22586e-97	0.001
Yaounde (Urban) vs. Sparrow (Urban)	Coyote (Urban) vs. Tibet (Rural)	30.1468	0	0	0.001
Yaounde (Urban) vs. Tibet (Rural)	Coyote (Urban) vs. Tibet (Rural)	-33.7636	7.20343e-106	1.32082e-101	0.001
Yaounde (Urban) vs. Tibet (Urban)	Coyote (Urban) vs. Tibet (Rural)	-28.5162	1.16745e-88	2.14064e-84	0.001
Yaounde (Urban) vs. USA (Urban)	Coyote (Urban) vs. Tibet (Rural)	-22.2106	1.63705e-105	3.00169e-101	0.001
Yaounde (Urban) vs. Venezuela (Rural)	Coyote (Urban) vs. Tibet (Rural)	-25.5823	3.39096e-115	6.21766e-111	0.001
Yaounde (Urban) vs. Yaounde (Urban)	Coyote (Urban) vs. Tibet (Rural)	-29.9379	3.25896e-112	5.97563e-108	0.001
All between population	Coyote (Urban) vs. Tibet (Urban)	-3.29691	0.000977699	1	0.006
All within population	Coyote (Urban) vs. Tibet (Urban)	-27.6398	2.06762e-166	3.79119e-162	0.001
Coyote (Rural) vs. Coyote (Rural)	Coyote (Urban) vs. Tibet (Urban)	-20.4151	2.50594e-81	4.59489e-77	0.001
Coyote (Rural) vs. Coyote (Urban)	Coyote (Urban) vs. Tibet (Urban)	-15.5542	4.6372e-46	8.50277e-42	0.001
Coyote (Rural) vs. Mayaguez (Urban)	Coyote (Urban) vs. Tibet (Urban)	20.2995	0	0	0.001
Coyote (Rural) vs. Mbalmayo (Semi-Urban)	Coyote (Urban) vs. Tibet (Urban)	14.6262	0	0	0.001
Coyote (Rural) vs. all	Coyote (Urban) vs. Tibet (Urban)	12.386	0	0	0.001
Coyote (Rural) vs. Sparrow (Urban)	Coyote (Urban) vs. Tibet (Urban)	37.1868	0	0	0.001
Coyote (Rural) vs. Tibet (Rural)	Coyote (Urban) vs. Tibet (Urban)	9.73826	0	0	0.001
Coyote (Rural) vs. Tibet (Urban)	Coyote (Urban) vs. Tibet (Urban)	7.57157	1.82521e-13	3.3467e-09	0.001
Coyote (Rural) vs. Venezuela (Rural)	Coyote (Urban) vs. Tibet (Urban)	17.679	0	0	0.001
Coyote (Urban) vs. Coyote (Urban)	Coyote (Urban) vs. Tibet (Urban)	-11.3484	7.31459e-21	1.3412e-16	0.001
Coyote (Urban) vs. Mayaguez (Urban)	Coyote (Urban) vs. Tibet (Urban)	9.28458	0	0	0.001
Coyote (Urban) vs. Mbalmayo (Semi-Urban)	Coyote (Urban) vs. Tibet (Urban)	0.594851	0.55241	1	0.527
Coyote (Urban) vs. all	Coyote (Urban) vs. Tibet (Urban)	1.37654	0.169622	1	0.176
Coyote (Urban) vs. Sparrow (Urban)	Coyote (Urban) vs. Tibet (Urban)	20.8687	0	0	0.001
Coyote (Urban) vs. Venezuela (Rural)	Coyote (Urban) vs. Tibet (Urban)	1.46584	0.143377	1	0.143
Malawi (Rural) vs. Coyote (Rural)	Coyote (Urban) vs. Tibet (Urban)	20.0988	0	0	0.001
Malawi (Rural) vs. Coyote (Urban)	Coyote (Urban) vs. Tibet (Urban)	1.29103	0.197175	1	0.191
Malawi (Rural) vs. Malawi (Rural)	Coyote (Urban) vs. Tibet (Urban)	-36.6363	9.47747e-211	1.73779e-206	0.001
Malawi (Rural) vs. Maricao (Rural)	Coyote (Urban) vs. Tibet (Urban)	40.4946	0	0	0.001
Malawi (Rural) vs. Mayaguez (Urban)	Coyote (Urban) vs. Tibet (Urban)	22.5515	0	0	0.001
Malawi (Rural) vs. Mbalmayo (Semi-Urban)	Coyote (Urban) vs. Tibet (Urban)	-35.7299	1.43196e-191	2.62563e-187	0.001
Malawi (Rural) vs. all	Coyote (Urban) vs. Tibet (Urban)	-22.078	2.29369e-64	4.20572e-60	0.001
Malawi (Rural) vs. all	Coyote (Urban) vs. Tibet (Urban)	-18.2478	8.74925e-67	1.60426e-62	0.001
Malawi (Rural) vs. Sparrow (Rural)	Coyote (Urban) vs. Tibet (Urban)	37.2736	0	0	0.001
Malawi (Rural) vs. Sparrow (Urban)	Coyote (Urban) vs. Tibet (Urban)	49.6179	0	0	0.001
Malawi (Rural) vs. Tibet (Rural)	Coyote (Urban) vs. Tibet (Urban)	-37.2264	1.61718e-147	2.96526e-143	0.001
Malawi (Rural) vs. Tibet (Semi-Urban)	Coyote (Urban) vs. Tibet (Urban)	-26.7283	4.72253e-99	8.65923e-95	0.001
Malawi (Rural) vs. Tibet (Urban)	Coyote (Urban) vs. Tibet (Urban)	-25.5741	1.91256e-93	3.50686e-89	0.001
Malawi (Rural) vs. USA (Urban)	Coyote (Urban) vs. Tibet (Urban)	-17.5727	2.68066e-68	4.91526e-64	0.001
Malawi (Rural) vs. Venezuela (Rural)	Coyote (Urban) vs. Tibet (Urban)	-32.4909	1.9701e-188	3.61238e-184	0.001
Malawi (Rural) vs. Yaounde (Urban)	Coyote (Urban) vs. Tibet (Urban)	-28.5101	1.30876e-145	2.39973e-141	0.001
Maricao (Rural) (non-cristatellus)noncristatellus vs. Coyote (Rural)	Coyote (Urban) vs. Tibet (Urban)	39.3689	0	0	0.001
Maricao (Rural) (non-cristatellus)noncristatellus vs. Coyote (Urban)	Coyote (Urban) vs. Tibet (Urban)	17.9651	0	0	0.001
Maricao (Rural) (non-cristatellus)noncristatellus vs. Malawi (Rural)	Coyote (Urban) vs. Tibet (Urban)	40.4536	0	0	0.001
Maricao (Rural) (non-cristatellus)noncristatellus vs. Maricao (Rural)	Coyote (Urban) vs. Tibet (Urban)	-20.451	2.33942e-79	4.28957e-75	0.001
Maricao (Rural) (non-cristatellus)noncristatellus vs. Maricao (Rural) (non-cristatellus)noncristatellus	Coyote (Urban) vs. Tibet (Urban)	-24.6502	1.3364e-90	2.45042e-86	0.001
Maricao (Rural) (non-cristatellus)noncristatellus vs. Mayaguez (Urban)	Coyote (Urban) vs. Tibet (Urban)	-20.6575	1.7509e-64	3.21046e-60	0.001
Maricao (Rural) (non-cristatellus)noncristatellus vs. Mbalmayo (Semi-Urban)	Coyote (Urban) vs. Tibet (Urban)	23.8602	0	0	0.001
Maricao (Rural) (non-cristatellus)noncristatellus vs. all	Coyote (Urban) vs. Tibet (Urban)	10.9951	0	0	0.001
Maricao (Rural) (non-cristatellus)noncristatellus vs. all	Coyote (Urban) vs. Tibet (Urban)	21.4251	0	0	0.001
Maricao (Rural) (non-cristatellus)noncristatellus vs. Sparrow (Rural)	Coyote (Urban) vs. Tibet (Urban)	30.1305	0	0	0.001
Maricao (Rural) (non-cristatellus)noncristatellus vs. Sparrow (Urban)	Coyote (Urban) vs. Tibet (Urban)	41.6891	0	0	0.001
Maricao (Rural) (non-cristatellus)noncristatellus vs. Tibet (Rural)	Coyote (Urban) vs. Tibet (Urban)	16.6986	0	0	0.001
Maricao (Rural) (non-cristatellus)noncristatellus vs. Tibet (Semi-Urban)	Coyote (Urban) vs. Tibet (Urban)	15.3338	0	0	0.001
Maricao (Rural) (non-cristatellus)noncristatellus vs. Tibet (Urban)	Coyote (Urban) vs. Tibet (Urban)	14.9017	0	0	0.001
Maricao (Rural) (non-cristatellus)noncristatellus vs. USA (Urban)	Coyote (Urban) vs. Tibet (Urban)	37.9127	0	0	0.001
Maricao (Rural) (non-cristatellus)noncristatellus vs. Venezuela (Rural)	Coyote (Urban) vs. Tibet (Urban)	32.7925	0	0	0.001
Maricao (Rural) (non-cristatellus)noncristatellus vs. Yaounde (Urban)	Coyote (Urban) vs. Tibet (Urban)	22.5561	0	0	0.001
Maricao (Rural) vs. Coyote (Rural)	Coyote (Urban) vs. Tibet (Urban)	38.7599	0	0	0.001
Maricao (Rural) vs. Coyote (Urban)	Coyote (Urban) vs. Tibet (Urban)	18.2175	0	0	0.001
Maricao (Rural) vs. Maricao (Rural)	Coyote (Urban) vs. Tibet (Urban)	-20.6403	6.50483e-73	1.19273e-68	0.001
Maricao (Rural) vs. Mayaguez (Urban)	Coyote (Urban) vs. Tibet (Urban)	-25.0083	4.67459e-85	8.57132e-81	0.001
Maricao (Rural) vs. Mbalmayo (Semi-Urban)	Coyote (Urban) vs. Tibet (Urban)	23.7155	0	0	0.001
Maricao (Rural) vs. all	Coyote (Urban) vs. Tibet (Urban)	11.2163	0	0	0.001
Maricao (Rural) vs. all	Coyote (Urban) vs. Tibet (Urban)	20.9932	0	0	0.001
Maricao (Rural) vs. Sparrow (Urban)	Coyote (Urban) vs. Tibet (Urban)	43.715	0	0	0.001
Maricao (Rural) vs. Tibet (Rural)	Coyote (Urban) vs. Tibet (Urban)	17.1962	0	0	0.001
Maricao (Rural) vs. Tibet (Semi-Urban)	Coyote (Urban) vs. Tibet (Urban)	15.6721	0	0	0.001
Maricao (Rural) vs. Tibet (Urban)	Coyote (Urban) vs. Tibet (Urban)	15.2208	0	0	0.001
Maricao (Rural) vs. USA (Urban)	Coyote (Urban) vs. Tibet (Urban)	34.1666	0	0	0.001
Maricao (Rural) vs. Venezuela (Rural)	Coyote (Urban) vs. Tibet (Urban)	32.6985	0	0	0.001
Maricao (Rural) vs. Yaounde (Urban)	Coyote (Urban) vs. Tibet (Urban)	21.9495	0	0	0.001
Mayaguez (Urban) vs. Mayaguez (Urban)	Coyote (Urban) vs. Tibet (Urban)	-20.8924	2.8109e-42	5.15407e-38	0.001
Mbalmayo (Semi-Urban) vs. Mbalmayo (Semi-Urban)	Coyote (Urban) vs. Tibet (Urban)	-33.6254	1.00576e-101	1.84415e-97	0.001
Ngoantet (Rural) vs. Coyote (Rural)	Coyote (Urban) vs. Tibet (Urban)	16.4699	0	0	0.001
Ngoantet (Rural) vs. Coyote (Urban)	Coyote (Urban) vs. Tibet (Urban)	0.886657	0.375512	1	0.366
Ngoantet (Rural) vs. Malawi (Rural)	Coyote (Urban) vs. Tibet (Urban)	-34.6502	3.50977e-232	6.43551e-228	0.001
Ngoantet (Rural) vs. Maricao (Rural)	Coyote (Urban) vs. Tibet (Urban)	39.9255	0	0	0.001
Ngoantet (Rural) vs. Maricao (Rural) (non-cristatellus)noncristatellus	Coyote (Urban) vs. Tibet (Urban)	41.5919	0	0	0.001
Ngoantet (Rural) vs. Mayaguez (Urban)	Coyote (Urban) vs. Tibet (Urban)	23.6013	0	0	0.001
Ngoantet (Rural) vs. Mbalmayo (Semi-Urban)	Coyote (Urban) vs. Tibet (Urban)	-36.1439	3.49008e-213	6.39941e-209	0.001
Ngoantet (Rural) vs. all	Coyote (Urban) vs. Tibet (Urban)	-25.27	3.80726e-84	6.981e-80	0.001
Ngoantet (Rural) vs. all	Coyote (Urban) vs. Tibet (Urban)	-20.4784	1.40969e-84	2.58481e-80	0.001
Ngoantet (Rural) vs. Ngoantet (Rural)	Coyote (Urban) vs. Tibet (Urban)	-34.5986	6.71228e-222	1.23076e-217	0.001
Ngoantet (Rural) vs. Sparrow (Rural)	Coyote (Urban) vs. Tibet (Urban)	40.6294	0	0	0.001
Ngoantet (Rural) vs. Sparrow (Urban)	Coyote (Urban) vs. Tibet (Urban)	52.0293	0	0	0.001
Ngoantet (Rural) vs. Tibet (Rural)	Coyote (Urban) vs. Tibet (Urban)	-40.4974	7.81098e-186	1.43222e-181	0.001
Ngoantet (Rural) vs. Tibet (Semi-Urban)	Coyote (Urban) vs. Tibet (Urban)	-28.1951	1.51663e-117	2.78089e-113	0.001
Ngoantet (Rural) vs. Tibet (Urban)	Coyote (Urban) vs. Tibet (Urban)	-29.0389	2.16062e-122	3.96172e-118	0.001
Ngoantet (Rural) vs. USA (Urban)	Coyote (Urban) vs. Tibet (Urban)	-19.1127	1.26139e-80	2.31289e-76	0.001
Ngoantet (Rural) vs. Venezuela (Rural)	Coyote (Urban) vs. Tibet (Urban)	-29.7709	3.81827e-171	7.00118e-167	0.001
Ngoantet (Rural) vs. Yaounde (Urban)	Coyote (Urban) vs. Tibet (Urban)	-29.7431	3.59386e-165	6.5897e-161	0.001
Sparrow (Rural) vs. Coyote (Rural)	Coyote (Urban) vs. Tibet (Urban)	27.5235	0	0	0.001
Sparrow (Rural) vs. Coyote (Urban)	Coyote (Urban) vs. Tibet (Urban)	14.9696	0	0	0.001
Sparrow (Rural) vs. Maricao (Rural)	Coyote (Urban) vs. Tibet (Urban)	31.2681	0	0	0.001
Sparrow (Rural) vs. Mayaguez (Urban)	Coyote (Urban) vs. Tibet (Urban)	17.0649	0	0	0.001
Sparrow (Rural) vs. Mbalmayo (Semi-Urban)	Coyote (Urban) vs. Tibet (Urban)	23.275	0	0	0.001
Sparrow (Rural) vs. all	Coyote (Urban) vs. Tibet (Urban)	10.3435	0	0	0.001
Sparrow (Rural) vs. all	Coyote (Urban) vs. Tibet (Urban)	27.2259	0	0	0.001
Sparrow (Rural) vs. Sparrow (Rural)	Coyote (Urban) vs. Tibet (Urban)	-11.2535	4.28374e-25	7.85467e-21	0.001
Sparrow (Rural) vs. Sparrow (Urban)	Coyote (Urban) vs. Tibet (Urban)	-9.65143	2.97842e-21	5.46124e-17	0.001
Sparrow (Rural) vs. Tibet (Rural)	Coyote (Urban) vs. Tibet (Urban)	15.2555	0	0	0.001
Sparrow (Rural) vs. Tibet (Semi-Urban)	Coyote (Urban) vs. Tibet (Urban)	15.1263	0	0	0.001
Sparrow (Rural) vs. Tibet (Urban)	Coyote (Urban) vs. Tibet (Urban)	13.6643	0	0	0.001
Sparrow (Rural) vs. USA (Urban)	Coyote (Urban) vs. Tibet (Urban)	57.5812	0	0	0.001
Sparrow (Rural) vs. Venezuela (Rural)	Coyote (Urban) vs. Tibet (Urban)	29.4386	0	0	0.001
Sparrow (Rural) vs. Yaounde (Urban)	Coyote (Urban) vs. Tibet (Urban)	26.3964	0	0	0.001
Sparrow (Urban) vs. Sparrow (Urban)	Coyote (Urban) vs. Tibet (Urban)	-8.30969	2.65588e-16	4.86982e-12	0.001
Tibet (Rural) vs. Tibet (Rural)	Coyote (Urban) vs. Tibet (Urban)	-20.8124	3.12702e-39	5.73371e-35	0.001
Tibet (Semi-Urban) vs. Coyote (Rural)	Coyote (Urban) vs. Tibet (Urban)	8.55408	2.22045e-16	4.07141e-12	0.001
Tibet (Semi-Urban) vs. Coyote (Urban)	Coyote (Urban) vs. Tibet (Urban)	0.172957	0.862907	1	0.845
Tibet (Semi-Urban) vs. Mayaguez (Urban)	Coyote (Urban) vs. Tibet (Urban)	8.02738	2.13163e-13	3.90855e-09	0.001
Tibet (Semi-Urban) vs. Mbalmayo (Semi-Urban)	Coyote (Urban) vs. Tibet (Urban)	-25.5429	3.80748e-71	6.98139e-67	0.001
Tibet (Semi-Urban) vs. all	Coyote (Urban) vs. Tibet (Urban)	-17.5608	1.08437e-33	1.9883e-29	0.001
Tibet (Semi-Urban) vs. all	Coyote (Urban) vs. Tibet (Urban)	-23.5824	1.59792e-67	2.92995e-63	0.001
Tibet (Semi-Urban) vs. Sparrow (Urban)	Coyote (Urban) vs. Tibet (Urban)	21.2136	0	0	0.001
Tibet (Semi-Urban) vs. Tibet (Rural)	Coyote (Urban) vs. Tibet (Urban)	-26.3496	1.54727e-56	2.83708e-52	0.001
Tibet (Semi-Urban) vs. Tibet (Semi-Urban)	Coyote (Urban) vs. Tibet (Urban)	-19.3467	1.45414e-36	2.66631e-32	0.001
Tibet (Semi-Urban) vs. Tibet (Urban)	Coyote (Urban) vs. Tibet (Urban)	-23.8365	1.73015e-51	3.1724e-47	0.001
Tibet (Semi-Urban) vs. USA (Urban)	Coyote (Urban) vs. Tibet (Urban)	-24.7736	1.16352e-117	2.13343e-113	0.001
Tibet (Semi-Urban) vs. Venezuela (Rural)	Coyote (Urban) vs. Tibet (Urban)	-23.1114	1.46728e-74	2.6904e-70	0.001
Tibet (Semi-Urban) vs. Yaounde (Urban)	Coyote (Urban) vs. Tibet (Urban)	-27.3155	1.64196e-84	3.0107e-80	0.001
Tibet (Urban) vs. Tibet (Urban)	Coyote (Urban) vs. Tibet (Urban)	-15.8587	9.56444e-30	1.75374e-25	0.001
USA (Urban) vs. Coyote (Rural)	Coyote (Urban) vs. Tibet (Urban)	8.19838	2.22045e-16	4.07141e-12	0.001
USA (Urban) vs. Coyote (Urban)	Coyote (Urban) vs. Tibet (Urban)	-0.467743	0.640012	1	0.646
USA (Urban) vs. Mayaguez (Urban)	Coyote (Urban) vs. Tibet (Urban)	21.9847	0	0	0.001
USA (Urban) vs. Mbalmayo (Semi-Urban)	Coyote (Urban) vs. Tibet (Urban)	-19.1589	6.17392e-79	1.13205e-74	0.001
USA (Urban) vs. all	Coyote (Urban) vs. Tibet (Urban)	-23.3684	1.55606e-96	2.85319e-92	0.001
USA (Urban) vs. all	Coyote (Urban) vs. Tibet (Urban)	-31.6251	5.6793e-202	1.04136e-197	0.001
USA (Urban) vs. Sparrow (Urban)	Coyote (Urban) vs. Tibet (Urban)	66.2966	0	0	0.001
USA (Urban) vs. Tibet (Rural)	Coyote (Urban) vs. Tibet (Urban)	-21.878	7.97636e-95	1.46255e-90	0.001
USA (Urban) vs. Tibet (Urban)	Coyote (Urban) vs. Tibet (Urban)	-25.4063	7.54966e-123	1.38431e-118	0.001
USA (Urban) vs. USA (Urban)	Coyote (Urban) vs. Tibet (Urban)	-35.5181	7.44259e-270	1.36467e-265	0.001
USA (Urban) vs. Venezuela (Rural)	Coyote (Urban) vs. Tibet (Urban)	-15.9874	9.91157e-57	1.81739e-52	0.001
Venezuela (Rural) vs. Venezuela (Rural)	Coyote (Urban) vs. Tibet (Urban)	-29.8524	3.02813e-131	5.55238e-127	0.001
Yaounde (Urban) vs. Coyote (Rural)	Coyote (Urban) vs. Tibet (Urban)	9.56655	0	0	0.001
Yaounde (Urban) vs. Coyote (Urban)	Coyote (Urban) vs. Tibet (Urban)	-0.411002	0.68131	1	0.691
Yaounde (Urban) vs. Mayaguez (Urban)	Coyote (Urban) vs. Tibet (Urban)	11.9705	0	0	0.001
Yaounde (Urban) vs. Mbalmayo (Semi-Urban)	Coyote (Urban) vs. Tibet (Urban)	-30.7798	2.0306e-131	3.72331e-127	0.001
Yaounde (Urban) vs. all	Coyote (Urban) vs. Tibet (Urban)	-23.2998	4.00164e-58	7.3374e-54	0.001
Yaounde (Urban) vs. all	Coyote (Urban) vs. Tibet (Urban)	-24.6082	3.15111e-99	5.77788e-95	0.001
Yaounde (Urban) vs. Sparrow (Urban)	Coyote (Urban) vs. Tibet (Urban)	35.5155	0	0	0.001
Yaounde (Urban) vs. Tibet (Rural)	Coyote (Urban) vs. Tibet (Urban)	-34.1586	4.19116e-107	7.68491e-103	0.001
Yaounde (Urban) vs. Tibet (Urban)	Coyote (Urban) vs. Tibet (Urban)	-28.8078	1.17976e-89	2.1632e-85	0.001
Yaounde (Urban) vs. USA (Urban)	Coyote (Urban) vs. Tibet (Urban)	-21.5677	8.50503e-100	1.55948e-95	0.001
Yaounde (Urban) vs. Venezuela (Rural)	Coyote (Urban) vs. Tibet (Urban)	-25.1231	6.43536e-112	1.17999e-107	0.001
Yaounde (Urban) vs. Yaounde (Urban)	Coyote (Urban) vs. Tibet (Urban)	-29.7225	3.1429e-111	5.76281e-107	0.001
All between population	Coyote (Urban) vs. Venezuela (Rural)	-9.17025	4.75897e-20	8.72605e-16	0.001
All within population	Coyote (Urban) vs. Venezuela (Rural)	-62.891	0	0	0.001
Coyote (Rural) vs. Coyote (Rural)	Coyote (Urban) vs. Venezuela (Rural)	-44.5902	1.97884e-288	3.6284e-284	0.001
Coyote (Rural) vs. Coyote (Urban)	Coyote (Urban) vs. Venezuela (Rural)	-32.7507	2.00684e-155	3.67974e-151	0.001
Coyote (Rural) vs. Mayaguez (Urban)	Coyote (Urban) vs. Venezuela (Rural)	14.9661	0	0	0.001
Coyote (Rural) vs. Mbalmayo (Semi-Urban)	Coyote (Urban) vs. Venezuela (Rural)	13.2579	0	0	0.001
Coyote (Rural) vs. all	Coyote (Urban) vs. Venezuela (Rural)	11.9828	0	0	0.001
Coyote (Rural) vs. Sparrow (Urban)	Coyote (Urban) vs. Venezuela (Rural)	32.0165	0	0	0.001
Coyote (Rural) vs. Tibet (Rural)	Coyote (Urban) vs. Venezuela (Rural)	6.87724	1.2365e-11	2.26725e-07	0.001
Coyote (Rural) vs. Tibet (Urban)	Coyote (Urban) vs. Venezuela (Rural)	5.15798	3.15519e-07	0.00578536	0.001
Coyote (Rural) vs. Venezuela (Rural)	Coyote (Urban) vs. Venezuela (Rural)	16.9405	0	0	0.001
Coyote (Urban) vs. Coyote (Urban)	Coyote (Urban) vs. Venezuela (Rural)	-17.0819	3.92192e-50	7.19123e-46	0.001
Coyote (Urban) vs. Mbalmayo (Semi-Urban)	Coyote (Urban) vs. Venezuela (Rural)	-1.06003	0.289565	1	0.278
Coyote (Urban) vs. Sparrow (Urban)	Coyote (Urban) vs. Venezuela (Rural)	14.9886	0	0	0.001
Malawi (Rural) vs. Coyote (Rural)	Coyote (Urban) vs. Venezuela (Rural)	21.797	0	0	0.001
Malawi (Rural) vs. Coyote (Urban)	Coyote (Urban) vs. Venezuela (Rural)	-0.102449	0.918423	1	0.905
Malawi (Rural) vs. Malawi (Rural)	Coyote (Urban) vs. Venezuela (Rural)	-75.2602	0	0	0.001
Malawi (Rural) vs. Maricao (Rural)	Coyote (Urban) vs. Venezuela (Rural)	30.6045	0	0	0.001
Malawi (Rural) vs. Mayaguez (Urban)	Coyote (Urban) vs. Venezuela (Rural)	15.9608	0	0	0.001
Malawi (Rural) vs. Mbalmayo (Semi-Urban)	Coyote (Urban) vs. Venezuela (Rural)	-69.6144	0	0	0.001
Malawi (Rural) vs. all	Coyote (Urban) vs. Venezuela (Rural)	-33.8323	1.19895e-140	2.19839e-136	0.001
Malawi (Rural) vs. all	Coyote (Urban) vs. Venezuela (Rural)	-37.9864	3.06235e-228	5.61513e-224	0.001
Malawi (Rural) vs. Sparrow (Rural)	Coyote (Urban) vs. Venezuela (Rural)	27.4016	0	0	0.001
Malawi (Rural) vs. Sparrow (Urban)	Coyote (Urban) vs. Venezuela (Rural)	38.0693	0	0	0.001
Malawi (Rural) vs. Tibet (Rural)	Coyote (Urban) vs. Venezuela (Rural)	-53.9062	3.65083e-270	6.69416e-266	0.001
Malawi (Rural) vs. Tibet (Semi-Urban)	Coyote (Urban) vs. Venezuela (Rural)	-43.8386	4.97511e-216	9.12235e-212	0.001
Malawi (Rural) vs. Tibet (Urban)	Coyote (Urban) vs. Venezuela (Rural)	-39.2691	1.09371e-189	2.00542e-185	0.001
Malawi (Rural) vs. USA (Urban)	Coyote (Urban) vs. Venezuela (Rural)	-41.57	0	0	0.001
Malawi (Rural) vs. Venezuela (Rural)	Coyote (Urban) vs. Venezuela (Rural)	-68.947	0	0	0.001
Malawi (Rural) vs. Yaounde (Urban)	Coyote (Urban) vs. Venezuela (Rural)	-59.5706	0	0	0.001
Maricao (Rural) (non-cristatellus)noncristatellus vs. Coyote (Rural)	Coyote (Urban) vs. Venezuela (Rural)	30.3935	0	0	0.001
Maricao (Rural) (non-cristatellus)noncristatellus vs. Coyote (Urban)	Coyote (Urban) vs. Venezuela (Rural)	12.6655	0	0	0.001
Maricao (Rural) (non-cristatellus)noncristatellus vs. Malawi (Rural)	Coyote (Urban) vs. Venezuela (Rural)	30.3126	0	0	0.001
Maricao (Rural) (non-cristatellus)noncristatellus vs. Maricao (Rural)	Coyote (Urban) vs. Venezuela (Rural)	-42.6356	4.12981e-257	7.57241e-253	0.001
Maricao (Rural) (non-cristatellus)noncristatellus vs. Maricao (Rural) (non-cristatellus)noncristatellus	Coyote (Urban) vs. Venezuela (Rural)	-46.3334	5.81807e-234	1.0668e-229	0.001
Maricao (Rural) (non-cristatellus)noncristatellus vs. Mayaguez (Urban)	Coyote (Urban) vs. Venezuela (Rural)	-32.4336	9.5239e-141	1.7463e-136	0.001
Maricao (Rural) (non-cristatellus)noncristatellus vs. Mbalmayo (Semi-Urban)	Coyote (Urban) vs. Venezuela (Rural)	17.0866	0	0	0.001
Maricao (Rural) (non-cristatellus)noncristatellus vs. all	Coyote (Urban) vs. Venezuela (Rural)	7.52576	2.44471e-13	4.48262e-09	0.001
Maricao (Rural) (non-cristatellus)noncristatellus vs. all	Coyote (Urban) vs. Venezuela (Rural)	15.3375	0	0	0.001
Maricao (Rural) (non-cristatellus)noncristatellus vs. Sparrow (Rural)	Coyote (Urban) vs. Venezuela (Rural)	21.6934	0	0	0.001
Maricao (Rural) (non-cristatellus)noncristatellus vs. Sparrow (Urban)	Coyote (Urban) vs. Venezuela (Rural)	30.6513	0	0	0.001
Maricao (Rural) (non-cristatellus)noncristatellus vs. Tibet (Rural)	Coyote (Urban) vs. Venezuela (Rural)	11.7598	0	0	0.001
Maricao (Rural) (non-cristatellus)noncristatellus vs. Tibet (Semi-Urban)	Coyote (Urban) vs. Venezuela (Rural)	10.7176	0	0	0.001
Maricao (Rural) (non-cristatellus)noncristatellus vs. Tibet (Urban)	Coyote (Urban) vs. Venezuela (Rural)	10.2996	0	0	0.001
Maricao (Rural) (non-cristatellus)noncristatellus vs. USA (Urban)	Coyote (Urban) vs. Venezuela (Rural)	39.3929	0	0	0.001
Maricao (Rural) (non-cristatellus)noncristatellus vs. Venezuela (Rural)	Coyote (Urban) vs. Venezuela (Rural)	24.7853	0	0	0.001
Maricao (Rural) (non-cristatellus)noncristatellus vs. Yaounde (Urban)	Coyote (Urban) vs. Venezuela (Rural)	17.0753	0	0	0.001
Maricao (Rural) vs. Coyote (Rural)	Coyote (Urban) vs. Venezuela (Rural)	30.5909	0	0	0.001
Maricao (Rural) vs. Coyote (Urban)	Coyote (Urban) vs. Venezuela (Rural)	12.8441	0	0	0.001
Maricao (Rural) vs. Maricao (Rural)	Coyote (Urban) vs. Venezuela (Rural)	-40.5587	1.28236e-208	2.35133e-204	0.001
Maricao (Rural) vs. Mayaguez (Urban)	Coyote (Urban) vs. Venezuela (Rural)	-39.9193	1.82562e-184	3.34746e-180	0.001
Maricao (Rural) vs. Mbalmayo (Semi-Urban)	Coyote (Urban) vs. Venezuela (Rural)	17.1929	0	0	0.001
Maricao (Rural) vs. all	Coyote (Urban) vs. Venezuela (Rural)	7.65039	9.9476e-14	1.82399e-09	0.001
Maricao (Rural) vs. all	Coyote (Urban) vs. Venezuela (Rural)	15.0239	0	0	0.001
Maricao (Rural) vs. Sparrow (Urban)	Coyote (Urban) vs. Venezuela (Rural)	32.0464	0	0	0.001
Maricao (Rural) vs. Tibet (Rural)	Coyote (Urban) vs. Venezuela (Rural)	12.1157	0	0	0.001
Maricao (Rural) vs. Tibet (Semi-Urban)	Coyote (Urban) vs. Venezuela (Rural)	10.8946	0	0	0.001
Maricao (Rural) vs. Tibet (Urban)	Coyote (Urban) vs. Venezuela (Rural)	10.5002	0	0	0.001
Maricao (Rural) vs. USA (Urban)	Coyote (Urban) vs. Venezuela (Rural)	37.1277	0	0	0.001
Maricao (Rural) vs. Venezuela (Rural)	Coyote (Urban) vs. Venezuela (Rural)	25.0473	0	0	0.001
Maricao (Rural) vs. Yaounde (Urban)	Coyote (Urban) vs. Venezuela (Rural)	16.747	0	0	0.001
Mayaguez (Urban) vs. Mayaguez (Urban)	Coyote (Urban) vs. Venezuela (Rural)	-20.1231	1.14028e-63	2.09081e-59	0.001
Mbalmayo (Semi-Urban) vs. Mbalmayo (Semi-Urban)	Coyote (Urban) vs. Venezuela (Rural)	-49.7385	7.5521e-213	1.38475e-208	0.001
Ngoantet (Rural) vs. Coyote (Rural)	Coyote (Urban) vs. Venezuela (Rural)	19.6155	0	0	0.001
Ngoantet (Rural) vs. Coyote (Urban)	Coyote (Urban) vs. Venezuela (Rural)	-1.02697	0.304648	1	0.295
Ngoantet (Rural) vs. Malawi (Rural)	Coyote (Urban) vs. Venezuela (Rural)	-75.7987	0	0	0.001
Ngoantet (Rural) vs. Maricao (Rural)	Coyote (Urban) vs. Venezuela (Rural)	32.4121	0	0	0.001
Ngoantet (Rural) vs. Maricao (Rural) (non-cristatellus)noncristatellus	Coyote (Urban) vs. Venezuela (Rural)	32.8053	0	0	0.001
Ngoantet (Rural) vs. Mayaguez (Urban)	Coyote (Urban) vs. Venezuela (Rural)	16.6644	0	0	0.001
Ngoantet (Rural) vs. Mbalmayo (Semi-Urban)	Coyote (Urban) vs. Venezuela (Rural)	-74.4751	0	0	0.001
Ngoantet (Rural) vs. all	Coyote (Urban) vs. Venezuela (Rural)	-41.1081	1.11765e-187	2.04933e-183	0.001
Ngoantet (Rural) vs. all	Coyote (Urban) vs. Venezuela (Rural)	-43.7314	6.82316e-303	1.2511e-298	0.001
Ngoantet (Rural) vs. Ngoantet (Rural)	Coyote (Urban) vs. Venezuela (Rural)	-74.8738	0	0	0.001
Ngoantet (Rural) vs. Sparrow (Rural)	Coyote (Urban) vs. Venezuela (Rural)	31.5063	0	0	0.001
Ngoantet (Rural) vs. Sparrow (Urban)	Coyote (Urban) vs. Venezuela (Rural)	43.2756	0	0	0.001
Ngoantet (Rural) vs. Tibet (Rural)	Coyote (Urban) vs. Venezuela (Rural)	-64.3595	0	0	0.001
Ngoantet (Rural) vs. Tibet (Semi-Urban)	Coyote (Urban) vs. Venezuela (Rural)	-50.4579	2.32284e-277	4.25916e-273	0.001
Ngoantet (Rural) vs. Tibet (Urban)	Coyote (Urban) vs. Venezuela (Rural)	-47.6031	1.8053e-259	3.31019e-255	0.001
Ngoantet (Rural) vs. USA (Urban)	Coyote (Urban) vs. Venezuela (Rural)	-45.2463	0	0	0.001
Ngoantet (Rural) vs. Venezuela (Rural)	Coyote (Urban) vs. Venezuela (Rural)	-64.8555	0	0	0.001
Ngoantet (Rural) vs. Yaounde (Urban)	Coyote (Urban) vs. Venezuela (Rural)	-63.967	0	0	0.001
Sparrow (Rural) vs. Coyote (Rural)	Coyote (Urban) vs. Venezuela (Rural)	22.2708	0	0	0.001
Sparrow (Rural) vs. Coyote (Urban)	Coyote (Urban) vs. Venezuela (Rural)	10.5248	0	0	0.001
Sparrow (Rural) vs. Maricao (Rural)	Coyote (Urban) vs. Venezuela (Rural)	22.655	0	0	0.001
Sparrow (Rural) vs. Mayaguez (Urban)	Coyote (Urban) vs. Venezuela (Rural)	12.0398	0	0	0.001
Sparrow (Rural) vs. Mbalmayo (Semi-Urban)	Coyote (Urban) vs. Venezuela (Rural)	16.6028	0	0	0.001
Sparrow (Rural) vs. all	Coyote (Urban) vs. Venezuela (Rural)	7.20559	2.31637e-12	4.24729e-08	0.001
Sparrow (Rural) vs. all	Coyote (Urban) vs. Venezuela (Rural)	19.4567	0	0	0.001
Sparrow (Rural) vs. Sparrow (Rural)	Coyote (Urban) vs. Venezuela (Rural)	-15.899	4.07063e-48	7.4639e-44	0.001
Sparrow (Rural) vs. Sparrow (Urban)	Coyote (Urban) vs. Venezuela (Rural)	-18.7229	2.85726e-70	5.23907e-66	0.001
Sparrow (Rural) vs. Tibet (Rural)	Coyote (Urban) vs. Venezuela (Rural)	10.7478	0	0	0.001
Sparrow (Rural) vs. Tibet (Semi-Urban)	Coyote (Urban) vs. Venezuela (Rural)	10.6768	0	0	0.001
Sparrow (Rural) vs. Tibet (Urban)	Coyote (Urban) vs. Venezuela (Rural)	9.60277	0	0	0.001
Sparrow (Rural) vs. USA (Urban)	Coyote (Urban) vs. Venezuela (Rural)	51.5928	0	0	0.001
Sparrow (Rural) vs. Venezuela (Rural)	Coyote (Urban) vs. Venezuela (Rural)	21.8304	0	0	0.001
Sparrow (Rural) vs. Yaounde (Urban)	Coyote (Urban) vs. Venezuela (Rural)	19.1788	0	0	0.001
Sparrow (Urban) vs. Sparrow (Urban)	Coyote (Urban) vs. Venezuela (Rural)	-16.6431	4.41324e-57	8.09212e-53	0.001
Tibet (Rural) vs. Tibet (Rural)	Coyote (Urban) vs. Venezuela (Rural)	-26.2892	1.13797e-89	2.08659e-85	0.001
Tibet (Semi-Urban) vs. Coyote (Rural)	Coyote (Urban) vs. Venezuela (Rural)	5.87919	6.06886e-09	0.000111279	0.001
Tibet (Semi-Urban) vs. Coyote (Urban)	Coyote (Urban) vs. Venezuela (Rural)	-1.25706	0.209371	1	0.232
Tibet (Semi-Urban) vs. Mayaguez (Urban)	Coyote (Urban) vs. Venezuela (Rural)	5.38708	1.14745e-07	0.00210397	0.001
Tibet (Semi-Urban) vs. Mbalmayo (Semi-Urban)	Coyote (Urban) vs. Venezuela (Rural)	-35.9995	2.75911e-146	5.0591e-142	0.001
Tibet (Semi-Urban) vs. all	Coyote (Urban) vs. Venezuela (Rural)	-18.3031	3.94448e-55	7.23259e-51	0.001
Tibet (Semi-Urban) vs. all	Coyote (Urban) vs. Venezuela (Rural)	-31.5895	2.40104e-127	4.40255e-123	0.001
Tibet (Semi-Urban) vs. Sparrow (Urban)	Coyote (Urban) vs. Venezuela (Rural)	15.0279	0	0	0.001
Tibet (Semi-Urban) vs. Tibet (Rural)	Coyote (Urban) vs. Venezuela (Rural)	-30.4472	1.42628e-110	2.61523e-106	0.001
Tibet (Semi-Urban) vs. Tibet (Semi-Urban)	Coyote (Urban) vs. Venezuela (Rural)	-19.6392	7.51065e-61	1.37715e-56	0.001
Tibet (Semi-Urban) vs. Tibet (Urban)	Coyote (Urban) vs. Venezuela (Rural)	-26.1666	7.51908e-92	1.3787e-87	0.001
Tibet (Semi-Urban) vs. USA (Urban)	Coyote (Urban) vs. Venezuela (Rural)	-52.133	0	0	0.001
Tibet (Semi-Urban) vs. Venezuela (Rural)	Coyote (Urban) vs. Venezuela (Rural)	-38.1375	2.89664e-171	5.31128e-167	0.001
Tibet (Semi-Urban) vs. Yaounde (Urban)	Coyote (Urban) vs. Venezuela (Rural)	-40.6774	6.71439e-176	1.23115e-171	0.001
Tibet (Urban) vs. Tibet (Urban)	Coyote (Urban) vs. Venezuela (Rural)	-17.6579	3.46086e-52	6.34584e-48	0.001
USA (Urban) vs. Coyote (Rural)	Coyote (Urban) vs. Venezuela (Rural)	9.40589	0	0	0.001
USA (Urban) vs. Coyote (Urban)	Coyote (Urban) vs. Venezuela (Rural)	-4.92272	9.05718e-07	0.0166073	0.001
USA (Urban) vs. Mayaguez (Urban)	Coyote (Urban) vs. Venezuela (Rural)	17.701	0	0	0.001
USA (Urban) vs. Mbalmayo (Semi-Urban)	Coyote (Urban) vs. Venezuela (Rural)	-43.7698	0	0	0.001
USA (Urban) vs. all	Coyote (Urban) vs. Venezuela (Rural)	-45.3097	5.21515e-269	9.5625e-265	0.001
[truncated: 10,722 more rows]
