# Supplementary material for: Humanization of wildlife gut microbiota in urban environments
Source: eLife. 2022 May 31;11:e76381. doi: 10.7554/eLife.76381 (PMC9203057; doi:10.7554/eLife.76381)
Supplement: Supplementary file 5. [file elife-76381-supp5.xlsx]

## Sheet: Sheet1
Table S5. Statistics for pairwise beta-diversity comparisons based on Bray-Curtis.
Group 1	Group 2	t statistic Bray-Curtis	Parametric p-value	Parametric p-value (Bonferroni-corrected)	Nonparametric p-value
All within population	All between population	-373.326	0	0	0.001
All between population	Coyote (Rural) vs. Coyote (Rural)	65.8692	0	0	0.001
All within population	Coyote (Rural) vs. Coyote (Rural)	-10.8982	1.29458e-27	2.37373e-23	0.001
Malawi (Rural) vs. Malawi (Rural)	Coyote (Rural) vs. Coyote (Rural)	-22.5716	1.18424e-103	2.17142e-99	0.001
Maricao (Rural) (non-cristatellus)noncristatellus vs. Maricao (Rural) (non-cristatellus)noncristatellus	Coyote (Rural) vs. Coyote (Rural)	7.60912	4.44089e-14	8.14282e-10	0.001
Maricao (Rural) vs. Maricao (Rural)	Coyote (Rural) vs. Coyote (Rural)	8.05013	1.33227e-15	2.44285e-11	0.001
Ngoantet (Rural) vs. Ngoantet (Rural)	Coyote (Rural) vs. Coyote (Rural)	-1.34269	0.179444	1	0.162
Sparrow (Rural) vs. Sparrow (Rural)	Coyote (Rural) vs. Coyote (Rural)	9.08874	0	0	0.001
Tibet (Semi-Urban) vs. Tibet (Semi-Urban)	Coyote (Rural) vs. Coyote (Rural)	1.4218	0.155316	1	0.152
USA (Urban) vs. USA (Urban)	Coyote (Rural) vs. Coyote (Rural)	-17.5199	2.39944e-68	4.39962e-64	0.001
Yaounde (Urban) vs. Yaounde (Urban)	Coyote (Rural) vs. Coyote (Rural)	5.72153	1.24156e-08	0.000227653	0.001
All between population	Coyote (Rural) vs. Coyote (Urban)	33.4861	0	0	0.001
All within population	Coyote (Rural) vs. Coyote (Urban)	-13.905	7.65752e-44	1.40408e-39	0.001
Coyote (Rural) vs. Coyote (Rural)	Coyote (Rural) vs. Coyote (Urban)	-4.15652	3.37928e-05	0.619624	0.001
Coyote (Urban) vs. Coyote (Urban)	Coyote (Rural) vs. Coyote (Urban)	0.210513	0.833344	1	0.854
Malawi (Rural) vs. Coyote (Rural)	Coyote (Rural) vs. Coyote (Urban)	65.1346	0	0	0.001
Malawi (Rural) vs. Coyote (Urban)	Coyote (Rural) vs. Coyote (Urban)	24.074	0	0	0.001
Malawi (Rural) vs. Malawi (Rural)	Coyote (Rural) vs. Coyote (Urban)	-24.6945	2.26491e-117	4.15294e-113	0.001
Malawi (Rural) vs. Maricao (Rural)	Coyote (Rural) vs. Coyote (Urban)	55.4664	0	0	0.001
Malawi (Rural) vs. Mayaguez (Urban)	Coyote (Rural) vs. Coyote (Urban)	29.6125	0	0	0.001
Malawi (Rural) vs. Mbalmayo (Semi-Urban)	Coyote (Rural) vs. Coyote (Urban)	-6.34967	2.78169e-10	5.10051e-06	0.001
Malawi (Rural) vs. all	Coyote (Rural) vs. Coyote (Urban)	-1.82176	0.0688975	1	0.089
Malawi (Rural) vs. all	Coyote (Rural) vs. Coyote (Urban)	23.1877	0	0	0.001
Malawi (Rural) vs. Sparrow (Rural)	Coyote (Rural) vs. Coyote (Urban)	45.8325	0	0	0.001
Malawi (Rural) vs. Sparrow (Urban)	Coyote (Rural) vs. Coyote (Urban)	65.4088	0	0	0.001
Malawi (Rural) vs. Tibet (Rural)	Coyote (Rural) vs. Coyote (Urban)	2.36586	0.0181884	1	0.023
Malawi (Rural) vs. Tibet (Semi-Urban)	Coyote (Rural) vs. Coyote (Urban)	3.82667	0.000138381	1	0.001
Malawi (Rural) vs. Tibet (Urban)	Coyote (Rural) vs. Coyote (Urban)	9.61442	0	0	0.001
Malawi (Rural) vs. USA (Urban)	Coyote (Rural) vs. Coyote (Urban)	25.5144	0	0	0.001
Malawi (Rural) vs. Venezuela (Rural)	Coyote (Rural) vs. Coyote (Urban)	-11.5327	4.88819e-30	8.96299e-26	0.001
Malawi (Rural) vs. Yaounde (Urban)	Coyote (Rural) vs. Coyote (Urban)	3.55533	0.000385913	1	0.001
Maricao (Rural) (non-cristatellus)noncristatellus vs. Coyote (Rural)	Coyote (Rural) vs. Coyote (Urban)	51.6274	0	0	0.001
Maricao (Rural) (non-cristatellus)noncristatellus vs. Coyote (Urban)	Coyote (Rural) vs. Coyote (Urban)	22.669	0	0	0.001
Maricao (Rural) (non-cristatellus)noncristatellus vs. Malawi (Rural)	Coyote (Rural) vs. Coyote (Urban)	53.2846	0	0	0.001
Maricao (Rural) (non-cristatellus)noncristatellus vs. Maricao (Rural)	Coyote (Rural) vs. Coyote (Urban)	7.20343	9.07274e-13	1.66358e-08	0.001
Maricao (Rural) (non-cristatellus)noncristatellus vs. Maricao (Rural) (non-cristatellus)noncristatellus	Coyote (Rural) vs. Coyote (Urban)	2.70825	0.00688127	1	0.007
Maricao (Rural) (non-cristatellus)noncristatellus vs. Mayaguez (Urban)	Coyote (Rural) vs. Coyote (Urban)	8.17586	1.11022e-15	2.0357e-11	0.001
Maricao (Rural) (non-cristatellus)noncristatellus vs. Mbalmayo (Semi-Urban)	Coyote (Rural) vs. Coyote (Urban)	32.4068	0	0	0.001
Maricao (Rural) (non-cristatellus)noncristatellus vs. all	Coyote (Rural) vs. Coyote (Urban)	14.1988	0	0	0.001
Maricao (Rural) (non-cristatellus)noncristatellus vs. all	Coyote (Rural) vs. Coyote (Urban)	31.8395	0	0	0.001
Maricao (Rural) (non-cristatellus)noncristatellus vs. Sparrow (Rural)	Coyote (Rural) vs. Coyote (Urban)	34.9548	0	0	0.001
Maricao (Rural) (non-cristatellus)noncristatellus vs. Sparrow (Urban)	Coyote (Rural) vs. Coyote (Urban)	48.0119	0	0	0.001
Maricao (Rural) (non-cristatellus)noncristatellus vs. Tibet (Rural)	Coyote (Rural) vs. Coyote (Urban)	20.3755	0	0	0.001
Maricao (Rural) (non-cristatellus)noncristatellus vs. Tibet (Semi-Urban)	Coyote (Rural) vs. Coyote (Urban)	20.2013	0	0	0.001
Maricao (Rural) (non-cristatellus)noncristatellus vs. Tibet (Urban)	Coyote (Rural) vs. Coyote (Urban)	19.3708	0	0	0.001
Maricao (Rural) (non-cristatellus)noncristatellus vs. USA (Urban)	Coyote (Rural) vs. Coyote (Urban)	96.3463	0	0	0.001
Maricao (Rural) (non-cristatellus)noncristatellus vs. Venezuela (Rural)	Coyote (Rural) vs. Coyote (Urban)	43.9354	0	0	0.001
Maricao (Rural) (non-cristatellus)noncristatellus vs. Yaounde (Urban)	Coyote (Rural) vs. Coyote (Urban)	36.6576	0	0	0.001
Maricao (Rural) vs. Coyote (Rural)	Coyote (Rural) vs. Coyote (Urban)	53.8039	0	0	0.001
Maricao (Rural) vs. Coyote (Urban)	Coyote (Rural) vs. Coyote (Urban)	23.3692	0	0	0.001
Maricao (Rural) vs. Maricao (Rural)	Coyote (Rural) vs. Coyote (Urban)	2.74098	0.00622686	1	0.005
Maricao (Rural) vs. Mayaguez (Urban)	Coyote (Rural) vs. Coyote (Urban)	3.64059	0.000288297	1	0.001
Maricao (Rural) vs. Mbalmayo (Semi-Urban)	Coyote (Rural) vs. Coyote (Urban)	33.4644	0	0	0.001
Maricao (Rural) vs. all	Coyote (Rural) vs. Coyote (Urban)	14.6667	0	0	0.001
Maricao (Rural) vs. all	Coyote (Rural) vs. Coyote (Urban)	31.8149	0	0	0.001
Maricao (Rural) vs. Sparrow (Urban)	Coyote (Rural) vs. Coyote (Urban)	47.0923	0	0	0.001
Maricao (Rural) vs. Tibet (Rural)	Coyote (Rural) vs. Coyote (Urban)	21.2095	0	0	0.001
Maricao (Rural) vs. Tibet (Semi-Urban)	Coyote (Rural) vs. Coyote (Urban)	20.7829	0	0	0.001
Maricao (Rural) vs. Tibet (Urban)	Coyote (Rural) vs. Coyote (Urban)	19.9613	0	0	0.001
Maricao (Rural) vs. USA (Urban)	Coyote (Rural) vs. Coyote (Urban)	93.1596	0	0	0.001
Maricao (Rural) vs. Venezuela (Rural)	Coyote (Rural) vs. Coyote (Urban)	45.1262	0	0	0.001
Maricao (Rural) vs. Yaounde (Urban)	Coyote (Rural) vs. Coyote (Urban)	37.2775	0	0	0.001
Mayaguez (Urban) vs. Mayaguez (Urban)	Coyote (Rural) vs. Coyote (Urban)	0.798228	0.425075	1	0.438
Mbalmayo (Semi-Urban) vs. Mbalmayo (Semi-Urban)	Coyote (Rural) vs. Coyote (Urban)	-4.3648	1.45657e-05	0.267077	0.001
Ngoantet (Rural) vs. Coyote (Rural)	Coyote (Rural) vs. Coyote (Urban)	77.5954	0	0	0.001
Ngoantet (Rural) vs. Coyote (Urban)	Coyote (Rural) vs. Coyote (Urban)	30.4575	0	0	0.001
Ngoantet (Rural) vs. Malawi (Rural)	Coyote (Rural) vs. Coyote (Urban)	-6.50802	8.4043e-11	1.54101e-06	0.001
Ngoantet (Rural) vs. Maricao (Rural)	Coyote (Rural) vs. Coyote (Urban)	64.2324	0	0	0.001
Ngoantet (Rural) vs. Maricao (Rural) (non-cristatellus)noncristatellus	Coyote (Rural) vs. Coyote (Urban)	62.1989	0	0	0.001
Ngoantet (Rural) vs. Mayaguez (Urban)	Coyote (Rural) vs. Coyote (Urban)	34.4293	0	0	0.001
Ngoantet (Rural) vs. Mbalmayo (Semi-Urban)	Coyote (Rural) vs. Coyote (Urban)	-7.18773	9.03924e-13	1.65744e-08	0.001
Ngoantet (Rural) vs. all	Coyote (Rural) vs. Coyote (Urban)	-3.51848	0.000457613	1	0.002
Ngoantet (Rural) vs. all	Coyote (Rural) vs. Coyote (Urban)	25.0933	0	0	0.001
Ngoantet (Rural) vs. Ngoantet (Rural)	Coyote (Rural) vs. Coyote (Urban)	-6.73377	1.9228e-11	3.52564e-07	0.001
Ngoantet (Rural) vs. Sparrow (Rural)	Coyote (Rural) vs. Coyote (Urban)	55.3671	0	0	0.001
Ngoantet (Rural) vs. Sparrow (Urban)	Coyote (Rural) vs. Coyote (Urban)	78.6467	0	0	0.001
Ngoantet (Rural) vs. Tibet (Rural)	Coyote (Rural) vs. Coyote (Urban)	2.7747	0.0056153	1	0.007
Ngoantet (Rural) vs. Tibet (Semi-Urban)	Coyote (Rural) vs. Coyote (Urban)	3.98446	7.1919e-05	1	0.001
Ngoantet (Rural) vs. Tibet (Urban)	Coyote (Rural) vs. Coyote (Urban)	13.7955	0	0	0.001
Ngoantet (Rural) vs. USA (Urban)	Coyote (Rural) vs. Coyote (Urban)	43.9936	0	0	0.001
Ngoantet (Rural) vs. Venezuela (Rural)	Coyote (Rural) vs. Coyote (Urban)	1.6	0.109688	1	0.113
Ngoantet (Rural) vs. Yaounde (Urban)	Coyote (Rural) vs. Coyote (Urban)	3.11708	0.0018452	1	0.003
Sparrow (Rural) vs. Coyote (Rural)	Coyote (Rural) vs. Coyote (Urban)	44.8277	0	0	0.001
Sparrow (Rural) vs. Coyote (Urban)	Coyote (Rural) vs. Coyote (Urban)	19.7698	0	0	0.001
Sparrow (Rural) vs. Maricao (Rural)	Coyote (Rural) vs. Coyote (Urban)	36.065	0	0	0.001
Sparrow (Rural) vs. Mayaguez (Urban)	Coyote (Rural) vs. Coyote (Urban)	19.7131	0	0	0.001
Sparrow (Rural) vs. Mbalmayo (Semi-Urban)	Coyote (Rural) vs. Coyote (Urban)	28.682	0	0	0.001
Sparrow (Rural) vs. all	Coyote (Rural) vs. Coyote (Urban)	12.5298	0	0	0.001
Sparrow (Rural) vs. all	Coyote (Rural) vs. Coyote (Urban)	30.8094	0	0	0.001
Sparrow (Rural) vs. Sparrow (Rural)	Coyote (Rural) vs. Coyote (Urban)	4.89204	1.21524e-06	0.0222827	0.001
Sparrow (Rural) vs. Sparrow (Urban)	Coyote (Rural) vs. Coyote (Urban)	7.97636	2.88658e-15	5.29283e-11	0.001
Sparrow (Rural) vs. Tibet (Rural)	Coyote (Rural) vs. Coyote (Urban)	17.7738	0	0	0.001
Sparrow (Rural) vs. Tibet (Semi-Urban)	Coyote (Rural) vs. Coyote (Urban)	17.7591	0	0	0.001
Sparrow (Rural) vs. Tibet (Urban)	Coyote (Rural) vs. Coyote (Urban)	17.704	0	0	0.001
Sparrow (Rural) vs. USA (Urban)	Coyote (Rural) vs. Coyote (Urban)	94.6466	0	0	0.001
Sparrow (Rural) vs. Venezuela (Rural)	Coyote (Rural) vs. Coyote (Urban)	38.4013	0	0	0.001
Sparrow (Rural) vs. Yaounde (Urban)	Coyote (Rural) vs. Coyote (Urban)	33.6994	0	0	0.001
Sparrow (Urban) vs. Sparrow (Urban)	Coyote (Rural) vs. Coyote (Urban)	9.1726	0	0	0.001
Tibet (Rural) vs. Tibet (Rural)	Coyote (Rural) vs. Coyote (Urban)	-5.50819	5.59102e-08	0.00102517	0.001
Tibet (Semi-Urban) vs. Coyote (Rural)	Coyote (Rural) vs. Coyote (Urban)	25.5137	0	0	0.001
Tibet (Semi-Urban) vs. Coyote (Urban)	Coyote (Rural) vs. Coyote (Urban)	10.288	0	0	0.001
Tibet (Semi-Urban) vs. Mayaguez (Urban)	Coyote (Rural) vs. Coyote (Urban)	10.8491	0	0	0.001
Tibet (Semi-Urban) vs. Mbalmayo (Semi-Urban)	Coyote (Rural) vs. Coyote (Urban)	1.40987	0.159031	1	0.161
Tibet (Semi-Urban) vs. all	Coyote (Rural) vs. Coyote (Urban)	-0.861059	0.389581	1	0.399
Tibet (Semi-Urban) vs. all	Coyote (Rural) vs. Coyote (Urban)	5.62794	2.62617e-08	0.000481535	0.001
Tibet (Semi-Urban) vs. Sparrow (Urban)	Coyote (Rural) vs. Coyote (Urban)	25.3547	0	0	0.001
Tibet (Semi-Urban) vs. Tibet (Rural)	Coyote (Rural) vs. Coyote (Urban)	-1.1299	0.258986	1	0.259
Tibet (Semi-Urban) vs. Tibet (Semi-Urban)	Coyote (Rural) vs. Coyote (Urban)	0.237805	0.812122	1	0.821
Tibet (Semi-Urban) vs. Tibet (Urban)	Coyote (Rural) vs. Coyote (Urban)	2.67675	0.00764357	1	0.015
Tibet (Semi-Urban) vs. USA (Urban)	Coyote (Rural) vs. Coyote (Urban)	15.1359	0	0	0.001
Tibet (Semi-Urban) vs. Venezuela (Rural)	Coyote (Rural) vs. Coyote (Urban)	5.02476	6.18693e-07	0.0113444	0.001
Tibet (Semi-Urban) vs. Yaounde (Urban)	Coyote (Rural) vs. Coyote (Urban)	3.94216	8.83061e-05	1	0.001
Tibet (Urban) vs. Tibet (Urban)	Coyote (Rural) vs. Coyote (Urban)	1.4269	0.15418	1	0.156
USA (Urban) vs. Coyote (Rural)	Coyote (Rural) vs. Coyote (Urban)	112.449	0	0	0.001
USA (Urban) vs. Coyote (Urban)	Coyote (Rural) vs. Coyote (Urban)	52.7093	0	0	0.001
USA (Urban) vs. Mayaguez (Urban)	Coyote (Rural) vs. Coyote (Urban)	48.9783	0	0	0.001
USA (Urban) vs. Mbalmayo (Semi-Urban)	Coyote (Rural) vs. Coyote (Urban)	26.8235	0	0	0.001
USA (Urban) vs. all	Coyote (Rural) vs. Coyote (Urban)	23.1704	0	0	0.001
USA (Urban) vs. all	Coyote (Rural) vs. Coyote (Urban)	-1.89254	0.0584674	1	0.06
USA (Urban) vs. Sparrow (Urban)	Coyote (Rural) vs. Coyote (Urban)	133.841	0	0	0.001
USA (Urban) vs. Tibet (Rural)	Coyote (Rural) vs. Coyote (Urban)	29.7517	0	0	0.001
USA (Urban) vs. Tibet (Urban)	Coyote (Rural) vs. Coyote (Urban)	9.8462	0	0	0.001
USA (Urban) vs. USA (Urban)	Coyote (Rural) vs. Coyote (Urban)	-19.4593	9.39062e-84	1.72186e-79	0.001
USA (Urban) vs. Venezuela (Rural)	Coyote (Rural) vs. Coyote (Urban)	18.2267	0	0	0.001
Venezuela (Rural) vs. Venezuela (Rural)	Coyote (Rural) vs. Coyote (Urban)	-9.65616	2.61348e-21	4.79209e-17	0.001
Yaounde (Urban) vs. Coyote (Rural)	Coyote (Rural) vs. Coyote (Urban)	46.6195	0	0	0.001
Yaounde (Urban) vs. Coyote (Urban)	Coyote (Rural) vs. Coyote (Urban)	19.0939	0	0	0.001
Yaounde (Urban) vs. Mayaguez (Urban)	Coyote (Rural) vs. Coyote (Urban)	19.6961	0	0	0.001
Yaounde (Urban) vs. Mbalmayo (Semi-Urban)	Coyote (Rural) vs. Coyote (Urban)	-0.400606	0.688786	1	0.695
Yaounde (Urban) vs. all	Coyote (Rural) vs. Coyote (Urban)	2.42701	0.0155016	1	0.017
Yaounde (Urban) vs. all	Coyote (Rural) vs. Coyote (Urban)	8.86558	0	0	0.001
Yaounde (Urban) vs. Sparrow (Urban)	Coyote (Rural) vs. Coyote (Urban)	47.8155	0	0	0.001
Yaounde (Urban) vs. Tibet (Rural)	Coyote (Rural) vs. Coyote (Urban)	4.38998	1.29641e-05	0.23771	0.001
Yaounde (Urban) vs. Tibet (Urban)	Coyote (Rural) vs. Coyote (Urban)	6.43618	2.18466e-10	4.0058e-06	0.001
Yaounde (Urban) vs. USA (Urban)	Coyote (Rural) vs. Coyote (Urban)	17.7275	0	0	0.001
Yaounde (Urban) vs. Venezuela (Rural)	Coyote (Rural) vs. Coyote (Urban)	4.05724	5.20185e-05	0.953811	0.001
Yaounde (Urban) vs. Yaounde (Urban)	Coyote (Rural) vs. Coyote (Urban)	1.27728	0.201825	1	0.21
All between population	Coyote (Rural) vs. Mayaguez (Urban)	-14.623	2.11489e-48	3.87787e-44	0.001
All within population	Coyote (Rural) vs. Mayaguez (Urban)	-56.9467	0	0	0.001
Coyote (Rural) vs. Coyote (Rural)	Coyote (Rural) vs. Mayaguez (Urban)	-35.2349	2.1899e-208	4.0154e-204	0.001
Coyote (Rural) vs. Coyote (Urban)	Coyote (Rural) vs. Mayaguez (Urban)	-27.4828	2.19285e-125	4.02081e-121	0.001
Coyote (Rural) vs. Mbalmayo (Semi-Urban)	Coyote (Rural) vs. Mayaguez (Urban)	5.9473	3.33684e-09	6.11842e-05	0.001
Coyote (Rural) vs. Sparrow (Urban)	Coyote (Rural) vs. Mayaguez (Urban)	5.63875	1.87419e-08	0.000343651	0.001
Coyote (Rural) vs. Venezuela (Rural)	Coyote (Rural) vs. Mayaguez (Urban)	-3.80059	0.000147805	1	0.001
Coyote (Urban) vs. Coyote (Urban)	Coyote (Rural) vs. Mayaguez (Urban)	-22.1023	2.08654e-78	3.82588e-74	0.001
Malawi (Rural) vs. Coyote (Rural)	Coyote (Rural) vs. Mayaguez (Urban)	5.61043	2.1834e-08	0.000400349	0.001
Malawi (Rural) vs. Coyote (Urban)	Coyote (Rural) vs. Mayaguez (Urban)	-5.73353	1.28245e-08	0.000235151	0.001
Malawi (Rural) vs. Malawi (Rural)	Coyote (Rural) vs. Mayaguez (Urban)	-99.2399	0	0	0.001
Malawi (Rural) vs. Maricao (Rural)	Coyote (Rural) vs. Mayaguez (Urban)	15.1161	0	0	0.001
Malawi (Rural) vs. Mayaguez (Urban)	Coyote (Rural) vs. Mayaguez (Urban)	5.87522	5.65145e-09	0.000103625	0.001
Malawi (Rural) vs. Mbalmayo (Semi-Urban)	Coyote (Rural) vs. Mayaguez (Urban)	-70.0022	0	0	0.001
Malawi (Rural) vs. all	Coyote (Rural) vs. Mayaguez (Urban)	-51.5961	2.28917e-246	4.19743e-242	0.001
Malawi (Rural) vs. all	Coyote (Rural) vs. Mayaguez (Urban)	-41.8912	7.32448e-269	1.34302e-264	0.001
Malawi (Rural) vs. Sparrow (Rural)	Coyote (Rural) vs. Mayaguez (Urban)	13.5693	0	0	0.001
Malawi (Rural) vs. Sparrow (Urban)	Coyote (Rural) vs. Mayaguez (Urban)	18.5422	0	0	0.001
Malawi (Rural) vs. Tibet (Rural)	Coyote (Rural) vs. Mayaguez (Urban)	-62.3231	0	0	0.001
Malawi (Rural) vs. Tibet (Semi-Urban)	Coyote (Rural) vs. Mayaguez (Urban)	-43.9121	6.77242e-231	1.24179e-226	0.001
Malawi (Rural) vs. Tibet (Urban)	Coyote (Rural) vs. Mayaguez (Urban)	-48.4185	9.21453e-259	1.68958e-254	0.001
Malawi (Rural) vs. USA (Urban)	Coyote (Rural) vs. Mayaguez (Urban)	-49.3245	0	0	0.001
Malawi (Rural) vs. Venezuela (Rural)	Coyote (Rural) vs. Mayaguez (Urban)	-62.8617	0	0	0.001
Malawi (Rural) vs. Yaounde (Urban)	Coyote (Rural) vs. Mayaguez (Urban)	-54.4743	0	0	0.001
Maricao (Rural) (non-cristatellus)noncristatellus vs. Coyote (Rural)	Coyote (Rural) vs. Mayaguez (Urban)	12.179	0	0	0.001
Maricao (Rural) (non-cristatellus)noncristatellus vs. Coyote (Urban)	Coyote (Rural) vs. Mayaguez (Urban)	5.65538	2.14112e-08	0.000392597	0.001
Maricao (Rural) (non-cristatellus)noncristatellus vs. Malawi (Rural)	Coyote (Rural) vs. Mayaguez (Urban)	16.2183	0	0	0.001
Maricao (Rural) (non-cristatellus)noncristatellus vs. Maricao (Rural)	Coyote (Rural) vs. Mayaguez (Urban)	-41.0408	7.10346e-251	1.30249e-246	0.001
Maricao (Rural) (non-cristatellus)noncristatellus vs. Maricao (Rural) (non-cristatellus)noncristatellus	Coyote (Rural) vs. Mayaguez (Urban)	-39.9657	3.29002e-208	6.03259e-204	0.001
Maricao (Rural) (non-cristatellus)noncristatellus vs. Mayaguez (Urban)	Coyote (Rural) vs. Mayaguez (Urban)	-30.9256	3.35307e-140	6.14819e-136	0.001
Maricao (Rural) (non-cristatellus)noncristatellus vs. Mbalmayo (Semi-Urban)	Coyote (Rural) vs. Mayaguez (Urban)	5.90336	4.6621e-09	8.54843e-05	0.001
Maricao (Rural) (non-cristatellus)noncristatellus vs. all	Coyote (Rural) vs. Mayaguez (Urban)	2.90621	0.00378442	1	0.004
Maricao (Rural) (non-cristatellus)noncristatellus vs. all	Coyote (Rural) vs. Mayaguez (Urban)	-4.19158	2.96317e-05	0.543328	0.001
Maricao (Rural) (non-cristatellus)noncristatellus vs. Sparrow (Rural)	Coyote (Rural) vs. Mayaguez (Urban)	11.6349	0	0	0.001
Maricao (Rural) (non-cristatellus)noncristatellus vs. Sparrow (Urban)	Coyote (Rural) vs. Mayaguez (Urban)	7.69417	2.22045e-14	4.07141e-10	0.001
Maricao (Rural) (non-cristatellus)noncristatellus vs. Tibet (Rural)	Coyote (Rural) vs. Mayaguez (Urban)	5.63429	2.46995e-08	0.000452889	0.001
Maricao (Rural) (non-cristatellus)noncristatellus vs. Tibet (Semi-Urban)	Coyote (Rural) vs. Mayaguez (Urban)	4.71156	2.91911e-06	0.0535248	0.001
Maricao (Rural) (non-cristatellus)noncristatellus vs. Tibet (Urban)	Coyote (Rural) vs. Mayaguez (Urban)	0.503419	0.614814	1	0.611
Maricao (Rural) (non-cristatellus)noncristatellus vs. USA (Urban)	Coyote (Rural) vs. Mayaguez (Urban)	-0.354444	0.723016	1	0.736
Maricao (Rural) (non-cristatellus)noncristatellus vs. Venezuela (Rural)	Coyote (Rural) vs. Mayaguez (Urban)	9.5648	0	0	0.001
Maricao (Rural) (non-cristatellus)noncristatellus vs. Yaounde (Urban)	Coyote (Rural) vs. Mayaguez (Urban)	1.00043	0.317272	1	0.307
Maricao (Rural) vs. Coyote (Rural)	Coyote (Rural) vs. Mayaguez (Urban)	11.584	0	0	0.001
Maricao (Rural) vs. Coyote (Urban)	Coyote (Rural) vs. Mayaguez (Urban)	4.07195	5.0933e-05	0.933907	0.001
Maricao (Rural) vs. Maricao (Rural)	Coyote (Rural) vs. Mayaguez (Urban)	-39.6349	9.53339e-213	1.74804e-208	0.001
Maricao (Rural) vs. Mayaguez (Urban)	Coyote (Rural) vs. Mayaguez (Urban)	-35.694	9.06438e-172	1.66204e-167	0.001
Maricao (Rural) vs. Mbalmayo (Semi-Urban)	Coyote (Rural) vs. Mayaguez (Urban)	3.92269	9.24005e-05	1	0.001
Maricao (Rural) vs. all	Coyote (Rural) vs. Mayaguez (Urban)	1.98235	0.0478585	1	0.051
Maricao (Rural) vs. all	Coyote (Rural) vs. Mayaguez (Urban)	-8.20352	5.4382e-16	9.97148e-12	0.001
Maricao (Rural) vs. Sparrow (Urban)	Coyote (Rural) vs. Mayaguez (Urban)	2.51409	0.0120078	1	0.01
Maricao (Rural) vs. Tibet (Rural)	Coyote (Rural) vs. Mayaguez (Urban)	5.21187	2.38835e-07	0.00437928	0.001
Maricao (Rural) vs. Tibet (Semi-Urban)	Coyote (Rural) vs. Mayaguez (Urban)	3.02329	0.00258127	1	0.001
Maricao (Rural) vs. Tibet (Urban)	Coyote (Rural) vs. Mayaguez (Urban)	-1.03322	0.301816	1	0.298
Maricao (Rural) vs. USA (Urban)	Coyote (Rural) vs. Mayaguez (Urban)	-6.57457	5.1753e-11	9.48943e-07	0.001
Maricao (Rural) vs. Venezuela (Rural)	Coyote (Rural) vs. Mayaguez (Urban)	6.22454	5.98745e-10	1.09786e-05	0.001
Maricao (Rural) vs. Yaounde (Urban)	Coyote (Rural) vs. Mayaguez (Urban)	-2.44713	0.0145136	1	0.016
Mayaguez (Urban) vs. Mayaguez (Urban)	Coyote (Rural) vs. Mayaguez (Urban)	-27.3842	1.36161e-105	2.49665e-101	0.001
Mbalmayo (Semi-Urban) vs. Mbalmayo (Semi-Urban)	Coyote (Rural) vs. Mayaguez (Urban)	-56.029	3.29059e-266	6.03362e-262	0.001
Ngoantet (Rural) vs. Coyote (Rural)	Coyote (Rural) vs. Mayaguez (Urban)	6.90089	5.87463e-12	1.07717e-07	0.001
Ngoantet (Rural) vs. Coyote (Urban)	Coyote (Rural) vs. Mayaguez (Urban)	-5.04862	5.08375e-07	0.00932157	0.001
Ngoantet (Rural) vs. Malawi (Rural)	Coyote (Rural) vs. Mayaguez (Urban)	-62.9964	0	0	0.001
Ngoantet (Rural) vs. Maricao (Rural)	Coyote (Rural) vs. Mayaguez (Urban)	7.57816	4.57412e-14	8.3871e-10	0.001
Ngoantet (Rural) vs. Maricao (Rural) (non-cristatellus)noncristatellus	Coyote (Rural) vs. Mayaguez (Urban)	10.4484	0	0	0.001
Ngoantet (Rural) vs. Mayaguez (Urban)	Coyote (Rural) vs. Mayaguez (Urban)	1.98042	0.0478667	1	0.039
Ngoantet (Rural) vs. Mbalmayo (Semi-Urban)	Coyote (Rural) vs. Mayaguez (Urban)	-54.1181	0	0	0.001
Ngoantet (Rural) vs. all	Coyote (Rural) vs. Mayaguez (Urban)	-44.5188	3.97367e-222	7.28613e-218	0.001
Ngoantet (Rural) vs. all	Coyote (Rural) vs. Mayaguez (Urban)	-31.6719	3.96549e-184	7.27112e-180	0.001
Ngoantet (Rural) vs. Ngoantet (Rural)	Coyote (Rural) vs. Mayaguez (Urban)	-48.5074	0	0	0.001
Ngoantet (Rural) vs. Sparrow (Rural)	Coyote (Rural) vs. Mayaguez (Urban)	17.8987	0	0	0.001
Ngoantet (Rural) vs. Sparrow (Urban)	Coyote (Rural) vs. Mayaguez (Urban)	22.4237	0	0	0.001
Ngoantet (Rural) vs. Tibet (Rural)	Coyote (Rural) vs. Mayaguez (Urban)	-47.618	1.67592e-273	3.07297e-269	0.001
Ngoantet (Rural) vs. Tibet (Semi-Urban)	Coyote (Rural) vs. Mayaguez (Urban)	-36.0476	1.23612e-190	2.26655e-186	0.001
Ngoantet (Rural) vs. Tibet (Urban)	Coyote (Rural) vs. Mayaguez (Urban)	-38.8716	2.94158e-211	5.39368e-207	0.001
Ngoantet (Rural) vs. USA (Urban)	Coyote (Rural) vs. Mayaguez (Urban)	-35.4462	3.11115e-266	5.70461e-262	0.001
Ngoantet (Rural) vs. Venezuela (Rural)	Coyote (Rural) vs. Mayaguez (Urban)	-50.7028	0	0	0.001
Ngoantet (Rural) vs. Yaounde (Urban)	Coyote (Rural) vs. Mayaguez (Urban)	-44.8051	0	0	0.001
Sparrow (Rural) vs. Coyote (Rural)	Coyote (Rural) vs. Mayaguez (Urban)	12.2691	0	0	0.001
Sparrow (Rural) vs. Coyote (Urban)	Coyote (Rural) vs. Mayaguez (Urban)	6.22054	8.24063e-10	1.511e-05	0.001
Sparrow (Rural) vs. Maricao (Rural)	Coyote (Rural) vs. Mayaguez (Urban)	9.02646	0	0	0.001
Sparrow (Rural) vs. Mayaguez (Urban)	Coyote (Rural) vs. Mayaguez (Urban)	5.91992	4.90589e-09	8.99544e-05	0.001
Sparrow (Rural) vs. Mbalmayo (Semi-Urban)	Coyote (Rural) vs. Mayaguez (Urban)	9.14014	0	0	0.001
Sparrow (Rural) vs. all	Coyote (Rural) vs. Mayaguez (Urban)	4.09593	4.77218e-05	0.875027	0.001
Sparrow (Rural) vs. all	Coyote (Rural) vs. Mayaguez (Urban)	10.5492	0	0	0.001
Sparrow (Rural) vs. Sparrow (Rural)	Coyote (Rural) vs. Mayaguez (Urban)	-15.2908	2.68921e-46	4.93093e-42	0.001
Sparrow (Rural) vs. Sparrow (Urban)	Coyote (Rural) vs. Mayaguez (Urban)	-16.3719	8.11775e-56	1.48847e-51	0.001
Sparrow (Rural) vs. Tibet (Rural)	Coyote (Rural) vs. Mayaguez (Urban)	6.0604	2.21522e-09	4.06182e-05	0.001
Sparrow (Rural) vs. Tibet (Semi-Urban)	Coyote (Rural) vs. Mayaguez (Urban)	5.9819	3.51343e-09	6.44223e-05	0.001
Sparrow (Rural) vs. Tibet (Urban)	Coyote (Rural) vs. Mayaguez (Urban)	5.68816	1.88532e-08	0.000345691	0.001
Sparrow (Rural) vs. USA (Urban)	Coyote (Rural) vs. Mayaguez (Urban)	30.1536	0	0	0.001
Sparrow (Rural) vs. Venezuela (Rural)	Coyote (Rural) vs. Mayaguez (Urban)	11.204	0	0	0.001
Sparrow (Rural) vs. Yaounde (Urban)	Coyote (Rural) vs. Mayaguez (Urban)	10.6779	0	0	0.001
Sparrow (Urban) vs. Sparrow (Urban)	Coyote (Rural) vs. Mayaguez (Urban)	-17.1275	1.64874e-60	3.02314e-56	0.001
Tibet (Rural) vs. Tibet (Rural)	Coyote (Rural) vs. Mayaguez (Urban)	-41.1096	2.76446e-169	5.06891e-165	0.001
Tibet (Semi-Urban) vs. Coyote (Rural)	Coyote (Rural) vs. Mayaguez (Urban)	2.85738	0.00436636	1	0.007
Tibet (Semi-Urban) vs. Coyote (Urban)	Coyote (Rural) vs. Mayaguez (Urban)	-2.85945	0.00439172	1	0.004
Tibet (Semi-Urban) vs. Mayaguez (Urban)	Coyote (Rural) vs. Mayaguez (Urban)	-0.463818	0.642947	1	0.662
Tibet (Semi-Urban) vs. Mbalmayo (Semi-Urban)	Coyote (Rural) vs. Mayaguez (Urban)	-36.0596	1.6056e-160	2.94403e-156	0.001
Tibet (Semi-Urban) vs. all	Coyote (Rural) vs. Mayaguez (Urban)	-26.9549	1.23343e-102	2.26162e-98	0.001
Tibet (Semi-Urban) vs. all	Coyote (Rural) vs. Mayaguez (Urban)	-25.4724	3.60964e-102	6.61864e-98	0.001
Tibet (Semi-Urban) vs. Sparrow (Urban)	Coyote (Rural) vs. Mayaguez (Urban)	8.33638	2.22045e-16	4.07141e-12	0.001
Tibet (Semi-Urban) vs. Tibet (Rural)	Coyote (Rural) vs. Mayaguez (Urban)	-34.5002	7.52067e-143	1.37899e-138	0.001
Tibet (Semi-Urban) vs. Tibet (Semi-Urban)	Coyote (Rural) vs. Mayaguez (Urban)	-25.2226	1.19644e-93	2.19379e-89	0.001
Tibet (Semi-Urban) vs. Tibet (Urban)	Coyote (Rural) vs. Mayaguez (Urban)	-23.9814	6.62226e-89	1.21426e-84	0.001
Tibet (Semi-Urban) vs. USA (Urban)	Coyote (Rural) vs. Mayaguez (Urban)	-32.4874	1.90455e-191	3.49218e-187	0.001
Tibet (Semi-Urban) vs. Venezuela (Rural)	Coyote (Rural) vs. Mayaguez (Urban)	-38.9389	8.65391e-189	1.58678e-184	0.001
Tibet (Semi-Urban) vs. Yaounde (Urban)	Coyote (Rural) vs. Mayaguez (Urban)	-36.7683	5.33783e-170	9.78745e-166	0.001
Tibet (Urban) vs. Tibet (Urban)	Coyote (Rural) vs. Mayaguez (Urban)	-20.1396	7.11672e-68	1.30492e-63	0.001
USA (Urban) vs. Coyote (Rural)	Coyote (Rural) vs. Mayaguez (Urban)	-0.197875	0.843146	1	0.853
USA (Urban) vs. Coyote (Urban)	Coyote (Rural) vs. Mayaguez (Urban)	-4.52326	6.34307e-06	0.116306	0.001
USA (Urban) vs. Mayaguez (Urban)	Coyote (Rural) vs. Mayaguez (Urban)	-11.6097	1.81597e-30	3.32976e-26	0.001
USA (Urban) vs. Mbalmayo (Semi-Urban)	Coyote (Rural) vs. Mayaguez (Urban)	-37.8006	4.20107e-277	7.70308e-273	0.001
USA (Urban) vs. all	Coyote (Rural) vs. Mayaguez (Urban)	-28.2389	8.53073e-140	1.56419e-135	0.001
USA (Urban) vs. all	Coyote (Rural) vs. Mayaguez (Urban)	-62.6801	0	0	0.001
USA (Urban) vs. Sparrow (Urban)	Coyote (Rural) vs. Mayaguez (Urban)	34.3806	0	0	0.001
USA (Urban) vs. Tibet (Rural)	Coyote (Rural) vs. Mayaguez (Urban)	-31.5531	2.11133e-182	3.87133e-178	0.001
USA (Urban) vs. Tibet (Urban)	Coyote (Rural) vs. Mayaguez (Urban)	-51.7837	0	0	0.001
USA (Urban) vs. USA (Urban)	Coyote (Rural) vs. Mayaguez (Urban)	-70.7173	0	0	0.001
USA (Urban) vs. Venezuela (Rural)	Coyote (Rural) vs. Mayaguez (Urban)	-44.8496	0	0	0.001
Venezuela (Rural) vs. Venezuela (Rural)	Coyote (Rural) vs. Mayaguez (Urban)	-58.743	0	0	0.001
Yaounde (Urban) vs. Coyote (Rural)	Coyote (Rural) vs. Mayaguez (Urban)	0.267517	0.789098	1	0.797
Yaounde (Urban) vs. Coyote (Urban)	Coyote (Rural) vs. Mayaguez (Urban)	-5.40492	8.53919e-08	0.00156575	0.001
Yaounde (Urban) vs. Mayaguez (Urban)	Coyote (Rural) vs. Mayaguez (Urban)	-4.41209	1.16251e-05	0.213158	0.001
Yaounde (Urban) vs. Mbalmayo (Semi-Urban)	Coyote (Rural) vs. Mayaguez (Urban)	-48.5721	1.26037e-278	2.31102e-274	0.001
Yaounde (Urban) vs. all	Coyote (Rural) vs. Mayaguez (Urban)	-27.5802	1.24975e-110	2.29154e-106	0.001
Yaounde (Urban) vs. all	Coyote (Rural) vs. Mayaguez (Urban)	-39.4539	9.16198e-220	1.67994e-215	0.001
Yaounde (Urban) vs. Sparrow (Urban)	Coyote (Rural) vs. Mayaguez (Urban)	13.1937	0	0	0.001
Yaounde (Urban) vs. Tibet (Rural)	Coyote (Rural) vs. Mayaguez (Urban)	-35.8299	1.25264e-164	2.29684e-160	0.001
Yaounde (Urban) vs. Tibet (Urban)	Coyote (Rural) vs. Mayaguez (Urban)	-42.4048	2.24963e-201	4.12493e-197	0.001
Yaounde (Urban) vs. USA (Urban)	Coyote (Rural) vs. Mayaguez (Urban)	-44.4903	0	0	0.001
Yaounde (Urban) vs. Venezuela (Rural)	Coyote (Rural) vs. Mayaguez (Urban)	-50.1508	0	0	0.001
Yaounde (Urban) vs. Yaounde (Urban)	Coyote (Rural) vs. Mayaguez (Urban)	-49.7214	2.0344e-263	3.73028e-259	0.001
All between population	Coyote (Rural) vs. Mbalmayo (Semi-Urban)	-23.4073	5.10176e-121	9.3546e-117	0.001
All within population	Coyote (Rural) vs. Mbalmayo (Semi-Urban)	-84.5252	0	0	0.001
Coyote (Rural) vs. Coyote (Rural)	Coyote (Rural) vs. Mbalmayo (Semi-Urban)	-52.7544	0	0	0.001
Coyote (Rural) vs. Coyote (Urban)	Coyote (Rural) vs. Mbalmayo (Semi-Urban)	-41.6004	1.81096e-257	3.32058e-253	0.001
Coyote (Urban) vs. Coyote (Urban)	Coyote (Rural) vs. Mbalmayo (Semi-Urban)	-36.7365	2.5793e-195	4.7294e-191	0.001
Malawi (Rural) vs. Coyote (Rural)	Coyote (Rural) vs. Mbalmayo (Semi-Urban)	-2.69052	0.00716445	1	0.01
Malawi (Rural) vs. Coyote (Urban)	Coyote (Rural) vs. Mbalmayo (Semi-Urban)	-12.03	5.35581e-32	9.82042e-28	0.001
Malawi (Rural) vs. Malawi (Rural)	Coyote (Rural) vs. Mbalmayo (Semi-Urban)	-149.627	0	0	0.001
Malawi (Rural) vs. Maricao (Rural)	Coyote (Rural) vs. Mbalmayo (Semi-Urban)	16.0303	0	0	0.001
Malawi (Rural) vs. Mayaguez (Urban)	Coyote (Rural) vs. Mbalmayo (Semi-Urban)	3.09367	0.00201057	1	0.003
Malawi (Rural) vs. Mbalmayo (Semi-Urban)	Coyote (Rural) vs. Mbalmayo (Semi-Urban)	-106.897	0	0	0.001
Malawi (Rural) vs. all	Coyote (Rural) vs. Mbalmayo (Semi-Urban)	-84.2174	0	0	0.001
Malawi (Rural) vs. all	Coyote (Rural) vs. Mbalmayo (Semi-Urban)	-69.4275	0	0	0.001
Malawi (Rural) vs. Sparrow (Rural)	Coyote (Rural) vs. Mbalmayo (Semi-Urban)	15.9942	0	0	0.001
Malawi (Rural) vs. Sparrow (Urban)	Coyote (Rural) vs. Mbalmayo (Semi-Urban)	20.3419	0	0	0.001
Malawi (Rural) vs. Tibet (Rural)	Coyote (Rural) vs. Mbalmayo (Semi-Urban)	-103.331	0	0	0.001
Malawi (Rural) vs. Tibet (Semi-Urban)	Coyote (Rural) vs. Mbalmayo (Semi-Urban)	-69.8332	0	0	0.001
Malawi (Rural) vs. Tibet (Urban)	Coyote (Rural) vs. Mbalmayo (Semi-Urban)	-84.6286	0	0	0.001
Malawi (Rural) vs. USA (Urban)	Coyote (Rural) vs. Mbalmayo (Semi-Urban)	-75.4007	0	0	0.001
Malawi (Rural) vs. Venezuela (Rural)	Coyote (Rural) vs. Mbalmayo (Semi-Urban)	-94.1564	0	0	0.001
Malawi (Rural) vs. Yaounde (Urban)	Coyote (Rural) vs. Mbalmayo (Semi-Urban)	-83.2933	0	0	0.001
Maricao (Rural) (non-cristatellus)noncristatellus vs. Coyote (Rural)	Coyote (Rural) vs. Mbalmayo (Semi-Urban)	10.7992	0	0	0.001
Maricao (Rural) (non-cristatellus)noncristatellus vs. Coyote (Urban)	Coyote (Rural) vs. Mbalmayo (Semi-Urban)	5.23478	1.90365e-07	0.00349053	0.001
Maricao (Rural) (non-cristatellus)noncristatellus vs. Malawi (Rural)	Coyote (Rural) vs. Mbalmayo (Semi-Urban)	20.0398	0	0	0.001
Maricao (Rural) (non-cristatellus)noncristatellus vs. Maricao (Rural)	Coyote (Rural) vs. Mbalmayo (Semi-Urban)	-63.3024	0	0	0.001
Maricao (Rural) (non-cristatellus)noncristatellus vs. Maricao (Rural) (non-cristatellus)noncristatellus	Coyote (Rural) vs. Mbalmayo (Semi-Urban)	-62.3078	0	0	0.001
Maricao (Rural) (non-cristatellus)noncristatellus vs. Mayaguez (Urban)	Coyote (Rural) vs. Mbalmayo (Semi-Urban)	-50.9884	1.917e-321	3.514965e-317	0.001
Maricao (Rural) (non-cristatellus)noncristatellus vs. Mbalmayo (Semi-Urban)	Coyote (Rural) vs. Mbalmayo (Semi-Urban)	2.25997	0.0239462	1	0.028
Maricao (Rural) (non-cristatellus)noncristatellus vs. all	Coyote (Rural) vs. Mbalmayo (Semi-Urban)	1.63197	0.102946	1	0.079
Maricao (Rural) (non-cristatellus)noncristatellus vs. all	Coyote (Rural) vs. Mbalmayo (Semi-Urban)	-14.9083	1.57217e-47	2.88273e-43	0.001
Maricao (Rural) (non-cristatellus)noncristatellus vs. Sparrow (Rural)	Coyote (Rural) vs. Mbalmayo (Semi-Urban)	15.9489	0	0	0.001
Maricao (Rural) (non-cristatellus)noncristatellus vs. Sparrow (Urban)	Coyote (Rural) vs. Mbalmayo (Semi-Urban)	4.00981	6.2516e-05	1	0.001
Maricao (Rural) (non-cristatellus)noncristatellus vs. Tibet (Rural)	Coyote (Rural) vs. Mbalmayo (Semi-Urban)	6.19582	7.70417e-10	1.41264e-05	0.001
Maricao (Rural) (non-cristatellus)noncristatellus vs. Tibet (Semi-Urban)	Coyote (Rural) vs. Mbalmayo (Semi-Urban)	3.84155	0.000127986	1	0.001
Maricao (Rural) (non-cristatellus)noncristatellus vs. Tibet (Urban)	Coyote (Rural) vs. Mbalmayo (Semi-Urban)	-6.07857	1.57883e-09	2.89494e-05	0.001
Maricao (Rural) (non-cristatellus)noncristatellus vs. USA (Urban)	Coyote (Rural) vs. Mbalmayo (Semi-Urban)	-12.5907	5.12946e-36	9.40538e-32	0.001
Maricao (Rural) (non-cristatellus)noncristatellus vs. Venezuela (Rural)	Coyote (Rural) vs. Mbalmayo (Semi-Urban)	7.02088	2.90168e-12	5.32052e-08	0.001
Maricao (Rural) (non-cristatellus)noncristatellus vs. Yaounde (Urban)	Coyote (Rural) vs. Mbalmayo (Semi-Urban)	-7.67208	2.63168e-14	4.82546e-10	0.001
Maricao (Rural) vs. Coyote (Rural)	Coyote (Rural) vs. Mbalmayo (Semi-Urban)	8.71602	0	0	0.001
Maricao (Rural) vs. Coyote (Urban)	Coyote (Rural) vs. Mbalmayo (Semi-Urban)	1.38807	0.165333	1	0.157
Maricao (Rural) vs. Maricao (Rural)	Coyote (Rural) vs. Mbalmayo (Semi-Urban)	-61.31	0	0	0.001
Maricao (Rural) vs. Mayaguez (Urban)	Coyote (Rural) vs. Mbalmayo (Semi-Urban)	-56.3761	0	0	0.001
Maricao (Rural) vs. Mbalmayo (Semi-Urban)	Coyote (Rural) vs. Mbalmayo (Semi-Urban)	-2.31283	0.0208441	1	0.017
Maricao (Rural) vs. all	Coyote (Rural) vs. Mbalmayo (Semi-Urban)	-0.934937	0.350005	1	0.368
Maricao (Rural) vs. all	Coyote (Rural) vs. Mbalmayo (Semi-Urban)	-20.4852	1.88024e-84	3.44761e-80	0.001
Maricao (Rural) vs. Sparrow (Urban)	Coyote (Rural) vs. Mbalmayo (Semi-Urban)	-2.03318	0.042132	1	0.034
Maricao (Rural) vs. Tibet (Rural)	Coyote (Rural) vs. Mbalmayo (Semi-Urban)	4.72186	2.57818e-06	0.0472735	0.001
Maricao (Rural) vs. Tibet (Semi-Urban)	Coyote (Rural) vs. Mbalmayo (Semi-Urban)	-0.478044	0.632696	1	0.628
Maricao (Rural) vs. Tibet (Urban)	Coyote (Rural) vs. Mbalmayo (Semi-Urban)	-9.67774	1.80743e-21	3.3141e-17	0.001
Maricao (Rural) vs. USA (Urban)	Coyote (Rural) vs. Mbalmayo (Semi-Urban)	-19.5123	4.73664e-83	8.6851e-79	0.001
Maricao (Rural) vs. Venezuela (Rural)	Coyote (Rural) vs. Mbalmayo (Semi-Urban)	0.552215	0.580853	1	0.63
Maricao (Rural) vs. Yaounde (Urban)	Coyote (Rural) vs. Mbalmayo (Semi-Urban)	-12.8864	1.30728e-36	2.39704e-32	0.001
Mayaguez (Urban) vs. Mayaguez (Urban)	Coyote (Rural) vs. Mbalmayo (Semi-Urban)	-50.4872	1.90908e-292	3.50049e-288	0.001
Mbalmayo (Semi-Urban) vs. Mbalmayo (Semi-Urban)	Coyote (Rural) vs. Mbalmayo (Semi-Urban)	-90.5636	0	0	0.001
Ngoantet (Rural) vs. Coyote (Rural)	Coyote (Rural) vs. Mbalmayo (Semi-Urban)	-0.870119	0.384276	1	0.414
Ngoantet (Rural) vs. Coyote (Urban)	Coyote (Rural) vs. Mbalmayo (Semi-Urban)	-12.2877	1.97797e-33	3.62681e-29	0.001
Ngoantet (Rural) vs. Malawi (Rural)	Coyote (Rural) vs. Mbalmayo (Semi-Urban)	-94.3827	0	0	0.001
Ngoantet (Rural) vs. Maricao (Rural)	Coyote (Rural) vs. Mbalmayo (Semi-Urban)	-0.744443	0.456655	1	0.479
Ngoantet (Rural) vs. Maricao (Rural) (non-cristatellus)noncristatellus	Coyote (Rural) vs. Mbalmayo (Semi-Urban)	4.48967	7.36278e-06	0.135004	0.001
Ngoantet (Rural) vs. Mayaguez (Urban)	Coyote (Rural) vs. Mbalmayo (Semi-Urban)	-5.52478	3.76153e-08	0.000689713	0.001
Ngoantet (Rural) vs. Mbalmayo (Semi-Urban)	Coyote (Rural) vs. Mbalmayo (Semi-Urban)	-81.2875	0	0	0.001
Ngoantet (Rural) vs. all	Coyote (Rural) vs. Mbalmayo (Semi-Urban)	-68.8743	0	0	0.001
Ngoantet (Rural) vs. all	Coyote (Rural) vs. Mbalmayo (Semi-Urban)	-50.5501	0	0	0.001
Ngoantet (Rural) vs. Ngoantet (Rural)	Coyote (Rural) vs. Mbalmayo (Semi-Urban)	-72.4921	0	0	0.001
Ngoantet (Rural) vs. Sparrow (Rural)	Coyote (Rural) vs. Mbalmayo (Semi-Urban)	23.7078	0	0	0.001
Ngoantet (Rural) vs. Sparrow (Urban)	Coyote (Rural) vs. Mbalmayo (Semi-Urban)	24.759	0	0	0.001
Ngoantet (Rural) vs. Tibet (Rural)	Coyote (Rural) vs. Mbalmayo (Semi-Urban)	-74.2647	0	0	0.001
Ngoantet (Rural) vs. Tibet (Semi-Urban)	Coyote (Rural) vs. Mbalmayo (Semi-Urban)	-55.5732	0	0	0.001
Ngoantet (Rural) vs. Tibet (Urban)	Coyote (Rural) vs. Mbalmayo (Semi-Urban)	-64.6928	0	0	0.001
Ngoantet (Rural) vs. USA (Urban)	Coyote (Rural) vs. Mbalmayo (Semi-Urban)	-55.4445	0	0	0.001
Ngoantet (Rural) vs. Venezuela (Rural)	Coyote (Rural) vs. Mbalmayo (Semi-Urban)	-76.4888	0	0	0.001
Ngoantet (Rural) vs. Yaounde (Urban)	Coyote (Rural) vs. Mbalmayo (Semi-Urban)	-67.7628	0	0	0.001
Sparrow (Rural) vs. Coyote (Rural)	Coyote (Rural) vs. Mbalmayo (Semi-Urban)	12.7757	0	0	0.001
Sparrow (Rural) vs. Coyote (Urban)	Coyote (Rural) vs. Mbalmayo (Semi-Urban)	8.06061	1.55431e-15	2.84999e-11	0.001
Sparrow (Rural) vs. Maricao (Rural)	Coyote (Rural) vs. Mbalmayo (Semi-Urban)	8.47457	0	0	0.001
Sparrow (Rural) vs. Mayaguez (Urban)	Coyote (Rural) vs. Mbalmayo (Semi-Urban)	7.27691	5.84199e-13	1.07119e-08	0.001
Sparrow (Rural) vs. Mbalmayo (Semi-Urban)	Coyote (Rural) vs. Mbalmayo (Semi-Urban)	12.0022	0	0	0.001
Sparrow (Rural) vs. all	Coyote (Rural) vs. Mbalmayo (Semi-Urban)	5.53701	3.78845e-08	0.000694651	0.001
Sparrow (Rural) vs. all	Coyote (Rural) vs. Mbalmayo (Semi-Urban)	14.8947	0	0	0.001
Sparrow (Rural) vs. Sparrow (Rural)	Coyote (Rural) vs. Mbalmayo (Semi-Urban)	-23.6132	2.15593e-103	3.95311e-99	0.001
Sparrow (Rural) vs. Sparrow (Urban)	Coyote (Rural) vs. Mbalmayo (Semi-Urban)	-25.04	8.88084e-122	1.62839e-117	0.001
Sparrow (Rural) vs. Tibet (Rural)	Coyote (Rural) vs. Mbalmayo (Semi-Urban)	8.53125	0	0	0.001
Sparrow (Rural) vs. Tibet (Semi-Urban)	Coyote (Rural) vs. Mbalmayo (Semi-Urban)	8.32426	2.22045e-16	4.07141e-12	0.001
Sparrow (Rural) vs. Tibet (Urban)	Coyote (Rural) vs. Mbalmayo (Semi-Urban)	7.55032	8.23785e-14	1.51049e-09	0.001
Sparrow (Rural) vs. USA (Urban)	Coyote (Rural) vs. Mbalmayo (Semi-Urban)	38.5179	0	0	0.001
Sparrow (Rural) vs. Venezuela (Rural)	Coyote (Rural) vs. Mbalmayo (Semi-Urban)	13.0648	0	0	0.001
Sparrow (Rural) vs. Yaounde (Urban)	Coyote (Rural) vs. Mbalmayo (Semi-Urban)	13.916	0	0	0.001
Sparrow (Urban) vs. Sparrow (Urban)	Coyote (Rural) vs. Mbalmayo (Semi-Urban)	-26.2817	2.07107e-132	3.79752e-128	0.001
Tibet (Rural) vs. Tibet (Rural)	Coyote (Rural) vs. Mbalmayo (Semi-Urban)	-71.6113	0	0	0.001
Tibet (Semi-Urban) vs. Coyote (Rural)	Coyote (Rural) vs. Mbalmayo (Semi-Urban)	-2.17816	0.0295492	1	0.039
Tibet (Semi-Urban) vs. Coyote (Urban)	Coyote (Rural) vs. Mbalmayo (Semi-Urban)	-9.42997	2.12544e-20	3.89721e-16	0.001
Tibet (Semi-Urban) vs. Mayaguez (Urban)	Coyote (Rural) vs. Mbalmayo (Semi-Urban)	-5.22409	2.07043e-07	0.00379634	0.001
Tibet (Semi-Urban) vs. Mbalmayo (Semi-Urban)	Coyote (Rural) vs. Mbalmayo (Semi-Urban)	-58.8616	0	0	0.001
Tibet (Semi-Urban) vs. all	Coyote (Rural) vs. Mbalmayo (Semi-Urban)	-47.8154	5.68839e-273	1.04302e-268	0.001
Tibet (Semi-Urban) vs. all	Coyote (Rural) vs. Mbalmayo (Semi-Urban)	-41.6242	2.75761e-240	5.05636e-236	0.001
Tibet (Semi-Urban) vs. Sparrow (Urban)	Coyote (Rural) vs. Mbalmayo (Semi-Urban)	11.3045	0	0	0.001
Tibet (Semi-Urban) vs. Tibet (Rural)	Coyote (Rural) vs. Mbalmayo (Semi-Urban)	-59.1683	0	0	0.001
Tibet (Semi-Urban) vs. Tibet (Semi-Urban)	Coyote (Rural) vs. Mbalmayo (Semi-Urban)	-48.8761	8.5062e-280	1.5597e-275	0.001
Tibet (Semi-Urban) vs. Tibet (Urban)	Coyote (Rural) vs. Mbalmayo (Semi-Urban)	-42.9242	2.31018e-241	4.23594e-237	0.001
Tibet (Semi-Urban) vs. USA (Urban)	Coyote (Rural) vs. Mbalmayo (Semi-Urban)	-50.2257	0	0	0.001
Tibet (Semi-Urban) vs. Venezuela (Rural)	Coyote (Rural) vs. Mbalmayo (Semi-Urban)	-63.6529	0	0	0.001
Tibet (Semi-Urban) vs. Yaounde (Urban)	Coyote (Rural) vs. Mbalmayo (Semi-Urban)	-60.4858	0	0	0.001
Tibet (Urban) vs. Tibet (Urban)	Coyote (Rural) vs. Mbalmayo (Semi-Urban)	-39.0493	4.33948e-211	7.95688e-207	0.001
USA (Urban) vs. Coyote (Rural)	Coyote (Rural) vs. Mbalmayo (Semi-Urban)	-9.753	2.13887e-22	3.92182e-18	0.001
USA (Urban) vs. Coyote (Urban)	Coyote (Rural) vs. Mbalmayo (Semi-Urban)	-13.6469	2.58833e-41	4.74596e-37	0.001
USA (Urban) vs. Mayaguez (Urban)	Coyote (Rural) vs. Mbalmayo (Semi-Urban)	-24.0323	6.28841e-118	1.15304e-113	0.001
USA (Urban) vs. Mbalmayo (Semi-Urban)	Coyote (Rural) vs. Mbalmayo (Semi-Urban)	-58.6605	0	0	0.001
USA (Urban) vs. all	Coyote (Rural) vs. Mbalmayo (Semi-Urban)	-48.1677	0	0	0.001
USA (Urban) vs. all	Coyote (Rural) vs. Mbalmayo (Semi-Urban)	-94.1229	0	0	0.001
USA (Urban) vs. Sparrow (Urban)	Coyote (Rural) vs. Mbalmayo (Semi-Urban)	33.4984	0	0	0.001
USA (Urban) vs. Tibet (Rural)	Coyote (Rural) vs. Mbalmayo (Semi-Urban)	-51.758	0	0	0.001
USA (Urban) vs. Tibet (Urban)	Coyote (Rural) vs. Mbalmayo (Semi-Urban)	-79.8141	0	0	0.001
USA (Urban) vs. USA (Urban)	Coyote (Rural) vs. Mbalmayo (Semi-Urban)	-104.89	0	0	0.001
USA (Urban) vs. Venezuela (Rural)	Coyote (Rural) vs. Mbalmayo (Semi-Urban)	-68.2943	0	0	0.001
Venezuela (Rural) vs. Venezuela (Rural)	Coyote (Rural) vs. Mbalmayo (Semi-Urban)	-89.0542	0	0	0.001
Yaounde (Urban) vs. Coyote (Rural)	Coyote (Rural) vs. Mbalmayo (Semi-Urban)	-8.53678	2.31091e-17	4.23728e-13	0.001
Yaounde (Urban) vs. Coyote (Urban)	Coyote (Rural) vs. Mbalmayo (Semi-Urban)	-14.1019	2.74346e-42	5.0304e-38	0.001
Yaounde (Urban) vs. Mayaguez (Urban)	Coyote (Rural) vs. Mbalmayo (Semi-Urban)	-14.4528	3.41588e-44	6.26336e-40	0.001
Yaounde (Urban) vs. Mbalmayo (Semi-Urban)	Coyote (Rural) vs. Mbalmayo (Semi-Urban)	-74.9487	0	0	0.001
Yaounde (Urban) vs. all	Coyote (Rural) vs. Mbalmayo (Semi-Urban)	-45.5074	4.85948e-264	8.91035e-260	0.001
Yaounde (Urban) vs. all	Coyote (Rural) vs. Mbalmayo (Semi-Urban)	-62.264	0	0	0.001
Yaounde (Urban) vs. Sparrow (Urban)	Coyote (Rural) vs. Mbalmayo (Semi-Urban)	14.2624	0	0	0.001
Yaounde (Urban) vs. Tibet (Rural)	Coyote (Rural) vs. Mbalmayo (Semi-Urban)	-59.0982	0	0	0.001
Yaounde (Urban) vs. Tibet (Urban)	Coyote (Rural) vs. Mbalmayo (Semi-Urban)	-77.2538	0	0	0.001
Yaounde (Urban) vs. USA (Urban)	Coyote (Rural) vs. Mbalmayo (Semi-Urban)	-67.8471	0	0	0.001
Yaounde (Urban) vs. Venezuela (Rural)	Coyote (Rural) vs. Mbalmayo (Semi-Urban)	-77.1969	0	0	0.001
Yaounde (Urban) vs. Yaounde (Urban)	Coyote (Rural) vs. Mbalmayo (Semi-Urban)	-79.0638	0	0	0.001
All between population	Coyote (Rural) vs. all	-24.2689	6.24353e-130	1.14481e-125	0.001
All within population	Coyote (Rural) vs. all	-89.6756	0	0	0.001
Coyote (Rural) vs. Coyote (Rural)	Coyote (Rural) vs. all	-55.7845	0	0	0.001
Coyote (Rural) vs. Coyote (Urban)	Coyote (Rural) vs. all	-43.8086	2.12762e-284	3.90121e-280	0.001
Coyote (Rural) vs. Mayaguez (Urban)	Coyote (Rural) vs. all	-3.90863	9.63251e-05	1	0.001
Coyote (Rural) vs. Mbalmayo (Semi-Urban)	Coyote (Rural) vs. all	3.50183	0.000470739	1	0.001
Coyote (Rural) vs. Sparrow (Urban)	Coyote (Rural) vs. all	3.77384	0.000163278	1	0.001
Coyote (Rural) vs. Venezuela (Rural)	Coyote (Rural) vs. all	-10.4813	2.67515e-25	4.90516e-21	0.001
Coyote (Urban) vs. Coyote (Urban)	Coyote (Rural) vs. all	-37.0602	2.30137e-205	4.21979e-201	0.001
Malawi (Rural) vs. Coyote (Rural)	Coyote (Rural) vs. all	1.23235	0.21789	1	0.223
Malawi (Rural) vs. Coyote (Urban)	Coyote (Rural) vs. all	-11.4416	2.64495e-29	4.84977e-25	0.001
Malawi (Rural) vs. Malawi (Rural)	Coyote (Rural) vs. all	-157.57	0	0	0.001
Malawi (Rural) vs. Maricao (Rural)	Coyote (Rural) vs. all	18.0842	0	0	0.001
Malawi (Rural) vs. Mayaguez (Urban)	Coyote (Rural) vs. all	5.32038	1.16607e-07	0.0021381	0.001
Malawi (Rural) vs. Mbalmayo (Semi-Urban)	Coyote (Rural) vs. all	-112.049	0	0	0.001
Malawi (Rural) vs. all	Coyote (Rural) vs. all	-85.6368	0	0	0.001
Malawi (Rural) vs. all	Coyote (Rural) vs. all	-70.5662	0	0	0.001
Malawi (Rural) vs. Sparrow (Rural)	Coyote (Rural) vs. all	17.0866	0	0	0.001
Malawi (Rural) vs. Sparrow (Urban)	Coyote (Rural) vs. all	22.7754	0	0	0.001
Malawi (Rural) vs. Tibet (Rural)	Coyote (Rural) vs. all	-104.382	0	0	0.001
Malawi (Rural) vs. Tibet (Semi-Urban)	Coyote (Rural) vs. all	-71.9816	0	0	0.001
Malawi (Rural) vs. Tibet (Urban)	Coyote (Rural) vs. all	-83.5387	0	0	0.001
Malawi (Rural) vs. USA (Urban)	Coyote (Rural) vs. all	-79.23	0	0	0.001
Malawi (Rural) vs. Venezuela (Rural)	Coyote (Rural) vs. all	-99.5051	0	0	0.001
Malawi (Rural) vs. Yaounde (Urban)	Coyote (Rural) vs. all	-87.3477	0	0	0.001
Maricao (Rural) (non-cristatellus)noncristatellus vs. Coyote (Rural)	Coyote (Rural) vs. all	13.7209	0	0	0.001
Maricao (Rural) (non-cristatellus)noncristatellus vs. Coyote (Urban)	Coyote (Rural) vs. all	6.36974	2.48724e-10	4.5606e-06	0.001
Maricao (Rural) (non-cristatellus)noncristatellus vs. Malawi (Rural)	Coyote (Rural) vs. all	20.7651	0	0	0.001
Maricao (Rural) (non-cristatellus)noncristatellus vs. Maricao (Rural)	Coyote (Rural) vs. all	-66.1799	0	0	0.001
Maricao (Rural) (non-cristatellus)noncristatellus vs. Maricao (Rural) (non-cristatellus)noncristatellus	Coyote (Rural) vs. all	-64.7917	0	0	0.001
Maricao (Rural) (non-cristatellus)noncristatellus vs. Mayaguez (Urban)	Coyote (Rural) vs. all	-51.8	0	0	0.001
Maricao (Rural) (non-cristatellus)noncristatellus vs. Mbalmayo (Semi-Urban)	Coyote (Rural) vs. all	4.86689	1.22741e-06	0.0225058	0.001
Maricao (Rural) (non-cristatellus)noncristatellus vs. all	Coyote (Rural) vs. all	2.68547	0.00733018	1	0.004
Maricao (Rural) (non-cristatellus)noncristatellus vs. all	Coyote (Rural) vs. all	-12.0596	2.25551e-32	4.1357e-28	0.001
Maricao (Rural) (non-cristatellus)noncristatellus vs. Sparrow (Rural)	Coyote (Rural) vs. all	15.6494	0	0	0.001
Maricao (Rural) (non-cristatellus)noncristatellus vs. Sparrow (Urban)	Coyote (Rural) vs. all	6.85884	8.57203e-12	1.57177e-07	0.001
Maricao (Rural) (non-cristatellus)noncristatellus vs. Tibet (Rural)	Coyote (Rural) vs. all	6.80225	1.48535e-11	2.72353e-07	0.001
Maricao (Rural) (non-cristatellus)noncristatellus vs. Tibet (Semi-Urban)	Coyote (Rural) vs. all	4.99431	6.59847e-07	0.0120989	0.001
Maricao (Rural) (non-cristatellus)noncristatellus vs. Tibet (Urban)	Coyote (Rural) vs. all	-3.06984	0.00218032	1	0.002
Maricao (Rural) (non-cristatellus)noncristatellus vs. USA (Urban)	Coyote (Rural) vs. all	-9.05588	1.66432e-19	3.05169e-15	0.001
Maricao (Rural) (non-cristatellus)noncristatellus vs. Venezuela (Rural)	Coyote (Rural) vs. all	9.81323	0	0	0.001
Maricao (Rural) (non-cristatellus)noncristatellus vs. Yaounde (Urban)	Coyote (Rural) vs. all	-4.24686	2.26044e-05	0.414474	0.001
Maricao (Rural) vs. Coyote (Rural)	Coyote (Rural) vs. all	12.0525	0	0	0.001
Maricao (Rural) vs. Coyote (Urban)	Coyote (Rural) vs. all	3.2453	0.00119773	1	0.002
Maricao (Rural) vs. Maricao (Rural)	Coyote (Rural) vs. all	-63.9761	0	0	0.001
Maricao (Rural) vs. Mayaguez (Urban)	Coyote (Rural) vs. all	-58.3023	0	0	0.001
Maricao (Rural) vs. Mbalmayo (Semi-Urban)	Coyote (Rural) vs. all	0.998327	0.318244	1	0.323
Maricao (Rural) vs. all	Coyote (Rural) vs. all	0.740147	0.459337	1	0.452
Maricao (Rural) vs. all	Coyote (Rural) vs. all	-18.2067	8.39003e-69	1.5384e-64	0.001
Maricao (Rural) vs. Sparrow (Urban)	Coyote (Rural) vs. all	-0.13355	0.893768	1	0.886
Maricao (Rural) vs. Tibet (Rural)	Coyote (Rural) vs. all	5.76972	9.60748e-09	0.000176163	0.001
Maricao (Rural) vs. Tibet (Semi-Urban)	Coyote (Rural) vs. all	1.58879	0.112317	1	0.12
Maricao (Rural) vs. Tibet (Urban)	Coyote (Rural) vs. all	-6.09956	1.34708e-09	2.47001e-05	0.001
Maricao (Rural) vs. USA (Urban)	Coyote (Rural) vs. all	-17.2669	9.50939e-66	1.74364e-61	0.001
Maricao (Rural) vs. Venezuela (Rural)	Coyote (Rural) vs. all	3.89503	0.000100722	1	0.001
Maricao (Rural) vs. Yaounde (Urban)	Coyote (Rural) vs. all	-9.77018	4.1643e-22	7.63565e-18	0.001
Mayaguez (Urban) vs. Mayaguez (Urban)	Coyote (Rural) vs. all	-48.3236	8.33153e-292	1.52767e-287	0.001
Mbalmayo (Semi-Urban) vs. Mbalmayo (Semi-Urban)	Coyote (Rural) vs. all	-92.4697	0	0	0.001
Ngoantet (Rural) vs. Coyote (Rural)	Coyote (Rural) vs. all	3.04046	0.00237373	1	0.001
Ngoantet (Rural) vs. Coyote (Urban)	Coyote (Rural) vs. all	-11.2224	2.13797e-28	3.92018e-24	0.001
Ngoantet (Rural) vs. Malawi (Rural)	Coyote (Rural) vs. all	-99.7745	0	0	0.001
Ngoantet (Rural) vs. Maricao (Rural)	Coyote (Rural) vs. all	3.75452	0.000176207	1	0.002
Ngoantet (Rural) vs. Maricao (Rural) (non-cristatellus)noncristatellus	Coyote (Rural) vs. all	8.77419	0	0	0.001
Ngoantet (Rural) vs. Mayaguez (Urban)	Coyote (Rural) vs. all	-2.27618	0.0229389	1	0.029
Ngoantet (Rural) vs. Mbalmayo (Semi-Urban)	Coyote (Rural) vs. all	-85.8219	0	0	0.001
Ngoantet (Rural) vs. all	Coyote (Rural) vs. all	-71.7847	0	0	0.001
Ngoantet (Rural) vs. all	Coyote (Rural) vs. all	-52.2766	0	0	0.001
Ngoantet (Rural) vs. Ngoantet (Rural)	Coyote (Rural) vs. all	-76.7079	0	0	0.001
Ngoantet (Rural) vs. Sparrow (Rural)	Coyote (Rural) vs. all	23.696	0	0	0.001
Ngoantet (Rural) vs. Sparrow (Urban)	Coyote (Rural) vs. all	27.6354	0	0	0.001
Ngoantet (Rural) vs. Tibet (Rural)	Coyote (Rural) vs. all	-77.2032	0	0	0.001
Ngoantet (Rural) vs. Tibet (Semi-Urban)	Coyote (Rural) vs. all	-58.092	0	0	0.001
Ngoantet (Rural) vs. Tibet (Urban)	Coyote (Rural) vs. all	-65.5033	0	0	0.001
Ngoantet (Rural) vs. USA (Urban)	Coyote (Rural) vs. all	-57.8594	0	0	0.001
Ngoantet (Rural) vs. Venezuela (Rural)	Coyote (Rural) vs. all	-80.6674	0	0	0.001
Ngoantet (Rural) vs. Yaounde (Urban)	Coyote (Rural) vs. all	-71.4003	0	0	0.001
Sparrow (Rural) vs. Coyote (Rural)	Coyote (Rural) vs. all	14.8235	0	0	0.001
Sparrow (Rural) vs. Coyote (Urban)	Coyote (Rural) vs. all	8.12536	8.88178e-16	1.62856e-11	0.001
Sparrow (Rural) vs. Maricao (Rural)	Coyote (Rural) vs. all	10.4173	0	0	0.001
Sparrow (Rural) vs. Mayaguez (Urban)	Coyote (Rural) vs. all	7.52922	8.83738e-14	1.62042e-09	0.001
Sparrow (Rural) vs. Mbalmayo (Semi-Urban)	Coyote (Rural) vs. all	12.0192	0	0	0.001
Sparrow (Rural) vs. all	Coyote (Rural) vs. all	5.46347	5.56183e-08	0.00101982	0.001
Sparrow (Rural) vs. all	Coyote (Rural) vs. all	14.396	0	0	0.001
Sparrow (Rural) vs. Sparrow (Rural)	Coyote (Rural) vs. all	-24.6988	2.79035e-113	5.11638e-109	0.001
Sparrow (Rural) vs. Sparrow (Urban)	Coyote (Rural) vs. all	-26.3064	9.54724e-134	1.75058e-129	0.001
Sparrow (Rural) vs. Tibet (Rural)	Coyote (Rural) vs. all	8.25689	2.22045e-16	4.07141e-12	0.001
Sparrow (Rural) vs. Tibet (Semi-Urban)	Coyote (Rural) vs. all	8.10073	1.11022e-15	2.0357e-11	0.001
Sparrow (Rural) vs. Tibet (Urban)	Coyote (Rural) vs. all	7.51667	9.85878e-14	1.80771e-09	0.001
Sparrow (Rural) vs. USA (Urban)	Coyote (Rural) vs. all	39.5305	0	0	0.001
Sparrow (Rural) vs. Venezuela (Rural)	Coyote (Rural) vs. all	13.9901	0	0	0.001
Sparrow (Rural) vs. Yaounde (Urban)	Coyote (Rural) vs. all	13.9946	0	0	0.001
Sparrow (Urban) vs. Sparrow (Urban)	Coyote (Rural) vs. all	-27.5794	4.09237e-145	7.50376e-141	0.001
Tibet (Rural) vs. Tibet (Rural)	Coyote (Rural) vs. all	-70.358	0	0	0.001
Tibet (Semi-Urban) vs. Coyote (Rural)	Coyote (Rural) vs. all	0.459228	0.64613	1	0.626
Tibet (Semi-Urban) vs. Coyote (Urban)	Coyote (Rural) vs. all	-7.32185	4.22781e-13	7.75212e-09	0.001
Tibet (Semi-Urban) vs. Mayaguez (Urban)	Coyote (Rural) vs. all	-3.18779	0.00146714	1	0.006
Tibet (Semi-Urban) vs. Mbalmayo (Semi-Urban)	Coyote (Rural) vs. all	-59.9156	0	0	0.001
Tibet (Semi-Urban) vs. all	Coyote (Rural) vs. all	-46.6417	3.78428e-278	6.93886e-274	0.001
Tibet (Semi-Urban) vs. all	Coyote (Rural) vs. all	-42.4418	7.3033e-256	1.33913e-251	0.001
Tibet (Semi-Urban) vs. Sparrow (Urban)	Coyote (Rural) vs. all	11.146	0	0	0.001
Tibet (Semi-Urban) vs. Tibet (Rural)	Coyote (Rural) vs. all	-58.724	0	0	0.001
Tibet (Semi-Urban) vs. Tibet (Semi-Urban)	Coyote (Rural) vs. all	-45.4949	3.20566e-269	5.87789e-265	0.001
Tibet (Semi-Urban) vs. Tibet (Urban)	Coyote (Rural) vs. all	-41.8078	2.11561e-243	3.87918e-239	0.001
Tibet (Semi-Urban) vs. USA (Urban)	Coyote (Rural) vs. all	-52.5325	0	0	0.001
Tibet (Semi-Urban) vs. Venezuela (Rural)	Coyote (Rural) vs. all	-64.8176	0	0	0.001
Tibet (Semi-Urban) vs. Yaounde (Urban)	Coyote (Rural) vs. all	-61.3959	0	0	0.001
Tibet (Urban) vs. Tibet (Urban)	Coyote (Rural) vs. all	-36.4052	1.66236e-199	3.0481e-195	0.001
USA (Urban) vs. Coyote (Rural)	Coyote (Rural) vs. all	-7.11802	1.15188e-12	2.11209e-08	0.001
USA (Urban) vs. Coyote (Urban)	Coyote (Rural) vs. all	-11.955	2.55424e-32	4.68345e-28	0.001
USA (Urban) vs. Mayaguez (Urban)	Coyote (Rural) vs. all	-22.9622	7.4066e-109	1.35807e-104	0.001
USA (Urban) vs. Mbalmayo (Semi-Urban)	Coyote (Rural) vs. all	-61.3158	0	0	0.001
USA (Urban) vs. all	Coyote (Rural) vs. all	-48.4754	0	0	0.001
USA (Urban) vs. all	Coyote (Rural) vs. all	-99.4343	0	0	0.001
USA (Urban) vs. Sparrow (Urban)	Coyote (Rural) vs. all	40.5627	0	0	0.001
USA (Urban) vs. Tibet (Rural)	Coyote (Rural) vs. all	-52.9851	0	0	0.001
USA (Urban) vs. Tibet (Urban)	Coyote (Rural) vs. all	-83.4714	0	0	0.001
USA (Urban) vs. USA (Urban)	Coyote (Rural) vs. all	-111.301	0	0	0.001
USA (Urban) vs. Venezuela (Rural)	Coyote (Rural) vs. all	-71.849	0	0	0.001
Venezuela (Rural) vs. Venezuela (Rural)	Coyote (Rural) vs. all	-93.6119	0	0	0.001
Yaounde (Urban) vs. Coyote (Rural)	Coyote (Rural) vs. all	-5.57976	2.64296e-08	0.000484613	0.001
Yaounde (Urban) vs. Coyote (Urban)	Coyote (Rural) vs. all	-12.2451	5.81426e-33	1.0661e-28	0.001
Yaounde (Urban) vs. Mayaguez (Urban)	Coyote (Rural) vs. all	-11.5061	1.90264e-29	3.48868e-25	0.001
Yaounde (Urban) vs. Mbalmayo (Semi-Urban)	Coyote (Rural) vs. all	-78.2474	0	0	0.001
Yaounde (Urban) vs. all	Coyote (Rural) vs. all	-46.1191	1.7379e-280	3.18662e-276	0.001
Yaounde (Urban) vs. all	Coyote (Rural) vs. all	-64.4748	0	0	0.001
Yaounde (Urban) vs. Sparrow (Urban)	Coyote (Rural) vs. all	15.9101	0	0	0.001
Yaounde (Urban) vs. Tibet (Rural)	Coyote (Rural) vs. all	-59.9248	0	0	0.001
Yaounde (Urban) vs. Tibet (Urban)	Coyote (Rural) vs. all	-74.6164	0	0	0.001
Yaounde (Urban) vs. USA (Urban)	Coyote (Rural) vs. all	-71.3347	0	0	0.001
Yaounde (Urban) vs. Venezuela (Rural)	Coyote (Rural) vs. all	-80.7281	0	0	0.001
Yaounde (Urban) vs. Yaounde (Urban)	Coyote (Rural) vs. all	-81.4486	0	0	0.001
All between population	Coyote (Rural) vs. Sparrow (Urban)	-35.5339	9.15514e-276	1.67869e-271	0.001
All within population	Coyote (Rural) vs. Sparrow (Urban)	-126.686	0	0	0.001
Coyote (Rural) vs. Coyote (Rural)	Coyote (Rural) vs. Sparrow (Urban)	-77.326	0	0	0.001
Coyote (Rural) vs. Coyote (Urban)	Coyote (Rural) vs. Sparrow (Urban)	-59.4167	0	0	0.001
Coyote (Rural) vs. Mbalmayo (Semi-Urban)	Coyote (Rural) vs. Sparrow (Urban)	-1.22775	0.219621	1	0.224
Coyote (Urban) vs. Coyote (Urban)	Coyote (Rural) vs. Sparrow (Urban)	-38.7706	1.28136e-257	2.34951e-253	0.001
Malawi (Rural) vs. Coyote (Rural)	Coyote (Rural) vs. Sparrow (Urban)	-4.11253	3.97335e-05	0.728554	0.001
Malawi (Rural) vs. Coyote (Urban)	Coyote (Rural) vs. Sparrow (Urban)	-14.6725	4.08187e-47	7.48453e-43	0.001
Malawi (Rural) vs. Malawi (Rural)	Coyote (Rural) vs. Sparrow (Urban)	-206.001	0	0	0.001
Malawi (Rural) vs. Maricao (Rural)	Coyote (Rural) vs. Sparrow (Urban)	6.31885	2.90409e-10	5.32494e-06	0.001
Malawi (Rural) vs. Mayaguez (Urban)	Coyote (Rural) vs. Sparrow (Urban)	0.672512	0.50131	1	0.501
Malawi (Rural) vs. Mbalmayo (Semi-Urban)	Coyote (Rural) vs. Sparrow (Urban)	-144.461	0	0	0.001
Malawi (Rural) vs. all	Coyote (Rural) vs. Sparrow (Urban)	-92.3344	0	0	0.001
Malawi (Rural) vs. all	Coyote (Rural) vs. Sparrow (Urban)	-83.0004	0	0	0.001
Malawi (Rural) vs. Sparrow (Rural)	Coyote (Rural) vs. Sparrow (Urban)	6.51953	8.01077e-11	1.46885e-06	0.001
Malawi (Rural) vs. Sparrow (Urban)	Coyote (Rural) vs. Sparrow (Urban)	9.05393	0	0	0.001
Malawi (Rural) vs. Tibet (Rural)	Coyote (Rural) vs. Sparrow (Urban)	-110.403	0	0	0.001
Malawi (Rural) vs. Tibet (Semi-Urban)	Coyote (Rural) vs. Sparrow (Urban)	-85.2282	0	0	0.001
Malawi (Rural) vs. Tibet (Urban)	Coyote (Rural) vs. Sparrow (Urban)	-82.4504	0	0	0.001
Malawi (Rural) vs. USA (Urban)	Coyote (Rural) vs. Sparrow (Urban)	-111.629	0	0	0.001
Malawi (Rural) vs. Venezuela (Rural)	Coyote (Rural) vs. Sparrow (Urban)	-135.905	0	0	0.001
Malawi (Rural) vs. Yaounde (Urban)	Coyote (Rural) vs. Sparrow (Urban)	-115.614	0	0	0.001
Maricao (Rural) (non-cristatellus)noncristatellus vs. Coyote (Rural)	Coyote (Rural) vs. Sparrow (Urban)	6.14427	8.80671e-10	1.6148e-05	0.001
Maricao (Rural) (non-cristatellus)noncristatellus vs. Coyote (Urban)	Coyote (Rural) vs. Sparrow (Urban)	2.00601	0.0449525	1	0.044
Maricao (Rural) (non-cristatellus)noncristatellus vs. Malawi (Rural)	Coyote (Rural) vs. Sparrow (Urban)	7.81401	7.10543e-15	1.30285e-10	0.001
Maricao (Rural) (non-cristatellus)noncristatellus vs. Maricao (Rural)	Coyote (Rural) vs. Sparrow (Urban)	-86.9294	0	0	0.001
Maricao (Rural) (non-cristatellus)noncristatellus vs. Maricao (Rural) (non-cristatellus)noncristatellus	Coyote (Rural) vs. Sparrow (Urban)	-80.7996	0	0	0.001
Maricao (Rural) (non-cristatellus)noncristatellus vs. Mayaguez (Urban)	Coyote (Rural) vs. Sparrow (Urban)	-58.333	0	0	0.001
Maricao (Rural) (non-cristatellus)noncristatellus vs. Mbalmayo (Semi-Urban)	Coyote (Rural) vs. Sparrow (Urban)	0.230723	0.817545	1	0.812
Maricao (Rural) (non-cristatellus)noncristatellus vs. all	Coyote (Rural) vs. Sparrow (Urban)	0.329777	0.741595	1	0.767
Maricao (Rural) (non-cristatellus)noncristatellus vs. all	Coyote (Rural) vs. Sparrow (Urban)	-12.8781	4.93947e-37	9.05702e-33	0.001
Maricao (Rural) (non-cristatellus)noncristatellus vs. Sparrow (Rural)	Coyote (Rural) vs. Sparrow (Urban)	6.2329	5.18688e-10	9.51065e-06	0.001
Maricao (Rural) (non-cristatellus)noncristatellus vs. Sparrow (Urban)	Coyote (Rural) vs. Sparrow (Urban)	2.07084	0.0384394	1	0.041
Maricao (Rural) (non-cristatellus)noncristatellus vs. Tibet (Rural)	Coyote (Rural) vs. Sparrow (Urban)	2.27071	0.0232432	1	0.021
Maricao (Rural) (non-cristatellus)noncristatellus vs. Tibet (Semi-Urban)	Coyote (Rural) vs. Sparrow (Urban)	1.23009	0.21877	1	0.215
Maricao (Rural) (non-cristatellus)noncristatellus vs. Tibet (Urban)	Coyote (Rural) vs. Sparrow (Urban)	-3.74672	0.00018293	1	0.002
Maricao (Rural) (non-cristatellus)noncristatellus vs. USA (Urban)	Coyote (Rural) vs. Sparrow (Urban)	-16.6164	3.84213e-61	7.04493e-57	0.001
Maricao (Rural) (non-cristatellus)noncristatellus vs. Venezuela (Rural)	Coyote (Rural) vs. Sparrow (Urban)	2.8142	0.00491625	1	0.009
Maricao (Rural) (non-cristatellus)noncristatellus vs. Yaounde (Urban)	Coyote (Rural) vs. Sparrow (Urban)	-6.4567	1.22488e-10	2.24594e-06	0.001
Maricao (Rural) vs. Coyote (Rural)	Coyote (Rural) vs. Sparrow (Urban)	4.13941	3.55017e-05	0.65096	0.001
Maricao (Rural) vs. Coyote (Urban)	Coyote (Rural) vs. Sparrow (Urban)	0.0976352	0.922229	1	0.922
Maricao (Rural) vs. Maricao (Rural)	Coyote (Rural) vs. Sparrow (Urban)	-81.714	0	0	0.001
Maricao (Rural) vs. Mayaguez (Urban)	Coyote (Rural) vs. Sparrow (Urban)	-70.5694	0	0	0.001
Maricao (Rural) vs. Mbalmayo (Semi-Urban)	Coyote (Rural) vs. Sparrow (Urban)	-2.33248	0.0197378	1	0.021
Maricao (Rural) vs. all	Coyote (Rural) vs. Sparrow (Urban)	-0.895181	0.370774	1	0.385
Maricao (Rural) vs. all	Coyote (Rural) vs. Sparrow (Urban)	-19.3857	2.54316e-79	4.66313e-75	0.001
Maricao (Rural) vs. Sparrow (Urban)	Coyote (Rural) vs. Sparrow (Urban)	-3.3591	0.000789218	1	0.002
Maricao (Rural) vs. Tibet (Rural)	Coyote (Rural) vs. Sparrow (Urban)	1.59268	0.111348	1	0.098
Maricao (Rural) vs. Tibet (Semi-Urban)	Coyote (Rural) vs. Sparrow (Urban)	-0.876948	0.380592	1	0.378
Maricao (Rural) vs. Tibet (Urban)	Coyote (Rural) vs. Sparrow (Urban)	-5.82129	6.52516e-09	0.000119645	0.001
Maricao (Rural) vs. USA (Urban)	Coyote (Rural) vs. Sparrow (Urban)	-26.5371	4.20593e-150	7.71199e-146	0.001
Maricao (Rural) vs. Venezuela (Rural)	Coyote (Rural) vs. Sparrow (Urban)	-0.907295	0.364309	1	0.385
Maricao (Rural) vs. Yaounde (Urban)	Coyote (Rural) vs. Sparrow (Urban)	-11.3803	1.76183e-29	3.2305e-25	0.001
Mayaguez (Urban) vs. Mayaguez (Urban)	Coyote (Rural) vs. Sparrow (Urban)	-42.0705	1.3686e-292	2.50946e-288	0.001
Mbalmayo (Semi-Urban) vs. Mbalmayo (Semi-Urban)	Coyote (Rural) vs. Sparrow (Urban)	-101.074	0	0	0.001
Ngoantet (Rural) vs. Coyote (Rural)	Coyote (Rural) vs. Sparrow (Urban)	-2.80343	0.00507122	1	0.006
Ngoantet (Rural) vs. Coyote (Urban)	Coyote (Rural) vs. Sparrow (Urban)	-14.3685	2.00909e-45	3.68387e-41	0.001
Ngoantet (Rural) vs. Malawi (Rural)	Coyote (Rural) vs. Sparrow (Urban)	-138.186	0	0	0.001
Ngoantet (Rural) vs. Maricao (Rural)	Coyote (Rural) vs. Sparrow (Urban)	-2.37168	0.0177445	1	0.018
Ngoantet (Rural) vs. Maricao (Rural) (non-cristatellus)noncristatellus	Coyote (Rural) vs. Sparrow (Urban)	1.3606	0.173703	1	0.158
Ngoantet (Rural) vs. Mayaguez (Urban)	Coyote (Rural) vs. Sparrow (Urban)	-4.72143	2.44178e-06	0.0447726	0.001
Ngoantet (Rural) vs. Mbalmayo (Semi-Urban)	Coyote (Rural) vs. Sparrow (Urban)	-116.964	0	0	0.001
Ngoantet (Rural) vs. all	Coyote (Rural) vs. Sparrow (Urban)	-88.8622	0	0	0.001
Ngoantet (Rural) vs. all	Coyote (Rural) vs. Sparrow (Urban)	-69.0624	0	0	0.001
Ngoantet (Rural) vs. Ngoantet (Rural)	Coyote (Rural) vs. Sparrow (Urban)	-106.765	0	0	0.001
Ngoantet (Rural) vs. Sparrow (Rural)	Coyote (Rural) vs. Sparrow (Urban)	9.30713	0	0	0.001
Ngoantet (Rural) vs. Sparrow (Urban)	Coyote (Rural) vs. Sparrow (Urban)	11.0608	0	0	0.001
Ngoantet (Rural) vs. Tibet (Rural)	Coyote (Rural) vs. Sparrow (Urban)	-95.9589	0	0	0.001
Ngoantet (Rural) vs. Tibet (Semi-Urban)	Coyote (Rural) vs. Sparrow (Urban)	-75.5687	0	0	0.001
Ngoantet (Rural) vs. Tibet (Urban)	Coyote (Rural) vs. Sparrow (Urban)	-73.5808	0	0	0.001
Ngoantet (Rural) vs. USA (Urban)	Coyote (Rural) vs. Sparrow (Urban)	-82.6652	0	0	0.001
Ngoantet (Rural) vs. Venezuela (Rural)	Coyote (Rural) vs. Sparrow (Urban)	-111.225	0	0	0.001
Ngoantet (Rural) vs. Yaounde (Urban)	Coyote (Rural) vs. Sparrow (Urban)	-98.1595	0	0	0.001
Sparrow (Rural) vs. Coyote (Rural)	Coyote (Rural) vs. Sparrow (Urban)	6.30645	3.19767e-10	5.86325e-06	0.001
Sparrow (Rural) vs. Coyote (Urban)	Coyote (Rural) vs. Sparrow (Urban)	3.08591	0.00205011	1	0.004
Sparrow (Rural) vs. Maricao (Rural)	Coyote (Rural) vs. Sparrow (Urban)	4.44927	8.90787e-06	0.163335	0.001
Sparrow (Rural) vs. Mayaguez (Urban)	Coyote (Rural) vs. Sparrow (Urban)	2.73412	0.00629589	1	0.016
Sparrow (Rural) vs. Mbalmayo (Semi-Urban)	Coyote (Rural) vs. Sparrow (Urban)	4.61579	4.08471e-06	0.0748972	0.001
Sparrow (Rural) vs. all	Coyote (Rural) vs. Sparrow (Urban)	2.1341	0.0329307	1	0.036
Sparrow (Rural) vs. all	Coyote (Rural) vs. Sparrow (Urban)	5.8272	6.23632e-09	0.000114349	0.001
Sparrow (Rural) vs. Sparrow (Rural)	Coyote (Rural) vs. Sparrow (Urban)	-33.1308	3.22269e-202	5.90912e-198	0.001
Sparrow (Rural) vs. Sparrow (Urban)	Coyote (Rural) vs. Sparrow (Urban)	-36.9247	1.35853e-252	2.491e-248	0.001
Sparrow (Rural) vs. Tibet (Rural)	Coyote (Rural) vs. Sparrow (Urban)	3.3299	0.000880764	1	0.008
Sparrow (Rural) vs. Tibet (Semi-Urban)	Coyote (Rural) vs. Sparrow (Urban)	3.23849	0.00121661	1	0.005
Sparrow (Rural) vs. Tibet (Urban)	Coyote (Rural) vs. Sparrow (Urban)	2.89688	0.00380017	1	0.005
Sparrow (Rural) vs. USA (Urban)	Coyote (Rural) vs. Sparrow (Urban)	16.021	0	0	0.001
Sparrow (Rural) vs. Venezuela (Rural)	Coyote (Rural) vs. Sparrow (Urban)	5.15845	2.63617e-07	0.00483369	0.001
Sparrow (Rural) vs. Yaounde (Urban)	Coyote (Rural) vs. Sparrow (Urban)	5.36193	8.83626e-08	0.00162022	0.001
Sparrow (Urban) vs. Sparrow (Urban)	Coyote (Rural) vs. Sparrow (Urban)	-38.5991	3.73844e-272	6.8548e-268	0.001
Tibet (Rural) vs. Tibet (Rural)	Coyote (Rural) vs. Sparrow (Urban)	-64.7202	0	0	0.001
Tibet (Semi-Urban) vs. Coyote (Rural)	Coyote (Rural) vs. Sparrow (Urban)	-1.99513	0.0461236	1	0.047
Tibet (Semi-Urban) vs. Coyote (Urban)	Coyote (Rural) vs. Sparrow (Urban)	-6.10356	1.19733e-09	2.19542e-05	0.001
Tibet (Semi-Urban) vs. Mayaguez (Urban)	Coyote (Rural) vs. Sparrow (Urban)	-3.0445	0.00235473	1	0.013
Tibet (Semi-Urban) vs. Mbalmayo (Semi-Urban)	Coyote (Rural) vs. Sparrow (Urban)	-65.7484	0	0	0.001
Tibet (Semi-Urban) vs. all	Coyote (Rural) vs. Sparrow (Urban)	-42.5928	8.11966e-298	1.48882e-293	0.001
Tibet (Semi-Urban) vs. all	Coyote (Rural) vs. Sparrow (Urban)	-48.3538	0	0	0.001
Tibet (Semi-Urban) vs. Sparrow (Urban)	Coyote (Rural) vs. Sparrow (Urban)	4.39031	1.17358e-05	0.215188	0.001
Tibet (Semi-Urban) vs. Tibet (Rural)	Coyote (Rural) vs. Sparrow (Urban)	-57	0	0	0.001
Tibet (Semi-Urban) vs. Tibet (Semi-Urban)	Coyote (Rural) vs. Sparrow (Urban)	-36.781	1.45958e-236	2.67628e-232	0.001
Tibet (Semi-Urban) vs. Tibet (Urban)	Coyote (Rural) vs. Sparrow (Urban)	-38.8666	5.02799e-259	9.21932e-255	0.001
Tibet (Semi-Urban) vs. USA (Urban)	Coyote (Rural) vs. Sparrow (Urban)	-71.5836	0	0	0.001
Tibet (Semi-Urban) vs. Venezuela (Rural)	Coyote (Rural) vs. Sparrow (Urban)	-72.3129	0	0	0.001
Tibet (Semi-Urban) vs. Yaounde (Urban)	Coyote (Rural) vs. Sparrow (Urban)	-67.1848	0	0	0.001
Tibet (Urban) vs. Tibet (Urban)	Coyote (Rural) vs. Sparrow (Urban)	-29.8092	4.68706e-167	8.59418e-163	0.001
USA (Urban) vs. Coyote (Rural)	Coyote (Rural) vs. Sparrow (Urban)	-15.0114	1.50069e-50	2.75167e-46	0.001
USA (Urban) vs. Coyote (Urban)	Coyote (Rural) vs. Sparrow (Urban)	-17.0558	2.41472e-63	4.42762e-59	0.001
USA (Urban) vs. Mayaguez (Urban)	Coyote (Rural) vs. Sparrow (Urban)	-29.8317	2.63726e-179	4.83568e-175	0.001
USA (Urban) vs. Mbalmayo (Semi-Urban)	Coyote (Rural) vs. Sparrow (Urban)	-85.1348	0	0	0.001
USA (Urban) vs. all	Coyote (Rural) vs. Sparrow (Urban)	-56.4157	0	0	0.001
USA (Urban) vs. all	Coyote (Rural) vs. Sparrow (Urban)	-138.129	0	0	0.001
USA (Urban) vs. Sparrow (Urban)	Coyote (Rural) vs. Sparrow (Urban)	19.175	0	0	0.001
USA (Urban) vs. Tibet (Rural)	Coyote (Rural) vs. Sparrow (Urban)	-67.6029	0	0	0.001
USA (Urban) vs. Tibet (Urban)	Coyote (Rural) vs. Sparrow (Urban)	-110.124	0	0	0.001
USA (Urban) vs. USA (Urban)	Coyote (Rural) vs. Sparrow (Urban)	-156.91	0	0	0.001
USA (Urban) vs. Venezuela (Rural)	Coyote (Rural) vs. Sparrow (Urban)	-101.06	0	0	0.001
Venezuela (Rural) vs. Venezuela (Rural)	Coyote (Rural) vs. Sparrow (Urban)	-122.097	0	0	0.001
Yaounde (Urban) vs. Coyote (Rural)	Coyote (Rural) vs. Sparrow (Urban)	-8.83305	1.50451e-18	2.75867e-14	0.001
Yaounde (Urban) vs. Coyote (Urban)	Coyote (Rural) vs. Sparrow (Urban)	-12.1348	4.81734e-33	8.83308e-29	0.001
Yaounde (Urban) vs. Mayaguez (Urban)	Coyote (Rural) vs. Sparrow (Urban)	-10.4109	6.42519e-25	1.17812e-20	0.001
Yaounde (Urban) vs. Mbalmayo (Semi-Urban)	Coyote (Rural) vs. Sparrow (Urban)	-99.1463	0	0	0.001
Yaounde (Urban) vs. all	Coyote (Rural) vs. Sparrow (Urban)	-49.9271	0	0	0.001
Yaounde (Urban) vs. all	Coyote (Rural) vs. Sparrow (Urban)	-80.1101	0	0	0.001
Yaounde (Urban) vs. Sparrow (Urban)	Coyote (Rural) vs. Sparrow (Urban)	5.58815	2.45587e-08	0.000450309	0.001
Yaounde (Urban) vs. Tibet (Rural)	Coyote (Rural) vs. Sparrow (Urban)	-65.4051	0	0	0.001
Yaounde (Urban) vs. Tibet (Urban)	Coyote (Rural) vs. Sparrow (Urban)	-67.9756	0	0	0.001
Yaounde (Urban) vs. USA (Urban)	Coyote (Rural) vs. Sparrow (Urban)	-99.8638	0	0	0.001
Yaounde (Urban) vs. Venezuela (Rural)	Coyote (Rural) vs. Sparrow (Urban)	-104.889	0	0	0.001
Yaounde (Urban) vs. Yaounde (Urban)	Coyote (Rural) vs. Sparrow (Urban)	-95.1659	0	0	0.001
All between population	Coyote (Rural) vs. Tibet (Rural)	-14.9946	8.44285e-51	1.54808e-46	0.001
All within population	Coyote (Rural) vs. Tibet (Rural)	-52.6641	0	0	0.001
Coyote (Rural) vs. Coyote (Rural)	Coyote (Rural) vs. Tibet (Rural)	-32.9714	1.25284e-185	2.29721e-181	0.001
Coyote (Rural) vs. Coyote (Urban)	Coyote (Rural) vs. Tibet (Rural)	-26.1003	3.23784e-113	5.9369e-109	0.001
Coyote (Rural) vs. Mayaguez (Urban)	Coyote (Rural) vs. Tibet (Rural)	-5.7399	1.28001e-08	0.000234703	0.001
Coyote (Rural) vs. Mbalmayo (Semi-Urban)	Coyote (Rural) vs. Tibet (Rural)	-4.07402	4.86149e-05	0.891402	0.002
Coyote (Rural) vs. all	Coyote (Rural) vs. Tibet (Rural)	-5.76251	9.85717e-09	0.000180741	0.001
Coyote (Rural) vs. Sparrow (Urban)	Coyote (Rural) vs. Tibet (Rural)	-1.17973	0.238204	1	0.241
Coyote (Rural) vs. Tibet (Urban)	Coyote (Rural) vs. Tibet (Rural)	-8.7109	1.61561e-17	2.96238e-13	0.001
Coyote (Rural) vs. Venezuela (Rural)	Coyote (Rural) vs. Tibet (Rural)	-9.24963	4.84281e-20	8.87978e-16	0.001
Coyote (Urban) vs. Coyote (Urban)	Coyote (Rural) vs. Tibet (Rural)	-24.0025	4.39632e-83	8.06109e-79	0.001
Malawi (Rural) vs. Coyote (Rural)	Coyote (Rural) vs. Tibet (Rural)	-5.15084	2.74913e-07	0.00504081	0.001
Malawi (Rural) vs. Coyote (Urban)	Coyote (Rural) vs. Tibet (Rural)	-8.42775	1.28717e-16	2.36015e-12	0.001
Malawi (Rural) vs. Malawi (Rural)	Coyote (Rural) vs. Tibet (Rural)	-93.777	0	0	0.001
Malawi (Rural) vs. Maricao (Rural)	Coyote (Rural) vs. Tibet (Rural)	8.49038	0	0	0.001
Malawi (Rural) vs. Mayaguez (Urban)	Coyote (Rural) vs. Tibet (Rural)	-1.38651	0.165915	1	0.173
Malawi (Rural) vs. Mbalmayo (Semi-Urban)	Coyote (Rural) vs. Tibet (Rural)	-67.3289	0	0	0.001
Malawi (Rural) vs. all	Coyote (Rural) vs. Tibet (Rural)	-54.5879	5.33356e-241	9.77961e-237	0.001
Malawi (Rural) vs. all	Coyote (Rural) vs. Tibet (Rural)	-45.1802	5.10727e-294	9.36468e-290	0.001
Malawi (Rural) vs. Sparrow (Rural)	Coyote (Rural) vs. Tibet (Rural)	10.2163	0	0	0.001
Malawi (Rural) vs. Sparrow (Urban)	Coyote (Rural) vs. Tibet (Rural)	10.7558	0	0	0.001
Malawi (Rural) vs. Tibet (Rural)	Coyote (Rural) vs. Tibet (Rural)	-67.4768	0	0	0.001
Malawi (Rural) vs. Tibet (Semi-Urban)	Coyote (Rural) vs. Tibet (Rural)	-44.7061	5.48236e-225	1.00525e-220	0.001
Malawi (Rural) vs. Tibet (Urban)	Coyote (Rural) vs. Tibet (Rural)	-56.6939	2.24387e-290	4.11436e-286	0.001
Malawi (Rural) vs. USA (Urban)	Coyote (Rural) vs. Tibet (Rural)	-47.5079	0	0	0.001
Malawi (Rural) vs. Venezuela (Rural)	Coyote (Rural) vs. Tibet (Rural)	-58.8622	0	0	0.001
Malawi (Rural) vs. Yaounde (Urban)	Coyote (Rural) vs. Tibet (Rural)	-52.4865	0	0	0.001
Maricao (Rural) (non-cristatellus)noncristatellus vs. Coyote (Rural)	Coyote (Rural) vs. Tibet (Rural)	4.17393	3.1206e-05	0.572193	0.001
Maricao (Rural) (non-cristatellus)noncristatellus vs. Coyote (Urban)	Coyote (Rural) vs. Tibet (Rural)	1.99518	0.0463973	1	0.047
Maricao (Rural) (non-cristatellus)noncristatellus vs. Malawi (Rural)	Coyote (Rural) vs. Tibet (Rural)	15.1702	0	0	0.001
Maricao (Rural) (non-cristatellus)noncristatellus vs. Maricao (Rural)	Coyote (Rural) vs. Tibet (Rural)	-40.0196	2.0988e-237	3.84836e-233	0.001
Maricao (Rural) (non-cristatellus)noncristatellus vs. Maricao (Rural) (non-cristatellus)noncristatellus	Coyote (Rural) vs. Tibet (Rural)	-39.5553	2.33727e-197	4.28562e-193	0.001
Maricao (Rural) (non-cristatellus)noncristatellus vs. Mayaguez (Urban)	Coyote (Rural) vs. Tibet (Rural)	-33.1378	3.00843e-147	5.51625e-143	0.001
Maricao (Rural) (non-cristatellus)noncristatellus vs. Mbalmayo (Semi-Urban)	Coyote (Rural) vs. Tibet (Rural)	-2.21151	0.027212	1	0.027
Maricao (Rural) (non-cristatellus)noncristatellus vs. all	Coyote (Rural) vs. Tibet (Rural)	-0.911035	0.362685	1	0.338
Maricao (Rural) (non-cristatellus)noncristatellus vs. all	Coyote (Rural) vs. Tibet (Rural)	-12.389	3.42857e-33	6.28662e-29	0.001
Maricao (Rural) (non-cristatellus)noncristatellus vs. Sparrow (Rural)	Coyote (Rural) vs. Tibet (Rural)	15.2678	0	0	0.001
Maricao (Rural) (non-cristatellus)noncristatellus vs. Sparrow (Urban)	Coyote (Rural) vs. Tibet (Rural)	0.112631	0.910335	1	0.912
Maricao (Rural) (non-cristatellus)noncristatellus vs. Tibet (Rural)	Coyote (Rural) vs. Tibet (Rural)	3.95128	8.60844e-05	1	0.001
Maricao (Rural) (non-cristatellus)noncristatellus vs. Tibet (Semi-Urban)	Coyote (Rural) vs. Tibet (Rural)	0.810983	0.417667	1	0.413
Maricao (Rural) (non-cristatellus)noncristatellus vs. Tibet (Urban)	Coyote (Rural) vs. Tibet (Rural)	-9.03113	1.8376e-18	3.36943e-14	0.001
Maricao (Rural) (non-cristatellus)noncristatellus vs. USA (Urban)	Coyote (Rural) vs. Tibet (Rural)	-11.0806	2.58467e-28	4.73925e-24	0.001
Maricao (Rural) (non-cristatellus)noncristatellus vs. Venezuela (Rural)	Coyote (Rural) vs. Tibet (Rural)	1.2828	0.199747	1	0.187
Maricao (Rural) (non-cristatellus)noncristatellus vs. Yaounde (Urban)	Coyote (Rural) vs. Tibet (Rural)	-8.50162	5.01263e-17	9.19115e-13	0.001
Maricao (Rural) vs. Coyote (Rural)	Coyote (Rural) vs. Tibet (Rural)	2.16436	0.0305447	1	0.03
Maricao (Rural) vs. Coyote (Urban)	Coyote (Rural) vs. Tibet (Rural)	-1.44138	0.149891	1	0.15
Maricao (Rural) vs. Maricao (Rural)	Coyote (Rural) vs. Tibet (Rural)	-38.7998	6.66076e-200	1.22132e-195	0.001
Maricao (Rural) vs. Mayaguez (Urban)	Coyote (Rural) vs. Tibet (Rural)	-35.9774	8.51182e-166	1.56073e-161	0.001
Maricao (Rural) vs. Mbalmayo (Semi-Urban)	Coyote (Rural) vs. Tibet (Rural)	-5.7798	9.67051e-09	0.000177318	0.001
Maricao (Rural) vs. all	Coyote (Rural) vs. Tibet (Rural)	-4.08258	5.11505e-05	0.937896	0.001
Maricao (Rural) vs. all	Coyote (Rural) vs. Tibet (Rural)	-15.4241	3.33552e-49	6.116e-45	0.001
Maricao (Rural) vs. Sparrow (Urban)	Coyote (Rural) vs. Tibet (Rural)	-2.82536	0.00476928	1	0.008
Maricao (Rural) vs. Tibet (Rural)	Coyote (Rural) vs. Tibet (Rural)	1.71635	0.0865495	1	0.083
Maricao (Rural) vs. Tibet (Semi-Urban)	Coyote (Rural) vs. Tibet (Rural)	-3.56339	0.000391469	1	0.001
Maricao (Rural) vs. Tibet (Urban)	Coyote (Rural) vs. Tibet (Rural)	-11.8949	8.53161e-30	1.56436e-25	0.001
Maricao (Rural) vs. USA (Urban)	Coyote (Rural) vs. Tibet (Rural)	-14.6582	4.85276e-48	8.89802e-44	0.001
Maricao (Rural) vs. Venezuela (Rural)	Coyote (Rural) vs. Tibet (Rural)	-3.00968	0.00265353	1	0.005
Maricao (Rural) vs. Yaounde (Urban)	Coyote (Rural) vs. Tibet (Rural)	-11.3085	1.95385e-28	3.58258e-24	0.001
Mayaguez (Urban) vs. Mayaguez (Urban)	Coyote (Rural) vs. Tibet (Rural)	-35.0792	5.64875e-132	1.03575e-127	0.001
Mbalmayo (Semi-Urban) vs. Mbalmayo (Semi-Urban)	Coyote (Rural) vs. Tibet (Rural)	-58.4435	2.87793e-255	5.27697e-251	0.001
Ngoantet (Rural) vs. Coyote (Rural)	Coyote (Rural) vs. Tibet (Rural)	-3.75859	0.000173053	1	0.001
Ngoantet (Rural) vs. Coyote (Urban)	Coyote (Rural) vs. Tibet (Rural)	-8.96757	1.14447e-18	2.0985e-14	0.001
Ngoantet (Rural) vs. Malawi (Rural)	Coyote (Rural) vs. Tibet (Rural)	-59.0145	0	0	0.001
Ngoantet (Rural) vs. Maricao (Rural)	Coyote (Rural) vs. Tibet (Rural)	-4.73098	2.33547e-06	0.0428233	0.001
Ngoantet (Rural) vs. Maricao (Rural) (non-cristatellus)noncristatellus	Coyote (Rural) vs. Tibet (Rural)	-1.37725	0.168545	1	0.169
Ngoantet (Rural) vs. Mayaguez (Urban)	Coyote (Rural) vs. Tibet (Rural)	-7.05757	2.86624e-12	5.25554e-08	0.001
Ngoantet (Rural) vs. Mbalmayo (Semi-Urban)	Coyote (Rural) vs. Tibet (Rural)	-50.87	0	0	0.001
Ngoantet (Rural) vs. all	Coyote (Rural) vs. Tibet (Rural)	-43.5875	7.32761e-205	1.34359e-200	0.001
Ngoantet (Rural) vs. all	Coyote (Rural) vs. Tibet (Rural)	-32.3721	1.42691e-189	2.61639e-185	0.001
Ngoantet (Rural) vs. Ngoantet (Rural)	Coyote (Rural) vs. Tibet (Rural)	-45.2819	0	0	0.001
Ngoantet (Rural) vs. Sparrow (Rural)	Coyote (Rural) vs. Tibet (Rural)	20.6603	0	0	0.001
Ngoantet (Rural) vs. Sparrow (Urban)	Coyote (Rural) vs. Tibet (Rural)	13.211	0	0	0.001
Ngoantet (Rural) vs. Tibet (Rural)	Coyote (Rural) vs. Tibet (Rural)	-47.1611	2.3626e-260	4.33206e-256	0.001
Ngoantet (Rural) vs. Tibet (Semi-Urban)	Coyote (Rural) vs. Tibet (Rural)	-35.1212	1.01387e-178	1.85902e-174	0.001
Ngoantet (Rural) vs. Tibet (Urban)	Coyote (Rural) vs. Tibet (Rural)	-42.2155	1.61542e-227	2.96204e-223	0.001
Ngoantet (Rural) vs. USA (Urban)	Coyote (Rural) vs. Tibet (Rural)	-35.23	4.45652e-263	8.17147e-259	0.001
Ngoantet (Rural) vs. Venezuela (Rural)	Coyote (Rural) vs. Tibet (Rural)	-47.9511	0	0	0.001
Ngoantet (Rural) vs. Yaounde (Urban)	Coyote (Rural) vs. Tibet (Rural)	-42.5205	2.71592e-302	4.97992e-298	0.001
Sparrow (Rural) vs. Coyote (Rural)	Coyote (Rural) vs. Tibet (Rural)	6.11582	1.20337e-09	2.20651e-05	0.001
Sparrow (Rural) vs. Coyote (Urban)	Coyote (Rural) vs. Tibet (Rural)	7.18549	1.85874e-12	3.40818e-08	0.001
Sparrow (Rural) vs. Maricao (Rural)	Coyote (Rural) vs. Tibet (Rural)	3.49632	0.000489015	1	0.001
Sparrow (Rural) vs. Mayaguez (Urban)	Coyote (Rural) vs. Tibet (Rural)	5.97854	3.73079e-09	6.84077e-05	0.001
Sparrow (Rural) vs. Mbalmayo (Semi-Urban)	Coyote (Rural) vs. Tibet (Rural)	10.9111	0	0	0.001
Sparrow (Rural) vs. all	Coyote (Rural) vs. Tibet (Rural)	5.37721	1.15752e-07	0.00212243	0.001
Sparrow (Rural) vs. all	Coyote (Rural) vs. Tibet (Rural)	15.2592	0	0	0.001
Sparrow (Rural) vs. Sparrow (Rural)	Coyote (Rural) vs. Tibet (Rural)	-14.9232	1.15243e-43	2.1131e-39	0.001
Sparrow (Rural) vs. Sparrow (Urban)	Coyote (Rural) vs. Tibet (Rural)	-15.776	5.5699e-52	1.0213e-47	0.001
Sparrow (Rural) vs. Tibet (Rural)	Coyote (Rural) vs. Tibet (Rural)	8.74973	0	0	0.001
Sparrow (Rural) vs. Tibet (Semi-Urban)	Coyote (Rural) vs. Tibet (Rural)	8.40227	4.44089e-16	8.14282e-12	0.001
Sparrow (Rural) vs. Tibet (Urban)	Coyote (Rural) vs. Tibet (Rural)	7.11279	3.26117e-12	5.97968e-08	0.001
Sparrow (Rural) vs. USA (Urban)	Coyote (Rural) vs. Tibet (Rural)	27.7778	0	0	0.001
Sparrow (Rural) vs. Venezuela (Rural)	Coyote (Rural) vs. Tibet (Rural)	8.50857	0	0	0.001
Sparrow (Rural) vs. Yaounde (Urban)	Coyote (Rural) vs. Tibet (Rural)	12.3371	0	0	0.001
Sparrow (Urban) vs. Sparrow (Urban)	Coyote (Rural) vs. Tibet (Rural)	-16.5787	8.48229e-57	1.55531e-52	0.001
Tibet (Rural) vs. Tibet (Rural)	Coyote (Rural) vs. Tibet (Rural)	-48.1589	5.88306e-178	1.07872e-173	0.001
Tibet (Semi-Urban) vs. Coyote (Rural)	Coyote (Rural) vs. Tibet (Rural)	-4.95201	8.89976e-07	0.0163186	0.001
Tibet (Semi-Urban) vs. Coyote (Urban)	Coyote (Rural) vs. Tibet (Rural)	-8.74421	3.53563e-17	6.48292e-13	0.001
Tibet (Semi-Urban) vs. Mayaguez (Urban)	Coyote (Rural) vs. Tibet (Rural)	-6.90927	1.50757e-11	2.76427e-07	0.001
Tibet (Semi-Urban) vs. Mbalmayo (Semi-Urban)	Coyote (Rural) vs. Tibet (Rural)	-38.1254	2.28245e-160	4.1851e-156	0.001
Tibet (Semi-Urban) vs. all	Coyote (Rural) vs. Tibet (Rural)	-32.4398	1.96751e-119	3.60762e-115	0.001
Tibet (Semi-Urban) vs. all	Coyote (Rural) vs. Tibet (Rural)	-26.9421	1.04343e-105	1.91323e-101	0.001
Tibet (Semi-Urban) vs. Sparrow (Urban)	Coyote (Rural) vs. Tibet (Rural)	10.7704	0	0	0.001
Tibet (Semi-Urban) vs. Tibet (Rural)	Coyote (Rural) vs. Tibet (Rural)	-39.3435	5.26378e-152	9.65167e-148	0.001
Tibet (Semi-Urban) vs. Tibet (Semi-Urban)	Coyote (Rural) vs. Tibet (Rural)	-35.3145	9.33875e-131	1.71235e-126	0.001
Tibet (Semi-Urban) vs. Tibet (Urban)	Coyote (Rural) vs. Tibet (Rural)	-29.1806	3.01559e-108	5.52938e-104	0.001
Tibet (Semi-Urban) vs. USA (Urban)	Coyote (Rural) vs. Tibet (Rural)	-31.779	3.08969e-183	5.66526e-179	0.001
Tibet (Semi-Urban) vs. Venezuela (Rural)	Coyote (Rural) vs. Tibet (Rural)	-41.2426	1.50028e-191	2.75092e-187	0.001
Tibet (Semi-Urban) vs. Yaounde (Urban)	Coyote (Rural) vs. Tibet (Rural)	-39.3082	1.7418e-173	3.19377e-169	0.001
Tibet (Urban) vs. Tibet (Urban)	Coyote (Rural) vs. Tibet (Rural)	-28.1312	1.52036e-100	2.78774e-96	0.001
USA (Urban) vs. Coyote (Rural)	Coyote (Rural) vs. Tibet (Rural)	-8.44874	3.27496e-17	6.00496e-13	0.001
USA (Urban) vs. Coyote (Urban)	Coyote (Rural) vs. Tibet (Rural)	-10.3521	1.17942e-24	2.16258e-20	0.001
USA (Urban) vs. Mayaguez (Urban)	Coyote (Rural) vs. Tibet (Rural)	-16.7642	4.45177e-60	8.16277e-56	0.001
USA (Urban) vs. Mbalmayo (Semi-Urban)	Coyote (Rural) vs. Tibet (Rural)	-37.1689	2.14242e-268	3.92834e-264	0.001
USA (Urban) vs. all	Coyote (Rural) vs. Tibet (Rural)	-31.6897	1.52411e-164	2.79462e-160	0.001
USA (Urban) vs. all	Coyote (Rural) vs. Tibet (Rural)	-58.9043	0	0	0.001
USA (Urban) vs. Sparrow (Urban)	Coyote (Rural) vs. Tibet (Rural)	14.8176	0	0	0.001
USA (Urban) vs. Tibet (Rural)	Coyote (Rural) vs. Tibet (Rural)	-33.495	9.92461e-200	1.81978e-195	0.001
USA (Urban) vs. Tibet (Urban)	Coyote (Rural) vs. Tibet (Rural)	-50.4502	0	0	0.001
USA (Urban) vs. USA (Urban)	Coyote (Rural) vs. Tibet (Rural)	-65.3344	0	0	0.001
USA (Urban) vs. Venezuela (Rural)	Coyote (Rural) vs. Tibet (Rural)	-42.9677	0	0	0.001
Venezuela (Rural) vs. Venezuela (Rural)	Coyote (Rural) vs. Tibet (Rural)	-55.9194	0	0	0.001
Yaounde (Urban) vs. Coyote (Rural)	Coyote (Rural) vs. Tibet (Rural)	-8.15781	6.09333e-16	1.11727e-11	0.001
Yaounde (Urban) vs. Coyote (Urban)	Coyote (Rural) vs. Tibet (Rural)	-10.9299	8.56276e-26	1.57007e-21	0.001
Yaounde (Urban) vs. Mayaguez (Urban)	Coyote (Rural) vs. Tibet (Rural)	-12.5932	6.10303e-33	1.11905e-28	0.001
Yaounde (Urban) vs. Mbalmayo (Semi-Urban)	Coyote (Rural) vs. Tibet (Rural)	-47.3906	2.60327e-260	4.77336e-256	0.001
Yaounde (Urban) vs. all	Coyote (Rural) vs. Tibet (Rural)	-29.6115	1.9486e-114	3.57296e-110	0.001
Yaounde (Urban) vs. all	Coyote (Rural) vs. Tibet (Rural)	-39.7222	2.13222e-215	3.90964e-211	0.001
Yaounde (Urban) vs. Sparrow (Urban)	Coyote (Rural) vs. Tibet (Rural)	7.93	3.77476e-15	6.9214e-11	0.001
Yaounde (Urban) vs. Tibet (Rural)	Coyote (Rural) vs. Tibet (Rural)	-38.4504	3.80912e-169	6.9844e-165	0.001
Yaounde (Urban) vs. Tibet (Urban)	Coyote (Rural) vs. Tibet (Rural)	-53.0772	9.89649e-238	1.81462e-233	0.001
Yaounde (Urban) vs. USA (Urban)	Coyote (Rural) vs. Tibet (Rural)	-42.71	0	0	0.001
Yaounde (Urban) vs. Venezuela (Rural)	Coyote (Rural) vs. Tibet (Rural)	-48.7697	6.72491072327e-313	0	0.001
Yaounde (Urban) vs. Yaounde (Urban)	Coyote (Rural) vs. Tibet (Rural)	-50.6247	1.45354e-254	2.66521e-250	0.001
All between population	Coyote (Rural) vs. Tibet (Urban)	-12.813	1.4314e-37	2.62462e-33	0.001
All within population	Coyote (Rural) vs. Tibet (Urban)	-50.7152	0	0	0.001
Coyote (Rural) vs. Coyote (Rural)	Coyote (Rural) vs. Tibet (Urban)	-31.4949	1.12414e-172	2.06122e-168	0.001
Coyote (Rural) vs. Coyote (Urban)	Coyote (Rural) vs. Tibet (Urban)	-24.6722	6.92348e-104	1.26949e-99	0.001
Coyote (Rural) vs. Mayaguez (Urban)	Coyote (Rural) vs. Tibet (Urban)	0.687348	0.492034	1	0.494
Coyote (Rural) vs. Mbalmayo (Semi-Urban)	Coyote (Rural) vs. Tibet (Urban)	8.4953	0	0	0.001
Coyote (Rural) vs. all	Coyote (Rural) vs. Tibet (Urban)	5.61205	2.33845e-08	0.000428779	0.001
Coyote (Rural) vs. Sparrow (Urban)	Coyote (Rural) vs. Tibet (Urban)	6.32244	2.97754e-10	5.45962e-06	0.001
Coyote (Rural) vs. Venezuela (Rural)	Coyote (Rural) vs. Tibet (Urban)	-2.86423	0.00421677	1	0.006
Coyote (Urban) vs. Coyote (Urban)	Coyote (Rural) vs. Tibet (Urban)	-21.3808	6.86623e-71	1.25899e-66	0.001
Malawi (Rural) vs. Coyote (Rural)	Coyote (Rural) vs. Tibet (Urban)	7.2317	5.93081e-13	1.08747e-08	0.001
Malawi (Rural) vs. Coyote (Urban)	Coyote (Rural) vs. Tibet (Urban)	-5.04145	5.52739e-07	0.010135	0.001
Malawi (Rural) vs. Malawi (Rural)	Coyote (Rural) vs. Tibet (Urban)	-89.9618	0	0	0.001
Malawi (Rural) vs. Maricao (Rural)	Coyote (Rural) vs. Tibet (Urban)	22.0472	0	0	0.001
Malawi (Rural) vs. Mayaguez (Urban)	Coyote (Rural) vs. Tibet (Urban)	8.82814	0	0	0.001
Malawi (Rural) vs. Mbalmayo (Semi-Urban)	Coyote (Rural) vs. Tibet (Urban)	-63.6305	0	0	0.001
Malawi (Rural) vs. all	Coyote (Rural) vs. Tibet (Urban)	-49.3991	7.64481e-219	1.40175e-214	0.001
Malawi (Rural) vs. all	Coyote (Rural) vs. Tibet (Urban)	-38.9059	1.05004e-237	1.92536e-233	0.001
Malawi (Rural) vs. Sparrow (Rural)	Coyote (Rural) vs. Tibet (Urban)	19.716	0	0	0.001
Malawi (Rural) vs. Sparrow (Urban)	Coyote (Rural) vs. Tibet (Urban)	25.8509	0	0	0.001
Malawi (Rural) vs. Tibet (Rural)	Coyote (Rural) vs. Tibet (Urban)	-60.06	2.35996e-307	4.32723e-303	0.001
Malawi (Rural) vs. Tibet (Semi-Urban)	Coyote (Rural) vs. Tibet (Urban)	-40.8002	4.95476e-202	9.08506e-198	0.001
Malawi (Rural) vs. Tibet (Urban)	Coyote (Rural) vs. Tibet (Urban)	-47.8853	4.37282e-243	8.018e-239	0.001
Malawi (Rural) vs. USA (Urban)	Coyote (Rural) vs. Tibet (Urban)	-43.8317	0	0	0.001
Malawi (Rural) vs. Venezuela (Rural)	Coyote (Rural) vs. Tibet (Urban)	-56.3886	0	0	0.001
Malawi (Rural) vs. Yaounde (Urban)	Coyote (Rural) vs. Tibet (Urban)	-49.1675	0	0	0.001
Maricao (Rural) (non-cristatellus)noncristatellus vs. Coyote (Rural)	Coyote (Rural) vs. Tibet (Urban)	15.1624	0	0	0.001
Maricao (Rural) (non-cristatellus)noncristatellus vs. Coyote (Urban)	Coyote (Rural) vs. Tibet (Urban)	8.20321	1.11022e-15	2.0357e-11	0.001
Maricao (Rural) (non-cristatellus)noncristatellus vs. Malawi (Rural)	Coyote (Rural) vs. Tibet (Urban)	24.0802	0	0	0.001
Maricao (Rural) (non-cristatellus)noncristatellus vs. Maricao (Rural)	Coyote (Rural) vs. Tibet (Urban)	-37.0904	5.0437e-213	9.24813e-209	0.001
Maricao (Rural) (non-cristatellus)noncristatellus vs. Maricao (Rural) (non-cristatellus)noncristatellus	Coyote (Rural) vs. Tibet (Urban)	-36.6087	5.8731e-179	1.07689e-174	0.001
Maricao (Rural) (non-cristatellus)noncristatellus vs. Mayaguez (Urban)	Coyote (Rural) vs. Tibet (Urban)	-29.1502	3.48041e-124	6.38169e-120	0.001
Maricao (Rural) (non-cristatellus)noncristatellus vs. Mbalmayo (Semi-Urban)	Coyote (Rural) vs. Tibet (Urban)	8.74302	0	0	0.001
Maricao (Rural) (non-cristatellus)noncristatellus vs. all	Coyote (Rural) vs. Tibet (Urban)	4.53176	7.21285e-06	0.132255	0.001
Maricao (Rural) (non-cristatellus)noncristatellus vs. all	Coyote (Rural) vs. Tibet (Urban)	-3.63216	0.000293358	1	0.001
Maricao (Rural) (non-cristatellus)noncristatellus vs. Sparrow (Rural)	Coyote (Rural) vs. Tibet (Urban)	17.3734	0	0	0.001
Maricao (Rural) (non-cristatellus)noncristatellus vs. Sparrow (Urban)	Coyote (Rural) vs. Tibet (Urban)	9.19406	0	0	0.001
Maricao (Rural) (non-cristatellus)noncristatellus vs. Tibet (Rural)	Coyote (Rural) vs. Tibet (Urban)	8.48291	2.22045e-16	4.07141e-12	0.001
Maricao (Rural) (non-cristatellus)noncristatellus vs. Tibet (Semi-Urban)	Coyote (Rural) vs. Tibet (Urban)	7.12903	2.65277e-12	4.86411e-08	0.001
Maricao (Rural) (non-cristatellus)noncristatellus vs. Tibet (Urban)	Coyote (Rural) vs. Tibet (Urban)	1.42432	0.154826	1	0.146
Maricao (Rural) (non-cristatellus)noncristatellus vs. USA (Urban)	Coyote (Rural) vs. Tibet (Urban)	1.09625	0.273003	1	0.26
Maricao (Rural) (non-cristatellus)noncristatellus vs. Venezuela (Rural)	Coyote (Rural) vs. Tibet (Urban)	13.1783	0	0	0.001
Maricao (Rural) (non-cristatellus)noncristatellus vs. Yaounde (Urban)	Coyote (Rural) vs. Tibet (Urban)	2.21625	0.026845	1	0.034
Maricao (Rural) vs. Coyote (Rural)	Coyote (Rural) vs. Tibet (Urban)	15.1165	0	0	0.001
Maricao (Rural) vs. Coyote (Urban)	Coyote (Rural) vs. Tibet (Urban)	5.85094	7.28554e-09	0.000133588	0.001
Maricao (Rural) vs. Maricao (Rural)	Coyote (Rural) vs. Tibet (Urban)	-36.0832	8.99381e-182	1.6491e-177	0.001
Maricao (Rural) vs. Mayaguez (Urban)	Coyote (Rural) vs. Tibet (Urban)	-32.9544	3.24085e-148	5.94242e-144	0.001
Maricao (Rural) vs. Mbalmayo (Semi-Urban)	Coyote (Rural) vs. Tibet (Urban)	6.01754	2.39085e-09	4.38386e-05	0.001
Maricao (Rural) vs. all	Coyote (Rural) vs. Tibet (Urban)	3.27259	0.00113252	1	0.001
Maricao (Rural) vs. all	Coyote (Rural) vs. Tibet (Urban)	-7.63991	4.35262e-14	7.98096e-10	0.001
Maricao (Rural) vs. Sparrow (Urban)	Coyote (Rural) vs. Tibet (Urban)	3.1125	0.00188121	1	0.001
Maricao (Rural) vs. Tibet (Rural)	Coyote (Rural) vs. Tibet (Urban)	7.88819	1.19904e-14	2.19856e-10	0.001
Maricao (Rural) vs. Tibet (Semi-Urban)	Coyote (Rural) vs. Tibet (Urban)	4.71547	2.92214e-06	0.0535803	0.001
Maricao (Rural) vs. Tibet (Urban)	Coyote (Rural) vs. Tibet (Urban)	-0.524297	0.600241	1	0.615
Maricao (Rural) vs. USA (Urban)	Coyote (Rural) vs. Tibet (Urban)	-4.95262	7.46909e-07	0.0136953	0.001
Maricao (Rural) vs. Venezuela (Rural)	Coyote (Rural) vs. Tibet (Urban)	8.32765	2.22045e-16	4.07141e-12	0.001
Maricao (Rural) vs. Yaounde (Urban)	Coyote (Rural) vs. Tibet (Urban)	-1.64093	0.101036	1	0.097
Mayaguez (Urban) vs. Mayaguez (Urban)	Coyote (Rural) vs. Tibet (Urban)	-28.6641	2.50416e-104	4.59162e-100	0.001
Mbalmayo (Semi-Urban) vs. Mbalmayo (Semi-Urban)	Coyote (Rural) vs. Tibet (Urban)	-53.4043	6.71253e-235	1.23081e-230	0.001
Ngoantet (Rural) vs. Coyote (Rural)	Coyote (Rural) vs. Tibet (Urban)	8.27411	2.22045e-16	4.07141e-12	0.001
Ngoantet (Rural) vs. Coyote (Urban)	Coyote (Rural) vs. Tibet (Urban)	-4.32907	1.62282e-05	0.29756	0.001
Ngoantet (Rural) vs. Malawi (Rural)	Coyote (Rural) vs. Tibet (Urban)	-56.3175	0	0	0.001
Ngoantet (Rural) vs. Maricao (Rural)	Coyote (Rural) vs. Tibet (Urban)	9.95285	0	0	0.001
Ngoantet (Rural) vs. Maricao (Rural) (non-cristatellus)noncristatellus	Coyote (Rural) vs. Tibet (Urban)	13.5919	0	0	0.001
Ngoantet (Rural) vs. Mayaguez (Urban)	Coyote (Rural) vs. Tibet (Urban)	3.33889	0.000867082	1	0.002
Ngoantet (Rural) vs. Mbalmayo (Semi-Urban)	Coyote (Rural) vs. Tibet (Urban)	-48.5593	0	0	0.001
Ngoantet (Rural) vs. all	Coyote (Rural) vs. Tibet (Urban)	-40.8862	1.60335e-190	2.93989e-186	0.001
Ngoantet (Rural) vs. all	Coyote (Rural) vs. Tibet (Urban)	-28.4948	4.34559e-153	7.96807e-149	0.001
Ngoantet (Rural) vs. Ngoantet (Rural)	Coyote (Rural) vs. Tibet (Urban)	-43.3235	0	0	0.001
Ngoantet (Rural) vs. Sparrow (Rural)	Coyote (Rural) vs. Tibet (Urban)	26.6245	0	0	0.001
Ngoantet (Rural) vs. Sparrow (Urban)	Coyote (Rural) vs. Tibet (Urban)	31.2311	0	0	0.001
Ngoantet (Rural) vs. Tibet (Rural)	Coyote (Rural) vs. Tibet (Urban)	-43.6595	3.18922e-237	5.84776e-233	0.001
Ngoantet (Rural) vs. Tibet (Semi-Urban)	Coyote (Rural) vs. Tibet (Urban)	-32.663	1.55999e-161	2.8604e-157	0.001
Ngoantet (Rural) vs. Tibet (Urban)	Coyote (Rural) vs. Tibet (Urban)	-36.6556	2.11766e-189	3.88295e-185	0.001
Ngoantet (Rural) vs. USA (Urban)	Coyote (Rural) vs. Tibet (Urban)	-31.3206	8.76507e-210	1.60716e-205	0.001
Ngoantet (Rural) vs. Venezuela (Rural)	Coyote (Rural) vs. Tibet (Urban)	-45.3481	0	0	0.001
Ngoantet (Rural) vs. Yaounde (Urban)	Coyote (Rural) vs. Tibet (Urban)	-40.0929	1.09382e-275	2.00562e-271	0.001
Sparrow (Rural) vs. Coyote (Rural)	Coyote (Rural) vs. Tibet (Urban)	16.3402	0	0	0.001
Sparrow (Rural) vs. Coyote (Urban)	Coyote (Rural) vs. Tibet (Urban)	9.33567	0	0	0.001
Sparrow (Rural) vs. Maricao (Rural)	Coyote (Rural) vs. Tibet (Urban)	11.6388	0	0	0.001
Sparrow (Rural) vs. Mayaguez (Urban)	Coyote (Rural) vs. Tibet (Urban)	8.91763	0	0	0.001
Sparrow (Rural) vs. Mbalmayo (Semi-Urban)	Coyote (Rural) vs. Tibet (Urban)	13.7048	0	0	0.001
Sparrow (Rural) vs. all	Coyote (Rural) vs. Tibet (Urban)	6.14567	1.615e-09	2.96127e-05	0.001
Sparrow (Rural) vs. all	Coyote (Rural) vs. Tibet (Urban)	15.7684	0	0	0.001
Sparrow (Rural) vs. Sparrow (Rural)	Coyote (Rural) vs. Tibet (Urban)	-13.7406	5.18238e-38	9.50241e-34	0.001
Sparrow (Rural) vs. Sparrow (Urban)	Coyote (Rural) vs. Tibet (Urban)	-14.5612	5.12601e-45	9.39906e-41	0.001
Sparrow (Rural) vs. Tibet (Rural)	Coyote (Rural) vs. Tibet (Urban)	9.06548	0	0	0.001
Sparrow (Rural) vs. Tibet (Semi-Urban)	Coyote (Rural) vs. Tibet (Urban)	8.95527	0	0	0.001
Sparrow (Rural) vs. Tibet (Urban)	Coyote (Rural) vs. Tibet (Urban)	8.54209	2.22045e-16	4.07141e-12	0.001
Sparrow (Rural) vs. USA (Urban)	Coyote (Rural) vs. Tibet (Urban)	43.6873	0	0	0.001
Sparrow (Rural) vs. Venezuela (Rural)	Coyote (Rural) vs. Tibet (Urban)	16.4756	0	0	0.001
Sparrow (Rural) vs. Yaounde (Urban)	Coyote (Rural) vs. Tibet (Urban)	15.9906	0	0	0.001
Sparrow (Urban) vs. Sparrow (Urban)	Coyote (Rural) vs. Tibet (Urban)	-15.2391	7.47657e-49	1.3709e-44	0.001
Tibet (Rural) vs. Tibet (Rural)	Coyote (Rural) vs. Tibet (Urban)	-41.8991	4.98845e-156	9.14682e-152	0.001
Tibet (Semi-Urban) vs. Coyote (Rural)	Coyote (Rural) vs. Tibet (Urban)	4.47455	8.72504e-06	0.159982	0.001
Tibet (Semi-Urban) vs. Coyote (Urban)	Coyote (Rural) vs. Tibet (Urban)	-3.03999	0.00249136	1	0.005
Tibet (Semi-Urban) vs. Mayaguez (Urban)	Coyote (Rural) vs. Tibet (Urban)	-0.157797	0.874681	1	0.881
Tibet (Semi-Urban) vs. Mbalmayo (Semi-Urban)	Coyote (Rural) vs. Tibet (Urban)	-34.3091	6.58135e-142	1.20676e-137	0.001
Tibet (Semi-Urban) vs. all	Coyote (Rural) vs. Tibet (Urban)	-27.568	2.17995e-98	3.99716e-94	0.001
Tibet (Semi-Urban) vs. all	Coyote (Rural) vs. Tibet (Urban)	-23.9255	1.4145e-89	2.59362e-85	0.001
Tibet (Semi-Urban) vs. Sparrow (Urban)	Coyote (Rural) vs. Tibet (Urban)	12.4727	0	0	0.001
Tibet (Semi-Urban) vs. Tibet (Rural)	Coyote (Rural) vs. Tibet (Urban)	-34.3597	3.17104e-131	5.81441e-127	0.001
Tibet (Semi-Urban) vs. Tibet (Semi-Urban)	Coyote (Rural) vs. Tibet (Urban)	-27.473	1.19366e-97	2.18869e-93	0.001
Tibet (Semi-Urban) vs. Tibet (Urban)	Coyote (Rural) vs. Tibet (Urban)	-24.3319	1.11284e-85	2.0405e-81	0.001
Tibet (Semi-Urban) vs. USA (Urban)	Coyote (Rural) vs. Tibet (Urban)	-29.0765	5.88247e-158	1.07861e-153	0.001
Tibet (Semi-Urban) vs. Venezuela (Rural)	Coyote (Rural) vs. Tibet (Urban)	-36.8368	1.28401e-167	2.35436e-163	0.001
Tibet (Semi-Urban) vs. Yaounde (Urban)	Coyote (Rural) vs. Tibet (Urban)	-35.0078	2.35717e-151	4.3221e-147	0.001
Tibet (Urban) vs. Tibet (Urban)	Coyote (Rural) vs. Tibet (Urban)	-21.7878	5.08331e-72	9.32077e-68	0.001
USA (Urban) vs. Coyote (Rural)	Coyote (Rural) vs. Tibet (Urban)	0.954122	0.340041	1	0.338
USA (Urban) vs. Coyote (Urban)	Coyote (Rural) vs. Tibet (Urban)	-3.49505	0.000481621	1	0.001
USA (Urban) vs. Mayaguez (Urban)	Coyote (Rural) vs. Tibet (Urban)	-10.1813	6.47271e-24	1.18684e-19	0.001
USA (Urban) vs. Mbalmayo (Semi-Urban)	Coyote (Rural) vs. Tibet (Urban)	-33.6613	6.57774e-225	1.20609e-220	0.001
USA (Urban) vs. all	Coyote (Rural) vs. Tibet (Urban)	-26.2689	8.59459e-123	1.5759e-118	0.001
USA (Urban) vs. all	Coyote (Rural) vs. Tibet (Urban)	-55.9828	0	0	0.001
USA (Urban) vs. Sparrow (Urban)	Coyote (Rural) vs. Tibet (Urban)	42.9902	0	0	0.001
USA (Urban) vs. Tibet (Rural)	Coyote (Rural) vs. Tibet (Urban)	-28.5985	1.37956e-153	2.52955e-149	0.001
USA (Urban) vs. Tibet (Urban)	Coyote (Rural) vs. Tibet (Urban)	-46.7479	0	0	0.001
USA (Urban) vs. USA (Urban)	Coyote (Rural) vs. Tibet (Urban)	-63.0135	0	0	0.001
USA (Urban) vs. Venezuela (Rural)	Coyote (Rural) vs. Tibet (Urban)	-39.8862	0	0	0.001
Venezuela (Rural) vs. Venezuela (Rural)	Coyote (Rural) vs. Tibet (Urban)	-53.2605	0	1.33517e-304	0.001
Yaounde (Urban) vs. Coyote (Rural)	Coyote (Rural) vs. Tibet (Urban)	1.32466	0.185442	1	0.169
Yaounde (Urban) vs. Coyote (Urban)	Coyote (Rural) vs. Tibet (Urban)	-5.21059	2.47546e-07	0.004539	0.001
Yaounde (Urban) vs. Mayaguez (Urban)	Coyote (Rural) vs. Tibet (Urban)	-4.39967	1.25206e-05	0.229578	0.001
Yaounde (Urban) vs. Mbalmayo (Semi-Urban)	Coyote (Rural) vs. Tibet (Urban)	-44.326	2.49429e-240	4.57353e-236	0.001
Yaounde (Urban) vs. all	Coyote (Rural) vs. Tibet (Urban)	-26.3554	1.88747e-98	3.46086e-94	0.001
Yaounde (Urban) vs. all	Coyote (Rural) vs. Tibet (Urban)	-36.1477	9.6041e-190	1.76101e-185	0.001
Yaounde (Urban) vs. Sparrow (Urban)	Coyote (Rural) vs. Tibet (Urban)	19.326	0	0	0.001
Yaounde (Urban) vs. Tibet (Rural)	Coyote (Rural) vs. Tibet (Urban)	-34.142	8.65659e-147	1.58727e-142	0.001
Yaounde (Urban) vs. Tibet (Urban)	Coyote (Rural) vs. Tibet (Urban)	-43.4349	8.20103e-194	1.50374e-189	0.001
Yaounde (Urban) vs. USA (Urban)	Coyote (Rural) vs. Tibet (Urban)	-39.6058	7.85899806368967e-310	1.44103e-305	0.001
Yaounde (Urban) vs. Venezuela (Rural)	Coyote (Rural) vs. Tibet (Urban)	-45.463	1.95997e-285	3.5938e-281	0.001
Yaounde (Urban) vs. Yaounde (Urban)	Coyote (Rural) vs. Tibet (Urban)	-46.3911	1.66087e-231	3.04536e-227	0.001
All between population	Coyote (Rural) vs. Venezuela (Rural)	-25.6471	7.49428e-145	1.37415e-140	0.001
All within population	Coyote (Rural) vs. Venezuela (Rural)	-108.265	0	0	0.001
Coyote (Rural) vs. Coyote (Rural)	Coyote (Rural) vs. Venezuela (Rural)	-65.1811	0	0	0.001
Coyote (Rural) vs. Coyote (Urban)	Coyote (Rural) vs. Venezuela (Rural)	-49.2566	0	0	0.001
Coyote (Rural) vs. Mbalmayo (Semi-Urban)	Coyote (Rural) vs. Venezuela (Rural)	12.0858	0	0	0.001
Coyote (Rural) vs. Sparrow (Urban)	Coyote (Rural) vs. Venezuela (Rural)	15.1473	0	0	0.001
Coyote (Urban) vs. Coyote (Urban)	Coyote (Rural) vs. Venezuela (Rural)	-30.3369	6.91134e-167	1.26726e-162	0.001
Malawi (Rural) vs. Coyote (Rural)	Coyote (Rural) vs. Venezuela (Rural)	15.6052	0	0	0.001
Malawi (Rural) vs. Coyote (Urban)	Coyote (Rural) vs. Venezuela (Rural)	-5.85627	5.35112e-09	9.81181e-05	0.001
Malawi (Rural) vs. Malawi (Rural)	Coyote (Rural) vs. Venezuela (Rural)	-173.894	0	0	0.001
Malawi (Rural) vs. Maricao (Rural)	Coyote (Rural) vs. Venezuela (Rural)	22.4585	0	0	0.001
Malawi (Rural) vs. Mayaguez (Urban)	Coyote (Rural) vs. Venezuela (Rural)	9.96056	0	0	0.001
Malawi (Rural) vs. Mbalmayo (Semi-Urban)	Coyote (Rural) vs. Venezuela (Rural)	-119.423	0	0	0.001
Malawi (Rural) vs. all	Coyote (Rural) vs. Venezuela (Rural)	-73.2262	0	0	0.001
Malawi (Rural) vs. all	Coyote (Rural) vs. Venezuela (Rural)	-60.6583	0	0	0.001
Malawi (Rural) vs. Sparrow (Rural)	Coyote (Rural) vs. Venezuela (Rural)	19.5399	0	0	0.001
Malawi (Rural) vs. Sparrow (Urban)	Coyote (Rural) vs. Venezuela (Rural)	27.5422	0	0	0.001
Malawi (Rural) vs. Tibet (Rural)	Coyote (Rural) vs. Venezuela (Rural)	-86.0623	0	0	0.001
Malawi (Rural) vs. Tibet (Semi-Urban)	Coyote (Rural) vs. Venezuela (Rural)	-67.3946	0	0	0.001
Malawi (Rural) vs. Tibet (Urban)	Coyote (Rural) vs. Venezuela (Rural)	-61.3531	0	0	0.001
Malawi (Rural) vs. USA (Urban)	Coyote (Rural) vs. Venezuela (Rural)	-89.7631	0	0	0.001
Malawi (Rural) vs. Venezuela (Rural)	Coyote (Rural) vs. Venezuela (Rural)	-114.849	0	0	0.001
Malawi (Rural) vs. Yaounde (Urban)	Coyote (Rural) vs. Venezuela (Rural)	-94.505	0	0	0.001
Maricao (Rural) (non-cristatellus)noncristatellus vs. Coyote (Rural)	Coyote (Rural) vs. Venezuela (Rural)	20.445	0	0	0.001
Maricao (Rural) (non-cristatellus)noncristatellus vs. Coyote (Urban)	Coyote (Rural) vs. Venezuela (Rural)	8.73473	0	0	0.001
Maricao (Rural) (non-cristatellus)noncristatellus vs. Malawi (Rural)	Coyote (Rural) vs. Venezuela (Rural)	22.9482	0	0	0.001
Maricao (Rural) (non-cristatellus)noncristatellus vs. Maricao (Rural)	Coyote (Rural) vs. Venezuela (Rural)	-69.9881	0	0	0.001
Maricao (Rural) (non-cristatellus)noncristatellus vs. Maricao (Rural) (non-cristatellus)noncristatellus	Coyote (Rural) vs. Venezuela (Rural)	-64.9173	0	0	0.001
Maricao (Rural) (non-cristatellus)noncristatellus vs. Mayaguez (Urban)	Coyote (Rural) vs. Venezuela (Rural)	-44.1859	0	1.80042e-304	0.001
Maricao (Rural) (non-cristatellus)noncristatellus vs. Mbalmayo (Semi-Urban)	Coyote (Rural) vs. Venezuela (Rural)	10.4737	0	0	0.001
Maricao (Rural) (non-cristatellus)noncristatellus vs. all	Coyote (Rural) vs. Venezuela (Rural)	4.81227	1.59859e-06	0.0293118	0.001
Maricao (Rural) (non-cristatellus)noncristatellus vs. all	Coyote (Rural) vs. Venezuela (Rural)	-0.384967	0.700292	1	0.685
Maricao (Rural) (non-cristatellus)noncristatellus vs. Sparrow (Rural)	Coyote (Rural) vs. Venezuela (Rural)	15.9032	0	0	0.001
Maricao (Rural) (non-cristatellus)noncristatellus vs. Sparrow (Urban)	Coyote (Rural) vs. Venezuela (Rural)	15.6547	0	0	0.001
Maricao (Rural) (non-cristatellus)noncristatellus vs. Tibet (Rural)	Coyote (Rural) vs. Venezuela (Rural)	8.24757	2.22045e-16	4.07141e-12	0.001
Maricao (Rural) (non-cristatellus)noncristatellus vs. Tibet (Semi-Urban)	Coyote (Rural) vs. Venezuela (Rural)	7.40146	1.9007e-13	3.48513e-09	0.001
Maricao (Rural) (non-cristatellus)noncristatellus vs. Tibet (Urban)	Coyote (Rural) vs. Venezuela (Rural)	3.37001	0.000764491	1	0.001
Maricao (Rural) (non-cristatellus)noncristatellus vs. USA (Urban)	Coyote (Rural) vs. Venezuela (Rural)	10.638	0	0	0.001
Maricao (Rural) (non-cristatellus)noncristatellus vs. Venezuela (Rural)	Coyote (Rural) vs. Venezuela (Rural)	15.9367	0	0	0.001
Maricao (Rural) (non-cristatellus)noncristatellus vs. Yaounde (Urban)	Coyote (Rural) vs. Venezuela (Rural)	6.32491	2.92871e-10	5.37008e-06	0.001
Maricao (Rural) vs. Coyote (Rural)	Coyote (Rural) vs. Venezuela (Rural)	19.7953	0	0	0.001
Maricao (Rural) vs. Coyote (Urban)	Coyote (Rural) vs. Venezuela (Rural)	7.44899	1.32117e-13	2.42249e-09	0.001
Maricao (Rural) vs. Maricao (Rural)	Coyote (Rural) vs. Venezuela (Rural)	-66.0679	0	0	0.001
Maricao (Rural) vs. Mayaguez (Urban)	Coyote (Rural) vs. Venezuela (Rural)	-55.9812	0	0	0.001
Maricao (Rural) vs. Mbalmayo (Semi-Urban)	Coyote (Rural) vs. Venezuela (Rural)	8.79824	0	0	0.001
Maricao (Rural) vs. all	Coyote (Rural) vs. Venezuela (Rural)	4.04012	5.5336e-05	1	0.001
Maricao (Rural) vs. all	Coyote (Rural) vs. Venezuela (Rural)	-5.85762	5.24498e-09	9.61719e-05	0.001
Maricao (Rural) vs. Sparrow (Urban)	Coyote (Rural) vs. Venezuela (Rural)	9.18577	0	0	0.001
Maricao (Rural) vs. Tibet (Rural)	Coyote (Rural) vs. Venezuela (Rural)	8.00184	1.9984e-15	3.66427e-11	0.001
Maricao (Rural) vs. Tibet (Semi-Urban)	Coyote (Rural) vs. Venezuela (Rural)	5.97004	2.74951e-09	5.0415e-05	0.001
Maricao (Rural) vs. Tibet (Urban)	Coyote (Rural) vs. Venezuela (Rural)	1.97793	0.0480581	1	0.053
Maricao (Rural) vs. USA (Urban)	Coyote (Rural) vs. Venezuela (Rural)	-0.888643	0.374217	1	0.38
Maricao (Rural) vs. Venezuela (Rural)	Coyote (Rural) vs. Venezuela (Rural)	13.1254	0	0	0.001
Maricao (Rural) vs. Yaounde (Urban)	Coyote (Rural) vs. Venezuela (Rural)	2.37989	0.0173809	1	0.022
Mayaguez (Urban) vs. Mayaguez (Urban)	Coyote (Rural) vs. Venezuela (Rural)	-31.9822	6.19008e-182	1.13501e-177	0.001
Mbalmayo (Semi-Urban) vs. Mbalmayo (Semi-Urban)	Coyote (Rural) vs. Venezuela (Rural)	-80.9587	0	0	0.001
Ngoantet (Rural) vs. Coyote (Rural)	Coyote (Rural) vs. Venezuela (Rural)	19.0243	0	0	0.001
Ngoantet (Rural) vs. Coyote (Urban)	Coyote (Rural) vs. Venezuela (Rural)	-3.5884	0.000338514	1	0.001
Ngoantet (Rural) vs. Malawi (Rural)	Coyote (Rural) vs. Venezuela (Rural)	-116.32	0	0	0.001
Ngoantet (Rural) vs. Maricao (Rural)	Coyote (Rural) vs. Venezuela (Rural)	17.5033	0	0	0.001
Ngoantet (Rural) vs. Maricao (Rural) (non-cristatellus)noncristatellus	Coyote (Rural) vs. Venezuela (Rural)	20.0767	0	0	0.001
Ngoantet (Rural) vs. Mayaguez (Urban)	Coyote (Rural) vs. Venezuela (Rural)	7.05051	2.24487e-12	4.1162e-08	0.001
Ngoantet (Rural) vs. Mbalmayo (Semi-Urban)	Coyote (Rural) vs. Venezuela (Rural)	-98.3355	0	0	0.001
Ngoantet (Rural) vs. all	Coyote (Rural) vs. Venezuela (Rural)	-72.7262	0	0	0.001
Ngoantet (Rural) vs. all	Coyote (Rural) vs. Venezuela (Rural)	-51.7056	0	0	0.001
Ngoantet (Rural) vs. Ngoantet (Rural)	Coyote (Rural) vs. Venezuela (Rural)	-90.2422	0	0	0.001
Ngoantet (Rural) vs. Sparrow (Rural)	Coyote (Rural) vs. Venezuela (Rural)	24.7489	0	0	0.001
Ngoantet (Rural) vs. Sparrow (Urban)	Coyote (Rural) vs. Venezuela (Rural)	33.2442	0	0	0.001
Ngoantet (Rural) vs. Tibet (Rural)	Coyote (Rural) vs. Venezuela (Rural)	-77.1327	0	0	0.001
Ngoantet (Rural) vs. Tibet (Semi-Urban)	Coyote (Rural) vs. Venezuela (Rural)	-61.1158	0	0	0.001
Ngoantet (Rural) vs. Tibet (Urban)	Coyote (Rural) vs. Venezuela (Rural)	-54.788	0	0	0.001
Ngoantet (Rural) vs. USA (Urban)	Coyote (Rural) vs. Venezuela (Rural)	-63.1015	0	0	0.001
Ngoantet (Rural) vs. Venezuela (Rural)	Coyote (Rural) vs. Venezuela (Rural)	-92.4062	0	0	0.001
Ngoantet (Rural) vs. Yaounde (Urban)	Coyote (Rural) vs. Venezuela (Rural)	-81.1887	0	0	0.001
Sparrow (Rural) vs. Coyote (Rural)	Coyote (Rural) vs. Venezuela (Rural)	18.8141	0	0	0.001
Sparrow (Rural) vs. Coyote (Urban)	Coyote (Rural) vs. Venezuela (Rural)	8.66942	0	0	0.001
Sparrow (Rural) vs. Maricao (Rural)	Coyote (Rural) vs. Venezuela (Rural)	14.5496	0	0	0.001
Sparrow (Rural) vs. Mayaguez (Urban)	Coyote (Rural) vs. Venezuela (Rural)	8.38796	2.22045e-16	4.07141e-12	0.001
Sparrow (Rural) vs. Mbalmayo (Semi-Urban)	Coyote (Rural) vs. Venezuela (Rural)	12.6787	0	0	0.001
Sparrow (Rural) vs. all	Coyote (Rural) vs. Venezuela (Rural)	5.63038	2.04348e-08	0.000374693	0.001
Sparrow (Rural) vs. all	Coyote (Rural) vs. Venezuela (Rural)	14.2712	0	0	0.001
Sparrow (Rural) vs. Sparrow (Rural)	Coyote (Rural) vs. Venezuela (Rural)	-26.4538	2.48308e-134	4.55297e-130	0.001
Sparrow (Rural) vs. Sparrow (Urban)	Coyote (Rural) vs. Venezuela (Rural)	-29.6951	1.80901e-170	3.31701e-166	0.001
Sparrow (Rural) vs. Tibet (Rural)	Coyote (Rural) vs. Venezuela (Rural)	8.212	4.44089e-16	8.14282e-12	0.001
Sparrow (Rural) vs. Tibet (Semi-Urban)	Coyote (Rural) vs. Venezuela (Rural)	8.13885	6.66134e-16	1.22142e-11	0.001
Sparrow (Rural) vs. Tibet (Urban)	Coyote (Rural) vs. Venezuela (Rural)	7.86534	5.77316e-15	1.05857e-10	0.001
Sparrow (Rural) vs. USA (Urban)	Coyote (Rural) vs. Venezuela (Rural)	42.2746	0	0	0.001
Sparrow (Rural) vs. Venezuela (Rural)	Coyote (Rural) vs. Venezuela (Rural)	16.1643	0	0	0.001
Sparrow (Rural) vs. Yaounde (Urban)	Coyote (Rural) vs. Venezuela (Rural)	14.8471	0	0	0.001
Sparrow (Urban) vs. Sparrow (Urban)	Coyote (Rural) vs. Venezuela (Rural)	-30.8498	3.69203e-182	6.7697e-178	0.001
Tibet (Rural) vs. Tibet (Rural)	Coyote (Rural) vs. Venezuela (Rural)	-51.4829	0	0	0.001
Tibet (Semi-Urban) vs. Coyote (Rural)	Coyote (Rural) vs. Venezuela (Rural)	6.56611	6.31422e-11	1.15777e-06	0.001
Tibet (Semi-Urban) vs. Coyote (Urban)	Coyote (Rural) vs. Venezuela (Rural)	-1.37558	0.169102	1	0.184
Tibet (Semi-Urban) vs. Mayaguez (Urban)	Coyote (Rural) vs. Venezuela (Rural)	1.18033	0.238007	1	0.237
Tibet (Semi-Urban) vs. Mbalmayo (Semi-Urban)	Coyote (Rural) vs. Venezuela (Rural)	-51.5789	0	0	0.001
Tibet (Semi-Urban) vs. all	Coyote (Rural) vs. Venezuela (Rural)	-33.045	1.45828e-191	2.6739e-187	0.001
Tibet (Semi-Urban) vs. all	Coyote (Rural) vs. Venezuela (Rural)	-37.0273	6.07261e-233	1.11347e-228	0.001
Tibet (Semi-Urban) vs. Sparrow (Urban)	Coyote (Rural) vs. Venezuela (Rural)	11.4408	0	0	0.001
Tibet (Semi-Urban) vs. Tibet (Rural)	Coyote (Rural) vs. Venezuela (Rural)	-44.5349	4.20996e-303	7.71939e-299	0.001
Tibet (Semi-Urban) vs. Tibet (Semi-Urban)	Coyote (Rural) vs. Venezuela (Rural)	-27.901	5.37843e-145	9.86188e-141	0.001
Tibet (Semi-Urban) vs. Tibet (Urban)	Coyote (Rural) vs. Venezuela (Rural)	-29.1992	7.00531e-157	1.28449e-152	0.001
Tibet (Semi-Urban) vs. USA (Urban)	Coyote (Rural) vs. Venezuela (Rural)	-56.7077	0	0	0.001
Tibet (Semi-Urban) vs. Venezuela (Rural)	Coyote (Rural) vs. Venezuela (Rural)	-55.9973	0	0	0.001
Tibet (Semi-Urban) vs. Yaounde (Urban)	Coyote (Rural) vs. Venezuela (Rural)	-52.0163	0	0	0.001
Tibet (Urban) vs. Tibet (Urban)	Coyote (Rural) vs. Venezuela (Rural)	-22.2591	2.94815e-98	5.40573e-94	0.001
USA (Urban) vs. Coyote (Rural)	Coyote (Rural) vs. Venezuela (Rural)	10.1706	0	0	0.001
USA (Urban) vs. Coyote (Urban)	Coyote (Rural) vs. Venezuela (Rural)	-0.689578	0.490497	1	0.503
USA (Urban) vs. Mayaguez (Urban)	Coyote (Rural) vs. Venezuela (Rural)	-12.2145	9.4978e-34	1.74152e-29	0.001
USA (Urban) vs. Mbalmayo (Semi-Urban)	Coyote (Rural) vs. Venezuela (Rural)	-66.5625	0	0	0.001
USA (Urban) vs. all	Coyote (Rural) vs. Venezuela (Rural)	-39.1465	3.05121e-269	5.59469e-265	0.001
USA (Urban) vs. all	Coyote (Rural) vs. Venezuela (Rural)	-115.647	0	0	0.001
USA (Urban) vs. Sparrow (Urban)	Coyote (Rural) vs. Venezuela (Rural)	55.6345	0	0	0.001
USA (Urban) vs. Tibet (Rural)	Coyote (Rural) vs. Venezuela (Rural)	-48.4669	0	0	0.001
USA (Urban) vs. Tibet (Urban)	Coyote (Rural) vs. Venezuela (Rural)	-88.652	0	0	0.001
USA (Urban) vs. USA (Urban)	Coyote (Rural) vs. Venezuela (Rural)	-134.344	0	0	0.001
USA (Urban) vs. Venezuela (Rural)	Coyote (Rural) vs. Venezuela (Rural)	-81.961	0	0	0.001
Venezuela (Rural) vs. Venezuela (Rural)	Coyote (Rural) vs. Venezuela (Rural)	-102.048	0	0	0.001
Yaounde (Urban) vs. Coyote (Rural)	Coyote (Rural) vs. Venezuela (Rural)	6.60561	4.5618e-11	8.36451e-07	0.001
Yaounde (Urban) vs. Coyote (Urban)	Coyote (Rural) vs. Venezuela (Rural)	-3.64998	0.000268201	1	0.002
Yaounde (Urban) vs. Mayaguez (Urban)	Coyote (Rural) vs. Venezuela (Rural)	-1.80752	0.0708142	1	0.066
Yaounde (Urban) vs. Mbalmayo (Semi-Urban)	Coyote (Rural) vs. Venezuela (Rural)	-80.7964	0	0	0.001
Yaounde (Urban) vs. all	Coyote (Rural) vs. Venezuela (Rural)	-38.7096	1.28482e-247	2.35585e-243	0.001
Yaounde (Urban) vs. all	Coyote (Rural) vs. Venezuela (Rural)	-62.8976	0	0	0.001
Yaounde (Urban) vs. Sparrow (Urban)	Coyote (Rural) vs. Venezuela (Rural)	19.4798	0	0	0.001
Yaounde (Urban) vs. Tibet (Rural)	Coyote (Rural) vs. Venezuela (Rural)	-50.4658	0	0	0.001
Yaounde (Urban) vs. Tibet (Urban)	Coyote (Rural) vs. Venezuela (Rural)	-50.4132	0	0	0.001
Yaounde (Urban) vs. USA (Urban)	Coyote (Rural) vs. Venezuela (Rural)	-80.8283	0	0	0.001
Yaounde (Urban) vs. Venezuela (Rural)	Coyote (Rural) vs. Venezuela (Rural)	-85.1041	0	0	0.001
Yaounde (Urban) vs. Yaounde (Urban)	Coyote (Rural) vs. Venezuela (Rural)	-75.769	0	0	0.001
All between population	Coyote (Urban) vs. Coyote (Urban)	9.5025	0	0	0.001
All within population	Coyote (Urban) vs. Coyote (Urban)	-4.49	7.14444e-06	0.131	0.001
Coyote (Rural) vs. Coyote (Rural)	Coyote (Urban) vs. Coyote (Urban)	-1.68347	0.0925119	1	0.1
Malawi (Rural) vs. Malawi (Rural)	Coyote (Urban) vs. Coyote (Urban)	-11.5934	8.35701e-30	1.53234e-25	0.001
Maricao (Rural) (non-cristatellus)noncristatellus vs. Maricao (Rural) (non-cristatellus)noncristatellus	Coyote (Urban) vs. Coyote (Urban)	1.10716	0.268747	1	0.264
Maricao (Rural) vs. Maricao (Rural)	Coyote (Urban) vs. Coyote (Urban)	1.03573	0.300744	1	0.307
Ngoantet (Rural) vs. Ngoantet (Rural)	Coyote (Urban) vs. Coyote (Urban)	-2.59628	0.00946924	1	0.005
Sparrow (Rural) vs. Sparrow (Rural)	Coyote (Urban) vs. Coyote (Urban)	1.92706	0.054929	1	0.051
Tibet (Semi-Urban) vs. Tibet (Semi-Urban)	Coyote (Urban) vs. Coyote (Urban)	0.0560241	0.95548	1	0.956
USA (Urban) vs. USA (Urban)	Coyote (Urban) vs. Coyote (Urban)	-6.29019	3.22148e-10	5.9069e-06	0.001
Yaounde (Urban) vs. Yaounde (Urban)	Coyote (Urban) vs. Coyote (Urban)	0.404356	0.686144	1	0.688
All between population	Coyote (Urban) vs. Mayaguez (Urban)	-6.28775	3.22708e-10	5.91718e-06	0.001
All within population	Coyote (Urban) vs. Mayaguez (Urban)	-24.8735	2.03169e-135	3.72531e-131	0.001
Coyote (Rural) vs. Coyote (Rural)	Coyote (Urban) vs. Mayaguez (Urban)	-15.4722	4.96306e-50	9.10027e-46	0.001
Coyote (Rural) vs. Coyote (Urban)	Coyote (Urban) vs. Mayaguez (Urban)	-12.1417	1.41631e-30	2.59694e-26	0.001
Coyote (Rural) vs. Mayaguez (Urban)	Coyote (Urban) vs. Mayaguez (Urban)	0.352078	0.7249	1	0.735
Coyote (Rural) vs. Mbalmayo (Semi-Urban)	Coyote (Urban) vs. Mayaguez (Urban)	4.98102	7.25872e-07	0.0133096	0.001
Coyote (Rural) vs. all	Coyote (Urban) vs. Mayaguez (Urban)	3.08646	0.00206693	1	0.005
Coyote (Rural) vs. Sparrow (Urban)	Coyote (Urban) vs. Mayaguez (Urban)	3.17736	0.00150407	1	0.013
Coyote (Rural) vs. Tibet (Rural)	Coyote (Urban) vs. Mayaguez (Urban)	5.89738	6.6987e-09	0.000122827	0.001
Coyote (Rural) vs. Tibet (Urban)	Coyote (Urban) vs. Mayaguez (Urban)	-0.0190962	0.984772	1	0.99
Coyote (Rural) vs. Venezuela (Rural)	Coyote (Urban) vs. Mayaguez (Urban)	-1.45481	0.145873	1	0.146
Coyote (Urban) vs. Coyote (Urban)	Coyote (Urban) vs. Mayaguez (Urban)	-10.8416	2.31356e-20	4.24215e-16	0.001
Coyote (Urban) vs. Mbalmayo (Semi-Urban)	Coyote (Urban) vs. Mayaguez (Urban)	-2.0531	0.0409076	1	0.043
Coyote (Urban) vs. Sparrow (Urban)	Coyote (Urban) vs. Mayaguez (Urban)	3.78738	0.000168465	1	0.001
Coyote (Urban) vs. Venezuela (Rural)	Coyote (Urban) vs. Mayaguez (Urban)	-3.25159	0.00122868	1	0.001
Malawi (Rural) vs. Coyote (Rural)	Coyote (Urban) vs. Mayaguez (Urban)	3.77061	0.000166091	1	0.002
Malawi (Rural) vs. Coyote (Urban)	Coyote (Urban) vs. Mayaguez (Urban)	-2.53698	0.0114185	1	0.015
Malawi (Rural) vs. Malawi (Rural)	Coyote (Urban) vs. Mayaguez (Urban)	-44.4173	1.96486e-277	3.60277e-273	0.001
Malawi (Rural) vs. Maricao (Rural)	Coyote (Urban) vs. Mayaguez (Urban)	14.6212	0	0	0.001
Malawi (Rural) vs. Mayaguez (Urban)	Coyote (Urban) vs. Mayaguez (Urban)	5.77515	1.20152e-08	0.00022031	0.001
Malawi (Rural) vs. Mbalmayo (Semi-Urban)	Coyote (Urban) vs. Mayaguez (Urban)	-31.4728	4.88579e-160	8.95859e-156	0.001
Malawi (Rural) vs. all	Coyote (Urban) vs. Mayaguez (Urban)	-24.9872	1.2496e-76	2.29127e-72	0.001
Malawi (Rural) vs. all	Coyote (Urban) vs. Mayaguez (Urban)	-19.5131	3.65856e-75	6.70833e-71	0.001
Malawi (Rural) vs. Sparrow (Rural)	Coyote (Urban) vs. Mayaguez (Urban)	13.1668	0	0	0.001
Malawi (Rural) vs. Sparrow (Urban)	Coyote (Urban) vs. Mayaguez (Urban)	16.2445	0	0	0.001
Malawi (Rural) vs. Tibet (Rural)	Coyote (Urban) vs. Mayaguez (Urban)	-30.5246	7.56353e-119	1.38685e-114	0.001
Malawi (Rural) vs. Tibet (Semi-Urban)	Coyote (Urban) vs. Mayaguez (Urban)	-20.3852	1.23842e-68	2.27077e-64	0.001
Malawi (Rural) vs. Tibet (Urban)	Coyote (Urban) vs. Mayaguez (Urban)	-24.7159	2.75077e-90	5.04381e-86	0.001
Malawi (Rural) vs. USA (Urban)	Coyote (Urban) vs. Mayaguez (Urban)	-21.5286	5.84317e-101	1.0714e-96	0.001
Malawi (Rural) vs. Venezuela (Rural)	Coyote (Urban) vs. Mayaguez (Urban)	-27.7352	5.38383e-145	9.87179e-141	0.001
Malawi (Rural) vs. Yaounde (Urban)	Coyote (Urban) vs. Mayaguez (Urban)	-24.2671	1.26288e-111	2.31562e-107	0.001
Maricao (Rural) (non-cristatellus)noncristatellus vs. Coyote (Rural)	Coyote (Urban) vs. Mayaguez (Urban)	8.44163	0	0	0.001
Maricao (Rural) (non-cristatellus)noncristatellus vs. Coyote (Urban)	Coyote (Urban) vs. Mayaguez (Urban)	5.3212	1.70427e-07	0.00312495	0.001
Maricao (Rural) (non-cristatellus)noncristatellus vs. Malawi (Rural)	Coyote (Urban) vs. Mayaguez (Urban)	16.7166	0	0	0.001
Maricao (Rural) (non-cristatellus)noncristatellus vs. Maricao (Rural)	Coyote (Urban) vs. Mayaguez (Urban)	-18.3243	5.09866e-66	9.3489e-62	0.001
Maricao (Rural) (non-cristatellus)noncristatellus vs. Maricao (Rural) (non-cristatellus)noncristatellus	Coyote (Urban) vs. Mayaguez (Urban)	-18.1742	2.01101e-58	3.6874e-54	0.001
Maricao (Rural) (non-cristatellus)noncristatellus vs. Mayaguez (Urban)	Coyote (Urban) vs. Mayaguez (Urban)	-14.6788	1.81041e-39	3.31957e-35	0.001
Maricao (Rural) (non-cristatellus)noncristatellus vs. Mbalmayo (Semi-Urban)	Coyote (Urban) vs. Mayaguez (Urban)	5.5285	4.46252e-08	0.000818248	0.001
Maricao (Rural) (non-cristatellus)noncristatellus vs. all	Coyote (Urban) vs. Mayaguez (Urban)	3.14959	0.00185991	1	0.002
Maricao (Rural) (non-cristatellus)noncristatellus vs. all	Coyote (Urban) vs. Mayaguez (Urban)	-1.97129	0.0490177	1	0.064
Maricao (Rural) (non-cristatellus)noncristatellus vs. Sparrow (Rural)	Coyote (Urban) vs. Mayaguez (Urban)	12.3653	0	0	0.001
Maricao (Rural) (non-cristatellus)noncristatellus vs. Sparrow (Urban)	Coyote (Urban) vs. Mayaguez (Urban)	4.86334	1.27111e-06	0.023307	0.001
Maricao (Rural) (non-cristatellus)noncristatellus vs. Tibet (Rural)	Coyote (Urban) vs. Mayaguez (Urban)	5.9236	7.60438e-09	0.000139434	0.001
Maricao (Rural) (non-cristatellus)noncristatellus vs. Tibet (Semi-Urban)	Coyote (Urban) vs. Mayaguez (Urban)	4.85806	1.79967e-06	0.0329988	0.001
Maricao (Rural) (non-cristatellus)noncristatellus vs. Tibet (Urban)	Coyote (Urban) vs. Mayaguez (Urban)	0.900101	0.368692	1	0.383
Maricao (Rural) (non-cristatellus)noncristatellus vs. USA (Urban)	Coyote (Urban) vs. Mayaguez (Urban)	0.521539	0.602008	1	0.602
Maricao (Rural) (non-cristatellus)noncristatellus vs. Venezuela (Rural)	Coyote (Urban) vs. Mayaguez (Urban)	7.9161	5.32907e-15	9.77138e-11	0.001
Maricao (Rural) (non-cristatellus)noncristatellus vs. Yaounde (Urban)	Coyote (Urban) vs. Mayaguez (Urban)	1.21415	0.224977	1	0.247
Maricao (Rural) vs. Coyote (Rural)	Coyote (Urban) vs. Mayaguez (Urban)	8.64733	0	0	0.001
Maricao (Rural) vs. Coyote (Urban)	Coyote (Urban) vs. Mayaguez (Urban)	3.55165	0.000424349	1	0.002
Maricao (Rural) vs. Maricao (Rural)	Coyote (Urban) vs. Mayaguez (Urban)	-17.8683	1.5848e-58	2.90588e-54	0.001
Maricao (Rural) vs. Mayaguez (Urban)	Coyote (Urban) vs. Mayaguez (Urban)	-16.4157	1.53091e-47	2.80707e-43	0.001
Maricao (Rural) vs. Mbalmayo (Semi-Urban)	Coyote (Urban) vs. Mayaguez (Urban)	3.63305	0.000297691	1	0.001
Maricao (Rural) vs. all	Coyote (Urban) vs. Mayaguez (Urban)	2.22941	0.0267363	1	0.029
Maricao (Rural) vs. all	Coyote (Urban) vs. Mayaguez (Urban)	-4.01292	6.48809e-05	1	0.001
Maricao (Rural) vs. Sparrow (Urban)	Coyote (Urban) vs. Mayaguez (Urban)	1.55514	0.120098	1	0.119
Maricao (Rural) vs. Tibet (Rural)	Coyote (Urban) vs. Mayaguez (Urban)	5.43376	1.00275e-07	0.00183865	0.001
Maricao (Rural) vs. Tibet (Semi-Urban)	Coyote (Urban) vs. Mayaguez (Urban)	3.03228	0.00259825	1	0.005
Maricao (Rural) vs. Tibet (Urban)	Coyote (Urban) vs. Mayaguez (Urban)	-0.35208	0.724979	1	0.735
Maricao (Rural) vs. USA (Urban)	Coyote (Urban) vs. Mayaguez (Urban)	-2.48889	0.0128347	1	0.018
Maricao (Rural) vs. Venezuela (Rural)	Coyote (Urban) vs. Mayaguez (Urban)	4.63127	3.97432e-06	0.0728731	0.001
Maricao (Rural) vs. Yaounde (Urban)	Coyote (Urban) vs. Mayaguez (Urban)	-0.904515	0.365923	1	0.376
Mayaguez (Urban) vs. Mayaguez (Urban)	Coyote (Urban) vs. Mayaguez (Urban)	-15.2129	1.08792e-31	1.99482e-27	0.001
Mbalmayo (Semi-Urban) vs. Mbalmayo (Semi-Urban)	Coyote (Urban) vs. Mayaguez (Urban)	-26.9437	5.45384e-83	1.00002e-78	0.001
Ngoantet (Rural) vs. Coyote (Rural)	Coyote (Urban) vs. Mayaguez (Urban)	4.22066	2.48796e-05	0.456192	0.001
Ngoantet (Rural) vs. Coyote (Urban)	Coyote (Urban) vs. Mayaguez (Urban)	-2.19861	0.0281662	1	0.026
Ngoantet (Rural) vs. Malawi (Rural)	Coyote (Urban) vs. Mayaguez (Urban)	-27.6722	2.75819e-155	5.05742e-151	0.001
Ngoantet (Rural) vs. Maricao (Rural)	Coyote (Urban) vs. Mayaguez (Urban)	5.38676	7.78052e-08	0.00142664	0.001
Ngoantet (Rural) vs. Maricao (Rural) (non-cristatellus)noncristatellus	Coyote (Urban) vs. Mayaguez (Urban)	7.57467	5.01821e-14	9.20139e-10	0.001
Ngoantet (Rural) vs. Mayaguez (Urban)	Coyote (Urban) vs. Mayaguez (Urban)	1.87202	0.061536	1	0.063
Ngoantet (Rural) vs. Mbalmayo (Semi-Urban)	Coyote (Urban) vs. Mayaguez (Urban)	-23.8906	2.67656e-109	4.90774e-105	0.001
Ngoantet (Rural) vs. all	Coyote (Urban) vs. Mayaguez (Urban)	-20.2953	6.71766e-64	1.23175e-59	0.001
Ngoantet (Rural) vs. all	Coyote (Urban) vs. Mayaguez (Urban)	-14.0957	4.63869e-43	8.5055e-39	0.001
Ngoantet (Rural) vs. Ngoantet (Rural)	Coyote (Urban) vs. Mayaguez (Urban)	-21.277	6.9783e-94	1.27954e-89	0.001
Ngoantet (Rural) vs. Sparrow (Rural)	Coyote (Urban) vs. Mayaguez (Urban)	18.7302	0	0	0.001
Ngoantet (Rural) vs. Sparrow (Urban)	Coyote (Urban) vs. Mayaguez (Urban)	19.6158	0	0	0.001
Ngoantet (Rural) vs. Tibet (Rural)	Coyote (Urban) vs. Mayaguez (Urban)	-21.6867	1.06888e-80	1.95989e-76	0.001
Ngoantet (Rural) vs. Tibet (Semi-Urban)	Coyote (Urban) vs. Mayaguez (Urban)	-16.1465	2.66475e-50	4.88609e-46	0.001
Ngoantet (Rural) vs. Tibet (Urban)	Coyote (Urban) vs. Mayaguez (Urban)	-18.4877	8.99675e-63	1.64964e-58	0.001
Ngoantet (Rural) vs. USA (Urban)	Coyote (Urban) vs. Mayaguez (Urban)	-15.3827	4.67558e-53	8.57315e-49	0.001
Ngoantet (Rural) vs. Venezuela (Rural)	Coyote (Urban) vs. Mayaguez (Urban)	-22.2963	3.57408e-102	6.55343e-98	0.001
Ngoantet (Rural) vs. Yaounde (Urban)	Coyote (Urban) vs. Mayaguez (Urban)	-19.7187	3.02859e-80	5.55322e-76	0.001
Sparrow (Rural) vs. Coyote (Rural)	Coyote (Urban) vs. Mayaguez (Urban)	9.73743	0	0	0.001
Sparrow (Rural) vs. Coyote (Urban)	Coyote (Urban) vs. Mayaguez (Urban)	6.63562	1.33666e-10	2.45091e-06	0.001
Sparrow (Rural) vs. Maricao (Rural)	Coyote (Urban) vs. Mayaguez (Urban)	6.68353	4.13658e-11	7.58483e-07	0.001
Sparrow (Rural) vs. Mayaguez (Urban)	Coyote (Urban) vs. Mayaguez (Urban)	6.32823	8.13629e-10	1.49187e-05	0.001
Sparrow (Rural) vs. Mbalmayo (Semi-Urban)	Coyote (Urban) vs. Mayaguez (Urban)	9.75336	0	0	0.001
Sparrow (Rural) vs. all	Coyote (Urban) vs. Mayaguez (Urban)	4.38907	1.88619e-05	0.345852	0.001
Sparrow (Rural) vs. all	Coyote (Urban) vs. Mayaguez (Urban)	11.2971	0	0	0.001
Sparrow (Rural) vs. Sparrow (Rural)	Coyote (Urban) vs. Mayaguez (Urban)	-6.76897	5.46038e-11	1.00122e-06	0.001
Sparrow (Rural) vs. Sparrow (Urban)	Coyote (Urban) vs. Mayaguez (Urban)	-7.15286	1.48872e-12	2.72971e-08	0.001
Sparrow (Rural) vs. Tibet (Rural)	Coyote (Urban) vs. Mayaguez (Urban)	6.49222	3.80066e-10	6.9689e-06	0.001
Sparrow (Rural) vs. Tibet (Semi-Urban)	Coyote (Urban) vs. Mayaguez (Urban)	6.40969	6.10857e-10	1.12007e-05	0.001
Sparrow (Rural) vs. Tibet (Urban)	Coyote (Urban) vs. Mayaguez (Urban)	6.09932	3.50109e-09	6.41959e-05	0.001
Sparrow (Rural) vs. USA (Urban)	Coyote (Urban) vs. Mayaguez (Urban)	29.3651	0	0	0.001
Sparrow (Rural) vs. Venezuela (Rural)	Coyote (Urban) vs. Mayaguez (Urban)	11.1802	0	0	0.001
Sparrow (Rural) vs. Yaounde (Urban)	Coyote (Urban) vs. Mayaguez (Urban)	11.3447	0	0	0.001
Sparrow (Urban) vs. Sparrow (Urban)	Coyote (Urban) vs. Mayaguez (Urban)	-7.48854	1.36027e-13	2.49419e-09	0.001
Tibet (Rural) vs. Tibet (Rural)	Coyote (Urban) vs. Mayaguez (Urban)	-21.8032	1.37399e-44	2.51934e-40	0.001
Tibet (Semi-Urban) vs. Coyote (Rural)	Coyote (Urban) vs. Mayaguez (Urban)	2.72861	0.00657808	1	0.008
Tibet (Semi-Urban) vs. Coyote (Urban)	Coyote (Urban) vs. Mayaguez (Urban)	-1.79766	0.0739254	1	0.063
Tibet (Semi-Urban) vs. Mayaguez (Urban)	Coyote (Urban) vs. Mayaguez (Urban)	-0.113728	0.909582	1	0.911
Tibet (Semi-Urban) vs. Mbalmayo (Semi-Urban)	Coyote (Urban) vs. Mayaguez (Urban)	-17.3058	1.8297e-45	3.35494e-41	0.001
Tibet (Semi-Urban) vs. all	Coyote (Urban) vs. Mayaguez (Urban)	-14.3985	1.07562e-28	1.97225e-24	0.001
Tibet (Semi-Urban) vs. all	Coyote (Urban) vs. Mayaguez (Urban)	-12.0147	2.93219e-27	5.37646e-23	0.001
Tibet (Semi-Urban) vs. Sparrow (Urban)	Coyote (Urban) vs. Mayaguez (Urban)	8.88797	0	0	0.001
Tibet (Semi-Urban) vs. Tibet (Rural)	Coyote (Urban) vs. Mayaguez (Urban)	-17.6971	1.07215e-39	1.9659e-35	0.001
Tibet (Semi-Urban) vs. Tibet (Semi-Urban)	Coyote (Urban) vs. Mayaguez (Urban)	-14.9721	9.55001e-30	1.75109e-25	0.001
Tibet (Semi-Urban) vs. Tibet (Urban)	Coyote (Urban) vs. Mayaguez (Urban)	-12.69	4.63841e-26	8.50498e-22	0.001
Tibet (Semi-Urban) vs. USA (Urban)	Coyote (Urban) vs. Mayaguez (Urban)	-14.3244	2.69881e-44	4.94853e-40	0.001
Tibet (Semi-Urban) vs. Venezuela (Rural)	Coyote (Urban) vs. Mayaguez (Urban)	-18.5604	5.47232e-56	1.00341e-51	0.001
Tibet (Semi-Urban) vs. Yaounde (Urban)	Coyote (Urban) vs. Mayaguez (Urban)	-17.6843	1.06435e-49	1.9516e-45	0.001
Tibet (Urban) vs. Tibet (Urban)	Coyote (Urban) vs. Mayaguez (Urban)	-11.8288	3.55811e-22	6.52416e-18	0.001
USA (Urban) vs. Coyote (Rural)	Coyote (Urban) vs. Mayaguez (Urban)	0.448792	0.65359	1	0.641
USA (Urban) vs. Coyote (Urban)	Coyote (Urban) vs. Mayaguez (Urban)	-1.77271	0.0764054	1	0.077
USA (Urban) vs. Mayaguez (Urban)	Coyote (Urban) vs. Mayaguez (Urban)	-5.1141	3.404e-07	0.00624158	0.001
USA (Urban) vs. Mbalmayo (Semi-Urban)	Coyote (Urban) vs. Mayaguez (Urban)	-16.5623	5.48783e-60	1.00625e-55	0.001
USA (Urban) vs. all	Coyote (Urban) vs. Mayaguez (Urban)	-13.2141	6.90941e-37	1.26691e-32	0.001
USA (Urban) vs. all	Coyote (Urban) vs. Mayaguez (Urban)	-27.5044	2.86576e-156	5.25465e-152	0.001
USA (Urban) vs. Sparrow (Urban)	Coyote (Urban) vs. Mayaguez (Urban)	24.1635	0	0	0.001
USA (Urban) vs. Tibet (Rural)	Coyote (Urban) vs. Mayaguez (Urban)	-14.2124	1.15363e-43	2.1153e-39	0.001
USA (Urban) vs. Tibet (Urban)	Coyote (Urban) vs. Mayaguez (Urban)	-23.0887	2.65288e-104	4.86432e-100	0.001
USA (Urban) vs. USA (Urban)	Coyote (Urban) vs. Mayaguez (Urban)	-30.9089	4.8872e-206	8.96118e-202	0.001
USA (Urban) vs. Venezuela (Rural)	Coyote (Urban) vs. Mayaguez (Urban)	-19.5898	1.14532e-83	2.10006e-79	0.001
Venezuela (Rural) vs. Venezuela (Rural)	Coyote (Urban) vs. Mayaguez (Urban)	-26.3025	2.14157e-110	3.92679e-106	0.001
Yaounde (Urban) vs. Coyote (Rural)	Coyote (Urban) vs. Mayaguez (Urban)	0.67249	0.501369	1	0.488
Yaounde (Urban) vs. Coyote (Urban)	Coyote (Urban) vs. Mayaguez (Urban)	-2.79376	0.00546815	1	0.005
Yaounde (Urban) vs. Mayaguez (Urban)	Coyote (Urban) vs. Mayaguez (Urban)	-2.50386	0.0126942	1	0.017
Yaounde (Urban) vs. Mbalmayo (Semi-Urban)	Coyote (Urban) vs. Mayaguez (Urban)	-21.9647	6.41621e-82	1.17648e-77	0.001
Yaounde (Urban) vs. all	Coyote (Urban) vs. Mayaguez (Urban)	-13.3185	7.10728e-30	1.30319e-25	0.001
Yaounde (Urban) vs. all	Coyote (Urban) vs. Mayaguez (Urban)	-17.9686	7.79346e-61	1.42901e-56	0.001
Yaounde (Urban) vs. Sparrow (Urban)	Coyote (Urban) vs. Mayaguez (Urban)	12.9222	0	0	0.001
Yaounde (Urban) vs. Tibet (Rural)	Coyote (Urban) vs. Mayaguez (Urban)	-17.2561	5.25017e-48	9.62671e-44	0.001
Yaounde (Urban) vs. Tibet (Urban)	Coyote (Urban) vs. Mayaguez (Urban)	-22.8534	5.71393e-70	1.04771e-65	0.001
Yaounde (Urban) vs. USA (Urban)	Coyote (Urban) vs. Mayaguez (Urban)	-19.4601	4.23901e-82	7.77265e-78	0.001
Yaounde (Urban) vs. Venezuela (Rural)	Coyote (Urban) vs. Mayaguez (Urban)	-22.4802	1.10875e-93	2.03301e-89	0.001
Yaounde (Urban) vs. Yaounde (Urban)	Coyote (Urban) vs. Mayaguez (Urban)	-23.2114	1.32458e-81	2.42875e-77	0.001
All between population	Coyote (Urban) vs. Mbalmayo (Semi-Urban)	-7.42775	1.10865e-13	2.03282e-09	0.001
All within population	Coyote (Urban) vs. Mbalmayo (Semi-Urban)	-34.5328	4.14095e-257	7.59285e-253	0.001
Coyote (Rural) vs. Coyote (Rural)	Coyote (Urban) vs. Mbalmayo (Semi-Urban)	-21.2165	8.32116e-88	1.52577e-83	0.001
Coyote (Rural) vs. Coyote (Urban)	Coyote (Urban) vs. Mbalmayo (Semi-Urban)	-16.3907	1.25679e-51	2.30446e-47	0.001
Coyote (Rural) vs. Mayaguez (Urban)	Coyote (Urban) vs. Mbalmayo (Semi-Urban)	4.03164	6.12283e-05	1	0.001
Coyote (Rural) vs. Mbalmayo (Semi-Urban)	Coyote (Urban) vs. Mbalmayo (Semi-Urban)	10.9654	0	0	0.001
Coyote (Rural) vs. all	Coyote (Urban) vs. Mbalmayo (Semi-Urban)	9.43075	0	0	0.001
Coyote (Rural) vs. Sparrow (Urban)	Coyote (Urban) vs. Mbalmayo (Semi-Urban)	9.49728	0	0	0.001
Coyote (Rural) vs. Tibet (Rural)	Coyote (Urban) vs. Mbalmayo (Semi-Urban)	8.57756	0	0	0.001
Coyote (Rural) vs. Tibet (Urban)	Coyote (Urban) vs. Mbalmayo (Semi-Urban)	3.83064	0.000140732	1	0.002
Coyote (Rural) vs. Venezuela (Rural)	Coyote (Urban) vs. Mbalmayo (Semi-Urban)	2.43315	0.0150478	1	0.014
Coyote (Urban) vs. Coyote (Urban)	Coyote (Urban) vs. Mbalmayo (Semi-Urban)	-13.1089	2.61638e-30	4.79739e-26	0.001
Malawi (Rural) vs. Coyote (Rural)	Coyote (Urban) vs. Mbalmayo (Semi-Urban)	12.2657	0	0	0.001
Malawi (Rural) vs. Coyote (Urban)	Coyote (Urban) vs. Mbalmayo (Semi-Urban)	-1.16282	0.245273	1	0.224
Malawi (Rural) vs. Malawi (Rural)	Coyote (Urban) vs. Mbalmayo (Semi-Urban)	-60.7278	0	0	0.001
Malawi (Rural) vs. Maricao (Rural)	Coyote (Urban) vs. Mbalmayo (Semi-Urban)	19.8468	0	0	0.001
Malawi (Rural) vs. Mayaguez (Urban)	Coyote (Urban) vs. Mbalmayo (Semi-Urban)	9.25666	0	0	0.001
Malawi (Rural) vs. Mbalmayo (Semi-Urban)	Coyote (Urban) vs. Mbalmayo (Semi-Urban)	-42.1698	3.77097e-248	6.91445e-244	0.001
Malawi (Rural) vs. all	Coyote (Urban) vs. Mbalmayo (Semi-Urban)	-30.8928	1.32926e-110	2.43733e-106	0.001
Malawi (Rural) vs. all	Coyote (Urban) vs. Mbalmayo (Semi-Urban)	-22.8338	2.53739e-99	4.65256e-95	0.001
Malawi (Rural) vs. Sparrow (Rural)	Coyote (Urban) vs. Mbalmayo (Semi-Urban)	17.0679	0	0	0.001
Malawi (Rural) vs. Sparrow (Urban)	Coyote (Urban) vs. Mbalmayo (Semi-Urban)	23.4162	0	0	0.001
Malawi (Rural) vs. Tibet (Rural)	Coyote (Urban) vs. Mbalmayo (Semi-Urban)	-36.8354	2.81602e-160	5.16346e-156	0.001
Malawi (Rural) vs. Tibet (Semi-Urban)	Coyote (Urban) vs. Mbalmayo (Semi-Urban)	-25.8271	2.56622e-101	4.70543e-97	0.001
Malawi (Rural) vs. Tibet (Urban)	Coyote (Urban) vs. Mbalmayo (Semi-Urban)	-27.6068	4.32035e-111	7.9218e-107	0.001
Malawi (Rural) vs. USA (Urban)	Coyote (Urban) vs. Mbalmayo (Semi-Urban)	-28.3005	7.62799e-171	1.39867e-166	0.001
Malawi (Rural) vs. Venezuela (Rural)	Coyote (Urban) vs. Mbalmayo (Semi-Urban)	-38.09	1.16525e-245	2.1366e-241	0.001
Malawi (Rural) vs. Yaounde (Urban)	Coyote (Urban) vs. Mbalmayo (Semi-Urban)	-32.2773	3.27373e-180	6.00272e-176	0.001
Maricao (Rural) (non-cristatellus)noncristatellus vs. Coyote (Rural)	Coyote (Urban) vs. Mbalmayo (Semi-Urban)	15.7271	0	0	0.001
Maricao (Rural) (non-cristatellus)noncristatellus vs. Coyote (Urban)	Coyote (Urban) vs. Mbalmayo (Semi-Urban)	7.74671	5.01821e-14	9.20139e-10	0.001
Maricao (Rural) (non-cristatellus)noncristatellus vs. Malawi (Rural)	Coyote (Urban) vs. Mbalmayo (Semi-Urban)	20.2883	0	0	0.001
Maricao (Rural) (non-cristatellus)noncristatellus vs. Maricao (Rural)	Coyote (Urban) vs. Mbalmayo (Semi-Urban)	-24.0197	2.67868e-105	4.91163e-101	0.001
Maricao (Rural) (non-cristatellus)noncristatellus vs. Maricao (Rural) (non-cristatellus)noncristatellus	Coyote (Urban) vs. Mbalmayo (Semi-Urban)	-23.6155	2.82339e-90	5.17697e-86	0.001
Maricao (Rural) (non-cristatellus)noncristatellus vs. Mayaguez (Urban)	Coyote (Urban) vs. Mbalmayo (Semi-Urban)	-17.6033	1.03545e-54	1.8986e-50	0.001
Maricao (Rural) (non-cristatellus)noncristatellus vs. Mbalmayo (Semi-Urban)	Coyote (Urban) vs. Mbalmayo (Semi-Urban)	9.69061	0	0	0.001
Maricao (Rural) (non-cristatellus)noncristatellus vs. all	Coyote (Urban) vs. Mbalmayo (Semi-Urban)	4.56825	6.9428e-06	0.127303	0.001
Maricao (Rural) (non-cristatellus)noncristatellus vs. all	Coyote (Urban) vs. Mbalmayo (Semi-Urban)	2.26229	0.0239044	1	0.023
Maricao (Rural) (non-cristatellus)noncristatellus vs. Sparrow (Rural)	Coyote (Urban) vs. Mbalmayo (Semi-Urban)	13.9619	0	0	0.001
Maricao (Rural) (non-cristatellus)noncristatellus vs. Sparrow (Urban)	Coyote (Urban) vs. Mbalmayo (Semi-Urban)	11.4681	0	0	0.001
Maricao (Rural) (non-cristatellus)noncristatellus vs. Tibet (Rural)	Coyote (Urban) vs. Mbalmayo (Semi-Urban)	7.42833	5.46008e-13	1.00116e-08	0.001
Maricao (Rural) (non-cristatellus)noncristatellus vs. Tibet (Semi-Urban)	Coyote (Urban) vs. Mbalmayo (Semi-Urban)	6.80804	3.12943e-11	5.73812e-07	0.001
Maricao (Rural) (non-cristatellus)noncristatellus vs. Tibet (Urban)	Coyote (Urban) vs. Mbalmayo (Semi-Urban)	4.04053	6.25811e-05	1	0.001
Maricao (Rural) (non-cristatellus)noncristatellus vs. USA (Urban)	Coyote (Urban) vs. Mbalmayo (Semi-Urban)	9.17577	0	0	0.001
Maricao (Rural) (non-cristatellus)noncristatellus vs. Venezuela (Rural)	Coyote (Urban) vs. Mbalmayo (Semi-Urban)	13.7147	0	0	0.001
Maricao (Rural) (non-cristatellus)noncristatellus vs. Yaounde (Urban)	Coyote (Urban) vs. Mbalmayo (Semi-Urban)	6.63628	5.02542e-11	9.21462e-07	0.001
Maricao (Rural) vs. Coyote (Rural)	Coyote (Urban) vs. Mbalmayo (Semi-Urban)	16.1572	0	0	0.001
Maricao (Rural) vs. Coyote (Urban)	Coyote (Urban) vs. Mbalmayo (Semi-Urban)	6.73909	4.04514e-11	7.41717e-07	0.001
Maricao (Rural) vs. Maricao (Rural)	Coyote (Urban) vs. Mbalmayo (Semi-Urban)	-23.4376	4.34948e-92	7.9752e-88	0.001
Maricao (Rural) vs. Mayaguez (Urban)	Coyote (Urban) vs. Mbalmayo (Semi-Urban)	-20.9649	4.23446e-72	7.76431e-68	0.001
Maricao (Rural) vs. Mbalmayo (Semi-Urban)	Coyote (Urban) vs. Mbalmayo (Semi-Urban)	8.50302	0	0	0.001
Maricao (Rural) vs. all	Coyote (Urban) vs. Mbalmayo (Semi-Urban)	4.09484	5.27073e-05	0.966442	0.001
Maricao (Rural) vs. all	Coyote (Urban) vs. Mbalmayo (Semi-Urban)	-0.618304	0.536512	1	0.531
Maricao (Rural) vs. Sparrow (Urban)	Coyote (Urban) vs. Mbalmayo (Semi-Urban)	6.23441	5.63199e-10	1.03268e-05	0.001
Maricao (Rural) vs. Tibet (Rural)	Coyote (Urban) vs. Mbalmayo (Semi-Urban)	7.324	1.02407e-12	1.87773e-08	0.001
Maricao (Rural) vs. Tibet (Semi-Urban)	Coyote (Urban) vs. Mbalmayo (Semi-Urban)	5.80858	1.1481e-08	0.000210515	0.001
Maricao (Rural) vs. Tibet (Urban)	Coyote (Urban) vs. Mbalmayo (Semi-Urban)	3.1867	0.00153287	1	0.003
Maricao (Rural) vs. USA (Urban)	Coyote (Urban) vs. Mbalmayo (Semi-Urban)	3.52372	0.000427922	1	0.002
Maricao (Rural) vs. Venezuela (Rural)	Coyote (Urban) vs. Mbalmayo (Semi-Urban)	11.144	0	0	0.001
Maricao (Rural) vs. Yaounde (Urban)	Coyote (Urban) vs. Mbalmayo (Semi-Urban)	4.11996	4.05073e-05	0.742742	0.001
Mayaguez (Urban) vs. Mayaguez (Urban)	Coyote (Urban) vs. Mbalmayo (Semi-Urban)	-16.1258	1.01459e-40	1.86035e-36	0.001
Mbalmayo (Semi-Urban) vs. Mbalmayo (Semi-Urban)	Coyote (Urban) vs. Mbalmayo (Semi-Urban)	-33.7888	1.3794e-121	2.52927e-117	0.001
Ngoantet (Rural) vs. Coyote (Rural)	Coyote (Urban) vs. Mbalmayo (Semi-Urban)	13.4172	0	0	0.001
Ngoantet (Rural) vs. Coyote (Urban)	Coyote (Urban) vs. Mbalmayo (Semi-Urban)	0.131228	0.895621	1	0.889
Ngoantet (Rural) vs. Malawi (Rural)	Coyote (Urban) vs. Mbalmayo (Semi-Urban)	-37.8955	2.27593e-272	4.17314e-268	0.001
Ngoantet (Rural) vs. Maricao (Rural)	Coyote (Urban) vs. Mbalmayo (Semi-Urban)	14.4838	0	0	0.001
Ngoantet (Rural) vs. Maricao (Rural) (non-cristatellus)noncristatellus	Coyote (Urban) vs. Mbalmayo (Semi-Urban)	16.4892	0	0	0.001
Ngoantet (Rural) vs. Mayaguez (Urban)	Coyote (Urban) vs. Mbalmayo (Semi-Urban)	7.01392	4.29434e-12	7.87411e-08	0.001
Ngoantet (Rural) vs. Mbalmayo (Semi-Urban)	Coyote (Urban) vs. Mbalmayo (Semi-Urban)	-32.6585	4.89686e-185	8.97888e-181	0.001
Ngoantet (Rural) vs. all	Coyote (Urban) vs. Mbalmayo (Semi-Urban)	-26.7948	5.2283e-100	9.58661e-96	0.001
Ngoantet (Rural) vs. all	Coyote (Urban) vs. Mbalmayo (Semi-Urban)	-17.2414	2.28133e-62	4.18304e-58	0.001
Ngoantet (Rural) vs. Ngoantet (Rural)	Coyote (Urban) vs. Mbalmayo (Semi-Urban)	-29.2489	6.2283e-167	1.14202e-162	0.001
Ngoantet (Rural) vs. Sparrow (Rural)	Coyote (Urban) vs. Mbalmayo (Semi-Urban)	21.7573	0	0	0.001
Ngoantet (Rural) vs. Sparrow (Urban)	Coyote (Urban) vs. Mbalmayo (Semi-Urban)	28.2266	0	0	0.001
Ngoantet (Rural) vs. Tibet (Rural)	Coyote (Urban) vs. Mbalmayo (Semi-Urban)	-28.1728	3.75661e-123	6.88811e-119	0.001
Ngoantet (Rural) vs. Tibet (Semi-Urban)	Coyote (Urban) vs. Mbalmayo (Semi-Urban)	-21.2328	2.75813e-80	5.05731e-76	0.001
Ngoantet (Rural) vs. Tibet (Urban)	Coyote (Urban) vs. Mbalmayo (Semi-Urban)	-21.77	1.61961e-83	2.96971e-79	0.001
Ngoantet (Rural) vs. USA (Urban)	Coyote (Urban) vs. Mbalmayo (Semi-Urban)	-19.2445	1.03981e-81	1.90659e-77	0.001
Ngoantet (Rural) vs. Venezuela (Rural)	Coyote (Urban) vs. Mbalmayo (Semi-Urban)	-30.1755	4.4901e-176	8.23304e-172	0.001
Ngoantet (Rural) vs. Yaounde (Urban)	Coyote (Urban) vs. Mbalmayo (Semi-Urban)	-26.5776	4.24247e-137	7.77899e-133	0.001
Sparrow (Rural) vs. Coyote (Rural)	Coyote (Urban) vs. Mbalmayo (Semi-Urban)	15.4076	0	0	0.001
Sparrow (Rural) vs. Coyote (Urban)	Coyote (Urban) vs. Mbalmayo (Semi-Urban)	7.67847	1.05915e-13	1.94206e-09	0.001
Sparrow (Rural) vs. Maricao (Rural)	Coyote (Urban) vs. Mbalmayo (Semi-Urban)	11.6081	0	0	0.001
Sparrow (Rural) vs. Mayaguez (Urban)	Coyote (Urban) vs. Mbalmayo (Semi-Urban)	7.48718	3.90354e-13	7.15754e-09	0.001
Sparrow (Rural) vs. Mbalmayo (Semi-Urban)	Coyote (Urban) vs. Mbalmayo (Semi-Urban)	11.2144	0	0	0.001
Sparrow (Rural) vs. all	Coyote (Urban) vs. Mbalmayo (Semi-Urban)	4.95923	1.18668e-06	0.0217589	0.001
Sparrow (Rural) vs. all	Coyote (Urban) vs. Mbalmayo (Semi-Urban)	12.4933	0	0	0.001
Sparrow (Rural) vs. Sparrow (Rural)	Coyote (Urban) vs. Mbalmayo (Semi-Urban)	-8.82698	2.24874e-17	4.12329e-13	0.001
Sparrow (Rural) vs. Sparrow (Urban)	Coyote (Urban) vs. Mbalmayo (Semi-Urban)	-9.40424	2.31149e-20	4.23835e-16	0.001
Sparrow (Rural) vs. Tibet (Rural)	Coyote (Urban) vs. Mbalmayo (Semi-Urban)	7.18818	3.34377e-12	6.13114e-08	0.001
Sparrow (Rural) vs. Tibet (Semi-Urban)	Coyote (Urban) vs. Mbalmayo (Semi-Urban)	7.13814	4.61808e-12	8.46772e-08	0.001
Sparrow (Rural) vs. Tibet (Urban)	Coyote (Urban) vs. Mbalmayo (Semi-Urban)	6.95054	1.52665e-11	2.79926e-07	0.001
Sparrow (Rural) vs. USA (Urban)	Coyote (Urban) vs. Mbalmayo (Semi-Urban)	36.5678	0	0	0.001
Sparrow (Rural) vs. Venezuela (Rural)	Coyote (Urban) vs. Mbalmayo (Semi-Urban)	14.2596	0	0	0.001
Sparrow (Rural) vs. Yaounde (Urban)	Coyote (Urban) vs. Mbalmayo (Semi-Urban)	13.1338	0	0	0.001
Sparrow (Urban) vs. Sparrow (Urban)	Coyote (Urban) vs. Mbalmayo (Semi-Urban)	-9.78849	7.1349e-22	1.30826e-17	0.001
Tibet (Rural) vs. Tibet (Rural)	Coyote (Urban) vs. Mbalmayo (Semi-Urban)	-25.1279	1.19216e-68	2.18594e-64	0.001
Tibet (Semi-Urban) vs. Coyote (Rural)	Coyote (Urban) vs. Mbalmayo (Semi-Urban)	6.44699	2.28552e-10	4.19073e-06	0.001
Tibet (Semi-Urban) vs. Coyote (Urban)	Coyote (Urban) vs. Mbalmayo (Semi-Urban)	0.14381	0.885751	1	0.9
Tibet (Semi-Urban) vs. Mayaguez (Urban)	Coyote (Urban) vs. Mbalmayo (Semi-Urban)	1.82014	0.0697762	1	0.076
Tibet (Semi-Urban) vs. Mbalmayo (Semi-Urban)	Coyote (Urban) vs. Mbalmayo (Semi-Urban)	-21.3104	1.20162e-66	2.20328e-62	0.001
Tibet (Semi-Urban) vs. all	Coyote (Urban) vs. Mbalmayo (Semi-Urban)	-16.1093	4.48607e-40	8.22565e-36	0.001
Tibet (Semi-Urban) vs. all	Coyote (Urban) vs. Mbalmayo (Semi-Urban)	-14.6201	4.3841e-39	8.03869e-35	0.001
Tibet (Semi-Urban) vs. Sparrow (Urban)	Coyote (Urban) vs. Mbalmayo (Semi-Urban)	10.0663	0	0	0.001
Tibet (Semi-Urban) vs. Tibet (Rural)	Coyote (Urban) vs. Mbalmayo (Semi-Urban)	-20.6304	1.44594e-57	2.65128e-53	0.001
Tibet (Semi-Urban) vs. Tibet (Semi-Urban)	Coyote (Urban) vs. Mbalmayo (Semi-Urban)	-14.9067	7.38237e-36	1.35363e-31	0.001
Tibet (Semi-Urban) vs. Tibet (Urban)	Coyote (Urban) vs. Mbalmayo (Semi-Urban)	-13.8768	1.80426e-33	3.30829e-29	0.001
Tibet (Semi-Urban) vs. USA (Urban)	Coyote (Urban) vs. Mbalmayo (Semi-Urban)	-18.549	4.41519e-71	8.09569e-67	0.001
Tibet (Semi-Urban) vs. Venezuela (Rural)	Coyote (Urban) vs. Mbalmayo (Semi-Urban)	-22.6798	2.37299e-79	4.35112e-75	0.001
Tibet (Semi-Urban) vs. Yaounde (Urban)	Coyote (Urban) vs. Mbalmayo (Semi-Urban)	-21.4733	1.71375e-70	3.14233e-66	0.001
Tibet (Urban) vs. Tibet (Urban)	Coyote (Urban) vs. Mbalmayo (Semi-Urban)	-11.7118	2.80902e-25	5.15063e-21	0.001
USA (Urban) vs. Coyote (Rural)	Coyote (Urban) vs. Mbalmayo (Semi-Urban)	7.61085	2.93099e-14	5.37426e-10	0.001
USA (Urban) vs. Coyote (Urban)	Coyote (Urban) vs. Mbalmayo (Semi-Urban)	2.32205	0.0203105	1	0.024
USA (Urban) vs. Mayaguez (Urban)	Coyote (Urban) vs. Mbalmayo (Semi-Urban)	-2.49572	0.0126346	1	0.016
USA (Urban) vs. Mbalmayo (Semi-Urban)	Coyote (Urban) vs. Mbalmayo (Semi-Urban)	-21.1986	1.42448e-95	2.61193e-91	0.001
USA (Urban) vs. all	Coyote (Urban) vs. Mbalmayo (Semi-Urban)	-14.6009	2.492e-44	4.56933e-40	0.001
USA (Urban) vs. all	Coyote (Urban) vs. Mbalmayo (Semi-Urban)	-37.4906	4.62457e-275	8.47961e-271	0.001
USA (Urban) vs. Sparrow (Urban)	Coyote (Urban) vs. Mbalmayo (Semi-Urban)	42.8186	0	0	0.001
USA (Urban) vs. Tibet (Rural)	Coyote (Urban) vs. Mbalmayo (Semi-Urban)	-16.5641	6.65748e-58	1.22072e-53	0.001
USA (Urban) vs. Tibet (Urban)	Coyote (Urban) vs. Mbalmayo (Semi-Urban)	-30.2732	1.74497e-166	3.19957e-162	0.001
USA (Urban) vs. USA (Urban)	Coyote (Urban) vs. Mbalmayo (Semi-Urban)	-42.9804	0	0	0.001
USA (Urban) vs. Venezuela (Rural)	Coyote (Urban) vs. Mbalmayo (Semi-Urban)	-25.9546	3.24616e-143	5.95215e-139	0.001
Venezuela (Rural) vs. Venezuela (Rural)	Coyote (Urban) vs. Mbalmayo (Semi-Urban)	-35.6415	6.50402e-175	1.19258e-170	0.001
Yaounde (Urban) vs. Coyote (Rural)	Coyote (Urban) vs. Mbalmayo (Semi-Urban)	6.51206	9.70868e-11	1.78018e-06	0.001
Yaounde (Urban) vs. Coyote (Urban)	Coyote (Urban) vs. Mbalmayo (Semi-Urban)	-0.415506	0.67795	1	0.678
Yaounde (Urban) vs. Mayaguez (Urban)	Coyote (Urban) vs. Mbalmayo (Semi-Urban)	0.701088	0.483576	1	0.474
Yaounde (Urban) vs. Mbalmayo (Semi-Urban)	Coyote (Urban) vs. Mbalmayo (Semi-Urban)	-28.9857	1.32978e-127	2.43828e-123	0.001
Yaounde (Urban) vs. all	Coyote (Urban) vs. Mbalmayo (Semi-Urban)	-16.1467	1.91981e-43	3.52017e-39	0.001
Yaounde (Urban) vs. all	Coyote (Urban) vs. Mbalmayo (Semi-Urban)	-22.8319	1.83901e-91	3.372e-87	0.001
Yaounde (Urban) vs. Sparrow (Urban)	Coyote (Urban) vs. Mbalmayo (Semi-Urban)	17.2436	0	0	0.001
Yaounde (Urban) vs. Tibet (Rural)	Coyote (Urban) vs. Mbalmayo (Semi-Urban)	-20.8651	1.02325e-67	1.87623e-63	0.001
Yaounde (Urban) vs. Tibet (Urban)	Coyote (Urban) vs. Mbalmayo (Semi-Urban)	-24.3028	2.38598e-83	4.37494e-79	0.001
Yaounde (Urban) vs. USA (Urban)	Coyote (Urban) vs. Mbalmayo (Semi-Urban)	-25.7331	1.8924e-139	3.4699e-135	0.001
Yaounde (Urban) vs. Venezuela (Rural)	Coyote (Urban) vs. Mbalmayo (Semi-Urban)	-29.6422	3.44425e-148	6.31538e-144	0.001
Yaounde (Urban) vs. Yaounde (Urban)	Coyote (Urban) vs. Mbalmayo (Semi-Urban)	-29.5035	8.31267e-120	1.52421e-115	0.001
All between population	Coyote (Urban) vs. all	-9.64729	5.09926e-22	9.35e-18	0.001
All within population	Coyote (Urban) vs. all	-38.4488	0	0	0.001
Coyote (Rural) vs. Coyote (Rural)	Coyote (Urban) vs. all	-23.8957	7.82911e-108	1.43555e-103	0.001
Coyote (Rural) vs. Coyote (Urban)	Coyote (Urban) vs. all	-18.7343	1.20224e-64	2.20443e-60	0.001
Coyote (Rural) vs. Mayaguez (Urban)	Coyote (Urban) vs. all	0.781818	0.434566	1	0.462
Coyote (Rural) vs. Mbalmayo (Semi-Urban)	Coyote (Urban) vs. all	7.70227	2.59792e-14	4.76355e-10	0.001
Coyote (Rural) vs. all	Coyote (Urban) vs. all	5.02839	5.54701e-07	0.010171	0.001
Coyote (Rural) vs. Sparrow (Urban)	Coyote (Urban) vs. all	5.19264	2.22864e-07	0.00408644	0.001
Coyote (Rural) vs. Tibet (Rural)	Coyote (Urban) vs. all	8.36162	4.44089e-16	8.14282e-12	0.001
Coyote (Rural) vs. Tibet (Urban)	Coyote (Urban) vs. all	0.278465	0.780744	1	0.787
Coyote (Rural) vs. Venezuela (Rural)	Coyote (Urban) vs. all	-1.97176	0.0487618	1	0.048
Coyote (Urban) vs. Coyote (Urban)	Coyote (Urban) vs. all	-16.5689	1.44232e-43	2.64463e-39	0.001
Coyote (Urban) vs. Mayaguez (Urban)	Coyote (Urban) vs. all	0.182362	0.855408	1	0.842
Coyote (Urban) vs. Mbalmayo (Semi-Urban)	Coyote (Urban) vs. all	-2.92134	0.00366143	1	0.004
Coyote (Urban) vs. Sparrow (Urban)	Coyote (Urban) vs. all	5.82894	8.47413e-09	0.000155382	0.001
Coyote (Urban) vs. Venezuela (Rural)	Coyote (Urban) vs. all	-4.81669	1.83808e-06	0.0337031	0.001
Malawi (Rural) vs. Coyote (Rural)	Coyote (Urban) vs. all	6.21825	5.71338e-10	1.04761e-05	0.001
Malawi (Rural) vs. Coyote (Urban)	Coyote (Urban) vs. all	-3.76461	0.000179367	1	0.001
Malawi (Rural) vs. Malawi (Rural)	Coyote (Urban) vs. all	-68.524	0	0	0.001
Malawi (Rural) vs. Maricao (Rural)	Coyote (Urban) vs. all	20.7472	0	0	0.001
Malawi (Rural) vs. Mayaguez (Urban)	Coyote (Urban) vs. all	8.36776	2.22045e-16	4.07141e-12	0.001
Malawi (Rural) vs. Mbalmayo (Semi-Urban)	Coyote (Urban) vs. all	-48.4899	1.00729e-299	1.84697e-295	0.001
Malawi (Rural) vs. all	Coyote (Urban) vs. all	-38.1881	7.38858e-144	1.35477e-139	0.001
Malawi (Rural) vs. all	Coyote (Urban) vs. all	-29.7864	3.15697e-154	5.78862e-150	0.001
Malawi (Rural) vs. Sparrow (Rural)	Coyote (Urban) vs. all	18.5597	0	0	0.001
Malawi (Rural) vs. Sparrow (Urban)	Coyote (Urban) vs. all	23.607	0	0	0.001
Malawi (Rural) vs. Tibet (Rural)	Coyote (Urban) vs. all	-46.5293	4.76609e-212	8.7391e-208	0.001
Malawi (Rural) vs. Tibet (Semi-Urban)	Coyote (Urban) vs. all	-31.2641	5.07111e-133	9.29839e-129	0.001
Malawi (Rural) vs. Tibet (Urban)	Coyote (Urban) vs. all	-37.3984	3.58046e-166	6.56514e-162	0.001
Malawi (Rural) vs. USA (Urban)	Coyote (Urban) vs. all	-33.1823	1.65249e-231	3.03001e-227	0.001
Malawi (Rural) vs. Venezuela (Rural)	Coyote (Urban) vs. all	-42.8275	7.00814e-295	1.28501e-290	0.001
Malawi (Rural) vs. Yaounde (Urban)	Coyote (Urban) vs. all	-37.3898	4.8919e-227	8.96979e-223	0.001
Maricao (Rural) (non-cristatellus)noncristatellus vs. Coyote (Rural)	Coyote (Urban) vs. all	12.9766	0	0	0.001
Maricao (Rural) (non-cristatellus)noncristatellus vs. Coyote (Urban)	Coyote (Urban) vs. all	7.66007	8.4821e-14	1.55528e-09	0.001
Maricao (Rural) (non-cristatellus)noncristatellus vs. Malawi (Rural)	Coyote (Urban) vs. all	23.0831	0	0	0.001
Maricao (Rural) (non-cristatellus)noncristatellus vs. Maricao (Rural)	Coyote (Urban) vs. all	-28.2089	8.30312e-137	1.52246e-132	0.001
Maricao (Rural) (non-cristatellus)noncristatellus vs. Maricao (Rural) (non-cristatellus)noncristatellus	Coyote (Urban) vs. all	-27.9434	3.80329e-116	6.97372e-112	0.001
Maricao (Rural) (non-cristatellus)noncristatellus vs. Mayaguez (Urban)	Coyote (Urban) vs. all	-22.419	1.74769e-79	3.20456e-75	0.001
Maricao (Rural) (non-cristatellus)noncristatellus vs. Mbalmayo (Semi-Urban)	Coyote (Urban) vs. all	8.17283	1.11022e-15	2.0357e-11	0.001
Maricao (Rural) (non-cristatellus)noncristatellus vs. all	Coyote (Urban) vs. all	4.4237	1.28523e-05	0.23566	0.001
Maricao (Rural) (non-cristatellus)noncristatellus vs. all	Coyote (Urban) vs. all	-2.63587	0.00852463	1	0.014
Maricao (Rural) (non-cristatellus)noncristatellus vs. Sparrow (Rural)	Coyote (Urban) vs. all	16.7986	0	0	0.001
Maricao (Rural) (non-cristatellus)noncristatellus vs. Sparrow (Urban)	Coyote (Urban) vs. all	7.71701	2.02061e-14	3.70498e-10	0.001
Maricao (Rural) (non-cristatellus)noncristatellus vs. Tibet (Rural)	Coyote (Urban) vs. all	8.18606	2.44249e-15	4.47855e-11	0.001
Maricao (Rural) (non-cristatellus)noncristatellus vs. Tibet (Semi-Urban)	Coyote (Urban) vs. all	6.84756	2.27649e-11	4.17417e-07	0.001
Maricao (Rural) (non-cristatellus)noncristatellus vs. Tibet (Urban)	Coyote (Urban) vs. all	1.5577	0.119955	1	0.126
Maricao (Rural) (non-cristatellus)noncristatellus vs. USA (Urban)	Coyote (Urban) vs. all	1.31052	0.190062	1	0.177
Maricao (Rural) (non-cristatellus)noncristatellus vs. Venezuela (Rural)	Coyote (Urban) vs. all	11.8614	0	0	0.001
Maricao (Rural) (non-cristatellus)noncristatellus vs. Yaounde (Urban)	Coyote (Urban) vs. all	2.1999	0.0280146	1	0.028
Maricao (Rural) vs. Coyote (Rural)	Coyote (Urban) vs. all	13.215	0	0	0.001
Maricao (Rural) vs. Coyote (Urban)	Coyote (Urban) vs. all	5.35752	1.22012e-07	0.00223722	0.001
Maricao (Rural) vs. Maricao (Rural)	Coyote (Urban) vs. all	-27.4979	1.15515e-117	2.11809e-113	0.001
Maricao (Rural) vs. Mayaguez (Urban)	Coyote (Urban) vs. all	-25.2043	3.94084e-95	7.22592e-91	0.001
Maricao (Rural) vs. Mbalmayo (Semi-Urban)	Coyote (Urban) vs. all	5.62427	2.44822e-08	0.000448906	0.001
Maricao (Rural) vs. all	Coyote (Urban) vs. all	3.23874	0.00130797	1	0.001
Maricao (Rural) vs. all	Coyote (Urban) vs. all	-5.79348	9.09613e-09	0.000166787	0.001
Maricao (Rural) vs. Sparrow (Urban)	Coyote (Urban) vs. all	2.63775	0.00841622	1	0.007
Maricao (Rural) vs. Tibet (Rural)	Coyote (Urban) vs. all	7.59937	1.43663e-13	2.6342e-09	0.001
Maricao (Rural) vs. Tibet (Semi-Urban)	Coyote (Urban) vs. all	4.50623	8.19054e-06	0.150182	0.001
Maricao (Rural) vs. Tibet (Urban)	Coyote (Urban) vs. all	-0.17163	0.863797	1	0.88
Maricao (Rural) vs. USA (Urban)	Coyote (Urban) vs. all	-3.43018	0.000606239	1	0.001
Maricao (Rural) vs. Venezuela (Rural)	Coyote (Urban) vs. all	7.30925	4.30989e-13	7.90261e-09	0.001
Maricao (Rural) vs. Yaounde (Urban)	Coyote (Urban) vs. all	-0.991285	0.321742	1	0.338
Mayaguez (Urban) vs. Mayaguez (Urban)	Coyote (Urban) vs. all	-22.836	3.68146e-66	6.75032e-62	0.001
Mbalmayo (Semi-Urban) vs. Mbalmayo (Semi-Urban)	Coyote (Urban) vs. all	-41.2312	1.37011e-154	2.51224e-150	0.001
Ngoantet (Rural) vs. Coyote (Rural)	Coyote (Urban) vs. all	6.9447	4.36229e-12	7.99869e-08	0.001
Ngoantet (Rural) vs. Coyote (Urban)	Coyote (Urban) vs. all	-3.18548	0.00148909	1	0.003
Ngoantet (Rural) vs. Malawi (Rural)	Coyote (Urban) vs. all	-42.7319	0	0	0.001
Ngoantet (Rural) vs. Maricao (Rural)	Coyote (Urban) vs. all	8.64659	0	0	0.001
Ngoantet (Rural) vs. Maricao (Rural) (non-cristatellus)noncristatellus	Coyote (Urban) vs. all	11.8194	0	0	0.001
Ngoantet (Rural) vs. Mayaguez (Urban)	Coyote (Urban) vs. all	3.14418	0.00171376	1	0.002
Ngoantet (Rural) vs. Mbalmayo (Semi-Urban)	Coyote (Urban) vs. all	-36.881	2.14394e-224	3.93113e-220	0.001
Ngoantet (Rural) vs. all	Coyote (Urban) vs. all	-31.2347	6.04131e-124	1.10773e-119	0.001
Ngoantet (Rural) vs. all	Coyote (Urban) vs. all	-21.6238	7.88527e-94	1.44584e-89	0.001
Ngoantet (Rural) vs. Ngoantet (Rural)	Coyote (Urban) vs. all	-32.8656	1.03446e-204	1.89679e-200	0.001
Ngoantet (Rural) vs. Sparrow (Rural)	Coyote (Urban) vs. all	25.6289	0	0	0.001
Ngoantet (Rural) vs. Sparrow (Urban)	Coyote (Urban) vs. all	28.5064	0	0	0.001
Ngoantet (Rural) vs. Tibet (Rural)	Coyote (Urban) vs. all	-33.3371	3.37284e-157	6.18445e-153	0.001
Ngoantet (Rural) vs. Tibet (Semi-Urban)	Coyote (Urban) vs. all	-24.8592	2.79562e-103	5.12605e-99	0.001
Ngoantet (Rural) vs. Tibet (Urban)	Coyote (Urban) vs. all	-28.1957	1.85867e-124	3.40806e-120	0.001
Ngoantet (Rural) vs. USA (Urban)	Coyote (Urban) vs. all	-23.6563	7.27843e-122	1.33457e-117	0.001
Ngoantet (Rural) vs. Venezuela (Rural)	Coyote (Urban) vs. all	-34.4067	4.89201e-221	8.96999e-217	0.001
Ngoantet (Rural) vs. Yaounde (Urban)	Coyote (Urban) vs. all	-30.4214	3.25878e-173	5.97531e-169	0.001
Sparrow (Rural) vs. Coyote (Rural)	Coyote (Urban) vs. all	14.5008	0	0	0.001
Sparrow (Rural) vs. Coyote (Urban)	Coyote (Urban) vs. all	9.04038	0	0	0.001
Sparrow (Rural) vs. Maricao (Rural)	Coyote (Urban) vs. all	10.1361	0	0	0.001
Sparrow (Rural) vs. Mayaguez (Urban)	Coyote (Urban) vs. all	8.64399	2.22045e-16	4.07141e-12	0.001
Sparrow (Rural) vs. Mbalmayo (Semi-Urban)	Coyote (Urban) vs. all	13.2716	0	0	0.001
Sparrow (Rural) vs. all	Coyote (Urban) vs. all	5.95849	6.53029e-09	0.000119739	0.001
Sparrow (Rural) vs. all	Coyote (Urban) vs. all	15.2788	0	0	0.001
Sparrow (Rural) vs. Sparrow (Rural)	Coyote (Urban) vs. all	-10.4285	3.90163e-23	7.15404e-19	0.001
Sparrow (Rural) vs. Sparrow (Urban)	Coyote (Urban) vs. all	-11.0252	4.22848e-27	7.75334e-23	0.001
Sparrow (Rural) vs. Tibet (Rural)	Coyote (Urban) vs. all	8.78509	0	0	0.001
Sparrow (Rural) vs. Tibet (Semi-Urban)	Coyote (Urban) vs. all	8.67969	2.22045e-16	4.07141e-12	0.001
Sparrow (Rural) vs. Tibet (Urban)	Coyote (Urban) vs. all	8.28381	1.55431e-15	2.84999e-11	0.001
Sparrow (Rural) vs. USA (Urban)	Coyote (Urban) vs. all	41.1492	0	0	0.001
Sparrow (Rural) vs. Venezuela (Rural)	Coyote (Urban) vs. all	15.6432	0	0	0.001
Sparrow (Rural) vs. Yaounde (Urban)	Coyote (Urban) vs. all	15.4655	0	0	0.001
Sparrow (Urban) vs. Sparrow (Urban)	Coyote (Urban) vs. all	-11.5387	2.0613e-29	3.7796e-25	0.001
Tibet (Rural) vs. Tibet (Rural)	Coyote (Urban) vs. all	-33.0495	3.61463e-96	6.62779e-92	0.001
Tibet (Semi-Urban) vs. Coyote (Rural)	Coyote (Urban) vs. all	4.22044	2.78311e-05	0.510311	0.001
Tibet (Semi-Urban) vs. Coyote (Urban)	Coyote (Urban) vs. all	-2.44329	0.0150977	1	0.017
Tibet (Semi-Urban) vs. Mayaguez (Urban)	Coyote (Urban) vs. all	0.0237647	0.981055	1	0.983
Tibet (Semi-Urban) vs. Mbalmayo (Semi-Urban)	Coyote (Urban) vs. all	-26.4653	2.0493e-90	3.7576e-86	0.001
Tibet (Semi-Urban) vs. all	Coyote (Urban) vs. all	-21.7705	2.28156e-61	4.18347e-57	0.001
Tibet (Semi-Urban) vs. all	Coyote (Urban) vs. all	-18.3796	4.24773e-56	7.78863e-52	0.001
Tibet (Semi-Urban) vs. Sparrow (Urban)	Coyote (Urban) vs. all	12.0725	0	0	0.001
Tibet (Semi-Urban) vs. Tibet (Rural)	Coyote (Urban) vs. all	-26.8871	4.01702e-82	7.3656e-78	0.001
Tibet (Semi-Urban) vs. Tibet (Semi-Urban)	Coyote (Urban) vs. all	-22.2468	1.18202e-62	2.16735e-58	0.001
Tibet (Semi-Urban) vs. Tibet (Urban)	Coyote (Urban) vs. all	-19.16	4.18889e-54	7.68075e-50	0.001
Tibet (Semi-Urban) vs. USA (Urban)	Coyote (Urban) vs. all	-22.0504	6.38415e-97	1.1706e-92	0.001
Tibet (Semi-Urban) vs. Venezuela (Rural)	Coyote (Urban) vs. all	-28.3688	3.30895e-109	6.0673e-105	0.001
Tibet (Semi-Urban) vs. Yaounde (Urban)	Coyote (Urban) vs. all	-27.0104	1.11156e-97	2.03816e-93	0.001
Tibet (Urban) vs. Tibet (Urban)	Coyote (Urban) vs. all	-17.5915	1.77615e-46	3.25674e-42	0.001
USA (Urban) vs. Coyote (Rural)	Coyote (Urban) vs. all	1.09287	0.274472	1	0.259
USA (Urban) vs. Coyote (Urban)	Coyote (Urban) vs. all	-2.44127	0.0147042	1	0.015
USA (Urban) vs. Mayaguez (Urban)	Coyote (Urban) vs. all	-7.60107	4.11677e-14	7.5485e-10	0.001
USA (Urban) vs. Mbalmayo (Semi-Urban)	Coyote (Urban) vs. all	-25.4875	7.23248e-135	1.32615e-130	0.001
USA (Urban) vs. all	Coyote (Urban) vs. all	-20.1074	2.69182e-77	4.93572e-73	0.001
USA (Urban) vs. all	Coyote (Urban) vs. all	-42.4641	0	0	0.001
USA (Urban) vs. Sparrow (Urban)	Coyote (Urban) vs. all	36.8989	0	0	0.001
USA (Urban) vs. Tibet (Rural)	Coyote (Urban) vs. all	-21.7351	1.74849e-94	3.20603e-90	0.001
USA (Urban) vs. Tibet (Urban)	Coyote (Urban) vs. all	-35.5447	2.89545e-216	5.3091e-212	0.001
USA (Urban) vs. USA (Urban)	Coyote (Urban) vs. all	-47.781	0	0	0.001
USA (Urban) vs. Venezuela (Rural)	Coyote (Urban) vs. all	-30.2055	6.79623e-191	1.24616e-186	0.001
Venezuela (Rural) vs. Venezuela (Rural)	Coyote (Urban) vs. all	-40.5614	8.4636e-209	1.55189e-204	0.001
Yaounde (Urban) vs. Coyote (Rural)	Coyote (Urban) vs. all	1.39885	0.162035	1	0.182
Yaounde (Urban) vs. Coyote (Urban)	Coyote (Urban) vs. all	-4.00206	7.17763e-05	1	0.001
Yaounde (Urban) vs. Mayaguez (Urban)	Coyote (Urban) vs. all	-3.42214	0.000669495	1	0.003
Yaounde (Urban) vs. Mbalmayo (Semi-Urban)	Coyote (Urban) vs. all	-33.8067	2.89846e-159	5.31461e-155	0.001
Yaounde (Urban) vs. all	Coyote (Urban) vs. all	-20.3512	1.61308e-61	2.95774e-57	0.001
Yaounde (Urban) vs. all	Coyote (Urban) vs. all	-27.5878	5.12348e-123	9.39442e-119	0.001
Yaounde (Urban) vs. Sparrow (Urban)	Coyote (Urban) vs. all	18.2536	0	0	0.001
Yaounde (Urban) vs. Tibet (Rural)	Coyote (Urban) vs. all	-26.3479	1.2667e-94	2.32261e-90	0.001
Yaounde (Urban) vs. Tibet (Urban)	Coyote (Urban) vs. all	-34.3393	3.3332e-130	6.11176e-126	0.001
Yaounde (Urban) vs. USA (Urban)	Coyote (Urban) vs. all	-30.0004	6.72769e-186	1.23359e-181	0.001
Yaounde (Urban) vs. Venezuela (Rural)	Coyote (Urban) vs. all	-34.6103	4.63462e-188	8.49804e-184	0.001
Yaounde (Urban) vs. Yaounde (Urban)	Coyote (Urban) vs. all	-35.5942	3.05695e-154	5.60522e-150	0.001
All between population	Coyote (Urban) vs. Sparrow (Urban)	-15.77	5.38125e-56	9.86707e-52	0.001
All within population	Coyote (Urban) vs. Sparrow (Urban)	-55.8179	0	0	0.001
Coyote (Rural) vs. Coyote (Rural)	Coyote (Urban) vs. Sparrow (Urban)	-34.8449	1.2999e-203	2.3835e-199	0.001
Coyote (Rural) vs. Coyote (Urban)	Coyote (Urban) vs. Sparrow (Urban)	-27.4851	5.51385e-124	1.01102e-119	0.001
Coyote (Rural) vs. Mayaguez (Urban)	Coyote (Urban) vs. Sparrow (Urban)	-4.87859	1.24483e-06	0.0228251	0.001
Coyote (Rural) vs. Mbalmayo (Semi-Urban)	Coyote (Urban) vs. Sparrow (Urban)	-2.21825	0.026681	1	0.029
Coyote (Rural) vs. all	Coyote (Urban) vs. Sparrow (Urban)	-4.19101	2.91853e-05	0.535141	0.001
Coyote (Rural) vs. Sparrow (Urban)	Coyote (Urban) vs. Sparrow (Urban)	-0.622429	0.533709	1	0.563
Coyote (Rural) vs. Tibet (Rural)	Coyote (Urban) vs. Sparrow (Urban)	0.702379	0.482628	1	0.506
Coyote (Rural) vs. Tibet (Urban)	Coyote (Urban) vs. Sparrow (Urban)	-6.58244	7.92461e-11	1.45306e-06	0.001
Coyote (Rural) vs. Venezuela (Rural)	Coyote (Urban) vs. Sparrow (Urban)	-9.0125	3.96175e-19	7.26426e-15	0.001
Coyote (Urban) vs. Coyote (Urban)	Coyote (Urban) vs. Sparrow (Urban)	-24.0039	6.49421e-86	1.19078e-81	0.001
Coyote (Urban) vs. Mbalmayo (Semi-Urban)	Coyote (Urban) vs. Sparrow (Urban)	-7.68402	5.41793e-14	9.93432e-10	0.001
Malawi (Rural) vs. Coyote (Rural)	Coyote (Urban) vs. Sparrow (Urban)	-3.99327	6.66002e-05	1	0.001
Malawi (Rural) vs. Coyote (Urban)	Coyote (Urban) vs. Sparrow (Urban)	-8.41488	1.33479e-16	2.44747e-12	0.001
Malawi (Rural) vs. Malawi (Rural)	Coyote (Urban) vs. Sparrow (Urban)	-98.4552	0	0	0.001
Malawi (Rural) vs. Maricao (Rural)	Coyote (Urban) vs. Sparrow (Urban)	6.09769	1.25824e-09	2.3071e-05	0.001
Malawi (Rural) vs. Mayaguez (Urban)	Coyote (Urban) vs. Sparrow (Urban)	-0.0266087	0.978777	1	0.971
Malawi (Rural) vs. Mbalmayo (Semi-Urban)	Coyote (Urban) vs. Sparrow (Urban)	-70.4436	0	0	0.001
Malawi (Rural) vs. all	Coyote (Urban) vs. Sparrow (Urban)	-55.0866	1.12294e-253	2.05902e-249	0.001
Malawi (Rural) vs. all	Coyote (Urban) vs. Sparrow (Urban)	-46.1053	3.27517e-305	6.00536e-301	0.001
Malawi (Rural) vs. Sparrow (Rural)	Coyote (Urban) vs. Sparrow (Urban)	6.66448	3.57163e-11	6.54894e-07	0.001
Malawi (Rural) vs. Sparrow (Urban)	Coyote (Urban) vs. Sparrow (Urban)	8.55449	0	0	0.001
Malawi (Rural) vs. Tibet (Rural)	Coyote (Urban) vs. Sparrow (Urban)	-67.6414	0	0	0.001
Malawi (Rural) vs. Tibet (Semi-Urban)	Coyote (Urban) vs. Sparrow (Urban)	-45.9906	1.66917e-238	3.0606e-234	0.001
Malawi (Rural) vs. Tibet (Urban)	Coyote (Urban) vs. Sparrow (Urban)	-55.3789	3.89161e-292	7.13566e-288	0.001
Malawi (Rural) vs. USA (Urban)	Coyote (Urban) vs. Sparrow (Urban)	-50.1225	0	0	0.001
Malawi (Rural) vs. Venezuela (Rural)	Coyote (Urban) vs. Sparrow (Urban)	-62.1202	0	0	0.001
Malawi (Rural) vs. Yaounde (Urban)	Coyote (Urban) vs. Sparrow (Urban)	-55.0515	0	0	0.001
Maricao (Rural) (non-cristatellus)noncristatellus vs. Coyote (Rural)	Coyote (Urban) vs. Sparrow (Urban)	4.50294	7.07291e-06	0.129689	0.001
Maricao (Rural) (non-cristatellus)noncristatellus vs. Coyote (Urban)	Coyote (Urban) vs. Sparrow (Urban)	1.74847	0.0807762	1	0.059
Maricao (Rural) (non-cristatellus)noncristatellus vs. Malawi (Rural)	Coyote (Urban) vs. Sparrow (Urban)	8.35286	0	0	0.001
Maricao (Rural) (non-cristatellus)noncristatellus vs. Maricao (Rural)	Coyote (Urban) vs. Sparrow (Urban)	-41.8866	1.09039e-255	1.99934e-251	0.001
Maricao (Rural) (non-cristatellus)noncristatellus vs. Maricao (Rural) (non-cristatellus)noncristatellus	Coyote (Urban) vs. Sparrow (Urban)	-41.0966	1.49586e-211	2.74281e-207	0.001
Maricao (Rural) (non-cristatellus)noncristatellus vs. Mayaguez (Urban)	Coyote (Urban) vs. Sparrow (Urban)	-33.6234	9.29874e-154	1.70502e-149	0.001
Maricao (Rural) (non-cristatellus)noncristatellus vs. Mbalmayo (Semi-Urban)	Coyote (Urban) vs. Sparrow (Urban)	-0.602932	0.546676	1	0.572
Maricao (Rural) (non-cristatellus)noncristatellus vs. all	Coyote (Urban) vs. Sparrow (Urban)	-0.0080718	0.993562	1	0.993
Maricao (Rural) (non-cristatellus)noncristatellus vs. all	Coyote (Urban) vs. Sparrow (Urban)	-10.8344	3.57892e-26	6.56231e-22	0.001
Maricao (Rural) (non-cristatellus)noncristatellus vs. Sparrow (Rural)	Coyote (Urban) vs. Sparrow (Urban)	7.04372	3.17146e-12	5.81519e-08	0.001
Maricao (Rural) (non-cristatellus)noncristatellus vs. Sparrow (Urban)	Coyote (Urban) vs. Sparrow (Urban)	0.81433	0.415557	1	0.413
Maricao (Rural) (non-cristatellus)noncristatellus vs. Tibet (Rural)	Coyote (Urban) vs. Sparrow (Urban)	2.29348	0.0221094	1	0.018
Maricao (Rural) (non-cristatellus)noncristatellus vs. Tibet (Semi-Urban)	Coyote (Urban) vs. Sparrow (Urban)	0.943961	0.345508	1	0.353
Maricao (Rural) (non-cristatellus)noncristatellus vs. Tibet (Urban)	Coyote (Urban) vs. Sparrow (Urban)	-4.93431	1.00115e-06	0.018357	0.001
Maricao (Rural) (non-cristatellus)noncristatellus vs. USA (Urban)	Coyote (Urban) vs. Sparrow (Urban)	-10.4231	2.88759e-25	5.29469e-21	0.001
Maricao (Rural) (non-cristatellus)noncristatellus vs. Venezuela (Rural)	Coyote (Urban) vs. Sparrow (Urban)	1.91268	0.0559621	1	0.063
Maricao (Rural) (non-cristatellus)noncristatellus vs. Yaounde (Urban)	Coyote (Urban) vs. Sparrow (Urban)	-6.56115	7.55673e-11	1.3856e-06	0.001
Maricao (Rural) vs. Coyote (Rural)	Coyote (Urban) vs. Sparrow (Urban)	2.81897	0.00486022	1	0.005
Maricao (Rural) vs. Coyote (Urban)	Coyote (Urban) vs. Sparrow (Urban)	-0.478478	0.632439	1	0.638
Maricao (Rural) vs. Maricao (Rural)	Coyote (Urban) vs. Sparrow (Urban)	-40.4723	5.00586e-215	9.17874e-211	0.001
Maricao (Rural) vs. Mayaguez (Urban)	Coyote (Urban) vs. Sparrow (Urban)	-37.1636	4.7003e-177	8.61846e-173	0.001
Maricao (Rural) vs. Mbalmayo (Semi-Urban)	Coyote (Urban) vs. Sparrow (Urban)	-3.34069	0.000861801	1	0.002
Maricao (Rural) vs. all	Coyote (Urban) vs. Sparrow (Urban)	-1.56154	0.118921	1	0.122
Maricao (Rural) vs. all	Coyote (Urban) vs. Sparrow (Urban)	-14.3474	2.07577e-43	3.80612e-39	0.001
Maricao (Rural) vs. Sparrow (Urban)	Coyote (Urban) vs. Sparrow (Urban)	-2.42906	0.0152228	1	0.015
Maricao (Rural) vs. Tibet (Rural)	Coyote (Urban) vs. Sparrow (Urban)	1.38209	0.16736	1	0.181
Maricao (Rural) vs. Tibet (Semi-Urban)	Coyote (Urban) vs. Sparrow (Urban)	-1.60481	0.108962	1	0.099
Maricao (Rural) vs. Tibet (Urban)	Coyote (Urban) vs. Sparrow (Urban)	-7.16189	1.92419e-12	3.52819e-08	0.001
Maricao (Rural) vs. USA (Urban)	Coyote (Urban) vs. Sparrow (Urban)	-14.5179	3.56952e-47	6.54506e-43	0.001
Maricao (Rural) vs. Venezuela (Rural)	Coyote (Urban) vs. Sparrow (Urban)	-1.72662	0.0844119	1	0.098
Maricao (Rural) vs. Yaounde (Urban)	Coyote (Urban) vs. Sparrow (Urban)	-9.74991	8.44741e-22	1.54892e-17	0.001
Mayaguez (Urban) vs. Mayaguez (Urban)	Coyote (Urban) vs. Sparrow (Urban)	-32.5577	6.54614e-127	1.2003e-122	0.001
Mbalmayo (Semi-Urban) vs. Mbalmayo (Semi-Urban)	Coyote (Urban) vs. Sparrow (Urban)	-59.2276	3.34739e-270	6.13778e-266	0.001
Ngoantet (Rural) vs. Coyote (Rural)	Coyote (Urban) vs. Sparrow (Urban)	-2.80987	0.00497752	1	0.004
Ngoantet (Rural) vs. Coyote (Urban)	Coyote (Urban) vs. Sparrow (Urban)	-8.78153	5.2175e-18	9.5668e-14	0.001
Ngoantet (Rural) vs. Malawi (Rural)	Coyote (Urban) vs. Sparrow (Urban)	-62.3554	0	0	0.001
Ngoantet (Rural) vs. Maricao (Rural)	Coyote (Urban) vs. Sparrow (Urban)	-3.15313	0.00163065	1	0.002
Ngoantet (Rural) vs. Maricao (Rural) (non-cristatellus)noncristatellus	Coyote (Urban) vs. Sparrow (Urban)	-0.0193105	0.984595	1	0.98
Ngoantet (Rural) vs. Mayaguez (Urban)	Coyote (Urban) vs. Sparrow (Urban)	-5.1587	2.88995e-07	0.00529902	0.001
Ngoantet (Rural) vs. Mbalmayo (Semi-Urban)	Coyote (Urban) vs. Sparrow (Urban)	-53.6525	0	0	0.001
Ngoantet (Rural) vs. all	Coyote (Urban) vs. Sparrow (Urban)	-45.3059	1.22632e-220	2.24857e-216	0.001
Ngoantet (Rural) vs. all	Coyote (Urban) vs. Sparrow (Urban)	-33.7252	1.49969e-203	2.74983e-199	0.001
Ngoantet (Rural) vs. Ngoantet (Rural)	Coyote (Urban) vs. Sparrow (Urban)	-47.8843	0	0	0.001
Ngoantet (Rural) vs. Sparrow (Rural)	Coyote (Urban) vs. Sparrow (Urban)	10.316	0	0	0.001
Ngoantet (Rural) vs. Sparrow (Urban)	Coyote (Urban) vs. Sparrow (Urban)	10.477	0	0	0.001
Ngoantet (Rural) vs. Tibet (Rural)	Coyote (Urban) vs. Sparrow (Urban)	-48.9754	8.14706e-278	1.49384e-273	0.001
Ngoantet (Rural) vs. Tibet (Semi-Urban)	Coyote (Urban) vs. Sparrow (Urban)	-36.7267	6.06639e-193	1.11233e-188	0.001
Ngoantet (Rural) vs. Tibet (Urban)	Coyote (Urban) vs. Sparrow (Urban)	-42.7413	2.24132e-235	4.10969e-231	0.001
Ngoantet (Rural) vs. USA (Urban)	Coyote (Urban) vs. Sparrow (Urban)	-37.0914	2.11794e-290	3.88345e-286	0.001
Ngoantet (Rural) vs. Venezuela (Rural)	Coyote (Urban) vs. Sparrow (Urban)	-50.5932	0	0	0.001
Ngoantet (Rural) vs. Yaounde (Urban)	Coyote (Urban) vs. Sparrow (Urban)	-44.8345	0	0	0.001
Sparrow (Rural) vs. Coyote (Rural)	Coyote (Urban) vs. Sparrow (Urban)	5.51043	4.14145e-08	0.000759377	0.001
Sparrow (Rural) vs. Coyote (Urban)	Coyote (Urban) vs. Sparrow (Urban)	3.40916	0.00068909	1	0.004
Sparrow (Rural) vs. Maricao (Rural)	Coyote (Urban) vs. Sparrow (Urban)	3.52738	0.000434899	1	0.001
Sparrow (Rural) vs. Mayaguez (Urban)	Coyote (Urban) vs. Sparrow (Urban)	2.94899	0.00329469	1	0.002
Sparrow (Rural) vs. Mbalmayo (Semi-Urban)	Coyote (Urban) vs. Sparrow (Urban)	5.13027	3.50665e-07	0.00642979	0.001
Sparrow (Rural) vs. all	Coyote (Urban) vs. Sparrow (Urban)	2.40513	0.0164903	1	0.012
Sparrow (Rural) vs. all	Coyote (Urban) vs. Sparrow (Urban)	6.68001	3.9214e-11	7.19027e-07	0.001
Sparrow (Rural) vs. Sparrow (Rural)	Coyote (Urban) vs. Sparrow (Urban)	-15.6517	9.42964e-48	1.72902e-43	0.001
Sparrow (Rural) vs. Sparrow (Urban)	Coyote (Urban) vs. Sparrow (Urban)	-16.638	2.56862e-57	4.70983e-53	0.001
Sparrow (Rural) vs. Tibet (Rural)	Coyote (Urban) vs. Sparrow (Urban)	3.81296	0.000150341	1	0.001
Sparrow (Rural) vs. Tibet (Semi-Urban)	Coyote (Urban) vs. Sparrow (Urban)	3.69194	0.000241174	1	0.002
Sparrow (Rural) vs. Tibet (Urban)	Coyote (Urban) vs. Sparrow (Urban)	3.23983	0.00125681	1	0.006
Sparrow (Rural) vs. USA (Urban)	Coyote (Urban) vs. Sparrow (Urban)	17.0103	0	0	0.001
Sparrow (Rural) vs. Venezuela (Rural)	Coyote (Urban) vs. Sparrow (Urban)	5.29902	1.35953e-07	0.00249283	0.001
Sparrow (Rural) vs. Yaounde (Urban)	Coyote (Urban) vs. Sparrow (Urban)	5.93177	3.97436e-09	7.28739e-05	0.001
Sparrow (Urban) vs. Sparrow (Urban)	Coyote (Urban) vs. Sparrow (Urban)	-17.4717	1.5619e-62	2.8639e-58	0.001
Tibet (Rural) vs. Tibet (Rural)	Coyote (Urban) vs. Sparrow (Urban)	-46.2112	7.39578e-182	1.35609e-177	0.001
Tibet (Semi-Urban) vs. Coyote (Rural)	Coyote (Urban) vs. Sparrow (Urban)	-2.83011	0.00475873	1	0.003
Tibet (Semi-Urban) vs. Coyote (Urban)	Coyote (Urban) vs. Sparrow (Urban)	-6.44899	2.4748e-10	4.53779e-06	0.001
Tibet (Semi-Urban) vs. Mayaguez (Urban)	Coyote (Urban) vs. Sparrow (Urban)	-3.87409	0.000119962	1	0.001
Tibet (Semi-Urban) vs. Mbalmayo (Semi-Urban)	Coyote (Urban) vs. Sparrow (Urban)	-38.592	8.99828e-169	1.64992e-164	0.001
Tibet (Semi-Urban) vs. all	Coyote (Urban) vs. Sparrow (Urban)	-30.918	3.99121e-118	7.31828e-114	0.001
Tibet (Semi-Urban) vs. all	Coyote (Urban) vs. Sparrow (Urban)	-27.4329	3.75846e-111	6.89151e-107	0.001
Tibet (Semi-Urban) vs. Sparrow (Urban)	Coyote (Urban) vs. Sparrow (Urban)	4.9445	9.21083e-07	0.016889	0.001
Tibet (Semi-Urban) vs. Tibet (Rural)	Coyote (Urban) vs. Sparrow (Urban)	-38.4429	1.13724e-155	2.08525e-151	0.001
Tibet (Semi-Urban) vs. Tibet (Semi-Urban)	Coyote (Urban) vs. Sparrow (Urban)	-31.2444	2.91945e-119	5.35311e-115	0.001
Tibet (Semi-Urban) vs. Tibet (Urban)	Coyote (Urban) vs. Sparrow (Urban)	-27.8987	3.31071e-106	6.07053e-102	0.001
Tibet (Semi-Urban) vs. USA (Urban)	Coyote (Urban) vs. Sparrow (Urban)	-33.3705	2.38348e-199	4.37034e-195	0.001
Tibet (Semi-Urban) vs. Venezuela (Rural)	Coyote (Urban) vs. Sparrow (Urban)	-41.8484	9.9564e-201	1.82561e-196	0.001
Tibet (Semi-Urban) vs. Yaounde (Urban)	Coyote (Urban) vs. Sparrow (Urban)	-39.7108	1.8605e-181	3.41141e-177	0.001
Tibet (Urban) vs. Tibet (Urban)	Coyote (Urban) vs. Sparrow (Urban)	-25.0425	4.4953e-90	8.24259e-86	0.001
USA (Urban) vs. Coyote (Rural)	Coyote (Urban) vs. Sparrow (Urban)	-8.14066	4.30755e-16	7.89832e-12	0.001
USA (Urban) vs. Coyote (Urban)	Coyote (Urban) vs. Sparrow (Urban)	-10.111	1.27201e-23	2.33235e-19	0.001
USA (Urban) vs. Mayaguez (Urban)	Coyote (Urban) vs. Sparrow (Urban)	-16.8029	2.17043e-60	3.97969e-56	0.001
USA (Urban) vs. Mbalmayo (Semi-Urban)	Coyote (Urban) vs. Sparrow (Urban)	-39.0769	1.86057e-293	3.41154e-289	0.001
USA (Urban) vs. all	Coyote (Urban) vs. Sparrow (Urban)	-32.1299	1.41628e-169	2.59689e-165	0.001
USA (Urban) vs. all	Coyote (Urban) vs. Sparrow (Urban)	-62.2339	0	0	0.001
USA (Urban) vs. Sparrow (Urban)	Coyote (Urban) vs. Sparrow (Urban)	14.9334	0	0	0.001
USA (Urban) vs. Tibet (Rural)	Coyote (Urban) vs. Sparrow (Urban)	-34.6123	1.51512e-211	2.77812e-207	0.001
USA (Urban) vs. Tibet (Urban)	Coyote (Urban) vs. Sparrow (Urban)	-52.8325	0	0	0.001
USA (Urban) vs. USA (Urban)	Coyote (Urban) vs. Sparrow (Urban)	-69.2423	0	0	0.001
USA (Urban) vs. Venezuela (Rural)	Coyote (Urban) vs. Sparrow (Urban)	-45.3516	0	0	0.001
Venezuela (Rural) vs. Venezuela (Rural)	Coyote (Urban) vs. Sparrow (Urban)	-58.6465	0	0	0.001
Yaounde (Urban) vs. Coyote (Rural)	Coyote (Urban) vs. Sparrow (Urban)	-7.12785	1.42324e-12	2.60965e-08	0.001
Yaounde (Urban) vs. Coyote (Urban)	Coyote (Urban) vs. Sparrow (Urban)	-9.80829	1.84e-21	3.37383e-17	0.001
Yaounde (Urban) vs. Mayaguez (Urban)	Coyote (Urban) vs. Sparrow (Urban)	-10.0934	1.45954e-22	2.6762e-18	0.001
Yaounde (Urban) vs. Mbalmayo (Semi-Urban)	Coyote (Urban) vs. Sparrow (Urban)	-49.4088	4.14665e-279	7.6033e-275	0.001
Yaounde (Urban) vs. all	Coyote (Urban) vs. Sparrow (Urban)	-29.8436	1.45717e-119	2.67187e-115	0.001
Yaounde (Urban) vs. all	Coyote (Urban) vs. Sparrow (Urban)	-41.1686	2.30664e-229	4.22946e-225	0.001
Yaounde (Urban) vs. Sparrow (Urban)	Coyote (Urban) vs. Sparrow (Urban)	5.47545	4.96697e-08	0.000910744	0.001
Yaounde (Urban) vs. Tibet (Rural)	Coyote (Urban) vs. Sparrow (Urban)	-38.8072	1.2136e-176	2.22525e-172	0.001
Yaounde (Urban) vs. Tibet (Urban)	Coyote (Urban) vs. Sparrow (Urban)	-50.198	3.75393e-234	6.88321e-230	0.001
Yaounde (Urban) vs. USA (Urban)	Coyote (Urban) vs. Sparrow (Urban)	-45.0511	0	0	0.001
Yaounde (Urban) vs. Venezuela (Rural)	Coyote (Urban) vs. Sparrow (Urban)	-51.003	0	0	0.001
Yaounde (Urban) vs. Yaounde (Urban)	Coyote (Urban) vs. Sparrow (Urban)	-51.9847	1.19121e-269	2.18419e-265	0.001
All between population	Coyote (Urban) vs. Tibet (Rural)	-5.18751	2.13314e-07	0.00391132	0.001
All within population	Coyote (Urban) vs. Tibet (Rural)	-21.86	3.04629e-105	5.58568e-101	0.001
Coyote (Rural) vs. Coyote (Rural)	Coyote (Urban) vs. Tibet (Rural)	-13.5642	1.78196e-39	3.2674e-35	0.001
Coyote (Rural) vs. Coyote (Urban)	Coyote (Urban) vs. Tibet (Rural)	-10.609	3.28424e-24	6.02199e-20	0.001
Coyote (Rural) vs. Mayaguez (Urban)	Coyote (Urban) vs. Tibet (Rural)	1.54513	0.122844	1	0.124
Coyote (Rural) vs. Mbalmayo (Semi-Urban)	Coyote (Urban) vs. Tibet (Rural)	7.25312	7.39186e-13	1.35537e-08	0.001
Coyote (Rural) vs. all	Coyote (Urban) vs. Tibet (Rural)	5.10261	3.83706e-07	0.00703563	0.001
Coyote (Rural) vs. Sparrow (Urban)	Coyote (Urban) vs. Tibet (Rural)	4.38331	1.21679e-05	0.22311	0.002
Coyote (Rural) vs. Tibet (Rural)	Coyote (Urban) vs. Tibet (Rural)	7.84164	2.77556e-14	5.08926e-10	0.001
Coyote (Rural) vs. Tibet (Urban)	Coyote (Urban) vs. Tibet (Rural)	1.5135	0.130793	1	0.143
Coyote (Rural) vs. Venezuela (Rural)	Coyote (Urban) vs. Tibet (Rural)	-0.068749	0.945196	1	0.946
Coyote (Urban) vs. Coyote (Urban)	Coyote (Urban) vs. Tibet (Rural)	-9.47026	2.58348e-16	4.73706e-12	0.001
Coyote (Urban) vs. Mayaguez (Urban)	Coyote (Urban) vs. Tibet (Rural)	0.943696	0.346604	1	0.36
Coyote (Urban) vs. Mbalmayo (Semi-Urban)	Coyote (Urban) vs. Tibet (Rural)	-1.06876	0.286073	1	0.278
Coyote (Urban) vs. all	Coyote (Urban) vs. Tibet (Rural)	1.16591	0.244525	1	0.229
Coyote (Urban) vs. Sparrow (Urban)	Coyote (Urban) vs. Tibet (Rural)	5.10333	4.60899e-07	0.00845104	0.001
Coyote (Urban) vs. Tibet (Urban)	Coyote (Urban) vs. Tibet (Rural)	-0.742788	0.458713	1	0.477
Coyote (Urban) vs. Venezuela (Rural)	Coyote (Urban) vs. Tibet (Rural)	-2.21272	0.0274092	1	0.033
Malawi (Rural) vs. Coyote (Rural)	Coyote (Urban) vs. Tibet (Rural)	5.92128	3.57155e-09	6.54879e-05	0.001
Malawi (Rural) vs. Coyote (Urban)	Coyote (Urban) vs. Tibet (Rural)	-1.64389	0.100707	1	0.108
Malawi (Rural) vs. Malawi (Rural)	Coyote (Urban) vs. Tibet (Rural)	-39.187	2.8553e-232	5.23547e-228	0.001
Malawi (Rural) vs. Maricao (Rural)	Coyote (Urban) vs. Tibet (Rural)	18.2448	0	0	0.001
Malawi (Rural) vs. Mayaguez (Urban)	Coyote (Urban) vs. Tibet (Rural)	7.85467	1.77636e-14	3.25713e-10	0.001
Malawi (Rural) vs. Mbalmayo (Semi-Urban)	Coyote (Urban) vs. Tibet (Rural)	-27.6089	1.42923e-130	2.62064e-126	0.001
Malawi (Rural) vs. all	Coyote (Urban) vs. Tibet (Rural)	-21.9058	9.62891e-64	1.76556e-59	0.001
Malawi (Rural) vs. all	Coyote (Urban) vs. Tibet (Rural)	-16.5225	4.47824e-56	8.21131e-52	0.001
Malawi (Rural) vs. Sparrow (Rural)	Coyote (Urban) vs. Tibet (Rural)	16.1116	0	0	0.001
Malawi (Rural) vs. Sparrow (Urban)	Coyote (Urban) vs. Tibet (Rural)	19.8201	0	0	0.001
Malawi (Rural) vs. Tibet (Rural)	Coyote (Urban) vs. Tibet (Rural)	-26.6381	1.29123e-98	2.36759e-94	0.001
Malawi (Rural) vs. Tibet (Semi-Urban)	Coyote (Urban) vs. Tibet (Rural)	-17.7388	3.43024e-55	6.2897e-51	0.001
Malawi (Rural) vs. Tibet (Urban)	Coyote (Urban) vs. Tibet (Rural)	-21.3079	1.5789e-72	2.89507e-68	0.001
Malawi (Rural) vs. USA (Urban)	Coyote (Urban) vs. Tibet (Rural)	-18.5416	1.00559e-75	1.84385e-71	0.001
Malawi (Rural) vs. Venezuela (Rural)	Coyote (Urban) vs. Tibet (Rural)	-24.3731	6.14183e-116	1.12617e-111	0.001
Malawi (Rural) vs. Yaounde (Urban)	Coyote (Urban) vs. Tibet (Rural)	-21.1547	4.77301e-88	8.7518e-84	0.001
Maricao (Rural) (non-cristatellus)noncristatellus vs. Coyote (Rural)	Coyote (Urban) vs. Tibet (Rural)	10.3232	0	0	0.001
Maricao (Rural) (non-cristatellus)noncristatellus vs. Coyote (Urban)	Coyote (Urban) vs. Tibet (Rural)	6.76436	4.94642e-11	9.06976e-07	0.001
Maricao (Rural) (non-cristatellus)noncristatellus vs. Malawi (Rural)	Coyote (Urban) vs. Tibet (Rural)	20.4697	0	0	0.001
Maricao (Rural) (non-cristatellus)noncristatellus vs. Maricao (Rural)	Coyote (Urban) vs. Tibet (Rural)	-15.9034	1.49072e-51	2.73339e-47	0.001
Maricao (Rural) (non-cristatellus)noncristatellus vs. Maricao (Rural) (non-cristatellus)noncristatellus	Coyote (Urban) vs. Tibet (Rural)	-15.8351	1.03897e-46	1.90505e-42	0.001
Maricao (Rural) (non-cristatellus)noncristatellus vs. Mayaguez (Urban)	Coyote (Urban) vs. Tibet (Rural)	-12.6286	7.27992e-31	1.33485e-26	0.001
Maricao (Rural) (non-cristatellus)noncristatellus vs. Mbalmayo (Semi-Urban)	Coyote (Urban) vs. Tibet (Rural)	7.64963	6.39488e-14	1.17257e-09	0.001
Maricao (Rural) (non-cristatellus)noncristatellus vs. all	Coyote (Urban) vs. Tibet (Rural)	4.30201	2.63502e-05	0.483158	0.001
Maricao (Rural) (non-cristatellus)noncristatellus vs. all	Coyote (Urban) vs. Tibet (Rural)	-0.25221	0.800942	1	0.792
Maricao (Rural) (non-cristatellus)noncristatellus vs. Sparrow (Rural)	Coyote (Urban) vs. Tibet (Rural)	14.8856	0	0	0.001
Maricao (Rural) (non-cristatellus)noncristatellus vs. Sparrow (Urban)	Coyote (Urban) vs. Tibet (Rural)	6.34623	2.89763e-10	5.3131e-06	0.001
Maricao (Rural) (non-cristatellus)noncristatellus vs. Tibet (Rural)	Coyote (Urban) vs. Tibet (Rural)	7.44111	8.94396e-13	1.63996e-08	0.001
Maricao (Rural) (non-cristatellus)noncristatellus vs. Tibet (Semi-Urban)	Coyote (Urban) vs. Tibet (Rural)	6.36074	6.78794e-10	1.24464e-05	0.001
Maricao (Rural) (non-cristatellus)noncristatellus vs. Tibet (Urban)	Coyote (Urban) vs. Tibet (Rural)	2.51309	0.0124498	1	0.017
Maricao (Rural) (non-cristatellus)noncristatellus vs. USA (Urban)	Coyote (Urban) vs. Tibet (Rural)	2.87284	0.00407995	1	0.004
Maricao (Rural) (non-cristatellus)noncristatellus vs. Venezuela (Rural)	Coyote (Urban) vs. Tibet (Rural)	10.2244	0	0	0.001
Maricao (Rural) (non-cristatellus)noncristatellus vs. Yaounde (Urban)	Coyote (Urban) vs. Tibet (Rural)	3.13508	0.0017694	1	0.007
Maricao (Rural) vs. Coyote (Rural)	Coyote (Urban) vs. Tibet (Rural)	10.9864	0	0	0.001
Maricao (Rural) vs. Coyote (Urban)	Coyote (Urban) vs. Tibet (Rural)	4.91987	1.24767e-06	0.0228773	0.001
Maricao (Rural) vs. Maricao (Rural)	Coyote (Urban) vs. Tibet (Rural)	-15.5699	1.40819e-46	2.58206e-42	0.001
Maricao (Rural) vs. Mayaguez (Urban)	Coyote (Urban) vs. Tibet (Rural)	-14.2752	6.12006e-38	1.12217e-33	0.001
Maricao (Rural) vs. Mbalmayo (Semi-Urban)	Coyote (Urban) vs. Tibet (Rural)	5.73687	1.37249e-08	0.00025166	0.001
Maricao (Rural) vs. all	Coyote (Urban) vs. Tibet (Rural)	3.47204	0.000624826	1	0.002
Maricao (Rural) vs. all	Coyote (Urban) vs. Tibet (Rural)	-2.28421	0.0225926	1	0.024
Maricao (Rural) vs. Sparrow (Urban)	Coyote (Urban) vs. Tibet (Rural)	2.58922	0.00970261	1	0.018
Maricao (Rural) vs. Tibet (Rural)	Coyote (Urban) vs. Tibet (Rural)	7.02688	1.10931e-11	2.03404e-07	0.001
Maricao (Rural) vs. Tibet (Semi-Urban)	Coyote (Urban) vs. Tibet (Rural)	4.53625	7.87903e-06	0.14447	0.002
Maricao (Rural) vs. Tibet (Urban)	Coyote (Urban) vs. Tibet (Rural)	1.35701	0.175654	1	0.18
Maricao (Rural) vs. USA (Urban)	Coyote (Urban) vs. Tibet (Rural)	-0.328623	0.742449	1	0.745
Maricao (Rural) vs. Venezuela (Rural)	Coyote (Urban) vs. Tibet (Rural)	6.62485	4.98102e-11	9.13319e-07	0.001
Maricao (Rural) vs. Yaounde (Urban)	Coyote (Urban) vs. Tibet (Rural)	0.941306	0.346762	1	0.355
Mayaguez (Urban) vs. Mayaguez (Urban)	Coyote (Urban) vs. Tibet (Rural)	-13.2901	1.54108e-25	2.82572e-21	0.001
Mbalmayo (Semi-Urban) vs. Mbalmayo (Semi-Urban)	Coyote (Urban) vs. Tibet (Rural)	-23.6802	1.47619e-69	2.70674e-65	0.001
Ngoantet (Rural) vs. Coyote (Rural)	Coyote (Urban) vs. Tibet (Rural)	6.25027	4.51192e-10	8.27306e-06	0.001
Ngoantet (Rural) vs. Coyote (Urban)	Coyote (Urban) vs. Tibet (Rural)	-1.10412	0.269851	1	0.286
Ngoantet (Rural) vs. Malawi (Rural)	Coyote (Urban) vs. Tibet (Rural)	-24.2503	7.43984e-122	1.36417e-117	0.001
Ngoantet (Rural) vs. Maricao (Rural)	Coyote (Urban) vs. Tibet (Rural)	7.94097	2.88658e-15	5.29283e-11	0.001
Ngoantet (Rural) vs. Maricao (Rural) (non-cristatellus)noncristatellus	Coyote (Urban) vs. Tibet (Rural)	10.1933	0	0	0.001
Ngoantet (Rural) vs. Mayaguez (Urban)	Coyote (Urban) vs. Tibet (Rural)	3.71791	0.000213918	1	0.001
Ngoantet (Rural) vs. Mbalmayo (Semi-Urban)	Coyote (Urban) vs. Tibet (Rural)	-20.9634	4.64597e-87	8.51886e-83	0.001
Ngoantet (Rural) vs. all	Coyote (Urban) vs. Tibet (Rural)	-17.8048	2.50225e-52	4.58812e-48	0.001
Ngoantet (Rural) vs. all	Coyote (Urban) vs. Tibet (Rural)	-11.9193	1.14774e-31	2.1045e-27	0.001
Ngoantet (Rural) vs. Ngoantet (Rural)	Coyote (Urban) vs. Tibet (Rural)	-18.6618	1.01346e-73	1.85827e-69	0.001
Ngoantet (Rural) vs. Sparrow (Rural)	Coyote (Urban) vs. Tibet (Rural)	22.6571	0	0	0.001
Ngoantet (Rural) vs. Sparrow (Urban)	Coyote (Urban) vs. Tibet (Rural)	23.8962	0	0	0.001
Ngoantet (Rural) vs. Tibet (Rural)	Coyote (Urban) vs. Tibet (Rural)	-18.9043	9.67997e-65	1.77492e-60	0.001
Ngoantet (Rural) vs. Tibet (Semi-Urban)	Coyote (Urban) vs. Tibet (Rural)	-14.0475	1.10684e-39	2.0295e-35	0.001
Ngoantet (Rural) vs. Tibet (Urban)	Coyote (Urban) vs. Tibet (Rural)	-15.8128	2.1033e-48	3.85661e-44	0.001
Ngoantet (Rural) vs. USA (Urban)	Coyote (Urban) vs. Tibet (Rural)	-12.9889	2.1106e-38	3.86999e-34	0.001
Ngoantet (Rural) vs. Venezuela (Rural)	Coyote (Urban) vs. Tibet (Rural)	-19.4629	1.29655e-79	2.37735e-75	0.001
Ngoantet (Rural) vs. Yaounde (Urban)	Coyote (Urban) vs. Tibet (Rural)	-17.1925	1.77075e-62	3.24684e-58	0.001
Sparrow (Rural) vs. Coyote (Rural)	Coyote (Urban) vs. Tibet (Rural)	11.8058	0	0	0.001
Sparrow (Rural) vs. Coyote (Urban)	Coyote (Urban) vs. Tibet (Rural)	8.09488	1.35447e-14	2.48356e-10	0.001
Sparrow (Rural) vs. Maricao (Rural)	Coyote (Urban) vs. Tibet (Rural)	8.17419	1.11022e-15	2.0357e-11	0.001
Sparrow (Rural) vs. Mayaguez (Urban)	Coyote (Urban) vs. Tibet (Rural)	7.80701	9.23706e-14	1.69371e-09	0.001
Sparrow (Rural) vs. Mbalmayo (Semi-Urban)	Coyote (Urban) vs. Tibet (Rural)	11.864	0	0	0.001
Sparrow (Rural) vs. all	Coyote (Urban) vs. Tibet (Rural)	5.30919	3.4055e-07	0.00624432	0.001
Sparrow (Rural) vs. all	Coyote (Urban) vs. Tibet (Rural)	13.5258	0	0	0.001
Sparrow (Rural) vs. Sparrow (Rural)	Coyote (Urban) vs. Tibet (Rural)	-5.84526	1.21192e-08	0.000222217	0.001
Sparrow (Rural) vs. Sparrow (Urban)	Coyote (Urban) vs. Tibet (Rural)	-6.16334	9.8144e-10	1.79957e-05	0.001
Sparrow (Rural) vs. Tibet (Rural)	Coyote (Urban) vs. Tibet (Rural)	7.78013	1.672e-13	3.06577e-09	0.001
Sparrow (Rural) vs. Tibet (Semi-Urban)	Coyote (Urban) vs. Tibet (Rural)	7.70241	2.75113e-13	5.04448e-09	0.001
Sparrow (Rural) vs. Tibet (Urban)	Coyote (Urban) vs. Tibet (Rural)	7.40905	1.75082e-12	3.21031e-08	0.001
Sparrow (Rural) vs. USA (Urban)	Coyote (Urban) vs. Tibet (Rural)	35.3424	0	0	0.001
Sparrow (Rural) vs. Venezuela (Rural)	Coyote (Urban) vs. Tibet (Rural)	13.7751	0	0	0.001
Sparrow (Rural) vs. Yaounde (Urban)	Coyote (Urban) vs. Tibet (Rural)	13.8109	0	0	0.001
Sparrow (Urban) vs. Sparrow (Urban)	Coyote (Urban) vs. Tibet (Rural)	-6.44089	1.73685e-10	3.1847e-06	0.001
Tibet (Rural) vs. Tibet (Rural)	Coyote (Urban) vs. Tibet (Rural)	-19.2859	1.88709e-36	3.46016e-32	0.001
Tibet (Semi-Urban) vs. Coyote (Rural)	Coyote (Urban) vs. Tibet (Rural)	4.39721	1.34363e-05	0.246367	0.001
Tibet (Semi-Urban) vs. Coyote (Urban)	Coyote (Urban) vs. Tibet (Rural)	-0.879619	0.380402	1	0.394
Tibet (Semi-Urban) vs. Mayaguez (Urban)	Coyote (Urban) vs. Tibet (Rural)	0.857082	0.392697	1	0.388
Tibet (Semi-Urban) vs. Mbalmayo (Semi-Urban)	Coyote (Urban) vs. Tibet (Rural)	-15.0963	6.89983e-37	1.26515e-32	0.001
Tibet (Semi-Urban) vs. all	Coyote (Urban) vs. Tibet (Rural)	-12.6334	3.78585e-23	6.94174e-19	0.001
Tibet (Semi-Urban) vs. all	Coyote (Urban) vs. Tibet (Rural)	-10.3664	2.04554e-21	3.7507e-17	0.001
Tibet (Semi-Urban) vs. Sparrow (Urban)	Coyote (Urban) vs. Tibet (Rural)	10.7333	0	0	0.001
Tibet (Semi-Urban) vs. Tibet (Rural)	Coyote (Urban) vs. Tibet (Rural)	-15.5225	2.15542e-32	3.95218e-28	0.001
Tibet (Semi-Urban) vs. Tibet (Semi-Urban)	Coyote (Urban) vs. Tibet (Rural)	-13.1153	6.25195e-24	1.14636e-19	0.001
Tibet (Semi-Urban) vs. Tibet (Urban)	Coyote (Urban) vs. Tibet (Rural)	-11.0053	9.37687e-21	1.71934e-16	0.001
Tibet (Semi-Urban) vs. USA (Urban)	Coyote (Urban) vs. Tibet (Rural)	-12.3178	1.33604e-33	2.44976e-29	0.001
Tibet (Semi-Urban) vs. Venezuela (Rural)	Coyote (Urban) vs. Tibet (Rural)	-16.1026	6.78841e-45	1.24472e-40	0.001
Tibet (Semi-Urban) vs. Yaounde (Urban)	Coyote (Urban) vs. Tibet (Rural)	-15.3606	5.48064e-40	1.00493e-35	0.001
Tibet (Urban) vs. Tibet (Urban)	Coyote (Urban) vs. Tibet (Rural)	-10.2981	1.18766e-17	2.17769e-13	0.001
USA (Urban) vs. Coyote (Rural)	Coyote (Urban) vs. Tibet (Rural)	2.27495	0.0229265	1	0.023
USA (Urban) vs. Coyote (Urban)	Coyote (Urban) vs. Tibet (Rural)	-0.265437	0.790696	1	0.766
USA (Urban) vs. Mayaguez (Urban)	Coyote (Urban) vs. Tibet (Rural)	-3.35141	0.000816694	1	0.001
USA (Urban) vs. Mbalmayo (Semi-Urban)	Coyote (Urban) vs. Tibet (Rural)	-14.149	1.4344e-44	2.63012e-40	0.001
USA (Urban) vs. all	Coyote (Urban) vs. Tibet (Rural)	-10.9865	1.41583e-26	2.59607e-22	0.001
USA (Urban) vs. all	Coyote (Urban) vs. Tibet (Rural)	-24.0522	1.10881e-121	2.03312e-117	0.001
USA (Urban) vs. Sparrow (Urban)	Coyote (Urban) vs. Tibet (Rural)	29.069	0	0	0.001
USA (Urban) vs. Tibet (Rural)	Coyote (Urban) vs. Tibet (Rural)	-11.8693	2.12814e-31	3.90216e-27	0.001
USA (Urban) vs. Tibet (Urban)	Coyote (Urban) vs. Tibet (Rural)	-20.0291	3.96747e-81	7.27476e-77	0.001
USA (Urban) vs. USA (Urban)	Coyote (Urban) vs. Tibet (Rural)	-27.1873	1.62807e-160	2.98523e-156	0.001
USA (Urban) vs. Venezuela (Rural)	Coyote (Urban) vs. Tibet (Rural)	-16.9244	3.00242e-63	5.50523e-59	0.001
Venezuela (Rural) vs. Venezuela (Rural)	Coyote (Urban) vs. Tibet (Rural)	-23.1335	1.38167e-90	2.53342e-86	0.001
Yaounde (Urban) vs. Coyote (Rural)	Coyote (Urban) vs. Tibet (Rural)	2.44456	0.0146111	1	0.012
Yaounde (Urban) vs. Coyote (Urban)	Coyote (Urban) vs. Tibet (Rural)	-1.59456	0.111669	1	0.118
Yaounde (Urban) vs. Mayaguez (Urban)	Coyote (Urban) vs. Tibet (Rural)	-1.03596	0.300901	1	0.303
Yaounde (Urban) vs. Mbalmayo (Semi-Urban)	Coyote (Urban) vs. Tibet (Rural)	-19.2045	4.00827e-66	7.34957e-62	0.001
Yaounde (Urban) vs. all	Coyote (Urban) vs. Tibet (Rural)	-11.5792	6.54315e-24	1.19975e-19	0.001
Yaounde (Urban) vs. all	Coyote (Urban) vs. Tibet (Rural)	-15.5374	1.37987e-47	2.53013e-43	0.001
Yaounde (Urban) vs. Sparrow (Urban)	Coyote (Urban) vs. Tibet (Rural)	16.1009	0	0	0.001
Yaounde (Urban) vs. Tibet (Rural)	Coyote (Urban) vs. Tibet (Rural)	-14.9735	1.61791e-38	2.96661e-34	0.001
Yaounde (Urban) vs. Tibet (Urban)	Coyote (Urban) vs. Tibet (Rural)	-19.7633	7.87136e-57	1.44329e-52	0.001
Yaounde (Urban) vs. USA (Urban)	Coyote (Urban) vs. Tibet (Rural)	-16.8097	3.85522e-62	7.06894e-58	0.001
Yaounde (Urban) vs. Venezuela (Rural)	Coyote (Urban) vs. Tibet (Rural)	-19.582	3.7165e-74	6.81458e-70	0.001
Yaounde (Urban) vs. Yaounde (Urban)	Coyote (Urban) vs. Tibet (Rural)	-20.2659	1.42335e-66	2.60986e-62	0.001
All between population	Coyote (Urban) vs. Tibet (Urban)	-4.82651	1.3904e-06	0.0254943	0.001
All within population	Coyote (Urban) vs. Tibet (Urban)	-21.5398	2.94036e-102	5.39144e-98	0.001
Coyote (Rural) vs. Coyote (Rural)	Coyote (Urban) vs. Tibet (Urban)	-13.3403	2.60545e-38	4.77736e-34	0.001
Coyote (Rural) vs. Coyote (Urban)	Coyote (Urban) vs. Tibet (Urban)	-10.4071	1.99978e-23	3.66679e-19	0.001
Coyote (Rural) vs. Mayaguez (Urban)	Coyote (Urban) vs. Tibet (Urban)	2.60158	0.00950942	1	0.012
Coyote (Rural) vs. Mbalmayo (Semi-Urban)	Coyote (Urban) vs. Tibet (Urban)	9.89997	0	0	0.001
Coyote (Rural) vs. all	Coyote (Urban) vs. Tibet (Urban)	7.19133	1.06892e-12	1.95998e-08	0.001
Coyote (Rural) vs. Sparrow (Urban)	Coyote (Urban) vs. Tibet (Urban)	5.68409	1.46639e-08	0.000268877	0.001
Coyote (Rural) vs. Tibet (Rural)	Coyote (Urban) vs. Tibet (Urban)	10.7355	0	0	0.001
Coyote (Rural) vs. Tibet (Urban)	Coyote (Urban) vs. Tibet (Urban)	2.86536	0.00434286	1	0.007
Coyote (Rural) vs. Venezuela (Rural)	Coyote (Urban) vs. Tibet (Urban)	0.955711	0.339331	1	0.35
Coyote (Urban) vs. Coyote (Urban)	Coyote (Urban) vs. Tibet (Urban)	-9.33782	5.37405e-16	9.85386e-12	0.001
Coyote (Urban) vs. Mayaguez (Urban)	Coyote (Urban) vs. Tibet (Urban)	1.81135	0.0717724	1	0.088
Coyote (Urban) vs. Mbalmayo (Semi-Urban)	Coyote (Urban) vs. Tibet (Urban)	-0.434928	0.66394	1	0.684
Coyote (Urban) vs. all	Coyote (Urban) vs. Tibet (Urban)	2.35962	0.0188978	1	0.021
Coyote (Urban) vs. Sparrow (Urban)	Coyote (Urban) vs. Tibet (Urban)	6.71677	4.66069e-11	8.54585e-07	0.001
Coyote (Urban) vs. Venezuela (Rural)	Coyote (Urban) vs. Tibet (Urban)	-1.64455	0.100749	1	0.102
Malawi (Rural) vs. Coyote (Rural)	Coyote (Urban) vs. Tibet (Urban)	8.11883	6.66134e-16	1.22142e-11	0.001
Malawi (Rural) vs. Coyote (Urban)	Coyote (Urban) vs. Tibet (Urban)	-1.12926	0.259227	1	0.264
Malawi (Rural) vs. Malawi (Rural)	Coyote (Urban) vs. Tibet (Urban)	-38.7736	8.82728e-229	1.61857e-224	0.001
Malawi (Rural) vs. Maricao (Rural)	Coyote (Urban) vs. Tibet (Urban)	24.058	0	0	0.001
Malawi (Rural) vs. Mayaguez (Urban)	Coyote (Urban) vs. Tibet (Urban)	10.7377	0	0	0.001
Malawi (Rural) vs. Mbalmayo (Semi-Urban)	Coyote (Urban) vs. Tibet (Urban)	-27.1912	1.69228e-127	3.10297e-123	0.001
Malawi (Rural) vs. all	Coyote (Urban) vs. Tibet (Urban)	-21.6337	9.34905e-63	1.71424e-58	0.001
Malawi (Rural) vs. all	Coyote (Urban) vs. Tibet (Urban)	-15.7967	8.86094e-52	1.62474e-47	0.001
Malawi (Rural) vs. Sparrow (Rural)	Coyote (Urban) vs. Tibet (Urban)	21.0849	0	0	0.001
Malawi (Rural) vs. Sparrow (Urban)	Coyote (Urban) vs. Tibet (Urban)	25.4279	0	0	0.001
Malawi (Rural) vs. Tibet (Rural)	Coyote (Urban) vs. Tibet (Urban)	-26.2136	1.47965e-96	2.71308e-92	0.001
Malawi (Rural) vs. Tibet (Semi-Urban)	Coyote (Urban) vs. Tibet (Urban)	-17.3733	1.89664e-53	3.47768e-49	0.001
Malawi (Rural) vs. Tibet (Urban)	Coyote (Urban) vs. Tibet (Urban)	-20.789	5.52488e-70	1.01304e-65	0.001
Malawi (Rural) vs. USA (Urban)	Coyote (Urban) vs. Tibet (Urban)	-17.9538	3.56375e-71	6.5345e-67	0.001
Malawi (Rural) vs. Venezuela (Rural)	Coyote (Urban) vs. Tibet (Urban)	-24.0233	4.74904e-113	8.70783e-109	0.001
Malawi (Rural) vs. Yaounde (Urban)	Coyote (Urban) vs. Tibet (Urban)	-20.7162	6.82485e-85	1.2514e-80	0.001
Maricao (Rural) (non-cristatellus)noncristatellus vs. Coyote (Rural)	Coyote (Urban) vs. Tibet (Urban)	12.8926	0	0	0.001
Maricao (Rural) (non-cristatellus)noncristatellus vs. Coyote (Urban)	Coyote (Urban) vs. Tibet (Urban)	8.94202	0	0	0.001
Maricao (Rural) (non-cristatellus)noncristatellus vs. Malawi (Rural)	Coyote (Urban) vs. Tibet (Urban)	27.1652	0	0	0.001
Maricao (Rural) (non-cristatellus)noncristatellus vs. Maricao (Rural)	Coyote (Urban) vs. Tibet (Urban)	-15.5157	2.25759e-49	4.13951e-45	0.001
Maricao (Rural) (non-cristatellus)noncristatellus vs. Maricao (Rural) (non-cristatellus)noncristatellus	Coyote (Urban) vs. Tibet (Urban)	-15.5132	3.40008e-45	6.23438e-41	0.001
Maricao (Rural) (non-cristatellus)noncristatellus vs. Mayaguez (Urban)	Coyote (Urban) vs. Tibet (Urban)	-12.2583	2.00114e-29	3.66929e-25	0.001
Maricao (Rural) (non-cristatellus)noncristatellus vs. Mbalmayo (Semi-Urban)	Coyote (Urban) vs. Tibet (Urban)	10.4276	0	0	0.001
Maricao (Rural) (non-cristatellus)noncristatellus vs. all	Coyote (Urban) vs. Tibet (Urban)	6.02419	7.92301e-09	0.000145276	0.001
Maricao (Rural) (non-cristatellus)noncristatellus vs. all	Coyote (Urban) vs. Tibet (Urban)	1.02026	0.307905	1	0.307
Maricao (Rural) (non-cristatellus)noncristatellus vs. Sparrow (Rural)	Coyote (Urban) vs. Tibet (Urban)	19.7728	0	0	0.001
Maricao (Rural) (non-cristatellus)noncristatellus vs. Sparrow (Urban)	Coyote (Urban) vs. Tibet (Urban)	8.09934	1.11022e-15	2.0357e-11	0.001
Maricao (Rural) (non-cristatellus)noncristatellus vs. Tibet (Rural)	Coyote (Urban) vs. Tibet (Urban)	10.0317	0	0	0.001
Maricao (Rural) (non-cristatellus)noncristatellus vs. Tibet (Semi-Urban)	Coyote (Urban) vs. Tibet (Urban)	8.66877	2.22045e-16	4.07141e-12	0.001
Maricao (Rural) (non-cristatellus)noncristatellus vs. Tibet (Urban)	Coyote (Urban) vs. Tibet (Urban)	4.17788	3.78262e-05	0.693581	0.001
Maricao (Rural) (non-cristatellus)noncristatellus vs. USA (Urban)	Coyote (Urban) vs. Tibet (Urban)	4.88388	1.06279e-06	0.0194874	0.001
Maricao (Rural) (non-cristatellus)noncristatellus vs. Venezuela (Rural)	Coyote (Urban) vs. Tibet (Urban)	13.3315	0	0	0.001
Maricao (Rural) (non-cristatellus)noncristatellus vs. Yaounde (Urban)	Coyote (Urban) vs. Tibet (Urban)	4.94584	8.92177e-07	0.0163589	0.001
Maricao (Rural) vs. Coyote (Rural)	Coyote (Urban) vs. Tibet (Urban)	14.0568	0	0	0.001
Maricao (Rural) vs. Coyote (Urban)	Coyote (Urban) vs. Tibet (Urban)	6.63703	9.95299e-11	1.82498e-06	0.001
Maricao (Rural) vs. Maricao (Rural)	Coyote (Urban) vs. Tibet (Urban)	-15.2491	5.25241e-45	9.63082e-41	0.001
Maricao (Rural) vs. Mayaguez (Urban)	Coyote (Urban) vs. Tibet (Urban)	-13.9685	1.16589e-36	2.13777e-32	0.001
Maricao (Rural) vs. Mbalmayo (Semi-Urban)	Coyote (Urban) vs. Tibet (Urban)	8.12999	1.77636e-15	3.25713e-11	0.001
Maricao (Rural) vs. all	Coyote (Urban) vs. Tibet (Urban)	5.08657	7.95669e-07	0.0145894	0.001
Maricao (Rural) vs. all	Coyote (Urban) vs. Tibet (Urban)	-1.20984	0.226659	1	0.214
Maricao (Rural) vs. Sparrow (Urban)	Coyote (Urban) vs. Tibet (Urban)	3.59591	0.000332621	1	0.004
Maricao (Rural) vs. Tibet (Rural)	Coyote (Urban) vs. Tibet (Urban)	9.55792	0	0	0.001
Maricao (Rural) vs. Tibet (Semi-Urban)	Coyote (Urban) vs. Tibet (Urban)	6.41616	4.54017e-10	8.32485e-06	0.001
Maricao (Rural) vs. Tibet (Urban)	Coyote (Urban) vs. Tibet (Urban)	2.90518	0.00390385	1	0.003
Maricao (Rural) vs. USA (Urban)	Coyote (Urban) vs. Tibet (Urban)	1.24518	0.213102	1	0.214
Maricao (Rural) vs. Venezuela (Rural)	Coyote (Urban) vs. Tibet (Urban)	8.87623	0	0	0.001
Maricao (Rural) vs. Yaounde (Urban)	Coyote (Urban) vs. Tibet (Urban)	2.43185	0.0151861	1	0.023
Mayaguez (Urban) vs. Mayaguez (Urban)	Coyote (Urban) vs. Tibet (Urban)	-13.1925	2.63471e-25	4.831e-21	0.001
Mbalmayo (Semi-Urban) vs. Mbalmayo (Semi-Urban)	Coyote (Urban) vs. Tibet (Urban)	-23.4286	1.12243e-68	2.05809e-64	0.001
Ngoantet (Rural) vs. Coyote (Rural)	Coyote (Urban) vs. Tibet (Urban)	8.3572	2.22045e-16	4.07141e-12	0.001
Ngoantet (Rural) vs. Coyote (Urban)	Coyote (Urban) vs. Tibet (Urban)	-0.390682	0.69613	1	0.711
Ngoantet (Rural) vs. Malawi (Rural)	Coyote (Urban) vs. Tibet (Urban)	-23.8422	4.30199e-118	7.88813e-114	0.001
Ngoantet (Rural) vs. Maricao (Rural)	Coyote (Urban) vs. Tibet (Urban)	10.7093	0	0	0.001
Ngoantet (Rural) vs. Maricao (Rural) (non-cristatellus)noncristatellus	Coyote (Urban) vs. Tibet (Urban)	13.3173	0	0	0.001
Ngoantet (Rural) vs. Mayaguez (Urban)	Coyote (Urban) vs. Tibet (Urban)	5.55426	3.71929e-08	0.000681969	0.001
Ngoantet (Rural) vs. Mbalmayo (Semi-Urban)	Coyote (Urban) vs. Tibet (Urban)	-20.637	1.06473e-84	1.9523e-80	0.001
Ngoantet (Rural) vs. all	Coyote (Urban) vs. Tibet (Urban)	-17.5481	3.13361e-51	5.74579e-47	0.001
Ngoantet (Rural) vs. all	Coyote (Urban) vs. Tibet (Urban)	-11.3616	5.18748e-29	9.51177e-25	0.001
Ngoantet (Rural) vs. Ngoantet (Rural)	Coyote (Urban) vs. Tibet (Urban)	-18.3601	1.56679e-71	2.87286e-67	0.001
Ngoantet (Rural) vs. Sparrow (Rural)	Coyote (Urban) vs. Tibet (Urban)	30.0298	0	0	0.001
Ngoantet (Rural) vs. Sparrow (Urban)	Coyote (Urban) vs. Tibet (Urban)	30.6286	0	0	0.001
Ngoantet (Rural) vs. Tibet (Rural)	Coyote (Urban) vs. Tibet (Urban)	-18.5277	1.07968e-62	1.9797e-58	0.001
Ngoantet (Rural) vs. Tibet (Semi-Urban)	Coyote (Urban) vs. Tibet (Urban)	-13.736	3.35431e-38	6.15047e-34	0.001
Ngoantet (Rural) vs. Tibet (Urban)	Coyote (Urban) vs. Tibet (Urban)	-15.2696	1.15235e-45	2.11294e-41	0.001
Ngoantet (Rural) vs. USA (Urban)	Coyote (Urban) vs. Tibet (Urban)	-12.3538	6.4536e-35	1.18333e-30	0.001
Ngoantet (Rural) vs. Venezuela (Rural)	Coyote (Urban) vs. Tibet (Urban)	-19.0724	1.07857e-76	1.97767e-72	0.001
Ngoantet (Rural) vs. Yaounde (Urban)	Coyote (Urban) vs. Tibet (Urban)	-16.8309	4.30289e-60	7.88977e-56	0.001
Sparrow (Rural) vs. Coyote (Rural)	Coyote (Urban) vs. Tibet (Urban)	14.8955	0	0	0.001
Sparrow (Rural) vs. Coyote (Urban)	Coyote (Urban) vs. Tibet (Urban)	10.8279	0	0	0.001
Sparrow (Rural) vs. Maricao (Rural)	Coyote (Urban) vs. Tibet (Urban)	10.2743	0	0	0.001
Sparrow (Rural) vs. Mayaguez (Urban)	Coyote (Urban) vs. Tibet (Urban)	10.4966	0	0	0.001
Sparrow (Rural) vs. Mbalmayo (Semi-Urban)	Coyote (Urban) vs. Tibet (Urban)	15.8471	0	0	0.001
Sparrow (Rural) vs. all	Coyote (Urban) vs. Tibet (Urban)	7.09087	3.41915e-11	6.26936e-07	0.001
Sparrow (Rural) vs. all	Coyote (Urban) vs. Tibet (Urban)	17.9642	0	0	0.001
Sparrow (Rural) vs. Sparrow (Rural)	Coyote (Urban) vs. Tibet (Urban)	-5.67716	2.99628e-08	0.000549399	0.001
Sparrow (Rural) vs. Sparrow (Urban)	Coyote (Urban) vs. Tibet (Urban)	-5.97077	3.13576e-09	5.74972e-05	0.001
Sparrow (Rural) vs. Tibet (Rural)	Coyote (Urban) vs. Tibet (Urban)	10.3435	0	0	0.001
Sparrow (Rural) vs. Tibet (Semi-Urban)	Coyote (Urban) vs. Tibet (Urban)	10.2528	0	0	0.001
Sparrow (Rural) vs. Tibet (Urban)	Coyote (Urban) vs. Tibet (Urban)	9.90896	0	0	0.001
Sparrow (Rural) vs. USA (Urban)	Coyote (Urban) vs. Tibet (Urban)	45.9524	0	0	0.001
Sparrow (Rural) vs. Venezuela (Rural)	Coyote (Urban) vs. Tibet (Urban)	18.19	0	0	0.001
Sparrow (Rural) vs. Yaounde (Urban)	Coyote (Urban) vs. Tibet (Urban)	18.4303	0	0	0.001
Sparrow (Urban) vs. Sparrow (Urban)	Coyote (Urban) vs. Tibet (Urban)	-6.22986	6.52055e-10	1.19561e-05	0.001
Tibet (Rural) vs. Tibet (Rural)	Coyote (Urban) vs. Tibet (Urban)	-19.3006	1.77175e-36	3.24868e-32	0.001
Tibet (Semi-Urban) vs. Coyote (Rural)	Coyote (Urban) vs. Tibet (Urban)	6.29327	6.86236e-10	1.25828e-05	0.001
Tibet (Semi-Urban) vs. Coyote (Urban)	Coyote (Urban) vs. Tibet (Urban)	-0.276118	0.782819	1	0.786
Tibet (Semi-Urban) vs. Mayaguez (Urban)	Coyote (Urban) vs. Tibet (Urban)	1.762	0.0800036	1	0.078
Tibet (Semi-Urban) vs. Mbalmayo (Semi-Urban)	Coyote (Urban) vs. Tibet (Urban)	-14.8411	5.13955e-36	9.42388e-32	0.001
Tibet (Semi-Urban) vs. all	Coyote (Urban) vs. Tibet (Urban)	-12.5613	5.50384e-23	1.00918e-18	0.001
Tibet (Semi-Urban) vs. all	Coyote (Urban) vs. Tibet (Urban)	-10.0868	1.63778e-20	3.00303e-16	0.001
Tibet (Semi-Urban) vs. Sparrow (Urban)	Coyote (Urban) vs. Tibet (Urban)	14.2913	0	0	0.001
Tibet (Semi-Urban) vs. Tibet (Rural)	Coyote (Urban) vs. Tibet (Urban)	-15.3883	4.68375e-32	8.58813e-28	0.001
Tibet (Semi-Urban) vs. Tibet (Semi-Urban)	Coyote (Urban) vs. Tibet (Urban)	-13.1107	6.39944e-24	1.1734e-19	0.001
Tibet (Semi-Urban) vs. Tibet (Urban)	Coyote (Urban) vs. Tibet (Urban)	-10.8225	2.79834e-20	5.13104e-16	0.001
Tibet (Semi-Urban) vs. USA (Urban)	Coyote (Urban) vs. Tibet (Urban)	-11.9155	1.27185e-31	2.33207e-27	0.001
Tibet (Semi-Urban) vs. Venezuela (Rural)	Coyote (Urban) vs. Tibet (Urban)	-15.7484	2.04027e-43	3.74104e-39	0.001
Tibet (Semi-Urban) vs. Yaounde (Urban)	Coyote (Urban) vs. Tibet (Urban)	-15.045	8.66032e-39	1.58796e-34	0.001
Tibet (Urban) vs. Tibet (Urban)	Coyote (Urban) vs. Tibet (Urban)	-10.2328	1.66705e-17	3.0567e-13	0.001
USA (Urban) vs. Coyote (Rural)	Coyote (Urban) vs. Tibet (Urban)	3.83055	0.00012851	1	0.002
USA (Urban) vs. Coyote (Urban)	Coyote (Urban) vs. Tibet (Urban)	0.831239	0.405923	1	0.412
USA (Urban) vs. Mayaguez (Urban)	Coyote (Urban) vs. Tibet (Urban)	-2.34469	0.0191255	1	0.019
USA (Urban) vs. Mbalmayo (Semi-Urban)	Coyote (Urban) vs. Tibet (Urban)	-13.6042	2.14475e-41	3.93261e-37	0.001
USA (Urban) vs. all	Coyote (Urban) vs. Tibet (Urban)	-10.33	7.94352e-24	1.45652e-19	0.001
USA (Urban) vs. all	Coyote (Urban) vs. Tibet (Urban)	-23.6038	1.8267e-117	3.34943e-113	0.001
USA (Urban) vs. Sparrow (Urban)	Coyote (Urban) vs. Tibet (Urban)	36.0695	0	0	0.001
USA (Urban) vs. Tibet (Rural)	Coyote (Urban) vs. Tibet (Urban)	-11.1899	3.39619e-28	6.22725e-24	0.001
USA (Urban) vs. Tibet (Urban)	Coyote (Urban) vs. Tibet (Urban)	-19.5318	1.41478e-77	2.59415e-73	0.001
USA (Urban) vs. USA (Urban)	Coyote (Urban) vs. Tibet (Urban)	-26.8089	3.41047e-156	6.25345e-152	0.001
USA (Urban) vs. Venezuela (Rural)	Coyote (Urban) vs. Tibet (Urban)	-16.4331	8.68446e-60	1.59238e-55	0.001
Venezuela (Rural) vs. Venezuela (Rural)	Coyote (Urban) vs. Tibet (Urban)	-22.8308	8.83646e-89	1.62025e-84	0.001
Yaounde (Urban) vs. Coyote (Rural)	Coyote (Urban) vs. Tibet (Urban)	4.01503	6.2214e-05	1	0.001
Yaounde (Urban) vs. Coyote (Urban)	Coyote (Urban) vs. Tibet (Urban)	-0.851857	0.394848	1	0.39
Yaounde (Urban) vs. Mayaguez (Urban)	Coyote (Urban) vs. Tibet (Urban)	-0.0288068	0.977034	1	0.981
Yaounde (Urban) vs. Mbalmayo (Semi-Urban)	Coyote (Urban) vs. Tibet (Urban)	-18.8656	2.76741e-64	5.07432e-60	0.001
Yaounde (Urban) vs. all	Coyote (Urban) vs. Tibet (Urban)	-11.3558	3.04583e-23	5.58484e-19	0.001
Yaounde (Urban) vs. all	Coyote (Urban) vs. Tibet (Urban)	-15.122	1.86439e-45	3.41855e-41	0.001
Yaounde (Urban) vs. Sparrow (Urban)	Coyote (Urban) vs. Tibet (Urban)	21.2732	0	0	0.001
Yaounde (Urban) vs. Tibet (Rural)	Coyote (Urban) vs. Tibet (Urban)	-14.6538	2.62129e-37	4.8064e-33	0.001
Yaounde (Urban) vs. Tibet (Urban)	Coyote (Urban) vs. Tibet (Urban)	-19.393	2.02989e-55	3.72201e-51	0.001
Yaounde (Urban) vs. USA (Urban)	Coyote (Urban) vs. Tibet (Urban)	-16.3202	9.56726e-59	1.75425e-54	0.001
Yaounde (Urban) vs. Venezuela (Rural)	Coyote (Urban) vs. Tibet (Urban)	-19.168	1.65904e-71	3.04201e-67	0.001
Yaounde (Urban) vs. Yaounde (Urban)	Coyote (Urban) vs. Tibet (Urban)	-19.9101	7.07641e-65	1.29753e-60	0.001
All between population	Coyote (Urban) vs. Venezuela (Rural)	-8.29813	1.06362e-16	1.95026e-12	0.001
All within population	Coyote (Urban) vs. Venezuela (Rural)	-44.911	0	0	0.001
Coyote (Rural) vs. Coyote (Rural)	Coyote (Urban) vs. Venezuela (Rural)	-27.1579	2.9256e-135	5.36437e-131	0.001
Coyote (Rural) vs. Coyote (Urban)	Coyote (Urban) vs. Venezuela (Rural)	-20.5779	2.19085e-77	4.01714e-73	0.001
Coyote (Rural) vs. Mayaguez (Urban)	Coyote (Urban) vs. Venezuela (Rural)	6.91258	9.02256e-12	1.65438e-07	0.001
Coyote (Rural) vs. Mbalmayo (Semi-Urban)	Coyote (Urban) vs. Venezuela (Rural)	14.6749	0	0	0.001
Coyote (Rural) vs. all	Coyote (Urban) vs. Venezuela (Rural)	13.7813	0	0	0.001
Coyote (Rural) vs. Sparrow (Urban)	Coyote (Urban) vs. Venezuela (Rural)	15.7195	0	0	0.001
Coyote (Rural) vs. Tibet (Rural)	Coyote (Urban) vs. Venezuela (Rural)	10.409	0	0	0.001
Coyote (Rural) vs. Tibet (Urban)	Coyote (Urban) vs. Venezuela (Rural)	6.355	3.51042e-10	6.4367e-06	0.001
Coyote (Rural) vs. Venezuela (Rural)	Coyote (Urban) vs. Venezuela (Rural)	6.78967	1.41789e-11	2.59984e-07	0.001
Coyote (Urban) vs. Coyote (Urban)	Coyote (Urban) vs. Venezuela (Rural)	-14.2706	5.37875e-38	9.86248e-34	0.001
Coyote (Urban) vs. Mbalmayo (Semi-Urban)	Coyote (Urban) vs. Venezuela (Rural)	1.7641	0.0782344	1	0.066
Coyote (Urban) vs. Sparrow (Urban)	Coyote (Urban) vs. Venezuela (Rural)	10.1428	0	0	0.001
Malawi (Rural) vs. Coyote (Rural)	Coyote (Urban) vs. Venezuela (Rural)	19.1317	0	0	0.001
Malawi (Rural) vs. Coyote (Urban)	Coyote (Urban) vs. Venezuela (Rural)	0.605292	0.545135	1	0.546
Malawi (Rural) vs. Malawi (Rural)	Coyote (Urban) vs. Venezuela (Rural)	-76.3949	0	0	0.001
Malawi (Rural) vs. Maricao (Rural)	Coyote (Urban) vs. Venezuela (Rural)	23.546	0	0	0.001
Malawi (Rural) vs. Mayaguez (Urban)	Coyote (Urban) vs. Venezuela (Rural)	11.467	0	0	0.001
Malawi (Rural) vs. Mbalmayo (Semi-Urban)	Coyote (Urban) vs. Venezuela (Rural)	-51.9597	0	0	0.001
Malawi (Rural) vs. all	Coyote (Urban) vs. Venezuela (Rural)	-34.4052	1.61544e-143	2.96206e-139	0.001
Malawi (Rural) vs. all	Coyote (Urban) vs. Venezuela (Rural)	-24.4213	6.38667e-113	1.17106e-108	0.001
Malawi (Rural) vs. Sparrow (Rural)	Coyote (Urban) vs. Venezuela (Rural)	19.9965	0	0	0.001
Malawi (Rural) vs. Sparrow (Urban)	Coyote (Urban) vs. Venezuela (Rural)	28.0541	0	0	0.001
Malawi (Rural) vs. Tibet (Rural)	Coyote (Urban) vs. Venezuela (Rural)	-40.1108	1.28459e-194	2.35543e-190	0.001
Malawi (Rural) vs. Tibet (Semi-Urban)	Coyote (Urban) vs. Venezuela (Rural)	-29.7782	3.38789e-132	6.21203e-128	0.001
Malawi (Rural) vs. Tibet (Urban)	Coyote (Urban) vs. Venezuela (Rural)	-28.0343	2.07778e-121	3.80981e-117	0.001
Malawi (Rural) vs. USA (Urban)	Coyote (Urban) vs. Venezuela (Rural)	-35.0064	2.25104e-256	4.12751e-252	0.001
Malawi (Rural) vs. Venezuela (Rural)	Coyote (Urban) vs. Venezuela (Rural)	-48.6348	0	0	0.001
Malawi (Rural) vs. Yaounde (Urban)	Coyote (Urban) vs. Venezuela (Rural)	-39.7568	1.79053e-253	3.28312e-249	0.001
Maricao (Rural) (non-cristatellus)noncristatellus vs. Coyote (Rural)	Coyote (Urban) vs. Venezuela (Rural)	20.4819	0	0	0.001
Maricao (Rural) (non-cristatellus)noncristatellus vs. Coyote (Urban)	Coyote (Urban) vs. Venezuela (Rural)	9.35055	0	0	0.001
Maricao (Rural) (non-cristatellus)noncristatellus vs. Malawi (Rural)	Coyote (Urban) vs. Venezuela (Rural)	23.4888	0	0	0.001
Maricao (Rural) (non-cristatellus)noncristatellus vs. Maricao (Rural)	Coyote (Urban) vs. Venezuela (Rural)	-29.1485	4.88268e-147	8.95288e-143	0.001
Maricao (Rural) (non-cristatellus)noncristatellus vs. Maricao (Rural) (non-cristatellus)noncristatellus	Coyote (Urban) vs. Venezuela (Rural)	-28.1183	3.06969e-123	5.62859e-119	0.001
Maricao (Rural) (non-cristatellus)noncristatellus vs. Mayaguez (Urban)	Coyote (Urban) vs. Venezuela (Rural)	-19.1796	5.26283e-66	9.64993e-62	0.001
Maricao (Rural) (non-cristatellus)noncristatellus vs. Mbalmayo (Semi-Urban)	Coyote (Urban) vs. Venezuela (Rural)	12.2444	0	0	0.001
Maricao (Rural) (non-cristatellus)noncristatellus vs. all	Coyote (Urban) vs. Venezuela (Rural)	5.56339	4.30951e-08	0.000790192	0.001
Maricao (Rural) (non-cristatellus)noncristatellus vs. all	Coyote (Urban) vs. Venezuela (Rural)	5.66485	1.86897e-08	0.000342694	0.001
Maricao (Rural) (non-cristatellus)noncristatellus vs. Sparrow (Rural)	Coyote (Urban) vs. Venezuela (Rural)	15.9004	0	0	0.001
Maricao (Rural) (non-cristatellus)noncristatellus vs. Sparrow (Urban)	Coyote (Urban) vs. Venezuela (Rural)	16.4547	0	0	0.001
Maricao (Rural) (non-cristatellus)noncristatellus vs. Tibet (Rural)	Coyote (Urban) vs. Venezuela (Rural)	8.70282	0	0	0.001
Maricao (Rural) (non-cristatellus)noncristatellus vs. Tibet (Semi-Urban)	Coyote (Urban) vs. Venezuela (Rural)	8.19123	1.33227e-15	2.44285e-11	0.001
Maricao (Rural) (non-cristatellus)noncristatellus vs. Tibet (Urban)	Coyote (Urban) vs. Venezuela (Rural)	5.8126	9.80283e-09	0.000179745	0.001
Maricao (Rural) (non-cristatellus)noncristatellus vs. USA (Urban)	Coyote (Urban) vs. Venezuela (Rural)	18.3771	0	0	0.001
Maricao (Rural) (non-cristatellus)noncristatellus vs. Venezuela (Rural)	Coyote (Urban) vs. Venezuela (Rural)	17.2862	0	0	0.001
Maricao (Rural) (non-cristatellus)noncristatellus vs. Yaounde (Urban)	Coyote (Urban) vs. Venezuela (Rural)	10.3444	0	0	0.001
Maricao (Rural) vs. Coyote (Rural)	Coyote (Urban) vs. Venezuela (Rural)	20.9062	0	0	0.001
Maricao (Rural) vs. Coyote (Urban)	Coyote (Urban) vs. Venezuela (Rural)	8.68537	0	0	0.001
Maricao (Rural) vs. Maricao (Rural)	Coyote (Urban) vs. Venezuela (Rural)	-28.2836	8.58833e-128	1.57476e-123	0.001
Maricao (Rural) vs. Mayaguez (Urban)	Coyote (Urban) vs. Venezuela (Rural)	-24.4389	1.85271e-96	3.39713e-92	0.001
Maricao (Rural) vs. Mbalmayo (Semi-Urban)	Coyote (Urban) vs. Venezuela (Rural)	11.4464	0	0	0.001
Maricao (Rural) vs. all	Coyote (Urban) vs. Venezuela (Rural)	5.23906	2.35889e-07	0.00432526	0.001
Maricao (Rural) vs. all	Coyote (Urban) vs. Venezuela (Rural)	2.62809	0.00869662	1	0.008
Maricao (Rural) vs. Sparrow (Urban)	Coyote (Urban) vs. Venezuela (Rural)	10.9944	0	0	0.001
Maricao (Rural) vs. Tibet (Rural)	Coyote (Urban) vs. Venezuela (Rural)	8.73471	0	0	0.001
Maricao (Rural) vs. Tibet (Semi-Urban)	Coyote (Urban) vs. Venezuela (Rural)	7.48461	2.34257e-13	4.29534e-09	0.001
Maricao (Rural) vs. Tibet (Urban)	Coyote (Urban) vs. Venezuela (Rural)	5.16959	3.12677e-07	0.00573324	0.001
Maricao (Rural) vs. USA (Urban)	Coyote (Urban) vs. Venezuela (Rural)	10.8052	0	0	0.001
Maricao (Rural) vs. Venezuela (Rural)	Coyote (Urban) vs. Venezuela (Rural)	15.4837	0	0	0.001
Maricao (Rural) vs. Yaounde (Urban)	Coyote (Urban) vs. Venezuela (Rural)	8.06217	1.55431e-15	2.84999e-11	0.001
Mayaguez (Urban) vs. Mayaguez (Urban)	Coyote (Urban) vs. Venezuela (Rural)	-15.8108	1.4133e-44	2.59143e-40	0.001
Mbalmayo (Semi-Urban) vs. Mbalmayo (Semi-Urban)	Coyote (Urban) vs. Venezuela (Rural)	-38.1484	3.54398e-161	6.49825e-157	0.001
Ngoantet (Rural) vs. Coyote (Rural)	Coyote (Urban) vs. Venezuela (Rural)	21.6705	0	0	0.001
Ngoantet (Rural) vs. Coyote (Urban)	Coyote (Urban) vs. Venezuela (Rural)	2.77445	0.00561838	1	0.003
Ngoantet (Rural) vs. Malawi (Rural)	Coyote (Urban) vs. Venezuela (Rural)	-48.4407	0	0	0.001
Ngoantet (Rural) vs. Maricao (Rural)	Coyote (Urban) vs. Venezuela (Rural)	20.9504	0	0	0.001
Ngoantet (Rural) vs. Maricao (Rural) (non-cristatellus)noncristatellus	Coyote (Urban) vs. Venezuela (Rural)	22.3778	0	0	0.001
Ngoantet (Rural) vs. Mayaguez (Urban)	Coyote (Urban) vs. Venezuela (Rural)	10.3984	0	0	0.001
Ngoantet (Rural) vs. Mbalmayo (Semi-Urban)	Coyote (Urban) vs. Venezuela (Rural)	-41.5085	1.02828e-272	1.88545e-268	0.001
Ngoantet (Rural) vs. all	Coyote (Urban) vs. Venezuela (Rural)	-32.3018	3.75541e-140	6.88591e-136	0.001
Ngoantet (Rural) vs. all	Coyote (Urban) vs. Venezuela (Rural)	-19.6087	3.64844e-79	6.68978e-75	0.001
Ngoantet (Rural) vs. Ngoantet (Rural)	Coyote (Urban) vs. Venezuela (Rural)	-37.5616	2.28867e-258	4.1965e-254	0.001
Ngoantet (Rural) vs. Sparrow (Rural)	Coyote (Urban) vs. Venezuela (Rural)	24.9251	0	0	0.001
Ngoantet (Rural) vs. Sparrow (Urban)	Coyote (Urban) vs. Venezuela (Rural)	33.7966	0	0	0.001
Ngoantet (Rural) vs. Tibet (Rural)	Coyote (Urban) vs. Venezuela (Rural)	-33.5149	8.74694e-166	1.60384e-161	0.001
Ngoantet (Rural) vs. Tibet (Semi-Urban)	Coyote (Urban) vs. Venezuela (Rural)	-25.7848	7.31573e-113	1.34141e-108	0.001
Ngoantet (Rural) vs. Tibet (Urban)	Coyote (Urban) vs. Venezuela (Rural)	-23.3163	2.07721e-96	3.80877e-92	0.001
Ngoantet (Rural) vs. USA (Urban)	Coyote (Urban) vs. Venezuela (Rural)	-22.7532	5.0553e-113	9.2694e-109	0.001
Ngoantet (Rural) vs. Venezuela (Rural)	Coyote (Urban) vs. Venezuela (Rural)	-38.1274	2.04038e-264	3.74123e-260	0.001
Ngoantet (Rural) vs. Yaounde (Urban)	Coyote (Urban) vs. Venezuela (Rural)	-33.4336	1.1434e-204	2.09654e-200	0.001
Sparrow (Rural) vs. Coyote (Rural)	Coyote (Urban) vs. Venezuela (Rural)	18.9221	0	0	0.001
Sparrow (Rural) vs. Coyote (Urban)	Coyote (Urban) vs. Venezuela (Rural)	8.81555	0	0	0.001
Sparrow (Rural) vs. Maricao (Rural)	Coyote (Urban) vs. Venezuela (Rural)	14.6989	0	0	0.001
Sparrow (Rural) vs. Mayaguez (Urban)	Coyote (Urban) vs. Venezuela (Rural)	8.65205	0	0	0.001
Sparrow (Rural) vs. Mbalmayo (Semi-Urban)	Coyote (Urban) vs. Venezuela (Rural)	12.8478	0	0	0.001
Sparrow (Rural) vs. all	Coyote (Urban) vs. Venezuela (Rural)	5.6614	2.61632e-08	0.000479729	0.001
Sparrow (Rural) vs. all	Coyote (Urban) vs. Venezuela (Rural)	14.1584	0	0	0.001
Sparrow (Rural) vs. Sparrow (Rural)	Coyote (Urban) vs. Venezuela (Rural)	-10.7108	1.03688e-24	1.90121e-20	0.001
Sparrow (Rural) vs. Sparrow (Urban)	Coyote (Urban) vs. Venezuela (Rural)	-11.6234	6.23861e-30	1.14391e-25	0.001
Sparrow (Rural) vs. Tibet (Rural)	Coyote (Urban) vs. Venezuela (Rural)	8.15387	2.44249e-15	4.47855e-11	0.001
Sparrow (Rural) vs. Tibet (Semi-Urban)	Coyote (Urban) vs. Venezuela (Rural)	8.11129	3.10862e-15	5.69997e-11	0.001
Sparrow (Rural) vs. Tibet (Urban)	Coyote (Urban) vs. Venezuela (Rural)	7.95185	1.02141e-14	1.87285e-10	0.001
Sparrow (Rural) vs. USA (Urban)	Coyote (Urban) vs. Venezuela (Rural)	42.3595	0	0	0.001
Sparrow (Rural) vs. Venezuela (Rural)	Coyote (Urban) vs. Venezuela (Rural)	16.6798	0	0	0.001
Sparrow (Rural) vs. Yaounde (Urban)	Coyote (Urban) vs. Venezuela (Rural)	15.0655	0	0	0.001
Sparrow (Urban) vs. Sparrow (Urban)	Coyote (Urban) vs. Venezuela (Rural)	-12.024	8.03495e-32	1.47329e-27	0.001
Tibet (Rural) vs. Tibet (Rural)	Coyote (Urban) vs. Venezuela (Rural)	-26.1963	2.81446e-89	5.16059e-85	0.001
Tibet (Semi-Urban) vs. Coyote (Rural)	Coyote (Urban) vs. Venezuela (Rural)	8.67871	0	0	0.001
Tibet (Semi-Urban) vs. Coyote (Urban)	Coyote (Urban) vs. Venezuela (Rural)	1.35195	0.177058	1	0.174
Tibet (Semi-Urban) vs. Mayaguez (Urban)	Coyote (Urban) vs. Venezuela (Rural)	2.88051	0.00415657	1	0.003
Tibet (Semi-Urban) vs. Mbalmayo (Semi-Urban)	Coyote (Urban) vs. Venezuela (Rural)	-23.6985	6.532e-86	1.19771e-81	0.001
Tibet (Semi-Urban) vs. all	Coyote (Urban) vs. Venezuela (Rural)	-16.4111	6.90702e-47	1.26647e-42	0.001
Tibet (Semi-Urban) vs. all	Coyote (Urban) vs. Venezuela (Rural)	-16.1627	1.1939e-48	2.18913e-44	0.001
Tibet (Semi-Urban) vs. Sparrow (Urban)	Coyote (Urban) vs. Venezuela (Rural)	11.4822	0	0	0.001
Tibet (Semi-Urban) vs. Tibet (Rural)	Coyote (Urban) vs. Venezuela (Rural)	-21.7115	1.13474e-71	2.08065e-67	0.001
Tibet (Semi-Urban) vs. Tibet (Semi-Urban)	Coyote (Urban) vs. Venezuela (Rural)	-14.1174	4.23845e-37	7.77163e-33	0.001
Tibet (Semi-Urban) vs. Tibet (Urban)	Coyote (Urban) vs. Venezuela (Rural)	-13.8634	1.52423e-36	2.79482e-32	0.001
Tibet (Semi-Urban) vs. USA (Urban)	Coyote (Urban) vs. Venezuela (Rural)	-22.4435	1.2434e-100	2.2799e-96	0.001
Tibet (Semi-Urban) vs. Venezuela (Rural)	Coyote (Urban) vs. Venezuela (Rural)	-25.1051	5.22907e-99	9.58802e-95	0.001
Tibet (Semi-Urban) vs. Yaounde (Urban)	Coyote (Urban) vs. Venezuela (Rural)	-23.5846	6.6851e-88	1.22578e-83	0.001
Tibet (Urban) vs. Tibet (Urban)	Coyote (Urban) vs. Venezuela (Rural)	-11.0068	7.78788e-25	1.42799e-20	0.001
USA (Urban) vs. Coyote (Rural)	Coyote (Urban) vs. Venezuela (Rural)	16.3278	0	0	0.001
USA (Urban) vs. Coyote (Urban)	Coyote (Urban) vs. Venezuela (Rural)	6.93991	4.91074e-12	9.00433e-08	0.001
USA (Urban) vs. Mayaguez (Urban)	Coyote (Urban) vs. Venezuela (Rural)	0.953646	0.34035	1	0.328
USA (Urban) vs. Mbalmayo (Semi-Urban)	Coyote (Urban) vs. Venezuela (Rural)	-25.4746	5.9628e-135	1.09334e-130	0.001
USA (Urban) vs. all	Coyote (Urban) vs. Venezuela (Rural)	-14.7092	2.14771e-45	3.93805e-41	0.001
[truncated: 10,722 more rows]
