# Supplementary material for: Humanization of wildlife gut microbiota in urban environments
Source: eLife. 2022 May 31;11:e76381. doi: 10.7554/eLife.76381 (PMC9203057; doi:10.7554/eLife.76381)
Supplement: Supplementary file 7. [file elife-76381-supp7.xlsx]

## Sheet: Sheet1
Table S7. ANCOM statistics from comparisons of urban and rural populations (results from analyses run on individual wildlife species and human datasets)															Table S7. ANCOM statistics from comparisons of urban and rural populations (results from analyses run on all wildife populations combined with host species as a covariate)
taxa_id	W	clr_mean_diff	above_W_0.5	above_W_0.7	overrepresented	Kingdom	Phylum	Order	Family	Genus	host_species	sequence			taxa_id	W	clr_mean_diff	detected_0.5	detected_0.7	overrepresented	Kingdom	Phylum	Order	Family	Genus	sequence
ASV12714	783	-2.13193	TRUE	TRUE	Rural	d__Bacteria	Bacteroidota	Bacteroidales	Bacteroidaceae	Bacteroides	Anolis	TACGGAGGATCCGAGCGTTATCCGGATTTATTGGGTTTAAAGGGTGCGTAGGTGGACGTTTAAGTCAGTTGTGAAAGTTTGCGGCTCAACCGTAAAATTG			ASV24363	244	0.694182	TRUE	TRUE	Urban	d__Bacteria	Proteobacteria	Pseudomonadales	Pseudomonadaceae	Pseudomonas	TACAGAGGGTGCAAGCGTTAATCGGAATTACTGGGCGTAAAGCGCGCGTAGGTGGTTTGTTAAGTTGGATGTGAAATCCCCGGGCTCAACCTGGGAACTG
ASV13422	474	-1.64671	TRUE	FALSE	Rural	d__Bacteria	Bacteroidota	Bacteroidales	Tannerellaceae	uncultured	Anolis	TACGGAGGATGCGAGCGTTATCCGGATTTATTGGGTTTAAAGGGTGCGTAGGTGGCCATATAAGTCAGCGGTGAAAGTTTGTCGCTCAACGATAAAATTG			ASV17782	242	1.2863	TRUE	TRUE	Urban	d__Bacteria	Proteobacteria	Enterobacterales	Enterobacteriaceae	NA	TACGGAGGGTGCAAGCGTTAATCGGAATTACTGGGCGTAAAGCGCACGCAGGCGGTCTGTCAAGTCGGATGTGAAATCCCCGGGCTCAACCTGGGAACTG
ASV16286	624	1.32829	TRUE	TRUE	Urban	d__Bacteria	Firmicutes	Erysipelotrichales	Erysipelatoclostridiaceae	Erysipelatoclostridium	Anolis	TACGTAGGTGGCAAGCGTTATCCGGAATTATTGGGCGTAAAGAGGGAGCAGGCGGCAGCAAGGGTCTGTGGTGAAAGACTGAAGCTTAACTTCAGTAAGC			ASV13041	221	-0.324161	TRUE	TRUE	Rural	d__Bacteria	Proteobacteria	Pseudomonadales	Moraxellaceae	Acinetobacter	TACAGAGGGTGCGAGCGTTAATCGGATTTACTGGGCGTAAAGCGTGCGTAGGCGGCTTATTAAGTCGGATGTGAAATCCCCGAGCTTAACTTGGGAATTG
ASV22066	535	-0.0213643	TRUE	FALSE	Rural	d__Bacteria	Proteobacteria	Rhodospirillales	uncultured	uncultured	Anolis	TACGAAGGGGGCGAGCGTTGTTCGGAATTACTGGGCGTAAAGGGAGTGTAGGCGGTTGTGTAAGATAGCGGTGAAATCCCGGGGCTTAACCTCGGAATAG			ASV1351	200	-0.337641	TRUE	TRUE	Rural	d__Bacteria	Firmicutes	Clostridiales	Clostridiaceae	Candidatus_Arthromitus	TACGTAGGTGGCAAGCGTTGTTCGGAATAACTGGGCGTAAAGGATGCGTAGGCGGTTAAACAAGTTATATGTTAAATATATAGGCTTAACCTGTAGAGAG
ASV2468	462	0.103625	TRUE	FALSE	Urban	d__Bacteria	Firmicutes	Peptostreptococcales-Tissierellales	Anaerovoracaceae	Amnipila	Anolis	TACGTAGGGGGCAAGCGTTATCCGGAATTATTGGGCGTAAAGAGTGCGTAGGTGGTCTTCTAAGCGTGGGGTGAAAGGCAGTGGCTTAACCATTGTAAGC			ASV32186	200	0.276337	TRUE	TRUE	Urban	d__Bacteria	Bacteroidota	Bacteroidales	Bacteroidaceae	Bacteroides	TACGGAGGATCCGAGCGTTATCCGGATTTATTGGGTTTAAAGGGAGCGTAGATGGATGTTTAAGTCAGTTGTGAAAGTTTGCGGCTCAACCGTAAAATTG
ASV30966	453	-1.43814	TRUE	FALSE	Rural	d__Bacteria	Bacteroidota	Bacteroidales	Tannerellaceae	Parabacteroides	Anolis	TACGGAGGATCCGAGCGTTATCCGGATTTATTGGGTTTAAAGGGTGCGTAGGTGGCTTTTTAAGTCAGCGGTGAAAGTTTGTGGCTCAACCATAAAATTG			ASV10547	178	0.178134	TRUE	FALSE	Urban	d__Bacteria	Actinobacteriota	Micrococcales	Micrococcaceae	Rothia	TACGTAGGGCGCGAGCGTTGTCCGGAATTATTGGGCGTAAAGAGCTTGTAGGCGGTTTGTCGCGTCTGCTGTGAAAGGCCGGAGCTTAACTCCGTGTATT
ASV32186	793	2.86326	TRUE	TRUE	Urban	d__Bacteria	Bacteroidota	Bacteroidales	Bacteroidaceae	Bacteroides	Anolis	TACGGAGGATCCGAGCGTTATCCGGATTTATTGGGTTTAAAGGGAGCGTAGATGGATGTTTAAGTCAGTTGTGAAAGTTTGCGGCTCAACCGTAAAATTG			ASV19869	160	-0.816634	TRUE	FALSE	Rural	d__Bacteria	Firmicutes	Mycoplasmatales	Mycoplasmataceae	Ureaplasma	TACATAGGATGCAAGCGTTATCCGGATTTACTGGGCGTAAAACGAGCGCGGGCGGATTAGCAAGTTTGGTATGAAAGGCTTTTGCTTAACAAAAGTTTGT
ASV32192	733	1.94548	TRUE	TRUE	Urban	d__Bacteria	Firmicutes	Acidaminococcales	Acidaminococcaceae	Phascolarctobacterium	Anolis	TACGTAGGTGGCGAGCGTTGTCCGGAATTATTGGGCGTAAAGAGCATGTAGGCGGCTTAATAAGTCGAGCGTGAAAATGCGGGGCTCAACCCCGTATGGC			ASV13765	146	-0.834117	TRUE	FALSE	Rural	d__Bacteria	Fusobacteriota	Fusobacteriales	Fusobacteriaceae	Fusobacterium	TACGTATGTCGCAAGCGTTATCCGGATTTATTGGGCGTAAAGCGCGTCTAGGCGGTTTGGTAAGTCTGATGTGGAAATGCGGGGCTCAACTCCGTATTGC
ASV35048	441	1.1713	TRUE	FALSE	Urban	d__Bacteria	Firmicutes	Oscillospirales	Oscillospiraceae	NA	Anolis	TACGTAGGTGGCAAGCGTTATCCGGATTTACTGGGTGTAAAGGGCGTGTAGGCGGGATGGTAAGTCAGGCGTGAAATTCCAGGGCTCAACCCTGGAACTG			ASV38515	141	0.150587	TRUE	FALSE	Urban	d__Bacteria	Proteobacteria	Pseudomonadales	Moraxellaceae	Acinetobacter	TACAGAGGGTGCGAGCGTTAATCGGATTTACTGGGCGTAAAGCGTGCGTAGGCGGCTTTTTAAGTCGGATGTGAAATCCCCGAGCTTAACTTGGGAATTG
ASV35840	624	-2.20654	TRUE	TRUE	Rural	d__Bacteria	Bacteroidota	Bacteroidales	Bacteroidaceae	Bacteroides	Anolis	TACGGAGGATCCGAGCGTTATCCGGATTTATTGGGTTTAAAGGGAGCGTAGGTGGATTGTTAAGTCAGTTGTGAAAGTTTGCGGCTCAACCGTAAAATTG			ASV944	131	-0.706355	TRUE	FALSE	Rural	d__Bacteria	Proteobacteria	Diplorickettsiales	Diplorickettsiaceae	Rickettsiella	TACAGAGGGTGCAAGCGTTAATCAGAATGACTGGGCGTAAAGGGCGTGTAGGTGGTTAATTAGGTTTGATGTGAAATCCCCGGGCTTAACCTGGGAATTG
ASV44266	675	-1.13474	TRUE	TRUE	Rural	d__Bacteria	Firmicutes	Lachnospirales	Lachnospiraceae	NA	Anolis	TACGTAGGGGGCAAGCGTTATCCGGATTTACTGGGTGTAAAGGGAGCGTAGACGGCTGTGCAAGCCAGATGTGAAAACGCGGGGCTCAACCCCGCGACTG			ASV5684	130	-0.344192	TRUE	FALSE	Rural	d__Bacteria	Firmicutes	Lactobacillales	NA	NA	TACGTAGGTGGCAAGCGTTGTCCGGATTTATTGGGCGTAAAGCGAGCGCAGGCGGTCTTTTAAGTCTGATGTGAAAGCCCACGGCTTAACCGTGGAGGGT
ASV46993	617	-0.450968	TRUE	TRUE	Rural	d__Bacteria	Firmicutes	Oscillospirales	NA	NA	Anolis	TACGTAGGGAGCGAGCGTTGTCCGGAATTACTGGGTGTAAAGGGAGCGTAGGCGGGATGACAAGTTGAATGTATAAACCATCGGCTTAACTGGTGGAGGC
ASV472	715	-1.16421	TRUE	TRUE	Rural	d__Bacteria	Bacteroidota	Bacteroidales	NA	NA	Anolis	TACGGAAGATGCGAGCGTTATCCGGATTTATTGGGTTTAAAGGGTGCGTAGGCGGACCAGAAAGTCAGCGGTGAAATCTCTCGGCTTAACCGAGAAACTG
ASV5106	636	-0.668884	TRUE	TRUE	Rural	d__Bacteria	Bacteroidota	Bacteroidales	Rikenellaceae	Alistipes	Anolis	TACGGAGGATTCAAGCGTTATCCGGATTTATTGGGTTTAAAGGGTGCGTAGGCGGTTTGATAAGTTATAGGTGAAAACTCGATGCTTAACATCGAGCGTG
ASV6384	730	0.578536	TRUE	TRUE	Urban	d__Bacteria	Firmicutes	Veillonellales-Selenomonadales	Selenomonadaceae	NA	Anolis	TACGTAGGTGGCGAGCGTTGTCCGGAATTATTGGGCGTAAAGGGAGCGCAGGTGGATGATTAAGTCTTATTTAAAAGTGCGGGGCTCAACCCCGTGAGGG
ASV6794	529	-0.93596	TRUE	FALSE	Rural	d__Bacteria	Desulfobacterota	Desulfovibrionales	Desulfovibrionaceae	Bilophila	Anolis	TACGGAGGGTGCAAGCGTTAATCGGAATCACTGGGCGTAAAGCGCACGTAGGCGGCTTGGTAAGTCAGGGGTGAAATCCCACAGCCCAACTGTGGAACTG
ASV7603	425	-1.42191	TRUE	FALSE	Rural	d__Bacteria	Bacteroidota	Bacteroidales	Rikenellaceae	Alistipes	Anolis	TACGGAGGATTCAAGCGTTATCCGGATTTATTGGGTTTAAAGGGTGCGTAGGCGGTTAGATAAGTTAGAGGTGAAATATCAGGGCTCAACCCTGAAACTG
ASV9541	453	-0.422552	TRUE	FALSE	Rural	d__Bacteria	Bacteroidota	Bacteroidales	Marinifilaceae	Odoribacter	Anolis	TACGGAGGATGCGAGCGTTATCCGGATTTATTGGGTTTAAAGGGTGCGTAGGCGGCTGATTAAGTTAGTGGTAAAACGGCCGGGCTAAACCTGGCTTCGC
ASV9679	422	-0.00548857	TRUE	FALSE	Rural	d__Bacteria	Bacteroidota	Bacteroidales	Marinifilaceae	Odoribacter	Anolis	TACGGAGGATGCGAGCGTTATCCGGATTTATTGGGTTTAAAGGGTGCGTAGGCGGTATATTAAGTTAGTGGTTAAACGTCGGGGCTTCACCTTGATTTGC
ASV11365	514	1.31309	TRUE	TRUE	Urban	d__Bacteria	Bacteroidota	Bacteroidales	Porphyromonadaceae	Porphyromonas	Human (Cameroon)	TACGGAGGATGCGAGCGTTATCCGGAATTATTGGGTTTAAAGGGTGCGTAGGTTGCAAGGGAAGTCAGGGGTGAAAAGCTGTAGCTCAACTATGGTCTTG
ASV12068	596	0.835447	TRUE	TRUE	Urban	d__Bacteria	Bacteroidota	Bacteroidales	Rikenellaceae	Alistipes	Human (Cameroon)	TACGGAGGATCCAAGCGTTATCCGGATTTATTGGGTTTAAAGGGTGCGTAGGCGGTTTGATAAGTTAGAGGTGAAATACCGGTGCTTAACACCGGAACTG
ASV12168	585	0.0717162	TRUE	TRUE	Urban	d__Bacteria	Firmicutes	Erysipelotrichales	Erysipelatoclostridiaceae	Erysipelatoclostridium	Human (Cameroon)	TACGTAGGTGGCAAGCGTTATCCGGAATTATTGGGCGTAAAGAGGGAGCAGGCGGCAATAGAGGTCTGTGGTAAAAGGCTGAAGCTTAACTTCAGTAAGC
ASV12312	450	-0.0597487	TRUE	FALSE	Rural	d__Bacteria	Firmicutes	Lachnospirales	Lachnospiraceae	Lachnospira	Human (Cameroon)	TACGTATGGAGCAAGCGTTATCCGGATTTACTGGGTGTAAAGGGAGTGTAGGTGGTATCACAAGTCAGAAGTGAAAGCCCGGGGCTCAACCCCGGGACTG
ASV12654	581	-0.277569	TRUE	TRUE	Rural	d__Bacteria	Firmicutes	Clostridiales	Clostridiaceae	Clostridium_sensu_stricto_1	Human (Cameroon)	TACGTAGGTGGCGAGCGTTATCCGGATTTACTGGGCGTAAAGGGAGCGTAGGCGGATGATTAAGTGGGATGTGAAATACCCGGGCTCAACTTGGGTGCTG
ASV13367	414	0.337753	TRUE	FALSE	Urban	d__Bacteria	Proteobacteria	Burkholderiales	NA	NA	Human (Cameroon)	TACGTAGGGTGCAAGCGTTAATCGGAATTACTGGGCGTAAAGCGTGCGCAGGCGGTTCTGTAAGACAGATGTGAAATCCCCGGGCTCAACCTGGGAATTG
ASV13634	606	-0.674578	TRUE	TRUE	Rural	d__Bacteria	Proteobacteria	Burkholderiales	Sutterellaceae	Parasutterella	Human (Cameroon)	TACGTAGGGTGCGAGCGTTAATCGGAATTACTGGGCGTAAAGGGTGCGCAGGCGGTTGAGTAAGACAGATGTGAAATCCCCGAGCTTAACTCGGGAATGG
ASV13742	500	-0.766686	TRUE	FALSE	Rural	d__Bacteria	Bacteroidota	Bacteroidales	Prevotellaceae	Alloprevotella	Human (Cameroon)	TACGGAAGGTCCAGGCGTTATCCGGATTTATTGGGTTTAAAGGGAGCGCAGGCGGACCTTTAAGTCAGCTGTGAAATACGGCGGCTCAACCGTCGAACTG
ASV14094	551	-0.654015	TRUE	TRUE	Rural	d__Bacteria	Firmicutes	Veillonellales-Selenomonadales	Veillonellaceae	Dialister	Human (Cameroon)	TACGTAGGTGGCAAGCGTTGTCCGGAATTATTGGGCGTAAAGCGCGCGCAGGCGGCTTCTTAAGTCCATCTTAAAAGTGCGGGGCTTAACCCCGTGATGG
ASV14883	548	-0.0109801	TRUE	TRUE	Rural	d__Bacteria	Firmicutes	Oscillospirales	Oscillospiraceae	UCG-005	Human (Cameroon)	TACGTAGGTGGCAAGCGTTGTCCGGATTTACTGGGTGTAAAGGGCGTGTAGGCGGAGATGCAAGTCAGATGTGAAATCCTCGGGCTTAACCCGGGAACTG
ASV14919	513	0.102629	TRUE	TRUE	Urban	d__Bacteria	Actinobacteriota	Coriobacteriales	Eggerthellaceae	Enterorhabdus	Human (Cameroon)	TACGTAGGGGGCGAGCGTTATCCGGAATGATTGGGCGTAAAGCGCGCGCAGGCGGCCGCTCAAGCGGGACCTCTAACCCCGGGGCTCAACCCCGGGCCGG
ASV16047	476	0.0162039	TRUE	FALSE	Urban	d__Bacteria	Actinobacteriota	Coriobacteriales	Eggerthellaceae	Slackia	Human (Cameroon)	TACGTAGGGGGCGAGCGTTATCCGGAATCATTGGGCGTAAAGCGCGCGCAGGCGGGCTTTCAAGCGGCGGCGTCGAAGCCGGGGGCTCAACCCCCGGAAG
ASV16158	455	0.0420035	TRUE	FALSE	Urban	d__Bacteria	Firmicutes	Christensenellales	Christensenellaceae	Christensenellaceae_R-7_group	Human (Cameroon)	TACGTAGGGGGCGAGCGTTGTCCGGAATGATTGGGCGTAAAGGGCGCGTAGGCGGCCTGCTAAGTCTGAAGTGAAAGTCCTGCTTTCAAGGTGGGAAGTG
ASV16527	601	-1.66009	TRUE	TRUE	Rural	d__Bacteria	Bacteroidota	Bacteroidales	Prevotellaceae	Prevotella	Human (Cameroon)	TACGGAAGGTCCGGGCGTTATCCGGATTTATTGGGTTTAAAGGGAGCGTAGGCCGGAGATTAAGCGTGTTGTGAAATGTAGACGCTCAACGTCTGCACTG
ASV17577	510	0.0686414	TRUE	TRUE	Urban	d__Bacteria	Firmicutes	Oscillospirales	Oscillospiraceae	Colidextribacter	Human (Cameroon)	TACGTAGGGAGCAAGCGTTATCCGGATTTACTGGGTGTAAAGGGCGTGTAGGCGGGACTGCAAGTCAGATGTGAAAACTATGGGCTTAACCCATAGCCTG
ASV18418	540	-0.151219	TRUE	TRUE	Rural	d__Bacteria	Firmicutes	Erysipelotrichales	Erysipelatoclostridiaceae	UCG-004	Human (Cameroon)	TACGTAGGTGGCAAGCGTTATCCGGAATTATTGGGCGTAAAGAGAGAGCAGGCGGTTATTCAAGTCTGAAGTGAAAAGCAGTGGCTTAACCATTGTAGGC
ASV18628	720	-2.04562	TRUE	TRUE	Rural	d__Bacteria	Proteobacteria	Aeromonadales	Succinivibrionaceae	Succinivibrio	Human (Cameroon)	TACGGAGGGTGCAAGCGTTAATCGGAATAACTGGGCGTAAAGGGCATGCAGGCGGTTCATCAAGTAGGATGTGAAATCCCCGGGCTCAACCTGGGAACAG
ASV19688	586	0.623535	TRUE	TRUE	Urban	d__Bacteria	Firmicutes	Oscillospirales	Ruminococcaceae	[Eubacterium]_siraeum_group	Human (Cameroon)	TACGTAGGTGGCAAGCGTTGTCCGGAATTACTGGGTGTAAAGGGAGTGTAGGCGGGATATCAAGTCAGAAGTGAAAATTACGGGCTCAACTCGTAACCTG
ASV21129	544	0.535852	TRUE	TRUE	Urban	d__Bacteria	Actinobacteriota	Coriobacteriales	Atopobiaceae	uncultured	Human (Cameroon)	TACGTAGGGGGCGAGCGTTGTCCGGATTCATTGGGCGTAAAGCGCGCGTAGGCGGCCCGGCAGGTCGGGGGTGAAAACACGGGGCCCAACCCCGTGCCTG
ASV2136	376	0.0279323	TRUE	FALSE	Urban	d__Bacteria	Verrucomicrobiota	Victivallales	Victivallaceae	Victivallis	Human (Cameroon)	TACGTAGGTGGCGAGCGTTGTTCGGATTTATTGGGCGTAAAGGGTCTGTAGGAGGTTCGTTAAATACGAGGTGAAATCCCGAAGCTCAACTTCGGAACTG
ASV23033	522	-0.292692	TRUE	TRUE	Rural	d__Bacteria	Firmicutes	NA	NA	NA	Human (Cameroon)	TACGTAGGGAGCGAGCGTTGTCCGGATTTACTGGGTGTAAAGGGTGCGTAGGCGGGATGGCAAGTCAGATGTGAAATACCGGGGCTTAACCCCGGGGCTG
ASV2356	699	0.494674	TRUE	TRUE	Urban	d__Bacteria	Firmicutes	Lachnospirales	Lachnospiraceae	Lachnospiraceae_UCG-004	Human (Cameroon)	TACGTAGGGGGCAAGCGTTATCCGGATTTACTGGGTGTAAAGGGAGCGTAGACGGCGACGCAAGTCTGAAGTGAAATACCCGGGCTCAACCTGGGAACTG
ASV23722	638	-0.512477	TRUE	TRUE	Rural	d__Bacteria	Firmicutes	Veillonellales-Selenomonadales	Selenomonadaceae	Anaerovibrio	Human (Cameroon)	TACGTAGGTGGCGAGCGTTGTCCGGAATTATTGGGCGTAAAGGGAGCGCAGGTGGGAAAGTAAGTCAGTCTTAAAAGTGCGGGGCTCAACCCCGTGAGGG
ASV23915	412	0.36763	TRUE	FALSE	Urban	d__Bacteria	Firmicutes	Oscillospirales	Ruminococcaceae	Subdoligranulum	Human (Cameroon)	AACGTAGGGTGCAAGCGTTGTCCGGAATTACTGGGTGTAAAGGGAGCGCAGGCGGACCGGCAAGTTGGGAGTGAAATCCATGGGCTCAACCCGTGAATTG
ASV24452	599	1.44814	TRUE	TRUE	Urban	d__Bacteria	Bacteroidota	Bacteroidales	Porphyromonadaceae	Porphyromonas	Human (Cameroon)	TACGGAGGATACGAGCGTTATCCGGATTTATTGGGTTTAAAGGGTGCGCAGGTGGTCTTGCAAGTCAGTGGTGAAAAGCTGAGGCTCAACCTCAGCCTTG
ASV24538	634	-0.184628	TRUE	TRUE	Rural	d__Bacteria	Firmicutes	Lachnospirales	Lachnospiraceae	Agathobacter	Human (Cameroon)	TACGTATGGAGCAAGCGTTATCCGGATTTACTGGGTGTAAAGGGAGCGTAGGCGGTCTTATAAGTCTGATGTGAAAGGCCGGGGCTCAACCCCGGGACTG
ASV24821	512	-0.0713557	TRUE	TRUE	Rural	d__Bacteria	Firmicutes	Lachnospirales	Lachnospiraceae	NA	Human (Cameroon)	TACGTAGGGGGCAAGCGTTATCCGGATTTACTGGGTGTAAAGGGAGCGTAGACGGCGGCGCAAGTCTGAAGTGAAATACCCGGGCTCAACCTGGGAACTG
ASV24916	596	-0.594923	TRUE	TRUE	Rural	d__Bacteria	Bacteroidota	Bacteroidales	Rikenellaceae	Rikenellaceae_RC9_gut_group	Human (Cameroon)	TACGGGGGATGCGAGCGTTATCCGGATTTATTGGGTTTAAAGGGTGCGTAGGCGGCGAATTAAGTCAGCGGTGAAAGACCGGGGCTCAACCCTGGAAGTG
ASV26471	394	-0.404403	TRUE	FALSE	Rural	d__Bacteria	Proteobacteria	Rhodospirillales	uncultured	uncultured	Human (Cameroon)	TACGAAGGGGGCGAGCGTTGTTCGGAATTACTGGGCGTAAAGGGTGTGTAGGCGGCTTTGTAAGATAGCGGTGAAATACCTGGGCTTAACCTAGGAACTG
ASV26712	445	0.507619	TRUE	FALSE	Urban	d__Bacteria	Bacteroidota	Bacteroidales	Tannerellaceae	Parabacteroides	Human (Cameroon)	TACGGAGGATCCGAGCGTTATCCGGATTTATTGGGTTTAAAGGGTGCGTAGGCGGCCTTTTAAGTCAGCGGTGAAAGTCTGTGGCTCAACCATAGAATTG
ASV26928	439	-0.862905	TRUE	FALSE	Rural	d__Bacteria	Firmicutes	Lachnospirales	Lachnospiraceae	[Ruminococcus]_torques_group	Human (Cameroon)	TACGTATGGTGCAAGCGTTATCCGGATTTACTGGGTGTAAAGGGAGCGTAGACGGAGTGGCAAGTCTGATGTGAAAACCCGGGGCTCAACCCCGGGACTG
ASV26987	375	-0.0319393	TRUE	FALSE	Rural	d__Bacteria	Firmicutes	Oscillospirales	Ruminococcaceae	Negativibacillus	Human (Cameroon)	TACGTAGGTGGCAAGCGTTGTCCGGAATTACTGGGTGTAAAGGGAGCGTAGGCGGGGAGACAAGTTGAATGTTTAAACTATCGGCTTAACTGATAGTCGC
ASV27507	621	-0.840561	TRUE	TRUE	Rural	d__Bacteria	Proteobacteria	Burkholderiales	Neisseriaceae	Neisseria	Human (Cameroon)	TACGTAGGGTGCGAGCGTTAATCGGAATTACTGGGCGTAAAGCGAGCGCAGACGGTTACTTAAGCAGGATGTGAAATCCCCGGGCTCAACCTGGGAACTG
ASV28876	486	0.0812982	TRUE	FALSE	Urban	d__Bacteria	Bacteroidota	Bacteroidales	Rikenellaceae	Alistipes	Human (Cameroon)	TACGGAGGATCCAAGCGTTATCCGGATTTATTGGGTTTAAAGGGTGCGTAGGCGGTTTAGTAAGTCAGCGGTGAAATTTTGGTGCTTAACACCAAACGTG
ASV30422	662	-1.17509	TRUE	TRUE	Rural	d__Bacteria	Bacteroidota	Bacteroidales	Prevotellaceae	uncultured	Human (Cameroon)	TACGGAAGGTCCAGGCGTTATCCGGATTTATTGGGTTTAAAGGGAGCGTAGGCCGCCCCTTAAGCGTGTTGTGAAATGCCGCGGCTCAACCGTGGCACTG
ASV31719	616	-1.02177	TRUE	TRUE	Rural	d__Bacteria	Firmicutes	Lachnospirales	Lachnospiraceae	NA	Human (Cameroon)	TACGTAGGGGGCAAGCGTTATCCGGATTTACTGGGTGTAAAGGGAGCGTAGACGGCGATGCAAGTCTGAAGTGAAATACCCGGGCTCAACCTGGGAACTG
ASV31787	534	-0.806841	TRUE	TRUE	Rural	d__Bacteria	Firmicutes	Lachnospirales	Lachnospiraceae	Coprococcus	Human (Cameroon)	TACGTAGGGGGCAAGCGTTATCCGGATTTACTGGGTGTAAAGGGAGCGTAGGCGGCGGAGCAAGTCAGAAGTGAAAGCCCGGGGCTCAACCCCGGGACGG
ASV32060	412	-0.504998	TRUE	FALSE	Rural	d__Bacteria	Bacteroidota	Bacteroidales	Prevotellaceae	Prevotellaceae_NK3B31_group	Human (Cameroon)	TACGGAAGGTCCGGGCGTTATCCGGATTTATTGGGTTTAAAGGGAGCGCAGGCCGTAGGCTAAGCGTGCCGTGAAATACCGTCGCTCAACGGCGGCCGTG
ASV32068	705	-0.927824	TRUE	TRUE	Rural	d__Bacteria	Firmicutes	Oscillospirales	Ruminococcaceae	Faecalibacterium	Human (Cameroon)	AACGTAGGTCACAAGCGTTGTCCGGAATTACTGGGTGTAAAGGGAGCGCAGGCGGGAAAGCAAGTTGGAAGTGAAATCCATGGGCTCAACCCATGAACTG
ASV32078	386	0.290005	TRUE	FALSE	Urban	d__Bacteria	Firmicutes	Lachnospirales	Lachnospiraceae	Lachnospiraceae_UCG-010	Human (Cameroon)	TACGTAGGGGGCAAGCGTTATCCGGAATTACTGGGTGTAAAGGGAGCGTAGGCGGCATGGTAAGTAAGATGTGAAAGCCCGAGGCTTAACCTCGAGGATT
ASV32186	641	1.64909	TRUE	TRUE	Urban	d__Bacteria	Bacteroidota	Bacteroidales	Bacteroidaceae	Bacteroides	Human (Cameroon)	TACGGAGGATCCGAGCGTTATCCGGATTTATTGGGTTTAAAGGGAGCGTAGATGGATGTTTAAGTCAGTTGTGAAAGTTTGCGGCTCAACCGTAAAATTG
ASV3254	407	-1.02833	TRUE	FALSE	Rural	d__Bacteria	Firmicutes	Oscillospirales	Ruminococcaceae	Faecalibacterium	Human (Cameroon)	AACGTAGGTCACAAGCGTTGTCCGGAATTACTGGGTGTAAAGGGAGCGCAGGCGGGCGATCAAGTTGGAAGTGAAATCCATGGGCTCAACCCATGAACTG
ASV32687	433	0.424106	TRUE	FALSE	Urban	d__Bacteria	Firmicutes	Oscillospirales	Oscillospiraceae	NK4A214_group	Human (Cameroon)	TACGTAGGTGGCGAGCGTTATCCGGATTTACTGGGTGTAAAGGGCGCGTAGGCGGGAATGCAAGTCAGATGTGAAATCCAAGGGCTCAACCCTTGAACTG
ASV32937	392	-0.873334	TRUE	FALSE	Rural	d__Bacteria	Firmicutes	Erysipelotrichales	Erysipelatoclostridiaceae	Catenibacterium	Human (Cameroon)	TACGTAGGTGGCGAGCGTTATCCGGAATCATTGGGCGTAAAGAGGGAGCAGGCGGCCGCAAGGGTCTGTGGTGAAAGACCGAAGCTAAACTTCGGTAAGC
ASV32953	606	-0.0503316	TRUE	TRUE	Rural	d__Bacteria	Firmicutes	Lachnospirales	Lachnospiraceae	NA	Human (Cameroon)	TACGTAGGGGGCAAGCGTTATCCGGATTTACTGGGTGTAAAGGGAGCGTAGACGGCAGCGCAAGTCTGAAGTGAAAGCCCGGGGCTCAACCCCGGAATGG
ASV3301	624	-0.265522	TRUE	TRUE	Rural	d__Bacteria	Firmicutes	Oscillospirales	Butyricicoccaceae	UCG-008	Human (Cameroon)	TACGTAGGGAGCAAGCGTTATCCGGATTTACTGGGTGTAAAGGGCGAGTAGGCGGATTGGCAAGTTGGGAGTGAAATGTCGGGGCTTAACCCCGGAACTG
ASV33033	484	1.16156	TRUE	FALSE	Urban	d__Bacteria	Firmicutes	Peptostreptococcales-Tissierellales	Peptostreptococcales-Tissierellales	Peptoniphilus	Human (Cameroon)	TACGTAGGGGGCTAGCGTTGTCCGGAATCACTGGGCGTAAAGGGTTCGCAGGCGGAAATGCAAGTCAGATGTAAAAGGCAGTAGCTTAACTACTGTAAGC
ASV33316	431	0.169057	TRUE	FALSE	Urban	d__Bacteria	Actinobacteriota	Coriobacteriales	Atopobiaceae	Olsenella	Human (Cameroon)	TACGTAGGGGGCGAGCGTTATCCGGATTCATTGGGCGTAAAGCGCTCGTAGGCTGCCCGCTAGGTCCGGGGTCAAATCCGGGGGCTCAACCCCCGCACGC
ASV33320	384	-1.04591	TRUE	FALSE	Rural	d__Bacteria	Firmicutes	Lachnospirales	Lachnospiraceae	NA	Human (Cameroon)	TACGTAGGGGGCAAGCGTTATCCGGATTTACTGGGTGTAAAGGGAGCGCAGACGGCACTGCAAGTCTGAAGTGAAAGCCCGGGGCTCAACCCCGGGACTG
ASV3333	650	-0.320969	TRUE	TRUE	Rural	d__Bacteria	Firmicutes	Lachnospirales	Lachnospiraceae	NA	Human (Cameroon)	TACGTAGGGGGCAAGCGTTATCCGGATTTACTGGGTGTAAAGGGAGCGTAGACGGTTAAGCAAGTCAGAAGTGAAAGGCTGGGGCTCAACCCCGGGACTG
ASV34292	659	-1.88296	TRUE	TRUE	Rural	d__Bacteria	Bacteroidota	Bacteroidales	Prevotellaceae	Prevotella	Human (Cameroon)	TACGGAAGGTCCGGGCGTTATCCGGATTTATTGGGTTTAAAGGGAGCGTAGGCCGGAGATTAAGCGTGTTGTGAAATGTAGATGCTCAACATCTGCACTG
ASV34355	688	0.840972	TRUE	TRUE	Urban	d__Bacteria	Bacteroidota	Bacteroidales	Marinifilaceae	Odoribacter	Human (Cameroon)	TACGGAGGATGCGAGCGTTATCCGGATTTATTGGGTTTAAAGGGTGCGTAGGCGGTTTATTAAGTTAGTGGTTAAATATTTGAGCTAAACTCAATTGTGC
ASV34665	649	-1.13906	TRUE	TRUE	Rural	d__Bacteria	Bacteroidota	Bacteroidales	Prevotellaceae	Prevotella	Human (Cameroon)	TACGGAAGGTCCGGGCGTTATCCGGATTTATTGGGTTTAAAGGGAGCGTAGGCCGTCTGTTAAGCGTGTTGTGAAATGTCGGGGCTCAACCTGGGCATTG
ASV35185	688	1.02702	TRUE	TRUE	Urban	d__Bacteria	Firmicutes	Peptostreptococcales-Tissierellales	Peptostreptococcales-Tissierellales	Fenollaria	Human (Cameroon)	TACGTAAGGGGCGAGCGTTGTCCGGAATTATTGGGCGTAAAGAGTGCGTAGGCGGCAAATTAAGTCAGATGTGAAAACTAAGGGCTCAACCCATAGATTG
ASV35238	463	-0.103566	TRUE	FALSE	Rural	d__Bacteria	Firmicutes	Lachnospirales	Lachnospiraceae	Tyzzerella	Human (Cameroon)	TACGTATGGTGCAAGCGTTATCCGGATTTACTGGGTGTAAAGGGAGCGTAGACGGTTGTGTAAGTCTGATGTGAAAGCCCGGGGCTCAACCCCGGGACTG
ASV35346	459	0.148001	TRUE	FALSE	Urban	d__Bacteria	Firmicutes	Lachnospirales	Lachnospiraceae	[Ruminococcus]_torques_group	Human (Cameroon)	TACGTATGGTGCAAGCGTTATCCGGATTTACTGGGTGTAAAGGGAGCGTAGACGGATGGGCAAGTCTGATGTGAAAACCCGGGGCTCAACCCCGGGACTG
ASV35510	418	0.0423658	TRUE	FALSE	Urban	d__Bacteria	Firmicutes	Lachnospirales	Lachnospiraceae	Agathobacter	Human (Cameroon)	TACGTATGGAGCAAGCGTTATCCGGATTTACTGGGTGTAAAGGGAGCGTAGGCGGTCCTGCAAGTCTGATGTGAAAGGCCGGGGCTCAACCCCGGGACTG
ASV35596	420	-0.245533	TRUE	FALSE	Rural	d__Bacteria	Desulfobacterota	Desulfovibrionales	Desulfovibrionaceae	uncultured	Human (Cameroon)	TACGGAGGGTGCGAGCGTTAATCGGAATTACTGGGCGTAAAGCGCACGTAGGCTGTATGTCAAGTCAAGGGTGAAATCCCACGGCTCAACCGTGGAACTG
ASV35598	384	0.154991	TRUE	FALSE	Urban	d__Bacteria	Firmicutes	Oscillospirales	Ruminococcaceae	Subdoligranulum	Human (Cameroon)	AACGTAGGGTGCAAGCGTTGTCCGGAATTACTGGGTGTAAAGGGAGCGCAGGCGGGCATGCAAGTTGGAAGTGAAAACTATGGGCTCAACCCATAGCCTG
ASV36123	395	0.986002	TRUE	FALSE	Urban	d__Bacteria	Firmicutes	Peptostreptococcales-Tissierellales	Peptostreptococcales-Tissierellales	Anaerococcus	Human (Cameroon)	TACGTATGGACCGAGCGTTGTCCGGAATCATTGGGCGTAAAGGGTACGTAGGCGGCCTAGTAAGTTAGAAGTGAAATAATATAGCTCAACTATATAAAGC
ASV36287	488	-0.118095	TRUE	FALSE	Rural	d__Bacteria	Firmicutes	Erysipelotrichales	Erysipelotrichaceae	Solobacterium	Human (Cameroon)	TACGTAGGTAGCGAGCGTTATCCGGAATTATTGGGCGTAAAGGGTGCGTAGGCGGCCTGTTAAGTTTATGGTGAAAGCGTGGGGCTCAACCCCATAAAGC
ASV36737	593	-0.61308	TRUE	TRUE	Rural	d__Bacteria	Firmicutes	Oscillospirales	Ruminococcaceae	Ruminococcus	Human (Cameroon)	TACGTAGGGAGCGAGCGTTGTCCGGAATGACTGGGTGTAAAGGGAGCGTAGGCGGGATGGCAAGTCAGATGTGAAACCTGAGGGCTCAACCTTCAGACTG
ASV36928	634	-0.228445	TRUE	TRUE	Rural	d__Bacteria	Firmicutes	Oscillospirales	Butyricicoccaceae	Butyricicoccus	Human (Cameroon)	TACGTAGGGAGCAAGCGTTATCCGGATTTACTGGGTGTAAAGGGCGCGCAGGCGGGCCGGTAAGTTGGAAGTGAAATCTATGGGCTTAACCCATAAACTG
ASV37344	468	0.736755	TRUE	FALSE	Urban	d__Bacteria	Firmicutes	Lachnospirales	Lachnospiraceae	NA	Human (Cameroon)	TACGTAGGGGGCAAGCGTTATCCGGAATTACTGGGTGTAAAGGGAGCGTAGGCGGCATGGTAAGCCAGATGTGAAAGCCCGAAGCTTAACTTCGAGGATT
ASV37390	659	-0.00840891	TRUE	TRUE	Rural	d__Bacteria	Actinobacteriota	Coriobacteriales	Eggerthellaceae	uncultured	Human (Cameroon)	TACGTAGGGAGCGAGCGTTATCCGGATTCATTGGGCGTAAAGCGCGCGTAGGCGGCCCGTCAAGCGGGGTTTCAAATCCAGGGGCTCAACCTCTGGCCGG
ASV3749	405	0.695898	TRUE	FALSE	Urban	d__Bacteria	Bacteroidota	Bacteroidales	Rikenellaceae	Alistipes	Human (Cameroon)	TACGGAGGATTCAAGCGTTATCCGGATTTATTGGGTTTAAAGGGTGCGTAGGCGGTTTGATAAGTTAGAGGTGAAATTTCGGGGCTCAACCCTGAACGTG
ASV37521	477	-0.086904	TRUE	FALSE	Rural	d__Bacteria	Bacteroidota	Bacteroidales	Tannerellaceae	Parabacteroides	Human (Cameroon)	TACGGAGGATGCGAGCGTTATCCGGATTTATTGGGTTTAAAGGGTGCGTAGGTTGTTTTTTAAGTCAGCGGTGAAAGTTTGTGGCTTAACCATAAAATTG
ASV38382	380	0.548628	TRUE	FALSE	Urban	d__Bacteria	Firmicutes	Christensenellales	Christensenellaceae	Christensenellaceae_R-7_group	Human (Cameroon)	TACGTAGGGGGCGAGCGTTGTCCGGAATTACTGGGCGTAAAGGGTGCGTAGGCGGTTTGGTAAGTTGGATGTGAAATACCCGGGCTTAACTTGGGGGCTG
ASV38696	679	-1.11843	TRUE	TRUE	Rural	d__Bacteria	Bacteroidota	Bacteroidales	Prevotellaceae	uncultured	Human (Cameroon)	TACGGAAGGTCCGGGCGTTATCCGGATTTATTGGGTTTAAAGGGAGCGTAGGCCGTCTTTTAAGCGTGTTGTGAAATACTGTCGCTCAACGACAGAGGTG
ASV3876	470	1.28028	TRUE	FALSE	Urban	d__Bacteria	Firmicutes	Peptostreptococcales-Tissierellales	Peptostreptococcales-Tissierellales	Ezakiella	Human (Cameroon)	TACGTATGGAGCGAGCGTTGTCCGGAATTATTGGGCGTAAAGGGTGCGCAGGCGGCTTTACAAGTTGGATGTGAAATATTGTGGCTCAACCACAAACGTG
ASV40179	493	-0.118731	TRUE	FALSE	Rural	d__Bacteria	Firmicutes	Erysipelotrichales	Erysipelotrichaceae	Holdemanella	Human (Cameroon)	TACGTAGGTGGCGAGCGTTATCCGGAATGATTGGGCGTAAAGGGTGCGTAGGTGGCAGAACAAGTCTGGAGTAAAAGGTATGGGCTCAACCCGTACTGGC
ASV42563	551	-0.985254	TRUE	TRUE	Rural	d__Bacteria	Proteobacteria	Burkholderiales	Neisseriaceae	Neisseria	Human (Cameroon)	TACGTAGGGTGCGAGCGTTAATCGGAATTACTGGGCGTAAAGCGGGCGCAGACGGTTACTTAAGCAGGATGTGAAATCCCCGGGCTCAACCTGGGAACTG
ASV42658	387	1.1212	TRUE	FALSE	Urban	d__Bacteria	Bacteroidota	Bacteroidales	Prevotellaceae	Prevotella	Human (Cameroon)	TACGGAAGGTCCGGGCGTTATCCGGATTTATTGGGTTTAAAGGGAGCGTAGGCTGTCTATTAAGCGTGTTGTGAAATTTACCGGCTCAACCGGTGGCTTG
ASV4560	532	0.119503	TRUE	TRUE	Urban	d__Bacteria	Firmicutes	Lachnospirales	Lachnospiraceae	Roseburia	Human (Cameroon)	TACGTAGGGGGCAAGCGTTATCCGGATTTACTGGGTGTAAAGGGAGCGCAGGCGGCATGATAAGTCTGATGTGAAAACCCAAGGCTCAACCATGGGACTG
ASV45733	582	-0.970743	TRUE	TRUE	Rural	d__Bacteria	Firmicutes	Lachnospirales	Lachnospiraceae	NA	Human (Cameroon)	TACGTAGGGGGCAAGCGTTATCCGGATTTACTGGGTGTAAAGGGAGCGTAGACGGTCAAGCAAGTCAGAAGTGAAAGGCTGGGGCTCAACCCCGGGACTG
ASV45982	624	-0.61799	TRUE	TRUE	Rural	d__Bacteria	Bacteroidota	Bacteroidales	Bacteroidaceae	Bacteroides	Human (Cameroon)	TACGGAGGATGCGAGCGTTATCCGGATTTATTGGGTTTAAAGGGAGCGCAGACGGGACTTTAAGTCAGCTGTGAAATTTTCCGGCTCAACCGGGAAACTG
ASV46003	497	1.13171	TRUE	FALSE	Urban	d__Bacteria	Campilobacterota	Campylobacterales	Campylobacteraceae	Campylobacter	Human (Cameroon)	TACGGAGGGTGCAAGCGTTACTCGGAATCACTGGGCGTAAAGGGTGCGTAGGTGGATTATCAAGTCTCTTGTGAAATCTAATAGCTTAACTATTAAATTG
ASV46403	647	1.14409	TRUE	TRUE	Urban	d__Bacteria	Bacteroidota	Bacteroidales	Prevotellaceae	Prevotella	Human (Cameroon)	TACGGAAGGTCCGGGCGTTATCCGGATTTATTGGGTTTAAAGGGAGCGTAGGCCGCCAGGTAAGCGTGTTGTGAAATGTACCGGCTCAACCGGTGAATTG
ASV46941	597	0.107183	TRUE	TRUE	Urban	d__Bacteria	Firmicutes	Lachnospirales	Lachnospiraceae	Lachnoclostridium	Human (Cameroon)	TACGTAGGGGGCAAGCGTTATCCGGATTTACTGGGTGTAAAGGGAGCGTAGACGGTAAAGCAAGTCTGAAGTGAAAGCCCGGGGCTCAACCCCGGGACTG
ASV47065	448	-0.729103	TRUE	FALSE	Rural	d__Bacteria	Firmicutes	Clostridiales	Clostridiaceae	Clostridium_sensu_stricto_1	Human (Cameroon)	TACGTAGGTGGCGAGCGTTGTCCGGATTTACTGGGCGTAAAGGGAGCGTAGGCGGACTTTTAAGTGAGATGTGAAATACCCGGGCTCAACTTGGGTGCTG
ASV5076	561	-0.898386	TRUE	TRUE	Rural	d__Bacteria	Firmicutes	Lachnospirales	Lachnospiraceae	Coprococcus	Human (Cameroon)	TACGTATGGTGCAAGCGTTATCCGGATTTACTGGGTGTAAAGGGTGCGTAGGTGGCAAGGCAAGTCTGAAGTGAAAATCCGGGGCTCAACCCCGGAACTG
ASV5548	538	-0.606265	TRUE	TRUE	Rural	d__Bacteria	Firmicutes	Lachnospirales	Lachnospiraceae	Blautia	Human (Cameroon)	TACGTAGGGGGCGAGCGTTATCCGGATTTACTGGGTGTAAAGGGAGCGTAGACGGCGTATCAAGTCTGATGTGAAAGGCAGGGGCTTAACCCCTGGACTG
ASV565	569	-0.585983	TRUE	TRUE	Rural	d__Bacteria	Firmicutes	Erysipelotrichales	Erysipelotrichaceae	Holdemanella	Human (Cameroon)	TACGTAGGTGGCGAGCGTTATCCGGAATGATTGGGCGTAAAGGGTGCGTAGGTGGCAGATCAAGTCTGGAGTAAAAGGTATGGGCTCAACCCGTACTGGC
ASV7183	665	-0.980404	TRUE	TRUE	Rural	d__Bacteria	Proteobacteria	Burkholderiales	NA	NA	Human (Cameroon)	TACGTAGGGTGCAAGCGTTAATCGGAATTACTGGGCGTAAAGCGTGCGCAGGCGGTTGGGTAAGACAGATGTGAAATCCCCGGGCTTAACCTGGGAACTG
ASV7276	362	-0.153952	TRUE	FALSE	Rural	d__Bacteria	Firmicutes	Oscillospirales	Oscillospiraceae	Flavonifractor	Human (Cameroon)	TACGTAGGTGGCAAGCGTTATCCGGATTTACTGGGTGTAAAGGGCGTGTAGGCGGGATTGCAAGTCAGATGTGAAAACTGGGGGCTCAACCTCCAGCCTG
ASV7369	582	0.342148	TRUE	TRUE	Urban	d__Bacteria	Firmicutes	Lachnospirales	Lachnospiraceae	NA	Human (Cameroon)	TACGTAGGGGGCAAGCGTTATCCGGATTTACTGGGTGTAAAGGGAGCGTAGACGGCGATGCAAGTCTGAAGTGAAAGCCCCGGGCTCAACCTGGGTACTG
ASV7940	478	0.162821	TRUE	FALSE	Urban	d__Bacteria	Firmicutes	Lachnospirales	Lachnospiraceae	[Ruminococcus]_gnavus_group	Human (Cameroon)	TACGTAGGGGGCAAGCGTTATCCGGATTTACTGGGTGTAAAGGGAGCGTAGACGGCATGGCAAGCCAGATGTGAAAGCCCGGGGCTCAACCCCGGGACTG
ASV8097	380	0.297365	TRUE	FALSE	Urban	d__Bacteria	Firmicutes	Erysipelotrichales	Erysipelatoclostridiaceae	UCG-004	Human (Cameroon)	TACGTAGGTGGCAAGCGTTATCCGGAATTATTGGGCGTAAAGAGTGAGCAGGCGGTTATTTAAGTCTGAAGTCAAAGGCTATGGCTCAACCATAGTTCGC
ASV8358	559	0.406147	TRUE	TRUE	Urban	d__Bacteria	Firmicutes	Monoglobales	Monoglobaceae	Monoglobus	Human (Cameroon)	TACGTAGGTGACAAGCGTTGTCCGGATTTACTGGGTGTAAAGGGCGCGTAGGCGGACTGTCAAGTCAGTCGTGAAATACCGGGGCTTAACCCCGGGGCTG
ASV8841	530	-0.58984	TRUE	TRUE	Rural	d__Bacteria	Bacteroidota	Bacteroidales	Prevotellaceae	Alloprevotella	Human (Cameroon)	TACGGAAGGTCCAGGCGTTATCCGGATTTATTGGGTTTAAAGGGAGCGCAGGCGGCGGCGTAAGTCAGTTGTGAAATCGTGCGGCTTAACCGTGCAATTG
ASV8842	393	-0.42744	TRUE	FALSE	Rural	d__Bacteria	Firmicutes	Lachnospirales	Lachnospiraceae	[Eubacterium]_ventriosum_group	Human (Cameroon)	TACGTATGGGGCAAGCGTTATCCGGATTTACTGGGTGTAAAGGGAGCGTAGGCGGCATGGCAAGTCAGAAGTGAAAGCCTGGGGCTCAACCCCGGAATTG
ASV9632	434	0.421091	TRUE	FALSE	Urban	d__Bacteria	Bacteroidota	Bacteroidales	Bacteroidaceae	Bacteroides	Human (Cameroon)	TACGGAGGATCCGAGCGTTATCCGGATTTATTGGGTTTAAAGGGAGCGTAGGCGGACGCTTAAGTCAGTTGTGAAAGTTTGCGGCTCAACCGTAAAATTG
ASV17577	325	0.0762987	TRUE	FALSE	Urban	d__Bacteria	Firmicutes	Oscillospirales	Oscillospiraceae	Colidextribacter	cameroon_semi-urban	TACGTAGGGAGCAAGCGTTATCCGGATTTACTGGGTGTAAAGGGCGTGTAGGCGGGACTGCAAGTCAGATGTGAAAACTATGGGCTTAACCCATAGCCTG
ASV18628	574	-1.75116	TRUE	TRUE	Semi-urban	d__Bacteria	Proteobacteria	Aeromonadales	Succinivibrionaceae	Succinivibrio	cameroon_semi-urban	TACGGAGGGTGCAAGCGTTAATCGGAATAACTGGGCGTAAAGGGCATGCAGGCGGTTCATCAAGTAGGATGTGAAATCCCCGGGCTCAACCTGGGAACAG
ASV24538	350	-0.226536	TRUE	FALSE	Semi-urban	d__Bacteria	Firmicutes	Lachnospirales	Lachnospiraceae	Agathobacter	cameroon_semi-urban	TACGTATGGAGCAAGCGTTATCCGGATTTACTGGGTGTAAAGGGAGCGTAGGCGGTCTTATAAGTCTGATGTGAAAGGCCGGGGCTCAACCCCGGGACTG
ASV32068	461	-0.818251	TRUE	TRUE	Semi-urban	d__Bacteria	Firmicutes	Oscillospirales	Ruminococcaceae	Faecalibacterium	cameroon_semi-urban	AACGTAGGTCACAAGCGTTGTCCGGAATTACTGGGTGTAAAGGGAGCGCAGGCGGGAAAGCAAGTTGGAAGTGAAATCCATGGGCTCAACCCATGAACTG
ASV32186	454	1.3722	TRUE	TRUE	Urban	d__Bacteria	Bacteroidota	Bacteroidales	Bacteroidaceae	Bacteroides	cameroon_semi-urban	TACGGAGGATCCGAGCGTTATCCGGATTTATTGGGTTTAAAGGGAGCGTAGATGGATGTTTAAGTCAGTTGTGAAAGTTTGCGGCTCAACCGTAAAATTG
ASV3301	497	-0.166865	TRUE	TRUE	Semi-urban	d__Bacteria	Firmicutes	Oscillospirales	Butyricicoccaceae	UCG-008	cameroon_semi-urban	TACGTAGGGAGCAAGCGTTATCCGGATTTACTGGGTGTAAAGGGCGAGTAGGCGGATTGGCAAGTTGGGAGTGAAATGTCGGGGCTTAACCCCGGAACTG
ASV34355	319	0.705319	TRUE	FALSE	Urban	d__Bacteria	Bacteroidota	Bacteroidales	Marinifilaceae	Odoribacter	cameroon_semi-urban	TACGGAGGATGCGAGCGTTATCCGGATTTATTGGGTTTAAAGGGTGCGTAGGCGGTTTATTAAGTTAGTGGTTAAATATTTGAGCTAAACTCAATTGTGC
ASV4945	313	0.726152	TRUE	FALSE	Urban	d__Bacteria	Firmicutes	Lachnospirales	Lachnospiraceae	Lachnospiraceae_ND3007_group	cameroon_semi-urban	TACGTATGGTGCAAGCGTTATCCGGATTTACTGGGTGTAAAGGGAGCGTAGGTGGCAAGGCAAGCCAGAAGTGAAAACCCGGGGCTCAACCGCGGGATTG
ASV6298	384	-0.105658	TRUE	FALSE	Semi-urban	d__Bacteria	Firmicutes	Clostridia_UCG-014	Clostridia_UCG-014	Clostridia_UCG-014	cameroon_semi-urban	TACGTAGGGAGCAAGCGTTATCCGGATTTATTGGGTGTAAAGGGTGCGTAGACGGGAGATTAAGTTAGTTGTGAAAGCCCTCGGCTTAACTGAGGAATTG
ASV7940	86	1.06178	TRUE	FALSE	Urban	d__Bacteria	Firmicutes	Lachnospirales	Lachnospiraceae	[Ruminococcus]_gnavus_group	Coyote	TACGTAGGGGGCAAGCGTTATCCGGATTTACTGGGTGTAAAGGGAGCGTAGACGGCATGGCAAGCCAGATGTGAAAGCCCGGGGCTCAACCCCGGGACTG
ASV32024	107	-0.782866	TRUE	TRUE	Rural	d__Bacteria	Firmicutes	Peptostreptococcales-Tissierellales	Peptostreptococcaceae	Paeniclostridium	Coyote	TACGTAGGGGGCTAGCGTTATCCGGAATTACTGGGCGTAAAGGGTGCGTAGGCGGTCTTTCAAGCCAGAAGTGAAAGGCTACGGCTCAACCGTAGTAAGC
ASV12654	94	-1.57225	TRUE	FALSE	Rural	d__Bacteria	Firmicutes	Clostridiales	Clostridiaceae	Clostridium_sensu_stricto_1	Coyote	TACGTAGGTGGCGAGCGTTATCCGGATTTACTGGGCGTAAAGGGAGCGTAGGCGGATGATTAAGTGGGATGTGAAATACCCGGGCTCAACTTGGGTGCTG
ASV13765	128	-1.08365	TRUE	TRUE	Rural	d__Bacteria	Fusobacteriota	Fusobacteriales	Fusobacteriaceae	Fusobacterium	Coyote	TACGTATGTCGCAAGCGTTATCCGGATTTATTGGGCGTAAAGCGCGTCTAGGCGGTTTGGTAAGTCTGATGTGGAAATGCGGGGCTCAACTCCGTATTGC
ASV10547	176	0.325462	TRUE	FALSE	Urban	d__Bacteria	Actinobacteriota	Micrococcales	Micrococcaceae	Rothia	Sparrow	TACGTAGGGCGCGAGCGTTGTCCGGAATTATTGGGCGTAAAGAGCTTGTAGGCGGTTTGTCGCGTCTGCTGTGAAAGGCCGGAGCTTAACTCCGTGTATT
ASV13041	189	-0.908129	TRUE	TRUE	Rural	d__Bacteria	Proteobacteria	Pseudomonadales	Moraxellaceae	Acinetobacter	Sparrow	TACAGAGGGTGCGAGCGTTAATCGGATTTACTGGGCGTAAAGCGTGCGTAGGCGGCTTATTAAGTCGGATGTGAAATCCCCGAGCTTAACTTGGGAATTG
ASV13337	146	0.303625	TRUE	FALSE	Urban	d__Bacteria	Proteobacteria	Cardiobacteriales	Wohlfahrtiimonadaceae	Ignatzschineria	Sparrow	TACGGAGGGTGCAAGCGTTAATCGGAATTACTGGGCGTAAAGGGCGCGTAGGTGGTATCTTAAGTTGGGTGTGAAAGCCCCGGGCTCAACCTGGGAATTG
ASV1351	209	-0.330025	TRUE	TRUE	Rural	d__Bacteria	Firmicutes	Clostridiales	Clostridiaceae	Candidatus_Arthromitus	Sparrow	TACGTAGGTGGCAAGCGTTGTTCGGAATAACTGGGCGTAAAGGATGCGTAGGCGGTTAAACAAGTTATATGTTAAATATATAGGCTTAACCTGTAGAGAG
ASV19869	171	-1.23539	TRUE	FALSE	Rural	d__Bacteria	Firmicutes	Mycoplasmatales	Mycoplasmataceae	Ureaplasma	Sparrow	TACATAGGATGCAAGCGTTATCCGGATTTACTGGGCGTAAAACGAGCGCGGGCGGATTAGCAAGTTTGGTATGAAAGGCTTTTGCTTAACAAAAGTTTGT
ASV20478	138	-2.01304	TRUE	FALSE	Rural	d__Bacteria	Proteobacteria	Diplorickettsiales	Diplorickettsiaceae	Rickettsiella	Sparrow	TACAGAGGGTGCAAGCGTTAATCAGAATGACTGGGCGTAAAGGGCGTGTAGGTGGTTGACTAGGTTTGATGTGAAATCCCCGGGCTTAACCTGGGAATTG
ASV21973	201	-0.224885	TRUE	TRUE	Rural	d__Bacteria	Cyanobacteria	NA	NA	NA	Sparrow	TACAGAGGATGCTAGCGTTATTCGGAATGAATGGGCGTAAAGAGTCTGTAGGTAGCTTAAAAAGTCTTTTGAGAAATATTTAGGCTTAACCTAAAAAGTT
ASV24363	241	1.10133	TRUE	TRUE	Urban	d__Bacteria	Proteobacteria	Pseudomonadales	Pseudomonadaceae	Pseudomonas	Sparrow	TACAGAGGGTGCAAGCGTTAATCGGAATTACTGGGCGTAAAGCGCGCGTAGGTGGTTTGTTAAGTTGGATGTGAAATCCCCGGGCTCAACCTGGGAACTG
ASV2889	144	0.162869	TRUE	FALSE	Urban	d__Eukaryota	Basidiomycota	Tremellales	NA	NA	Sparrow	TTCCAGCTCCAGTAGCGTATATTAAAGTTGTTGCAGTTAAAACGCTCGTAGTCGAACTTCGGGCTTGGCGGGATGGTCCGCCTTACGGTGTGTACTATTC
ASV35894	146	0.0882369	TRUE	FALSE	Urban	d__Bacteria	Proteobacteria	Oceanospirillales	Halomonadaceae	Halomonas	Sparrow	TACGGAGGGTGCGAGCGTTAATCGGAATTACTGGGCGTAAAGCGCGCGTAGGCGGCGTGATAAGCCGGTTGTGAAAGCCCCGGGCTCAACCTGGGAACGG
ASV42817	155	-0.11742	TRUE	FALSE	Rural	d__Eukaryota	Basidiomycota	Tremellales	Rhynchogastremataceae	Papiliotrema	Sparrow	TTCCAGCTCCAGTAGCGTATATTAAAGTTGTTGCAGTTAAAAAGCTCGTAGTCGAACTTCGGGCCTGGCGGGACGGTCCGCCTTACGGTGTGTACTGTCC
ASV47065	213	-1.4637	TRUE	TRUE	Rural	d__Bacteria	Firmicutes	Clostridiales	Clostridiaceae	Clostridium_sensu_stricto_1	Sparrow	TACGTAGGTGGCGAGCGTTGTCCGGATTTACTGGGCGTAAAGGGAGCGTAGGCGGACTTTTAAGTGAGATGTGAAATACCCGGGCTCAACTTGGGTGCTG
ASV5684	191	-0.838412	TRUE	TRUE	Rural	d__Bacteria	Firmicutes	Lactobacillales	NA	NA	Sparrow	TACGTAGGTGGCAAGCGTTGTCCGGATTTATTGGGCGTAAAGCGAGCGCAGGCGGTCTTTTAAGTCTGATGTGAAAGCCCACGGCTTAACCGTGGAGGGT
ASV6333	231	-1.69529	TRUE	TRUE	Rural	d__Bacteria	NA	NA	NA	NA	Sparrow	GACAGAAAGGGCGACCCATTGGAGTTTTAAATTGGTGTAAAGGATACGTAGCCGGCCGTAAAAATGGCTAGAGTCAAATAGAAGTAATTACAATACCTAG
ASV12654	528	-0.264345	TRUE	TRUE	Semi-urban	d__Bacteria	Firmicutes	Clostridiales	Clostridiaceae	Clostridium_sensu_stricto_1	Human (Tibet)	TACGTAGGTGGCGAGCGTTATCCGGATTTACTGGGCGTAAAGGGAGCGTAGGCGGATGATTAAGTGGGATGTGAAATACCCGGGCTCAACTTGGGTGCTG
ASV24932	420	-2.07152	TRUE	FALSE	Semi-urban	d__Bacteria	Firmicutes	Oscillospirales	[Eubacterium]_coprostanoligenes_group	[Eubacterium]_coprostanoligenes_group	Human (Tibet)	TACGTAGGTGGCAAGCGTTATCCGGAATTACTGGGTGTAAAGGGAGCGCAGGCGGGATAGCAAGTCAGCTGTGAAAACTATGGGCTCAACCCATAAACTG
ASV32937	660	-3.13922	TRUE	TRUE	Semi-urban	d__Bacteria	Firmicutes	Erysipelotrichales	Erysipelatoclostridiaceae	Catenibacterium	Human (Tibet)	TACGTAGGTGGCGAGCGTTATCCGGAATCATTGGGCGTAAAGAGGGAGCAGGCGGCCGCAAGGGTCTGTGGTGAAAGACCGAAGCTAAACTTCGGTAAGC
ASV34292	631	-4.01135	TRUE	TRUE	Semi-urban	d__Bacteria	Bacteroidota	Bacteroidales	Prevotellaceae	Prevotella	Human (Tibet)	TACGGAAGGTCCGGGCGTTATCCGGATTTATTGGGTTTAAAGGGAGCGTAGGCCGGAGATTAAGCGTGTTGTGAAATGTAGATGCTCAACATCTGCACTG
ASV39114	644	2.31076	TRUE	TRUE	Urban	d__Bacteria	Firmicutes	Erysipelotrichales	Erysipelatoclostridiaceae	Erysipelotrichaceae_UCG-003	Human (Tibet)	TACGTAGGTGGCGAGCGTTATCCGGAATTATTGGGCGTAAAGAGGGAGCAGGCGGCACTAAGGGTCTGTGGTGAAAGATCGAAGCTTAACTTCGGTAAGC
ASV634	442	-0.223648	TRUE	FALSE	Semi-urban	d__Bacteria	Firmicutes	Erysipelotrichales	Erysipelatoclostridiaceae	Catenibacterium	Human (Tibet)	ACGTAGGTGGCGAGCGTTATCCGGAATCATTGGGCGTAAAGAGGGAGCAGGCGGCCGCAAGGGTCTGTGGTGAAAGACCGAAGCTAAACTTCGGTAAGCC
ASV10201	390	-0.856706	TRUE	FALSE	Rural	d__Bacteria	Firmicutes	Oscillospirales	Oscillospiraceae	UCG-005	Human (Tibet)	TACGTAGGTGGCAAGCGTTGTCCGGATTTACTGGGTGTAAAGGGCGTGTAGGCGGAGATTCAAGTCAGGAGTGAAATCTATGGGCTTAACCCATAAACTG
ASV13321	328	0.553277	TRUE	FALSE	Urban	d__Bacteria	Firmicutes	Peptostreptococcales-Tissierellales	Anaerovoracaceae	Family_XIII_UCG-001	Human (Tibet)	TACGTAGGGGGCAAGCGTTGTCCGGAATTATTGGGCGTAAAGAGTACGTAGGCGGTCTGGTAAGCGCAAGGTGAAAGGCATAGGCTCAACCAATGTCAGC
ASV15162	327	1.5937	TRUE	FALSE	Urban	d__Bacteria	Firmicutes	Lachnospirales	Lachnospiraceae	Anaerostipes	Human (Tibet)	TACGTAGGGGGCAAGCGTTATCCGGAATTACTGGGTGTAAAGGGTGCGTAGGTGGTATGGCAAGTCAGAAGTGAAAACCCAGGGCTTAACTCTGGGACTG
ASV16362	507	-0.349779	TRUE	TRUE	Rural	d__Bacteria	Firmicutes	Oscillospirales	Ruminococcaceae	NA	Human (Tibet)	AACGTAGGGTGCTAGCGTTGTCCGGAATTACTGGGTGTAAAGGGAGCGCAGGTGGCAGTGCAAGTTGGATGTAAAATCTACGGGCTCAACCCGTATAAGC
ASV17781	326	0.582361	TRUE	FALSE	Urban	d__Bacteria	Bacteroidota	Bacteroidales	Rikenellaceae	Alistipes	Human (Tibet)	TACGGAGGATCCGAGCGTTATCCGGATTTATTGGGTTTAAAGGGTGCGTAGGCTGTTTTTTAAGTTAGAGGTGAAAGCTCGACGCTCAACGTCGAAATTG
ASV17900	336	-0.83969	TRUE	FALSE	Rural	d__Bacteria	Firmicutes	Oscillospirales	Oscillospiraceae	UCG-005	Human (Tibet)	TACGTAGGTGGCAAGCGTTGTCCGGATTTACTGGGTGTAAAGGGCGTGTAGGCGGAGAAGCAAGTCAGAAGTGAAATCCATGGGCTTAACCCATGAACTG
ASV18472	475	1.60592	TRUE	TRUE	Urban	d__Bacteria	Proteobacteria	Enterobacterales	Enterobacteriaceae	NA	Human (Tibet)	TACGGAGGGTGCAAGCGTTAATCGGAATTACTGGGCGTAAAGCGCACGCAGGCGGTTTGTTAAGTCAGATGTGAAATCCCCGGGCTCAACCTGGGAACTG
ASV2303	499	-3.48155	TRUE	TRUE	Rural	d__Bacteria	Firmicutes	Oscillospirales	Oscillospiraceae	UCG-002	Human (Tibet)	TACGTAGGTGGCAAGCGTTGTCCGGATTTACTGGGTGTAAAGGGCGTGTAGCCGGGAGGGCAAGTCAGATGTGAAATCCACGGGCTCAACTCGTGAACTG
ASV23938	439	1.18177	TRUE	FALSE	Urban	d__Bacteria	Bacteroidota	Bacteroidales	Rikenellaceae	Alistipes	Human (Tibet)	TACGGAGGATTCAAGCGTTATCCGGATTTATTGGGTTTAAAGGGTGCGTAGGCGGTTTGATAAGTTAGAGGTGAAATCCCGGGGCTTAACTCCGGAACTG
ASV23963	379	1.40993	TRUE	FALSE	Urban	d__Bacteria	Firmicutes	Lachnospirales	Lachnospiraceae	[Eubacterium]_hallii_group	Human (Tibet)	TACGTATGGAGCAAGCGTTATCCGGATTTACTGGGTGTAAAGGGTGCGTAGGTGGCAGTGCAAGTCAGATGTGAAAGGCCGGGGCTCAACCCCGGAGCTG
ASV24348	396	1.59042	TRUE	FALSE	Urban	d__Bacteria	Actinobacteriota	Coriobacteriales	Coriobacteriaceae	Collinsella	Human (Tibet)	TACGTAGGGGGCGAGCGTTATCCGGATTCATTGGGCGTAAAGCGCGCGTAGGCGGCCCGGCAGGCCGGGGGTCGAAGCGGGGGGCTCAACCCCCCGAAGC
ASV24932	636	-4.3842	TRUE	TRUE	Rural	d__Bacteria	Firmicutes	Oscillospirales	[Eubacterium]_coprostanoligenes_group	[Eubacterium]_coprostanoligenes_group	Human (Tibet)	TACGTAGGTGGCAAGCGTTATCCGGAATTACTGGGTGTAAAGGGAGCGCAGGCGGGATAGCAAGTCAGCTGTGAAAACTATGGGCTCAACCCATAAACTG
ASV25553	326	-1.31762	TRUE	FALSE	Rural	d__Bacteria	Firmicutes	Lachnospirales	Lachnospiraceae	Anaerostipes	Human (Tibet)	TACGTAGGGGGCAAGCGTTATCCGGAATTACTGGGTGTAAAGGGTGCGTAGGTGGCCAGGCAAGTCAGAAGTGAAAGCCCGGGGCTTAACTCCGGGACTG
ASV25579	326	-0.662216	TRUE	FALSE	Rural	d__Bacteria	Bacteroidota	Bacteroidales	uncultured	uncultured	Human (Tibet)	TACGGAAGGTCCAGGCGTTATCCGGATTTATTGGGTTTAAAGGGAGCGTAGGCGGGGAGTCAAGTCAGTTGTGAAAAGCCACGGCCCAACCGTGGTCGTG
ASV26948	591	-3.79849	TRUE	TRUE	Rural	d__Bacteria	Bacteroidota	Bacteroidales	Prevotellaceae	Prevotella	Human (Tibet)	TACGGAAGGTCCGGGCGTTATCCGGATTTATTGGGTTTAAAGGGAGCGTAGGCCGGAGATTAAGCGTGTTGTGAAATGTAGAGGCTCAACCTCTGCACTG
ASV26987	447	0.438739	TRUE	FALSE	Urban	d__Bacteria	Firmicutes	Oscillospirales	Ruminococcaceae	Negativibacillus	Human (Tibet)	TACGTAGGTGGCAAGCGTTGTCCGGAATTACTGGGTGTAAAGGGAGCGTAGGCGGGGAGACAAGTTGAATGTTTAAACTATCGGCTTAACTGATAGTCGC
ASV31601	326	1.58373	TRUE	FALSE	Urban	d__Bacteria	Firmicutes	Lachnospirales	Lachnospiraceae	Lachnospira	Human (Tibet)	TACGTATGGAGCAAGCGTTATCCGGATTTACTGGGTGTAAAGGGAGTGTAGGTGGCCAGGCAAGTCAGAAGTGAAAGCCCGGGGCTCAACCCCGGGACTG
ASV32012	368	-0.201987	TRUE	FALSE	Rural	d__Bacteria	Firmicutes	Oscillospirales	[Eubacterium]_coprostanoligenes_group	[Eubacterium]_coprostanoligenes_group	Human (Tibet)	TACGTAGGTGGCAAGCGTTGTCCGGATTTACTGGGTGTAAAGGGAGCGCAGGCGGGACAGCAAGTTGGATGTGAAATACCGGAGCTTAACTCCGGAGCTG
ASV32919	498	-0.61867	TRUE	TRUE	Rural	d__Bacteria	Firmicutes	Christensenellales	Christensenellaceae	Christensenellaceae_R-7_group	Human (Tibet)	TACGTAGGGGGCGAGCGTTGTCCGGAATTACTGGGCGTAAAGGGAGCGTAGGCGGTCTGATAAGTTGGATGTGAAATACCCGGGCTTAACTTGGGGGGTG
ASV32937	614	-2.95415	TRUE	TRUE	Rural	d__Bacteria	Firmicutes	Erysipelotrichales	Erysipelatoclostridiaceae	Catenibacterium	Human (Tibet)	TACGTAGGTGGCGAGCGTTATCCGGAATCATTGGGCGTAAAGAGGGAGCAGGCGGCCGCAAGGGTCTGTGGTGAAAGACCGAAGCTAAACTTCGGTAAGC
ASV33316	426	0.620933	TRUE	FALSE	Urban	d__Bacteria	Actinobacteriota	Coriobacteriales	Atopobiaceae	Olsenella	Human (Tibet)	TACGTAGGGGGCGAGCGTTATCCGGATTCATTGGGCGTAAAGCGCTCGTAGGCTGCCCGCTAGGTCCGGGGTCAAATCCGGGGGCTCAACCCCCGCACGC
ASV34292	324	-2.72448	TRUE	FALSE	Rural	d__Bacteria	Bacteroidota	Bacteroidales	Prevotellaceae	Prevotella	Human (Tibet)	TACGGAAGGTCCGGGCGTTATCCGGATTTATTGGGTTTAAAGGGAGCGTAGGCCGGAGATTAAGCGTGTTGTGAAATGTAGATGCTCAACATCTGCACTG
ASV34354	522	-2.6044	TRUE	TRUE	Rural	d__Bacteria	Bacteroidota	Bacteroidales	Prevotellaceae	Prevotella	Human (Tibet)	TACGGAAGGTCCGGGCGTTATCCGGATTTATTGGGTTTAAAGGGAGCGTAGGCCGGAGATTAAGCGTGTTGTGAAATGTAGATGCTCAACATCTGAACTG
ASV34374	380	0.270861	TRUE	FALSE	Urban	d__Bacteria	Firmicutes	Peptostreptococcales-Tissierellales	Anaerovoracaceae	Mogibacterium	Human (Tibet)	TACGTAGGGGGCAAGCGTTATCCGGAATTATTGGGCGTAAAGAGTGCGTAGGTGGTTATCTAAGCGTAAGGTTTAAGCGTGCAGCTCAACTGCATCTCGC
ASV3468	561	-1.165	TRUE	TRUE	Rural	d__Bacteria	Firmicutes	Oscillospirales	Ruminococcaceae	uncultured	Human (Tibet)	TACGTAGGTGGCAAGCGTTGTCCGGAATTACTGGGTGTAAAGGGAGCGTAGGCGGGCAGGCAAGTCAGGCGTGAAATATATCGGCTCAACCGGTATCTGC
ASV35552	463	-0.607386	TRUE	TRUE	Rural	d__Bacteria	Firmicutes	Oscillospirales	Oscillospiraceae	UCG-005	Human (Tibet)	TACGTAGGTTGCAAGCGTTGTCCGGATTTACTGGGTGTAAAGGGCGTGTAGGCGGAGATGCAAGTTGGGAGTGAAATCCATGGGCTCAACCCATGAACTG
ASV36271	396	-0.529044	TRUE	FALSE	Rural	d__Bacteria	Firmicutes	Christensenellales	Christensenellaceae	Christensenellaceae_R-7_group	Human (Tibet)	TACGTAGGGGGCAAGCGTTGTCCGGAATGATTGGGCGTAAAGGGCGCGTAGGCGGCCAACTAAGTCTGGAGTGAAAGTCCTGCTTTTAAGGTGGGAATTG
ASV37429	323	-1.41622	TRUE	FALSE	Rural	d__Bacteria	Firmicutes	RF39	RF39	RF39	Human (Tibet)	TACGTAGGGGGCGAGCGTTATCCGGATTTATTGGGCGTAAAGCGTGTGTAGGCGGTTTATTAAGTTTAAGATTAAAGTCCGGGGCTCAACTCCGGTAAGT
ASV38476	325	-1.91184	TRUE	FALSE	Rural	d__Bacteria	Firmicutes	Oscillospirales	[Eubacterium]_coprostanoligenes_group	[Eubacterium]_coprostanoligenes_group	Human (Tibet)	TACGTAGGTGGCAAGCGTTGTCCGGAATTACTGGGTGTAAAGGGAGCGCAGGCGGGAAATCAAGTTGGATGTGAAATGTCGGGGCTTAACCCCGGAACTG
ASV38696	532	-1.95613	TRUE	TRUE	Rural	d__Bacteria	Bacteroidota	Bacteroidales	Prevotellaceae	uncultured	Human (Tibet)	TACGGAAGGTCCGGGCGTTATCCGGATTTATTGGGTTTAAAGGGAGCGTAGGCCGTCTTTTAAGCGTGTTGTGAAATACTGTCGCTCAACGACAGAGGTG
ASV39114	635	2.64221	TRUE	TRUE	Urban	d__Bacteria	Firmicutes	Erysipelotrichales	Erysipelatoclostridiaceae	Erysipelotrichaceae_UCG-003	Human (Tibet)	TACGTAGGTGGCGAGCGTTATCCGGAATTATTGGGCGTAAAGAGGGAGCAGGCGGCACTAAGGGTCTGTGGTGAAAGATCGAAGCTTAACTTCGGTAAGC
ASV42387	483	-0.883736	TRUE	TRUE	Rural	d__Bacteria	Firmicutes	Clostridia_UCG-014	Clostridia_UCG-014	Clostridia_UCG-014	Human (Tibet)	TACGTAGGGAGCAAGCGTTATCCGGATTTATTGGGTGTAAAGGGTGCGTAGACGGGACAACAAGTTAGTTGTGAAATCCCTCGGCTTAACTGAGGAACTG
ASV43471	325	0.435726	TRUE	FALSE	Urban	d__Bacteria	Firmicutes	Christensenellales	Christensenellaceae	Christensenellaceae_R-7_group	Human (Tibet)	TACGTAGGGGGCGAGCGTTGTCCGGAATTATTGGGCGTAAAGGGCGCGTAGACGGCTGAGTAAGTTACTGGTGAAAGCCCAGCTTTTAAGGCTGGAATTG
ASV7276	527	-0.245053	TRUE	TRUE	Rural	d__Bacteria	Firmicutes	Oscillospirales	Oscillospiraceae	Flavonifractor	Human (Tibet)	TACGTAGGTGGCAAGCGTTATCCGGATTTACTGGGTGTAAAGGGCGTGTAGGCGGGATTGCAAGTCAGATGTGAAAACTGGGGGCTCAACCTCCAGCCTG
ASV8358	459	0.316133	TRUE	TRUE	Urban	d__Bacteria	Firmicutes	Monoglobales	Monoglobaceae	Monoglobus	Human (Tibet)	TACGTAGGTGACAAGCGTTGTCCGGATTTACTGGGTGTAAAGGGCGCGTAGGCGGACTGTCAAGTCAGTCGTGAAATACCGGGGCTTAACCCCGGGGCTG
ASV8842	469	0.813459	TRUE	TRUE	Urban	d__Bacteria	Firmicutes	Lachnospirales	Lachnospiraceae	[Eubacterium]_ventriosum_group	Human (Tibet)	TACGTATGGGGCAAGCGTTATCCGGATTTACTGGGTGTAAAGGGAGCGTAGGCGGCATGGCAAGTCAGAAGTGAAAGCCTGGGGCTCAACCCCGGAATTG
ASV8893	444	-0.286955	TRUE	FALSE	Rural	d__Bacteria	Firmicutes	Oscillospirales	Ruminococcaceae	Candidatus_Soleaferrea	Human (Tibet)	TACGTAGGTGGCAAGCGTTGTCCGGAATTACTGGGTGTAAAGGGAGAGTAGGCGGGATTGCAAGTCCGTTGTTAAATCTATCGGCTTAACCGGTAGCTGC
ASV9089	448	0.499361	TRUE	FALSE	Urban	d__Bacteria	Firmicutes	Lachnospirales	Lachnospiraceae	Lachnospiraceae_NK4B4_group	Human (Tibet)	TACGTAGGGGGCAAGCGTTATCCGGATTTACTGGGTGTAAAGGGAGCGCAGGCGGCAGGGCAAGTCAGATGTGAAATACTGGGGCTCAACCCCGGGACTG
ASV9632	641	3.68074	TRUE	TRUE	Urban	d__Bacteria	Bacteroidota	Bacteroidales	Bacteroidaceae	Bacteroides	Human (Tibet)	TACGGAGGATCCGAGCGTTATCCGGATTTATTGGGTTTAAAGGGAGCGTAGGCGGACGCTTAAGTCAGTTGTGAAAGTTTGCGGCTCAACCGTAAAATTG
ASV10012	822	-0.103054	TRUE	TRUE	Malawi (Rural)	d__Bacteria	Firmicutes	Lachnospirales	Lachnospiraceae	Oribacterium	Human (USA/Malawi/Venezuela)	TACGTAGGGGGCAAGCGTTATCCGGATTTACTGGGTGTAAAGGGAGCGTAGACGGCAATGCAAGTCTGAAGTGAAAGGACGGGGCTTAACCCTGTGACTG
ASV10178	703	-0.2503	TRUE	TRUE	USA (Urban)	d__Bacteria	Firmicutes	Desulfitobacteriales	Desulfitobacteriaceae	Desulfitobacterium	Human (USA/Malawi/Venezuela)	TACGTAGGGGGCAAGCGTTGTCCGGAATCATTGGGCGTAAAGGGCGCGTAGGCGGATACTTAAGTCTGGTGTGAAAACCTAGGGCTCAACCCTGGGACTG
ASV10178	528	-0.137859	TRUE	FALSE	Malawi (Rural)	d__Bacteria	Firmicutes	Desulfitobacteriales	Desulfitobacteriaceae	Desulfitobacterium	Human (USA/Malawi/Venezuela)	TACGTAGGGGGCAAGCGTTGTCCGGAATCATTGGGCGTAAAGGGCGCGTAGGCGGATACTTAAGTCTGGTGTGAAAACCTAGGGCTCAACCCTGGGACTG
ASV10179	817	-0.152224	TRUE	TRUE	Malawi (Rural)	d__Bacteria	Firmicutes	Oscillospirales	UCG-010	UCG-010	Human (USA/Malawi/Venezuela)	TACGTAGGTGGCGAGCGTTATCCGGATTTACTGGGTGTAAAGGGTGTGTAGGCGGGACTGCAAGTCAGATGTGAAAACTATGGGCTCAACTCATAGCTTG
ASV10325	715	0.313628	TRUE	TRUE	Venezuela (Rural)	d__Bacteria	Firmicutes	Oscillospirales	[Eubacterium]_coprostanoligenes_group	[Eubacterium]_coprostanoligenes_group	Human (USA/Malawi/Venezuela)	TACGTAGGTGGCAAGCGTTGTCCGGAATTACTGGGTGTAAAGGGAGCGTAGGCGGGATGCCAAGTCAGCTGTGAAAACTATGGGCTTAACCTGTAGACTG
ASV10325	665	0.0134194	TRUE	TRUE	USA (Urban)	d__Bacteria	Firmicutes	Oscillospirales	[Eubacterium]_coprostanoligenes_group	[Eubacterium]_coprostanoligenes_group	Human (USA/Malawi/Venezuela)	TACGTAGGTGGCAAGCGTTGTCCGGAATTACTGGGTGTAAAGGGAGCGTAGGCGGGATGCCAAGTCAGCTGTGAAAACTATGGGCTTAACCTGTAGACTG
ASV10377	796	0.534101	TRUE	TRUE	USA (Urban)	d__Bacteria	Firmicutes	Clostridia_vadinBB60_group	Clostridia_vadinBB60_group	Clostridia_vadinBB60_group	Human (USA/Malawi/Venezuela)	TACGTAGGATGCAAGCGTTATCCGGAATGACTGGGCGTAAAGGGTGCGTAGGCGGTAAATCAAGTTGGCAGCGTAATTCCGGGGCTTAACTCCGGAACTA
ASV10377	761	-0.81036	TRUE	TRUE	USA (Urban)	d__Bacteria	Firmicutes	Clostridia_vadinBB60_group	Clostridia_vadinBB60_group	Clostridia_vadinBB60_group	Human (USA/Malawi/Venezuela)	TACGTAGGATGCAAGCGTTATCCGGAATGACTGGGCGTAAAGGGTGCGTAGGCGGTAAATCAAGTTGGCAGCGTAATTCCGGGGCTTAACTCCGGAACTA
ASV10538	510	-0.0852023	TRUE	FALSE	Malawi (Rural)	d__Bacteria	Firmicutes	Christensenellales	Christensenellaceae	Christensenellaceae_R-7_group	Human (USA/Malawi/Venezuela)	TACGTAGGGGGCGAGCGTTGTCCGGAATTACTGGGCGTAAAGGGCGCGTAGGCGGTTGTGCAAGTCTGTTGTGAAATTCCGGGGCTCAACTCCGGCAGTG
ASV10544	527	-0.211185	TRUE	FALSE	Malawi (Rural)	d__Bacteria	Actinobacteriota	Coriobacteriales	Eggerthellaceae	Enteroscipio	Human (USA/Malawi/Venezuela)	TACGTAGGGGGCGAGCGTTATCCGGATTCATTGGGCGTAAAGCGCGCGTAGGCGGGCCTCTAAGCGGAACCTCTAACCCGAGGGCTCAACCCCCGGCCGG
ASV10547	573	-1.12751	TRUE	FALSE	Malawi (Rural)	d__Bacteria	Actinobacteriota	Micrococcales	Micrococcaceae	Rothia	Human (USA/Malawi/Venezuela)	TACGTAGGGCGCGAGCGTTGTCCGGAATTATTGGGCGTAAAGAGCTTGTAGGCGGTTTGTCGCGTCTGCTGTGAAAGGCCGGAGCTTAACTCCGTGTATT
ASV10589	789	0.83945	TRUE	TRUE	Venezuela (Rural)	d__Bacteria	Actinobacteriota	Coriobacteriales	Eggerthellaceae	NA	Human (USA/Malawi/Venezuela)	CACGTAGGGGGCGAGCGTTATCCGGATTCATTGGGCGTAAAGCGCGCGTAGGCGGCCGCTCAAGCGGGACCTCTAATCCCGGGGCTCAACCCCGGGCCGG
ASV10589	819	-1.0211	TRUE	TRUE	Malawi (Rural)	d__Bacteria	Actinobacteriota	Coriobacteriales	Eggerthellaceae	NA	Human (USA/Malawi/Venezuela)	CACGTAGGGGGCGAGCGTTATCCGGATTCATTGGGCGTAAAGCGCGCGTAGGCGGCCGCTCAAGCGGGACCTCTAATCCCGGGGCTCAACCCCGGGCCGG
ASV10755	530	0.212424	TRUE	FALSE	USA (Urban)	d__Bacteria	Bacteroidota	Bacteroidales	NA	NA	Human (USA/Malawi/Venezuela)	TACGGAGGATGCAAGCGTTATCCGGATTTATTGGGTTTAAAGGGTGCGTAGGCGGAATTCCAAGTCAGCGGTGAAATCTCCATGCTCAACATGGACACTG
ASV10755	478	-0.0740004	TRUE	FALSE	USA (Urban)	d__Bacteria	Bacteroidota	Bacteroidales	NA	NA	Human (USA/Malawi/Venezuela)	TACGGAGGATGCAAGCGTTATCCGGATTTATTGGGTTTAAAGGGTGCGTAGGCGGAATTCCAAGTCAGCGGTGAAATCTCCATGCTCAACATGGACACTG
ASV10873	660	-1.14139	TRUE	TRUE	Malawi (Rural)	d__Bacteria	Firmicutes	Oscillospirales	[Clostridium]_methylpentosum_group	[Clostridium]_methylpentosum_group	Human (USA/Malawi/Venezuela)	TACGTAGGGAGCGAGCGTTGTCCGGAATTACTGGGTGTAAAGGGAGCGTAGGCGGGAGCGCAAGTTAAATGTTTAAACTATCGGCTCAACTGATAGTCGC
ASV10941	565	-0.132814	TRUE	FALSE	USA (Urban)	d__Bacteria	Proteobacteria	Pasteurellales	Pasteurellaceae	NA	Human (USA/Malawi/Venezuela)	TACGGAGGGTGCGAGCGTTAATCGGAATAACTGGGCGTAAAGGGCACGCAGGCGGACTTTTAAGTGAGGTGTGAAAGCCCCGGGCTTAACCTGGGAATTG
ASV10941	683	-0.328577	TRUE	TRUE	Malawi (Rural)	d__Bacteria	Proteobacteria	Pasteurellales	Pasteurellaceae	NA	Human (USA/Malawi/Venezuela)	TACGGAGGGTGCGAGCGTTAATCGGAATAACTGGGCGTAAAGGGCACGCAGGCGGACTTTTAAGTGAGGTGTGAAAGCCCCGGGCTTAACCTGGGAATTG
ASV10987	806	0.532023	TRUE	TRUE	USA (Urban)	d__Bacteria	Firmicutes	Clostridia_vadinBB60_group	Clostridia_vadinBB60_group	Clostridia_vadinBB60_group	Human (USA/Malawi/Venezuela)	TACGTAGGTAGCAAGCGTTGTCCGGAATGACTGGGCGTAAAGGGTGCGTAGGTGGCTTAACAAGTTGGTAGTGAAATTCCGAGGCTTAACTTCGGCGCTA
ASV10987	787	-0.442257	TRUE	TRUE	USA (Urban)	d__Bacteria	Firmicutes	Clostridia_vadinBB60_group	Clostridia_vadinBB60_group	Clostridia_vadinBB60_group	Human (USA/Malawi/Venezuela)	TACGTAGGTAGCAAGCGTTGTCCGGAATGACTGGGCGTAAAGGGTGCGTAGGTGGCTTAACAAGTTGGTAGTGAAATTCCGAGGCTTAACTTCGGCGCTA
ASV11012	784	-0.676711	TRUE	TRUE	USA (Urban)	d__Bacteria	Actinobacteriota	Coriobacteriales	Coriobacteriales_Incertae_Sedis	uncultured	Human (USA/Malawi/Venezuela)	TACGTAGGGAGCAAGCGTTATCCGGATTTATTGGGCGTAAAGCGCGCGTAGGCGGCTTGTTAAGCAAGATCTCAAATCTGGGGGCTCAACCTCCAGCCGG
ASV11064	731	-1.44977	TRUE	TRUE	Malawi (Rural)	d__Bacteria	Firmicutes	Veillonellales-Selenomonadales	Selenomonadaceae	Mitsuokella	Human (USA/Malawi/Venezuela)	TACGTAGGTGGCGAGCGTTGTCCGGAATTATTGGGCGTAAAGGGAGCGCAGGCGGGAGGTCAAGTCTATCTTAAAAGTGCGGGGCTCAACCCCGTGAGGG
ASV11064	743	0.540187	TRUE	TRUE	Venezuela (Rural)	d__Bacteria	Firmicutes	Veillonellales-Selenomonadales	Selenomonadaceae	Mitsuokella	Human (USA/Malawi/Venezuela)	TACGTAGGTGGCGAGCGTTGTCCGGAATTATTGGGCGTAAAGGGAGCGCAGGCGGGAGGTCAAGTCTATCTTAAAAGTGCGGGGCTCAACCCCGTGAGGG
ASV11080	488	0.138953	TRUE	FALSE	Venezuela (Rural)	d__Bacteria	Firmicutes	Oscillospirales	NA	NA	Human (USA/Malawi/Venezuela)	TACGTAGATGGCAAGCGTTGTCCGGAATTACTGGGTGTAAAGGGAGCGTAGGCGGGATAGCAAGTTGGATGTGAAAAACCCAGGCTCAACCTGGGAGGTG
ASV11080	561	-0.520203	TRUE	FALSE	Malawi (Rural)	d__Bacteria	Firmicutes	Oscillospirales	NA	NA	Human (USA/Malawi/Venezuela)	TACGTAGATGGCAAGCGTTGTCCGGAATTACTGGGTGTAAAGGGAGCGTAGGCGGGATAGCAAGTTGGATGTGAAAAACCCAGGCTCAACCTGGGAGGTG
ASV11203	817	-0.84436	TRUE	TRUE	Malawi (Rural)	d__Bacteria	Actinobacteriota	Coriobacteriales	Eggerthellaceae	Gordonibacter	Human (USA/Malawi/Venezuela)	TACGTAGGGGGCGAGCGTTATCCGGATTCATTGGGCGTAAAGCGCGCGTAGGCGGCCCGTCAAGCGGAACCTCTAACCCGAGGGCTCAACCCCCGGTCGG
ASV11203	777	0.649452	TRUE	TRUE	Venezuela (Rural)	d__Bacteria	Actinobacteriota	Coriobacteriales	Eggerthellaceae	Gordonibacter	Human (USA/Malawi/Venezuela)	TACGTAGGGGGCGAGCGTTATCCGGATTCATTGGGCGTAAAGCGCGCGTAGGCGGCCCGTCAAGCGGAACCTCTAACCCGAGGGCTCAACCCCCGGTCGG
ASV11243	852	-1.29811	TRUE	TRUE	Malawi (Rural)	d__Bacteria	Actinobacteriota	Coriobacteriales	Eggerthellaceae	Senegalimassilia	Human (USA/Malawi/Venezuela)	TACGTATGGGGCGAGCGTTATCCGGATTCATTGGGCGTAAAGCGCGCGTAGGCGGAGCGCTAAGCGGGACCTCTAACCCGAGGGCTCAACCCCCGGCCGG
ASV11243	836	1.74708	TRUE	TRUE	Venezuela (Rural)	d__Bacteria	Actinobacteriota	Coriobacteriales	Eggerthellaceae	Senegalimassilia	Human (USA/Malawi/Venezuela)	TACGTATGGGGCGAGCGTTATCCGGATTCATTGGGCGTAAAGCGCGCGTAGGCGGAGCGCTAAGCGGGACCTCTAACCCGAGGGCTCAACCCCCGGCCGG
ASV11247	723	0.666176	TRUE	TRUE	Venezuela (Rural)	d__Bacteria	Firmicutes	Oscillospirales	Ruminococcaceae	Candidatus_Soleaferrea	Human (USA/Malawi/Venezuela)	TACGTAGGTGGCGAGCGTTGTCCGGAATTACTGGGTGTAAAGGGAGCGTAGGCGGGTACGCAAGTTGAATGTGAAAACTAACGGCTCAACCGATAGTTGC
ASV11247	795	-0.968429	TRUE	TRUE	Malawi (Rural)	d__Bacteria	Firmicutes	Oscillospirales	Ruminococcaceae	Candidatus_Soleaferrea	Human (USA/Malawi/Venezuela)	TACGTAGGTGGCGAGCGTTGTCCGGAATTACTGGGTGTAAAGGGAGCGTAGGCGGGTACGCAAGTTGAATGTGAAAACTAACGGCTCAACCGATAGTTGC
ASV11257	769	0.240252	TRUE	TRUE	USA (Urban)	d__Bacteria	Firmicutes	Oscillospirales	UCG-010	UCG-010	Human (USA/Malawi/Venezuela)	TACGTAGGTGGCGAGCGTTATCCGGAATTACTGGGTGTAAAGGGTGTGTAGGCGGGGTGTCAAGTCAGATGTGAAAACTGTGGGCTCAACCCACAAACTG
ASV11257	735	-0.52418	TRUE	TRUE	USA (Urban)	d__Bacteria	Firmicutes	Oscillospirales	UCG-010	UCG-010	Human (USA/Malawi/Venezuela)	TACGTAGGTGGCGAGCGTTATCCGGAATTACTGGGTGTAAAGGGTGTGTAGGCGGGGTGTCAAGTCAGATGTGAAAACTGTGGGCTCAACCCACAAACTG
ASV11314	520	-0.00446939	TRUE	FALSE	Malawi (Rural)	d__Bacteria	Actinobacteriota	Actinomycetales	Actinomycetaceae	Varibaculum	Human (USA/Malawi/Venezuela)	TACGTAGGGCGCGAGCGTTATCCGGAATTATTGGGCGTAAAGGGCTTGTAGGTGGCTGGTTGCGTCTGTCGTGAAAGCTCATGGCTTAACTGTGGGTTTG
ASV11365	503	-0.437826	TRUE	FALSE	Malawi (Rural)	d__Bacteria	Bacteroidota	Bacteroidales	Porphyromonadaceae	Porphyromonas	Human (USA/Malawi/Venezuela)	TACGGAGGATGCGAGCGTTATCCGGAATTATTGGGTTTAAAGGGTGCGTAGGTTGCAAGGGAAGTCAGGGGTGAAAAGCTGTAGCTCAACTATGGTCTTG
ASV11375	486	-0.238323	TRUE	FALSE	Malawi (Rural)	d__Bacteria	Firmicutes	Clostridia_vadinBB60_group	Clostridia_vadinBB60_group	Clostridia_vadinBB60_group	Human (USA/Malawi/Venezuela)	TACGTAGGATGCAAGCGTTATCCGGAATGACTGGGCGTAAAGGGTGCGTAGGTGGTTTGTCAAGTTGGCAGCGTAATTCCGTGGCTCAACCGCGGAACTA
ASV11381	654	1.52135	TRUE	TRUE	Venezuela (Rural)	d__Bacteria	Firmicutes	Oscillospirales	Ruminococcaceae	Ruminococcaceae	Human (USA/Malawi/Venezuela)	TACGTAGGTGGCAAGCGTTGTCCGGAATTACTGGGTGTAAAGGGAGCGTAGGCGGGAATACAAGTTGGATGTCTAATCTACCGGCTTAACCGGTATTCGC
ASV11381	700	-1.44057	TRUE	TRUE	Malawi (Rural)	d__Bacteria	Firmicutes	Oscillospirales	Ruminococcaceae	Ruminococcaceae	Human (USA/Malawi/Venezuela)	TACGTAGGTGGCAAGCGTTGTCCGGAATTACTGGGTGTAAAGGGAGCGTAGGCGGGAATACAAGTTGGATGTCTAATCTACCGGCTTAACCGGTATTCGC
ASV11417	595	-0.157749	TRUE	FALSE	USA (Urban)	d__Bacteria	Firmicutes	Oscillospirales	Ruminococcaceae	Faecalibacterium	Human (USA/Malawi/Venezuela)	AACGTAGGTCCCAAGCGTTGTCCGGAATTACTGGGTGTAAAGGGAGCGCAGGCGGGAAGACAAGTTGGAAGTGAAATCCATGGGCTCAACCCATGAACTG
ASV11596	763	0.129025	TRUE	TRUE	USA (Urban)	d__Bacteria	Firmicutes	RF39	RF39	RF39	Human (USA/Malawi/Venezuela)	TACGTAGGTGGCGAGCGTTATCCGGATTTATTGGGCGTAAAGGGTGCGTAGGCGGTATGTTAAGTATAAAATAAAAGCCCGAAGCTTAACTTCGGTTCGT
ASV11596	750	0.058094	TRUE	TRUE	Venezuela (Rural)	d__Bacteria	Firmicutes	RF39	RF39	RF39	Human (USA/Malawi/Venezuela)	TACGTAGGTGGCGAGCGTTATCCGGATTTATTGGGCGTAAAGGGTGCGTAGGCGGTATGTTAAGTATAAAATAAAAGCCCGAAGCTTAACTTCGGTTCGT
ASV11609	506	0.0865651	TRUE	FALSE	USA (Urban)	d__Bacteria	Firmicutes	Lachnospirales	Lachnospiraceae	NA	Human (USA/Malawi/Venezuela)	TACGTAGGGGGCAAGCGTTATCCGGATTTACTGGGTGTAAAGGGAGCGTAGACGGCATGGCAAGTCTGATGTGAAAACTTGGGGCTCAACCCCAAGACTG
ASV11667	502	-0.63129	TRUE	FALSE	Malawi (Rural)	d__Bacteria	Firmicutes	Christensenellales	Christensenellaceae	Christensenellaceae_R-7_group	Human (USA/Malawi/Venezuela)	TACGTAGGGGGCGAGCGTTGTCCGGAATGACTGGGCGTAAAGGGCGTGTAGGCGGCTTTTTAAGTCTGGAGTGAAAGCCCCATTTTCAAGGTGGGGACTG
ASV11688	695	-0.159549	TRUE	TRUE	Malawi (Rural)	d__Bacteria	Firmicutes	Clostridia_UCG-014	Clostridia_UCG-014	Clostridia_UCG-014	Human (USA/Malawi/Venezuela)	TACGTAGGGAGCAAGCGTTATCCGGATTTATTGGGTGTAAAGGGTGCGTAGACGGGAAGGTAAGTTAGTTGTGAAATCCCTCGGCTCAACTGAGGAACTG
ASV11688	639	0.150912	TRUE	TRUE	Venezuela (Rural)	d__Bacteria	Firmicutes	Clostridia_UCG-014	Clostridia_UCG-014	Clostridia_UCG-014	Human (USA/Malawi/Venezuela)	TACGTAGGGAGCAAGCGTTATCCGGATTTATTGGGTGTAAAGGGTGCGTAGACGGGAAGGTAAGTTAGTTGTGAAATCCCTCGGCTCAACTGAGGAACTG
ASV11801	482	-0.150545	TRUE	FALSE	Malawi (Rural)	d__Bacteria	Firmicutes	Christensenellales	Christensenellaceae	uncultured	Human (USA/Malawi/Venezuela)	TACGTAGGGAGCAAGCGTTGTCCGGAATTACTGGGCGTAAAGGGTGCGTAGGCGGCGCAGTGAGTCAGAAGTGAAATATCGGGGCTTAACCCCGGGGCTG
ASV11910	784	-1.42632	TRUE	TRUE	USA (Urban)	d__Bacteria	Firmicutes	Lachnospirales	Defluviitaleaceae	Defluviitaleaceae_UCG-011	Human (USA/Malawi/Venezuela)	TACGTAGGGGGCAAGCGTTATCCGGAATTACTGGGTGTAAAGGGTGCGTAGGCGGTATGGCAAGTTTGATGTGAAACCCACAGGCTTAACCTGTGGCTTT
ASV11910	803	1.89172	TRUE	TRUE	USA (Urban)	d__Bacteria	Firmicutes	Lachnospirales	Defluviitaleaceae	Defluviitaleaceae_UCG-011	Human (USA/Malawi/Venezuela)	TACGTAGGGGGCAAGCGTTATCCGGAATTACTGGGTGTAAAGGGTGCGTAGGCGGTATGGCAAGTTTGATGTGAAACCCACAGGCTTAACCTGTGGCTTT
ASV11960	505	0.0243676	TRUE	FALSE	USA (Urban)	d__Bacteria	Firmicutes	Oscillospirales	Oscillospiraceae	NA	Human (USA/Malawi/Venezuela)	TACGTAGGTGGCAAGCGTTATCCGGATTTACTGGGTGTAAAGGGCGTGTAGGCGGGAGTGCAAGTCAGATGTGAAAACTATGGGCTCAACCCATAGCCTG
ASV11968	828	-0.88226	TRUE	TRUE	USA (Urban)	d__Bacteria	Actinobacteriota	Coriobacteriales	Eggerthellaceae	NA	Human (USA/Malawi/Venezuela)	TACGTAGGGGGCGAGCGTTATCCGGATTCATTGGGCGTAAAGCGCGCGTAGGCGGCCGCCTAAGCGGAACCTCTAATCCCGGGGCTCAACCTCGGGCCGG
ASV11968	858	1.17607	TRUE	TRUE	USA (Urban)	d__Bacteria	Actinobacteriota	Coriobacteriales	Eggerthellaceae	NA	Human (USA/Malawi/Venezuela)	TACGTAGGGGGCGAGCGTTATCCGGATTCATTGGGCGTAAAGCGCGCGTAGGCGGCCGCCTAAGCGGAACCTCTAATCCCGGGGCTCAACCTCGGGCCGG
ASV12019	691	0.0772037	TRUE	TRUE	USA (Urban)	d__Bacteria	Firmicutes	Oscillospirales	[Clostridium]_methylpentosum_group	[Clostridium]_methylpentosum_group	Human (USA/Malawi/Venezuela)	TACGTAGGTGGCAAGCGTTGTCCGGAATTACTGGGTGTAAAGGGAGCGTAGGCGGGAAAGCAAGTTGAATGTTTAAACTATCGGCTCAACCGATAATCGC
ASV12019	589	-0.0375549	TRUE	FALSE	USA (Urban)	d__Bacteria	Firmicutes	Oscillospirales	[Clostridium]_methylpentosum_group	[Clostridium]_methylpentosum_group	Human (USA/Malawi/Venezuela)	TACGTAGGTGGCAAGCGTTGTCCGGAATTACTGGGTGTAAAGGGAGCGTAGGCGGGAAAGCAAGTTGAATGTTTAAACTATCGGCTCAACCGATAATCGC
ASV12062	499	-0.0667517	TRUE	FALSE	Malawi (Rural)	d__Bacteria	Actinobacteriota	Bifidobacteriales	Bifidobacteriaceae	Bifidobacterium	Human (USA/Malawi/Venezuela)	TACGTAGGGCGCAAGCGTTATCCGGATTTATTGGGCGTAAAGGGCTCGTAGGCGGCTCGTCGCGTCCGGTGTGAAAGTCCATCGCTTAACGGTGGATCTG
ASV12068	802	-2.55887	TRUE	TRUE	USA (Urban)	d__Bacteria	Bacteroidota	Bacteroidales	Rikenellaceae	Alistipes	Human (USA/Malawi/Venezuela)	TACGGAGGATCCAAGCGTTATCCGGATTTATTGGGTTTAAAGGGTGCGTAGGCGGTTTGATAAGTTAGAGGTGAAATACCGGTGCTTAACACCGGAACTG
ASV12068	819	3.00063	TRUE	TRUE	USA (Urban)	d__Bacteria	Bacteroidota	Bacteroidales	Rikenellaceae	Alistipes	Human (USA/Malawi/Venezuela)	TACGGAGGATCCAAGCGTTATCCGGATTTATTGGGTTTAAAGGGTGCGTAGGCGGTTTGATAAGTTAGAGGTGAAATACCGGTGCTTAACACCGGAACTG
ASV12097	490	-0.00671849	TRUE	FALSE	Malawi (Rural)	d__Bacteria	Bacteroidota	Bacteroidales	Marinifilaceae	Butyricimonas	Human (USA/Malawi/Venezuela)	TACGGGGGATGCGAGCGTTATCCGGATTTATTGGGTTTAAAGGGCGCGTAGGCGGGACGGCAAGTCAGCGGTAAAAGACTGCAGCTAAACTGTAGCACGC
ASV12097	735	-0.0476108	TRUE	TRUE	USA (Urban)	d__Bacteria	Bacteroidota	Bacteroidales	Marinifilaceae	Butyricimonas	Human (USA/Malawi/Venezuela)	TACGGGGGATGCGAGCGTTATCCGGATTTATTGGGTTTAAAGGGCGCGTAGGCGGGACGGCAAGTCAGCGGTAAAAGACTGCAGCTAAACTGTAGCACGC
ASV12103	433	0.339951	TRUE	FALSE	Venezuela (Rural)	d__Bacteria	Firmicutes	Veillonellales-Selenomonadales	Veillonellaceae	Veillonella	Human (USA/Malawi/Venezuela)	TACGTAGGTGGCAAGCGTTGTCCGGAATTATTGGGCGTAAAGCGCGCGCAGGCGGATCAGTTAGTCTGTCTTAAAAGTTCGGGGCTTAACCCCGTGATGG
ASV12103	520	-0.504946	TRUE	FALSE	Malawi (Rural)	d__Bacteria	Firmicutes	Veillonellales-Selenomonadales	Veillonellaceae	Veillonella	Human (USA/Malawi/Venezuela)	TACGTAGGTGGCAAGCGTTGTCCGGAATTATTGGGCGTAAAGCGCGCGCAGGCGGATCAGTTAGTCTGTCTTAAAAGTTCGGGGCTTAACCCCGTGATGG
ASV12121	798	-0.866615	TRUE	TRUE	USA (Urban)	d__Bacteria	Firmicutes	Oscillospirales	Ruminococcaceae	Candidatus_Soleaferrea	Human (USA/Malawi/Venezuela)	TACGTAGATGGCGAGCGTTGTCCGGAATTACTGGGTGTAAAGGGAGTGTAGGCGGGATCATAAGTTGCGTGTGAAATGCAGGGGCTCAACCCCTGAACTG
ASV12121	849	-0.155197	TRUE	TRUE	Malawi (Rural)	d__Bacteria	Firmicutes	Oscillospirales	Ruminococcaceae	Candidatus_Soleaferrea	Human (USA/Malawi/Venezuela)	TACGTAGATGGCGAGCGTTGTCCGGAATTACTGGGTGTAAAGGGAGTGTAGGCGGGATCATAAGTTGCGTGTGAAATGCAGGGGCTCAACCCCTGAACTG
ASV12168	844	-0.901748	TRUE	TRUE	Malawi (Rural)	d__Bacteria	Firmicutes	Erysipelotrichales	Erysipelatoclostridiaceae	Erysipelatoclostridium	Human (USA/Malawi/Venezuela)	TACGTAGGTGGCAAGCGTTATCCGGAATTATTGGGCGTAAAGAGGGAGCAGGCGGCAATAGAGGTCTGTGGTAAAAGGCTGAAGCTTAACTTCAGTAAGC
ASV12168	778	-0.396857	TRUE	TRUE	USA (Urban)	d__Bacteria	Firmicutes	Erysipelotrichales	Erysipelatoclostridiaceae	Erysipelatoclostridium	Human (USA/Malawi/Venezuela)	TACGTAGGTGGCAAGCGTTATCCGGAATTATTGGGCGTAAAGAGGGAGCAGGCGGCAATAGAGGTCTGTGGTAAAAGGCTGAAGCTTAACTTCAGTAAGC
ASV12172	562	1.56903	TRUE	FALSE	Venezuela (Rural)	d__Bacteria	Firmicutes	Oscillospirales	Ruminococcaceae	Candidatus_Soleaferrea	Human (USA/Malawi/Venezuela)	TACGTAGGTGGCAAGCGTTGTCCGGAATTACTGGGTGTAAAGGGAGCGTAGGCGGGATTGCAAGTTAAATGTGAAATCTATCGGCTCAACCGGTAGCTGC
ASV12172	637	-1.59989	TRUE	TRUE	Malawi (Rural)	d__Bacteria	Firmicutes	Oscillospirales	Ruminococcaceae	Candidatus_Soleaferrea	Human (USA/Malawi/Venezuela)	TACGTAGGTGGCAAGCGTTGTCCGGAATTACTGGGTGTAAAGGGAGCGTAGGCGGGATTGCAAGTTAAATGTGAAATCTATCGGCTCAACCGGTAGCTGC
ASV12219	477	-0.0547747	TRUE	FALSE	Malawi (Rural)	d__Bacteria	Firmicutes	NA	NA	NA	Human (USA/Malawi/Venezuela)	TACGTAGGTGGCGAGCGTTGTCCGGAATTACTGGGTGTAAAGGGCGCGTAGACGGGTAGATAAGTTAGATGTGAAATACCGGGGCTTAACTCCGGGGCTG
ASV12254	482	-0.136518	TRUE	FALSE	Malawi (Rural)	d__Bacteria	Firmicutes	Oscillospirales	NA	NA	Human (USA/Malawi/Venezuela)	TACGTAGGGAGCGAGCGTTGTCCGGATTTACTGGGTGTAAAGGGTGCGTAGGCGGGTCGGCAAGTCAGATGTGAAATACCGGGGCTTAACTCCGGGGCTG
ASV12259	467	0.519724	TRUE	FALSE	Venezuela (Rural)	d__Bacteria	Actinobacteriota	Actinomycetales	Actinomycetaceae	Actinomyces	Human (USA/Malawi/Venezuela)	TACGTAGGGCGCGAGCGTTGTCCGGAATTATTGGGCGTAAAGGGCTTGTAGGCGGTTGGTCGCGTCTGCCGTGAAATCCTCTGGCTTAACTGGGGGCGGG
ASV12285	538	-0.238618	TRUE	FALSE	Malawi (Rural)	d__Bacteria	Firmicutes	Clostridia_vadinBB60_group	Clostridia_vadinBB60_group	Clostridia_vadinBB60_group	Human (USA/Malawi/Venezuela)	TACGTAGGGAGCAAGCGTTGTCCGGAATGACTGGGCGTAAAGGGTGCGTAGGCGGTTTCGTAAGTTAGAAGTGTAATCCCGGGGCTTAACCCCGGAGCTA
ASV12306	710	-0.137691	TRUE	TRUE	USA (Urban)	d__Bacteria	Desulfobacterota	Desulfovibrionales	Desulfovibrionaceae	Desulfovibrio	Human (USA/Malawi/Venezuela)	TACGGAGGGTGCAAGCGTTAATCGGAATTACTGGGCGTAAAGCGCACGTAGGCTGTTGTGTAAGTCAGGGGTGAAATCCCACGGCTCAACCGTGGAACTG
ASV12312	650	-0.67361	TRUE	TRUE	USA (Urban)	d__Bacteria	Firmicutes	Lachnospirales	Lachnospiraceae	Lachnospira	Human (USA/Malawi/Venezuela)	TACGTATGGAGCAAGCGTTATCCGGATTTACTGGGTGTAAAGGGAGTGTAGGTGGTATCACAAGTCAGAAGTGAAAGCCCGGGGCTCAACCCCGGGACTG
ASV12313	463	0.329031	TRUE	FALSE	Venezuela (Rural)	d__Bacteria	Actinobacteriota	Coriobacteriales	Atopobiaceae	Atopobium	Human (USA/Malawi/Venezuela)	TACGTAGGGGGCAAGCGTTATCCGGATTCATTGGGCGTAAAGCGCTCGTAGGCGGTCTGTTAGGTCGGGAGTTAAATCCGGAGGCTCAACCTCCGTTCGC
ASV12313	578	-0.364758	TRUE	FALSE	Malawi (Rural)	d__Bacteria	Actinobacteriota	Coriobacteriales	Atopobiaceae	Atopobium	Human (USA/Malawi/Venezuela)	TACGTAGGGGGCAAGCGTTATCCGGATTCATTGGGCGTAAAGCGCTCGTAGGCGGTCTGTTAGGTCGGGAGTTAAATCCGGAGGCTCAACCTCCGTTCGC
ASV12386	508	-0.167233	TRUE	FALSE	Malawi (Rural)	d__Bacteria	Firmicutes	Peptococcales	Peptococcaceae	Peptococcus	Human (USA/Malawi/Venezuela)	AACATAGGGGGCAAGCGTTGTCCGGAATCACTGGGCGTAAAGGGCGCGCAGGCGGTCTGTTAAGTCAGATGTGAAAGGTTAGGGCTCAACCCTGAACGTG
ASV12461	537	-0.24723	TRUE	FALSE	Malawi (Rural)	d__Bacteria	Firmicutes	Oscillospirales	Oscillospiraceae	Oscillibacter	Human (USA/Malawi/Venezuela)	TACGTAGGGAGCGAGCGTTGTCCGGATTTACTGGGTGTAAAGGGCGTGCAGCCGGGCTGGTAAGTCAGATGTGAAATCCGTGGGCTTAACCCACGAACTG
ASV12616	703	1.12717	TRUE	TRUE	Venezuela (Rural)	d__Bacteria	Firmicutes	Christensenellales	Christensenellaceae	Christensenellaceae_R-7_group	Human (USA/Malawi/Venezuela)	TACGTAGGGGGCGAGCGTTGTCCGGAATGACTGGGCGTAAAGGGCGTGTAGGCGGCTTTTTAAGTCTGGAGTGAAAGCCCCTTTTTCAAGGAGGGGAGTG
ASV12616	759	-1.14245	TRUE	TRUE	Malawi (Rural)	d__Bacteria	Firmicutes	Christensenellales	Christensenellaceae	Christensenellaceae_R-7_group	Human (USA/Malawi/Venezuela)	TACGTAGGGGGCGAGCGTTGTCCGGAATGACTGGGCGTAAAGGGCGTGTAGGCGGCTTTTTAAGTCTGGAGTGAAAGCCCCTTTTTCAAGGAGGGGAGTG
ASV12627	481	-0.134688	TRUE	FALSE	Malawi (Rural)	d__Bacteria	Firmicutes	uncultured	uncultured	uncultured	Human (USA/Malawi/Venezuela)	TACGTAGGGAGCAAGCGTTGTCCGGAATTACTGGGTGTAAAGGGTGCGTAGGCGGGTATGCAAGTCATATGTGAAATACCGGGGCTCAACTCCGGGGCTG
ASV12649	783	0.655602	TRUE	TRUE	USA (Urban)	d__Bacteria	Firmicutes	Peptostreptococcales-Tissierellales	Anaerovoracaceae	Family_XIII_AD3011_group	Human (USA/Malawi/Venezuela)	TACGTAGGGGGCAAGCGTTATCCGGAATTATTGGGCGTAAAGGGTACGTAGGTGGTTACCCAAGCACGAGGTATAAGGCAATGGCTTAACCATTGTTCGC
ASV12654	527	-0.351733	TRUE	FALSE	Malawi (Rural)	d__Bacteria	Firmicutes	Clostridiales	Clostridiaceae	Clostridium_sensu_stricto_1	Human (USA/Malawi/Venezuela)	TACGTAGGTGGCGAGCGTTATCCGGATTTACTGGGCGTAAAGGGAGCGTAGGCGGATGATTAAGTGGGATGTGAAATACCCGGGCTCAACTTGGGTGCTG
ASV12654	734	0.333677	TRUE	TRUE	Venezuela (Rural)	d__Bacteria	Firmicutes	Clostridiales	Clostridiaceae	Clostridium_sensu_stricto_1	Human (USA/Malawi/Venezuela)	TACGTAGGTGGCGAGCGTTATCCGGATTTACTGGGCGTAAAGGGAGCGTAGGCGGATGATTAAGTGGGATGTGAAATACCCGGGCTCAACTTGGGTGCTG
ASV12712	735	-1.06189	TRUE	TRUE	USA (Urban)	d__Bacteria	Firmicutes	Oscillospirales	NA	NA	Human (USA/Malawi/Venezuela)	TACGTAGGGAGCGAGCGTTGTCCGGAATTACTGGGTGTAAAGGGTGCGTAGGCGGGGGACCAAGTCAGGTGTGAAAACTATCGGCTTAACCGGTAGCCTG
ASV12712	600	0.557336	TRUE	FALSE	USA (Urban)	d__Bacteria	Firmicutes	Oscillospirales	NA	NA	Human (USA/Malawi/Venezuela)	TACGTAGGGAGCGAGCGTTGTCCGGAATTACTGGGTGTAAAGGGTGCGTAGGCGGGGGACCAAGTCAGGTGTGAAAACTATCGGCTTAACCGGTAGCCTG
ASV12743	504	-0.312737	TRUE	FALSE	Malawi (Rural)	d__Bacteria	Firmicutes	Veillonellales-Selenomonadales	Veillonellaceae	Megasphaera	Human (USA/Malawi/Venezuela)	TACGTAGGTGGCAAGCGTTGTCCGGAATTATTGGGCGTAAAGGGCGCGCAGGCGGCATCGCAAGTCGGTCTTAAAAGTGCGGGGCTTAACCCCGTGAGGG
ASV1281	810	-0.457459	TRUE	TRUE	USA (Urban)	d__Bacteria	Firmicutes	Oscillospirales	Oscillospiraceae	Oscillibacter	Human (USA/Malawi/Venezuela)	TACGTAGGTGGCAAGCGTTGTCCGGATTTACTGGGTGTAAAGGGCGTGCAGCCGGGCTGGCAAGTCAGGCGTGAAATCCCAGGGCTCAACCCTGGAACTG
ASV1281	848	0.35661	TRUE	TRUE	USA (Urban)	d__Bacteria	Firmicutes	Oscillospirales	Oscillospiraceae	Oscillibacter	Human (USA/Malawi/Venezuela)	TACGTAGGTGGCAAGCGTTGTCCGGATTTACTGGGTGTAAAGGGCGTGCAGCCGGGCTGGCAAGTCAGGCGTGAAATCCCAGGGCTCAACCCTGGAACTG
ASV12876	856	-1.0855	TRUE	TRUE	Malawi (Rural)	d__Bacteria	Firmicutes	Lachnospirales	Lachnospiraceae	Marvinbryantia	Human (USA/Malawi/Venezuela)	TACGTAGGGGGCAAGCGTTATCCGGATTTACTGGGTGTAAAGGGAGCGTAGACGGCCGTGCAAGTCTGATGTGAAAGGCTGGGGCTCAACCCCGGGACTG
ASV12903	781	-0.997443	TRUE	TRUE	Malawi (Rural)	d__Bacteria	Firmicutes	Clostridia_UCG-014	Clostridia_UCG-014	Clostridia_UCG-014	Human (USA/Malawi/Venezuela)	TACGTAGGGAGCAAGCGTTATCCGGATTTATTGGGTGTAAAGGGTGCGTAGACGGGAAATTAAGTTAGTTGTGAAATCCCTCGGCTTAACTGAGGAACTG
ASV12903	717	0.777365	TRUE	TRUE	Venezuela (Rural)	d__Bacteria	Firmicutes	Clostridia_UCG-014	Clostridia_UCG-014	Clostridia_UCG-014	Human (USA/Malawi/Venezuela)	TACGTAGGGAGCAAGCGTTATCCGGATTTATTGGGTGTAAAGGGTGCGTAGACGGGAAATTAAGTTAGTTGTGAAATCCCTCGGCTTAACTGAGGAACTG
ASV12968	571	-0.290869	TRUE	FALSE	Malawi (Rural)	d__Bacteria	Bacteroidota	Bacteroidales	Porphyromonadaceae	Porphyromonas	Human (USA/Malawi/Venezuela)	TACGGGGGATACGAGCGTTATCCGGAATTATTGGGTTTAAAGGGTGCGTAGGTGGCTATTTAAGTCAGGGGTGAAAAGCATGAGCTCAACTCATGTCTTG
ASV12968	507	0.0450755	TRUE	FALSE	Venezuela (Rural)	d__Bacteria	Bacteroidota	Bacteroidales	Porphyromonadaceae	Porphyromonas	Human (USA/Malawi/Venezuela)	TACGGGGGATACGAGCGTTATCCGGAATTATTGGGTTTAAAGGGTGCGTAGGTGGCTATTTAAGTCAGGGGTGAAAAGCATGAGCTCAACTCATGTCTTG
ASV1299	442	0.312613	TRUE	FALSE	Venezuela (Rural)	d__Bacteria	Actinobacteriota	Actinomycetales	Actinomycetaceae	Actinomyces	Human (USA/Malawi/Venezuela)	TACGTAGGGCGCGAGCGTTGTCCGGAATTATTGGGCGTAAAGGGCTTGTAGGCGGTTGGTCGCGTCTGCCGTGAAATCCTCTGGCTTAACTGGGGGCGTG
ASV1299	672	-0.168215	TRUE	TRUE	Malawi (Rural)	d__Bacteria	Actinobacteriota	Actinomycetales	Actinomycetaceae	Actinomyces	Human (USA/Malawi/Venezuela)	TACGTAGGGCGCGAGCGTTGTCCGGAATTATTGGGCGTAAAGGGCTTGTAGGCGGTTGGTCGCGTCTGCCGTGAAATCCTCTGGCTTAACTGGGGGCGTG
ASV13122	446	-0.593224	TRUE	FALSE	Malawi (Rural)	d__Bacteria	Firmicutes	Veillonellales-Selenomonadales	Veillonellaceae	Veillonella	Human (USA/Malawi/Venezuela)	TACGTAGGTGGCAAGCGTTGTCCGGAATTATTGGGCGTAAAGCGCGCGCAGGCGGATCAGTCAGTCTGTCTTAAAAGTTCGGGGCTTAACCCCGTGATGG
ASV13173	545	-0.522812	TRUE	FALSE	Malawi (Rural)	d__Bacteria	Firmicutes	Oscillospirales	Ruminococcaceae	Candidatus_Soleaferrea	Human (USA/Malawi/Venezuela)	TACGTAGGGAGCGAGCGTTGTCCGGAATTACTGGGTGTAAAGGGAGCGTAGGCGGGTCAGCAAGTCCGTTGTTAAATCTATCGGCTCAACCGGTAGCTGC
ASV13173	477	0.169335	TRUE	FALSE	Venezuela (Rural)	d__Bacteria	Firmicutes	Oscillospirales	Ruminococcaceae	Candidatus_Soleaferrea	Human (USA/Malawi/Venezuela)	TACGTAGGGAGCGAGCGTTGTCCGGAATTACTGGGTGTAAAGGGAGCGTAGGCGGGTCAGCAAGTCCGTTGTTAAATCTATCGGCTCAACCGGTAGCTGC
ASV13203	777	-1.48481	TRUE	TRUE	USA (Urban)	d__Bacteria	Firmicutes	Oscillospirales	Ruminococcaceae	uncultured	Human (USA/Malawi/Venezuela)	TACGTAGGGAGCGAGCGTTGTCCGGATTTACTGGGTGTAAAGGGTGCGTAGGCGGGCCTGCAAGTCAGACGTGAAATACCGGGGCTTAACTCCGGGGCTG
ASV13203	799	1.05636	TRUE	TRUE	USA (Urban)	d__Bacteria	Firmicutes	Oscillospirales	Ruminococcaceae	uncultured	Human (USA/Malawi/Venezuela)	TACGTAGGGAGCGAGCGTTGTCCGGATTTACTGGGTGTAAAGGGTGCGTAGGCGGGCCTGCAAGTCAGACGTGAAATACCGGGGCTTAACTCCGGGGCTG
ASV13273	538	1.53372	TRUE	FALSE	USA (Urban)	d__Bacteria	Bacteroidota	Bacteroidales	Bacteroidaceae	Bacteroides	Human (USA/Malawi/Venezuela)	TACGGAGGATCCGAGCGTTATCCGGATTTATTGGGTTTAAAGGGAGCGTAGATGGGTTGTTAAGTCAGTTGTGAAAGTTTGCGGCTCAACCGTAAAATTG
ASV13304	508	-0.832725	TRUE	FALSE	Malawi (Rural)	d__Bacteria	Verrucomicrobiota	Verrucomicrobiales	Akkermansiaceae	Akkermansia	Human (USA/Malawi/Venezuela)	TACAGAGGTCTCAAGCGTTGTTCGGAATCACTGGGCGTAAAGCGTGCGTAGGCTGTTTCGTAAGTCGTGTGTGAAAGGCGCGGGCTCAACCCGCAGACGG
ASV13321	833	1.3003	TRUE	TRUE	Venezuela (Rural)	d__Bacteria	Firmicutes	Peptostreptococcales-Tissierellales	Anaerovoracaceae	Family_XIII_UCG-001	Human (USA/Malawi/Venezuela)	TACGTAGGGGGCAAGCGTTGTCCGGAATTATTGGGCGTAAAGAGTACGTAGGCGGTCTGGTAAGCGCAAGGTGAAAGGCATAGGCTCAACCAATGTCAGC
ASV13321	863	-1.40167	TRUE	TRUE	Malawi (Rural)	d__Bacteria	Firmicutes	Peptostreptococcales-Tissierellales	Anaerovoracaceae	Family_XIII_UCG-001	Human (USA/Malawi/Venezuela)	TACGTAGGGGGCAAGCGTTGTCCGGAATTATTGGGCGTAAAGAGTACGTAGGCGGTCTGGTAAGCGCAAGGTGAAAGGCATAGGCTCAACCAATGTCAGC
ASV13326	462	0.524712	TRUE	FALSE	Venezuela (Rural)	d__Bacteria	Actinobacteriota	Actinomycetales	Actinomycetaceae	Actinomyces	Human (USA/Malawi/Venezuela)	TACGTAGGGCGCGAGCGTTGTCCGGAATTATTGGGCGTAAAGAGCTCGTAGGCGGCTGGTCGCGTCTGTCGTGAAATCCTCTGGCTTAACTGGGGGCGTG
ASV13350	775	-1.05772	TRUE	TRUE	Malawi (Rural)	d__Bacteria	Bacteroidota	Bacteroidales	Prevotellaceae	Prevotella	Human (USA/Malawi/Venezuela)	TACGGAAGGTCCGGGCGTTATCCGGATTTATTGGGTTTAAAGGGAGCGTAGGCCGTTTGGTAAGCGTGTTGTGAAATGTCGGGGCTCAACCTGGGCATTG
ASV13400	482	-0.44844	TRUE	FALSE	Malawi (Rural)	d__Bacteria	Actinobacteriota	Coriobacteriales	Eggerthellaceae	Gordonibacter	Human (USA/Malawi/Venezuela)	TACGTAGGGGGCGAGCGTTATCCGGATTCATTGGGCGTAAAGCGCGCGTAGGCGGCCCGTCAAGCGGAACCTCTAACCCGAGGGCTCAACCCCCGGCCGG
ASV13508	508	-0.763611	TRUE	FALSE	Malawi (Rural)	d__Bacteria	Firmicutes	Christensenellales	Christensenellaceae	Christensenellaceae_R-7_group	Human (USA/Malawi/Venezuela)	TACGTAGGGGGCGAGCGTTGTCCGGAATTACTGGGCGTAAAGGGTGCGTAGGCGGCCTGAAAAGTCGGATGTGAAAGACCCGTGCTTAACATGGGGGTTG
ASV13599	792	-0.0680524	TRUE	TRUE	USA (Urban)	d__Bacteria	Bacteroidota	Bacteroidales	Rikenellaceae	Rikenellaceae_RC9_gut_group	Human (USA/Malawi/Venezuela)	TACGGAGGGTGCAAGCGTTATCCGGATTTATTGGGTTTAAAGGGTGCGTAGGCTGTCCGACAAGTCAGGGGTGAAAGCCCGGCGCCCAACGCCGGAACCG
ASV13608	800	1.3889	TRUE	TRUE	USA (Urban)	d__Bacteria	Firmicutes	Lachnospirales	Defluviitaleaceae	Defluviitaleaceae_UCG-011	Human (USA/Malawi/Venezuela)	TACGTAGGGGGCAAGCGTTATCCGGAATTACTGGGTGTAAAGGGTGCGTAGGCGGTATGGCAAGTTTGATGTGAAACCCACAGGCTTAACCTGTGGCTTG
ASV13634	860	2.03661	TRUE	TRUE	USA (Urban)	d__Bacteria	Proteobacteria	Burkholderiales	Sutterellaceae	Parasutterella	Human (USA/Malawi/Venezuela)	TACGTAGGGTGCGAGCGTTAATCGGAATTACTGGGCGTAAAGGGTGCGCAGGCGGTTGAGTAAGACAGATGTGAAATCCCCGAGCTTAACTCGGGAATGG
ASV13634	839	-1.97299	TRUE	TRUE	USA (Urban)	d__Bacteria	Proteobacteria	Burkholderiales	Sutterellaceae	Parasutterella	Human (USA/Malawi/Venezuela)	TACGTAGGGTGCGAGCGTTAATCGGAATTACTGGGCGTAAAGGGTGCGCAGGCGGTTGAGTAAGACAGATGTGAAATCCCCGAGCTTAACTCGGGAATGG
ASV13681	788	1.0346	TRUE	TRUE	USA (Urban)	d__Bacteria	Firmicutes	Oscillospirales	Oscillospiraceae	Intestinimonas	Human (USA/Malawi/Venezuela)	TACGTAGGTGGCAAGCGTTATCCGGATTTACTGGGTGTAAAGGGCGTGTAGGCGGGAGGGCAAGTCAGATGTGAAAATTATGGGCTCAACCCATAACCTG
ASV13681	778	-0.470589	TRUE	TRUE	USA (Urban)	d__Bacteria	Firmicutes	Oscillospirales	Oscillospiraceae	Intestinimonas	Human (USA/Malawi/Venezuela)	TACGTAGGTGGCAAGCGTTATCCGGATTTACTGGGTGTAAAGGGCGTGTAGGCGGGAGGGCAAGTCAGATGTGAAAATTATGGGCTCAACCCATAACCTG
ASV13693	474	-0.121404	TRUE	FALSE	Malawi (Rural)	d__Bacteria	Firmicutes	Peptococcales	Peptococcaceae	uncultured	Human (USA/Malawi/Venezuela)	TACGTAGGGGGCGAGCGTTGTCCGGAATCACTGGGCGTAAAGGGCGCGTAGGCGGTATAATAAGTCAGTGGTGAAAACCTGGGGCTCAACCCCGGGCCTG
ASV13709	730	-0.325885	TRUE	TRUE	USA (Urban)	d__Bacteria	Firmicutes	Lachnospirales	Lachnospiraceae	Lachnospiraceae_UCG-001	Human (USA/Malawi/Venezuela)	TACGTATGGTGCAAGCGTTATCCGGATTTACTGGGTGTAAAGGGAGCGCAGGCGGTCTGGCAAGTCTGATGTGAAAATCCGGGGCTCAACTCCGGAACTG
ASV13709	760	0.0206406	TRUE	TRUE	USA (Urban)	d__Bacteria	Firmicutes	Lachnospirales	Lachnospiraceae	Lachnospiraceae_UCG-001	Human (USA/Malawi/Venezuela)	TACGTATGGTGCAAGCGTTATCCGGATTTACTGGGTGTAAAGGGAGCGCAGGCGGTCTGGCAAGTCTGATGTGAAAATCCGGGGCTCAACTCCGGAACTG
ASV13714	446	0.303105	TRUE	FALSE	Venezuela (Rural)	d__Bacteria	Firmicutes	Oscillospirales	uncultured	uncultured	Human (USA/Malawi/Venezuela)	TACGTAGGGAGCAAGCGTTGTCCGGATTTACTGGGTGTAAAGGGTGCGTAGGCGGCCTTTCAAGTCAGATGTGAAAACCCGGGGCTTAACCCCGGGCCTG
ASV13714	545	-0.369537	TRUE	FALSE	Malawi (Rural)	d__Bacteria	Firmicutes	Oscillospirales	uncultured	uncultured	Human (USA/Malawi/Venezuela)	TACGTAGGGAGCAAGCGTTGTCCGGATTTACTGGGTGTAAAGGGTGCGTAGGCGGCCTTTCAAGTCAGATGTGAAAACCCGGGGCTTAACCCCGGGCCTG
ASV13818	742	0.882062	TRUE	TRUE	USA (Urban)	d__Bacteria	Firmicutes	Christensenellales	Christensenellaceae	Christensenellaceae_R-7_group	Human (USA/Malawi/Venezuela)	TACGTAGGGGGCGAGCGTTGTCCGGAATGACTGGGCGTAAAGGGCGTGTAGGCGGCCGATTAAGTGTGGAGTGAAAGTCCTGCTTTTAAGGTGGGAATTG
ASV13818	748	-1.17848	TRUE	TRUE	USA (Urban)	d__Bacteria	Firmicutes	Christensenellales	Christensenellaceae	Christensenellaceae_R-7_group	Human (USA/Malawi/Venezuela)	TACGTAGGGGGCGAGCGTTGTCCGGAATGACTGGGCGTAAAGGGCGTGTAGGCGGCCGATTAAGTGTGGAGTGAAAGTCCTGCTTTTAAGGTGGGAATTG
ASV13833	516	0.659707	TRUE	FALSE	USA (Urban)	d__Bacteria	Bacteroidota	Bacteroidales	Bacteroidaceae	Bacteroides	Human (USA/Malawi/Venezuela)	TACGGAGGATCCGAGCGTTATCCGGATTTATTGGGTTTAAAGGGAGCGTAGGCGGGTGCTTAAGTCAGTTGTGAAAGTTTGCGGCTCAACCGTAAAATTG
ASV13851	523	-0.697333	TRUE	FALSE	Malawi (Rural)	d__Bacteria	Bacteroidota	Bacteroidales	Prevotellaceae	Prevotella	Human (USA/Malawi/Venezuela)	TACGGAAGGTCCGGGCGTTATCCGGATTTATTGGGTTTAAAGGGAGTGTAGGCGGCCTGTTAAGCGTGTTGTGAAATGTAGATGCTCAACATCTGAACTG
ASV13943	825	-0.779842	TRUE	TRUE	Malawi (Rural)	d__Bacteria	Bacteroidota	Bacteroidales	Muribaculaceae	Muribaculaceae	Human (USA/Malawi/Venezuela)	TACGGAGGATGCGAGCGTTATCCGGATTTATTGGGTTTAAAGGGTGCGCAGGCGGCGCGCCAAGTCAGCGGTCAAAGTTCCGGGCTCAACCCGGTGTCGC
ASV13943	835	1.37166	TRUE	TRUE	Venezuela (Rural)	d__Bacteria	Bacteroidota	Bacteroidales	Muribaculaceae	Muribaculaceae	Human (USA/Malawi/Venezuela)	TACGGAGGATGCGAGCGTTATCCGGATTTATTGGGTTTAAAGGGTGCGCAGGCGGCGCGCCAAGTCAGCGGTCAAAGTTCCGGGCTCAACCCGGTGTCGC
ASV13971	483	-0.133617	TRUE	FALSE	Malawi (Rural)	d__Bacteria	Bacteroidota	Bacteroidales	Marinifilaceae	Odoribacter	Human (USA/Malawi/Venezuela)	TACGGAGGATGCGAGCGTTATCCGGATTTATTGGGTTTAAAGGGTGCGTAGGCGGCTTTATAAGTTAGTGGTAAAATTTCGGAGCTTCACTCCGGTCCGC
ASV14094	875	-4.1494	TRUE	TRUE	Malawi (Rural)	d__Bacteria	Firmicutes	Veillonellales-Selenomonadales	Veillonellaceae	Dialister	Human (USA/Malawi/Venezuela)	TACGTAGGTGGCAAGCGTTGTCCGGAATTATTGGGCGTAAAGCGCGCGCAGGCGGCTTCTTAAGTCCATCTTAAAAGTGCGGGGCTTAACCCCGTGATGG
ASV14094	851	3.7988	TRUE	TRUE	Venezuela (Rural)	d__Bacteria	Firmicutes	Veillonellales-Selenomonadales	Veillonellaceae	Dialister	Human (USA/Malawi/Venezuela)	TACGTAGGTGGCAAGCGTTGTCCGGAATTATTGGGCGTAAAGCGCGCGCAGGCGGCTTCTTAAGTCCATCTTAAAAGTGCGGGGCTTAACCCCGTGATGG
ASV14238	805	1.92065	TRUE	TRUE	USA (Urban)	d__Bacteria	Firmicutes	Lachnospirales	Lachnospiraceae	NA	Human (USA/Malawi/Venezuela)	TACGTAGGGGGCAAGCGTTATCCGGAATTACTGGGTGTAAAGGGAGAGTAGGCGGCATGGTAAGTAAGATGTGAAAGCCTGGGGCTTAACCGCAGGATTG
ASV14268	775	-0.130369	TRUE	TRUE	Malawi (Rural)	d__Bacteria	Campilobacterota	Campylobacterales	Campylobacteraceae	Campylobacter	Human (USA/Malawi/Venezuela)	TACGGAGGGTGCAAGCGTTACTCGGAATCACTGGGCGTAAAGGACGCGTAGGCGGATTATCAAGTCTTTTGTGAAATCTAATGGCTTAACCATTAAACTG
ASV14372	582	0.512397	TRUE	FALSE	USA (Urban)	d__Bacteria	Bacteroidota	Bacteroidales	Bacteroidaceae	Bacteroides	Human (USA/Malawi/Venezuela)	TACGGAGGATCCGAGCGTTATCCGGATTTATTGGGTTTAAAGGGAGCGTAGGTGGACATGTAAGTCAGTTGTGAAAGTTTGCGGCTCAACCGTAAAATTG
ASV14372	462	-0.347961	TRUE	FALSE	USA (Urban)	d__Bacteria	Bacteroidota	Bacteroidales	Bacteroidaceae	Bacteroides	Human (USA/Malawi/Venezuela)	TACGGAGGATCCGAGCGTTATCCGGATTTATTGGGTTTAAAGGGAGCGTAGGTGGACATGTAAGTCAGTTGTGAAAGTTTGCGGCTCAACCGTAAAATTG
ASV14453	823	-1.28662	TRUE	TRUE	USA (Urban)	d__Bacteria	Firmicutes	Veillonellales-Selenomonadales	Veillonellaceae	Dialister	Human (USA/Malawi/Venezuela)	TACGTAGGTGGCAAGCGTTGTCCGGAATTATTGGGCGTAAAGCGCGCGCAGGCGGCTTCCCAAGTCCCTCTTAAAAGTGCGGGGCTTAACCCCGTGATGG
ASV14453	848	1.27638	TRUE	TRUE	USA (Urban)	d__Bacteria	Firmicutes	Veillonellales-Selenomonadales	Veillonellaceae	Dialister	Human (USA/Malawi/Venezuela)	TACGTAGGTGGCAAGCGTTGTCCGGAATTATTGGGCGTAAAGCGCGCGCAGGCGGCTTCCCAAGTCCCTCTTAAAAGTGCGGGGCTTAACCCCGTGATGG
ASV14605	487	0.123616	TRUE	FALSE	Venezuela (Rural)	d__Bacteria	Firmicutes	Christensenellales	Christensenellaceae	Christensenellaceae_R-7_group	Human (USA/Malawi/Venezuela)	TACGTAGGGGGCGAGCGTTGTCCGGAATTACTGGGCGTAAAGGGCGCGTAGGCGGCAGATTAAGTCTTGTGTGAAAACCCCATTTTCAAGGTGGGAGGTG
ASV14606	478	0.0496843	TRUE	FALSE	USA (Urban)	d__Bacteria	Verrucomicrobiota	Verrucomicrobiales	Akkermansiaceae	Akkermansia	Human (USA/Malawi/Venezuela)	TACAGAGGTCTCAAGCGTTGTTCGGAATCACTGGGCGTAAAGCGTGCGTAGGCGGTTTCGTAAGTCGTGTGTGAAAGGCGGGGGCTCAACCCCCGGACTG
ASV14631	850	-0.85735	TRUE	TRUE	Malawi (Rural)	d__Bacteria	Firmicutes	Lachnospirales	Lachnospiraceae	Lachnoclostridium	Human (USA/Malawi/Venezuela)	TACGTAGGGGGCAAGCGTTATCCGGATTTACTGGGTGTAAAGGGAGCGTAGACGGTAAAGCAAGTCTGAAGTGAAAGCCCGGGGCTCAACCGCGGGACTG
ASV14692	705	-0.476876	TRUE	TRUE	USA (Urban)	d__Bacteria	Firmicutes	Oscillospirales	[Eubacterium]_coprostanoligenes_group	[Eubacterium]_coprostanoligenes_group	Human (USA/Malawi/Venezuela)	TACGTAGGTGGCAAGCGTTGTCCGGAATTACTGGGTGTAAAGGGAGCGCAGGCGGGTGATCAAGTCAGCTGTGAAAACTACGGGCTTAACCCGTAGACTG
ASV14692	733	0.753549	TRUE	TRUE	USA (Urban)	d__Bacteria	Firmicutes	Oscillospirales	[Eubacterium]_coprostanoligenes_group	[Eubacterium]_coprostanoligenes_group	Human (USA/Malawi/Venezuela)	TACGTAGGTGGCAAGCGTTGTCCGGAATTACTGGGTGTAAAGGGAGCGCAGGCGGGTGATCAAGTCAGCTGTGAAAACTACGGGCTTAACCCGTAGACTG
ASV14768	690	-0.0889811	TRUE	TRUE	USA (Urban)	d__Bacteria	Firmicutes	Oscillospirales	Ruminococcaceae	[Eubacterium]_siraeum_group	Human (USA/Malawi/Venezuela)	TACGTAGGTGGCGAGCGTTGTCCGGAATTACTGGGTGTAAAGGGAGTGTAGGCGGGAAGGCAAGTCAGAAGTGAAAATTATGGGCTTAACCCATAACCTG
ASV14768	735	0.173858	TRUE	TRUE	USA (Urban)	d__Bacteria	Firmicutes	Oscillospirales	Ruminococcaceae	[Eubacterium]_siraeum_group	Human (USA/Malawi/Venezuela)	TACGTAGGTGGCGAGCGTTGTCCGGAATTACTGGGTGTAAAGGGAGTGTAGGCGGGAAGGCAAGTCAGAAGTGAAAATTATGGGCTTAACCCATAACCTG
ASV14883	686	1.6276	TRUE	TRUE	USA (Urban)	d__Bacteria	Firmicutes	Oscillospirales	Oscillospiraceae	UCG-005	Human (USA/Malawi/Venezuela)	TACGTAGGTGGCAAGCGTTGTCCGGATTTACTGGGTGTAAAGGGCGTGTAGGCGGAGATGCAAGTCAGATGTGAAATCCTCGGGCTTAACCCGGGAACTG
ASV14883	547	-1.04289	TRUE	FALSE	USA (Urban)	d__Bacteria	Firmicutes	Oscillospirales	Oscillospiraceae	UCG-005	Human (USA/Malawi/Venezuela)	TACGTAGGTGGCAAGCGTTGTCCGGATTTACTGGGTGTAAAGGGCGTGTAGGCGGAGATGCAAGTCAGATGTGAAATCCTCGGGCTTAACCCGGGAACTG
ASV14906	722	-1.26313	TRUE	TRUE	Malawi (Rural)	d__Bacteria	Firmicutes	Oscillospirales	Ruminococcaceae	Faecalibacterium	Human (USA/Malawi/Venezuela)	AACGTAGGTCACAAGCGTTGTCCGGAATTACTGGGTGTAAAGGGAGCGCAGGCGGGAAGACAAGTTGGAAGTGAAATCCATGGGCTCAACCCATGAACTG
ASV14906	524	1.04763	TRUE	FALSE	Venezuela (Rural)	d__Bacteria	Firmicutes	Oscillospirales	Ruminococcaceae	Faecalibacterium	Human (USA/Malawi/Venezuela)	AACGTAGGTCACAAGCGTTGTCCGGAATTACTGGGTGTAAAGGGAGCGCAGGCGGGAAGACAAGTTGGAAGTGAAATCCATGGGCTCAACCCATGAACTG
ASV14919	783	-0.310941	TRUE	TRUE	USA (Urban)	d__Bacteria	Actinobacteriota	Coriobacteriales	Eggerthellaceae	Enterorhabdus	Human (USA/Malawi/Venezuela)	TACGTAGGGGGCGAGCGTTATCCGGAATGATTGGGCGTAAAGCGCGCGCAGGCGGCCGCTCAAGCGGGACCTCTAACCCCGGGGCTCAACCCCGGGCCGG
ASV14919	815	0.0685763	TRUE	TRUE	USA (Urban)	d__Bacteria	Actinobacteriota	Coriobacteriales	Eggerthellaceae	Enterorhabdus	Human (USA/Malawi/Venezuela)	TACGTAGGGGGCGAGCGTTATCCGGAATGATTGGGCGTAAAGCGCGCGCAGGCGGCCGCTCAAGCGGGACCTCTAACCCCGGGGCTCAACCCCGGGCCGG
ASV14980	490	-0.484598	TRUE	FALSE	Malawi (Rural)	d__Bacteria	Firmicutes	Eubacteriales	Anaerofustaceae	Anaerofustis	Human (USA/Malawi/Venezuela)	TACGTAGGGGGCAAGCGTTGTCCGGATTCACTGGGCGTAAAGAGCACGTAGGCGGTTAATTAAGTCAGGTGTGAAAGTTTTCGGCTCAACCGGAAAAGTG
ASV14999	758	-0.479077	TRUE	TRUE	USA (Urban)	d__Bacteria	Firmicutes	RF39	RF39	RF39	Human (USA/Malawi/Venezuela)	TACGTAGGGAGCGAGCGTTATCCGGAATTATTGGGTGTAAAGCGTGTGTAGGCGGGAAATTAAGTCTAAGGTCTAAGCCCGGAGCTCAACTCCGGTTCGC
ASV14999	786	0.259147	TRUE	TRUE	USA (Urban)	d__Bacteria	Firmicutes	RF39	RF39	RF39	Human (USA/Malawi/Venezuela)	TACGTAGGGAGCGAGCGTTATCCGGAATTATTGGGTGTAAAGCGTGTGTAGGCGGGAAATTAAGTCTAAGGTCTAAGCCCGGAGCTCAACTCCGGTTCGC
ASV15000	479	0.120238	TRUE	FALSE	USA (Urban)	d__Bacteria	Firmicutes	Erysipelotrichales	Erysipelotrichaceae	Holdemania	Human (USA/Malawi/Venezuela)	TACGTAGGTGGCGAGCGTTATCCGGAATTATTGGGCGTAAAGGGTGCGCAGGCGGTTTTTTAAGTTTAAGGTGAAAGCGTGGGGCTTAACCCCATATAGC
ASV15012	510	-0.106435	TRUE	FALSE	Malawi (Rural)	d__Bacteria	Firmicutes	Christensenellales	Christensenellaceae	Christensenellaceae_R-7_group	Human (USA/Malawi/Venezuela)	TACGTAGGGGGCAAGCGTTGTCCGGAATGACTGGGCGTAAAGGGCGTGTAGGCGGCCGATTAAGTATGGAGTGAAAGTCCATTTTTCAAGGATGGAATTG
ASV15016	546	-0.0537515	TRUE	FALSE	Malawi (Rural)	d__Bacteria	Firmicutes	NA	NA	NA	Human (USA/Malawi/Venezuela)	TACGTAGGGGGCGAGCGTTATCCGGAATTACTGGGTGTAAAGGGTGCGTAGGCGGCAACGTAAGTCTGTTGTGAAAGGTGATGGCTTAACCAGCGAAGTG
ASV15018	802	1.15331	TRUE	TRUE	USA (Urban)	d__Bacteria	Firmicutes	NA	NA	NA	Human (USA/Malawi/Venezuela)	TACGTAGGTGGCGAGCGTTATCCGGATTTACTGGGTGTAAAGGGTGTGTAGGCGGGCTTGCAAGTCAGATGTGAAATCCCGAGGCTTAACCTCGGAACTG
ASV15048	809	-0.532638	TRUE	TRUE	Malawi (Rural)	d__Bacteria	Bacteroidota	Bacteroidales	Rikenellaceae	Rikenellaceae_RC9_gut_group	Human (USA/Malawi/Venezuela)	TACGGGGGATGCGAGCGTTATCCGGATTCATTGGGTTTAAAGGGTGCGTAGGCTGTGCGTCAAGTCGGGGGTGAAATTCCGGTGCTCAACACCGGGGCTG
ASV15048	805	0.601767	TRUE	TRUE	Venezuela (Rural)	d__Bacteria	Bacteroidota	Bacteroidales	Rikenellaceae	Rikenellaceae_RC9_gut_group	Human (USA/Malawi/Venezuela)	TACGGGGGATGCGAGCGTTATCCGGATTCATTGGGTTTAAAGGGTGCGTAGGCTGTGCGTCAAGTCGGGGGTGAAATTCCGGTGCTCAACACCGGGGCTG
ASV15076	635	-0.940298	TRUE	TRUE	Malawi (Rural)	d__Bacteria	Firmicutes	Oscillospirales	Oscillospiraceae	UCG-005	Human (USA/Malawi/Venezuela)	TACGTAGGGAGCGAGCGTTGTCCGGATTTACTGGGTGTAAAGGGCGTGTAGGCGGAGATGCAAGTCAGGAGTGAAATCTGGGGGCTCAACCCCCAAACTG
ASV15076	526	0.869461	TRUE	FALSE	Venezuela (Rural)	d__Bacteria	Firmicutes	Oscillospirales	Oscillospiraceae	UCG-005	Human (USA/Malawi/Venezuela)	TACGTAGGGAGCGAGCGTTGTCCGGATTTACTGGGTGTAAAGGGCGTGTAGGCGGAGATGCAAGTCAGGAGTGAAATCTGGGGGCTCAACCCCCAAACTG
ASV15162	803	2.10401	TRUE	TRUE	USA (Urban)	d__Bacteria	Firmicutes	Lachnospirales	Lachnospiraceae	Anaerostipes	Human (USA/Malawi/Venezuela)	TACGTAGGGGGCAAGCGTTATCCGGAATTACTGGGTGTAAAGGGTGCGTAGGTGGTATGGCAAGTCAGAAGTGAAAACCCAGGGCTTAACTCTGGGACTG
ASV15162	741	-1.61569	TRUE	TRUE	USA (Urban)	d__Bacteria	Firmicutes	Lachnospirales	Lachnospiraceae	Anaerostipes	Human (USA/Malawi/Venezuela)	TACGTAGGGGGCAAGCGTTATCCGGAATTACTGGGTGTAAAGGGTGCGTAGGTGGTATGGCAAGTCAGAAGTGAAAACCCAGGGCTTAACTCTGGGACTG
ASV15216	523	0.0323327	TRUE	FALSE	USA (Urban)	d__Bacteria	Bacteroidota	Bacteroidales	Prevotellaceae	Paraprevotella	Human (USA/Malawi/Venezuela)	TACGGAAGATGCGAGCGTTATCCGGATTTATTGGGTTTAAAGGGAGCGTAGGCGGGCTTTTAAGTCAGCGGTCAAATGCCACGGCTCAACCGTGGCCAGC
ASV15216	453	-0.0612071	TRUE	FALSE	USA (Urban)	d__Bacteria	Bacteroidota	Bacteroidales	Prevotellaceae	Paraprevotella	Human (USA/Malawi/Venezuela)	TACGGAAGATGCGAGCGTTATCCGGATTTATTGGGTTTAAAGGGAGCGTAGGCGGGCTTTTAAGTCAGCGGTCAAATGCCACGGCTCAACCGTGGCCAGC
ASV15306	584	-0.487888	TRUE	FALSE	Malawi (Rural)	d__Bacteria	Firmicutes	Christensenellales	Christensenellaceae	Christensenellaceae_R-7_group	Human (USA/Malawi/Venezuela)	TACGTAGGGGGCAAGCGTTGTCCGGAATTATTGGGCGTAAAGGGTGCGTAGGCGGCCTTACAAGTTGGATGTGAAATCCCCGTGCTTAACATGGGAACTG
ASV15306	491	0.478493	TRUE	FALSE	Venezuela (Rural)	d__Bacteria	Firmicutes	Christensenellales	Christensenellaceae	Christensenellaceae_R-7_group	Human (USA/Malawi/Venezuela)	TACGTAGGGGGCAAGCGTTGTCCGGAATTATTGGGCGTAAAGGGTGCGTAGGCGGCCTTACAAGTTGGATGTGAAATCCCCGTGCTTAACATGGGAACTG
ASV15343	845	0.603677	TRUE	TRUE	USA (Urban)	d__Bacteria	Firmicutes	Erysipelotrichales	Erysipelotrichaceae	Holdemania	Human (USA/Malawi/Venezuela)	TACGTAGGTGGCGAGCGTTATCCGGAATTATTGGGCGTAAAGGGTGCGCAGGCGGTTTGTTAAGTTTAAGGTGAAAGCGTGGGGCTTAACCCCATATAGC
ASV15343	799	-0.867373	TRUE	TRUE	USA (Urban)	d__Bacteria	Firmicutes	Erysipelotrichales	Erysipelotrichaceae	Holdemania	Human (USA/Malawi/Venezuela)	TACGTAGGTGGCGAGCGTTATCCGGAATTATTGGGCGTAAAGGGTGCGCAGGCGGTTTGTTAAGTTTAAGGTGAAAGCGTGGGGCTTAACCCCATATAGC
ASV15362	794	-0.014138	TRUE	TRUE	Malawi (Rural)	d__Archaea	Euryarchaeota	Methanobacteriales	Methanobacteriaceae	Methanosphaera	Human (USA/Malawi/Venezuela)	CACCGGCAGCTCAAGTGGTAGCTGTTTTTATTGGGCCTAAAGCGTTCGTAGCCGGTTTGATAAGTCTTTGGTGAAAGCTTGTAGCTTAACTATAAGAATT
ASV15460	757	-0.129246	TRUE	TRUE	USA (Urban)	d__Bacteria	Firmicutes	Lactobacillales	Enterococcaceae	Enterococcus	Human (USA/Malawi/Venezuela)	TACGTAGGTGGCAAGCGTTGTCCGGATTTATTGGGCGTAAAGCGAGCGCAGGCGGTTTCTTAAGTCTGATGTGAAAGCCCCCGGCTCAACCGGGGAGGGG
ASV15460	772	0.328848	TRUE	TRUE	USA (Urban)	d__Bacteria	Firmicutes	Lactobacillales	Enterococcaceae	Enterococcus	Human (USA/Malawi/Venezuela)	TACGTAGGTGGCAAGCGTTGTCCGGATTTATTGGGCGTAAAGCGAGCGCAGGCGGTTTCTTAAGTCTGATGTGAAAGCCCCCGGCTCAACCGGGGAGGGG
ASV15512	479	-0.010895	TRUE	FALSE	Malawi (Rural)	d__Bacteria	Firmicutes	NA	NA	NA	Human (USA/Malawi/Venezuela)	TACGTAGGTGGCGAGCGTTGTCCGGATTTACTGGGTGTAAAGGGCGAGTAGGCGGGCTAACAAGTCAGATGTGAAATACCGAGGCTCAACCTCGGGGCTG
ASV15553	459	0.0504818	TRUE	FALSE	USA (Urban)	d__Bacteria	Bacteroidota	Bacteroidales	Barnesiellaceae	Coprobacter	Human (USA/Malawi/Venezuela)	TACGGAAGATGCGAGCGTTATCCGGATTTATTGGGTTTAAAGGGTGCGTAGGCGGAAGAATAAGTCAGCGGTGAAATGCTTCAGCTCAACTGGAGAATTG
ASV15602	450	0.417409	TRUE	FALSE	USA (Urban)	d__Bacteria	Firmicutes	Oscillospirales	Ruminococcaceae	[Eubacterium]_siraeum_group	Human (USA/Malawi/Venezuela)	TACGTAGGTGGCAAGCGTTGTCCGGAATTACTGGGTGTAAAGGGAGTGTAGGCGGGATGTCAAGTCAGAAGTGAAAATTACGGGCTCAACTCGTAACCTG
ASV15790	832	-0.696921	TRUE	TRUE	Malawi (Rural)	d__Bacteria	Firmicutes	Oscillospirales	Oscillospiraceae	UCG-005	Human (USA/Malawi/Venezuela)	TACGTAGGTTGCAAGCGTTGTCCGGATTTACTGGGTGTAAAGGGCGTGTAGGCGGAGATGCAAGTTAGGAGTGAAATCTATGGGCTCAACCCATAAACTG
ASV15790	837	1.50747	TRUE	TRUE	Venezuela (Rural)	d__Bacteria	Firmicutes	Oscillospirales	Oscillospiraceae	UCG-005	Human (USA/Malawi/Venezuela)	TACGTAGGTTGCAAGCGTTGTCCGGATTTACTGGGTGTAAAGGGCGTGTAGGCGGAGATGCAAGTTAGGAGTGAAATCTATGGGCTCAACCCATAAACTG
ASV15793	477	0.567854	TRUE	FALSE	Venezuela (Rural)	d__Bacteria	Firmicutes	Peptostreptococcales-Tissierellales	Anaerovoracaceae	Family_XIII_AD3011_group	Human (USA/Malawi/Venezuela)	TACGTAGGGGGCAAGCGTTATCCGGAATTATTGGGCGTAAAGAGTGCGTAGGTGGTTACCTAAGCAGGGGGTGAAAGGCAATGGCTCAACCATTGTTAGC
ASV15793	569	-0.573777	TRUE	FALSE	Malawi (Rural)	d__Bacteria	Firmicutes	Peptostreptococcales-Tissierellales	Anaerovoracaceae	Family_XIII_AD3011_group	Human (USA/Malawi/Venezuela)	TACGTAGGGGGCAAGCGTTATCCGGAATTATTGGGCGTAAAGAGTGCGTAGGTGGTTACCTAAGCAGGGGGTGAAAGGCAATGGCTCAACCATTGTTAGC
ASV15809	554	-0.170745	TRUE	FALSE	Malawi (Rural)	d__Bacteria	Firmicutes	Erysipelotrichales	Erysipelatoclostridiaceae	Erysipelatoclostridium	Human (USA/Malawi/Venezuela)	TACGTAGGTGGCGAGCGTTATCCGGAATCATTGGGCGTAAAGAGGGAGCAGGCGGCAGTGCAGGTCTGCGGTGAAAGACCGGAGCTAAACTTCGGTAAGC
ASV15809	435	0.165255	TRUE	FALSE	Venezuela (Rural)	d__Bacteria	Firmicutes	Erysipelotrichales	Erysipelatoclostridiaceae	Erysipelatoclostridium	Human (USA/Malawi/Venezuela)	TACGTAGGTGGCGAGCGTTATCCGGAATCATTGGGCGTAAAGAGGGAGCAGGCGGCAGTGCAGGTCTGCGGTGAAAGACCGGAGCTAAACTTCGGTAAGC
ASV15855	783	-0.831062	TRUE	TRUE	USA (Urban)	d__Bacteria	Firmicutes	Monoglobales	Monoglobaceae	Monoglobus	Human (USA/Malawi/Venezuela)	TACGTAGGTGGCAAGCGTTGTCCGGATTTACTGGGTGTAAAGGGCGTGTAGGCGGGTAGACAAGTCAGATGTGAAATACCGGGGCTCAACTCCGGGGCTG
ASV15855	817	0.819798	TRUE	TRUE	USA (Urban)	d__Bacteria	Firmicutes	Monoglobales	Monoglobaceae	Monoglobus	Human (USA/Malawi/Venezuela)	TACGTAGGTGGCAAGCGTTGTCCGGATTTACTGGGTGTAAAGGGCGTGTAGGCGGGTAGACAAGTCAGATGTGAAATACCGGGGCTCAACTCCGGGGCTG
ASV15886	804	0.733644	TRUE	TRUE	USA (Urban)	d__Bacteria	Firmicutes	Christensenellales	Christensenellaceae	Christensenellaceae_R-7_group	Human (USA/Malawi/Venezuela)	TACGTAGGGGGCGAGCGTTGTCCGGAATGATTGGGCGTAAAGGGCGTGTAGGCGGCTTTATAAGTCTGGAGTGAAAGTCCTGTTTTCAAGATGGGAATTG
ASV15886	790	-0.337052	TRUE	TRUE	USA (Urban)	d__Bacteria	Firmicutes	Christensenellales	Christensenellaceae	Christensenellaceae_R-7_group	Human (USA/Malawi/Venezuela)	TACGTAGGGGGCGAGCGTTGTCCGGAATGATTGGGCGTAAAGGGCGTGTAGGCGGCTTTATAAGTCTGGAGTGAAAGTCCTGTTTTCAAGATGGGAATTG
ASV15901	452	0.414834	TRUE	FALSE	Venezuela (Rural)	d__Bacteria	Proteobacteria	Burkholderiales	Comamonadaceae	NA	Human (USA/Malawi/Venezuela)	TACGTAGGGTGCAAGCGTTAATCGGAATTACTGGGCGTAAAGCGTGCGCAGGCGGTTTTGTAAGACAGGCGTGAAATCCCCGGGCTCAACCTGGGAATTG
ASV15901	517	-0.592128	TRUE	FALSE	Malawi (Rural)	d__Bacteria	Proteobacteria	Burkholderiales	Comamonadaceae	NA	Human (USA/Malawi/Venezuela)	TACGTAGGGTGCAAGCGTTAATCGGAATTACTGGGCGTAAAGCGTGCGCAGGCGGTTTTGTAAGACAGGCGTGAAATCCCCGGGCTCAACCTGGGAATTG
ASV15933	519	0.0135257	TRUE	FALSE	Venezuela (Rural)	d__Bacteria	Firmicutes	Peptostreptococcales-Tissierellales	Peptostreptococcales-Tissierellales	Peptoniphilus	Human (USA/Malawi/Venezuela)	TACGTAGGGAGCAAGCGTTGTCCGGAATCACTGGGCGTAAAGGGTTCGCAGGCGGCAATGCAAGTCTCGTGTGAAAGGCAAGGGCTCAACCCTTGTAAGC
ASV15933	635	-0.0582538	TRUE	TRUE	Malawi (Rural)	d__Bacteria	Firmicutes	Peptostreptococcales-Tissierellales	Peptostreptococcales-Tissierellales	Peptoniphilus	Human (USA/Malawi/Venezuela)	TACGTAGGGAGCAAGCGTTGTCCGGAATCACTGGGCGTAAAGGGTTCGCAGGCGGCAATGCAAGTCTCGTGTGAAAGGCAAGGGCTCAACCCTTGTAAGC
ASV16004	780	-1.50022	TRUE	TRUE	USA (Urban)	d__Bacteria	Firmicutes	Peptostreptococcales-Tissierellales	Anaerovoracaceae	uncultured	Human (USA/Malawi/Venezuela)	TACGTAGGGGGCGAGCGTTATCCGGAATTATTGGGCGTAAAGAGTGCGTAGGCGGTTTCTTAAGCGCGGGGTGAAAGGCAGTGGCTTAACCACTGTTAGC
ASV16030	509	-0.824959	TRUE	FALSE	Malawi (Rural)	d__Bacteria	Verrucomicrobiota	Verrucomicrobiales	Akkermansiaceae	Akkermansia	Human (USA/Malawi/Venezuela)	TACAGAGGTCTCAAGCGTTGTTCGGAATCACTGGGCGTAAAGCGTGCGTAGGCTGTTTCGTAAGTCGTGTGTGAAAGGTGCGGGCTCAACCCGCGGACGG
ASV16047	786	2.14307	TRUE	TRUE	USA (Urban)	d__Bacteria	Actinobacteriota	Coriobacteriales	Eggerthellaceae	Slackia	Human (USA/Malawi/Venezuela)	TACGTAGGGGGCGAGCGTTATCCGGAATCATTGGGCGTAAAGCGCGCGCAGGCGGGCTTTCAAGCGGCGGCGTCGAAGCCGGGGGCTCAACCCCCGGAAG
ASV16047	776	-2.04145	TRUE	TRUE	USA (Urban)	d__Bacteria	Actinobacteriota	Coriobacteriales	Eggerthellaceae	Slackia	Human (USA/Malawi/Venezuela)	TACGTAGGGGGCGAGCGTTATCCGGAATCATTGGGCGTAAAGCGCGCGCAGGCGGGCTTTCAAGCGGCGGCGTCGAAGCCGGGGGCTCAACCCCCGGAAG
ASV16103	566	-0.406757	TRUE	FALSE	Malawi (Rural)	d__Bacteria	Firmicutes	Christensenellales	Christensenellaceae	NA	Human (USA/Malawi/Venezuela)	TACGTAGGGAGCAAGCGTTGTCCGGAATTACTGGGCGTAAAGGGTGCGTAGGTGGCCATGTAAGTCAGGTGTGAAAGACCGGGGCTCAACCCCGGGGCGG
ASV16103	540	0.0106306	TRUE	FALSE	Venezuela (Rural)	d__Bacteria	Firmicutes	Christensenellales	Christensenellaceae	NA	Human (USA/Malawi/Venezuela)	TACGTAGGGAGCAAGCGTTGTCCGGAATTACTGGGCGTAAAGGGTGCGTAGGTGGCCATGTAAGTCAGGTGTGAAAGACCGGGGCTCAACCCCGGGGCGG
ASV16106	777	-0.68352	TRUE	TRUE	USA (Urban)	d__Bacteria	Firmicutes	Clostridia_vadinBB60_group	Clostridia_vadinBB60_group	Clostridia_vadinBB60_group	Human (USA/Malawi/Venezuela)	TACGTAGGGGGCGAGCGTTGTCCGGAATTACTGGGCGTAAAGGGCGCGTAGGCGGCCGGATAAGTTAGATGTGAAATCCCCGGGCTCAACCTGGGTGTTG
ASV16107	795	-0.420914	TRUE	TRUE	USA (Urban)	d__Bacteria	Firmicutes	Oscillospirales	Oscillospiraceae	NA	Human (USA/Malawi/Venezuela)	TACGTAGGTGGCAAGCGTTATCCGGATTTACTGGGTGTAAAGGGCGTGTAGGCGGGAAGGCAAGTCAGATGTGAAAACTATGGGCTCAACCCATAGCCTG
ASV16107	835	0.372074	TRUE	TRUE	USA (Urban)	d__Bacteria	Firmicutes	Oscillospirales	Oscillospiraceae	NA	Human (USA/Malawi/Venezuela)	TACGTAGGTGGCAAGCGTTATCCGGATTTACTGGGTGTAAAGGGCGTGTAGGCGGGAAGGCAAGTCAGATGTGAAAACTATGGGCTCAACCCATAGCCTG
ASV16135	766	-0.883984	TRUE	TRUE	USA (Urban)	d__Bacteria	Firmicutes	Oscillospirales	Ruminococcaceae	NA	Human (USA/Malawi/Venezuela)	TACGTAGGGAGCAAGCGTTGTCCGGAATTACTGGGTGTAAAGGGTGCGTAGGCGGGACTGCAAGTCAGGTGTGAAAACGGTCGGCTCAACCGATCGCCTG
ASV16135	782	0.83291	TRUE	TRUE	USA (Urban)	d__Bacteria	Firmicutes	Oscillospirales	Ruminococcaceae	NA	Human (USA/Malawi/Venezuela)	TACGTAGGGAGCAAGCGTTGTCCGGAATTACTGGGTGTAAAGGGTGCGTAGGCGGGACTGCAAGTCAGGTGTGAAAACGGTCGGCTCAACCGATCGCCTG
ASV16158	709	-0.329246	TRUE	TRUE	USA (Urban)	d__Bacteria	Firmicutes	Christensenellales	Christensenellaceae	Christensenellaceae_R-7_group	Human (USA/Malawi/Venezuela)	TACGTAGGGGGCGAGCGTTGTCCGGAATGATTGGGCGTAAAGGGCGCGTAGGCGGCCTGCTAAGTCTGAAGTGAAAGTCCTGCTTTCAAGGTGGGAAGTG
ASV16163	485	-0.140212	TRUE	FALSE	Malawi (Rural)	d__Bacteria	Firmicutes	Acidaminococcales	Acidaminococcaceae	Acidaminococcus	Human (USA/Malawi/Venezuela)	TACGTAGGTGGCAAGCGTTGTCCGGAATTATTGGGCGTAAAGAGCATGTAGGCGGGCTTTTAAGTCTGACGTGAAAATGCGGGGCTTAACCCCGTATGGC
ASV16177	860	1.10624	TRUE	TRUE	USA (Urban)	d__Bacteria	Firmicutes	Oscillospirales	Ruminococcaceae	Incertae_Sedis	Human (USA/Malawi/Venezuela)	TACGTAGGGAGCAAGCGTTGTCCGGATTTACTGGGTGTAAAGGGTGCGTAGGCGGCTAGGCAAGTCAGACGTGAAAACCATGGGCTCAACCTGTGGACTG
ASV16177	832	-1.1851	TRUE	TRUE	USA (Urban)	d__Bacteria	Firmicutes	Oscillospirales	Ruminococcaceae	Incertae_Sedis	Human (USA/Malawi/Venezuela)	TACGTAGGGAGCAAGCGTTGTCCGGATTTACTGGGTGTAAAGGGTGCGTAGGCGGCTAGGCAAGTCAGACGTGAAAACCATGGGCTCAACCTGTGGACTG
ASV16362	821	1.22654	TRUE	TRUE	Venezuela (Rural)	d__Bacteria	Firmicutes	Oscillospirales	Ruminococcaceae	NA	Human (USA/Malawi/Venezuela)	AACGTAGGGTGCTAGCGTTGTCCGGAATTACTGGGTGTAAAGGGAGCGCAGGTGGCAGTGCAAGTTGGATGTAAAATCTACGGGCTCAACCCGTATAAGC
ASV16362	842	-1.17266	TRUE	TRUE	Malawi (Rural)	d__Bacteria	Firmicutes	Oscillospirales	Ruminococcaceae	NA	Human (USA/Malawi/Venezuela)	AACGTAGGGTGCTAGCGTTGTCCGGAATTACTGGGTGTAAAGGGAGCGCAGGTGGCAGTGCAAGTTGGATGTAAAATCTACGGGCTCAACCCGTATAAGC
ASV16527	846	6.04294	TRUE	TRUE	Venezuela (Rural)	d__Bacteria	Bacteroidota	Bacteroidales	Prevotellaceae	Prevotella	Human (USA/Malawi/Venezuela)	TACGGAAGGTCCGGGCGTTATCCGGATTTATTGGGTTTAAAGGGAGCGTAGGCCGGAGATTAAGCGTGTTGTGAAATGTAGACGCTCAACGTCTGCACTG
ASV16527	874	-7.13989	TRUE	TRUE	Malawi (Rural)	d__Bacteria	Bacteroidota	Bacteroidales	Prevotellaceae	Prevotella	Human (USA/Malawi/Venezuela)	TACGGAAGGTCCGGGCGTTATCCGGATTTATTGGGTTTAAAGGGAGCGTAGGCCGGAGATTAAGCGTGTTGTGAAATGTAGACGCTCAACGTCTGCACTG
ASV16535	563	0.391788	TRUE	FALSE	USA (Urban)	d__Bacteria	Firmicutes	Lachnospirales	Lachnospiraceae	[Eubacterium]_ventriosum_group	Human (USA/Malawi/Venezuela)	TACGTATGGGGCAAGCGTTATCCGGATTTACTGGGTGTAAAGGGAGCGTAGGCGGTAAGACAAGTCAGAAGTGAAAGGCTGGGGCTCAACCCTGGGACTG
ASV16586	531	-0.428318	TRUE	FALSE	Malawi (Rural)	d__Bacteria	Firmicutes	Eubacteriales	Eubacteriaceae	Eubacterium	Human (USA/Malawi/Venezuela)	TACGTAGGGGACAAGCGTTGTCCGGAATGACTGGGCGTAAAGGGCGCGTAGGCGGTCTATTAAGTCTGATGTGAAAGGTACCGGCTCAACCGGTGAAGTG
ASV16684	500	0.0510433	TRUE	FALSE	USA (Urban)	d__Bacteria	Firmicutes	Oscillospirales	Oscillospiraceae	Intestinimonas	Human (USA/Malawi/Venezuela)	TACGTAGGTGGCAAGCGTTATCCGGATTTACTGGGTGTAAAGGGCGTGTAGGCGGGACTGCAAGTCAGATGTGAAAACTATGGGCTCAACCCATAGCCTG
ASV16694	805	0.689742	TRUE	TRUE	Venezuela (Rural)	d__Bacteria	Firmicutes	RF39	RF39	RF39	Human (USA/Malawi/Venezuela)	TACGTAGGTGGCGAGCGTTATCCGGATTTATTGGGCGTAAAGGGTGCGCAGACGGTTTATTAAGTCTAAAATCAAATCTTGGGGCTCAACCCCATTCCGT
ASV16694	775	0.236919	TRUE	TRUE	USA (Urban)	d__Bacteria	Firmicutes	RF39	RF39	RF39	Human (USA/Malawi/Venezuela)	TACGTAGGTGGCGAGCGTTATCCGGATTTATTGGGCGTAAAGGGTGCGCAGACGGTTTATTAAGTCTAAAATCAAATCTTGGGGCTCAACCCCATTCCGT
ASV16740	622	0.0775784	TRUE	TRUE	USA (Urban)	d__Bacteria	Bacteroidota	Bacteroidales	Marinifilaceae	Butyricimonas	Human (USA/Malawi/Venezuela)	TACGGGGGATGCGAGCGTTATCCGGATTTATTGGGTTTAAAGGGCGCGTAGGCGGGACGCCAAGTCAGCGGTAAAAGACTGCAGCTAAACTGTAGCACGC
ASV16747	819	1.00376	TRUE	TRUE	USA (Urban)	d__Bacteria	Firmicutes	Clostridia_vadinBB60_group	Clostridia_vadinBB60_group	Clostridia_vadinBB60_group	Human (USA/Malawi/Venezuela)	TACGTAGGTGGCAAGCGTTGTCCGGAATGACTGGGCGTAAAGGGAGCGTAGGCGGCGCAACAAGTTAGGAGTGAAATCCCGAGGCTTAACCTCGGAACTG
ASV16827	494	-0.709583	TRUE	FALSE	Malawi (Rural)	d__Bacteria	Firmicutes	Peptostreptococcales-Tissierellales	Peptostreptococcales-Tissierellales	Peptoniphilus	Human (USA/Malawi/Venezuela)	TACGTAGGGGGCGAGCGTTGTCCGGAATTACTGGGCGTAAAGGGTTCGCAGGCGGCATGGCAAGTCCGATGTAAAAGGCGAAGGCTCAACCTTCGTAAGC
ASV16902	766	1.55232	TRUE	TRUE	USA (Urban)	d__Bacteria	Firmicutes	Lachnospirales	Lachnospiraceae	Blautia	Human (USA/Malawi/Venezuela)	TACGTAGGGGGCAAGCGTTATCCGGATTTACTGGGTGTAAAGGGAGCGTAGACGGATGGACAAGTCTGATGTGAAAGGCTGGGGCTCAACCCCGGGACTG
ASV16902	756	-1.72874	TRUE	TRUE	USA (Urban)	d__Bacteria	Firmicutes	Lachnospirales	Lachnospiraceae	Blautia	Human (USA/Malawi/Venezuela)	TACGTAGGGGGCAAGCGTTATCCGGATTTACTGGGTGTAAAGGGAGCGTAGACGGATGGACAAGTCTGATGTGAAAGGCTGGGGCTCAACCCCGGGACTG
ASV16927	677	0.288767	TRUE	TRUE	USA (Urban)	d__Bacteria	Firmicutes	Oscillospirales	Oscillospiraceae	NA	Human (USA/Malawi/Venezuela)	TACGTAGGTGGCAAGCGTTATCCGGATTTACTGGGTGTAAAGGGCGTGTAGGCGGGATTGCAAGTCAGATGTGAAAACCACGGGCTCAACCTGTGGCCTG
ASV16927	589	-0.32485	TRUE	FALSE	USA (Urban)	d__Bacteria	Firmicutes	Oscillospirales	Oscillospiraceae	NA	Human (USA/Malawi/Venezuela)	TACGTAGGTGGCAAGCGTTATCCGGATTTACTGGGTGTAAAGGGCGTGTAGGCGGGATTGCAAGTCAGATGTGAAAACCACGGGCTCAACCTGTGGCCTG
ASV17067	776	-0.343298	TRUE	TRUE	Malawi (Rural)	d__Bacteria	Firmicutes	Clostridia_UCG-014	Clostridia_UCG-014	Clostridia_UCG-014	Human (USA/Malawi/Venezuela)	TACGTAGGGAGCAAGCGTTATCCGGATTTATTGGGTGTAAAGGGTGCGTAGACGGGAAGACAAGTTGGTTGTGAAAGCCCTCGGCTCAACTGAGGAACTG
ASV1712	677	0.872919	TRUE	TRUE	Venezuela (Rural)	d__Bacteria	Firmicutes	Erysipelotrichales	Erysipelotrichaceae	Holdemanella	Human (USA/Malawi/Venezuela)	TACGTAGGTGGCGAGCGTTATCCGGAATGATTGGGCGTAAAGGGTGCGTAGGTGGCAGATCAAGTCTGGAGTAAAAGGTATGGGCTCAACCCGTACTTGC
ASV1712	727	-0.771877	TRUE	TRUE	Malawi (Rural)	d__Bacteria	Firmicutes	Erysipelotrichales	Erysipelotrichaceae	Holdemanella	Human (USA/Malawi/Venezuela)	TACGTAGGTGGCGAGCGTTATCCGGAATGATTGGGCGTAAAGGGTGCGTAGGTGGCAGATCAAGTCTGGAGTAAAAGGTATGGGCTCAACCCGTACTTGC
ASV17144	490	-0.402451	TRUE	FALSE	Malawi (Rural)	d__Bacteria	Firmicutes	Peptostreptococcales-Tissierellales	Anaerovoracaceae	Family_XIII_AD3011_group	Human (USA/Malawi/Venezuela)	TACGTAGGGGGCAAGCGTTATCCGGAATTATTGGGCGTAAAGGGTACGTAGGTGGTTACCTAAGCACAGGGTATAAGGCAATAGCTTAACTATTGTTCGC
ASV17147	463	-0.0375784	TRUE	FALSE	Malawi (Rural)	d__Bacteria	Firmicutes	Lachnospirales	Defluviitaleaceae	Defluviitaleaceae_UCG-011	Human (USA/Malawi/Venezuela)	TACGTAGGGGGCGAGCGTTATCCGGAATTACTGGGTGTAAAGGGTGCGTAGGCGGTACGGCAAGTTTGATGTGAAACCCTCGGGCTTAACCCGAGGCATG
ASV17256	505	0.0152745	TRUE	FALSE	USA (Urban)	d__Bacteria	Firmicutes	Acidaminococcales	Acidaminococcaceae	Succiniclasticum	Human (USA/Malawi/Venezuela)	TACGTAGGTGGCAAGCGTTGTCCGGAATTATTGGGCGTAAAGCGCATGTAGGCGGTTTGGTAAGTCGGTCGTGAAAATGCGGTGCTTAACGCCGTATGGC
ASV17258	516	-0.19219	TRUE	FALSE	Malawi (Rural)	d__Archaea	Euryarchaeota	Methanobacteriales	Methanobacteriaceae	Methanobrevibacter	Human (USA/Malawi/Venezuela)	CACCGGCAGCTCTAGTGGTAGCAGTTTTTATTGGGCCTAAAGCGTCCGTAGCCGGTTTAATAAGTCTCTGGGGAAATCCTGCAGCTTAACTGTGGGAATT
ASV17278	792	0.762006	TRUE	TRUE	USA (Urban)	d__Bacteria	Firmicutes	Clostridia_vadinBB60_group	Clostridia_vadinBB60_group	Clostridia_vadinBB60_group	Human (USA/Malawi/Venezuela)	TACGTAGGGGGCAAGCGTTGTCCGGAATGACTGGGCGTAAAGGGAGTGTAGGCGGCATAGCAAGTTAGATGTGAAAGCCCGCAGCTTAACTGCGGAACTG
ASV17278	774	-1.396	TRUE	TRUE	USA (Urban)	d__Bacteria	Firmicutes	Clostridia_vadinBB60_group	Clostridia_vadinBB60_group	Clostridia_vadinBB60_group	Human (USA/Malawi/Venezuela)	TACGTAGGGGGCAAGCGTTGTCCGGAATGACTGGGCGTAAAGGGAGTGTAGGCGGCATAGCAAGTTAGATGTGAAAGCCCGCAGCTTAACTGCGGAACTG
ASV1731	735	1.04452	TRUE	TRUE	Venezuela (Rural)	d__Bacteria	Firmicutes	Lachnospirales	Lachnospiraceae	Lachnospiraceae_UCG-010	Human (USA/Malawi/Venezuela)	TACGTAGGGGGCAAGCGTTATCCGGAATTACTGGGTGTAAAGGGAGCGTAGGCGGCACGCCAAGCCAGATGTGAAAGCCCGAGGCTTAACCTCGCGGATT
ASV17325	492	0.117593	TRUE	FALSE	USA (Urban)	d__Bacteria	Firmicutes	Oscillospirales	Butyricicoccaceae	UCG-009	Human (USA/Malawi/Venezuela)	TACGTAGGTGGCAAGCGTTATCCGGATTTACTGGGTGTAAAGGGCGAGTAGGCGGGATTGCAAGTCAGATGTGAAAACTATGGGCTCAACCCATAGACTG
ASV17325	628	-0.0210183	TRUE	TRUE	USA (Urban)	d__Bacteria	Firmicutes	Oscillospirales	Butyricicoccaceae	UCG-009	Human (USA/Malawi/Venezuela)	TACGTAGGTGGCAAGCGTTATCCGGATTTACTGGGTGTAAAGGGCGAGTAGGCGGGATTGCAAGTCAGATGTGAAAACTATGGGCTCAACCCATAGACTG
ASV17326	783	-1.39541	TRUE	TRUE	USA (Urban)	d__Archaea	Euryarchaeota	Methanobacteriales	Methanobacteriaceae	Methanobrevibacter	Human (USA/Malawi/Venezuela)	CACCGGCAGCTCTAGTGGTAGCAGGTTTTATTGGGCCTAAAGCGTCCGTAGCCGGTTTAATAAGTCTCTGGTGAAATCCTGCAGCTTAACTGTGGGAATT
ASV17326	804	1.14381	TRUE	TRUE	USA (Urban)	d__Archaea	Euryarchaeota	Methanobacteriales	Methanobacteriaceae	Methanobrevibacter	Human (USA/Malawi/Venezuela)	CACCGGCAGCTCTAGTGGTAGCAGGTTTTATTGGGCCTAAAGCGTCCGTAGCCGGTTTAATAAGTCTCTGGTGAAATCCTGCAGCTTAACTGTGGGAATT
ASV17329	778	-1.21919	TRUE	TRUE	USA (Urban)	d__Bacteria	Firmicutes	Christensenellales	Christensenellaceae	uncultured	Human (USA/Malawi/Venezuela)	TACGTAGGGAGCGAGCGTTGTCCGGAATTACTGGGCGTAAAGGGTGCGTAGGCGGTTTTTTAAGTCAGATGTGAAATACCCGTGCTCAACATGGGGGGTG
ASV17329	791	0.843068	TRUE	TRUE	USA (Urban)	d__Bacteria	Firmicutes	Christensenellales	Christensenellaceae	uncultured	Human (USA/Malawi/Venezuela)	TACGTAGGGAGCGAGCGTTGTCCGGAATTACTGGGCGTAAAGGGTGCGTAGGCGGTTTTTTAAGTCAGATGTGAAATACCCGTGCTCAACATGGGGGGTG
ASV17339	750	-1.28906	TRUE	TRUE	Malawi (Rural)	d__Bacteria	Firmicutes	Oscillospirales	Ruminococcaceae	Candidatus_Soleaferrea	Human (USA/Malawi/Venezuela)	TACGTAGATGGCGAGCGTTGTCCGGAATTACTGGGTGTAAAGGGAGTGTAGGCGGGCTGGTAAGTTGAATGTGAAACCTTCGGGCTCAACCCGGAGCGTG
ASV17339	657	0.976213	TRUE	TRUE	Venezuela (Rural)	d__Bacteria	Firmicutes	Oscillospirales	Ruminococcaceae	Candidatus_Soleaferrea	Human (USA/Malawi/Venezuela)	TACGTAGATGGCGAGCGTTGTCCGGAATTACTGGGTGTAAAGGGAGTGTAGGCGGGCTGGTAAGTTGAATGTGAAACCTTCGGGCTCAACCCGGAGCGTG
ASV17350	644	-0.355123	TRUE	TRUE	Malawi (Rural)	d__Bacteria	Firmicutes	Erysipelotrichales	Erysipelotrichaceae	Solobacterium	Human (USA/Malawi/Venezuela)	TACGTAGGTGGCGAGCGTTATCCGGAATTATTGGGCGTAAAGGGTGCGTAGGCGGCCTGTTAAGTAAGTGGTTAAATTGTTGGGCTCAACCCAATCCAGC
ASV17451	503	-0.569392	TRUE	FALSE	Malawi (Rural)	d__Bacteria	Actinobacteriota	Coriobacteriales	Atopobiaceae	Atopobium	Human (USA/Malawi/Venezuela)	TACGTAGGGGGCAAGCGTTATCCGGATTCATTGGGCGTAAAGCGCTCGTAGGCGGTCTGTTAGGTCGGGAGTTAAATCCGGAGGCTCAACCTCCGCCCGC
ASV17490	748	-0.41433	TRUE	TRUE	Malawi (Rural)	d__Bacteria	Bacteroidota	Bacteroidales	Rikenellaceae	Rikenellaceae_RC9_gut_group	Human (USA/Malawi/Venezuela)	TACGGGGGATGCGAGCGTTATCCGGATTCATTGGGTTTAAAGGGTGCGTAGGCGGCCGAGTAAGTCAGCGGTGAAAGACCGGGGCTCAACCCTGGAAGTG
ASV17490	722	0.465535	TRUE	TRUE	Venezuela (Rural)	d__Bacteria	Bacteroidota	Bacteroidales	Rikenellaceae	Rikenellaceae_RC9_gut_group	Human (USA/Malawi/Venezuela)	TACGGGGGATGCGAGCGTTATCCGGATTCATTGGGTTTAAAGGGTGCGTAGGCGGCCGAGTAAGTCAGCGGTGAAAGACCGGGGCTCAACCCTGGAAGTG
ASV17577	461	-0.302659	TRUE	FALSE	USA (Urban)	d__Bacteria	Firmicutes	Oscillospirales	Oscillospiraceae	Colidextribacter	Human (USA/Malawi/Venezuela)	TACGTAGGGAGCAAGCGTTATCCGGATTTACTGGGTGTAAAGGGCGTGTAGGCGGGACTGCAAGTCAGATGTGAAAACTATGGGCTTAACCCATAGCCTG
ASV17577	750	0.592802	TRUE	TRUE	USA (Urban)	d__Bacteria	Firmicutes	Oscillospirales	Oscillospiraceae	Colidextribacter	Human (USA/Malawi/Venezuela)	TACGTAGGGAGCAAGCGTTATCCGGATTTACTGGGTGTAAAGGGCGTGTAGGCGGGACTGCAAGTCAGATGTGAAAACTATGGGCTTAACCCATAGCCTG
ASV1761	610	-1.39879	TRUE	FALSE	Malawi (Rural)	d__Bacteria	Firmicutes	Oscillospirales	NA	NA	Human (USA/Malawi/Venezuela)	TACGTAGGTGGCAAGCGTTGTCCGGAATTACTGGGTGTAAAGGGAGCGTAGGCGGGTTTGCAAGTTGACTGTGAAATCTATGGGCTCAACCCATAGCTGC
ASV1761	480	1.14783	TRUE	FALSE	Venezuela (Rural)	d__Bacteria	Firmicutes	Oscillospirales	NA	NA	Human (USA/Malawi/Venezuela)	TACGTAGGTGGCAAGCGTTGTCCGGAATTACTGGGTGTAAAGGGAGCGTAGGCGGGTTTGCAAGTTGACTGTGAAATCTATGGGCTCAACCCATAGCTGC
ASV17627	775	-2.70934	TRUE	TRUE	USA (Urban)	d__Bacteria	Firmicutes	Oscillospirales	Ruminococcaceae	Subdoligranulum	Human (USA/Malawi/Venezuela)	AACGTAGGGTGCAAGCGTTGTCCGGAATTACTGGGTGTAAAGGGAGCGCAGGCGGGAAGACAAGTTGGAAGTGAAAACCATGGGCTCAACCCATGAATTG
ASV17627	840	3.20088	TRUE	TRUE	USA (Urban)	d__Bacteria	Firmicutes	Oscillospirales	Ruminococcaceae	Subdoligranulum	Human (USA/Malawi/Venezuela)	AACGTAGGGTGCAAGCGTTGTCCGGAATTACTGGGTGTAAAGGGAGCGCAGGCGGGAAGACAAGTTGGAAGTGAAAACCATGGGCTCAACCCATGAATTG
ASV17662	526	-0.618609	TRUE	FALSE	Malawi (Rural)	d__Bacteria	Firmicutes	Oscillospirales	Ruminococcaceae	NA	Human (USA/Malawi/Venezuela)	TACGTAGGGAGCGAGCGTTGTCCGGAATTACTGGGTGTAAAGGGAGCGTAGGCGGGAAGACAAGTTGGGTGTCAAATCTACCGGCTTAACCGGTAGCCGC
ASV17662	440	0.285051	TRUE	FALSE	Venezuela (Rural)	d__Bacteria	Firmicutes	Oscillospirales	Ruminococcaceae	NA	Human (USA/Malawi/Venezuela)	TACGTAGGGAGCGAGCGTTGTCCGGAATTACTGGGTGTAAAGGGAGCGTAGGCGGGAAGACAAGTTGGGTGTCAAATCTACCGGCTTAACCGGTAGCCGC
ASV17673	481	-0.237747	TRUE	FALSE	Malawi (Rural)	d__Bacteria	Firmicutes	Oscillospirales	Ruminococcaceae	NA	Human (USA/Malawi/Venezuela)	TACGTAGGTGGCAAGCGTTGTCCGGAATTACTGGGTGTAAAGGGAGCGTAGGCGGGAAGGCAAGTCGATTGTCTAAACTATGGGCTCAACCCATAGTCGC
ASV17738	763	0.719446	TRUE	TRUE	Venezuela (Rural)	d__Bacteria	Firmicutes	Oscillospirales	Ruminococcaceae	Negativibacillus	Human (USA/Malawi/Venezuela)	TACGTAGGTGGCAAGCGTTGTCCGGAATTACTGGGTGTAAAGGGAGCGTAGGCGGGGATGCAAGTTGAATGTTTAAACTATCGGCTCAACTGATAGTCGC
ASV17738	798	-0.734058	TRUE	TRUE	Malawi (Rural)	d__Bacteria	Firmicutes	Oscillospirales	Ruminococcaceae	Negativibacillus	Human (USA/Malawi/Venezuela)	TACGTAGGTGGCAAGCGTTGTCCGGAATTACTGGGTGTAAAGGGAGCGTAGGCGGGGATGCAAGTTGAATGTTTAAACTATCGGCTCAACTGATAGTCGC
ASV17753	517	0.538076	TRUE	FALSE	Venezuela (Rural)	d__Bacteria	Firmicutes	Christensenellales	Christensenellaceae	uncultured	Human (USA/Malawi/Venezuela)	TACGTAGGGAGCAAGCGTTGTCCGGAATTACTGGGCGTAAAGGGTGCGTAGGCGGCCGTTTAAGTCAGATGTGAAATACCCGTGCTTAACATGGGGGCTG
ASV17753	619	-0.626967	TRUE	TRUE	Malawi (Rural)	d__Bacteria	Firmicutes	Christensenellales	Christensenellaceae	uncultured	Human (USA/Malawi/Venezuela)	TACGTAGGGAGCAAGCGTTGTCCGGAATTACTGGGCGTAAAGGGTGCGTAGGCGGCCGTTTAAGTCAGATGTGAAATACCCGTGCTTAACATGGGGGCTG
ASV17770	474	0.431893	TRUE	FALSE	Venezuela (Rural)	d__Bacteria	Firmicutes	Lachnospirales	Lachnospiraceae	ASF356	Human (USA/Malawi/Venezuela)	TACGTAGGGGGCAAGCGTTATCCGGAATTACTGGGTGTAAAGGGAGAGTAGGCGGTGAGGTAAGCAAGATGTGAAAGCCTTAGGCTTAACTTAAGGAATG
ASV17781	771	-0.597913	TRUE	TRUE	USA (Urban)	d__Bacteria	Bacteroidota	Bacteroidales	Rikenellaceae	Alistipes	Human (USA/Malawi/Venezuela)	TACGGAGGATCCGAGCGTTATCCGGATTTATTGGGTTTAAAGGGTGCGTAGGCTGTTTTTTAAGTTAGAGGTGAAAGCTCGACGCTCAACGTCGAAATTG
ASV17781	819	0.566249	TRUE	TRUE	USA (Urban)	d__Bacteria	Bacteroidota	Bacteroidales	Rikenellaceae	Alistipes	Human (USA/Malawi/Venezuela)	TACGGAGGATCCGAGCGTTATCCGGATTTATTGGGTTTAAAGGGTGCGTAGGCTGTTTTTTAAGTTAGAGGTGAAAGCTCGACGCTCAACGTCGAAATTG
ASV17782	460	-0.425952	TRUE	FALSE	Malawi (Rural)	d__Bacteria	Proteobacteria	Enterobacterales	Enterobacteriaceae	NA	Human (USA/Malawi/Venezuela)	TACGGAGGGTGCAAGCGTTAATCGGAATTACTGGGCGTAAAGCGCACGCAGGCGGTCTGTCAAGTCGGATGTGAAATCCCCGGGCTCAACCTGGGAACTG
ASV17782	718	1.73109	TRUE	TRUE	Venezuela (Rural)	d__Bacteria	Proteobacteria	Enterobacterales	Enterobacteriaceae	NA	Human (USA/Malawi/Venezuela)	TACGGAGGGTGCAAGCGTTAATCGGAATTACTGGGCGTAAAGCGCACGCAGGCGGTCTGTCAAGTCGGATGTGAAATCCCCGGGCTCAACCTGGGAACTG
ASV17868	510	-0.524197	TRUE	FALSE	Malawi (Rural)	d__Bacteria	Firmicutes	Oscillospirales	Ruminococcaceae	Candidatus_Soleaferrea	Human (USA/Malawi/Venezuela)	TACGTAGGTGGCGAGCGTTGTCCGGAATTACTGGGTGTAAAGGGAGCGCAGGCGGGGAGCCAAGTTGGATGTGAAATACCGCAGCTTAACTGCGGGGCTG
ASV17900	655	0.565083	TRUE	TRUE	Venezuela (Rural)	d__Bacteria	Firmicutes	Oscillospirales	Oscillospiraceae	UCG-005	Human (USA/Malawi/Venezuela)	TACGTAGGTGGCAAGCGTTGTCCGGATTTACTGGGTGTAAAGGGCGTGTAGGCGGAGAAGCAAGTCAGAAGTGAAATCCATGGGCTTAACCCATGAACTG
ASV17946	566	-0.52683	TRUE	FALSE	Malawi (Rural)	d__Bacteria	Bacteroidota	Bacteroidales	Prevotellaceae	Prevotella	Human (USA/Malawi/Venezuela)	TACGGAAGGTTCGGGCGTTATCCGGATTTATTGGGTTTAAAGGGAGCGTAGGCCGGAGATTAAGCGTGTTGTGAAATGTAGATGCTCAACATCTGCACTG
ASV17946	448	0.541305	TRUE	FALSE	Venezuela (Rural)	d__Bacteria	Bacteroidota	Bacteroidales	Prevotellaceae	Prevotella	Human (USA/Malawi/Venezuela)	TACGGAAGGTTCGGGCGTTATCCGGATTTATTGGGTTTAAAGGGAGCGTAGGCCGGAGATTAAGCGTGTTGTGAAATGTAGATGCTCAACATCTGCACTG
ASV18115	465	-0.120761	TRUE	FALSE	Malawi (Rural)	d__Bacteria	Firmicutes	Oscillospirales	Oscillospiraceae	Pseudoflavonifractor	Human (USA/Malawi/Venezuela)	TACGTAGGTGGCAAGCGTTATCCGGATTTACTGGGTGTAAAGGGCGTGTAGGCGGGACTGCAAGTCAGGTGTGAAAACCACGGGCTCAACCTGTGGCCTG
ASV18160	833	1.513	TRUE	TRUE	Venezuela (Rural)	d__Bacteria	Firmicutes	Oscillospirales	Oscillospiraceae	UCG-005	Human (USA/Malawi/Venezuela)	TACGTAGGTTGCAAGCGTTGTCCGGATTTACTGGGTGTAAAGGGCGTGTAGGCGGAGATGCAAGTCAGGAGTGAAATCCCGGGGCTCAACCCCGGAACTG
ASV18184	677	0.34785	TRUE	TRUE	USA (Urban)	d__Bacteria	Firmicutes	Peptostreptococcales-Tissierellales	Anaerovoracaceae	[Eubacterium]_brachy_group	Human (USA/Malawi/Venezuela)	TACGGAGGGGGCAAGCGTTATCCGGAATTATTGGGCGTAAAGGGTACGTAGGTGGCCTTTTAAGCGTAGGGTATAAGGCAATGGCTCAACCATTGTTCGC
ASV18184	437	0.353997	TRUE	FALSE	Venezuela (Rural)	d__Bacteria	Firmicutes	Peptostreptococcales-Tissierellales	Anaerovoracaceae	[Eubacterium]_brachy_group	Human (USA/Malawi/Venezuela)	TACGGAGGGGGCAAGCGTTATCCGGAATTATTGGGCGTAAAGGGTACGTAGGTGGCCTTTTAAGCGTAGGGTATAAGGCAATGGCTCAACCATTGTTCGC
ASV18190	833	1.81917	TRUE	TRUE	Venezuela (Rural)	d__Bacteria	Desulfobacterota	Desulfovibrionales	Desulfovibrionaceae	Desulfovibrio	Human (USA/Malawi/Venezuela)	TACGGAGGGTGCAAGCGTTAATCGGAATCACTGGGCGTAAAGCGCACGTAGGCTGTTATGTAAGTCAGGGGTGAAATCCCACGGCTCAACCGTGGAACTG
ASV18190	798	-0.250401	TRUE	TRUE	Malawi (Rural)	d__Bacteria	Desulfobacterota	Desulfovibrionales	Desulfovibrionaceae	Desulfovibrio	Human (USA/Malawi/Venezuela)	TACGGAGGGTGCAAGCGTTAATCGGAATCACTGGGCGTAAAGCGCACGTAGGCTGTTATGTAAGTCAGGGGTGAAATCCCACGGCTCAACCGTGGAACTG
ASV18306	624	-0.123664	TRUE	TRUE	Malawi (Rural)	d__Bacteria	Firmicutes	Clostridia_vadinBB60_group	Clostridia_vadinBB60_group	Clostridia_vadinBB60_group	Human (USA/Malawi/Venezuela)	TACGTAGGTGGCGAGCGTTGTCCGGAATGACTGGGCGTAAAGGGAGCGTAGGCGGCACAACAAGTTAGGAGTGAAATACCGTGGCTTAACCACGGAACTG
ASV18306	558	0.113095	TRUE	FALSE	Venezuela (Rural)	d__Bacteria	Firmicutes	Clostridia_vadinBB60_group	Clostridia_vadinBB60_group	Clostridia_vadinBB60_group	Human (USA/Malawi/Venezuela)	TACGTAGGTGGCGAGCGTTGTCCGGAATGACTGGGCGTAAAGGGAGCGTAGGCGGCACAACAAGTTAGGAGTGAAATACCGTGGCTTAACCACGGAACTG
ASV18332	641	-0.183665	TRUE	TRUE	Malawi (Rural)	d__Bacteria	Firmicutes	NA	NA	NA	Human (USA/Malawi/Venezuela)	TACGTAGGGGGCGAGCGTTGTCCGGAATTACTGGGCGTAAAGGGAGCGTAGGCGGCCAATTAAGTCAGATGTGAAATTCCCGGGCTTAACCTGGGCAGTG
ASV18332	519	0.112227	TRUE	FALSE	Venezuela (Rural)	d__Bacteria	Firmicutes	NA	NA	NA	Human (USA/Malawi/Venezuela)	TACGTAGGGGGCGAGCGTTGTCCGGAATTACTGGGCGTAAAGGGAGCGTAGGCGGCCAATTAAGTCAGATGTGAAATTCCCGGGCTTAACCTGGGCAGTG
ASV18351	797	1.34677	TRUE	TRUE	USA (Urban)	d__Bacteria	Firmicutes	Clostridia_vadinBB60_group	Clostridia_vadinBB60_group	Clostridia_vadinBB60_group	Human (USA/Malawi/Venezuela)	TACGTAGGTGGCAAGCGTTGTCCGGAATGACTGGGCGTAAAGGGTGCGTAGGTGGCCGCTCAAGTTAGTAGTGAAATTCCGAGGCTTAACCTCGGCGCTA
ASV18355	463	0.370051	TRUE	FALSE	Venezuela (Rural)	d__Bacteria	Firmicutes	Oscillospirales	Ruminococcaceae	Anaerotruncus	Human (USA/Malawi/Venezuela)	TACGTAGGGAGCGAGCGTTGTCCGGAATTACTGGGTGTAAAGGGAGCGTAGGCGGGAAGATAAGTTGGATGTTTAAACTATCGGCTCAACTGGTAATTGC
ASV18398	560	-0.53078	TRUE	FALSE	Malawi (Rural)	d__Bacteria	Firmicutes	Veillonellales-Selenomonadales	Veillonellaceae	Dialister	Human (USA/Malawi/Venezuela)	TACGTAGGTGGCAAGCGTTGTCCGGAATTATTGGGCGTAAAGCGCGCGCAGGCGGCTTCCCAAGTCCCTCTTAAAGTGCGGGGCTTAACCCCGTGATGGG
ASV18398	455	0.527212	TRUE	FALSE	Venezuela (Rural)	d__Bacteria	Firmicutes	Veillonellales-Selenomonadales	Veillonellaceae	Dialister	Human (USA/Malawi/Venezuela)	TACGTAGGTGGCAAGCGTTGTCCGGAATTATTGGGCGTAAAGCGCGCGCAGGCGGCTTCCCAAGTCCCTCTTAAAGTGCGGGGCTTAACCCCGTGATGGG
ASV18409	648	-2.16867	TRUE	TRUE	USA (Urban)	d__Bacteria	Firmicutes	Lachnospirales	Lachnospiraceae	Lachnospiraceae_NK4A136_group	Human (USA/Malawi/Venezuela)	TACGTAGGGGGCAAGCGTTATCCGGATTTACTGGGTGTAAAGGGAGCGTAGACGGCAAGGCAAGTCTGAAGTGAAAGCCCGGTGCTTAACGCCGGGACTG
ASV18409	789	2.11338	TRUE	TRUE	USA (Urban)	d__Bacteria	Firmicutes	Lachnospirales	Lachnospiraceae	Lachnospiraceae_NK4A136_group	Human (USA/Malawi/Venezuela)	TACGTAGGGGGCAAGCGTTATCCGGATTTACTGGGTGTAAAGGGAGCGTAGACGGCAAGGCAAGTCTGAAGTGAAAGCCCGGTGCTTAACGCCGGGACTG
ASV18418	793	0.8337	TRUE	TRUE	USA (Urban)	d__Bacteria	Firmicutes	Erysipelotrichales	Erysipelatoclostridiaceae	UCG-004	Human (USA/Malawi/Venezuela)	TACGTAGGTGGCAAGCGTTATCCGGAATTATTGGGCGTAAAGAGAGAGCAGGCGGTTATTCAAGTCTGAAGTGAAAAGCAGTGGCTTAACCATTGTAGGC
ASV18418	775	-1.256	TRUE	TRUE	USA (Urban)	d__Bacteria	Firmicutes	Erysipelotrichales	Erysipelatoclostridiaceae	UCG-004	Human (USA/Malawi/Venezuela)	TACGTAGGTGGCAAGCGTTATCCGGAATTATTGGGCGTAAAGAGAGAGCAGGCGGTTATTCAAGTCTGAAGTGAAAAGCAGTGGCTTAACCATTGTAGGC
ASV18472	654	-1.00604	TRUE	TRUE	Malawi (Rural)	d__Bacteria	Proteobacteria	Enterobacterales	Enterobacteriaceae	NA	Human (USA/Malawi/Venezuela)	TACGGAGGGTGCAAGCGTTAATCGGAATTACTGGGCGTAAAGCGCACGCAGGCGGTTTGTTAAGTCAGATGTGAAATCCCCGGGCTCAACCTGGGAACTG
ASV18472	721	2.93065	TRUE	TRUE	Venezuela (Rural)	d__Bacteria	Proteobacteria	Enterobacterales	Enterobacteriaceae	NA	Human (USA/Malawi/Venezuela)	TACGGAGGGTGCAAGCGTTAATCGGAATTACTGGGCGTAAAGCGCACGCAGGCGGTTTGTTAAGTCAGATGTGAAATCCCCGGGCTCAACCTGGGAACTG
ASV18494	544	-0.106542	TRUE	FALSE	Malawi (Rural)	d__Bacteria	Firmicutes	Peptostreptococcales-Tissierellales	Anaerovoracaceae	Mogibacterium	Human (USA/Malawi/Venezuela)	TACGTAGGGGGCAAGCGTTATCCGGAATTATTGGGCGTAAAGCGTGCGTAGGTGGTAATTTAAGCGCAAGGTTTAAACTAACGGCTCAACCGTTAATTGC
ASV18509	448	0.34838	TRUE	FALSE	Venezuela (Rural)	d__Bacteria	Firmicutes	Oscillospirales	Ruminococcaceae	NA	Human (USA/Malawi/Venezuela)	TACGTAGGTGGCAAGCGTTGTCCGGAATTACTGGGTGTAAAGGGAGCGTAGGCGGTATTGCAAGTTGAATGTGAAATCTATCGGCTCAACTGATAGGCTG
ASV18509	594	-0.209762	TRUE	FALSE	Malawi (Rural)	d__Bacteria	Firmicutes	Oscillospirales	Ruminococcaceae	NA	Human (USA/Malawi/Venezuela)	TACGTAGGTGGCAAGCGTTGTCCGGAATTACTGGGTGTAAAGGGAGCGTAGGCGGTATTGCAAGTTGAATGTGAAATCTATCGGCTCAACTGATAGGCTG
ASV18603	713	0.0551101	TRUE	TRUE	Venezuela (Rural)	d__Bacteria	Firmicutes	RF39	RF39	RF39	Human (USA/Malawi/Venezuela)	TACGTAGGGAGCGAGCGTTATCCGGATTTATTGGGTGTAAAGGGTGCGTAGGCGGTTTATTAGGTCTATGGTTTAATTCCGAAGCTTAACTTCGGTTCGC
ASV18603	751	0.13355	TRUE	TRUE	USA (Urban)	d__Bacteria	Firmicutes	RF39	RF39	RF39	Human (USA/Malawi/Venezuela)	TACGTAGGGAGCGAGCGTTATCCGGATTTATTGGGTGTAAAGGGTGCGTAGGCGGTTTATTAGGTCTATGGTTTAATTCCGAAGCTTAACTTCGGTTCGC
ASV18616	478	-0.115524	TRUE	FALSE	Malawi (Rural)	d__Bacteria	Firmicutes	Oscillospirales	Butyricicoccaceae	UCG-008	Human (USA/Malawi/Venezuela)	TACGTAGGGAGCAAGCGTTATCCGGATTTACTGGGTGTAAAGGGCGAGTAGGCGGGCTGGTAAGTTGGAAGTGAAATCTGGGGGCTCAACCCCCAAACTG
ASV18628	875	-4.34357	TRUE	TRUE	Malawi (Rural)	d__Bacteria	Proteobacteria	Aeromonadales	Succinivibrionaceae	Succinivibrio	Human (USA/Malawi/Venezuela)	TACGGAGGGTGCAAGCGTTAATCGGAATAACTGGGCGTAAAGGGCATGCAGGCGGTTCATCAAGTAGGATGTGAAATCCCCGGGCTCAACCTGGGAACAG
ASV18628	851	4.36746	TRUE	TRUE	Venezuela (Rural)	d__Bacteria	Proteobacteria	Aeromonadales	Succinivibrionaceae	Succinivibrio	Human (USA/Malawi/Venezuela)	TACGGAGGGTGCAAGCGTTAATCGGAATAACTGGGCGTAAAGGGCATGCAGGCGGTTCATCAAGTAGGATGTGAAATCCCCGGGCTCAACCTGGGAACAG
ASV18727	756	-0.0743876	TRUE	TRUE	USA (Urban)	d__Bacteria	Firmicutes	Oscillospirales	Oscillospiraceae	Flavonifractor	Human (USA/Malawi/Venezuela)	TACGTAGGTGGCAAGCGTTATCCGGATTTATTGGGTGTAAAGGGCGTGTAGGCGGGATTGCAAGTCAGATGTGAAAACTGGGGGCTCAACCTCCAGCCTG
ASV18727	795	0.0618675	TRUE	TRUE	USA (Urban)	d__Bacteria	Firmicutes	Oscillospirales	Oscillospiraceae	Flavonifractor	Human (USA/Malawi/Venezuela)	TACGTAGGTGGCAAGCGTTATCCGGATTTATTGGGTGTAAAGGGCGTGTAGGCGGGATTGCAAGTCAGATGTGAAAACTGGGGGCTCAACCTCCAGCCTG
ASV18745	566	-0.579809	TRUE	FALSE	Malawi (Rural)	d__Bacteria	Firmicutes	Clostridia_vadinBB60_group	Clostridia_vadinBB60_group	Clostridia_vadinBB60_group	Human (USA/Malawi/Venezuela)	TACGTAGGATGCAAGCGTTATCCGGAATGACTGGGCGTAAAGGGTGCGTAGGTGGTTTGCCAAGTTGGCAGCGTAATTCCGTGGCTTAACCGCGGAACTA
ASV18745	451	0.57036	TRUE	FALSE	Venezuela (Rural)	d__Bacteria	Firmicutes	Clostridia_vadinBB60_group	Clostridia_vadinBB60_group	Clostridia_vadinBB60_group	Human (USA/Malawi/Venezuela)	TACGTAGGATGCAAGCGTTATCCGGAATGACTGGGCGTAAAGGGTGCGTAGGTGGTTTGCCAAGTTGGCAGCGTAATTCCGTGGCTTAACCGCGGAACTA
ASV18769	801	1.49565	TRUE	TRUE	USA (Urban)	d__Bacteria	Firmicutes	Erysipelotrichales	Erysipelatoclostridiaceae	UCG-004	Human (USA/Malawi/Venezuela)	TACGTAGGTGGCAAGCGTTATCCGGAATTATTGGGCGTAAAGAGAGAGCAGGCGGTTATCTAAGTCTGAAGTGAAAAGCAGTGGCTTAACCATTGTAGGC
ASV1895	659	-0.799425	TRUE	TRUE	Malawi (Rural)	d__Bacteria	Firmicutes	Christensenellales	Christensenellaceae	Christensenella	Human (USA/Malawi/Venezuela)	TACGTAGGGAGCAAGCGTTGTCCGGAATTACTGGGCGTAAAGGGTGCGTAGGTGGTCATGTAAGTCAGATGTGAAAGACCGGGGCTTAACCCCGGGGTTG
ASV1895	494	0.372475	TRUE	FALSE	Venezuela (Rural)	d__Bacteria	Firmicutes	Christensenellales	Christensenellaceae	Christensenella	Human (USA/Malawi/Venezuela)	TACGTAGGGAGCAAGCGTTGTCCGGAATTACTGGGCGTAAAGGGTGCGTAGGTGGTCATGTAAGTCAGATGTGAAAGACCGGGGCTTAACCCCGGGGTTG
ASV18956	451	0.338644	TRUE	FALSE	Venezuela (Rural)	d__Bacteria	Firmicutes	Oscillospirales	Butyricicoccaceae	NA	Human (USA/Malawi/Venezuela)	TACGTAGGGAGCAAGCGTTATCCGGATTTACTGGGTGTAAAGGGCGAGTAGGCGGGCTGGCAAGTTGGGAGTGAAATCCGGGGGCTTAACCCCCGAACTG
ASV19078	454	0.0764306	TRUE	FALSE	Venezuela (Rural)	d__Bacteria	Firmicutes	Izemoplasmatales	Izemoplasmatales	Izemoplasmatales	Human (USA/Malawi/Venezuela)	TACATAGGGGGCAAGCGTTATCCGGAATTATTGGGCGTAAAGCGTGCGTAGGCGGCCACTTAAGTCTGTCGTGAAAGCCCACAGCTTAACTGTGGAGGGT
ASV19078	549	-0.0860728	TRUE	FALSE	Malawi (Rural)	d__Bacteria	Firmicutes	Izemoplasmatales	Izemoplasmatales	Izemoplasmatales	Human (USA/Malawi/Venezuela)	TACATAGGGGGCAAGCGTTATCCGGAATTATTGGGCGTAAAGCGTGCGTAGGCGGCCACTTAAGTCTGTCGTGAAAGCCCACAGCTTAACTGTGGAGGGT
ASV19120	694	-0.995989	TRUE	TRUE	Malawi (Rural)	d__Bacteria	Firmicutes	Christensenellales	Christensenellaceae	Christensenellaceae_R-7_group	Human (USA/Malawi/Venezuela)	TACGTAGGGGGCGAGCGTTGTCCGGAATTACTGGGCGTAAAGGGCGCGTAGGCGGCATAATAAGTCTGTTGTGAAAATCCAGCGCTTAACGTTGGACGTG
ASV19120	596	0.752413	TRUE	FALSE	Venezuela (Rural)	d__Bacteria	Firmicutes	Christensenellales	Christensenellaceae	Christensenellaceae_R-7_group	Human (USA/Malawi/Venezuela)	TACGTAGGGGGCGAGCGTTGTCCGGAATTACTGGGCGTAAAGGGCGCGTAGGCGGCATAATAAGTCTGTTGTGAAAATCCAGCGCTTAACGTTGGACGTG
ASV19181	447	0.515088	TRUE	FALSE	USA (Urban)	d__Bacteria	Firmicutes	Oscillospirales	Oscillospiraceae	uncultured	Human (USA/Malawi/Venezuela)	TACGTAGGGAGCAAGCGTTATCCGGATTTACTGGGTGTAAAGGGCGTGTAGGCGGGAGTGCAAGTCAGATGTGAAAACTATGGGCTCAACCCATAGCCTG
ASV19183	464	0.511041	TRUE	FALSE	Venezuela (Rural)	d__Bacteria	Firmicutes	NA	NA	NA	Human (USA/Malawi/Venezuela)	TACGTAGGTGGCAAGCGTTGTCCGGAATTACTGGGTGTAAAGGGCGTGTAGGCGGGACTTTAAGTCAGATGTGAAATACCCGGGCTTAACTCGGGAGGGG
ASV19183	574	-0.516342	TRUE	FALSE	Malawi (Rural)	d__Bacteria	Firmicutes	NA	NA	NA	Human (USA/Malawi/Venezuela)	TACGTAGGTGGCAAGCGTTGTCCGGAATTACTGGGTGTAAAGGGCGTGTAGGCGGGACTTTAAGTCAGATGTGAAATACCCGGGCTTAACTCGGGAGGGG
ASV19221	771	-0.850482	TRUE	TRUE	USA (Urban)	d__Bacteria	Firmicutes	Oscillospirales	Ruminococcaceae	NA	Human (USA/Malawi/Venezuela)	TACGTAGGTGGCAAGCGTTGTCCGGAATTACTGGGTGTAAAGGGAGCGTAGGCGGGAATACAAGTTGAATGTGAAAACTATGGGCTCAACCCATAGTTGC
ASV19277	787	0.495423	TRUE	TRUE	Venezuela (Rural)	d__Bacteria	Firmicutes	Christensenellales	Christensenellaceae	uncultured	Human (USA/Malawi/Venezuela)	TACGTAGGGAGCGAGCGTTGTCCGGAATTACTGGGCGTAAAGGGTGCGTAGGCGGCCTGGTAAGTCAGATGTGAAATACCCGTGCTCAACATGGGGGGTG
ASV19277	821	-0.53508	TRUE	TRUE	Malawi (Rural)	d__Bacteria	Firmicutes	Christensenellales	Christensenellaceae	uncultured	Human (USA/Malawi/Venezuela)	TACGTAGGGAGCGAGCGTTGTCCGGAATTACTGGGCGTAAAGGGTGCGTAGGCGGCCTGGTAAGTCAGATGTGAAATACCCGTGCTCAACATGGGGGGTG
ASV19288	534	-0.369439	TRUE	FALSE	Malawi (Rural)	d__Bacteria	Firmicutes	Oscillospirales	Oscillospiraceae	Colidextribacter	Human (USA/Malawi/Venezuela)	TACGTAGGTGGCAAGCGTTATCCGGATTTACTGGGTGTAAAGGGCGTGTAGGCGGGAAAGCAAGTCAGGCGTGAAAACTGGAGGCTCAACCTCCAGCCTG
ASV19288	437	0.264504	TRUE	FALSE	Venezuela (Rural)	d__Bacteria	Firmicutes	Oscillospirales	Oscillospiraceae	Colidextribacter	Human (USA/Malawi/Venezuela)	TACGTAGGTGGCAAGCGTTATCCGGATTTACTGGGTGTAAAGGGCGTGTAGGCGGGAAAGCAAGTCAGGCGTGAAAACTGGAGGCTCAACCTCCAGCCTG
ASV19302	527	-0.679539	TRUE	FALSE	Malawi (Rural)	d__Bacteria	Firmicutes	Oscillospirales	Ruminococcaceae	Anaerotruncus	Human (USA/Malawi/Venezuela)	TACGTAGGGTGCGAGCGTTGTCCGGAATTACTGGGTGTAAAGGGAGCGTAGGCGGGGGTTCAAGCCCTATGTTAAATCCATCGGCTCAACCGGTGGCTGC
ASV19340	528	-0.255311	TRUE	FALSE	Malawi (Rural)	d__Bacteria	Firmicutes	Oscillospirales	Oscillospiraceae	UCG-005	Human (USA/Malawi/Venezuela)	TACGTAGGGAGCAAGCGTTGTCCGGATTTACTGGGTGTAAAGGGCGTGTAGGCGGAGATGCAAGTCAGATGTGAAATCTGGGGGCTCAACCCCCAAACTG
ASV19565	480	0.198052	TRUE	FALSE	Venezuela (Rural)	d__Bacteria	Firmicutes	Erysipelotrichales	Erysipelatoclostridiaceae	Candidatus_Stoquefichus	Human (USA/Malawi/Venezuela)	TACGTAGGTGGCGAGCGTTATCCGGAATCATTGGGCGTAAAGAGGGAGCAGGCGGCAGTGCAGGTCTGCGGTGAAAGCCCGAAGCTAAACTTCGGTAAGC
ASV19565	582	-0.204997	TRUE	FALSE	Malawi (Rural)	d__Bacteria	Firmicutes	Erysipelotrichales	Erysipelatoclostridiaceae	Candidatus_Stoquefichus	Human (USA/Malawi/Venezuela)	TACGTAGGTGGCGAGCGTTATCCGGAATCATTGGGCGTAAAGAGGGAGCAGGCGGCAGTGCAGGTCTGCGGTGAAAGCCCGAAGCTAAACTTCGGTAAGC
ASV19587	812	-0.28302	TRUE	TRUE	Malawi (Rural)	d__Bacteria	Firmicutes	Oscillospirales	Oscillospiraceae	UCG-005	Human (USA/Malawi/Venezuela)	TACGTAGGTTGCAAGCGTTGTCCGGATTTACTGGGTGTAAAGGGCGTGTAGGCGGAGATGCAAGTTAGGAGTGAAATCTATGGGCTTAACCCATAAACTG
ASV19643	813	0.57932	TRUE	TRUE	Venezuela (Rural)	d__Bacteria	Firmicutes	Oscillospirales	UCG-010	UCG-010	Human (USA/Malawi/Venezuela)	TACGTAGGTGGCGAGCGTTATCCGGAATTACTGGGTGTAAAGGGTGTGTAGGCGGGGAGGCAAGTCAGATGTGAAAACCAAAGGCTCAACCTTTGGCTTG
ASV19682	753	-0.325608	TRUE	TRUE	Malawi (Rural)	d__Bacteria	Bacteroidota	Bacteroidales	Muribaculaceae	Muribaculaceae	Human (USA/Malawi/Venezuela)	TACGGAGGATGCGAGCGTTATCCGGATTTATTGGGTTTAAAGGGAGCGCAGGCTGCGAGGCAAGTCAGCGGTCAAATGTCGGGGCTCAACCCCGGCCTGC
ASV19682	803	0.723515	TRUE	TRUE	Venezuela (Rural)	d__Bacteria	Bacteroidota	Bacteroidales	Muribaculaceae	Muribaculaceae	Human (USA/Malawi/Venezuela)	TACGGAGGATGCGAGCGTTATCCGGATTTATTGGGTTTAAAGGGAGCGCAGGCTGCGAGGCAAGTCAGCGGTCAAATGTCGGGGCTCAACCCCGGCCTGC
ASV19688	664	-1.58399	TRUE	TRUE	USA (Urban)	d__Bacteria	Firmicutes	Oscillospirales	Ruminococcaceae	[Eubacterium]_siraeum_group	Human (USA/Malawi/Venezuela)	TACGTAGGTGGCAAGCGTTGTCCGGAATTACTGGGTGTAAAGGGAGTGTAGGCGGGATATCAAGTCAGAAGTGAAAATTACGGGCTCAACTCGTAACCTG
ASV19688	646	1.28508	TRUE	TRUE	USA (Urban)	d__Bacteria	Firmicutes	Oscillospirales	Ruminococcaceae	[Eubacterium]_siraeum_group	Human (USA/Malawi/Venezuela)	TACGTAGGTGGCAAGCGTTGTCCGGAATTACTGGGTGTAAAGGGAGTGTAGGCGGGATATCAAGTCAGAAGTGAAAATTACGGGCTCAACTCGTAACCTG
ASV19864	492	0.313934	TRUE	FALSE	Venezuela (Rural)	d__Bacteria	Firmicutes	Oscillospirales	Ruminococcaceae	NA	Human (USA/Malawi/Venezuela)	TACGTAGGGAGCGAGCGTTGTCCGGAATTACTGGGTGTAAAGGGAGCGTAGGCGGGGAGACAAGTTGGGTGTCAAATCTATCGGCTTAACCGATAGCCGC
ASV19871	512	-0.347981	TRUE	FALSE	Malawi (Rural)	d__Bacteria	Firmicutes	Lachnospirales	Defluviitaleaceae	Defluviitaleaceae_UCG-011	Human (USA/Malawi/Venezuela)	TACGTAGGGGGCGAGCGTTATCCGGAATTACTGGGTGTAAAGGGTGCGTAGGCGGCATCGTAAGTCTGTTGTGAAAGGCGATGGCTTAACCATCGAAGTG
ASV20031	800	1.85731	TRUE	TRUE	USA (Urban)	d__Bacteria	Actinobacteriota	Coriobacteriales	Coriobacteriaceae	Collinsella	Human (USA/Malawi/Venezuela)	TACGTAGGGGGCGAGCGTTATCCGGATTCATTGGGCGTAAAGCGCGCGTAGGCGGCCCGGCAGGCCGGGGGTCGAAGCGGGGGGCTCAACCCCCCCAAGC
ASV20031	776	-1.97199	TRUE	TRUE	USA (Urban)	d__Bacteria	Actinobacteriota	Coriobacteriales	Coriobacteriaceae	Collinsella	Human (USA/Malawi/Venezuela)	TACGTAGGGGGCGAGCGTTATCCGGATTCATTGGGCGTAAAGCGCGCGTAGGCGGCCCGGCAGGCCGGGGGTCGAAGCGGGGGGCTCAACCCCCCCAAGC
ASV20191	764	0.0399514	TRUE	TRUE	USA (Urban)	d__Bacteria	Firmicutes	Oscillospirales	Ruminococcaceae	Subdoligranulum	Human (USA/Malawi/Venezuela)	AACGTAGGGTGCAAGCGTTGTCCGGAATTACTGGGTGTAAAGGGAGCGCAGGCGGACCGGCAAGTTGGAAGTGAAAACCATGGGCTCAACCCGTGAATTG
ASV20191	746	0.541215	TRUE	TRUE	Venezuela (Rural)	d__Bacteria	Firmicutes	Oscillospirales	Ruminococcaceae	Subdoligranulum	Human (USA/Malawi/Venezuela)	AACGTAGGGTGCAAGCGTTGTCCGGAATTACTGGGTGTAAAGGGAGCGCAGGCGGACCGGCAAGTTGGAAGTGAAAACCATGGGCTCAACCCGTGAATTG
ASV20236	811	-0.390955	TRUE	TRUE	Malawi (Rural)	d__Bacteria	Elusimicrobiota	Elusimicrobiales	Elusimicrobiaceae	Elusimicrobium	Human (USA/Malawi/Venezuela)	GACGTAGGTGGCAAGCGTTACTCGGAATTACTAGGCGTAAAGCGCGCGTAGGCGGAATGTTAAGTCTGTTGTGTAATCTCTGGGCTCAACCCAGAAACTG
ASV20386	460	0.142706	TRUE	FALSE	USA (Urban)	d__Bacteria	Firmicutes	NA	NA	NA	Human (USA/Malawi/Venezuela)	TACGTAGGTGGCAAGCGTTGTCCGGATTTACTGGGTGTAAAGGGCGTGTAGGCGGGTCAGCAAGTCAGATGTGAAATGCCGGGGCTTAACTCCGGAACTG
ASV20506	437	-0.765274	TRUE	FALSE	USA (Urban)	d__Bacteria	Firmicutes	Lachnospirales	Lachnospiraceae	[Eubacterium]_xylanophilum_group	Human (USA/Malawi/Venezuela)	TACGTAGGGGGCAAGCGTTATCCGGATTTACTGGGTGTAAAGGGTGCGTAGGTGGCAAGGCAAGTCAGATGTGAAAGCCCGGGGCTCAACCCCGGTACTG
ASV20521	755	-1.70685	TRUE	TRUE	USA (Urban)	d__Bacteria	Actinobacteriota	Bifidobacteriales	Bifidobacteriaceae	Bifidobacterium	Human (USA/Malawi/Venezuela)	TACGTAGGGTGCAAGCGTTATCCGGAATTATTGGGCGTAAAGGGCTCGTAGGCGGTTCGTCGCGTCCGGTGTGAAAGTCCATCGCTTAACGGTGGATCCG
ASV20521	760	2.40163	TRUE	TRUE	USA (Urban)	d__Bacteria	Actinobacteriota	Bifidobacteriales	Bifidobacteriaceae	Bifidobacterium	Human (USA/Malawi/Venezuela)	TACGTAGGGTGCAAGCGTTATCCGGAATTATTGGGCGTAAAGGGCTCGTAGGCGGTTCGTCGCGTCCGGTGTGAAAGTCCATCGCTTAACGGTGGATCCG
ASV20586	747	-0.156516	TRUE	TRUE	USA (Urban)	d__Bacteria	Proteobacteria	Burkholderiales	Oxalobacteraceae	Oxalobacter	Human (USA/Malawi/Venezuela)	TACGTAGGGTGCGAGCGTTAATCGGAATTACTGGGCGTAAAGCGTGCGCAGGCGGTTGTGTAAGACAGATGTGAAATGCCCGGGCTTAACCTGGGAATTG
ASV20586	761	0.440219	TRUE	TRUE	USA (Urban)	d__Bacteria	Proteobacteria	Burkholderiales	Oxalobacteraceae	Oxalobacter	Human (USA/Malawi/Venezuela)	TACGTAGGGTGCGAGCGTTAATCGGAATTACTGGGCGTAAAGCGTGCGCAGGCGGTTGTGTAAGACAGATGTGAAATGCCCGGGCTTAACCTGGGAATTG
ASV20713	478	-0.0180997	TRUE	FALSE	Malawi (Rural)	d__Bacteria	Proteobacteria	Rhodospirillales	uncultured	uncultured	Human (USA/Malawi/Venezuela)	TACGAAGGGGGCAAGCGTTGTTCGGAATTACTGGGCGTAAAGGGAGTGTAGGCGGTTATGTAAGATAGTGGTGAAATCCCAGAGCTTAACTTTGGAATTG
ASV20715	815	0.782408	TRUE	TRUE	Venezuela (Rural)	d__Bacteria	Firmicutes	Oscillospirales	Oscillospiraceae	NA	Human (USA/Malawi/Venezuela)	TACGTAGGGAGCAAGCGTTATCCGGATTTACTGGGTGTAAAGGGCGTGTAGGCGGGACTGCAAGTCAGATGTGAAAACTATGGGCTCAACTCATAGCCTG
ASV20715	806	-0.3197	TRUE	TRUE	Malawi (Rural)	d__Bacteria	Firmicutes	Oscillospirales	Oscillospiraceae	NA	Human (USA/Malawi/Venezuela)	TACGTAGGGAGCAAGCGTTATCCGGATTTACTGGGTGTAAAGGGCGTGTAGGCGGGACTGCAAGTCAGATGTGAAAACTATGGGCTCAACTCATAGCCTG
ASV20895	514	-0.335995	TRUE	FALSE	Malawi (Rural)	d__Bacteria	Firmicutes	Clostridia_vadinBB60_group	Clostridia_vadinBB60_group	Clostridia_vadinBB60_group	Human (USA/Malawi/Venezuela)	TACATAGGGGGCGAGCGTTGTCCGGAATGACTGGGCGTAAAGGGAGTGTAGGTGGCTGAGTAAGTTATGAGTGAAAGCCCGCGGCTTAACTGCGGAACTG
ASV209	480	0.23473	TRUE	FALSE	USA (Urban)	d__Bacteria	Firmicutes	Oscillospirales	Ruminococcaceae	NA	Human (USA/Malawi/Venezuela)	TACGTAGGGAGCAAGCGTTGTCCGGATTTACTGGGTGTAAAGGGTGCGTAGGCGGAAGAGCAAGTCAGTAGTGAAATCTGGGGGCTTAACCCCCAAACTG
ASV20946	499	-0.364586	TRUE	FALSE	Malawi (Rural)	d__Bacteria	Firmicutes	Peptostreptococcales-Tissierellales	Anaerovoracaceae	[Eubacterium]_nodatum_group	Human (USA/Malawi/Venezuela)	TACGTAGGGGGCAAGCGTTATCCGGAATTATTGGGCGTAAAGAGTGCGTAGGTGGTTACCTAAGCGCAGGGTATAAGGCAATGGCTCAACCATTGTTGGC
ASV21069	759	0.33127	TRUE	TRUE	USA (Urban)	d__Bacteria	Firmicutes	Lachnospirales	Lachnospiraceae	[Eubacterium]_xylanophilum_group	Human (USA/Malawi/Venezuela)	TACGTAGGGGGCAAGCGTTATCCGGATTTACTGGGTGTAAAGGGTGCGTAGGTGGCAAGGCAAGTCAGATGTGAAAGCCCGGGGCTCAACCCCGGTATTG
ASV21108	527	-0.793961	TRUE	FALSE	Malawi (Rural)	d__Bacteria	Firmicutes	Lachnospirales	Lachnospiraceae	Lachnospiraceae	Human (USA/Malawi/Venezuela)	TACGTAGGGGGCAAGCGTTATCCGGATTTACTGGGTGTAAAGGGAGCGTAGGCGGTAGCGCAAGTCAGAAGTGAAAGCCCGGGGCTCAACCCCGCGGACT
ASV21151	678	0.742145	TRUE	TRUE	USA (Urban)	d__Bacteria	Firmicutes	Oscillospirales	Oscillospiraceae	UCG-005	Human (USA/Malawi/Venezuela)	TACGTAGGTGGCAAGCGTTGTCCGGATTTACTGGGTGTAAAGGGCGTGTAGGCGGAGATGCAAGTCAGATGTGAAATCCCCGGGCTTAACCCGGGAACTG
ASV21157	432	0.621685	TRUE	FALSE	Venezuela (Rural)	d__Bacteria	Firmicutes	Oscillospirales	Oscillospiraceae	Papillibacter	Human (USA/Malawi/Venezuela)	TACGTAGGTGGCGAGCGTTGTCCGGAATTACTGGGTGTAAAGGGTGCGTAGGCGGGACGGTAAGTCAGCTGTGAAAGGTACAGGCTCAACCTGTGCACTG
ASV21157	526	-0.629825	TRUE	FALSE	Malawi (Rural)	d__Bacteria	Firmicutes	Oscillospirales	Oscillospiraceae	Papillibacter	Human (USA/Malawi/Venezuela)	TACGTAGGTGGCGAGCGTTGTCCGGAATTACTGGGTGTAAAGGGTGCGTAGGCGGGACGGTAAGTCAGCTGTGAAAGGTACAGGCTCAACCTGTGCACTG
ASV21188	708	0.738046	TRUE	TRUE	Venezuela (Rural)	d__Bacteria	Proteobacteria	Burkholderiales	NA	NA	Human (USA/Malawi/Venezuela)	TACGTAGGGTGCGAGCGTTAATCGGAATTACTGGGCGTAAAGCGTGCGCAGGCGGTTGGGTAAGACAGATGTGAAATCCCCGGGCTTAACCTGGGAACTG
ASV21188	735	-0.461097	TRUE	TRUE	Malawi (Rural)	d__Bacteria	Proteobacteria	Burkholderiales	NA	NA	Human (USA/Malawi/Venezuela)	TACGTAGGGTGCGAGCGTTAATCGGAATTACTGGGCGTAAAGCGTGCGCAGGCGGTTGGGTAAGACAGATGTGAAATCCCCGGGCTTAACCTGGGAACTG
ASV21226	812	0.380424	TRUE	TRUE	Venezuela (Rural)	d__Bacteria	Bacteroidota	Bacteroidales	Prevotellaceae	Prevotellaceae_UCG-003	Human (USA/Malawi/Venezuela)	TACGGAAGATGCGAGCGTTATCCGGATTTATTGGGTTTAAAGGGAGCGTAGGCGGGCTGTTAAGTCAGCGGTCAAATGTCAGGGCCCAACCTTGGCATGC
ASV21312	760	-0.244034	TRUE	TRUE	USA (Urban)	d__Bacteria	Firmicutes	Oscillospirales	[Eubacterium]_coprostanoligenes_group	[Eubacterium]_coprostanoligenes_group	Human (USA/Malawi/Venezuela)	TACGTAGGTGGCAAGCGTTGTCCGGATTTACTGGGTATAAAGGGAGCGCAGGCGGGAGAGCAAGTCAGCGGTGAAATACATGGGCTTAACCCATGAACTG
ASV21312	781	0.44886	TRUE	TRUE	USA (Urban)	d__Bacteria	Firmicutes	Oscillospirales	[Eubacterium]_coprostanoligenes_group	[Eubacterium]_coprostanoligenes_group	Human (USA/Malawi/Venezuela)	TACGTAGGTGGCAAGCGTTGTCCGGATTTACTGGGTATAAAGGGAGCGCAGGCGGGAGAGCAAGTCAGCGGTGAAATACATGGGCTTAACCCATGAACTG
ASV2136	745	-0.585813	TRUE	TRUE	USA (Urban)	d__Bacteria	Verrucomicrobiota	Victivallales	Victivallaceae	Victivallis	Human (USA/Malawi/Venezuela)	TACGTAGGTGGCGAGCGTTGTTCGGATTTATTGGGCGTAAAGGGTCTGTAGGAGGTTCGTTAAATACGAGGTGAAATCCCGAAGCTCAACTTCGGAACTG
ASV2136	514	0.094599	TRUE	FALSE	USA (Urban)	d__Bacteria	Verrucomicrobiota	Victivallales	Victivallaceae	Victivallis	Human (USA/Malawi/Venezuela)	TACGTAGGTGGCGAGCGTTGTTCGGATTTATTGGGCGTAAAGGGTCTGTAGGAGGTTCGTTAAATACGAGGTGAAATCCCGAAGCTCAACTTCGGAACTG
ASV21401	625	1.35017	TRUE	TRUE	USA (Urban)	d__Bacteria	Firmicutes	Peptostreptococcales-Tissierellales	Anaerovoracaceae	Family_XIII_AD3011_group	Human (USA/Malawi/Venezuela)	TACGTAGGGGGCAAGCGTTATCCGGAATTATTGGGCGTAAAGAGTACGTAGGTGGTTTTCTAAGCACGGGGTTTAAGGCAATGGCTTAACCATTGTTCGC
ASV2147	467	0.301955	TRUE	FALSE	USA (Urban)	d__Bacteria	Firmicutes	Clostridiales	Clostridiaceae	Clostridium_sensu_stricto_1	Human (USA/Malawi/Venezuela)	TACGTAGGTGGCAAGCGTTGTCCGGATTTACTGGGCGTAAAGGGAGCGTAGGCGGACTTTTAAGTGAGATGTGAAATACCCGGGCTCAACTTGGGTGCTG
ASV21553	743	-0.728823	TRUE	TRUE	USA (Urban)	d__Bacteria	Actinobacteriota	Coriobacteriales	Coriobacteriaceae	Collinsella	Human (USA/Malawi/Venezuela)	TACGTAGGGGGCGAGCGTTATCCGGATTCATTGGGCGTAAAGCGCGCGTAGGCGGCCCGGCAGGCCGGGGGGCGAAGCGGGGGGCTCAACCCCCCCAAGC
ASV21624	808	1.56774	TRUE	TRUE	USA (Urban)	d__Bacteria	Firmicutes	Oscillospirales	Ruminococcaceae	NA	Human (USA/Malawi/Venezuela)	TACGTAGGGAGCGAGCGTTGTCCGGATTTACTGGGTGTAAAGGGTGCGTAGGCGGGTCTGCAAGTCAGGCGTGAAATCCCGCGGCTCAACTGCGGGGCTG
ASV21695	440	0.350742	TRUE	FALSE	Venezuela (Rural)	d__Bacteria	Actinobacteriota	Bifidobacteriales	Bifidobacteriaceae	Bifidobacterium	Human (USA/Malawi/Venezuela)	TACGTAGGGTGCAAGCGTTATCCGGAATTATTGGGCGTAAAGGGCTCGTAGGCGGTTCGTCGCGTCCGGTGTGAAAGTCCATCGCTTAACGGTGGGTCCC
ASV21695	572	-0.277156	TRUE	FALSE	Malawi (Rural)	d__Bacteria	Actinobacteriota	Bifidobacteriales	Bifidobacteriaceae	Bifidobacterium	Human (USA/Malawi/Venezuela)	TACGTAGGGTGCAAGCGTTATCCGGAATTATTGGGCGTAAAGGGCTCGTAGGCGGTTCGTCGCGTCCGGTGTGAAAGTCCATCGCTTAACGGTGGGTCCC
ASV2170	781	0.699459	TRUE	TRUE	Venezuela (Rural)	d__Bacteria	Firmicutes	Oscillospirales	[Eubacterium]_coprostanoligenes_group	[Eubacterium]_coprostanoligenes_group	Human (USA/Malawi/Venezuela)	TACGTAGGGGGCAAGCGTTGTCCGGAATTACTGGGTGTAAAGGGAGCGCAGGCGGAGAAGCAAGTCAGTGGTGAAAACGATGGGCTTAACTCATCGACTG
ASV2170	817	-0.717041	TRUE	TRUE	Malawi (Rural)	d__Bacteria	Firmicutes	Oscillospirales	[Eubacterium]_coprostanoligenes_group	[Eubacterium]_coprostanoligenes_group	Human (USA/Malawi/Venezuela)	TACGTAGGGGGCAAGCGTTGTCCGGAATTACTGGGTGTAAAGGGAGCGCAGGCGGAGAAGCAAGTCAGTGGTGAAAACGATGGGCTTAACTCATCGACTG
ASV21702	503	0.354142	TRUE	FALSE	USA (Urban)	d__Bacteria	Firmicutes	Oscillospirales	Ruminococcaceae	Faecalibacterium	Human (USA/Malawi/Venezuela)	AACGTAGGTCACAAGCGTTGTCCGGAATTACTGGGTGTAAAGGGAGCGCAGGCGGGAAGACAAGTTGGAAGTGAAATCTATGGGCTCAACCCATAAACTG
ASV21702	644	-0.961435	TRUE	TRUE	USA (Urban)	d__Bacteria	Firmicutes	Oscillospirales	Ruminococcaceae	Faecalibacterium	Human (USA/Malawi/Venezuela)	AACGTAGGTCACAAGCGTTGTCCGGAATTACTGGGTGTAAAGGGAGCGCAGGCGGGAAGACAAGTTGGAAGTGAAATCTATGGGCTCAACCCATAAACTG
ASV2171	476	-0.219839	TRUE	FALSE	Malawi (Rural)	d__Bacteria	Firmicutes	Erysipelotrichales	Erysipelotrichaceae	Faecalitalea	Human (USA/Malawi/Venezuela)	TACGTAGGTGGCAAGCGTTATCCGGAATGATTGGGCGTAAAGGGTGCGTAGGTGGTACATTAAGTCTGAAGTAAAAGGCAGCAGCTCAACTGCTGTTCGC
ASV21731	438	0.638645	TRUE	FALSE	Venezuela (Rural)	d__Bacteria	Firmicutes	M55-D21	M55-D21	M55-D21	Human (USA/Malawi/Venezuela)	TACGTAGGGGGCGAGCGTTGTCCGGAATTATTGGGCGTAAAGGGTGCGTAGGCGGCGAAGCAAGTCAGATGTGAAAGACCACGGCTTAACTGTGGGGGTG
ASV21731	530	-0.750782	TRUE	FALSE	Malawi (Rural)	d__Bacteria	Firmicutes	M55-D21	M55-D21	M55-D21	Human (USA/Malawi/Venezuela)	TACGTAGGGGGCGAGCGTTGTCCGGAATTATTGGGCGTAAAGGGTGCGTAGGCGGCGAAGCAAGTCAGATGTGAAAGACCACGGCTTAACTGTGGGGGTG
ASV21737	803	1.0638	TRUE	TRUE	USA (Urban)	d__Bacteria	Firmicutes	Lachnospirales	Lachnospiraceae	Lachnospiraceae_UCG-010	Human (USA/Malawi/Venezuela)	TACGTAGGGGGCAAGCGTTATCCGGAATTACTGGGTGTAAAGGGAGAGTAGGCGGCGAAGTAAGTAAGATGTGAAAGCCCTCGGCTTAACTGAGGGATTG
ASV21737	778	-1.66517	TRUE	TRUE	USA (Urban)	d__Bacteria	Firmicutes	Lachnospirales	Lachnospiraceae	Lachnospiraceae_UCG-010	Human (USA/Malawi/Venezuela)	TACGTAGGGGGCAAGCGTTATCCGGAATTACTGGGTGTAAAGGGAGAGTAGGCGGCGAAGTAAGTAAGATGTGAAAGCCCTCGGCTTAACTGAGGGATTG
ASV21741	780	-0.559273	TRUE	TRUE	Malawi (Rural)	d__Bacteria	Firmicutes	Oscillospirales	Ruminococcaceae	Ruminococcus	Human (USA/Malawi/Venezuela)	TACGTAGGGAGCGAGCGTTGTCCGGAATTACTGGGTGTAAAGGGAGCGTAGGCGGGATCTTAAGTCAGGTGTGAAAACTATGGGCTCAACCCATAGACTG
ASV21842	789	0.338503	TRUE	TRUE	USA (Urban)	d__Bacteria	Firmicutes	Clostridia_UCG-014	Clostridia_UCG-014	Clostridia_UCG-014	Human (USA/Malawi/Venezuela)	TACGTAGGGAGCGAGCGTTATCCGGATTTATTGGGTGTAAAGGGTGCGTAGACGGGAAATTAAGTTAGTTGTGAAATCCCACGGCTCAACTGTGGAACTG
ASV21910	667	-0.493876	TRUE	TRUE	Malawi (Rural)	d__Bacteria	Firmicutes	Oscillospirales	Ruminococcaceae	uncultured	Human (USA/Malawi/Venezuela)	TACGTAGGTGGCAAGCGTTGTCCGGAATTACTGGGTGTAAAGGGAGCGTAGGCGGGAAGATAAGTTGGACGTTTAATCTATCGGCTCAACCGATATCAGC
ASV21910	578	0.364942	TRUE	FALSE	Venezuela (Rural)	d__Bacteria	Firmicutes	Oscillospirales	Ruminococcaceae	uncultured	Human (USA/Malawi/Venezuela)	TACGTAGGTGGCAAGCGTTGTCCGGAATTACTGGGTGTAAAGGGAGCGTAGGCGGGAAGATAAGTTGGACGTTTAATCTATCGGCTCAACCGATATCAGC
ASV22049	544	-0.413217	TRUE	FALSE	Malawi (Rural)	d__Bacteria	Firmicutes	Peptostreptococcales-Tissierellales	Anaerovoracaceae	uncultured	Human (USA/Malawi/Venezuela)	TACGTAGGGGGCAAGCGTTATCCGGAATTATTGGGCGTAAAGGGTACGTAGGCGGTTTAATAAGCGTGAGGTGAAAGGCAATGGCTTAACTATTGTAAGC
ASV2214	587	0.635819	TRUE	FALSE	Venezuela (Rural)	d__Bacteria	Firmicutes	Oscillospirales	[Eubacterium]_coprostanoligenes_group	[Eubacterium]_coprostanoligenes_group	Human (USA/Malawi/Venezuela)	TACGTAGGTGGCAAGCGTTGTCCGGAATTACTGGGTGTAAAGGGAGCGTAGGCGGGAAGGCAAGTCAGATGTGAAATCCACAGGCTTAACCTGTGGCGTG
ASV2214	622	-0.391147	TRUE	TRUE	Malawi (Rural)	d__Bacteria	Firmicutes	Oscillospirales	[Eubacterium]_coprostanoligenes_group	[Eubacterium]_coprostanoligenes_group	Human (USA/Malawi/Venezuela)	TACGTAGGTGGCAAGCGTTGTCCGGAATTACTGGGTGTAAAGGGAGCGTAGGCGGGAAGGCAAGTCAGATGTGAAATCCACAGGCTTAACCTGTGGCGTG
ASV22145	512	-0.812801	TRUE	FALSE	Malawi (Rural)	d__Bacteria	Verrucomicrobiota	Verrucomicrobiales	Akkermansiaceae	Akkermansia	Human (USA/Malawi/Venezuela)	TACAGAGGTCTCAAGCGTTGTTCGGAATCACTGGGCGTAAAGCGTGCGTAGGCTGTTTCGTAAGTCGTGTGTGAAAGGCGCGGGCTCAACCTGCGGACGG
ASV22248	532	-1.14667	TRUE	FALSE	Malawi (Rural)	d__Bacteria	Actinobacteriota	Corynebacteriales	Corynebacteriaceae	Corynebacterium	Human (USA/Malawi/Venezuela)	TACGTAGGGTGCGAGCGTTGTCCGGAATTACTGGGCGTAAAGAGCTCGTAGGTGGTCTGTCGCGTCATTTGTGAAAGCCCGGGGCTTAACTCCGGGTTGG
ASV22254	639	-0.648918	TRUE	TRUE	Malawi (Rural)	d__Bacteria	Firmicutes	Oscillospirales	Ruminococcaceae	NA	Human (USA/Malawi/Venezuela)	TACGTAGGGAGCGAGCGTTGTCCGGAATTACTGGGTGTAAAGGGAGCGTAGGCGGGATGGCAAGTAGAATGTGAAAACAGCCGGCTCAACTGGTTGTTGC
ASV22254	486	0.357152	TRUE	FALSE	Venezuela (Rural)	d__Bacteria	Firmicutes	Oscillospirales	Ruminococcaceae	NA	Human (USA/Malawi/Venezuela)	TACGTAGGGAGCGAGCGTTGTCCGGAATTACTGGGTGTAAAGGGAGCGTAGGCGGGATGGCAAGTAGAATGTGAAAACAGCCGGCTCAACTGGTTGTTGC
ASV22266	794	-0.0674974	TRUE	TRUE	Malawi (Rural)	d__Bacteria	Firmicutes	Oscillospirales	UCG-010	UCG-010	Human (USA/Malawi/Venezuela)	TACGTAGGTGGCAAGCGTTATCCGGATTTACTGGGTGTAAAGGGTGTGTAGGCGGGACTGCAAGTCAGATGTGAAAATCATGGGCTCAACTCATGACCTG
ASV2233	752	-0.232724	TRUE	TRUE	USA (Urban)	d__Bacteria	Firmicutes	Oscillospirales	[Eubacterium]_coprostanoligenes_group	[Eubacterium]_coprostanoligenes_group	Human (USA/Malawi/Venezuela)	TACGTAGGTGGCAAGCGTTGTCCGGAATTACTGGGTGTAAAGGGAGCGCAGGCGGGAAGCCAAGTCAGCTGTGAAAACTACAGGCTTAACTTGTAGACTG
ASV2233	779	0.209172	TRUE	TRUE	USA (Urban)	d__Bacteria	Firmicutes	Oscillospirales	[Eubacterium]_coprostanoligenes_group	[Eubacterium]_coprostanoligenes_group	Human (USA/Malawi/Venezuela)	TACGTAGGTGGCAAGCGTTGTCCGGAATTACTGGGTGTAAAGGGAGCGCAGGCGGGAAGCCAAGTCAGCTGTGAAAACTACAGGCTTAACTTGTAGACTG
ASV22340	521	-0.357421	TRUE	FALSE	Malawi (Rural)	d__Bacteria	Firmicutes	Oscillospirales	Oscillospiraceae	NA	Human (USA/Malawi/Venezuela)	TACGTAGGTGGCAAGCGTTGTCCGGATTTACTGGGTGTAAAGGGCGTGTAGCCGGGTGTGTAAGTCAGATGTGAAATCTGGAGGCTCAACCTCCAAACTG
ASV22386	788	0.764027	TRUE	TRUE	USA (Urban)	d__Bacteria	Firmicutes	Monoglobales	Monoglobaceae	Monoglobus	Human (USA/Malawi/Venezuela)	TACGTAGGTGGCAAGCGTTGTCCGGATTTACTGGGTGTAAAGGGCGTGTAGGCGGGACTTTAGGTCAGATGTGAAATACCGAGGCTTAACTTCGGAGCTG
ASV22386	768	-0.598418	TRUE	TRUE	USA (Urban)	d__Bacteria	Firmicutes	Monoglobales	Monoglobaceae	Monoglobus	Human (USA/Malawi/Venezuela)	TACGTAGGTGGCAAGCGTTGTCCGGATTTACTGGGTGTAAAGGGCGTGTAGGCGGGACTTTAGGTCAGATGTGAAATACCGAGGCTTAACTTCGGAGCTG
ASV22394	762	-1.26506	TRUE	TRUE	USA (Urban)	d__Bacteria	Bacteroidota	Bacteroidales	Rikenellaceae	Alistipes	Human (USA/Malawi/Venezuela)	TACGGAGGATTCAAGCGTTATCCGGATTTATTGGGTTTAAAGGGTGCGTAGGCGGTTTGATAAGTTAGAGGTGAAATACCGGTGCTTAACACCGGAACTG
ASV22394	765	1.32079	TRUE	TRUE	USA (Urban)	d__Bacteria	Bacteroidota	Bacteroidales	Rikenellaceae	Alistipes	Human (USA/Malawi/Venezuela)	TACGGAGGATTCAAGCGTTATCCGGATTTATTGGGTTTAAAGGGTGCGTAGGCGGTTTGATAAGTTAGAGGTGAAATACCGGTGCTTAACACCGGAACTG
ASV22510	800	1.13043	TRUE	TRUE	USA (Urban)	d__Bacteria	Firmicutes	Oscillospirales	UCG-010	UCG-010	Human (USA/Malawi/Venezuela)	TACGTAGGTGGCGAGCGTTATCCGGATTTACTGGGCGTAAAGGGTGTGTAGGCGGGACTGCAAGTCAGATGTGAAAATTACGGGCTTAACTCGTAACCTG
ASV22549	820	-0.81368	TRUE	TRUE	Malawi (Rural)	d__Bacteria	Firmicutes	Erysipelotrichales	Erysipelotrichaceae	Dielma	Human (USA/Malawi/Venezuela)	TACGTAGGTGGCAAGCGTTATCCGGAATTATTGGGCGTAAAGGGTGCGTAGGCGGCGAGATAAGTCTGAGGTAAAAGCCCGTGGCTCAACCACGGTAAGC
ASV22549	788	0.883216	TRUE	TRUE	Venezuela (Rural)	d__Bacteria	Firmicutes	Erysipelotrichales	Erysipelotrichaceae	Dielma	Human (USA/Malawi/Venezuela)	TACGTAGGTGGCAAGCGTTATCCGGAATTATTGGGCGTAAAGGGTGCGTAGGCGGCGAGATAAGTCTGAGGTAAAAGCCCGTGGCTCAACCACGGTAAGC
ASV22578	781	0.903773	TRUE	TRUE	USA (Urban)	d__Bacteria	Firmicutes	Peptostreptococcales-Tissierellales	Anaerovoracaceae	Family_XIII_AD3011_group	Human (USA/Malawi/Venezuela)	TACGTAGGGGGCAAGCGTTATCCGGAATTATTGGGCGTAAAGAGTACGTAGGTGGTTACCTAAGCACGAGGTATAAGGCAATGGCTCAACCATTGTTCGC
ASV22578	435	0.021977	TRUE	FALSE	Venezuela (Rural)	d__Bacteria	Firmicutes	Peptostreptococcales-Tissierellales	Anaerovoracaceae	Family_XIII_AD3011_group	Human (USA/Malawi/Venezuela)	TACGTAGGGGGCAAGCGTTATCCGGAATTATTGGGCGTAAAGAGTACGTAGGTGGTTACCTAAGCACGAGGTATAAGGCAATGGCTCAACCATTGTTCGC
ASV2271	777	0.128544	TRUE	TRUE	USA (Urban)	d__Bacteria	Firmicutes	RF39	RF39	RF39	Human (USA/Malawi/Venezuela)	TACGTAGGGAGCAAGCGTTATCCGGATTTATTGGGCGTAAAGGGTGCGTAGGCGGCTTGTTAAGTATGAGATTAAAGCCCGAGGCTTAACCTCGGTTCGT
ASV2271	749	-0.0790723	TRUE	TRUE	USA (Urban)	d__Bacteria	Firmicutes	RF39	RF39	RF39	Human (USA/Malawi/Venezuela)	TACGTAGGGAGCAAGCGTTATCCGGATTTATTGGGCGTAAAGGGTGCGTAGGCGGCTTGTTAAGTATGAGATTAAAGCCCGAGGCTTAACCTCGGTTCGT
ASV22778	471	0.33666	TRUE	FALSE	USA (Urban)	d__Bacteria	Desulfobacterota	Desulfovibrionales	Desulfovibrionaceae	Bilophila	Human (USA/Malawi/Venezuela)	TACGGAGGGTGCAAGCGTTAATCGGAATCACTGGGCGTAAAGCGCACGTAGGCGGCTTGGTAAGTCAGGGGGGAAATCCCACAGCCCAACTGTGGAACTG
ASV22835	809	-1.14726	TRUE	TRUE	Malawi (Rural)	d__Bacteria	Firmicutes	Oscillospirales	Ruminococcaceae	Anaerotruncus	Human (USA/Malawi/Venezuela)	TACGTAGGGAGCGAGCGTTGTCCGGAATTACTGGGTGTAAAGGGAGCGTAGGCGGGATGGCAAGTTGGATGTTTAAACTAACGGCTCAACTGTTAGGTGC
ASV22835	686	-0.145041	TRUE	TRUE	USA (Urban)	d__Bacteria	Firmicutes	Oscillospirales	Ruminococcaceae	Anaerotruncus	Human (USA/Malawi/Venezuela)	TACGTAGGGAGCGAGCGTTGTCCGGAATTACTGGGTGTAAAGGGAGCGTAGGCGGGATGGCAAGTTGGATGTTTAAACTAACGGCTCAACTGTTAGGTGC
ASV22898	809	-0.515273	TRUE	TRUE	Malawi (Rural)	d__Bacteria	Firmicutes	Lachnospirales	Lachnospiraceae	NA	Human (USA/Malawi/Venezuela)	TACGTAGGGGGCAAGCGTTATCCGGATTTACTGGGTGTAAAGGGAGCGCAGGCGGTCTGGCAAGTCTGATGTGAAATCCCGGGGCTCAACCCTGGAACTG
ASV23016	479	0.14855	TRUE	FALSE	Venezuela (Rural)	d__Bacteria	Firmicutes	Peptostreptococcales-Tissierellales	Peptostreptococcales-Tissierellales	Murdochiella	Human (USA/Malawi/Venezuela)	TACGTAGGGGGCGAGCGTTGTTCGGAATTATTGGGCGTAAAGGGTACGTAGGCGGTTTGTTAAGTTTGGCGTTAAATCACGGGGCTCAACCCCGTTCAGC
ASV23016	563	-0.296479	TRUE	FALSE	Malawi (Rural)	d__Bacteria	Firmicutes	Peptostreptococcales-Tissierellales	Peptostreptococcales-Tissierellales	Murdochiella	Human (USA/Malawi/Venezuela)	TACGTAGGGGGCGAGCGTTGTTCGGAATTATTGGGCGTAAAGGGTACGTAGGCGGTTTGTTAAGTTTGGCGTTAAATCACGGGGCTCAACCCCGTTCAGC
ASV2303	704	-0.559886	TRUE	TRUE	Malawi (Rural)	d__Bacteria	Firmicutes	Oscillospirales	Oscillospiraceae	UCG-002	Human (USA/Malawi/Venezuela)	TACGTAGGTGGCAAGCGTTGTCCGGATTTACTGGGTGTAAAGGGCGTGTAGCCGGGAGGGCAAGTCAGATGTGAAATCCACGGGCTCAACTCGTGAACTG
ASV2303	816	2.3928	TRUE	TRUE	Venezuela (Rural)	d__Bacteria	Firmicutes	Oscillospirales	Oscillospiraceae	UCG-002	Human (USA/Malawi/Venezuela)	TACGTAGGTGGCAAGCGTTGTCCGGATTTACTGGGTGTAAAGGGCGTGTAGCCGGGAGGGCAAGTCAGATGTGAAATCCACGGGCTCAACTCGTGAACTG
ASV23033	589	-0.6308	TRUE	FALSE	USA (Urban)	d__Bacteria	Firmicutes	NA	NA	NA	Human (USA/Malawi/Venezuela)	TACGTAGGGAGCGAGCGTTGTCCGGATTTACTGGGTGTAAAGGGTGCGTAGGCGGGATGGCAAGTCAGATGTGAAATACCGGGGCTTAACCCCGGGGCTG
ASV23033	808	0.136544	TRUE	TRUE	USA (Urban)	d__Bacteria	Firmicutes	NA	NA	NA	Human (USA/Malawi/Venezuela)	TACGTAGGGAGCGAGCGTTGTCCGGATTTACTGGGTGTAAAGGGTGCGTAGGCGGGATGGCAAGTCAGATGTGAAATACCGGGGCTTAACCCCGGGGCTG
ASV2323	844	3.50944	TRUE	TRUE	USA (Urban)	d__Bacteria	Firmicutes	Oscillospirales	Ruminococcaceae	Incertae_Sedis	Human (USA/Malawi/Venezuela)	TACGTAGGGAGCAAGCGTTGTCCGGATTTACTGGGTGTAAAGGGTGCGTAGGCGGATTGGCAAGTCAGAAGTGAAATCCATGGGCTTAACCCATGAACTG
ASV2323	779	-2.75578	TRUE	TRUE	USA (Urban)	d__Bacteria	Firmicutes	Oscillospirales	Ruminococcaceae	Incertae_Sedis	Human (USA/Malawi/Venezuela)	TACGTAGGGAGCAAGCGTTGTCCGGATTTACTGGGTGTAAAGGGTGCGTAGGCGGATTGGCAAGTCAGAAGTGAAATCCATGGGCTTAACCCATGAACTG
ASV23234	489	-0.0179656	TRUE	FALSE	Malawi (Rural)	d__Bacteria	Firmicutes	Peptostreptococcales-Tissierellales	Anaerovoracaceae	[Eubacterium]_nodatum_group	Human (USA/Malawi/Venezuela)	TACGTAGGGGGCAAGCGTTATCCGGAATTATTGGGCGTAAAGAGTGCGTAGGTGGCACCTTAAGCGCAGGGTTTAAGGCAATGGCTCAACCATTGTTCGC
ASV23307	428	0.233908	TRUE	FALSE	Venezuela (Rural)	d__Bacteria	Firmicutes	Oscillospirales	Butyricicoccaceae	Butyricicoccus	Human (USA/Malawi/Venezuela)	TACGTAGGGAGCAAGCGTTATCCGGATTTACTGGGTGTAAAGGGCGCGCAGGCGGGCTTGCAAGTTGGGAGTGAAATCCCGGGGCTTAACCCCGGAACTG
ASV23307	535	-0.235941	TRUE	FALSE	Malawi (Rural)	d__Bacteria	Firmicutes	Oscillospirales	Butyricicoccaceae	Butyricicoccus	Human (USA/Malawi/Venezuela)	TACGTAGGGAGCAAGCGTTATCCGGATTTACTGGGTGTAAAGGGCGCGCAGGCGGGCTTGCAAGTTGGGAGTGAAATCCCGGGGCTTAACCCCGGAACTG
ASV23388	640	-0.170362	TRUE	TRUE	Malawi (Rural)	d__Bacteria	Firmicutes	Erysipelotrichales	Erysipelatoclostridiaceae	Coprobacillus	Human (USA/Malawi/Venezuela)	TACGTAGGTGGCGAGCGTTATCCGGAATCATTGGGCGTAAAGAGGGAGCAGGCGGCAATAGAGGTCTGCGGTGAAAGCCTGAAGCTAAACTTCAGTAAGC
ASV23408	774	-0.232121	TRUE	TRUE	USA (Urban)	d__Bacteria	Firmicutes	Christensenellales	Christensenellaceae	Christensenellaceae_R-7_group	Human (USA/Malawi/Venezuela)	TACGTAGGGGGCAAGCGTTGTCCGGAATGACTGGGCGTAAAGGGCGTGTAGGCGGCCTGATAAGTATGAAGTGAAAGTCCTGCTTTCAAGGTGGGAATTG
ASV23408	784	0.631368	TRUE	TRUE	USA (Urban)	d__Bacteria	Firmicutes	Christensenellales	Christensenellaceae	Christensenellaceae_R-7_group	Human (USA/Malawi/Venezuela)	TACGTAGGGGGCAAGCGTTGTCCGGAATGACTGGGCGTAAAGGGCGTGTAGGCGGCCTGATAAGTATGAAGTGAAAGTCCTGCTTTCAAGGTGGGAATTG
ASV23434	796	0.282705	TRUE	TRUE	USA (Urban)	d__Bacteria	Firmicutes	Lachnospirales	Lachnospiraceae	Tuzzerella	Human (USA/Malawi/Venezuela)	TACGTAGGGGGCAAGCGTTATCCGGAATTACTGGGTGTAAAGGGTGAGTAGGCGGCATGACAAGTAAGATGTGAAAGCCCGTGGCTTAACCACGGGATTG
ASV23434	770	-0.628763	TRUE	TRUE	USA (Urban)	d__Bacteria	Firmicutes	Lachnospirales	Lachnospiraceae	Tuzzerella	Human (USA/Malawi/Venezuela)	TACGTAGGGGGCAAGCGTTATCCGGAATTACTGGGTGTAAAGGGTGAGTAGGCGGCATGACAAGTAAGATGTGAAAGCCCGTGGCTTAACCACGGGATTG
ASV23470	796	-0.596816	TRUE	TRUE	Malawi (Rural)	d__Bacteria	Firmicutes	Oscillospirales	Ruminococcaceae	Anaerofilum	Human (USA/Malawi/Venezuela)	AACGTAGGTGGCAAGCGTTGTCCGGAATTACTGGGTGTAAAGGGAGCGCAGGCGGAACTGCAAGTTGGATGTCAAATCTACGGGCTCAACCCGTATACGC
ASV23470	679	-0.383308	TRUE	TRUE	USA (Urban)	d__Bacteria	Firmicutes	Oscillospirales	Ruminococcaceae	Anaerofilum	Human (USA/Malawi/Venezuela)	AACGTAGGTGGCAAGCGTTGTCCGGAATTACTGGGTGTAAAGGGAGCGCAGGCGGAACTGCAAGTTGGATGTCAAATCTACGGGCTCAACCCGTATACGC
ASV2356	489	0.382301	TRUE	FALSE	USA (Urban)	d__Bacteria	Firmicutes	Lachnospirales	Lachnospiraceae	Lachnospiraceae_UCG-004	Human (USA/Malawi/Venezuela)	TACGTAGGGGGCAAGCGTTATCCGGATTTACTGGGTGTAAAGGGAGCGTAGACGGCGACGCAAGTCTGAAGTGAAATACCCGGGCTCAACCTGGGAACTG
ASV2356	661	0.143845	TRUE	TRUE	Venezuela (Rural)	d__Bacteria	Firmicutes	Lachnospirales	Lachnospiraceae	Lachnospiraceae_UCG-004	Human (USA/Malawi/Venezuela)	TACGTAGGGGGCAAGCGTTATCCGGATTTACTGGGTGTAAAGGGAGCGTAGACGGCGACGCAAGTCTGAAGTGAAATACCCGGGCTCAACCTGGGAACTG
ASV23577	505	-0.778767	TRUE	FALSE	Malawi (Rural)	d__Bacteria	Verrucomicrobiota	Verrucomicrobiales	Akkermansiaceae	Akkermansia	Human (USA/Malawi/Venezuela)	TACAGAGGTCTCAAGCGTTGTTCGGAATCACTGGGCGTAAAGCGTGCGTAGGCTGTTTCGTAAGTCGTGTGTGAAAGGCACGGGCTCAACCCGCGGACGG
ASV236	824	-0.665867	TRUE	TRUE	Malawi (Rural)	d__Bacteria	Firmicutes	Oscillospirales	Ruminococcaceae	Ruminococcus	Human (USA/Malawi/Venezuela)	TACGTAGGGAGCGAGCGTTGTCCGGAATTACTGGGTGTAAAGGGAGCGTAGGCGGGGCTTTAAGTCAGGTGTGAAATGTATGGGCTCAACCCATAAACTG
ASV23604	812	-0.26741	TRUE	TRUE	Malawi (Rural)	d__Bacteria	Verrucomicrobiota	Victivallales	vadinBE97	vadinBE97	Human (USA/Malawi/Venezuela)	TACGTAGGTGACAAGCGTTGTTCGGATTCATTGGGCGTAAAGGGTCCGCAGGTGGTTTGATAAGTCTGACGTGAAATACCGGAGCTCAACTCCGGAACTG
ASV2380	785	-0.280475	TRUE	TRUE	USA (Urban)	d__Bacteria	Firmicutes	Christensenellales	Christensenellaceae	Christensenellaceae_R-7_group	Human (USA/Malawi/Venezuela)	TACGTAGGGGGCAAGCGTTGTCCGGAATGATTGGGCGTAAAGGGCGTGTAGGCGGCTAAGTAAGTCTGGAGTGAAAGTCCTGCTTTTAAGGTGGGAATTG
ASV2380	802	0.25146	TRUE	TRUE	USA (Urban)	d__Bacteria	Firmicutes	Christensenellales	Christensenellaceae	Christensenellaceae_R-7_group	Human (USA/Malawi/Venezuela)	TACGTAGGGGGCAAGCGTTGTCCGGAATGATTGGGCGTAAAGGGCGTGTAGGCGGCTAAGTAAGTCTGGAGTGAAAGTCCTGCTTTTAAGGTGGGAATTG
ASV23831	704	-0.261549	TRUE	TRUE	USA (Urban)	d__Bacteria	Firmicutes	Peptostreptococcales-Tissierellales	Anaerovoracaceae	[Eubacterium]_nodatum_group	Human (USA/Malawi/Venezuela)	TACGTAGGGGGCGAGCGTTATCCGGAATTATTGGGCGTAAAGAGTGCGTAGGTGGCACCTTAAGCGCAGGGTTTAAGGCAATGGCTCAACCATTGTTCGC
ASV23831	739	0.168754	TRUE	TRUE	USA (Urban)	d__Bacteria	Firmicutes	Peptostreptococcales-Tissierellales	Anaerovoracaceae	[Eubacterium]_nodatum_group	Human (USA/Malawi/Venezuela)	TACGTAGGGGGCGAGCGTTATCCGGAATTATTGGGCGTAAAGAGTGCGTAGGTGGCACCTTAAGCGCAGGGTTTAAGGCAATGGCTCAACCATTGTTCGC
ASV23915	750	0.105817	TRUE	TRUE	USA (Urban)	d__Bacteria	Firmicutes	Oscillospirales	Ruminococcaceae	Subdoligranulum	Human (USA/Malawi/Venezuela)	AACGTAGGGTGCAAGCGTTGTCCGGAATTACTGGGTGTAAAGGGAGCGCAGGCGGACCGGCAAGTTGGGAGTGAAATCCATGGGCTCAACCCGTGAATTG
ASV23915	741	0.0615697	TRUE	TRUE	Venezuela (Rural)	d__Bacteria	Firmicutes	Oscillospirales	Ruminococcaceae	Subdoligranulum	Human (USA/Malawi/Venezuela)	AACGTAGGGTGCAAGCGTTGTCCGGAATTACTGGGTGTAAAGGGAGCGCAGGCGGACCGGCAAGTTGGGAGTGAAATCCATGGGCTCAACCCGTGAATTG
ASV23932	471	0.136327	TRUE	FALSE	USA (Urban)	d__Bacteria	Firmicutes	Peptostreptococcales-Tissierellales	Anaerovoracaceae	Family_XIII_AD3011_group	Human (USA/Malawi/Venezuela)	TACGTAGGGGGCAAGCGTTATCCGGAATTATTGGGCGTAAAGAGTGCGTAGGTGGTAACTTAAGCGCGGGGTTTAAGGCAATGGCTTAACCATTGTTCGC
ASV23938	844	-2.85357	TRUE	TRUE	USA (Urban)	d__Bacteria	Bacteroidota	Bacteroidales	Rikenellaceae	Alistipes	Human (USA/Malawi/Venezuela)	TACGGAGGATTCAAGCGTTATCCGGATTTATTGGGTTTAAAGGGTGCGTAGGCGGTTTGATAAGTTAGAGGTGAAATCCCGGGGCTTAACTCCGGAACTG
ASV23938	869	3.37031	TRUE	TRUE	USA (Urban)	d__Bacteria	Bacteroidota	Bacteroidales	Rikenellaceae	Alistipes	Human (USA/Malawi/Venezuela)	TACGGAGGATTCAAGCGTTATCCGGATTTATTGGGTTTAAAGGGTGCGTAGGCGGTTTGATAAGTTAGAGGTGAAATCCCGGGGCTTAACTCCGGAACTG
ASV23962	624	-0.010375	TRUE	TRUE	Malawi (Rural)	d__Bacteria	Firmicutes	Oscillospirales	UCG-010	UCG-010	Human (USA/Malawi/Venezuela)	TACGTAGGTGGCGAGCGTTATCCGGATTTACTGGGTGTAAAGGGTGAGTAGGCGGGAAGTCAAGTCAGATGTGAAATGCCGCGGCTTAACTGCGGAACTG
ASV23962	559	-2.60303e-05	TRUE	FALSE	USA (Urban)	d__Bacteria	Firmicutes	Oscillospirales	UCG-010	UCG-010	Human (USA/Malawi/Venezuela)	TACGTAGGTGGCGAGCGTTATCCGGATTTACTGGGTGTAAAGGGTGAGTAGGCGGGAAGTCAAGTCAGATGTGAAATGCCGCGGCTTAACTGCGGAACTG
ASV23963	738	-1.68227	TRUE	TRUE	USA (Urban)	d__Bacteria	Firmicutes	Lachnospirales	Lachnospiraceae	[Eubacterium]_hallii_group	Human (USA/Malawi/Venezuela)	TACGTATGGAGCAAGCGTTATCCGGATTTACTGGGTGTAAAGGGTGCGTAGGTGGCAGTGCAAGTCAGATGTGAAAGGCCGGGGCTCAACCCCGGAGCTG
ASV23963	770	1.6393	TRUE	TRUE	USA (Urban)	d__Bacteria	Firmicutes	Lachnospirales	Lachnospiraceae	[Eubacterium]_hallii_group	Human (USA/Malawi/Venezuela)	TACGTATGGAGCAAGCGTTATCCGGATTTACTGGGTGTAAAGGGTGCGTAGGTGGCAGTGCAAGTCAGATGTGAAAGGCCGGGGCTCAACCCCGGAGCTG
ASV23989	575	-0.515967	TRUE	FALSE	Malawi (Rural)	d__Bacteria	Firmicutes	Oscillospirales	Ruminococcaceae	Candidatus_Soleaferrea	Human (USA/Malawi/Venezuela)	TACGTAGGGAGCGAGCGTTGTCCGGAATTACTGGGTGTAAAGGGAGTGTAGGCGGGTTTTCAAGTCCGTTGTGAAATCTATCGGCTCAACCGATAGCTGC
ASV23989	461	0.512046	TRUE	FALSE	Venezuela (Rural)	d__Bacteria	Firmicutes	Oscillospirales	Ruminococcaceae	Candidatus_Soleaferrea	Human (USA/Malawi/Venezuela)	TACGTAGGGAGCGAGCGTTGTCCGGAATTACTGGGTGTAAAGGGAGTGTAGGCGGGTTTTCAAGTCCGTTGTGAAATCTATCGGCTCAACCGATAGCTGC
ASV24072	455	0.0728679	TRUE	FALSE	USA (Urban)	d__Bacteria	Firmicutes	RF39	RF39	RF39	Human (USA/Malawi/Venezuela)	TACGTAGGGGGCAAGCGTTATCCGGATTTATTGGGCGTAAAGCGTGTGTAGGCGGTTTGTTAAGTTTAAGATTAAAGCCTGGGGCTCAACTCCAGTTCGT
ASV24081	499	-0.418595	TRUE	FALSE	Malawi (Rural)	d__Bacteria	Bacteroidota	Bacteroidales	Muribaculaceae	Muribaculaceae	Human (USA/Malawi/Venezuela)	TACGGAGGATGCGAGCGTTATCCGGATTTATTGGGTTTAAAGGGTGCGTAGGCGGAAGTTCAAGTCAGCGGTAAAATCGAGGGGCTCAACCCCTTTAAGC
ASV24188	509	0.738669	TRUE	FALSE	USA (Urban)	d__Bacteria	Firmicutes	Lachnospirales	Lachnospiraceae	Dorea	Human (USA/Malawi/Venezuela)	TACGTAGGGGGCAAGCGTTATCCGGATTTACTGGGTGTAAAGGGAGCGTAGACGGCTGTGCAAGTCTGAAGTGAAAGGCATGGGCTCAACCTGTGGACTG
ASV2419	812	0.0944511	TRUE	TRUE	Venezuela (Rural)	d__Bacteria	Bacteroidota	Bacteroidales	Tannerellaceae	Parabacteroides	Human (USA/Malawi/Venezuela)	TACGGAGGATGCGAGCGTTATCCGGATTTATTGGGTTTAAAGGGTGCGTAGGTCGCCGATTAAGTCAGCGGTGAAATCCAGTGGCTCAACCATTGGACTG
ASV24237	480	-0.403063	TRUE	FALSE	Malawi (Rural)	d__Bacteria	Firmicutes	Oscillospirales	Oscillospiraceae	UCG-005	Human (USA/Malawi/Venezuela)	TACGTAGGTGGCAAGCGTTGTCCGGATTTACTGGGTGTAAAGGGCGTGTAGGCGGGAAGACAGGTCAGAAGTGAAATGCCGGGGCTCAACCCCGGAGCTG
ASV24317	703	0.00966809	TRUE	TRUE	Venezuela (Rural)	d__Bacteria	Firmicutes	Lachnospirales	Lachnospiraceae	GCA-900066575	Human (USA/Malawi/Venezuela)	TACGTAGGGGGCAAGCGTTATCCGGATTTACTGGGTGTAAAGGGAGCGTAGGCGGTCTGACAAGTCAGAAGTGAAAGCCCGGGGCTCAACTCCGGGACTG
ASV24317	776	-0.18818	TRUE	TRUE	Malawi (Rural)	d__Bacteria	Firmicutes	Lachnospirales	Lachnospiraceae	GCA-900066575	Human (USA/Malawi/Venezuela)	TACGTAGGGGGCAAGCGTTATCCGGATTTACTGGGTGTAAAGGGAGCGTAGGCGGTCTGACAAGTCAGAAGTGAAAGCCCGGGGCTCAACTCCGGGACTG
ASV24387	761	0.959848	TRUE	TRUE	Venezuela (Rural)	d__Bacteria	Firmicutes	Lachnospirales	Lachnospiraceae	Blautia	Human (USA/Malawi/Venezuela)	TACGTAGGGGGCAAGCGTTATCCGGATTTACTGGGTGTAAAGGGAGCGTAGACGGTGTGGCAAGTCTGATGTGAAAGGCATGGGCTCAACCCGTGGACTG
ASV24387	780	-0.750201	TRUE	TRUE	Malawi (Rural)	d__Bacteria	Firmicutes	Lachnospirales	Lachnospiraceae	Blautia	Human (USA/Malawi/Venezuela)	TACGTAGGGGGCAAGCGTTATCCGGATTTACTGGGTGTAAAGGGAGCGTAGACGGTGTGGCAAGTCTGATGTGAAAGGCATGGGCTCAACCCGTGGACTG
ASV24436	808	1.2551	TRUE	TRUE	USA (Urban)	d__Bacteria	Firmicutes	Clostridia_vadinBB60_group	Clostridia_vadinBB60_group	Clostridia_vadinBB60_group	Human (USA/Malawi/Venezuela)	TACGTAGGTGGCAAGCGTTGTCCGGAATGACTGGGCGTAAAGGGTACGTAGGTGGCTATTCAAGTTAGTGGTGAAATTCCGGGGCTTAACTCCGGCGCTA
ASV24452	748	0.245268	TRUE	TRUE	USA (Urban)	d__Bacteria	Bacteroidota	Bacteroidales	Porphyromonadaceae	Porphyromonas	Human (USA/Malawi/Venezuela)	TACGGAGGATACGAGCGTTATCCGGATTTATTGGGTTTAAAGGGTGCGCAGGTGGTCTTGCAAGTCAGTGGTGAAAAGCTGAGGCTCAACCTCAGCCTTG
ASV24469	483	0.00545327	TRUE	FALSE	USA (Urban)	d__Bacteria	Bacteroidota	Bacteroidales	Barnesiellaceae	Barnesiella	Human (USA/Malawi/Venezuela)	TACGGAGGATGCAAGCGTTATCCGGATTTATTGGGTTTAAAGGGTGCGTAGGCGGCACGCCAAGTCAGCGGTGAAATTTCCGGGCTCAACCCGGAGTGTG
ASV24568	717	0.158262	TRUE	TRUE	Venezuela (Rural)	d__Bacteria	Firmicutes	Oscillospirales	Ruminococcaceae	Paludicola	Human (USA/Malawi/Venezuela)	TACGTAGGTAGCGAGCGTTGTCCGGAATTACTGGGTGTAAAGGGAGCGTAGGCGGGATTGCAAGTTGAATGTCAAATCTACGGGCTTAACCCGTAGCCGC
ASV24568	810	-1.48098	TRUE	TRUE	Malawi (Rural)	d__Bacteria	Firmicutes	Oscillospirales	Ruminococcaceae	Paludicola	Human (USA/Malawi/Venezuela)	TACGTAGGTAGCGAGCGTTGTCCGGAATTACTGGGTGTAAAGGGAGCGTAGGCGGGATTGCAAGTTGAATGTCAAATCTACGGGCTTAACCCGTAGCCGC
ASV2464	448	0.664778	TRUE	FALSE	Venezuela (Rural)	d__Bacteria	Firmicutes	Oscillospirales	Ruminococcaceae	NA	Human (USA/Malawi/Venezuela)	TACGTAGGTGGCAAGCGTTGTCCGGAATTACTGGGTGTAAAGGGAGCGTAGGCGGGAAGTCAAGTTGAATGTGAAATCGATCGGCTCAACCGGTCGCTGC
ASV2464	613	-0.9306	TRUE	FALSE	Malawi (Rural)	d__Bacteria	Firmicutes	Oscillospirales	Ruminococcaceae	NA	Human (USA/Malawi/Venezuela)	TACGTAGGTGGCAAGCGTTGTCCGGAATTACTGGGTGTAAAGGGAGCGTAGGCGGGAAGTCAAGTTGAATGTGAAATCGATCGGCTCAACCGGTCGCTGC
ASV24648	589	0.023536	TRUE	FALSE	Venezuela (Rural)	d__Bacteria	Bacteroidota	Bacteroidales	Prevotellaceae	Prevotella	Human (USA/Malawi/Venezuela)	TACGGAAGGTCCGGGCGTTATCCGGATTTATTGGGTTTAAAGGGAGCGTAGGCTGTCTATTAAGCGTGTTGTGAAATATACCGGCTCAACCGGTGGCTTG
ASV24658	587	-0.744708	TRUE	FALSE	Malawi (Rural)	d__Bacteria	Firmicutes	Christensenellales	Christensenellaceae	uncultured	Human (USA/Malawi/Venezuela)	TACGTAGGGAGCAAGCGTTGTCCGGAATTACTGGGCGTAAAGGGTGCGTAGGCGGCGCGTTAAGTCAGATGTGAAATACCCGTGCTTAACATGGGGGGTG
ASV24660	697	0.42945	TRUE	TRUE	Venezuela (Rural)	d__Bacteria	Firmicutes	Lachnospirales	Lachnospiraceae	NA	Human (USA/Malawi/Venezuela)	TACGTAGGGGGCAAGCGTTATCCGGATTTACTGGGTGTAAAGGGAGCGTAGACGGTAGACCAAGTCTGAAGTGAAAGCCCGGGGCTCAACCCCGGAACTG
ASV24660	728	-0.1565	TRUE	TRUE	Malawi (Rural)	d__Bacteria	Firmicutes	Lachnospirales	Lachnospiraceae	NA	Human (USA/Malawi/Venezuela)	TACGTAGGGGGCAAGCGTTATCCGGATTTACTGGGTGTAAAGGGAGCGTAGACGGTAGACCAAGTCTGAAGTGAAAGCCCGGGGCTCAACCCCGGAACTG
ASV24821	762	-0.197301	TRUE	TRUE	Malawi (Rural)	d__Bacteria	Firmicutes	Lachnospirales	Lachnospiraceae	NA	Human (USA/Malawi/Venezuela)	TACGTAGGGGGCAAGCGTTATCCGGATTTACTGGGTGTAAAGGGAGCGTAGACGGCGGCGCAAGTCTGAAGTGAAATACCCGGGCTCAACCTGGGAACTG
ASV24824	691	-0.0514663	TRUE	TRUE	USA (Urban)	d__Bacteria	Actinobacteriota	Actinomycetales	Actinomycetaceae	Actinomyces	Human (USA/Malawi/Venezuela)	TACGTAGGGCGCGAGCGTTGTCCGGAATTATTGGGCGTAAAGGGCTTGTAGGCGGTTGGCCGCGTCTGCCGTGAAATCCTCTGGCTTAACTGGGGGCGTG
ASV24890	534	-0.423821	TRUE	FALSE	Malawi (Rural)	d__Bacteria	Bacteroidota	Bacteroidales	Porphyromonadaceae	Porphyromonas	Human (USA/Malawi/Venezuela)	TACGGAGGATACGAGCGTTATCCGGATTTATTGGGTTTAAAGGGTGCGCAGGTGGTCCTGCAAGTCAGTGGTGAAAAGCTGAGGCTCAACCTCAGCCTTG
ASV2490	526	-0.814951	TRUE	FALSE	Malawi (Rural)	d__Bacteria	Verrucomicrobiota	Verrucomicrobiales	Akkermansiaceae	Akkermansia	Human (USA/Malawi/Venezuela)	TACAGAGGTCTCAAGCGTTGTTCGGAATCACTGGGCGTAAAGCGTGCGTAGGCTGTTTCGTAAGTCGTGTGTGAAAGGCGTGGGCTCAACCCGCGGACGG
ASV24916	822	1.14041	TRUE	TRUE	Venezuela (Rural)	d__Bacteria	Bacteroidota	Bacteroidales	Rikenellaceae	Rikenellaceae_RC9_gut_group	Human (USA/Malawi/Venezuela)	TACGGGGGATGCGAGCGTTATCCGGATTTATTGGGTTTAAAGGGTGCGTAGGCGGCGAATTAAGTCAGCGGTGAAAGACCGGGGCTCAACCCTGGAAGTG
ASV24916	742	-0.495489	TRUE	TRUE	Malawi (Rural)	d__Bacteria	Bacteroidota	Bacteroidales	Rikenellaceae	Rikenellaceae_RC9_gut_group	Human (USA/Malawi/Venezuela)	TACGGGGGATGCGAGCGTTATCCGGATTTATTGGGTTTAAAGGGTGCGTAGGCGGCGAATTAAGTCAGCGGTGAAAGACCGGGGCTCAACCCTGGAAGTG
ASV24971	491	-0.0528608	TRUE	FALSE	Malawi (Rural)	d__Bacteria	Firmicutes	Christensenellales	Christensenellaceae	uncultured	Human (USA/Malawi/Venezuela)	TACGTAGGGAGCAAGCGTTGTCCGGAATTACTGGGCGTAAAGGGTGCGTAGGCGGCGCAGTTAGTCAGAAGTGAAATATCGGGGCTTAACCCCGGGGCTG
ASV24979	480	-0.0318548	TRUE	FALSE	Malawi (Rural)	d__Bacteria	Bacteroidota	Bacteroidales	Rikenellaceae	Alistipes	Human (USA/Malawi/Venezuela)	TACGGAGGATCCAAGCGTTATCCGGATTTATTGGGTTTAAAGGGTGCGTAGGCGGCAGATTAAGTTAGAGGTGAAATTCCGAGGCTCAACCTTGGCACTG
ASV24996	801	0.228073	TRUE	TRUE	Venezuela (Rural)	d__Bacteria	Firmicutes	Peptostreptococcales-Tissierellales	Anaerovoracaceae	[Eubacterium]_brachy_group	Human (USA/Malawi/Venezuela)	TACGTAGGGGGCGAGCGTTATCCGGAATTATTGGGCGTAAAGAGTACGTAGGCGGTTTTTTAAGCGAGGGGTATAAGGCAGCGGCTTAACTGCTGTTGGC
ASV24996	837	-0.348373	TRUE	TRUE	Malawi (Rural)	d__Bacteria	Firmicutes	Peptostreptococcales-Tissierellales	Anaerovoracaceae	[Eubacterium]_brachy_group	Human (USA/Malawi/Venezuela)	TACGTAGGGGGCGAGCGTTATCCGGAATTATTGGGCGTAAAGAGTACGTAGGCGGTTTTTTAAGCGAGGGGTATAAGGCAGCGGCTTAACTGCTGTTGGC
ASV25050	571	-0.502916	TRUE	FALSE	Malawi (Rural)	d__Bacteria	Firmicutes	Bacillales	Bacillaceae	Bacillus	Human (USA/Malawi/Venezuela)	TACGTAGGTGGCAAGCGTTGTCCGGAATTATTGGGCGTAAAGCGCGCGCAGGCGGCTTCTTAAGTCTGATGTGAAATCTCGGGGCTCAACCCCGAGCGGC
ASV25050	455	0.500902	TRUE	FALSE	Venezuela (Rural)	d__Bacteria	Firmicutes	Bacillales	Bacillaceae	Bacillus	Human (USA/Malawi/Venezuela)	TACGTAGGTGGCAAGCGTTGTCCGGAATTATTGGGCGTAAAGCGCGCGCAGGCGGCTTCTTAAGTCTGATGTGAAATCTCGGGGCTCAACCCCGAGCGGC
ASV25070	470	-0.144575	TRUE	FALSE	Malawi (Rural)	d__Bacteria	NA	NA	NA	NA	Human (USA/Malawi/Venezuela)	TACGGAGGGTGCGAGCGTTAATCGGAATTACTGGGCGTAAAGCGCACGTAGGCTGTATATCAAGTCAAGGGTGAAATCCCCGGGCTCAACCTGGGAACTG
ASV25092	793	0.803938	TRUE	TRUE	USA (Urban)	d__Bacteria	Firmicutes	RF39	RF39	RF39	Human (USA/Malawi/Venezuela)	TACGTAGGGAGCAAGCGTTATCCGGATTTATTGGGTGTAAAGGGTGCGTAGGCGGCTAGATAGGTCTATGGTTTAAGTCCGAAGCTTAACTTCGGTTCGC
ASV2518	645	-0.216439	TRUE	TRUE	Malawi (Rural)	d__Bacteria	Firmicutes	Peptostreptococcales-Tissierellales	Anaerovoracaceae	NA	Human (USA/Malawi/Venezuela)	TACGTAGGGGGCGAGCGTTATCCGGAATTATTGGGCGTAAAGAGTTCGTAGGCGGTTTTTTAAGCGCGGGGTGAAAGGCAATGGCTTAACCATTGTTAGC
ASV2518	477	0.157448	TRUE	FALSE	Venezuela (Rural)	d__Bacteria	Firmicutes	Peptostreptococcales-Tissierellales	Anaerovoracaceae	NA	Human (USA/Malawi/Venezuela)	TACGTAGGGGGCGAGCGTTATCCGGAATTATTGGGCGTAAAGAGTTCGTAGGCGGTTTTTTAAGCGCGGGGTGAAAGGCAATGGCTTAACCATTGTTAGC
ASV25210	655	-0.720697	TRUE	TRUE	USA (Urban)	d__Bacteria	Firmicutes	Oscillospirales	Ruminococcaceae	Incertae_Sedis	Human (USA/Malawi/Venezuela)	TACGTAGGGAGCGAGCGTTGTCCGGATTTACTGGGTGTAAAGGGTGCGTAGGCGGCTCTGCAAGTCAGAAGTGAAATCCATGGGCTTAACCCATGAACTG
ASV25210	715	0.711645	TRUE	TRUE	USA (Urban)	d__Bacteria	Firmicutes	Oscillospirales	Ruminococcaceae	Incertae_Sedis	Human (USA/Malawi/Venezuela)	TACGTAGGGAGCGAGCGTTGTCCGGATTTACTGGGTGTAAAGGGTGCGTAGGCGGCTCTGCAAGTCAGAAGTGAAATCCATGGGCTTAACCCATGAACTG
ASV25244	818	-0.861382	TRUE	TRUE	Malawi (Rural)	d__Bacteria	Firmicutes	Oscillospirales	Oscillospiraceae	UCG-002	Human (USA/Malawi/Venezuela)	TACGTAGGTGGCAAGCGTTGTCCGGATTTACTGGGTGTAAAGGGCGTGTAGCCGGGAGGGCAAGTCAGATGTGAAATCCACGGGCTTAACTCGTGAACTG
ASV25244	741	0.914662	TRUE	TRUE	Venezuela (Rural)	d__Bacteria	Firmicutes	Oscillospirales	Oscillospiraceae	UCG-002	Human (USA/Malawi/Venezuela)	TACGTAGGTGGCAAGCGTTGTCCGGATTTACTGGGTGTAAAGGGCGTGTAGCCGGGAGGGCAAGTCAGATGTGAAATCCACGGGCTTAACTCGTGAACTG
ASV25283	825	-0.96957	TRUE	TRUE	Malawi (Rural)	d__Bacteria	Firmicutes	Oscillospirales	Ruminococcaceae	Phocea	Human (USA/Malawi/Venezuela)	TACGTAGGGAGCGAGCGTTGTCCGGAATTACTGGGTGTAAAGGGAGCGTAGGCGGGGTCTCAAGTCGAATGTTAAATCTACCGGCTCAACTGGTAGCTGC
ASV25283	793	0.737136	TRUE	TRUE	Venezuela (Rural)	d__Bacteria	Firmicutes	Oscillospirales	Ruminococcaceae	Phocea	Human (USA/Malawi/Venezuela)	TACGTAGGGAGCGAGCGTTGTCCGGAATTACTGGGTGTAAAGGGAGCGTAGGCGGGGTCTCAAGTCGAATGTTAAATCTACCGGCTCAACTGGTAGCTGC
ASV25412	539	-0.273792	TRUE	FALSE	Malawi (Rural)	d__Bacteria	Firmicutes	Oscillospirales	UCG-010	UCG-010	Human (USA/Malawi/Venezuela)	TACGTAGGTGGCAAGCGTTGTCCGGATTTACTGGGTGTAAAGGGCGAGTAGGCGGGACGGAAAGTCAGTAGTGAAATACCGAGGCTTAACTTCGGGGCTG
ASV25412	535	-0.185169	TRUE	FALSE	USA (Urban)	d__Bacteria	Firmicutes	Oscillospirales	UCG-010	UCG-010	Human (USA/Malawi/Venezuela)	TACGTAGGTGGCAAGCGTTGTCCGGATTTACTGGGTGTAAAGGGCGAGTAGGCGGGACGGAAAGTCAGTAGTGAAATACCGAGGCTTAACTTCGGGGCTG
ASV25467	782	-0.797765	TRUE	TRUE	USA (Urban)	d__Bacteria	Firmicutes	Christensenellales	Christensenellaceae	Christensenellaceae_R-7_group	Human (USA/Malawi/Venezuela)	TACGTAGGGGGCAAGCGTTGTCCGGAATGACTGGGCGTAAAGGGCGCGTAGGCGGCTTTTTAAGTTAGAAGTGGAAGTCCTGCTTTCAAGGTGGGAATTG
ASV25557	455	0.688986	TRUE	FALSE	Venezuela (Rural)	d__Bacteria	Firmicutes	Peptostreptococcales-Tissierellales	Anaerovoracaceae	[Eubacterium]_brachy_group	Human (USA/Malawi/Venezuela)	TACGTAGGGGGCAAGCGTTATCCGGAATTATTGGGCGTAAAGAGTATGTAGGTGGTTTCTTAAGCGCAGGGTATAAGGCAATGGCTTAACCATTGTTCGC
ASV25557	560	-0.696576	TRUE	FALSE	Malawi (Rural)	d__Bacteria	Firmicutes	Peptostreptococcales-Tissierellales	Anaerovoracaceae	[Eubacterium]_brachy_group	Human (USA/Malawi/Venezuela)	TACGTAGGGGGCAAGCGTTATCCGGAATTATTGGGCGTAAAGAGTATGTAGGTGGTTTCTTAAGCGCAGGGTATAAGGCAATGGCTTAACCATTGTTCGC
ASV25580	430	0.812909	TRUE	FALSE	Venezuela (Rural)	d__Bacteria	Firmicutes	Oscillospirales	NA	NA	Human (USA/Malawi/Venezuela)	TACGTAGGGAGCAAGCGTTGTCCGGAATTACTGGGTGTAAAGGGAGCGTAGGCGGGCTCGCAAGTTGAATGTGAAATCCAGAGGCTTAACCTCTGGCTGC
ASV25580	510	-0.821859	TRUE	FALSE	Malawi (Rural)	d__Bacteria	Firmicutes	Oscillospirales	NA	NA	Human (USA/Malawi/Venezuela)	TACGTAGGGAGCAAGCGTTGTCCGGAATTACTGGGTGTAAAGGGAGCGTAGGCGGGCTCGCAAGTTGAATGTGAAATCCAGAGGCTTAACCTCTGGCTGC
ASV25625	499	-0.531833	TRUE	FALSE	Malawi (Rural)	d__Bacteria	Firmicutes	Lactobacillales	NA	NA	Human (USA/Malawi/Venezuela)	TACGTAGGTGGCAAGCGTTGTCCGGATTTATTGGGCGTAAAGCGAGCGCAGGCGGTTCCTTAAGTCTGATGTGAAAGCCCCCGGCTCAACCGGGGAGGGT
ASV25625	626	1.59631	TRUE	TRUE	Venezuela (Rural)	d__Bacteria	Firmicutes	Lactobacillales	NA	NA	Human (USA/Malawi/Venezuela)	TACGTAGGTGGCAAGCGTTGTCCGGATTTATTGGGCGTAAAGCGAGCGCAGGCGGTTCCTTAAGTCTGATGTGAAAGCCCCCGGCTCAACCGGGGAGGGT
ASV25645	777	-1.49075	TRUE	TRUE	USA (Urban)	d__Bacteria	Firmicutes	Oscillospirales	Ruminococcaceae	Paludicola	Human (USA/Malawi/Venezuela)	TACGTAGGTAGCGAGCGTTATCCGGAATTACTGGGTGTAAAGGGAGCGTAGGCGGGATTGCAAGTTGAATGTGAAACCTATGGGCTTAACCCATAGTTGC
ASV25706	825	-1.01807	TRUE	TRUE	Malawi (Rural)	d__Bacteria	Firmicutes	Oscillospirales	Ruminococcaceae	Subdoligranulum	Human (USA/Malawi/Venezuela)	AACGTAGGGTGCAAGCGTTGTCCGGAATTACTGGGTGTAAAGGGAGCGCAGGCGGACCGGCAAGTTGGAAGTGAAAACCATGGGCTCAACCCATGAATTG
ASV25716	612	0.00320006	TRUE	FALSE	USA (Urban)	d__Bacteria	Firmicutes	Lactobacillales	NA	NA	Human (USA/Malawi/Venezuela)	TACGTAGGTGGCAAGCGTTGTCCGGATTTATTGGGCGTAAAGCGAGCGCAGGCGGTTCCTTAAGTCTGATGTGAAAGCCCCCGGCTCAACCGGGGAGGGG
ASV25716	440	0.930003	TRUE	FALSE	Venezuela (Rural)	d__Bacteria	Firmicutes	Lactobacillales	NA	NA	Human (USA/Malawi/Venezuela)	TACGTAGGTGGCAAGCGTTGTCCGGATTTATTGGGCGTAAAGCGAGCGCAGGCGGTTCCTTAAGTCTGATGTGAAAGCCCCCGGCTCAACCGGGGAGGGG
ASV25754	794	0.81984	TRUE	TRUE	USA (Urban)	d__Bacteria	Actinobacteriota	Coriobacteriales	Atopobiaceae	Atopobium	Human (USA/Malawi/Venezuela)	TACGTAGGGGGCAAGCGTTATCCGGATTCATTGGGCGTAAAGCGCTCGTAGGCGGTCTGTTAGGTCGGGAGTTAAATCCGGGGGCTCAACCCCCGCTCGC
ASV25754	769	-0.969177	TRUE	TRUE	USA (Urban)	d__Bacteria	Actinobacteriota	Coriobacteriales	Atopobiaceae	Atopobium	Human (USA/Malawi/Venezuela)	TACGTAGGGGGCAAGCGTTATCCGGATTCATTGGGCGTAAAGCGCTCGTAGGCGGTCTGTTAGGTCGGGAGTTAAATCCGGGGGCTCAACCCCCGCTCGC
ASV25790	739	0.174072	TRUE	TRUE	USA (Urban)	d__Bacteria	Firmicutes	Oscillospirales	[Eubacterium]_coprostanoligenes_group	[Eubacterium]_coprostanoligenes_group	Human (USA/Malawi/Venezuela)	TACGTAGGTGGCAAGCGTTGTCCGGAATTACTGGGTGTAAAGGGAGCGTAGGCGGGATGCCAAGTCAGCTGTGAAAACTATGGGCTTAACTTGTAGACTG
ASV25841	819	-0.499144	TRUE	TRUE	Malawi (Rural)	d__Bacteria	Cyanobacteria	Gastranaerophilales	Gastranaerophilales	Gastranaerophilales	Human (USA/Malawi/Venezuela)	TACGGAGGGTGCAAGCGTTGTCCGGAATCATTGGGCGTAAAGAGTTCGTAGGTGGTTTGTTAAGTTTGGTGTTAAATGCAGGGGCTCAACCTCTGTTCGG
ASV25889	491	-0.318934	TRUE	FALSE	Malawi (Rural)	d__Bacteria	Firmicutes	Christensenellales	Christensenellaceae	Christensenellaceae_R-7_group	Human (USA/Malawi/Venezuela)	TACGTAGGGGGCGAGCGTTGTCCGGAATGACTGGGCGTAAAGGGCGTGTAGGCGGTTGATTAAGTCTGGTGTGAAATACCCGCTTTTAAGGTGGGTCGTG
ASV25896	496	-0.45471	TRUE	FALSE	Malawi (Rural)	d__Bacteria	Firmicutes	Clostridia_vadinBB60_group	Clostridia_vadinBB60_group	Clostridia_vadinBB60_group	Human (USA/Malawi/Venezuela)	TACGTAGGGGGCAAGCGTTGTCCGGAATGACTGGGCGTAAAGGGAGTGTAGGCGGCATGACAAGTTAGATGTGAAAGCCCGCAGCTTAACTGCGGAACTG
ASV25904	669	-1.70192	TRUE	TRUE	USA (Urban)	d__Bacteria	Firmicutes	Peptostreptococcales-Tissierellales	Peptostreptococcaceae	Romboutsia	Human (USA/Malawi/Venezuela)	TACGTAGGGGGCTAGCGTTATCCGGAATTACTGGGCGTAAAGGGTGCGTAGGTGGTTTCTTAAGTCAGAGGTGAAAGGCTACGGCTCAACCGTAGTAAGC
ASV25946	807	-0.562471	TRUE	TRUE	Malawi (Rural)	d__Bacteria	Firmicutes	Oscillospirales	Ruminococcaceae	Ruminococcus	Human (USA/Malawi/Venezuela)	TACGTAGGGAGCGAGCGTTGTCCGGAATTACTGGGTGTAAAGGGAGCGTAGGCGGGACGGCAAGTCAGATGTGAAATACATGGGCTCAACCCATGGGCTG
ASV25946	736	0.217874	TRUE	TRUE	Venezuela (Rural)	d__Bacteria	Firmicutes	Oscillospirales	Ruminococcaceae	Ruminococcus	Human (USA/Malawi/Venezuela)	TACGTAGGGAGCGAGCGTTGTCCGGAATTACTGGGTGTAAAGGGAGCGTAGGCGGGACGGCAAGTCAGATGTGAAATACATGGGCTCAACCCATGGGCTG
ASV25963	735	-0.208266	TRUE	TRUE	USA (Urban)	d__Bacteria	Firmicutes	NA	NA	NA	Human (USA/Malawi/Venezuela)	TACGTAGGGAGCGAGCGTTGTCCGGATTTACTGGGTGTAAAGGGTGCGTAGGCGGGCTGTCAAGTCAGATGTGAAATACCGGGGCTCAACTCCGGGGCTG
ASV25963	789	0.272435	TRUE	TRUE	USA (Urban)	d__Bacteria	Firmicutes	NA	NA	NA	Human (USA/Malawi/Venezuela)	TACGTAGGGAGCGAGCGTTGTCCGGATTTACTGGGTGTAAAGGGTGCGTAGGCGGGCTGTCAAGTCAGATGTGAAATACCGGGGCTCAACTCCGGGGCTG
ASV2597	492	0.0930294	TRUE	FALSE	USA (Urban)	d__Bacteria	Bacteroidota	Bacteroidales	Barnesiellaceae	Barnesiella	Human (USA/Malawi/Venezuela)	TACGGAGGATGCGAGCGTTATCCGGATTTATTGGGTTTAAAGGGTGCGTAGGCGGCACGCCAAGTCAGCGGTGAAATTTCCGGGCTCAACCCGGAGTGTG
ASV25985	532	0.704373	TRUE	FALSE	USA (Urban)	d__Bacteria	Firmicutes	Oscillospirales	UCG-010	UCG-010	Human (USA/Malawi/Venezuela)	TACGTAGGTGGCAAGCGTTATCCGGATTTATTGGGTGTAAAGGGTGTGTAGGCGGGACTGCAAGTCAGACGTGAAAATCATGGGCTCAACCCATGACTTG
ASV25985	731	-0.241455	TRUE	TRUE	USA (Urban)	d__Bacteria	Firmicutes	Oscillospirales	UCG-010	UCG-010	Human (USA/Malawi/Venezuela)	TACGTAGGTGGCAAGCGTTATCCGGATTTATTGGGTGTAAAGGGTGTGTAGGCGGGACTGCAAGTCAGACGTGAAAATCATGGGCTCAACCCATGACTTG
ASV26111	429	0.646991	TRUE	FALSE	Venezuela (Rural)	d__Bacteria	Firmicutes	Lactobacillales	NA	NA	Human (USA/Malawi/Venezuela)	TACGTAGGTGGCAAGCGTTGTCCGGATTTATTGGGCGTAAAGCGAGCGCAGGCGGTTCCTTAAGTCTGATGTGAAAGCCCCCGGCTCAACCGGGGGGGGG
ASV26111	530	-0.676151	TRUE	FALSE	Malawi (Rural)	d__Bacteria	Firmicutes	Lactobacillales	NA	NA	Human (USA/Malawi/Venezuela)	TACGTAGGTGGCAAGCGTTGTCCGGATTTATTGGGCGTAAAGCGAGCGCAGGCGGTTCCTTAAGTCTGATGTGAAAGCCCCCGGCTCAACCGGGGGGGGG
ASV26158	779	-0.0575348	TRUE	TRUE	USA (Urban)	d__Bacteria	Firmicutes	Oscillospirales	NA	NA	Human (USA/Malawi/Venezuela)	TACGTAGGGAGCGAGCGTTGTCCGGATTTACTGGGTGTAAAGGGTGCGTAGGCGGGATGGCAAGTCAGATGTGAAATACCGGGGCTTAACTCCGGGGCTG
ASV26158	813	0.0445002	TRUE	TRUE	USA (Urban)	d__Bacteria	Firmicutes	Oscillospirales	NA	NA	Human (USA/Malawi/Venezuela)	TACGTAGGGAGCGAGCGTTGTCCGGATTTACTGGGTGTAAAGGGTGCGTAGGCGGGATGGCAAGTCAGATGTGAAATACCGGGGCTTAACTCCGGGGCTG
ASV26295	741	-1.03802	TRUE	TRUE	Malawi (Rural)	d__Bacteria	Firmicutes	Clostridia_vadinBB60_group	Clostridia_vadinBB60_group	Clostridia_vadinBB60_group	Human (USA/Malawi/Venezuela)	TACGTAGGAGGCAAGCGTTATCCGGAATGACTGGGCGTAAAGGGTGCGTAGGTGGCTTGGCAAGTTGGTAGCGTAATTCCGAGGCTCAACCTCGGCGCTA
ASV26295	685	1.02531	TRUE	TRUE	Venezuela (Rural)	d__Bacteria	Firmicutes	Clostridia_vadinBB60_group	Clostridia_vadinBB60_group	Clostridia_vadinBB60_group	Human (USA/Malawi/Venezuela)	TACGTAGGAGGCAAGCGTTATCCGGAATGACTGGGCGTAAAGGGTGCGTAGGTGGCTTGGCAAGTTGGTAGCGTAATTCCGAGGCTCAACCTCGGCGCTA
ASV26367	456	0.199982	TRUE	FALSE	USA (Urban)	d__Bacteria	Firmicutes	Oscillospirales	Oscillospiraceae	NK4A214_group	Human (USA/Malawi/Venezuela)	TACGTAGGTGGCAAGCGTTGTCCGGATTTACTGGGTGTAAAGGGCGCGTAGGCGGAGAGACAAGTCAGATGTGAAATCTATGGGCTTAACCCATAAACTG
ASV26401	478	-0.0932651	TRUE	FALSE	USA (Urban)	d__Bacteria	Proteobacteria	Rhodospirillales	uncultured	uncultured	Human (USA/Malawi/Venezuela)	TACGAAGGGGGCGAGCGTTGTTCGGAATTACTGGGCGTAAAGGGTGTGTAGGTGGACGTGTAAGATAGCGGTGAAATGCCGGAGCTCAACTTCGGAATTG
ASV26447	815	-0.0962756	TRUE	TRUE	USA (Urban)	d__Bacteria	Firmicutes	Erysipelotrichales	Erysipelotrichaceae	Faecalitalea	Human (USA/Malawi/Venezuela)	TACGTAGGTGGCAAGCGTTATCCGGAATCATTGGGCGTAAAGGGTGCGTAGGTGGCACGATAAGTCTGAAGTAAAAGGCAACAGCTCAACTGTTGTATGC
ASV26447	845	0.0791141	TRUE	TRUE	USA (Urban)	d__Bacteria	Firmicutes	Erysipelotrichales	Erysipelotrichaceae	Faecalitalea	Human (USA/Malawi/Venezuela)	TACGTAGGTGGCAAGCGTTATCCGGAATCATTGGGCGTAAAGGGTGCGTAGGTGGCACGATAAGTCTGAAGTAAAAGGCAACAGCTCAACTGTTGTATGC
ASV26495	732	0.301664	TRUE	TRUE	USA (Urban)	d__Bacteria	Firmicutes	Peptostreptococcales-Tissierellales	Peptostreptococcales-Tissierellales	Anaerococcus	Human (USA/Malawi/Venezuela)	TACGTATGGACCGAGCGTTGTCCGGAATCATTGGGCGTAAAGGGTACGTAGGCGGCCTAGTAAGTTAGAAGTTAAAGAATATAGCTCAACTATATAAAGC
ASV26495	488	0.221624	TRUE	FALSE	Venezuela (Rural)	d__Bacteria	Firmicutes	Peptostreptococcales-Tissierellales	Peptostreptococcales-Tissierellales	Anaerococcus	Human (USA/Malawi/Venezuela)	TACGTATGGACCGAGCGTTGTCCGGAATCATTGGGCGTAAAGGGTACGTAGGCGGCCTAGTAAGTTAGAAGTTAAAGAATATAGCTCAACTATATAAAGC
ASV26564	719	0.211069	TRUE	TRUE	USA (Urban)	d__Bacteria	Firmicutes	Oscillospirales	Oscillospiraceae	UCG-005	Human (USA/Malawi/Venezuela)	TACGTAGGTGGCAAGCGTTGTCCGGATTTACTGGGTGTAAAGGGCGTGTAGGCGGAGCAGCAAGTCAGAAGTGAAATCTCTGGGCTCAACCCAGAAACTG
ASV26579	682	0.603795	TRUE	TRUE	Venezuela (Rural)	d__Bacteria	Firmicutes	Christensenellales	Christensenellaceae	Christensenellaceae_R-7_group	Human (USA/Malawi/Venezuela)	TACGTAGGGGGCGAGCGTTGTCCGGAATTACTGGGCGTAAAGGGCGCGCAGGCGGCCGATCAAGTTAGATGTGAAATACCCGGGCTTAACCTGGGAACTG
ASV26579	774	-0.910696	TRUE	TRUE	Malawi (Rural)	d__Bacteria	Firmicutes	Christensenellales	Christensenellaceae	Christensenellaceae_R-7_group	Human (USA/Malawi/Venezuela)	TACGTAGGGGGCGAGCGTTGTCCGGAATTACTGGGCGTAAAGGGCGCGCAGGCGGCCGATCAAGTTAGATGTGAAATACCCGGGCTTAACCTGGGAACTG
ASV26623	506	-0.610651	TRUE	FALSE	Malawi (Rural)	d__Bacteria	Actinobacteriota	Corynebacteriales	Corynebacteriaceae	Lawsonella	Human (USA/Malawi/Venezuela)	TACGTAGGGTGCGAGCGTTGTCCGGAATTACTGGGCGTAAAGAGCTCGTAGGCGGTTTGTCACGTCGTCTGTGAAATCCTAGGGCTTAACCCTGGACGTG
ASV26712	795	2.99367	TRUE	TRUE	USA (Urban)	d__Bacteria	Bacteroidota	Bacteroidales	Tannerellaceae	Parabacteroides	Human (USA/Malawi/Venezuela)	TACGGAGGATCCGAGCGTTATCCGGATTTATTGGGTTTAAAGGGTGCGTAGGCGGCCTTTTAAGTCAGCGGTGAAAGTCTGTGGCTCAACCATAGAATTG
ASV26712	737	-2.36086	TRUE	TRUE	USA (Urban)	d__Bacteria	Bacteroidota	Bacteroidales	Tannerellaceae	Parabacteroides	Human (USA/Malawi/Venezuela)	TACGGAGGATCCGAGCGTTATCCGGATTTATTGGGTTTAAAGGGTGCGTAGGCGGCCTTTTAAGTCAGCGGTGAAAGTCTGTGGCTCAACCATAGAATTG
ASV26821	659	-0.150449	TRUE	TRUE	Malawi (Rural)	d__Bacteria	Firmicutes	Clostridia_vadinBB60_group	Clostridia_vadinBB60_group	Clostridia_vadinBB60_group	Human (USA/Malawi/Venezuela)	TACGTAGGGGGCGAGCGTTGTCCGGAATTACTGGGCGTAAAGGGCGCGTAGGCGGCCAATTAAGTTAGATGTGAAATCCCCGGGCTTAACCTGGGTGTTG
ASV26821	594	0.141443	TRUE	FALSE	Venezuela (Rural)	d__Bacteria	Firmicutes	Clostridia_vadinBB60_group	Clostridia_vadinBB60_group	Clostridia_vadinBB60_group	Human (USA/Malawi/Venezuela)	TACGTAGGGGGCGAGCGTTGTCCGGAATTACTGGGCGTAAAGGGCGCGTAGGCGGCCAATTAAGTTAGATGTGAAATCCCCGGGCTTAACCTGGGTGTTG
ASV26852	746	-0.598031	TRUE	TRUE	USA (Urban)	d__Bacteria	Firmicutes	Oscillospirales	Ruminococcaceae	uncultured	Human (USA/Malawi/Venezuela)	TACGTAGGTGGCAAGCGTTGTCCGGAATTACTGGGTGTAAAGGGAGCGTAGGCGGGCAGGCAAGTCAGGCGTGAAATATATCGGCTCAACCGGTAACGGC
ASV26852	768	1.00289	TRUE	TRUE	USA (Urban)	d__Bacteria	Firmicutes	Oscillospirales	Ruminococcaceae	uncultured	Human (USA/Malawi/Venezuela)	TACGTAGGTGGCAAGCGTTGTCCGGAATTACTGGGTGTAAAGGGAGCGTAGGCGGGCAGGCAAGTCAGGCGTGAAATATATCGGCTCAACCGGTAACGGC
ASV26928	634	1.11739	TRUE	TRUE	USA (Urban)	d__Bacteria	Firmicutes	Lachnospirales	Lachnospiraceae	[Ruminococcus]_torques_group	Human (USA/Malawi/Venezuela)	TACGTATGGTGCAAGCGTTATCCGGATTTACTGGGTGTAAAGGGAGCGTAGACGGAGTGGCAAGTCTGATGTGAAAACCCGGGGCTCAACCCCGGGACTG
ASV26948	873	-2.93937	TRUE	TRUE	Malawi (Rural)	d__Bacteria	Bacteroidota	Bacteroidales	Prevotellaceae	Prevotella	Human (USA/Malawi/Venezuela)	TACGGAAGGTCCGGGCGTTATCCGGATTTATTGGGTTTAAAGGGAGCGTAGGCCGGAGATTAAGCGTGTTGTGAAATGTAGAGGCTCAACCTCTGCACTG
ASV26967	469	-0.023882	TRUE	FALSE	Malawi (Rural)	d__Bacteria	Firmicutes	Christensenellales	Christensenellaceae	Christensenellaceae_R-7_group	Human (USA/Malawi/Venezuela)	TACGTAGGGGGCGAGCGTTGTCCGGAATTACTGGGCGTAAAGGGTGCGTAGGCGGTTGCTTAAGTTGGATGTGAAATACCCGGGCTTAACTTGGGGGGTG
ASV26987	809	-0.0321638	TRUE	TRUE	USA (Urban)	d__Bacteria	Firmicutes	Oscillospirales	Ruminococcaceae	Negativibacillus	Human (USA/Malawi/Venezuela)	TACGTAGGTGGCAAGCGTTGTCCGGAATTACTGGGTGTAAAGGGAGCGTAGGCGGGGAGACAAGTTGAATGTTTAAACTATCGGCTTAACTGATAGTCGC
ASV27023	753	0.0552977	TRUE	TRUE	Venezuela (Rural)	d__Bacteria	Firmicutes	Oscillospirales	[Eubacterium]_coprostanoligenes_group	[Eubacterium]_coprostanoligenes_group	Human (USA/Malawi/Venezuela)	TACGTAGGTGGCAAGCGTTATCCGGAATTACTGGGTGTAAAGGGAGCGCAGGCGGGATAGCAAGTCAGCGGTGAAATGCATGGGCTTAACTCATGAGCTG
ASV27023	759	-0.482389	TRUE	TRUE	Malawi (Rural)	d__Bacteria	Firmicutes	Oscillospirales	[Eubacterium]_coprostanoligenes_group	[Eubacterium]_coprostanoligenes_group	Human (USA/Malawi/Venezuela)	TACGTAGGTGGCAAGCGTTATCCGGAATTACTGGGTGTAAAGGGAGCGCAGGCGGGATAGCAAGTCAGCGGTGAAATGCATGGGCTTAACTCATGAGCTG
ASV27052	518	-0.937206	TRUE	FALSE	Malawi (Rural)	d__Bacteria	Firmicutes	Oscillospirales	Ruminococcaceae	NA	Human (USA/Malawi/Venezuela)	TACGTAGGTGGCAAGCGTTGTCCGGAATTACTGGGTGTAAAGGGAGCGTAGGCGGTCTTGCAAGTTGAATGTTTAAACTATCGGCTTAACTGGTAGTCGC
ASV2710	483	-0.62288	TRUE	FALSE	Malawi (Rural)	d__Bacteria	Bacteroidota	Bacteroidales	Porphyromonadaceae	Porphyromonas	Human (USA/Malawi/Venezuela)	TACGGAGGATACGAGCGTTATCCGGAATTATTGGGTTTAAAGGGTGCGTAGGTGGCTATTTAAGTCAGGGGTGAAAAGCATGAGCTCAACTCATGTCTTG
ASV27160	840	2.04696	TRUE	TRUE	Venezuela (Rural)	d__Bacteria	Bacteroidota	Bacteroidales	Prevotellaceae	Prevotella	Human (USA/Malawi/Venezuela)	TACGGAAGGTCCGGGCGTTATCCGGATTTATTGGGTTTAAAGGGAGCGTAGGCCGTCTTATAAGCGTGTTGTGAAATGTCGGGGCTCAACCTGGGCATTG
ASV27163	452	0.322378	TRUE	FALSE	USA (Urban)	d__Bacteria	Firmicutes	Oscillospirales	Oscillospiraceae	UCG-005	Human (USA/Malawi/Venezuela)	TACGTAGGTGGCAAGCGTTGTCCGGATTTACTGGGTGTAAAGGGCGTGTAGGCGGAGCTGCAAGTCAGATGTGAAATCTCTGGGCTCAACCCAGAAACTG
ASV2718	536	-0.230857	TRUE	FALSE	Malawi (Rural)	d__Bacteria	Bacteroidota	Bacteroidales	Prevotellaceae	Prevotella	Human (USA/Malawi/Venezuela)	TACGGAAGGTCCGGGTGTTATCCGGATTTATTGGGTTTAAAGGGAGCGCAGACTGCCTGTCAAGCGTGCAGTGAAACGCCGCGGCCCAACCGCGGCCCTG
ASV27204	787	1.09483	TRUE	TRUE	USA (Urban)	d__Bacteria	Firmicutes	Oscillospirales	Butyricicoccaceae	NA	Human (USA/Malawi/Venezuela)	TACGTAGGGAGCAAGCGTTATCCGGATTTACTGGGTGTAAAGGGCGAGTAGGCGGGCTGGTAAGTTGGAAGTGAAATCTAGGGGCTTAACCCCTAAACTG
ASV27204	776	-0.486731	TRUE	TRUE	USA (Urban)	d__Bacteria	Firmicutes	Oscillospirales	Butyricicoccaceae	NA	Human (USA/Malawi/Venezuela)	TACGTAGGGAGCAAGCGTTATCCGGATTTACTGGGTGTAAAGGGCGAGTAGGCGGGCTGGTAAGTTGGAAGTGAAATCTAGGGGCTTAACCCCTAAACTG
ASV27207	537	0.0632927	TRUE	FALSE	Venezuela (Rural)	d__Bacteria	Firmicutes	Clostridiales	Clostridiaceae	Clostridium_sensu_stricto_1	Human (USA/Malawi/Venezuela)	TACGTAGGTGGCGAGCGTTGTCCGGATTTACTGGGCGTAAAGGGAGCGTAGGCGGACTTTTAAGTGAGATGTGAAATACCCAGGCTCAACCTGGGGGCTG
ASV2728	796	0.952853	TRUE	TRUE	USA (Urban)	d__Bacteria	Firmicutes	Peptostreptococcales-Tissierellales	Anaerovoracaceae	Family_XIII_AD3011_group	Human (USA/Malawi/Venezuela)	TACGTAGGGGGCAAGCGTTATCCGGAATTATTGGGCGTAAAGAGTACGTAGGTGGTTACCTAAGCACGGGGTATAAGGCAATGGCTCAACCATTGTTTGC
ASV2728	787	0.163637	TRUE	TRUE	Venezuela (Rural)	d__Bacteria	Firmicutes	Peptostreptococcales-Tissierellales	Anaerovoracaceae	Family_XIII_AD3011_group	Human (USA/Malawi/Venezuela)	TACGTAGGGGGCAAGCGTTATCCGGAATTATTGGGCGTAAAGAGTACGTAGGTGGTTACCTAAGCACGGGGTATAAGGCAATGGCTCAACCATTGTTTGC
ASV27347	521	0.225769	TRUE	FALSE	USA (Urban)	d__Bacteria	Firmicutes	Erysipelotrichales	Erysipelatoclostridiaceae	Erysipelatoclostridium	Human (USA/Malawi/Venezuela)	TACGTAGGTGGCAAGCGTTATCCGGAATTATTGGGCGTAAAGAGGGAGCAGGCGGCAGCAAGGGTCTGTGGTGAAAGCCTGAAGCTTAACTTCAGTAAGC
ASV27354	484	0.309898	TRUE	FALSE	Venezuela (Rural)	d__Bacteria	Firmicutes	Peptostreptococcales-Tissierellales	Peptostreptococcales-Tissierellales	Anaerococcus	Human (USA/Malawi/Venezuela)	TACGTAAGGTCCGAGCGTTGTCCGGAATCATTGGGCGTAAAGGGTACGTAGGCGGATAAGCAAGTTAGAAGTGAAATCCTATAGCTCAACTATAGTAAGC
ASV27354	755	0.325459	TRUE	TRUE	USA (Urban)	d__Bacteria	Firmicutes	Peptostreptococcales-Tissierellales	Peptostreptococcales-Tissierellales	Anaerococcus	Human (USA/Malawi/Venezuela)	TACGTAAGGTCCGAGCGTTGTCCGGAATCATTGGGCGTAAAGGGTACGTAGGCGGATAAGCAAGTTAGAAGTGAAATCCTATAGCTCAACTATAGTAAGC
ASV27387	785	1.20096	TRUE	TRUE	Venezuela (Rural)	d__Bacteria	Bacteroidota	Bacteroidales	Prevotellaceae	Prevotella	Human (USA/Malawi/Venezuela)	TACGGAAGGTCCGGGCGTTATCCGGATTTATTGGGTTTAAAGGGAGCGTAGGCCGTGAGGTAAGCGTGTTGTGAAATGTAGGCGCCCAACGTCTGCACTG
ASV27387	725	-0.776601	TRUE	TRUE	Malawi (Rural)	d__Bacteria	Bacteroidota	Bacteroidales	Prevotellaceae	Prevotella	Human (USA/Malawi/Venezuela)	TACGGAAGGTCCGGGCGTTATCCGGATTTATTGGGTTTAAAGGGAGCGTAGGCCGTGAGGTAAGCGTGTTGTGAAATGTAGGCGCCCAACGTCTGCACTG
ASV27392	489	-0.135755	TRUE	FALSE	Malawi (Rural)	d__Bacteria	Firmicutes	Oscillospirales	Oscillospiraceae	Oscillibacter	Human (USA/Malawi/Venezuela)	TACGTAGGTGGCAAGCGTTGTCCGGATTTACTGGGTGTAAAGGGCGTGTAGCCGGGTCGGCAAGTCAGATGTGAAATCTGGAGGCTCAACCTCCAAACTG
ASV27450	791	1.30924	TRUE	TRUE	USA (Urban)	d__Bacteria	Campilobacterota	Campylobacterales	Campylobacteraceae	Campylobacter	Human (USA/Malawi/Venezuela)	TACGGAGGGTGCAAGCGTTACTCGGAATCACTGGGCGTAAAGGACGCGTAGGCGGATTATCAAGTCTCTTGTGAAATCCTATGGCTTAACCATAGAACTG
ASV27566	791	0.269432	TRUE	TRUE	USA (Urban)	d__Bacteria	Firmicutes	Christensenellales	Christensenellaceae	Christensenellaceae_R-7_group	Human (USA/Malawi/Venezuela)	TACGTAGGGGGCGAGCGTTGTCCGGAATGACTGGGCGTAAAGGGCGTGTAGGCGGCAGTATAAGTCCGGAGTGAAAGTCCTGCTTTCAAGGTGGGAATTG
ASV27649	625	-0.525633	TRUE	TRUE	USA (Urban)	d__Bacteria	Firmicutes	Oscillospirales	Oscillospiraceae	Colidextribacter	Human (USA/Malawi/Venezuela)	TACGTAGGGAGCAAGCGTTATCCGGATTTACTGGGTGTAAAGGGCGTGTAGGCGGGACAGCAAGTCAGATGTGAAAACTATGGGCTCAACCCATAGCCTG
ASV27649	690	0.515216	TRUE	TRUE	USA (Urban)	d__Bacteria	Firmicutes	Oscillospirales	Oscillospiraceae	Colidextribacter	Human (USA/Malawi/Venezuela)	TACGTAGGGAGCAAGCGTTATCCGGATTTACTGGGTGTAAAGGGCGTGTAGGCGGGACAGCAAGTCAGATGTGAAAACTATGGGCTCAACCCATAGCCTG
ASV2765	516	-0.942505	TRUE	FALSE	Malawi (Rural)	d__Bacteria	Verrucomicrobiota	Verrucomicrobiales	Akkermansiaceae	Akkermansia	Human (USA/Malawi/Venezuela)	TACAGAGGTCTCAAGCGTTGTTCGGAATCACTGGGCGTAAAGCGTGCGTAGGCTGTTTCGTAAGTCGTGTGTGAAAGGCGCAGGCTCAACCCGCGGACGG
ASV27667	714	0.29403	TRUE	TRUE	Venezuela (Rural)	d__Bacteria	Firmicutes	Lachnospirales	Lachnospiraceae	Coprococcus	Human (USA/Malawi/Venezuela)	TACGTATGGTGCAAGCGTTATCCGGATTTACTGGGTGTAAAGGGTGCGTAGGTGGTGAGACAAGTCTGAAGTGAAAATCCGGGGCTTAACCCCGGAACTG
ASV27667	716	-0.101421	TRUE	TRUE	Malawi (Rural)	d__Bacteria	Firmicutes	Lachnospirales	Lachnospiraceae	Coprococcus	Human (USA/Malawi/Venezuela)	TACGTATGGTGCAAGCGTTATCCGGATTTACTGGGTGTAAAGGGTGCGTAGGTGGTGAGACAAGTCTGAAGTGAAAATCCGGGGCTTAACCCCGGAACTG
ASV27678	508	-0.55551	TRUE	FALSE	Malawi (Rural)	d__Bacteria	Actinobacteriota	Actinomycetales	Actinomycetaceae	Varibaculum	Human (USA/Malawi/Venezuela)	TACGTAGGGCGCGAGCGTTGTCCGGAATTATTGGGCGTAAAGGGCTTGTAGGTGGCTGGTTGCGTCTGTCGTGAAAGCTCATGGCTTAACTGTGGGTTTG
ASV27719	490	0.114986	TRUE	FALSE	USA (Urban)	d__Bacteria	Firmicutes	Lachnospirales	Lachnospiraceae	Eisenbergiella	Human (USA/Malawi/Venezuela)	TACGTAGGGGGCAAGCGTTATCCGGATTTACTGGGTGTAAAGGGAGCGTAGACGGCATGGCAAGCCAGATGTGAAAACCCAGGGCTCAACCTTGGGATTG
ASV27745	484	-0.262204	TRUE	FALSE	Malawi (Rural)	d__Bacteria	Firmicutes	Oscillospirales	Ruminococcaceae	uncultured	Human (USA/Malawi/Venezuela)	TACGTAGGGAGCGAGCGTTGTCCGGAATTACTGGGTGTAAAGGGTGCGTAGGCGGGATAGCAAGTCAGGCGTGAAATCCATCGGCTTAACTGATGAACTG
ASV27787	462	0.16161	TRUE	FALSE	USA (Urban)	d__Bacteria	Firmicutes	Peptostreptococcales-Tissierellales	Peptostreptococcales-Tissierellales	Peptoniphilus	Human (USA/Malawi/Venezuela)	TACGTAGGGGGCTAGCGTTGTCCGGAATCACTGGGCGTAAAGGGTTCGCAGGCGGAATAACAAGTCAGATGTGAAAGGCATGGGCTCAACCCATGTAAGC
ASV28026	541	0.543884	TRUE	FALSE	USA (Urban)	d__Bacteria	Firmicutes	Oscillospirales	Ruminococcaceae	Ruminococcus	Human (USA/Malawi/Venezuela)	TACGTAGGGAGCGAGCGTTGTCCGGAATTACTGGGTGTAAAGGGAGCGTAGGCGGGACGGCAAGTCAGATGTGAAAACTATGGGCTCAACCCATAGACTG
ASV28120	754	-0.379706	TRUE	TRUE	USA (Urban)	d__Bacteria	Firmicutes	Oscillospirales	Oscillospiraceae	Oscillibacter	Human (USA/Malawi/Venezuela)	TACGTAGGTGGCAAGCGTTGTCCGGATTTACTGGGTGTAAAGGGCGTGTAGCCGGGGAGACAAGTCAGATGTGAAATCTGGAGGCTCAACCTCCAAACTG
ASV28120	812	-0.141404	TRUE	TRUE	Malawi (Rural)	d__Bacteria	Firmicutes	Oscillospirales	Oscillospiraceae	Oscillibacter	Human (USA/Malawi/Venezuela)	TACGTAGGTGGCAAGCGTTGTCCGGATTTACTGGGTGTAAAGGGCGTGTAGCCGGGGAGACAAGTCAGATGTGAAATCTGGAGGCTCAACCTCCAAACTG
ASV28182	850	-1.75689	TRUE	TRUE	Malawi (Rural)	d__Bacteria	Firmicutes	Oscillospirales	Ruminococcaceae	Ruminococcus	Human (USA/Malawi/Venezuela)	TACGTAGGGAGCAAGCGTTATCCGGATTTACTGGGTGTAAAGGGTGCGTAGGCGGCTTGGTAAGTCAGATGTGAAATGTATGGGCTCAACCCATGCACTG
ASV28258	596	-0.0650786	TRUE	FALSE	Malawi (Rural)	d__Bacteria	Firmicutes	Lactobacillales	Streptococcaceae	Streptococcus	Human (USA/Malawi/Venezuela)	TACGTAGGTCCCGAGCGTTGTCCGGATTTATTGGGCGTAAAGCGAGCGCAGGCGGTTAGAAAAGTCTGAAGTGAAAGGCAGTGGCTCAACCATTGTAGGC
ASV28258	695	-0.354438	TRUE	TRUE	USA (Urban)	d__Bacteria	Firmicutes	Lactobacillales	Streptococcaceae	Streptococcus	Human (USA/Malawi/Venezuela)	TACGTAGGTCCCGAGCGTTGTCCGGATTTATTGGGCGTAAAGCGAGCGCAGGCGGTTAGAAAAGTCTGAAGTGAAAGGCAGTGGCTCAACCATTGTAGGC
ASV2826	432	0.177296	TRUE	FALSE	Venezuela (Rural)	d__Bacteria	Firmicutes	Peptostreptococcales-Tissierellales	Peptostreptococcales-Tissierellales	Anaerococcus	Human (USA/Malawi/Venezuela)	TACGTAAGGTCCGAGCGTTGTCCGGAATCATTGGGCGTAAAGGGTACGTAGGCGGGTAAGCAAGTTAGAAGTGAAATCCTATAGCTCAACTATAGTAAGC
ASV2826	736	0.388871	TRUE	TRUE	USA (Urban)	d__Bacteria	Firmicutes	Peptostreptococcales-Tissierellales	Peptostreptococcales-Tissierellales	Anaerococcus	Human (USA/Malawi/Venezuela)	TACGTAAGGTCCGAGCGTTGTCCGGAATCATTGGGCGTAAAGGGTACGTAGGCGGGTAAGCAAGTTAGAAGTGAAATCCTATAGCTCAACTATAGTAAGC
ASV28380	786	0.654902	TRUE	TRUE	USA (Urban)	d__Bacteria	Firmicutes	Clostridia_vadinBB60_group	Clostridia_vadinBB60_group	Clostridia_vadinBB60_group	Human (USA/Malawi/Venezuela)	TACGTAGGATGCAAGCGTTATCCGGAATGACTGGGCGTAAAGGGTGCGTAGGCGGTAAATCAAGTTGGCAGCGTAATTCCGGGGCTTAACCGCGGAACTA
ASV2839	572	-0.01807	TRUE	FALSE	Malawi (Rural)	d__Bacteria	Firmicutes	Lactobacillales	Streptococcaceae	Streptococcus	Human (USA/Malawi/Venezuela)	TACGTAGGTCCCGAGCGTTGTCCGGATTTATTGGGCGTAAAGCGAGCGCAGGCGGTTTGATAAGTCTGAAGTTAAAGGCTGTGGCTCAACCATAGTTCGC
ASV2839	773	-2.26628	TRUE	TRUE	USA (Urban)	d__Bacteria	Firmicutes	Lactobacillales	Streptococcaceae	Streptococcus	Human (USA/Malawi/Venezuela)	TACGTAGGTCCCGAGCGTTGTCCGGATTTATTGGGCGTAAAGCGAGCGCAGGCGGTTTGATAAGTCTGAAGTTAAAGGCTGTGGCTCAACCATAGTTCGC
ASV28403	490	-0.335056	TRUE	FALSE	Malawi (Rural)	d__Bacteria	Firmicutes	Izemoplasmatales	Izemoplasmatales	Izemoplasmatales	Human (USA/Malawi/Venezuela)	TACATAGGGGGCAAGCGTTATCCGGAATTATTGGGCGTAAAGCGTGCGTAGGCGGCCACTTAAGTCTGTCGTGAAAGCCCACAGCTTAACTGTGGAGGGG
ASV28408	489	-0.380292	TRUE	FALSE	Malawi (Rural)	d__Bacteria	Firmicutes	Oscillospirales	Ruminococcaceae	Anaerofilum	Human (USA/Malawi/Venezuela)	AACGTAGGTGGCAAGCGTTGTCCGGAATTACTGGGTGTAAAGGGAGCGCAGGCGGAACTGCAAGTTGGGTGTCAAATCTACGGGCTTAACCCGTATCCGC
ASV28413	786	0.597789	TRUE	TRUE	USA (Urban)	d__Bacteria	Verrucomicrobiota	Victivallales	Victivallaceae	Victivallis	Human (USA/Malawi/Venezuela)	TACGTAGGTGGCGAGCGTTGTTCGGATTTATTGGGCGTAAAGGGTCTGTAGGAGGTTTGTTAAATACGAGGTGAAATCCGGGGGCTCAACTTCCGAATTG
ASV28413	772	-0.35059	TRUE	TRUE	USA (Urban)	d__Bacteria	Verrucomicrobiota	Victivallales	Victivallaceae	Victivallis	Human (USA/Malawi/Venezuela)	TACGTAGGTGGCGAGCGTTGTTCGGATTTATTGGGCGTAAAGGGTCTGTAGGAGGTTTGTTAAATACGAGGTGAAATCCGGGGGCTCAACTTCCGAATTG
ASV2842	452	0.0742924	TRUE	FALSE	Venezuela (Rural)	d__Bacteria	Actinobacteriota	Actinomycetales	Actinomycetaceae	Actinomyces	Human (USA/Malawi/Venezuela)	TACGTAGGGCGCAAGCGTTGTCCGGAATTATTGGGCGTAAAGAGCTCGTAGGCGGCTGGTCGCGTCTGTCGTGAAAACTTCCGGCTCAACCGGGGGCTTG
ASV2842	477	-0.413927	TRUE	FALSE	Malawi (Rural)	d__Bacteria	Actinobacteriota	Actinomycetales	Actinomycetaceae	Actinomyces	Human (USA/Malawi/Venezuela)	TACGTAGGGCGCAAGCGTTGTCCGGAATTATTGGGCGTAAAGAGCTCGTAGGCGGCTGGTCGCGTCTGTCGTGAAAACTTCCGGCTCAACCGGGGGCTTG
ASV28469	791	1.46732	TRUE	TRUE	USA (Urban)	d__Bacteria	Fusobacteriota	Fusobacteriales	Fusobacteriaceae	Fusobacterium	Human (USA/Malawi/Venezuela)	TACGTATGTCACAAGCGTTATCCGGATTTATTGGGCGTAAAGCGCGTCTAGGTGGTTATGTAAGTCTGATGTGAAAATGCAGGGCTCAACTCTGTATTGC
ASV28469	763	-1.07283	TRUE	TRUE	USA (Urban)	d__Bacteria	Fusobacteriota	Fusobacteriales	Fusobacteriaceae	Fusobacterium	Human (USA/Malawi/Venezuela)	TACGTATGTCACAAGCGTTATCCGGATTTATTGGGCGTAAAGCGCGTCTAGGTGGTTATGTAAGTCTGATGTGAAAATGCAGGGCTCAACTCTGTATTGC
ASV2855	706	-0.395083	TRUE	TRUE	USA (Urban)	d__Bacteria	Firmicutes	Oscillospirales	Oscillospiraceae	UCG-003	Human (USA/Malawi/Venezuela)	TACGTAGGTGGCAAGCGTTGTCCGGATTTACTGGGTGTAAAGGGCGTGCAGCCGGGTGCGCAAGTCAGATGTGAAATCTCAGGGCTCAACCCTGAAACTG
ASV2855	732	0.628173	TRUE	TRUE	USA (Urban)	d__Bacteria	Firmicutes	Oscillospirales	Oscillospiraceae	UCG-003	Human (USA/Malawi/Venezuela)	TACGTAGGTGGCAAGCGTTGTCCGGATTTACTGGGTGTAAAGGGCGTGCAGCCGGGTGCGCAAGTCAGATGTGAAATCTCAGGGCTCAACCCTGAAACTG
ASV28631	701	0.829364	TRUE	TRUE	Venezuela (Rural)	d__Bacteria	Firmicutes	Oscillospirales	Ruminococcaceae	CAG-352	Human (USA/Malawi/Venezuela)	TACGTAGGGAGCAAGCGTTGTCCGGATTTACTGGGTGTAAAGGGTGCGTAGGCGGCTTTGCAAGTCAGATGTGAAATCTATGGGCTCAACCCATAGCCTG
ASV28631	732	-0.841213	TRUE	TRUE	Malawi (Rural)	d__Bacteria	Firmicutes	Oscillospirales	Ruminococcaceae	CAG-352	Human (USA/Malawi/Venezuela)	TACGTAGGGAGCAAGCGTTGTCCGGATTTACTGGGTGTAAAGGGTGCGTAGGCGGCTTTGCAAGTCAGATGTGAAATCTATGGGCTCAACCCATAGCCTG
ASV28664	706	0.274432	TRUE	TRUE	USA (Urban)	d__Bacteria	Firmicutes	Veillonellales-Selenomonadales	Selenomonadaceae	Megamonas	Human (USA/Malawi/Venezuela)	TACGTAGGCGGCAAGCGTTGTCCGGAATTATTGGGCGTAAAGGGAGCGCAGGCGGGAAACTAAGCGGATCTTAAAAGTGCGGGGCTCAACCCCGTGATGG
ASV28688	810	-0.231489	TRUE	TRUE	Malawi (Rural)	d__Bacteria	Firmicutes	Christensenellales	Christensenellaceae	uncultured	Human (USA/Malawi/Venezuela)	TACGTAGGGAGCGAGCGTTGTCCGGAATTACTGGGCGTAAAGGGTGCGTAGGCGGTTTGGTAAGTCAGATGTGAAATACCCGGGCTTAACCCGGGGGCTG
ASV28688	696	-0.83641	TRUE	TRUE	USA (Urban)	d__Bacteria	Firmicutes	Christensenellales	Christensenellaceae	uncultured	Human (USA/Malawi/Venezuela)	TACGTAGGGAGCGAGCGTTGTCCGGAATTACTGGGCGTAAAGGGTGCGTAGGCGGTTTGGTAAGTCAGATGTGAAATACCCGGGCTTAACCCGGGGGCTG
ASV28708	519	-0.497361	TRUE	FALSE	Malawi (Rural)	d__Bacteria	Firmicutes	Lachnospirales	Lachnospiraceae	Fusicatenibacter	Human (USA/Malawi/Venezuela)	TACGTAGGGGGCAAGCGTTATCCGGATTTACTGGGTGTAAAGGGAGCGTAGACGGCAAGGCAAGTCTGATGTGAAAACCCAGGGCTTAACCCTGGACTGC
ASV28743	455	0.295721	TRUE	FALSE	USA (Urban)	d__Bacteria	Firmicutes	Lachnospirales	Lachnospiraceae	[Ruminococcus]_torques_group	Human (USA/Malawi/Venezuela)	TACGTAGGGGGCAAGCGTTATCCGGATTTACTGGGTGTAAAGGGAGCGTAGACGGAGCAGCAAGTCTGATGTGAAAACCCGGGGCTCAACCCCGGGACTG
ASV28748	759	-0.49094	TRUE	TRUE	Malawi (Rural)	d__Bacteria	Firmicutes	Veillonellales-Selenomonadales	Selenomonadaceae	Mitsuokella	Human (USA/Malawi/Venezuela)	TACGTAGGTGGCGAGCGTTGTCCGGAATTATTGGGCGTAAAGGGAGCGCAGGCGGGAGATCAAGTCTATCTTAAAAGTGCGGGGCTCAACCCCGTGAGGG
ASV28748	446	0.78792	TRUE	FALSE	Venezuela (Rural)	d__Bacteria	Firmicutes	Veillonellales-Selenomonadales	Selenomonadaceae	Mitsuokella	Human (USA/Malawi/Venezuela)	TACGTAGGTGGCGAGCGTTGTCCGGAATTATTGGGCGTAAAGGGAGCGCAGGCGGGAGATCAAGTCTATCTTAAAAGTGCGGGGCTCAACCCCGTGAGGG
ASV28859	432	0.227536	TRUE	FALSE	Venezuela (Rural)	d__Bacteria	Firmicutes	Oscillospirales	Butyricicoccaceae	Butyricicoccus	Human (USA/Malawi/Venezuela)	TACGTAGGGAGCAAGCGTTATCCGGATTTACTGGGTGTAAAGGGCGAGTAGGCGGGCTGGTAAGTTGGAAGTGAAATCCCGGGGCTTAACCCCGGAACTG
ASV28869	683	-0.498535	TRUE	TRUE	USA (Urban)	d__Bacteria	Firmicutes	Oscillospirales	Ruminococcaceae	uncultured	Human (USA/Malawi/Venezuela)	TACGTAGGGAGCGAGCGTTGTCCGGAATTACTGGGTGTAAAGGGAGCGTAGGCGGGAAAGCAAGTTGGAAGTGAAATGCATGGGCTTAACCCATGAGCTG
ASV28869	772	0.499434	TRUE	TRUE	USA (Urban)	d__Bacteria	Firmicutes	Oscillospirales	Ruminococcaceae	uncultured	Human (USA/Malawi/Venezuela)	TACGTAGGGAGCGAGCGTTGTCCGGAATTACTGGGTGTAAAGGGAGCGTAGGCGGGAAAGCAAGTTGGAAGTGAAATGCATGGGCTTAACCCATGAGCTG
ASV28876	594	-1.38529	TRUE	FALSE	USA (Urban)	d__Bacteria	Bacteroidota	Bacteroidales	Rikenellaceae	Alistipes	Human (USA/Malawi/Venezuela)	TACGGAGGATCCAAGCGTTATCCGGATTTATTGGGTTTAAAGGGTGCGTAGGCGGTTTAGTAAGTCAGCGGTGAAATTTTGGTGCTTAACACCAAACGTG
ASV28876	802	0.927724	TRUE	TRUE	USA (Urban)	d__Bacteria	Bacteroidota	Bacteroidales	Rikenellaceae	Alistipes	Human (USA/Malawi/Venezuela)	TACGGAGGATCCAAGCGTTATCCGGATTTATTGGGTTTAAAGGGTGCGTAGGCGGTTTAGTAAGTCAGCGGTGAAATTTTGGTGCTTAACACCAAACGTG
ASV28903	780	0.752434	TRUE	TRUE	USA (Urban)	d__Bacteria	Actinobacteriota	Coriobacteriales	Atopobiaceae	Coriobacteriaceae_UCG-003	Human (USA/Malawi/Venezuela)	TACGTAGGGGGCGAGCGTTATCCGGATTCATTGGGCGTAAAGCGCTCGTAGGCGGCCCGTCTGGTCGGGAGTCAAAGCCCGGGGCTCAACCCCGGCCCGC
ASV28973	526	0.140583	TRUE	FALSE	USA (Urban)	d__Bacteria	Firmicutes	Monoglobales	Monoglobaceae	Monoglobus	Human (USA/Malawi/Venezuela)	TACGTAGGTGCCAAGCGTTGTCCGGATTTACTGGGTGTAAAGGGCGCGTAGGCGGACTGTCAAGTCAGTCGTGAAATACCGGGGCTTAACCCCGGGGCTG
ASV28982	833	1.05181	TRUE	TRUE	Venezuela (Rural)	d__Bacteria	Firmicutes	Erysipelotrichales	Erysipelotrichaceae	Erysipelotrichaceae_UCG-006	Human (USA/Malawi/Venezuela)	TACGTAGGTGGCGAGCGTTATCCGGAATTATTGGGCGTAAAGGGTGCGTAGGCGGCCTTTTAAGTTTGTGGTGAAAGCGTGGGGCTCAACCCCATACAGC
ASV28982	825	-0.461324	TRUE	TRUE	Malawi (Rural)	d__Bacteria	Firmicutes	Erysipelotrichales	Erysipelotrichaceae	Erysipelotrichaceae_UCG-006	Human (USA/Malawi/Venezuela)	TACGTAGGTGGCGAGCGTTATCCGGAATTATTGGGCGTAAAGGGTGCGTAGGCGGCCTTTTAAGTTTGTGGTGAAAGCGTGGGGCTCAACCCCATACAGC
ASV29014	796	0.231352	TRUE	TRUE	USA (Urban)	d__Bacteria	Firmicutes	Acholeplasmatales	Acholeplasmataceae	Anaeroplasma	Human (USA/Malawi/Venezuela)	TACGTAGGGAGCGAGCGTTATCCGGAATTATTGGGCGTAAAGGGTGCGTAGATGGCACATTAAGTTTTCTGTAAAAATGCTAGGCTCAACCTAGTAGGGC
ASV29068	505	-0.254923	TRUE	FALSE	Malawi (Rural)	d__Bacteria	Firmicutes	Oscillospirales	Oscillospiraceae	NA	Human (USA/Malawi/Venezuela)	TACGTAGGGAGCGAGCGTTGTCCGGATTTACTGGGTGTAAAGGGCGTGTAGGCGGAGCTGCAAGTCAGATGTGAAATCTGGGGGCTTAACCCCCAAACTG
ASV29146	802	0.130873	TRUE	TRUE	USA (Urban)	d__Bacteria	Firmicutes	Oscillospirales	Butyricicoccaceae	UCG-009	Human (USA/Malawi/Venezuela)	TACGTAGGTGGCAAGCGTTGTCCGGATTTACTGGGTGTAAAGGGCGAGTAGGCGGGATATCAAGTCAGGTGTGAAATCCATGGGCTCAACCCATGAACTG
ASV29146	804	0.223586	TRUE	TRUE	Venezuela (Rural)	d__Bacteria	Firmicutes	Oscillospirales	Butyricicoccaceae	UCG-009	Human (USA/Malawi/Venezuela)	TACGTAGGTGGCAAGCGTTGTCCGGATTTACTGGGTGTAAAGGGCGAGTAGGCGGGATATCAAGTCAGGTGTGAAATCCATGGGCTCAACCCATGAACTG
ASV29193	696	1.00783	TRUE	TRUE	Venezuela (Rural)	d__Bacteria	Firmicutes	Oscillospirales	Ruminococcaceae	NA	Human (USA/Malawi/Venezuela)	TACGTAGGGAGCAAGCGTTGTCCGGAATTACTGGGTGTAAAGGGTGCGTAGGCGGGCTTGCAAGTCAGCCGTGAAATCCCGGGGCTTAACCCCGCGGACT
ASV29193	768	-1.10865	TRUE	TRUE	Malawi (Rural)	d__Bacteria	Firmicutes	Oscillospirales	Ruminococcaceae	NA	Human (USA/Malawi/Venezuela)	TACGTAGGGAGCAAGCGTTGTCCGGAATTACTGGGTGTAAAGGGTGCGTAGGCGGGCTTGCAAGTCAGCCGTGAAATCCCGGGGCTTAACCCCGCGGACT
ASV29211	834	-1.52667	TRUE	TRUE	USA (Urban)	d__Bacteria	Firmicutes	Oscillospirales	Ruminococcaceae	Incertae_Sedis	Human (USA/Malawi/Venezuela)	TACGTAGGGAGCGAGCGTTGTCCGGATTTACTGGGTGTAAAGGGTGCGTAGGCGGCGAGGCAAGTCAGGCGTGAAATCTATGGGCTTAACCCATAAACTG
ASV29211	860	1.50883	TRUE	TRUE	USA (Urban)	d__Bacteria	Firmicutes	Oscillospirales	Ruminococcaceae	Incertae_Sedis	Human (USA/Malawi/Venezuela)	TACGTAGGGAGCGAGCGTTGTCCGGATTTACTGGGTGTAAAGGGTGCGTAGGCGGCGAGGCAAGTCAGGCGTGAAATCTATGGGCTTAACCCATAAACTG
ASV29226	779	-1.73791	TRUE	TRUE	USA (Urban)	d__Bacteria	Firmicutes	Oscillospirales	Ruminococcaceae	uncultured	Human (USA/Malawi/Venezuela)	TACGTAGGTGGCAAGCGTTGTCCGGAATTACTGGGTGTAAAGGGAGCGTAGGCGGGAAGGCAAGTTGATTGTCTAAACTATCGGCTCAACCGATAGTCGC
ASV29226	815	0.876488	TRUE	TRUE	USA (Urban)	d__Bacteria	Firmicutes	Oscillospirales	Ruminococcaceae	uncultured	Human (USA/Malawi/Venezuela)	TACGTAGGTGGCAAGCGTTGTCCGGAATTACTGGGTGTAAAGGGAGCGTAGGCGGGAAGGCAAGTTGATTGTCTAAACTATCGGCTCAACCGATAGTCGC
ASV2924	482	0.266805	TRUE	FALSE	Venezuela (Rural)	d__Bacteria	Firmicutes	Oscillospirales	Ruminococcaceae	NA	Human (USA/Malawi/Venezuela)	TACGTAGGGAGCGAGCGTTGTCCGGAATTACTGGGTGTAAAGGGAGCGTAGGCGGGATGGTAAGTAGAATGTGAAATCGATCGGCTCAACCGGTCGCTGC
ASV2924	564	-0.498103	TRUE	FALSE	Malawi (Rural)	d__Bacteria	Firmicutes	Oscillospirales	Ruminococcaceae	NA	Human (USA/Malawi/Venezuela)	TACGTAGGGAGCGAGCGTTGTCCGGAATTACTGGGTGTAAAGGGAGCGTAGGCGGGATGGTAAGTAGAATGTGAAATCGATCGGCTCAACCGGTCGCTGC
ASV29241	493	-0.0257353	TRUE	FALSE	Malawi (Rural)	d__Bacteria	Firmicutes	Oscillospirales	Ruminococcaceae	Negativibacillus	Human (USA/Malawi/Venezuela)	TACGTAGGTGGCAAGCGTTGTCCGGAATTACTGGGTGTAAAGGGAGCGTAGGCGGGGAGACAAGTTGAATGTTTAAACTATCGGCTCAACTGATAGTCGC
ASV29301	605	-0.70949	TRUE	FALSE	Malawi (Rural)	d__Bacteria	Firmicutes	Oscillospirales	Ruminococcaceae	NA	Human (USA/Malawi/Venezuela)	TACGTAGGGAGCAAGCGTTGTCCGGAATTACTGGGTGTAAAGGGTGCGTAGGCGGGCTTGCAAGTCAGCCGTGAAATCCCGGGGCTTAACCCCGTGGACT
ASV29378	586	2.16273	TRUE	FALSE	USA (Urban)	d__Bacteria	Bacteroidota	Bacteroidales	Bacteroidaceae	Bacteroides	Human (USA/Malawi/Venezuela)	TACGGAGGATCCGAGCGTTATCCGGATTTATTGGGTTTAAAGGGAGCGTAGGTGGACTGGTAAGTCAGTTGTGAAAGTTTGCGGCTCAACCGTAAAATTG
ASV29378	516	-0.963759	TRUE	FALSE	USA (Urban)	d__Bacteria	Bacteroidota	Bacteroidales	Bacteroidaceae	Bacteroides	Human (USA/Malawi/Venezuela)	TACGGAGGATCCGAGCGTTATCCGGATTTATTGGGTTTAAAGGGAGCGTAGGTGGACTGGTAAGTCAGTTGTGAAAGTTTGCGGCTCAACCGTAAAATTG
ASV29405	792	0.936631	TRUE	TRUE	USA (Urban)	d__Bacteria	Actinobacteriota	Corynebacteriales	Corynebacteriaceae	Corynebacterium	Human (USA/Malawi/Venezuela)	TACGTAGGGTGCAAGCGTTGTCCGGAATTACTGGGCGTAAAGAGCTCGTAGGTGGTTTGTCACGTCGTCTGTGAAATTCCACAGCTTAACTGTGGGCGTG
ASV29435	791	0.758011	TRUE	TRUE	USA (Urban)	d__Bacteria	Firmicutes	Clostridia_vadinBB60_group	Clostridia_vadinBB60_group	Clostridia_vadinBB60_group	Human (USA/Malawi/Venezuela)	TACGTAGGTAGCAAGCGTTGTCCGGAATGACTGGGCGTAAAGGGTGCGTAGGTGGTTTATCAAGTTGGTGGTGTAATTCCGGGGCTTAACTCCGGAGCTA
ASV29470	543	-0.54363	TRUE	FALSE	Malawi (Rural)	d__Bacteria	Firmicutes	Peptococcales	Peptococcaceae	uncultured	Human (USA/Malawi/Venezuela)	TACGTAGGGAGCGAGCGTTGTCCGGAATTACTGGGCGTAAAGGGCGCGTAGGCGGGGTTTTAAGTAGGGTGTGAAAACTATAGGCTTAACCTGTAGACTG
ASV2948	511	-0.157702	TRUE	FALSE	USA (Urban)	d__Bacteria	Firmicutes	Oscillospirales	[Clostridium]_methylpentosum_group	[Clostridium]_methylpentosum_group	Human (USA/Malawi/Venezuela)	TACGTAGGGAGCGAGCGTTGTCCGGAATTACTGGGTGTAAAGGGAGCGTAGGCGGGACAGCAAGTTGAATGTGAAAGGTAGGGGCTCAACCCCTACACTG
ASV2948	549	-0.266333	TRUE	FALSE	Malawi (Rural)	d__Bacteria	Firmicutes	Oscillospirales	[Clostridium]_methylpentosum_group	[Clostridium]_methylpentosum_group	Human (USA/Malawi/Venezuela)	TACGTAGGGAGCGAGCGTTGTCCGGAATTACTGGGTGTAAAGGGAGCGTAGGCGGGACAGCAAGTTGAATGTGAAAGGTAGGGGCTCAACCCCTACACTG
ASV29583	497	-0.220301	TRUE	FALSE	Malawi (Rural)	d__Bacteria	Firmicutes	Oscillospirales	Butyricicoccaceae	UCG-009	Human (USA/Malawi/Venezuela)	TACGTAGGTGGCAAGCGTTATCCGGATTTACTGGGTGTAAAGGGCGAGTAGGCGGGCATACAAGTCAGATGTGAAATGTGGGGGCTTAACTCCCAAGCTG
ASV29723	724	0.847044	TRUE	TRUE	Venezuela (Rural)	d__Bacteria	Firmicutes	Lachnospirales	Lachnospiraceae	GCA-900066575	Human (USA/Malawi/Venezuela)	TACGTAGGGGGCAAGCGTTATCCGGATTTACTGGGTGTAAAGGGAGCGTAGGTGGCGATGCAAGCCAGAAGTGAAAACCCGGGGCTCAACCCCGAGGACT
ASV29723	784	-0.859505	TRUE	TRUE	Malawi (Rural)	d__Bacteria	Firmicutes	Lachnospirales	Lachnospiraceae	GCA-900066575	Human (USA/Malawi/Venezuela)	TACGTAGGGGGCAAGCGTTATCCGGATTTACTGGGTGTAAAGGGAGCGTAGGTGGCGATGCAAGCCAGAAGTGAAAACCCGGGGCTCAACCCCGAGGACT
ASV29780	791	-1.16788	TRUE	TRUE	USA (Urban)	d__Bacteria	Firmicutes	Erysipelotrichales	Erysipelotrichaceae	Turicibacter	Human (USA/Malawi/Venezuela)	TACGTAGGTGGCGAGCGTTATCCGGAATTATTGGGCGTAAAGAGCGCGCAGGTGGTTGATTAAGTCTGATGTGAAAGCCCACGGCTTAACCGTGGAGGGT
ASV29780	603	1.17887	TRUE	FALSE	USA (Urban)	d__Bacteria	Firmicutes	Erysipelotrichales	Erysipelotrichaceae	Turicibacter	Human (USA/Malawi/Venezuela)	TACGTAGGTGGCGAGCGTTATCCGGAATTATTGGGCGTAAAGAGCGCGCAGGTGGTTGATTAAGTCTGATGTGAAAGCCCACGGCTTAACCGTGGAGGGT
ASV29859	538	-0.0913226	TRUE	FALSE	Malawi (Rural)	d__Bacteria	Firmicutes	Oscillospirales	Oscillospiraceae	NA	Human (USA/Malawi/Venezuela)	TACGTAGGTGGCAAGCGTTATCCGGATTTACTGGGTGTAAAGGGCGTGTAGGCGGGAAAGCAAGTCAGGCGTGAAAACTATGGGCTCAACCCATAGCCTG
ASV29898	624	-0.623998	TRUE	TRUE	USA (Urban)	d__Bacteria	Firmicutes	Lachnospirales	Lachnospiraceae	Lachnospira	Human (USA/Malawi/Venezuela)	TACGTATGGAGCAAGCGTTATCCGGATTTACTGGGTGTAAAGGGAGTGTAGGTGGCATCACAAGTCAGAAGTGAAAGCCCGGGGCTCAACCCCGGGACTG
ASV30041	496	-0.152496	TRUE	FALSE	Malawi (Rural)	d__Bacteria	Firmicutes	Oscillospirales	NA	NA	Human (USA/Malawi/Venezuela)	TACGTAGGTGGCAAGCGTTGTCCGGATTTACTGGGTGTAAAGGGAGCGTAGGCGGGAATGCAAGTCGGATGTGAAACCTATGGGCTTAACCCATAGCCTG
ASV30047	592	0.614974	TRUE	FALSE	USA (Urban)	d__Archaea	Euryarchaeota	Methanobacteriales	Methanobacteriaceae	Methanobrevibacter	Human (USA/Malawi/Venezuela)	CACCGGCAGCTCTAGTGGTAGCAGTTTTTATTGGGCCTAAAGCGTCCGTAGCCGGTTTAATAAGTCTCTGGTGAAATCCTGCAGCTTAACTGTGGGAATT
ASV30047	739	-1.13993	TRUE	TRUE	USA (Urban)	d__Archaea	Euryarchaeota	Methanobacteriales	Methanobacteriaceae	Methanobrevibacter	Human (USA/Malawi/Venezuela)	CACCGGCAGCTCTAGTGGTAGCAGTTTTTATTGGGCCTAAAGCGTCCGTAGCCGGTTTAATAAGTCTCTGGTGAAATCCTGCAGCTTAACTGTGGGAATT
ASV30114	781	0.552874	TRUE	TRUE	USA (Urban)	d__Bacteria	Firmicutes	Izemoplasmatales	Izemoplasmatales	Izemoplasmatales	Human (USA/Malawi/Venezuela)	TACATAGGGGGCGAGCGTTATCCGGAATTATTGGGCGTAAAGCGTGCGTAGGCGGCCGTTTAAGTCTGTCGTGAAAGCCCACAGCTTAACTGTGGAGGGT
ASV30114	768	-0.816574	TRUE	TRUE	USA (Urban)	d__Bacteria	Firmicutes	Izemoplasmatales	Izemoplasmatales	Izemoplasmatales	Human (USA/Malawi/Venezuela)	TACATAGGGGGCGAGCGTTATCCGGAATTATTGGGCGTAAAGCGTGCGTAGGCGGCCGTTTAAGTCTGTCGTGAAAGCCCACAGCTTAACTGTGGAGGGT
ASV30126	662	0.863971	TRUE	TRUE	USA (Urban)	d__Bacteria	Firmicutes	Lachnospirales	Lachnospiraceae	Roseburia	Human (USA/Malawi/Venezuela)	TACGTATGGTGCAAGCGTTATCCGGATTTACTGGGTGTAAAGGGAGCGCAGGCGGTACGGCAAGTCTGATGTGAAATCCCGGGGCTCAACCCCGGTACTG
ASV30126	636	-1.00981	TRUE	TRUE	USA (Urban)	d__Bacteria	Firmicutes	Lachnospirales	Lachnospiraceae	Roseburia	Human (USA/Malawi/Venezuela)	TACGTATGGTGCAAGCGTTATCCGGATTTACTGGGTGTAAAGGGAGCGCAGGCGGTACGGCAAGTCTGATGTGAAATCCCGGGGCTCAACCCCGGTACTG
ASV30210	426	0.186267	TRUE	FALSE	Venezuela (Rural)	d__Bacteria	Firmicutes	Oscillospirales	NA	NA	Human (USA/Malawi/Venezuela)	TACGTAGGTGGCGAGCGTTATCCGGATTTACTGGGTGTAAAGGGCGAGTAGGCGGGCATGCAAGTCAGATGTGAAATTTATGGGCTCAACCCATAACCTG
ASV30365	798	-0.383804	TRUE	TRUE	USA (Urban)	d__Bacteria	Firmicutes	Oscillospirales	Oscillospiraceae	uncultured	Human (USA/Malawi/Venezuela)	TACGTAGGTGGCAAGCGTTATCCGGATTTACTGGGTGTAAAGGGCGTGTAGGCGGGACTGCAAGTCAGGCGTGAAAACCAGAGGCTCAACCTCTGGCCTG
ASV30365	804	0.691417	TRUE	TRUE	USA (Urban)	d__Bacteria	Firmicutes	Oscillospirales	Oscillospiraceae	uncultured	Human (USA/Malawi/Venezuela)	TACGTAGGTGGCAAGCGTTATCCGGATTTACTGGGTGTAAAGGGCGTGTAGGCGGGACTGCAAGTCAGGCGTGAAAACCAGAGGCTCAACCTCTGGCCTG
ASV3040	579	-1.26259	TRUE	FALSE	Malawi (Rural)	d__Bacteria	Firmicutes	Oscillospirales	Ruminococcaceae	Candidatus_Soleaferrea	Human (USA/Malawi/Venezuela)	TACGTAGGTGGCAAGCGTTGTCCGGAATTACTGGGTGTAAAGGGAGCGTAGGCGGGAATGCAAGTCAAGTGTTAAATCTATCGGCTCAACTGATAGCTGC
ASV30422	826	1.40959	TRUE	TRUE	Venezuela (Rural)	d__Bacteria	Bacteroidota	Bacteroidales	Prevotellaceae	uncultured	Human (USA/Malawi/Venezuela)	TACGGAAGGTCCAGGCGTTATCCGGATTTATTGGGTTTAAAGGGAGCGTAGGCCGCCCCTTAAGCGTGTTGTGAAATGCCGCGGCTCAACCGTGGCACTG
ASV30492	676	-0.0868174	TRUE	TRUE	USA (Urban)	d__Bacteria	Firmicutes	Oscillospirales	Butyricicoccaceae	Butyricicoccus	Human (USA/Malawi/Venezuela)	TACGTAGGGAGCAAGCGTTATCCGGATTTACTGGGTGTAAAGGGCGCGCAGGCGGGCCGGCAAGTTGGAAGTGAAATCTATGGGCTTAACCCATAAACTG
ASV30492	752	-1.69756	TRUE	TRUE	Malawi (Rural)	d__Bacteria	Firmicutes	Oscillospirales	Butyricicoccaceae	Butyricicoccus	Human (USA/Malawi/Venezuela)	TACGTAGGGAGCAAGCGTTATCCGGATTTACTGGGTGTAAAGGGCGCGCAGGCGGGCCGGCAAGTTGGAAGTGAAATCTATGGGCTTAACCCATAAACTG
ASV3060	604	-0.663253	TRUE	FALSE	Malawi (Rural)	d__Bacteria	Firmicutes	Erysipelotrichales	Erysipelotrichaceae	Erysipelotrichaceae	Human (USA/Malawi/Venezuela)	TACGTAGGTGGCGAGCGTTATCCGGAATCATTGGGCGTAAAGGGTGCGTAGGCGGCGAGTTAAGTCTGAGGTAAAAGGTTGCAGCTCAACTGTAACAAGC
ASV3060	524	0.65529	TRUE	FALSE	Venezuela (Rural)	d__Bacteria	Firmicutes	Erysipelotrichales	Erysipelotrichaceae	Erysipelotrichaceae	Human (USA/Malawi/Venezuela)	TACGTAGGTGGCGAGCGTTATCCGGAATCATTGGGCGTAAAGGGTGCGTAGGCGGCGAGTTAAGTCTGAGGTAAAAGGTTGCAGCTCAACTGTAACAAGC
ASV30600	442	0.265594	TRUE	FALSE	Venezuela (Rural)	d__Bacteria	Actinobacteriota	Bifidobacteriales	Bifidobacteriaceae	Bifidobacterium	Human (USA/Malawi/Venezuela)	TACGTAGGGCGCAAGCGTTATCCGGATTTATTGGGCGTAAAGGGCTCGTAGGCGGCTCGTCGCGTCCGGTGTGAAAGTCCATCGCTTAACGGTGGGTCTG
ASV30622	472	-0.203168	TRUE	FALSE	Malawi (Rural)	d__Bacteria	Firmicutes	Peptostreptococcales-Tissierellales	Peptostreptococcales-Tissierellales	Finegoldia	Human (USA/Malawi/Venezuela)	TACGTATGGAGCGAGCGTTGTCCGGAATTATTGGGCGTAAAGGGTACGCAGGCGGTTTAATAAGTCGAATGTTAAAGATCGGGGCTCAACCCCGTAAAGC
ASV30622	426	0.0752316	TRUE	FALSE	Venezuela (Rural)	d__Bacteria	Firmicutes	Peptostreptococcales-Tissierellales	Peptostreptococcales-Tissierellales	Finegoldia	Human (USA/Malawi/Venezuela)	TACGTATGGAGCGAGCGTTGTCCGGAATTATTGGGCGTAAAGGGTACGCAGGCGGTTTAATAAGTCGAATGTTAAAGATCGGGGCTCAACCCCGTAAAGC
ASV30712	538	-0.388672	TRUE	FALSE	Malawi (Rural)	d__Bacteria	Firmicutes	Peptostreptococcales-Tissierellales	Peptostreptococcales-Tissierellales	Parvimonas	Human (USA/Malawi/Venezuela)	TACGTATGGGGCGAGCGTTGTCCGGAATTATTGGGCGTAAAGGGTACGTAGGCGGCCTTTTAAGTCAGGTGTGAAAGCGTGAGGCTTAACCTCATTAAGC
ASV30712	508	-0.0285885	TRUE	FALSE	USA (Urban)	d__Bacteria	Firmicutes	Peptostreptococcales-Tissierellales	Peptostreptococcales-Tissierellales	Parvimonas	Human (USA/Malawi/Venezuela)	TACGTATGGGGCGAGCGTTGTCCGGAATTATTGGGCGTAAAGGGTACGTAGGCGGCCTTTTAAGTCAGGTGTGAAAGCGTGAGGCTTAACCTCATTAAGC
ASV30750	604	0.0302684	TRUE	TRUE	Venezuela (Rural)	d__Bacteria	Firmicutes	Oscillospirales	Oscillospiraceae	Intestinimonas	Human (USA/Malawi/Venezuela)	TACGTAGGTGGCAAGCGTTATCCGGATTTACTGGGTGTAAAGGGCGTGTAGGCGGGACTGCAAGTCAGATGTGAAAACTATGAGCTCAACTCATAGCCTG
ASV30750	665	-0.0398734	TRUE	TRUE	Malawi (Rural)	d__Bacteria	Firmicutes	Oscillospirales	Oscillospiraceae	Intestinimonas	Human (USA/Malawi/Venezuela)	TACGTAGGTGGCAAGCGTTATCCGGATTTACTGGGTGTAAAGGGCGTGTAGGCGGGACTGCAAGTCAGATGTGAAAACTATGAGCTCAACTCATAGCCTG
ASV30762	682	0.795539	TRUE	TRUE	Venezuela (Rural)	d__Bacteria	Firmicutes	Oscillospirales	Oscillospirales	Hydrogenoanaerobacterium	Human (USA/Malawi/Venezuela)	TACGTAGGGTGCAAGCGTTGTCCGGAATTACTGGGTGTAAAGGGAGCGTAGGCGGGTCAGCAAGTTGGATGTGAAATGTACCGGCTCAACTGGTAAACTG
ASV30762	744	-0.903115	TRUE	TRUE	Malawi (Rural)	d__Bacteria	Firmicutes	Oscillospirales	Oscillospirales	Hydrogenoanaerobacterium	Human (USA/Malawi/Venezuela)	TACGTAGGGTGCAAGCGTTGTCCGGAATTACTGGGTGTAAAGGGAGCGTAGGCGGGTCAGCAAGTTGGATGTGAAATGTACCGGCTCAACTGGTAAACTG
ASV30777	765	0.773747	TRUE	TRUE	USA (Urban)	d__Bacteria	Firmicutes	Oscillospirales	UCG-010	UCG-010	Human (USA/Malawi/Venezuela)	TACGTAGGTGGCGAGCGTTATCCGGAATTACTGGGTGTAAAGGGTGTGTAGGCGGGACTTCAAGTCAGATGTGAAAATTGCGGGCTCAACCCGCAACCTG
ASV30777	747	-0.207132	TRUE	TRUE	USA (Urban)	d__Bacteria	Firmicutes	Oscillospirales	UCG-010	UCG-010	Human (USA/Malawi/Venezuela)	TACGTAGGTGGCGAGCGTTATCCGGAATTACTGGGTGTAAAGGGTGTGTAGGCGGGACTTCAAGTCAGATGTGAAAATTGCGGGCTCAACCCGCAACCTG
ASV30798	775	-1.42152	TRUE	TRUE	USA (Urban)	d__Bacteria	Firmicutes	Christensenellales	Christensenellaceae	Christensenellaceae_R-7_group	Human (USA/Malawi/Venezuela)	TACGTAGGGGGCAAGCGTTGTCCGGAATGATTGGGCGTAAAGGGCGCGTAGGCGGCCAACTAAGTCTGAAGTGAAACTCCTGCTTTTAAGGCAGGAACTG
ASV30856	635	1.22961	TRUE	TRUE	USA (Urban)	d__Bacteria	Firmicutes	Lachnospirales	Lachnospiraceae	NA	Human (USA/Malawi/Venezuela)	TACGTAGGGGGCAAGCGTTATCCGGATTTACTGGGTGTAAAGGGAGCGCAGGTGGCAAGGCAAGCCAGAAGTGAAAACCCGGGGCTTAACCCCGTGGATT
ASV30856	735	-0.900491	TRUE	TRUE	USA (Urban)	d__Bacteria	Firmicutes	Lachnospirales	Lachnospiraceae	NA	Human (USA/Malawi/Venezuela)	TACGTAGGGGGCAAGCGTTATCCGGATTTACTGGGTGTAAAGGGAGCGCAGGTGGCAAGGCAAGCCAGAAGTGAAAACCCGGGGCTTAACCCCGTGGATT
ASV30886	818	0.777022	TRUE	TRUE	USA (Urban)	d__Bacteria	Firmicutes	Oscillospirales	UCG-010	UCG-010	Human (USA/Malawi/Venezuela)	TACGTAGGTGGCAAGCGTTATCCGGATTTACTGGGTGTAAAGGGTGTGTAGGCGGGGAATCAAGTCAGATGTGAAAATCATGGGCTCAACTCATGACTTG
ASV30893	501	1.00069	TRUE	FALSE	Venezuela (Rural)	d__Bacteria	Firmicutes	Oscillospirales	Ruminococcaceae	NA	Human (USA/Malawi/Venezuela)	TACGTAGGGAGCGAGCGTTGTCCGGAATTACTGGGTGTAAAGGGAGCGTAGGCGGGATTGCAAGTCAAGTGTTAAATCTATCGGCTCAACTGATAGTCGC
ASV30893	601	-1.11947	TRUE	FALSE	Malawi (Rural)	d__Bacteria	Firmicutes	Oscillospirales	Ruminococcaceae	NA	Human (USA/Malawi/Venezuela)	TACGTAGGGAGCGAGCGTTGTCCGGAATTACTGGGTGTAAAGGGAGCGTAGGCGGGATTGCAAGTCAAGTGTTAAATCTATCGGCTCAACTGATAGTCGC
ASV30979	476	-0.131046	TRUE	FALSE	Malawi (Rural)	d__Bacteria	Firmicutes	Oscillospirales	Oscillospiraceae	Flavonifractor	Human (USA/Malawi/Venezuela)	TACGTAGGTGGCAAGCGTTATCCGGATTTACTGGGTGTAAAGGGCGTGTAGGCGGGACTGCAAGTCAGGTGTGAAAACCAGGGGCTCAACCTCTGGCCTG
ASV31235	495	-0.0899993	TRUE	FALSE	Malawi (Rural)	d__Bacteria	Verrucomicrobiota	Verrucomicrobiales	Akkermansiaceae	Akkermansia	Human (USA/Malawi/Venezuela)	TACAGAGGTCTCAAGCGTTGTTCGGAATCACTGGGCGTAAAGCGTGCGTAGGCGGTTTCGTAAGTCGTGTGTGAAAGGCGGGGGGTCAACCCCCGGACTG
ASV31283	535	-0.798986	TRUE	FALSE	Malawi (Rural)	d__Bacteria	Firmicutes	Oscillospirales	Ruminococcaceae	NA	Human (USA/Malawi/Venezuela)	TACGTAGGGAGCGAGCGTTGTCCGGAATTACTGGGTGTAAAGGGTGCGTAGGCGGGCCTGCAAGTCAGCCGTGAAATCCCGGGGCTTAACCCCGAGGACT
ASV31283	437	0.789759	TRUE	FALSE	Venezuela (Rural)	d__Bacteria	Firmicutes	Oscillospirales	Ruminococcaceae	NA	Human (USA/Malawi/Venezuela)	TACGTAGGGAGCGAGCGTTGTCCGGAATTACTGGGTGTAAAGGGTGCGTAGGCGGGCCTGCAAGTCAGCCGTGAAATCCCGGGGCTTAACCCCGAGGACT
ASV31315	799	1.07072	TRUE	TRUE	USA (Urban)	d__Bacteria	Firmicutes	Lachnospirales	Lachnospiraceae	NA	Human (USA/Malawi/Venezuela)	TACGTAGGGGGCAAGCGTTATCCGGAATTACTGGGTGTAAAGGGTGCGTAGGCGGCAATGCAAGTCAGTCGTGAAAGGTATGGGCTTAACCCGTAAACTG
ASV31414	444	0.736002	TRUE	FALSE	USA (Urban)	d__Bacteria	Firmicutes	Lachnospirales	Lachnospiraceae	[Eubacterium]_ventriosum_group	Human (USA/Malawi/Venezuela)	TACGTATGGGGCAAGCGTTATCCGGATTTACTGGGTGTAAAGGGAGCGTAGGCGGTATGGCAAGTCAGAAGTGAAAGCCTGGGGCTCAACCCCGGAATTG
ASV31505	456	0.77607	TRUE	FALSE	Venezuela (Rural)	d__Bacteria	Firmicutes	Christensenellales	Christensenellaceae	NA	Human (USA/Malawi/Venezuela)	TACGTAGGGAGCAAGCGTTGTCCGGAATTACTGGGCGTAAAGGGTGCGTAGGTGGCCATGTAAGTCAGGTGTGAAAGACCGGGGCTCAACCCCGGGGTTG
ASV31505	602	-0.969286	TRUE	FALSE	Malawi (Rural)	d__Bacteria	Firmicutes	Christensenellales	Christensenellaceae	NA	Human (USA/Malawi/Venezuela)	TACGTAGGGAGCAAGCGTTGTCCGGAATTACTGGGCGTAAAGGGTGCGTAGGTGGCCATGTAAGTCAGGTGTGAAAGACCGGGGCTCAACCCCGGGGTTG
ASV31517	560	-0.579796	TRUE	FALSE	Malawi (Rural)	d__Bacteria	Verrucomicrobiota	Verrucomicrobiales	Akkermansiaceae	Akkermansia	Human (USA/Malawi/Venezuela)	TACAGAGGTCTCAAGCGTTGTTCGGAATCACTGGGCGTAAAGCGTGCGTAGGCTGTTTCGTAAGTCGTGTGTGAAAAGCGCGGGCTCAACCCGCGGACGG
ASV31517	452	0.511049	TRUE	FALSE	Venezuela (Rural)	d__Bacteria	Verrucomicrobiota	Verrucomicrobiales	Akkermansiaceae	Akkermansia	Human (USA/Malawi/Venezuela)	TACAGAGGTCTCAAGCGTTGTTCGGAATCACTGGGCGTAAAGCGTGCGTAGGCTGTTTCGTAAGTCGTGTGTGAAAAGCGCGGGCTCAACCCGCGGACGG
ASV31594	809	-0.516489	TRUE	TRUE	Malawi (Rural)	d__Bacteria	Firmicutes	Lachnospirales	Lachnospiraceae	Lachnospiraceae_UCG-001	Human (USA/Malawi/Venezuela)	TACGTATGGTGCAAGCGTTATCCGGATTTACTGGGTGTAAAGGGAGCGCAGGCGGTTTGGCAAGTCTGATGTGAAAATCCGGGGCTCAACTCCGGAACTG
ASV31601	629	-1.0099	TRUE	TRUE	USA (Urban)	d__Bacteria	Firmicutes	Lachnospirales	Lachnospiraceae	Lachnospira	Human (USA/Malawi/Venezuela)	TACGTATGGAGCAAGCGTTATCCGGATTTACTGGGTGTAAAGGGAGTGTAGGTGGCCAGGCAAGTCAGAAGTGAAAGCCCGGGGCTCAACCCCGGGACTG
ASV31629	508	0.0988556	TRUE	FALSE	USA (Urban)	d__Bacteria	Firmicutes	Lachnospirales	Lachnospiraceae	NA	Human (USA/Malawi/Venezuela)	TACGTAGGGGGCAAGCGTTATCCGGAATTACTGGGTGTAAAGGGTGAGTAGGCGGCACGGCAAGTAAGATGTGAAAGCCCGAGGCTTAACCTCGGGATTG
ASV31701	497	-0.413253	TRUE	FALSE	Malawi (Rural)	d__Bacteria	Firmicutes	Oscillospirales	Ruminococcaceae	NA	Human (USA/Malawi/Venezuela)	TACGTAGGGAGCGAGCGTTGTCCGGATTTACTGGGTGTAAAGGGTGCGTAGGCGGATTTTCAAGTCAGTAGTGAAATGCAGGGGCTTAACCCCTGAGCTG
ASV31701	762	-1.35558	TRUE	TRUE	USA (Urban)	d__Bacteria	Firmicutes	Oscillospirales	Ruminococcaceae	NA	Human (USA/Malawi/Venezuela)	TACGTAGGGAGCGAGCGTTGTCCGGATTTACTGGGTGTAAAGGGTGCGTAGGCGGATTTTCAAGTCAGTAGTGAAATGCAGGGGCTTAACCCCTGAGCTG
ASV31719	709	0.436856	TRUE	TRUE	Venezuela (Rural)	d__Bacteria	Firmicutes	Lachnospirales	Lachnospiraceae	NA	Human (USA/Malawi/Venezuela)	TACGTAGGGGGCAAGCGTTATCCGGATTTACTGGGTGTAAAGGGAGCGTAGACGGCGATGCAAGTCTGAAGTGAAATACCCGGGCTCAACCTGGGAACTG
ASV31719	779	-0.880277	TRUE	TRUE	Malawi (Rural)	d__Bacteria	Firmicutes	Lachnospirales	Lachnospiraceae	NA	Human (USA/Malawi/Venezuela)	TACGTAGGGGGCAAGCGTTATCCGGATTTACTGGGTGTAAAGGGAGCGTAGACGGCGATGCAAGTCTGAAGTGAAATACCCGGGCTCAACCTGGGAACTG
ASV31787	477	0.770273	TRUE	FALSE	USA (Urban)	d__Bacteria	Firmicutes	Lachnospirales	Lachnospiraceae	Coprococcus	Human (USA/Malawi/Venezuela)	TACGTAGGGGGCAAGCGTTATCCGGATTTACTGGGTGTAAAGGGAGCGTAGGCGGCGGAGCAAGTCAGAAGTGAAAGCCCGGGGCTCAACCCCGGGACGG
ASV31891	720	-0.489155	TRUE	TRUE	USA (Urban)	d__Bacteria	Firmicutes	Oscillospirales	UCG-010	UCG-010	Human (USA/Malawi/Venezuela)	TACGTAGGTGGCAAGCGTTATCCGGATTTACTGGGTGTAAAGGGTGTGTAGGCGGGGAAACAAGTCAGATGTGAAATGCCAAGGCTAAACCATGGAGCTG
ASV31891	734	0.25192	TRUE	TRUE	USA (Urban)	d__Bacteria	Firmicutes	Oscillospirales	UCG-010	UCG-010	Human (USA/Malawi/Venezuela)	TACGTAGGTGGCAAGCGTTATCCGGATTTACTGGGTGTAAAGGGTGTGTAGGCGGGGAAACAAGTCAGATGTGAAATGCCAAGGCTAAACCATGGAGCTG
ASV31905	508	-0.733851	TRUE	FALSE	Malawi (Rural)	d__Bacteria	Firmicutes	Clostridiales	Clostridiaceae	Clostridium_sensu_stricto_18	Human (USA/Malawi/Venezuela)	TACGTAGGTGGCGAGCGTTGTCCGGATTTACTGGGCGTAAAGGGTGCGTAGGCGGATGTTTAAGTGGGATGTGAAATCCCCGGGCTTAACCTGGGGGCTG
ASV31937	508	-0.0194265	TRUE	FALSE	USA (Urban)	d__Bacteria	Firmicutes	Christensenellales	Christensenellaceae	Christensenellaceae	Human (USA/Malawi/Venezuela)	TACGTAGGGAGCAAGCGTTGTCCGGAATTACTGGGCGTAAAGGGTGCGTAGGTGGCCATGTAAGTTAGGTGTGAAAGACCGGGGCTTAACTCCGGGGCGG
ASV31980	763	-0.219366	TRUE	TRUE	USA (Urban)	d__Bacteria	Firmicutes	Lactobacillales	Leuconostocaceae	Weissella	Human (USA/Malawi/Venezuela)	TACGTATGTTCCAAGCGTTATCCGGATTTATTGGGCGTAAAGCGAGCGCAGACGGTTATTTAAGTCTGAAGTGAAAGCCCTCAGCTCAACTGAGGAATTG
ASV31980	778	0.869964	TRUE	TRUE	USA (Urban)	d__Bacteria	Firmicutes	Lactobacillales	Leuconostocaceae	Weissella	Human (USA/Malawi/Venezuela)	TACGTATGTTCCAAGCGTTATCCGGATTTATTGGGCGTAAAGCGAGCGCAGACGGTTATTTAAGTCTGAAGTGAAAGCCCTCAGCTCAACTGAGGAATTG
ASV32022	510	-0.608446	TRUE	FALSE	Malawi (Rural)	d__Bacteria	Firmicutes	Clostridia_vadinBB60_group	Clostridia_vadinBB60_group	Clostridia_vadinBB60_group	Human (USA/Malawi/Venezuela)	TACGTAGGATGCAAGCGTTATCCGGAATGACTGGGCGTAAAGGGTGCGTAGGTGGTTTGCCAAGTTGGCAGCGTAATTCCGGGGCTTAACCCCGGAACTA
ASV32068	863	-2.20615	TRUE	TRUE	Malawi (Rural)	d__Bacteria	Firmicutes	Oscillospirales	Ruminococcaceae	Faecalibacterium	Human (USA/Malawi/Venezuela)	AACGTAGGTCACAAGCGTTGTCCGGAATTACTGGGTGTAAAGGGAGCGCAGGCGGGAAAGCAAGTTGGAAGTGAAATCCATGGGCTCAACCCATGAACTG
ASV32078	773	-0.354717	TRUE	TRUE	Malawi (Rural)	d__Bacteria	Firmicutes	Lachnospirales	Lachnospiraceae	Lachnospiraceae_UCG-010	Human (USA/Malawi/Venezuela)	TACGTAGGGGGCAAGCGTTATCCGGAATTACTGGGTGTAAAGGGAGCGTAGGCGGCATGGTAAGTAAGATGTGAAAGCCCGAGGCTTAACCTCGAGGATT
ASV32109	734	-1.53132	TRUE	TRUE	Malawi (Rural)	d__Bacteria	Firmicutes	Oscillospirales	Ruminococcaceae	Faecalibacterium	Human (USA/Malawi/Venezuela)	AACGTAGGTCACAAGCGTTGTCCGGAATTACTGGGTGTAAAGGGAGCGCAGGCGGGAAGGCAAGTTGGAAGTGAAATCCATGGGCTCAACCCATGAACTG
ASV32149	648	-0.982975	TRUE	TRUE	USA (Urban)	d__Bacteria	Firmicutes	Lachnospirales	Lachnospiraceae	Blautia	Human (USA/Malawi/Venezuela)	TACGTAGGGGGCAAGCGTTATCCGGATTTACTGGGTGTAAAGGGAGCGTAGACGGTGTGGCAAGTCTGATGTGAAAGGCATGGGCTCAACCTGTGGACTG
ASV32149	640	0.813844	TRUE	TRUE	USA (Urban)	d__Bacteria	Firmicutes	Lachnospirales	Lachnospiraceae	Blautia	Human (USA/Malawi/Venezuela)	TACGTAGGGGGCAAGCGTTATCCGGATTTACTGGGTGTAAAGGGAGCGTAGACGGTGTGGCAAGTCTGATGTGAAAGGCATGGGCTCAACCTGTGGACTG
ASV32186	833	-4.70453	TRUE	TRUE	USA (Urban)	d__Bacteria	Bacteroidota	Bacteroidales	Bacteroidaceae	Bacteroides	Human (USA/Malawi/Venezuela)	TACGGAGGATCCGAGCGTTATCCGGATTTATTGGGTTTAAAGGGAGCGTAGATGGATGTTTAAGTCAGTTGTGAAAGTTTGCGGCTCAACCGTAAAATTG
ASV32186	871	6.47539	TRUE	TRUE	USA (Urban)	d__Bacteria	Bacteroidota	Bacteroidales	Bacteroidaceae	Bacteroides	Human (USA/Malawi/Venezuela)	TACGGAGGATCCGAGCGTTATCCGGATTTATTGGGTTTAAAGGGAGCGTAGATGGATGTTTAAGTCAGTTGTGAAAGTTTGCGGCTCAACCGTAAAATTG
ASV32192	786	-0.679576	TRUE	TRUE	USA (Urban)	d__Bacteria	Firmicutes	Acidaminococcales	Acidaminococcaceae	Phascolarctobacterium	Human (USA/Malawi/Venezuela)	TACGTAGGTGGCGAGCGTTGTCCGGAATTATTGGGCGTAAAGAGCATGTAGGCGGCTTAATAAGTCGAGCGTGAAAATGCGGGGCTCAACCCCGTATGGC
ASV32192	824	0.537286	TRUE	TRUE	USA (Urban)	d__Bacteria	Firmicutes	Acidaminococcales	Acidaminococcaceae	Phascolarctobacterium	Human (USA/Malawi/Venezuela)	TACGTAGGTGGCGAGCGTTGTCCGGAATTATTGGGCGTAAAGAGCATGTAGGCGGCTTAATAAGTCGAGCGTGAAAATGCGGGGCTCAACCCCGTATGGC
ASV3225	448	0.287984	TRUE	FALSE	Venezuela (Rural)	d__Bacteria	Firmicutes	Lachnospirales	Lachnospiraceae	NA	Human (USA/Malawi/Venezuela)	TACGTAGGGGGCAAGCGTTATCCGGAATTACTGGGTGTAAAGGGTGCGTAGGTGGCATGGCAAGTCTGATGTGAAACCCCCGGGCTCAACCTGGGGCATG
ASV32348	546	0.644495	TRUE	FALSE	Venezuela (Rural)	d__Bacteria	Verrucomicrobiota	Verrucomicrobiales	Akkermansiaceae	Akkermansia	Human (USA/Malawi/Venezuela)	TACAGAGGTCTCAAGCGTTGTTCGGAATCACTGGGCGTAAAGCGTGCGTAGGCTGTTTCGTAAGTCGTGTGTGAAAGGCAGGGGCTCAACCCCTGGATTG
ASV32348	631	-0.653307	TRUE	TRUE	Malawi (Rural)	d__Bacteria	Verrucomicrobiota	Verrucomicrobiales	Akkermansiaceae	Akkermansia	Human (USA/Malawi/Venezuela)	TACAGAGGTCTCAAGCGTTGTTCGGAATCACTGGGCGTAAAGCGTGCGTAGGCTGTTTCGTAAGTCGTGTGTGAAAGGCAGGGGCTCAACCCCTGGATTG
ASV32439	691	0.636189	TRUE	TRUE	Venezuela (Rural)	d__Bacteria	Firmicutes	Clostridia_UCG-014	Clostridia_UCG-014	Clostridia_UCG-014	Human (USA/Malawi/Venezuela)	TACGTAGGGAGCGAGCGTTATCCGGATTTATTGGGTGTAAAGGGTGCGTAGACGGGAAGTCAAGTTAGTTGTGAAATCCCTCGGCTTAACTGAGGAACTG
ASV32439	768	-0.694747	TRUE	TRUE	Malawi (Rural)	d__Bacteria	Firmicutes	Clostridia_UCG-014	Clostridia_UCG-014	Clostridia_UCG-014	Human (USA/Malawi/Venezuela)	TACGTAGGGAGCGAGCGTTATCCGGATTTATTGGGTGTAAAGGGTGCGTAGACGGGAAGTCAAGTTAGTTGTGAAATCCCTCGGCTTAACTGAGGAACTG
ASV3254	549	-0.305979	TRUE	FALSE	Malawi (Rural)	d__Bacteria	Firmicutes	Oscillospirales	Ruminococcaceae	Faecalibacterium	Human (USA/Malawi/Venezuela)	AACGTAGGTCACAAGCGTTGTCCGGAATTACTGGGTGTAAAGGGAGCGCAGGCGGGCGATCAAGTTGGAAGTGAAATCCATGGGCTCAACCCATGAACTG
ASV3254	662	0.715524	TRUE	TRUE	Venezuela (Rural)	d__Bacteria	Firmicutes	Oscillospirales	Ruminococcaceae	Faecalibacterium	Human (USA/Malawi/Venezuela)	AACGTAGGTCACAAGCGTTGTCCGGAATTACTGGGTGTAAAGGGAGCGCAGGCGGGCGATCAAGTTGGAAGTGAAATCCATGGGCTCAACCCATGAACTG
ASV32643	753	0.0693467	TRUE	TRUE	USA (Urban)	d__Bacteria	Firmicutes	Lactobacillales	Lactobacillaceae	Pediococcus	Human (USA/Malawi/Venezuela)	TACGTAGGTGGCAAGCGTTATCCGGATTTATTGGGCGTAAAGCGAGCGCAGGCGGTCTTTTAAGTCTAATGTGAAAGCCTTCGGCTCAACCGAAGAAGTG
ASV32709	549	0.0653047	TRUE	FALSE	Venezuela (Rural)	d__Bacteria	Firmicutes	Oscillospirales	Ruminococcaceae	Ruminococcus	Human (USA/Malawi/Venezuela)	TACGTAGGGAGCGAGCGTTGTCCGGAATTACTGGGTGTAAAGGGAGCGTAGGCGGGATGGCAAGTCAGATGTGAAAACTATGGGCTCAACCCATAGACTG
ASV32709	709	-0.392019	TRUE	TRUE	Malawi (Rural)	d__Bacteria	Firmicutes	Oscillospirales	Ruminococcaceae	Ruminococcus	Human (USA/Malawi/Venezuela)	TACGTAGGGAGCGAGCGTTGTCCGGAATTACTGGGTGTAAAGGGAGCGTAGGCGGGATGGCAAGTCAGATGTGAAAACTATGGGCTCAACCCATAGACTG
ASV32876	601	1.24198	TRUE	FALSE	USA (Urban)	d__Bacteria	Firmicutes	Oscillospirales	Oscillospiraceae	UCG-002	Human (USA/Malawi/Venezuela)	TACGTAGGTGGCAAGCGTTGTCCGGATTTACTGGGTGTAAAGGGCGTGTAGCCGGGAAGGCAAGTCAGATGTGAAATCCACGGGCTCAACTCGTGAACTG
ASV32876	564	-1.10567	TRUE	FALSE	USA (Urban)	d__Bacteria	Firmicutes	Oscillospirales	Oscillospiraceae	UCG-002	Human (USA/Malawi/Venezuela)	TACGTAGGTGGCAAGCGTTGTCCGGATTTACTGGGTGTAAAGGGCGTGTAGCCGGGAAGGCAAGTCAGATGTGAAATCCACGGGCTCAACTCGTGAACTG
ASV32919	724	0.35491	TRUE	TRUE	Venezuela (Rural)	d__Bacteria	Firmicutes	Christensenellales	Christensenellaceae	Christensenellaceae_R-7_group	Human (USA/Malawi/Venezuela)	TACGTAGGGGGCGAGCGTTGTCCGGAATTACTGGGCGTAAAGGGAGCGTAGGCGGTCTGATAAGTTGGATGTGAAATACCCGGGCTTAACTTGGGGGGTG
ASV32919	734	0.277739	TRUE	TRUE	USA (Urban)	d__Bacteria	Firmicutes	Christensenellales	Christensenellaceae	Christensenellaceae_R-7_group	Human (USA/Malawi/Venezuela)	TACGTAGGGGGCGAGCGTTGTCCGGAATTACTGGGCGTAAAGGGAGCGTAGGCGGTCTGATAAGTTGGATGTGAAATACCCGGGCTTAACTTGGGGGGTG
ASV32931	740	-0.455811	TRUE	TRUE	USA (Urban)	d__Bacteria	Firmicutes	Lachnospirales	Lachnospiraceae	NA	Human (USA/Malawi/Venezuela)	TACGTAGGGGGCAAGCGTTATCCGGAATTACTGGGTGTAAAGGGTGAGTAGGCGGCATGGCAAGTAAGATGTGAAAGCCCGAGGCTTAACCTCGGGATTG
ASV32931	788	0.450781	TRUE	TRUE	USA (Urban)	d__Bacteria	Firmicutes	Lachnospirales	Lachnospiraceae	NA	Human (USA/Malawi/Venezuela)	TACGTAGGGGGCAAGCGTTATCCGGAATTACTGGGTGTAAAGGGTGAGTAGGCGGCATGGCAAGTAAGATGTGAAAGCCCGAGGCTTAACCTCGGGATTG
ASV32937	844	2.56144	TRUE	TRUE	Venezuela (Rural)	d__Bacteria	Firmicutes	Erysipelotrichales	Erysipelatoclostridiaceae	Catenibacterium	Human (USA/Malawi/Venezuela)	TACGTAGGTGGCGAGCGTTATCCGGAATCATTGGGCGTAAAGAGGGAGCAGGCGGCCGCAAGGGTCTGTGGTGAAAGACCGAAGCTAAACTTCGGTAAGC
ASV32937	859	-1.92163	TRUE	TRUE	Malawi (Rural)	d__Bacteria	Firmicutes	Erysipelotrichales	Erysipelatoclostridiaceae	Catenibacterium	Human (USA/Malawi/Venezuela)	TACGTAGGTGGCGAGCGTTATCCGGAATCATTGGGCGTAAAGAGGGAGCAGGCGGCCGCAAGGGTCTGTGGTGAAAGACCGAAGCTAAACTTCGGTAAGC
ASV32938	761	-2.28119	TRUE	TRUE	USA (Urban)	d__Bacteria	Firmicutes	Lachnospirales	Lachnospiraceae	NA	Human (USA/Malawi/Venezuela)	TACGTATGGTGCAAGCGTTATCCGGATTTACTGGGTGTAAAGGGAGCGCAGGCGGTGCGGCAAGTCTGATGTGAAAGCCCGGGGCTCAACCCCGGTACTG
ASV32938	638	0.884462	TRUE	TRUE	USA (Urban)	d__Bacteria	Firmicutes	Lachnospirales	Lachnospiraceae	NA	Human (USA/Malawi/Venezuela)	TACGTATGGTGCAAGCGTTATCCGGATTTACTGGGTGTAAAGGGAGCGCAGGCGGTGCGGCAAGTCTGATGTGAAAGCCCGGGGCTCAACCCCGGTACTG
ASV32953	556	-0.36649	TRUE	FALSE	USA (Urban)	d__Bacteria	Firmicutes	Lachnospirales	Lachnospiraceae	NA	Human (USA/Malawi/Venezuela)	TACGTAGGGGGCAAGCGTTATCCGGATTTACTGGGTGTAAAGGGAGCGTAGACGGCAGCGCAAGTCTGAAGTGAAAGCCCGGGGCTCAACCCCGGAATGG
ASV32953	462	-0.0224377	TRUE	FALSE	Malawi (Rural)	d__Bacteria	Firmicutes	Lachnospirales	Lachnospiraceae	NA	Human (USA/Malawi/Venezuela)	TACGTAGGGGGCAAGCGTTATCCGGATTTACTGGGTGTAAAGGGAGCGTAGACGGCAGCGCAAGTCTGAAGTGAAAGCCCGGGGCTCAACCCCGGAATGG
ASV32968	788	0.220084	TRUE	TRUE	USA (Urban)	d__Bacteria	Firmicutes	Lactobacillales	Lactobacillaceae	Lactobacillus	Human (USA/Malawi/Venezuela)	TACGTAGGTGGCAAGCGTTGTCCGGATTTATTGGGCGTAAAGGGAACGCAGGCGGTCTTTTAAGTCTGATGTGAAAGCCTTCGGCTTAACCGGAGTAGTG
ASV32973	570	-1.83047	TRUE	FALSE	USA (Urban)	d__Bacteria	Firmicutes	Oscillospirales	Ruminococcaceae	Ruminococcus	Human (USA/Malawi/Venezuela)	TACGTAGGGAGCGAGCGTTGTCCGGAATTACTGGGTGTAAAGGGAGCGTAGGCGGGATCGCAAGTCAGATGTGAAAACTATGGGCTTAACCCATAAACTG
ASV32973	693	1.91385	TRUE	TRUE	USA (Urban)	d__Bacteria	Firmicutes	Oscillospirales	Ruminococcaceae	Ruminococcus	Human (USA/Malawi/Venezuela)	TACGTAGGGAGCGAGCGTTGTCCGGAATTACTGGGTGTAAAGGGAGCGTAGGCGGGATCGCAAGTCAGATGTGAAAACTATGGGCTTAACCCATAAACTG
ASV33007	796	-0.27435	TRUE	TRUE	USA (Urban)	d__Bacteria	Firmicutes	Peptostreptococcales-Tissierellales	Anaerovoracaceae	Family_XIII_AD3011_group	Human (USA/Malawi/Venezuela)	TACGTAGGGGGCAAGCGTTATCCGGAATTATTGGGCGTAAAGAGTGCGTAGGTGGTTACCTAAGCAGAGGGTGAAAGGCACTGGCTTAACCAATGTCAGC
ASV33007	814	0.553064	TRUE	TRUE	USA (Urban)	d__Bacteria	Firmicutes	Peptostreptococcales-Tissierellales	Anaerovoracaceae	Family_XIII_AD3011_group	Human (USA/Malawi/Venezuela)	TACGTAGGGGGCAAGCGTTATCCGGAATTATTGGGCGTAAAGAGTGCGTAGGTGGTTACCTAAGCAGAGGGTGAAAGGCACTGGCTTAACCAATGTCAGC
ASV3301	774	0.335981	TRUE	TRUE	Venezuela (Rural)	d__Bacteria	Firmicutes	Oscillospirales	Butyricicoccaceae	UCG-008	Human (USA/Malawi/Venezuela)	TACGTAGGGAGCAAGCGTTATCCGGATTTACTGGGTGTAAAGGGCGAGTAGGCGGATTGGCAAGTTGGGAGTGAAATGTCGGGGCTTAACCCCGGAACTG
ASV3301	871	-2.28128	TRUE	TRUE	Malawi (Rural)	d__Bacteria	Firmicutes	Oscillospirales	Butyricicoccaceae	UCG-008	Human (USA/Malawi/Venezuela)	TACGTAGGGAGCAAGCGTTATCCGGATTTACTGGGTGTAAAGGGCGAGTAGGCGGATTGGCAAGTTGGGAGTGAAATGTCGGGGCTTAACCCCGGAACTG
ASV33033	752	0.478649	TRUE	TRUE	USA (Urban)	d__Bacteria	Firmicutes	Peptostreptococcales-Tissierellales	Peptostreptococcales-Tissierellales	Peptoniphilus	Human (USA/Malawi/Venezuela)	TACGTAGGGGGCTAGCGTTGTCCGGAATCACTGGGCGTAAAGGGTTCGCAGGCGGAAATGCAAGTCAGATGTAAAAGGCAGTAGCTTAACTACTGTAAGC
ASV33033	518	0.0604904	TRUE	FALSE	Venezuela (Rural)	d__Bacteria	Firmicutes	Peptostreptococcales-Tissierellales	Peptostreptococcales-Tissierellales	Peptoniphilus	Human (USA/Malawi/Venezuela)	TACGTAGGGGGCTAGCGTTGTCCGGAATCACTGGGCGTAAAGGGTTCGCAGGCGGAAATGCAAGTCAGATGTAAAAGGCAGTAGCTTAACTACTGTAAGC
ASV33045	440	-0.0801364	TRUE	FALSE	USA (Urban)	d__Bacteria	Actinobacteriota	Coriobacteriales	Coriobacteriaceae	Collinsella	Human (USA/Malawi/Venezuela)	TACGTAGGGGGCGAGCGTTATCCGGATTCATTGGGCGTAAAGCGCGCGTAGGCGGCCCGGCAGGCCGGGGGTCGAAGCGGGGGGGTCAACCCCCCGAAGC
ASV33045	489	0.040187	TRUE	FALSE	USA (Urban)	d__Bacteria	Actinobacteriota	Coriobacteriales	Coriobacteriaceae	Collinsella	Human (USA/Malawi/Venezuela)	TACGTAGGGGGCGAGCGTTATCCGGATTCATTGGGCGTAAAGCGCGCGTAGGCGGCCCGGCAGGCCGGGGGTCGAAGCGGGGGGGTCAACCCCCCGAAGC
ASV33238	703	-0.854044	TRUE	TRUE	USA (Urban)	d__Bacteria	Firmicutes	Oscillospirales	Oscillospiraceae	Colidextribacter	Human (USA/Malawi/Venezuela)	TACGTAGGTGGCAAGCGTTATCCGGATTTACTGGGTGTAAAGGGCGTGTAGGCGGGATCGCAAGTCAGATGTGAAAACTGGAGGCTCAACCTCCAGCCTG
ASV33238	756	0.722389	TRUE	TRUE	USA (Urban)	d__Bacteria	Firmicutes	Oscillospirales	Oscillospiraceae	Colidextribacter	Human (USA/Malawi/Venezuela)	TACGTAGGTGGCAAGCGTTATCCGGATTTACTGGGTGTAAAGGGCGTGTAGGCGGGATCGCAAGTCAGATGTGAAAACTGGAGGCTCAACCTCCAGCCTG
ASV33274	573	-0.737745	TRUE	FALSE	Malawi (Rural)	d__Bacteria	Firmicutes	Peptococcales	Peptococcaceae	uncultured	Human (USA/Malawi/Venezuela)	TACGTAGGGAGCAAGCGTTGTCCGGAATTACTGGGCGTAAAGGGCGCGTAGGTGGATGTTTAAGTCAGATGTGAAAACTCCGGGCTCAACTTGGAGACTG
ASV33279	806	1.09541	TRUE	TRUE	USA (Urban)	d__Bacteria	Firmicutes	Clostridia_vadinBB60_group	Clostridia_vadinBB60_group	Clostridia_vadinBB60_group	Human (USA/Malawi/Venezuela)	TACGTAGGGGGCAAGCGTTGTCCGGAATGACTGGGCGTAAAGGGAGTGTAGGTGGCATAATAAGTTATATGTGAAAGCCCGTGGCTTAACTGCGGAACTG
ASV33316	808	0.570352	TRUE	TRUE	USA (Urban)	d__Bacteria	Actinobacteriota	Coriobacteriales	Atopobiaceae	Olsenella	Human (USA/Malawi/Venezuela)	TACGTAGGGGGCGAGCGTTATCCGGATTCATTGGGCGTAAAGCGCTCGTAGGCTGCCCGCTAGGTCCGGGGTCAAATCCGGGGGCTCAACCCCCGCACGC
ASV33316	774	-0.258113	TRUE	TRUE	USA (Urban)	d__Bacteria	Actinobacteriota	Coriobacteriales	Atopobiaceae	Olsenella	Human (USA/Malawi/Venezuela)	TACGTAGGGGGCGAGCGTTATCCGGATTCATTGGGCGTAAAGCGCTCGTAGGCTGCCCGCTAGGTCCGGGGTCAAATCCGGGGGCTCAACCCCCGCACGC
ASV3333	829	-0.764686	TRUE	TRUE	Malawi (Rural)	d__Bacteria	Firmicutes	Lachnospirales	Lachnospiraceae	NA	Human (USA/Malawi/Venezuela)	TACGTAGGGGGCAAGCGTTATCCGGATTTACTGGGTGTAAAGGGAGCGTAGACGGTTAAGCAAGTCAGAAGTGAAAGGCTGGGGCTCAACCCCGGGACTG
ASV3333	691	-0.241582	TRUE	TRUE	USA (Urban)	d__Bacteria	Firmicutes	Lachnospirales	Lachnospiraceae	NA	Human (USA/Malawi/Venezuela)	TACGTAGGGGGCAAGCGTTATCCGGATTTACTGGGTGTAAAGGGAGCGTAGACGGTTAAGCAAGTCAGAAGTGAAAGGCTGGGGCTCAACCCCGGGACTG
ASV33337	769	-0.0198691	TRUE	TRUE	Malawi (Rural)	d__Bacteria	Firmicutes	Oscillospirales	Ruminococcaceae	uncultured	Human (USA/Malawi/Venezuela)	TACGTAGGGAGCAAGCGTTGTCCGGATTTACTGGGTGTAAAGGGTGCGTAGGCGGAACTGCAAGTCAGTGGTGAAATCTGAGGGCTCAACCCTCAAACTG
ASV33337	723	0.0105598	TRUE	TRUE	Venezuela (Rural)	d__Bacteria	Firmicutes	Oscillospirales	Ruminococcaceae	uncultured	Human (USA/Malawi/Venezuela)	TACGTAGGGAGCAAGCGTTGTCCGGATTTACTGGGTGTAAAGGGTGCGTAGGCGGAACTGCAAGTCAGTGGTGAAATCTGAGGGCTCAACCCTCAAACTG
ASV33373	793	0.961246	TRUE	TRUE	Venezuela (Rural)	d__Bacteria	Firmicutes	Oscillospirales	Ruminococcaceae	Anaerotruncus	Human (USA/Malawi/Venezuela)	TACGTAGGGAGCAAGCGTTGTCCGGAATTACTGGGTGTAAAGGGAGCGTAGGCGGGATGGCAAGTAGAATGTTAAATCCATCGGCTCAACCGGTGGCTGC
ASV33373	825	-1.10507	TRUE	TRUE	Malawi (Rural)	d__Bacteria	Firmicutes	Oscillospirales	Ruminococcaceae	Anaerotruncus	Human (USA/Malawi/Venezuela)	TACGTAGGGAGCAAGCGTTGTCCGGAATTACTGGGTGTAAAGGGAGCGTAGGCGGGATGGCAAGTAGAATGTTAAATCCATCGGCTCAACCGGTGGCTGC
ASV33424	655	0.0583432	TRUE	TRUE	USA (Urban)	d__Bacteria	Firmicutes	Peptostreptococcales-Tissierellales	Peptostreptococcaceae	Romboutsia	Human (USA/Malawi/Venezuela)	TACGTAGGGGGCTAGCGTTATCCGGAATTACTGGGCGTAAGGGTGCGTAGGTGGTTTCTTAAGTCAGAGGTGAAAGGCTACGGCTCAACCGTAGTAAGCC
ASV33424	446	0.296797	TRUE	FALSE	Venezuela (Rural)	d__Bacteria	Firmicutes	Peptostreptococcales-Tissierellales	Peptostreptococcaceae	Romboutsia	Human (USA/Malawi/Venezuela)	TACGTAGGGGGCTAGCGTTATCCGGAATTACTGGGCGTAAGGGTGCGTAGGTGGTTTCTTAAGTCAGAGGTGAAAGGCTACGGCTCAACCGTAGTAAGCC
ASV33428	672	0.585815	TRUE	TRUE	Venezuela (Rural)	d__Bacteria	Firmicutes	Erysipelotrichales	Erysipelotrichaceae	Merdibacter	Human (USA/Malawi/Venezuela)	TACGTAGGTGGCGAGCGTTATCCGGAATGATTGGGCGTAAAGGGTGCGTAGGTGGCACGATAAGTCTGGAGTAAAAGGGAGCGGCTCAACCGCTGTTGGC
ASV33428	748	-0.636275	TRUE	TRUE	Malawi (Rural)	d__Bacteria	Firmicutes	Erysipelotrichales	Erysipelotrichaceae	Merdibacter	Human (USA/Malawi/Venezuela)	TACGTAGGTGGCGAGCGTTATCCGGAATGATTGGGCGTAAAGGGTGCGTAGGTGGCACGATAAGTCTGGAGTAAAAGGGAGCGGCTCAACCGCTGTTGGC
ASV33452	523	0.126287	TRUE	FALSE	USA (Urban)	d__Bacteria	Firmicutes	Christensenellales	Christensenellaceae	Christensenellaceae_R-7_group	Human (USA/Malawi/Venezuela)	TACGTAGGGGGCAAGCGTTGTCCGGAATGATTGGGCGTAAAGGGCGTGTAGGCGGCGATTTAAGTCTGGAGTGAAAGTCCTGCTTTTAAGGTGGGAATTG
ASV33542	801	1.00423	TRUE	TRUE	USA (Urban)	d__Bacteria	Firmicutes	Clostridia_vadinBB60_group	Clostridia_vadinBB60_group	Clostridia_vadinBB60_group	Human (USA/Malawi/Venezuela)	TACGTAGGTGGCAAGCGTTGTCCGGAATGACTGGGCGTAAAGGGTGCGTAGGTGGTTGGTCAAGTTAGTAGTGAAATTCCGGGGCTTAACTTCGGCGCTA
ASV33550	788	0.156996	TRUE	TRUE	USA (Urban)	d__Bacteria	Firmicutes	Clostridia_vadinBB60_group	Clostridia_vadinBB60_group	Clostridia_vadinBB60_group	Human (USA/Malawi/Venezuela)	TACGTAGGGGGCAAGCGTTGTCCGGAATGACTGGGCGTAAAGGGTGTGTAGGCGGGCTCGCAAGTTGGATGTGTAATACCCAGAGCTTAACTCGGGTGCT
ASV33550	822	0.866066	TRUE	TRUE	Venezuela (Rural)	d__Bacteria	Firmicutes	Clostridia_vadinBB60_group	Clostridia_vadinBB60_group	Clostridia_vadinBB60_group	Human (USA/Malawi/Venezuela)	TACGTAGGGGGCAAGCGTTGTCCGGAATGACTGGGCGTAAAGGGTGTGTAGGCGGGCTCGCAAGTTGGATGTGTAATACCCAGAGCTTAACTCGGGTGCT
ASV33556	683	-0.0311276	TRUE	TRUE	Malawi (Rural)	d__Bacteria	Firmicutes	Lactobacillales	Lactobacillaceae	Lactobacillus	Human (USA/Malawi/Venezuela)	TACGTAGGTGGCAAGCGTTGTCCGGATTTATTGGGCGTAAAGCGAGCGCAGGCGGAAGAATAAGTCTGATGTGAAAGCCCTCGGCTTAACCGAGGAACTG
ASV33556	561	0.0467258	TRUE	FALSE	Venezuela (Rural)	d__Bacteria	Firmicutes	Lactobacillales	Lactobacillaceae	Lactobacillus	Human (USA/Malawi/Venezuela)	TACGTAGGTGGCAAGCGTTGTCCGGATTTATTGGGCGTAAAGCGAGCGCAGGCGGAAGAATAAGTCTGATGTGAAAGCCCTCGGCTTAACCGAGGAACTG
ASV33570	467	-0.0385371	TRUE	FALSE	Malawi (Rural)	d__Bacteria	Firmicutes	Lachnospirales	Lachnospiraceae	[Ruminococcus]_gauvreauii_group	Human (USA/Malawi/Venezuela)	TACGTATGGAGCAAGCGTTATCCGGATTTACTGGGTGTAAAGGGAGCGTAGACGGTTGTGCAAGTCTGATGTGAAATTCCAGGGCTTAACCCTGGACCTG
ASV33592	683	0.23237	TRUE	TRUE	USA (Urban)	d__Bacteria	Bacteroidota	Bacteroidales	Porphyromonadaceae	Porphyromonas	Human (USA/Malawi/Venezuela)	TACGGAGGATGCGAGCGTTATCCGGAATTATTGGGTTTAAAGGGTGCGTAGGTTGCAAGGGAAGTCAGGGGTGAAAAGCTATAGCTCAACTATGGTCTTG
ASV33592	496	0.048572	TRUE	FALSE	Venezuela (Rural)	d__Bacteria	Bacteroidota	Bacteroidales	Porphyromonadaceae	Porphyromonas	Human (USA/Malawi/Venezuela)	TACGGAGGATGCGAGCGTTATCCGGAATTATTGGGTTTAAAGGGTGCGTAGGTTGCAAGGGAAGTCAGGGGTGAAAAGCTATAGCTCAACTATGGTCTTG
ASV33630	774	-0.375725	TRUE	TRUE	USA (Urban)	d__Bacteria	Firmicutes	Christensenellales	Christensenellaceae	Christensenellaceae_R-7_group	Human (USA/Malawi/Venezuela)	TACGTAGGGGGCGAGCGTTGTCCGGAATGACTGGGCGTAAAGGGCGTGTAGGCGGCCGACTAAGTCTGATGTGAAATACCCGCTTTTAAGGTGGGTCGTG
ASV33630	792	0.746819	TRUE	TRUE	USA (Urban)	d__Bacteria	Firmicutes	Christensenellales	Christensenellaceae	Christensenellaceae_R-7_group	Human (USA/Malawi/Venezuela)	TACGTAGGGGGCGAGCGTTGTCCGGAATGACTGGGCGTAAAGGGCGTGTAGGCGGCCGACTAAGTCTGATGTGAAATACCCGCTTTTAAGGTGGGTCGTG
ASV3364	468	-0.239231	TRUE	FALSE	Malawi (Rural)	d__Bacteria	Firmicutes	Lactobacillales	Streptococcaceae	Streptococcus	Human (USA/Malawi/Venezuela)	TACGTAGGTCCCGAGCGTTGTCCGGATTTATTGGGCGTAAAGGGAGCGCAGGCGGTCAGGAAAGTCTGGAGTAAAAGGCTATGGCTCAACCATAGTGTGC
ASV3364	503	0.321833	TRUE	FALSE	Venezuela (Rural)	d__Bacteria	Firmicutes	Lactobacillales	Streptococcaceae	Streptococcus	Human (USA/Malawi/Venezuela)	TACGTAGGTCCCGAGCGTTGTCCGGATTTATTGGGCGTAAAGGGAGCGCAGGCGGTCAGGAAAGTCTGGAGTAAAAGGCTATGGCTCAACCATAGTGTGC
ASV33664	790	0.458135	TRUE	TRUE	USA (Urban)	d__Bacteria	Firmicutes	RF39	RF39	RF39	Human (USA/Malawi/Venezuela)	TACGTAGGTGGCGAGCGTTATCCGAATTTATTGGGCGTAAAGCGTGCGCAGACGGTTTATTAAGTCTAGAATCAAAGCCCGAAGCTTAACTTCGGTTCGT
ASV33684	808	-2.74341	TRUE	TRUE	USA (Urban)	d__Bacteria	Bacteroidota	Bacteroidales	Tannerellaceae	Parabacteroides	Human (USA/Malawi/Venezuela)	TACGGAGGATGCGAGCGTTATCCGGATTTATTGGGTTTAAAGGGTGCGTAGGTGGTGATTTAAGTCAGCGGTGAAAGTTTGTGGCTCAACCATAAAATTG
ASV33684	861	2.90182	TRUE	TRUE	USA (Urban)	d__Bacteria	Bacteroidota	Bacteroidales	Tannerellaceae	Parabacteroides	Human (USA/Malawi/Venezuela)	TACGGAGGATGCGAGCGTTATCCGGATTTATTGGGTTTAAAGGGTGCGTAGGTGGTGATTTAAGTCAGCGGTGAAAGTTTGTGGCTCAACCATAAAATTG
ASV33697	661	-1.84563	TRUE	TRUE	USA (Urban)	d__Bacteria	Bacteroidota	Bacteroidales	Bacteroidaceae	Bacteroides	Human (USA/Malawi/Venezuela)	TACGGAGGATCCGAGCGTTATCCGGATTTATTGGGTTTAAAGGGAGCGTAGGTGGACAGTTAAGTCAGTTGTGAAAGTTTGCGGCTCAACCGTAAAATTG
ASV33697	681	1.96603	TRUE	TRUE	USA (Urban)	d__Bacteria	Bacteroidota	Bacteroidales	Bacteroidaceae	Bacteroides	Human (USA/Malawi/Venezuela)	TACGGAGGATCCGAGCGTTATCCGGATTTATTGGGTTTAAAGGGAGCGTAGGTGGACAGTTAAGTCAGTTGTGAAAGTTTGCGGCTCAACCGTAAAATTG
ASV33757	601	-0.115504	TRUE	FALSE	Malawi (Rural)	d__Bacteria	Firmicutes	Peptococcales	Peptococcaceae	uncultured	Human (USA/Malawi/Venezuela)	TACGTAGGGAGCGAGCGTTGTCCGGAATTACTGGGCGTAAAGGGCGTGTAGGCGGGAATTTAAGTAAGGTGTGAAAACTCCGGGCTTAACCTGGAGACTG
ASV33776	508	-0.823252	TRUE	FALSE	Malawi (Rural)	d__Bacteria	Firmicutes	Oscillospirales	Ruminococcaceae	NA	Human (USA/Malawi/Venezuela)	TACGTAGGTGGCGAGCGTTGTCCGGAATTACTGGGTGTAAAGGGAGCGTAGGCGGGAGTGCAAGTTGAATGTGAAATCTATCGGCTCAACCGGTAGCTGC
ASV34111	435	0.241188	TRUE	FALSE	Venezuela (Rural)	d__Bacteria	Actinobacteriota	Coriobacteriales	Coriobacteriaceae	Collinsella	Human (USA/Malawi/Venezuela)	TACGTAGGGGGCGAGCGTTATCCGGATTCATTGGGCGTAAAGCGCGCGTAGGCGGCCCGGCAGGCCGGGGGGCGAAGCGGGGGGGTCAACCCCCCGAAGC
ASV34111	644	-1.0459	TRUE	TRUE	Malawi (Rural)	d__Bacteria	Actinobacteriota	Coriobacteriales	Coriobacteriaceae	Collinsella	Human (USA/Malawi/Venezuela)	TACGTAGGGGGCGAGCGTTATCCGGATTCATTGGGCGTAAAGCGCGCGTAGGCGGCCCGGCAGGCCGGGGGGCGAAGCGGGGGGGTCAACCCCCCGAAGC
ASV34272	481	0.0148556	TRUE	FALSE	USA (Urban)	d__Bacteria	Firmicutes	Lachnospirales	Lachnospiraceae	GCA-900066575	Human (USA/Malawi/Venezuela)	TACGTAGGGGGCAAGCGTTATCCGGATTTACTGGGTGTAAAGGGAGCGTAGGCGGTCTGACAAGTCAGAAGTGAAAGCCCGGGGCTCAACCTCGGGACTG
ASV34292	850	5.54024	TRUE	TRUE	Venezuela (Rural)	d__Bacteria	Bacteroidota	Bacteroidales	Prevotellaceae	Prevotella	Human (USA/Malawi/Venezuela)	TACGGAAGGTCCGGGCGTTATCCGGATTTATTGGGTTTAAAGGGAGCGTAGGCCGGAGATTAAGCGTGTTGTGAAATGTAGATGCTCAACATCTGCACTG
ASV34292	875	-7.39461	TRUE	TRUE	Malawi (Rural)	d__Bacteria	Bacteroidota	Bacteroidales	Prevotellaceae	Prevotella	Human (USA/Malawi/Venezuela)	TACGGAAGGTCCGGGCGTTATCCGGATTTATTGGGTTTAAAGGGAGCGTAGGCCGGAGATTAAGCGTGTTGTGAAATGTAGATGCTCAACATCTGCACTG
ASV34325	548	-0.391389	TRUE	FALSE	Malawi (Rural)	d__Bacteria	Firmicutes	Oscillospirales	Oscillospiraceae	Papillibacter	Human (USA/Malawi/Venezuela)	TACGTAGGTGGCAAGCGTTGTCCGGATTTACTGGGTGTAAAGGGCGCGTAGGCGGGTAGGCAAGTCAGATGTGAAATACCGGGGCTTAACTCCGGGGCTG
ASV34354	444	-2.2116	TRUE	FALSE	Malawi (Rural)	d__Bacteria	Bacteroidota	Bacteroidales	Prevotellaceae	Prevotella	Human (USA/Malawi/Venezuela)	TACGGAAGGTCCGGGCGTTATCCGGATTTATTGGGTTTAAAGGGAGCGTAGGCCGGAGATTAAGCGTGTTGTGAAATGTAGATGCTCAACATCTGAACTG
ASV34355	712	-2.14777	TRUE	TRUE	USA (Urban)	d__Bacteria	Bacteroidota	Bacteroidales	Marinifilaceae	Odoribacter	Human (USA/Malawi/Venezuela)	TACGGAGGATGCGAGCGTTATCCGGATTTATTGGGTTTAAAGGGTGCGTAGGCGGTTTATTAAGTTAGTGGTTAAATATTTGAGCTAAACTCAATTGTGC
ASV34355	817	1.80162	TRUE	TRUE	USA (Urban)	d__Bacteria	Bacteroidota	Bacteroidales	Marinifilaceae	Odoribacter	Human (USA/Malawi/Venezuela)	TACGGAGGATGCGAGCGTTATCCGGATTTATTGGGTTTAAAGGGTGCGTAGGCGGTTTATTAAGTTAGTGGTTAAATATTTGAGCTAAACTCAATTGTGC
ASV34358	748	0.404938	TRUE	TRUE	USA (Urban)	d__Bacteria	Actinobacteriota	Actinomycetales	Actinomycetaceae	Actinomyces	Human (USA/Malawi/Venezuela)	TACGTAGGGCGCGAGCGTTGTCCGGAATTATTGGGCGTAAAGGGCTTGTAGGCGGTTGGTCGCGTCTGCCGTGAAATTCTCTGGCTTAACTGGGGGCGTG
ASV34358	441	0.0153422	TRUE	FALSE	Venezuela (Rural)	d__Bacteria	Actinobacteriota	Actinomycetales	Actinomycetaceae	Actinomyces	Human (USA/Malawi/Venezuela)	TACGTAGGGCGCGAGCGTTGTCCGGAATTATTGGGCGTAAAGGGCTTGTAGGCGGTTGGTCGCGTCTGCCGTGAAATTCTCTGGCTTAACTGGGGGCGTG
ASV3437	808	0.784016	TRUE	TRUE	USA (Urban)	d__Bacteria	Firmicutes	Peptococcales	Peptococcaceae	Peptococcus	Human (USA/Malawi/Venezuela)	TACGTAGGGGGCGAGCGTTGTCCGGAATCACTGGGCGTAAAGGGCGCGTAGGCGGCCTAGTAAGTCAGATGTGAAAAGTGAGGGCTCAACCCTTAGAGTG
ASV3437	787	-0.758537	TRUE	TRUE	USA (Urban)	d__Bacteria	Firmicutes	Peptococcales	Peptococcaceae	Peptococcus	Human (USA/Malawi/Venezuela)	TACGTAGGGGGCGAGCGTTGTCCGGAATCACTGGGCGTAAAGGGCGCGTAGGCGGCCTAGTAAGTCAGATGTGAAAAGTGAGGGCTCAACCCTTAGAGTG
ASV34374	831	1.1643	TRUE	TRUE	Venezuela (Rural)	d__Bacteria	Firmicutes	Peptostreptococcales-Tissierellales	Anaerovoracaceae	Mogibacterium	Human (USA/Malawi/Venezuela)	TACGTAGGGGGCAAGCGTTATCCGGAATTATTGGGCGTAAAGAGTGCGTAGGTGGTTATCTAAGCGTAAGGTTTAAGCGTGCAGCTCAACTGCATCTCGC
ASV34374	806	-0.303835	TRUE	TRUE	Malawi (Rural)	d__Bacteria	Firmicutes	Peptostreptococcales-Tissierellales	Anaerovoracaceae	Mogibacterium	Human (USA/Malawi/Venezuela)	TACGTAGGGGGCAAGCGTTATCCGGAATTATTGGGCGTAAAGAGTGCGTAGGTGGTTATCTAAGCGTAAGGTTTAAGCGTGCAGCTCAACTGCATCTCGC
ASV34378	495	-0.24039	TRUE	FALSE	Malawi (Rural)	d__Bacteria	Firmicutes	RF39	RF39	RF39	Human (USA/Malawi/Venezuela)	TACGTAGGGAGCAAGCGTTATCCGGATTTATTGGGTGTAAAGGGTGCGTAGGCGGTTTATTAGGTCTATGGTTTAATTCCGAAGCTTAACTTCGGTTCGC
ASV34385	515	0.717448	TRUE	FALSE	USA (Urban)	d__Bacteria	Firmicutes	Lachnospirales	Lachnospiraceae	NA	Human (USA/Malawi/Venezuela)	TACGTATGGTGCAAGCGTTATCCGGATTTACTGGGTGTAAAGGGAGCGCAGGCGGTGCGGCAAGTCTGATGTGAAAGCCCGGGGCTCAACCCCGGGACTG
ASV3442	560	1.25927	TRUE	FALSE	USA (Urban)	d__Bacteria	Firmicutes	Erysipelotrichales	Erysipelotrichaceae	Turicibacter	Human (USA/Malawi/Venezuela)	TACGTAGGTGGCGAGCGTTATCCGGAATTATTGGGCGTAAAGAGCGCGCAGGTGGTTGATTAAGTCTGATGTGAAAGCCCACGGCTTAACCGTGGAGGGG
ASV3442	797	-1.73627	TRUE	TRUE	USA (Urban)	d__Bacteria	Firmicutes	Erysipelotrichales	Erysipelotrichaceae	Turicibacter	Human (USA/Malawi/Venezuela)	TACGTAGGTGGCGAGCGTTATCCGGAATTATTGGGCGTAAAGAGCGCGCAGGTGGTTGATTAAGTCTGATGTGAAAGCCCACGGCTTAACCGTGGAGGGG
ASV34458	774	-1.207	TRUE	TRUE	USA (Urban)	d__Bacteria	Actinobacteriota	Coriobacteriales	Coriobacteriaceae	Collinsella	Human (USA/Malawi/Venezuela)	TACGTAGGGGGCGAGCGTTATCCGGATTCATTGGGCGTAAAGCGCGCGTAGGCGGCCCGGCAGGCCGGGGGTCGAAGCGGGGGGCTCAAACCCCCGAAGC
ASV34487	694	0.256823	TRUE	TRUE	USA (Urban)	d__Bacteria	Firmicutes	Oscillospirales	Ruminococcaceae	CAG-352	Human (USA/Malawi/Venezuela)	TACGTAGGGAGCGAGCGTTGTCCGGATTTACTGGGTGTAAAGGGTGCGTAGGCGGCCGAGCAAGTCAGTTGTGAAAACTATGGGCTTAACCCATAACGTG
ASV34495	806	0.53445	TRUE	TRUE	Venezuela (Rural)	d__Bacteria	Firmicutes	Christensenellales	Christensenellaceae	Christensenellaceae_R-7_group	Human (USA/Malawi/Venezuela)	TACGTAGGGGGCGAGCGTTGTCCGGAATGATTGGGCGTAAAGGGCGCGTAGGCGGCCTGCTAAGTCTGGAGTGAAAGTCCTGCTTTCAAGGTGGGAAGTG
ASV34495	808	-0.168618	TRUE	TRUE	Malawi (Rural)	d__Bacteria	Firmicutes	Christensenellales	Christensenellaceae	Christensenellaceae_R-7_group	Human (USA/Malawi/Venezuela)	TACGTAGGGGGCGAGCGTTGTCCGGAATGATTGGGCGTAAAGGGCGCGTAGGCGGCCTGCTAAGTCTGGAGTGAAAGTCCTGCTTTCAAGGTGGGAAGTG
ASV34566	584	1.19168	TRUE	FALSE	USA (Urban)	d__Bacteria	Firmicutes	Lachnospirales	Lachnospiraceae	Blautia	Human (USA/Malawi/Venezuela)	TACGTAGGGGGCAAGCGTTATCCGGATTTACTGGGTGTAAAGGGAGCGTAGACGGACTGGCAAGTCTGATGTGAAAGGCGGGGGCTCAACCCCTGGACTG
ASV34566	604	-1.38765	TRUE	TRUE	USA (Urban)	d__Bacteria	Firmicutes	Lachnospirales	Lachnospiraceae	Blautia	Human (USA/Malawi/Venezuela)	TACGTAGGGGGCAAGCGTTATCCGGATTTACTGGGTGTAAAGGGAGCGTAGACGGACTGGCAAGTCTGATGTGAAAGGCGGGGGCTCAACCCCTGGACTG
ASV34581	433	0.613383	TRUE	FALSE	Venezuela (Rural)	d__Bacteria	Firmicutes	Christensenellales	Christensenellaceae	Christensenellaceae_R-7_group	Human (USA/Malawi/Venezuela)	TACGTAGGGGGCGAGCGTTGTCCGGAATTACTGGGCGTAAAGGGTGCGTAGGCGGTTTAACAAGTCCAATGTGAAATACCCGGGCTTAACCTGGGGGGTG
ASV34581	534	-0.620172	TRUE	FALSE	Malawi (Rural)	d__Bacteria	Firmicutes	Christensenellales	Christensenellaceae	Christensenellaceae_R-7_group	Human (USA/Malawi/Venezuela)	TACGTAGGGGGCGAGCGTTGTCCGGAATTACTGGGCGTAAAGGGTGCGTAGGCGGTTTAACAAGTCCAATGTGAAATACCCGGGCTTAACCTGGGGGGTG
ASV34582	797	0.549512	TRUE	TRUE	USA (Urban)	d__Bacteria	Firmicutes	Lachnospirales	Lachnospiraceae	Lachnospiraceae_ND3007_group	Human (USA/Malawi/Venezuela)	TACGTATGGTGCAAGCGTTATCCGGATTTACTGGGTGTAAAGGGAGTGTAGGTGGCATGGCAAGCCAGAAGTGAAAGCCCGTGGCTCAACTACGGGACTG
ASV34592	782	0.906543	TRUE	TRUE	Venezuela (Rural)	d__Bacteria	Bacteroidota	Bacteroidales	Prevotellaceae	Prevotella	Human (USA/Malawi/Venezuela)	TACGGAAGGTCCAGGCGTTATCCGGATTTATTGGGTTTAAAGGGAGCGTAGGCCGTTTGGTAAGCGTGTTGTGAAATGTCGGGGCTCAACCTGGGCATTG
ASV34592	731	-0.83015	TRUE	TRUE	Malawi (Rural)	d__Bacteria	Bacteroidota	Bacteroidales	Prevotellaceae	Prevotella	Human (USA/Malawi/Venezuela)	TACGGAAGGTCCAGGCGTTATCCGGATTTATTGGGTTTAAAGGGAGCGTAGGCCGTTTGGTAAGCGTGTTGTGAAATGTCGGGGCTCAACCTGGGCATTG
ASV3462	829	-0.921957	TRUE	TRUE	Malawi (Rural)	d__Bacteria	Firmicutes	Oscillospirales	Oscillospiraceae	NK4A214_group	Human (USA/Malawi/Venezuela)	TACGTAGGTGGCAAGCGTTATCCGGATTTACTGGGTGTAAAGGGCGCGTAGGCGGGGATGCAAGTCAGATGTGAAATCTATGGGCTTAACCCATAAACTG
ASV3462	831	1.55243	TRUE	TRUE	Venezuela (Rural)	d__Bacteria	Firmicutes	Oscillospirales	Oscillospiraceae	NK4A214_group	Human (USA/Malawi/Venezuela)	TACGTAGGTGGCAAGCGTTATCCGGATTTACTGGGTGTAAAGGGCGCGTAGGCGGGGATGCAAGTCAGATGTGAAATCTATGGGCTTAACCCATAAACTG
ASV34636	817	0.866165	TRUE	TRUE	Venezuela (Rural)	d__Bacteria	Firmicutes	Veillonellales-Selenomonadales	Veillonellaceae	Allisonella	Human (USA/Malawi/Venezuela)	TACGTAGGTGGCAAGCGTTGTCCGGAATTATTGGGCGTAAAGCGCGCGCAGGCGGCCGTGCAAGTCCATCTTAAAAGCGTGGGGCTTAACCCCATGAGGG
ASV34636	516	0.162961	TRUE	FALSE	USA (Urban)	d__Bacteria	Firmicutes	Veillonellales-Selenomonadales	Veillonellaceae	Allisonella	Human (USA/Malawi/Venezuela)	TACGTAGGTGGCAAGCGTTGTCCGGAATTATTGGGCGTAAAGCGCGCGCAGGCGGCCGTGCAAGTCCATCTTAAAAGCGTGGGGCTTAACCCCATGAGGG
ASV34665	849	2.58341	TRUE	TRUE	Venezuela (Rural)	d__Bacteria	Bacteroidota	Bacteroidales	Prevotellaceae	Prevotella	Human (USA/Malawi/Venezuela)	TACGGAAGGTCCGGGCGTTATCCGGATTTATTGGGTTTAAAGGGAGCGTAGGCCGTCTGTTAAGCGTGTTGTGAAATGTCGGGGCTCAACCTGGGCATTG
ASV34665	868	-2.28229	TRUE	TRUE	Malawi (Rural)	d__Bacteria	Bacteroidota	Bacteroidales	Prevotellaceae	Prevotella	Human (USA/Malawi/Venezuela)	TACGGAAGGTCCGGGCGTTATCCGGATTTATTGGGTTTAAAGGGAGCGTAGGCCGTCTGTTAAGCGTGTTGTGAAATGTCGGGGCTCAACCTGGGCATTG
ASV3468	787	1.01902	TRUE	TRUE	USA (Urban)	d__Bacteria	Firmicutes	Oscillospirales	Ruminococcaceae	uncultured	Human (USA/Malawi/Venezuela)	TACGTAGGTGGCAAGCGTTGTCCGGAATTACTGGGTGTAAAGGGAGCGTAGGCGGGCAGGCAAGTCAGGCGTGAAATATATCGGCTCAACCGGTATCTGC
ASV3468	781	-0.501071	TRUE	TRUE	USA (Urban)	d__Bacteria	Firmicutes	Oscillospirales	Ruminococcaceae	uncultured	Human (USA/Malawi/Venezuela)	TACGTAGGTGGCAAGCGTTGTCCGGAATTACTGGGTGTAAAGGGAGCGTAGGCGGGCAGGCAAGTCAGGCGTGAAATATATCGGCTCAACCGGTATCTGC
ASV34894	689	0.498153	TRUE	TRUE	USA (Urban)	d__Bacteria	Fusobacteriota	Fusobacteriales	Fusobacteriaceae	Fusobacterium	Human (USA/Malawi/Venezuela)	TACGTATGTCACGAGCGTTATCCGGATTTATTGGGCGTAAAGCGCGTCTAGGTGGTTATGTAAGTCTGATGTGAAAATGCAGGGCTCAACTCTGTATTGC
ASV34894	651	-0.354881	TRUE	TRUE	USA (Urban)	d__Bacteria	Fusobacteriota	Fusobacteriales	Fusobacteriaceae	Fusobacterium	Human (USA/Malawi/Venezuela)	TACGTATGTCACGAGCGTTATCCGGATTTATTGGGCGTAAAGCGCGTCTAGGTGGTTATGTAAGTCTGATGTGAAAATGCAGGGCTCAACTCTGTATTGC
ASV3491	553	0.0492468	TRUE	FALSE	Venezuela (Rural)	d__Bacteria	Firmicutes	NA	NA	NA	Human (USA/Malawi/Venezuela)	TACGTAGGGGGCGAGCGTTGTCCGGAATTATTGGGCGTAAAGGGTGCGTAGGCGGCCAAGTAAGTCAGATGTGAAATGCCAGGGCTTAACCCTGGAGCTG
ASV34937	739	-0.261523	TRUE	TRUE	USA (Urban)	d__Bacteria	Firmicutes	Lachnospirales	Lachnospiraceae	NA	Human (USA/Malawi/Venezuela)	TACGTATGGAGCAAGCGTTATCCGGATTTACTGGGTGTAAAGGGAGCGTAGGCGGTCCTGCAAGTCTGATGTGAAAACCCGGGGCTCAACCCCGGGACTG
ASV34937	736	0.00648022	TRUE	TRUE	USA (Urban)	d__Bacteria	Firmicutes	Lachnospirales	Lachnospiraceae	NA	Human (USA/Malawi/Venezuela)	TACGTATGGAGCAAGCGTTATCCGGATTTACTGGGTGTAAAGGGAGCGTAGGCGGTCCTGCAAGTCTGATGTGAAAACCCGGGGCTCAACCCCGGGACTG
ASV3507	518	0.107247	TRUE	FALSE	USA (Urban)	d__Bacteria	Bacteroidota	Bacteroidales	Prevotellaceae	Paraprevotella	Human (USA/Malawi/Venezuela)	TACGGAAGATGCGAGCGTTATCCGGATTTATTGGGTTTAAAGGGAGCGTAGGCGGGCTTTTAAGTCAGCGGTCAAATGTCACGGCTCAACCGTGGCCAGC
ASV35100	491	-0.878041	TRUE	FALSE	Malawi (Rural)	d__Bacteria	Actinobacteriota	Micrococcales	Micrococcaceae	Rothia	Human (USA/Malawi/Venezuela)	TACGTAGGGCGCGAGCGTTGTCCGGAATTATTGGGCGTAAAGAGCTTGTAGGCGGTTGGTCGCGTCTGCTGTGAAAGGCTGGGGCTTAACCCTGGTTTTG
ASV35238	487	0.355567	TRUE	FALSE	USA (Urban)	d__Bacteria	Firmicutes	Lachnospirales	Lachnospiraceae	Tyzzerella	Human (USA/Malawi/Venezuela)	TACGTATGGTGCAAGCGTTATCCGGATTTACTGGGTGTAAAGGGAGCGTAGACGGTTGTGTAAGTCTGATGTGAAAGCCCGGGGCTCAACCCCGGGACTG
ASV35273	717	0.356107	TRUE	TRUE	Venezuela (Rural)	d__Bacteria	Firmicutes	Lachnospirales	Defluviitaleaceae	Defluviitaleaceae_UCG-011	Human (USA/Malawi/Venezuela)	TACGTAGGGGGCAAGCGTTATCCGGAATTACTGGGTGTAAAGGGTGCGTAGGCGGCCCGGCAAGTTTGATGTGAAACCCATAGGCTTAACCTGTGGCATG
ASV35273	778	-0.368124	TRUE	TRUE	Malawi (Rural)	d__Bacteria	Firmicutes	Lachnospirales	Defluviitaleaceae	Defluviitaleaceae_UCG-011	Human (USA/Malawi/Venezuela)	TACGTAGGGGGCAAGCGTTATCCGGAATTACTGGGTGTAAAGGGTGCGTAGGCGGCCCGGCAAGTTTGATGTGAAACCCATAGGCTTAACCTGTGGCATG
ASV35315	466	-0.0128736	TRUE	FALSE	Malawi (Rural)	d__Bacteria	Firmicutes	Christensenellales	Christensenellaceae	Christensenellaceae_R-7_group	Human (USA/Malawi/Venezuela)	TACGTAGGGGGCAAGCGTTGTCCGGAATGATTGGGCGTAAAGGGCGCGTAGGCGGCCTGATAAGTTTGAAGTGAAAGTCCTTCTTTTAAGGAGGGAACTG
ASV35340	690	1.70264	TRUE	TRUE	Venezuela (Rural)	d__Bacteria	Firmicutes	Oscillospirales	Oscillospiraceae	UCG-002	Human (USA/Malawi/Venezuela)	TACGTAGGTGGCAAGCGTTGTCCGGATTTACTGGGTGTAAAGGGCGTGCAGCCGGGTCTGCAAGTCAGATGTGAAATCCATGGGCTCAACCCATGAACTG
ASV35340	554	-0.162995	TRUE	FALSE	Malawi (Rural)	d__Bacteria	Firmicutes	Oscillospirales	Oscillospiraceae	UCG-002	Human (USA/Malawi/Venezuela)	TACGTAGGTGGCAAGCGTTGTCCGGATTTACTGGGTGTAAAGGGCGTGCAGCCGGGTCTGCAAGTCAGATGTGAAATCCATGGGCTCAACCCATGAACTG
ASV35346	859	2.11082	TRUE	TRUE	USA (Urban)	d__Bacteria	Firmicutes	Lachnospirales	Lachnospiraceae	[Ruminococcus]_torques_group	Human (USA/Malawi/Venezuela)	TACGTATGGTGCAAGCGTTATCCGGATTTACTGGGTGTAAAGGGAGCGTAGACGGATGGGCAAGTCTGATGTGAAAACCCGGGGCTCAACCCCGGGACTG
ASV35346	830	-2.09779	TRUE	TRUE	USA (Urban)	d__Bacteria	Firmicutes	Lachnospirales	Lachnospiraceae	[Ruminococcus]_torques_group	Human (USA/Malawi/Venezuela)	TACGTATGGTGCAAGCGTTATCCGGATTTACTGGGTGTAAAGGGAGCGTAGACGGATGGGCAAGTCTGATGTGAAAACCCGGGGCTCAACCCCGGGACTG
ASV35442	550	-0.372522	TRUE	FALSE	Malawi (Rural)	d__Bacteria	Firmicutes	Lactobacillales	Leuconostocaceae	Leuconostoc	Human (USA/Malawi/Venezuela)	TACGTATGTCCCGAGCGTTATCCGGATTTATTGGGCGTAAAGCGAGCGCAGACGGTTAATTAAGTCTGATGTGAAAGCCCGGAGCTCAACTCCGGAAAGG
ASV35442	439	0.368475	TRUE	FALSE	Venezuela (Rural)	d__Bacteria	Firmicutes	Lactobacillales	Leuconostocaceae	Leuconostoc	Human (USA/Malawi/Venezuela)	TACGTATGTCCCGAGCGTTATCCGGATTTATTGGGCGTAAAGCGAGCGCAGACGGTTAATTAAGTCTGATGTGAAAGCCCGGAGCTCAACTCCGGAAAGG
ASV35475	705	-0.608743	TRUE	TRUE	Malawi (Rural)	d__Bacteria	Firmicutes	NA	NA	NA	Human (USA/Malawi/Venezuela)	TACGTAGGGAGCAAGCGTTGTCCGGAATTACTGGGCGTAAAGGGTGCGTAGGCGGTTTGTCAAGTCGAATGTGAAATACCGGGGCTCAACCCCGGGGCTG
ASV35475	565	0.0884987	TRUE	FALSE	Venezuela (Rural)	d__Bacteria	Firmicutes	NA	NA	NA	Human (USA/Malawi/Venezuela)	TACGTAGGGAGCAAGCGTTGTCCGGAATTACTGGGCGTAAAGGGTGCGTAGGCGGTTTGTCAAGTCGAATGTGAAATACCGGGGCTCAACCCCGGGGCTG
ASV35484	450	0.373785	TRUE	FALSE	Venezuela (Rural)	d__Bacteria	Firmicutes	Peptostreptococcales-Tissierellales	Peptostreptococcaceae	Romboutsia	Human (USA/Malawi/Venezuela)	TACGTAGGGGCTAGCGTTATCCGGAATTACTGGGCGTAAAGGGTGCGTAGGTGGTTTCTTAAGTCAGAGGTGAAAGGCTACGGCTCAACCGTAGTAAGCC
ASV35484	612	-0.196268	TRUE	FALSE	Malawi (Rural)	d__Bacteria	Firmicutes	Peptostreptococcales-Tissierellales	Peptostreptococcaceae	Romboutsia	Human (USA/Malawi/Venezuela)	TACGTAGGGGCTAGCGTTATCCGGAATTACTGGGCGTAAAGGGTGCGTAGGTGGTTTCTTAAGTCAGAGGTGAAAGGCTACGGCTCAACCGTAGTAAGCC
ASV35526	518	-0.667888	TRUE	FALSE	Malawi (Rural)	d__Bacteria	Firmicutes	Peptococcales	Peptococcaceae	NA	Human (USA/Malawi/Venezuela)	TACGTAGGGAGCAAGCGTTGTCCGGAATTACTGGGCGTAAAGGGCGCGTAGGCGGGAATTTAAGTTAGATGTGAAAACTAAGGGCTCAACCTTTAGACTG
ASV35537	505	0.0866768	TRUE	FALSE	USA (Urban)	d__Bacteria	Firmicutes	NA	NA	NA	Human (USA/Malawi/Venezuela)	TACGTAGGTGGCAAGCGTTGTCCGGATTTACTGGGTGTAAAGGGCGTGTAGGCGGGTTTGCAAGTCAGATGTGAAATACCGGGGCTTAACTCCGGAACTG
ASV35552	696	1.06792	TRUE	TRUE	Venezuela (Rural)	d__Bacteria	Firmicutes	Oscillospirales	Oscillospiraceae	UCG-005	Human (USA/Malawi/Venezuela)	TACGTAGGTTGCAAGCGTTGTCCGGATTTACTGGGTGTAAAGGGCGTGTAGGCGGAGATGCAAGTTGGGAGTGAAATCCATGGGCTCAACCCATGAACTG
ASV35552	674	-1.13114	TRUE	TRUE	Malawi (Rural)	d__Bacteria	Firmicutes	Oscillospirales	Oscillospiraceae	UCG-005	Human (USA/Malawi/Venezuela)	TACGTAGGTTGCAAGCGTTGTCCGGATTTACTGGGTGTAAAGGGCGTGTAGGCGGAGATGCAAGTTGGGAGTGAAATCCATGGGCTCAACCCATGAACTG
ASV35564	769	0.147656	TRUE	TRUE	USA (Urban)	d__Bacteria	Firmicutes	Oscillospirales	Ruminococcaceae	Subdoligranulum	Human (USA/Malawi/Venezuela)	AACGTAGGGTGCAAGCGTTGTCCGGAATTACTGGGTGTAAAGGGAGCGCAGGCGGACCGGCAAGTTGGAAGTGAAAACCATAGGCTCAACCTATGGATTG
ASV35570	760	-0.187072	TRUE	TRUE	USA (Urban)	d__Bacteria	Firmicutes	Oscillospirales	UCG-010	UCG-010	Human (USA/Malawi/Venezuela)	TACGTAGGTGGCAAGCGTTATCCGGATTTACTGGGTGTAAAGGGTGTGTAGGCGGGACGACAAGTCAGATGTGAAACTCATGGGCTCAACCCATGACCTG
ASV35570	787	0.336644	TRUE	TRUE	USA (Urban)	d__Bacteria	Firmicutes	Oscillospirales	UCG-010	UCG-010	Human (USA/Malawi/Venezuela)	TACGTAGGTGGCAAGCGTTATCCGGATTTACTGGGTGTAAAGGGTGTGTAGGCGGGACGACAAGTCAGATGTGAAACTCATGGGCTCAACCCATGACCTG
ASV35577	744	0.375311	TRUE	TRUE	USA (Urban)	d__Bacteria	Firmicutes	Oscillospirales	Oscillospiraceae	UCG-005	Human (USA/Malawi/Venezuela)	TACGTAGGTGGCAAGCGTTGTCCGGATTTACTGGGTGTAAAGGGCGTGTAGGCGGGAGAGCAAGTCAGAAGTGAAATCCATGGGCTTAACCCATGAACTG
ASV35577	711	-0.175248	TRUE	TRUE	USA (Urban)	d__Bacteria	Firmicutes	Oscillospirales	Oscillospiraceae	UCG-005	Human (USA/Malawi/Venezuela)	TACGTAGGTGGCAAGCGTTGTCCGGATTTACTGGGTGTAAAGGGCGTGTAGGCGGGAGAGCAAGTCAGAAGTGAAATCCATGGGCTTAACCCATGAACTG
ASV35596	798	0.946842	TRUE	TRUE	USA (Urban)	d__Bacteria	Desulfobacterota	Desulfovibrionales	Desulfovibrionaceae	uncultured	Human (USA/Malawi/Venezuela)	TACGGAGGGTGCGAGCGTTAATCGGAATTACTGGGCGTAAAGCGCACGTAGGCTGTATGTCAAGTCAAGGGTGAAATCCCACGGCTCAACCGTGGAACTG
ASV35596	772	-0.896061	TRUE	TRUE	USA (Urban)	d__Bacteria	Desulfobacterota	Desulfovibrionales	Desulfovibrionaceae	uncultured	Human (USA/Malawi/Venezuela)	TACGGAGGGTGCGAGCGTTAATCGGAATTACTGGGCGTAAAGCGCACGTAGGCTGTATGTCAAGTCAAGGGTGAAATCCCACGGCTCAACCGTGGAACTG
ASV35598	845	1.86959	TRUE	TRUE	Venezuela (Rural)	d__Bacteria	Firmicutes	Oscillospirales	Ruminococcaceae	Subdoligranulum	Human (USA/Malawi/Venezuela)	AACGTAGGGTGCAAGCGTTGTCCGGAATTACTGGGTGTAAAGGGAGCGCAGGCGGGCATGCAAGTTGGAAGTGAAAACTATGGGCTCAACCCATAGCCTG
ASV35598	850	-1.31205	TRUE	TRUE	Malawi (Rural)	d__Bacteria	Firmicutes	Oscillospirales	Ruminococcaceae	Subdoligranulum	Human (USA/Malawi/Venezuela)	AACGTAGGGTGCAAGCGTTGTCCGGAATTACTGGGTGTAAAGGGAGCGCAGGCGGGCATGCAAGTTGGAAGTGAAAACTATGGGCTCAACCCATAGCCTG
ASV35638	498	0.255743	TRUE	FALSE	Venezuela (Rural)	d__Bacteria	Actinobacteriota	Coriobacteriales	Coriobacteriaceae	Collinsella	Human (USA/Malawi/Venezuela)	TACGTAGGGGGCGAGCGTTATCCGGATTCATTGGGCGTAAAGCGCGCGTAGGCGGCCCGGCAGGCCGGGGGTCGAAGCGGGGGGCTCAACCCCCGAAGCC
ASV35638	650	-0.192658	TRUE	TRUE	Malawi (Rural)	d__Bacteria	Actinobacteriota	Coriobacteriales	Coriobacteriaceae	Collinsella	Human (USA/Malawi/Venezuela)	TACGTAGGGGGCGAGCGTTATCCGGATTCATTGGGCGTAAAGCGCGCGTAGGCGGCCCGGCAGGCCGGGGGTCGAAGCGGGGGGCTCAACCCCCGAAGCC
ASV35648	494	-0.777338	TRUE	FALSE	Malawi (Rural)	d__Bacteria	Firmicutes	Lactobacillales	Lactobacillaceae	Lactobacillus	Human (USA/Malawi/Venezuela)	TACGTAGGTGGCAAGCGTTGTCCGGATTTATTGGGCGTAAAGCGAGCGCAGGCGGTTTCTTAAGTCTGATGTGAAAGCCTTCGGCTCAACCGAAGAAGTG
ASV35674	443	0.233464	TRUE	FALSE	USA (Urban)	d__Bacteria	Actinobacteriota	Corynebacteriales	Corynebacteriaceae	Corynebacterium	Human (USA/Malawi/Venezuela)	TACGTAGGGTGCAAGCGTTGTCCGGATTTACTGGGCGTAAAGAGCTCGTAGGTGGTGTGTCGCGTCGTCTGTGAAATTCCGGGGCTTAACTCCGGGCGTG
ASV35687	634	1.14248	TRUE	TRUE	USA (Urban)	d__Bacteria	Bacteroidota	Bacteroidales	Bacteroidaceae	Bacteroides	Human (USA/Malawi/Venezuela)	TACGGAGGATGCGAGCGTTATCCGGATTTATTGGGTTTAAAGGGAGCGCAGACGGGTCGTTAAGTCAGCTGTGAAAGTTTGGGGCTCAACCTTAAAATTG
ASV35720	433	0.811615	TRUE	FALSE	Venezuela (Rural)	d__Bacteria	Firmicutes	Oscillospirales	Oscillospirales	Hydrogenoanaerobacterium	Human (USA/Malawi/Venezuela)	TACGTAGGGTGCAAGCGTTGTCCGGAATTACTGGGTGTAAAGGGAGCGTAGGCGGGGAAGCAAGTTGGATGTGAAATGTACCGGCTCAACCGGTAAACTG
ASV35720	536	-0.819121	TRUE	FALSE	Malawi (Rural)	d__Bacteria	Firmicutes	Oscillospirales	Oscillospirales	Hydrogenoanaerobacterium	Human (USA/Malawi/Venezuela)	TACGTAGGGTGCAAGCGTTGTCCGGAATTACTGGGTGTAAAGGGAGCGTAGGCGGGGAAGCAAGTTGGATGTGAAATGTACCGGCTCAACCGGTAAACTG
ASV35730	504	-0.546834	TRUE	FALSE	Malawi (Rural)	d__Bacteria	Firmicutes	Oscillospirales	Ruminococcaceae	NA	Human (USA/Malawi/Venezuela)	TACGTAGGTGGCAAGCGTTGTCCGGAATTACTGGGTGTAAAGGGAGCGTAGGCGGGAAGACAAGTTGAATGTTTAAACTATCGGCTTAACCGGTAGTCGC
ASV35776	474	0.0382575	TRUE	FALSE	USA (Urban)	d__Bacteria	Firmicutes	Peptococcales	Peptococcaceae	uncultured	Human (USA/Malawi/Venezuela)	TACGTAGGGGGCGAGCGTTGTCCGGAATCACTGGGCGTAAAGGGCGCGTAGGCGGTCAGATAAGTCAGTGGTGAAAACTGGGGGCTCAACCTCCAGCCTG
ASV35796	428	-0.251274	TRUE	FALSE	USA (Urban)	d__Bacteria	Firmicutes	Lachnospirales	Lachnospiraceae	NA	Human (USA/Malawi/Venezuela)	TACGTAGGGGGCAAGCGTTATCCGGATTTACTGGGTGTAAAGGGAGCGTAGACGGCGAGACAAGTCTGAAGTGAAAGCCCGGGGCTCAACCCCGGGACTG
ASV35796	806	-0.446897	TRUE	TRUE	Malawi (Rural)	d__Bacteria	Firmicutes	Lachnospirales	Lachnospiraceae	NA	Human (USA/Malawi/Venezuela)	TACGTAGGGGGCAAGCGTTATCCGGATTTACTGGGTGTAAAGGGAGCGTAGACGGCGAGACAAGTCTGAAGTGAAAGCCCGGGGCTCAACCCCGGGACTG
ASV35840	822	-3.70041	TRUE	TRUE	USA (Urban)	d__Bacteria	Bacteroidota	Bacteroidales	Bacteroidaceae	Bacteroides	Human (USA/Malawi/Venezuela)	TACGGAGGATCCGAGCGTTATCCGGATTTATTGGGTTTAAAGGGAGCGTAGGTGGATTGTTAAGTCAGTTGTGAAAGTTTGCGGCTCAACCGTAAAATTG
ASV35840	840	3.92413	TRUE	TRUE	USA (Urban)	d__Bacteria	Bacteroidota	Bacteroidales	Bacteroidaceae	Bacteroides	Human (USA/Malawi/Venezuela)	TACGGAGGATCCGAGCGTTATCCGGATTTATTGGGTTTAAAGGGAGCGTAGGTGGATTGTTAAGTCAGTTGTGAAAGTTTGCGGCTCAACCGTAAAATTG
ASV35929	744	-1.65369	TRUE	TRUE	Malawi (Rural)	d__Bacteria	Actinobacteriota	Coriobacteriales	Atopobiaceae	Atopobium	Human (USA/Malawi/Venezuela)	TACGTAGGGGGCAAGCGTTATCCGGATTCATTGGGCGTAAAGCGCTCGTAGGCGGTCTGTTAGGTCGGGAGTTAAATCCGGGGGCTCAACCCCCGTTCGC
ASV35929	638	1.38865	TRUE	TRUE	Venezuela (Rural)	d__Bacteria	Actinobacteriota	Coriobacteriales	Atopobiaceae	Atopobium	Human (USA/Malawi/Venezuela)	TACGTAGGGGGCAAGCGTTATCCGGATTCATTGGGCGTAAAGCGCTCGTAGGCGGTCTGTTAGGTCGGGAGTTAAATCCGGGGGCTCAACCCCCGTTCGC
ASV36123	463	0.394437	TRUE	FALSE	USA (Urban)	d__Bacteria	Firmicutes	Peptostreptococcales-Tissierellales	Peptostreptococcales-Tissierellales	Anaerococcus	Human (USA/Malawi/Venezuela)	TACGTATGGACCGAGCGTTGTCCGGAATCATTGGGCGTAAAGGGTACGTAGGCGGCCTAGTAAGTTAGAAGTGAAATAATATAGCTCAACTATATAAAGC
ASV36253	832	-1.18775	TRUE	TRUE	USA (Urban)	d__Bacteria	Firmicutes	Erysipelotrichales	Erysipelatoclostridiaceae	Erysipelatoclostridium	Human (USA/Malawi/Venezuela)	TACGTAGGTGGCGAGCGTTATCCGGAATTATTGGGCGTAAAGAGGGAGCAGGCGGCGGCAGAGGTCTGTGGTGAAAGACTGAAGCTTAACTTCAGTAAGC
ASV36253	858	1.17034	TRUE	TRUE	USA (Urban)	d__Bacteria	Firmicutes	Erysipelotrichales	Erysipelatoclostridiaceae	Erysipelatoclostridium	Human (USA/Malawi/Venezuela)	TACGTAGGTGGCGAGCGTTATCCGGAATTATTGGGCGTAAAGAGGGAGCAGGCGGCGGCAGAGGTCTGTGGTGAAAGACTGAAGCTTAACTTCAGTAAGC
ASV36271	773	-0.14692	TRUE	TRUE	USA (Urban)	d__Bacteria	Firmicutes	Christensenellales	Christensenellaceae	Christensenellaceae_R-7_group	Human (USA/Malawi/Venezuela)	TACGTAGGGGGCAAGCGTTGTCCGGAATGATTGGGCGTAAAGGGCGCGTAGGCGGCCAACTAAGTCTGGAGTGAAAGTCCTGCTTTTAAGGTGGGAATTG
ASV36271	784	0.760033	TRUE	TRUE	USA (Urban)	d__Bacteria	Firmicutes	Christensenellales	Christensenellaceae	Christensenellaceae_R-7_group	Human (USA/Malawi/Venezuela)	TACGTAGGGGGCAAGCGTTGTCCGGAATGATTGGGCGTAAAGGGCGCGTAGGCGGCCAACTAAGTCTGGAGTGAAAGTCCTGCTTTTAAGGTGGGAATTG
ASV36278	787	1.18713	TRUE	TRUE	USA (Urban)	d__Bacteria	Firmicutes	Oscillospirales	Oscillospiraceae	NA	Human (USA/Malawi/Venezuela)	TACGTAGGTGGCAAGCGTTATCCGGATTTACTGGGTGTAAAGGGCGTGTAGGCGGGACTACAAGTCAGATGTGAAAACCAGAGGCTCAACCTCTGGCCTG
ASV36278	769	-0.575939	TRUE	TRUE	USA (Urban)	d__Bacteria	Firmicutes	Oscillospirales	Oscillospiraceae	NA	Human (USA/Malawi/Venezuela)	TACGTAGGTGGCAAGCGTTATCCGGATTTACTGGGTGTAAAGGGCGTGTAGGCGGGACTACAAGTCAGATGTGAAAACCAGAGGCTCAACCTCTGGCCTG
ASV36287	867	-1.85018	TRUE	TRUE	Malawi (Rural)	d__Bacteria	Firmicutes	Erysipelotrichales	Erysipelotrichaceae	Solobacterium	Human (USA/Malawi/Venezuela)	TACGTAGGTAGCGAGCGTTATCCGGAATTATTGGGCGTAAAGGGTGCGTAGGCGGCCTGTTAAGTTTATGGTGAAAGCGTGGGGCTCAACCCCATAAAGC
ASV36453	855	-1.18437	TRUE	TRUE	Malawi (Rural)	d__Bacteria	Proteobacteria	Aeromonadales	Succinivibrionaceae	Ruminobacter	Human (USA/Malawi/Venezuela)	TACGGAGGGTGCAAGCGTTAATCGGAATAACTGGGCGTAAAGCGCACGTAGGTGGTTCGACAAGTCAGATGTGAAAGCCCCGGGCTTAACCTGGGATGTG
ASV36555	630	-0.176383	TRUE	TRUE	Malawi (Rural)	d__Bacteria	Firmicutes	Peptostreptococcales-Tissierellales	Peptostreptococcaceae	Intestinibacter	Human (USA/Malawi/Venezuela)	TACGTAGGGGGCTAGCGTTATCCGGATTTACTGGGCGTAAAGGGTGCGTAGGCGGTCTTTTAAGTCAGGAGTGAAAGGCTACGGCTCAACCGTAGTAAGC
ASV36555	766	-1.79268	TRUE	TRUE	USA (Urban)	d__Bacteria	Firmicutes	Peptostreptococcales-Tissierellales	Peptostreptococcaceae	Intestinibacter	Human (USA/Malawi/Venezuela)	TACGTAGGGGGCTAGCGTTATCCGGATTTACTGGGCGTAAAGGGTGCGTAGGCGGTCTTTTAAGTCAGGAGTGAAAGGCTACGGCTCAACCGTAGTAAGC
ASV36582	800	-0.747429	TRUE	TRUE	Malawi (Rural)	d__Bacteria	Firmicutes	Oscillospirales	[Eubacterium]_coprostanoligenes_group	[Eubacterium]_coprostanoligenes_group	Human (USA/Malawi/Venezuela)	TACGTAGGTGGCAAGCGTTGTCCGGAATTACTGGGTGTAAAGGGAGCGCAGGCGGGGGAGCAAGTCAGCTGTGAAATCTATGGGCTTAACCCATAAACTG
ASV36625	529	-0.613702	TRUE	FALSE	Malawi (Rural)	d__Bacteria	Firmicutes	Lachnospirales	Lachnospiraceae	NA	Human (USA/Malawi/Venezuela)	TACGTAGGGGGCAAGCGTTATCCGGATTTACTGGGTGTAAAGGGAGCGTAGACGGAATGGCAAGTCTGATGTGAAAGTTTGCGGCTCAACCGTAAAATTG
ASV36625	434	0.505907	TRUE	FALSE	Venezuela (Rural)	d__Bacteria	Firmicutes	Lachnospirales	Lachnospiraceae	NA	Human (USA/Malawi/Venezuela)	TACGTAGGGGGCAAGCGTTATCCGGATTTACTGGGTGTAAAGGGAGCGTAGACGGAATGGCAAGTCTGATGTGAAAGTTTGCGGCTCAACCGTAAAATTG
ASV36737	831	-1.20642	TRUE	TRUE	Malawi (Rural)	d__Bacteria	Firmicutes	Oscillospirales	Ruminococcaceae	Ruminococcus	Human (USA/Malawi/Venezuela)	TACGTAGGGAGCGAGCGTTGTCCGGAATGACTGGGTGTAAAGGGAGCGTAGGCGGGATGGCAAGTCAGATGTGAAACCTGAGGGCTCAACCTTCAGACTG
ASV36737	763	0.909365	TRUE	TRUE	Venezuela (Rural)	d__Bacteria	Firmicutes	Oscillospirales	Ruminococcaceae	Ruminococcus	Human (USA/Malawi/Venezuela)	TACGTAGGGAGCGAGCGTTGTCCGGAATGACTGGGTGTAAAGGGAGCGTAGGCGGGATGGCAAGTCAGATGTGAAACCTGAGGGCTCAACCTTCAGACTG
ASV36757	747	0.115457	TRUE	TRUE	USA (Urban)	d__Bacteria	Firmicutes	Clostridia_UCG-014	Clostridia_UCG-014	Clostridia_UCG-014	Human (USA/Malawi/Venezuela)	TACGTAGGGTCCAAGCGTTATCCGGATTTACTGGGTGTAAAGGGCGAGTAGACGGCGCTGTAAGTCAGCTGTGAAAACTTAGGGCTCAACCTTAAGCCTG
ASV36757	732	0.161428	TRUE	TRUE	Venezuela (Rural)	d__Bacteria	Firmicutes	Clostridia_UCG-014	Clostridia_UCG-014	Clostridia_UCG-014	Human (USA/Malawi/Venezuela)	TACGTAGGGTCCAAGCGTTATCCGGATTTACTGGGTGTAAAGGGCGAGTAGACGGCGCTGTAAGTCAGCTGTGAAAACTTAGGGCTCAACCTTAAGCCTG
ASV36798	521	-0.204318	TRUE	FALSE	Malawi (Rural)	d__Bacteria	Firmicutes	Peptostreptococcales-Tissierellales	Peptostreptococcales-Tissierellales	Murdochiella	Human (USA/Malawi/Venezuela)	TACGTAGGGGGCGAGCGTTGTTCGGAATTATTGGGCGTAAAGGGTACGTAGGCGGCTCGTTAAGTTTGGCGTTAAATTCCGGGGCTCAACCCCGGCAAGC
ASV36851	784	0.867539	TRUE	TRUE	USA (Urban)	d__Bacteria	Firmicutes	RF39	RF39	RF39	Human (USA/Malawi/Venezuela)	TACGTAGGGGGCGAGCGTTATCCGGATTTATTGGGCGTAAAGCGTGTGTAGGCGGCTTGTTAAGTTTAAGATAAAAGCCTGGGGCTTAACCCCAGTTCGT
ASV36902	440	-0.253363	TRUE	FALSE	USA (Urban)	d__Bacteria	Firmicutes	Lachnospirales	Lachnospiraceae	NA	Human (USA/Malawi/Venezuela)	TACGTAGGGGGCAAGCGTTATCCGGATTTACTGGGTGTAAAGGGAGCGCAGGCGGTGCGGCAAGTCTGATGTGAAAGCCCGGGGCTCAACCCCGGGACTG
ASV36902	726	0.123473	TRUE	TRUE	USA (Urban)	d__Bacteria	Firmicutes	Lachnospirales	Lachnospiraceae	NA	Human (USA/Malawi/Venezuela)	TACGTAGGGGGCAAGCGTTATCCGGATTTACTGGGTGTAAAGGGAGCGCAGGCGGTGCGGCAAGTCTGATGTGAAAGCCCGGGGCTCAACCCCGGGACTG
ASV36928	862	1.97615	TRUE	TRUE	USA (Urban)	d__Bacteria	Firmicutes	Oscillospirales	Butyricicoccaceae	Butyricicoccus	Human (USA/Malawi/Venezuela)	TACGTAGGGAGCAAGCGTTATCCGGATTTACTGGGTGTAAAGGGCGCGCAGGCGGGCCGGTAAGTTGGAAGTGAAATCTATGGGCTTAACCCATAAACTG
ASV36940	812	-1.04292	TRUE	TRUE	Malawi (Rural)	d__Bacteria	Firmicutes	Oscillospirales	Ethanoligenenaceae	Acetanaerobacterium	Human (USA/Malawi/Venezuela)	TACGTAGGGAGCAAGCGTTGTCCGGAATTACTGGGTGTAAAGGGAGCGTAGGCGGGTGCTCAAGTTGAATGTGAAATGCAGAGGCTCAACCTCTGAATTG
ASV36940	777	0.737765	TRUE	TRUE	Venezuela (Rural)	d__Bacteria	Firmicutes	Oscillospirales	Ethanoligenenaceae	Acetanaerobacterium	Human (USA/Malawi/Venezuela)	TACGTAGGGAGCAAGCGTTGTCCGGAATTACTGGGTGTAAAGGGAGCGTAGGCGGGTGCTCAAGTTGAATGTGAAATGCAGAGGCTCAACCTCTGAATTG
ASV36957	453	0.357575	TRUE	FALSE	Venezuela (Rural)	d__Bacteria	Verrucomicrobiota	Verrucomicrobiales	Akkermansiaceae	Akkermansia	Human (USA/Malawi/Venezuela)	TACAGAGGTCTCAAGCGTTGTTCGGAATCACTGGGCGTAAAGCGTGCGTAGGCTGTTTCGTAAGTCGTGTGTGAAAGGCGCGGGCTCAATCCGCGGACGG
ASV36957	548	-0.514764	TRUE	FALSE	Malawi (Rural)	d__Bacteria	Verrucomicrobiota	Verrucomicrobiales	Akkermansiaceae	Akkermansia	Human (USA/Malawi/Venezuela)	TACAGAGGTCTCAAGCGTTGTTCGGAATCACTGGGCGTAAAGCGTGCGTAGGCTGTTTCGTAAGTCGTGTGTGAAAGGCGCGGGCTCAATCCGCGGACGG
ASV3701	784	-1.59558	TRUE	TRUE	USA (Urban)	d__Archaea	Euryarchaeota	Methanobacteriales	Methanobacteriaceae	Methanobrevibacter	Human (USA/Malawi/Venezuela)	CACCGGCAGCTCTAGTGGTAGCAGTTTTTTTTGGGCCTAAAGCGTCCGTAGCCGGTTTAATAAGTCTCTGGTGAAATCCTGCAGCTTAACTGTGGGAATT
ASV3712	486	0.0469505	TRUE	FALSE	USA (Urban)	d__Bacteria	Firmicutes	Oscillospirales	Ruminococcaceae	Negativibacillus	Human (USA/Malawi/Venezuela)	TACGTAGGTGGCAAGCGTTGTCCGGAATTACTGGGTGTAAAGGGAGCGTAGGCGGGGAGACAAGTTGAATGTCTAAACTATCGGCTTAACTGATAGTCGC
ASV37144	762	0.470141	TRUE	TRUE	Venezuela (Rural)	d__Bacteria	Firmicutes	Oscillospirales	[Eubacterium]_coprostanoligenes_group	[Eubacterium]_coprostanoligenes_group	Human (USA/Malawi/Venezuela)	TACGTAGGTGGCAAGCGTTGTCCGGAATTACTGGGTGTAAAGGGTGCGCAGGCGGGATTGCAAGTTGGATGTGAAATACCGGGGCTTAACCCCGGAGCTG
ASV37144	771	-0.0767192	TRUE	TRUE	Malawi (Rural)	d__Bacteria	Firmicutes	Oscillospirales	[Eubacterium]_coprostanoligenes_group	[Eubacterium]_coprostanoligenes_group	Human (USA/Malawi/Venezuela)	TACGTAGGTGGCAAGCGTTGTCCGGAATTACTGGGTGTAAAGGGTGCGCAGGCGGGATTGCAAGTTGGATGTGAAATACCGGGGCTTAACCCCGGAGCTG
ASV37149	509	-0.189112	TRUE	FALSE	Malawi (Rural)	d__Bacteria	Firmicutes	Peptococcales	Peptococcaceae	uncultured	Human (USA/Malawi/Venezuela)	TACGTAGGGGGCGAGCGTTGTCCGGAATCACTGGGCGTAAAGGGCGCGTAGGCGGTTTAATAAGTCAGTGGTGAAAACTGAGGGCTCAACCCTCAGCCTG
ASV37154	807	-0.0782533	TRUE	TRUE	USA (Urban)	d__Bacteria	Firmicutes	Clostridia_vadinBB60_group	Clostridia_vadinBB60_group	Clostridia_vadinBB60_group	Human (USA/Malawi/Venezuela)	TACGTAGGTAGCAAGCGTTGTCCGGAATGACTGGGCGTAAAGGGTGCGTAGGTGGTTTAACAAGTTGGTAGTGAAATTCCGAAGCTTAACTTCGGCGCTA
ASV37154	807	0.487937	TRUE	TRUE	USA (Urban)	d__Bacteria	Firmicutes	Clostridia_vadinBB60_group	Clostridia_vadinBB60_group	Clostridia_vadinBB60_group	Human (USA/Malawi/Venezuela)	TACGTAGGTAGCAAGCGTTGTCCGGAATGACTGGGCGTAAAGGGTGCGTAGGTGGTTTAACAAGTTGGTAGTGAAATTCCGAAGCTTAACTTCGGCGCTA
ASV37178	465	0.675921	TRUE	FALSE	Venezuela (Rural)	d__Bacteria	Firmicutes	Oscillospirales	Ruminococcaceae	Harryflintia	Human (USA/Malawi/Venezuela)	TACGTAGGTGGCAAGCGTTGTCCGGAATTACTGGGTGTAAAGGGAGCGTAGGCGGGAATGCAAGTTGAATGTTTAAACTATCGGCTCAACTGATAATCGC
ASV37178	607	-0.850081	TRUE	FALSE	Malawi (Rural)	d__Bacteria	Firmicutes	Oscillospirales	Ruminococcaceae	Harryflintia	Human (USA/Malawi/Venezuela)	TACGTAGGTGGCAAGCGTTGTCCGGAATTACTGGGTGTAAAGGGAGCGTAGGCGGGAATGCAAGTTGAATGTTTAAACTATCGGCTCAACTGATAATCGC
ASV37230	496	-0.156219	TRUE	FALSE	Malawi (Rural)	d__Bacteria	Firmicutes	Peptostreptococcales-Tissierellales	Anaerovoracaceae	[Eubacterium]_nodatum_group	Human (USA/Malawi/Venezuela)	TACGTAGGGGGCGAGCGTTATCCGGAATTATTGGGCGTAAAGAGTGCGTAGGTGGTTACCTAAGCGCAGGGTCTAAGGCAATGGCTCAACCATTGTTCGC
ASV37295	709	-0.217961	TRUE	TRUE	USA (Urban)	d__Bacteria	Firmicutes	Oscillospirales	Ruminococcaceae	Incertae_Sedis	Human (USA/Malawi/Venezuela)	TACGTAGGGAGCGAGCGTTGTCCGGATTTACTGGGTGTAAAGGGTGCGTAGGCGGCAGAGCAAGTCAGGCGTGAAAGCCATGGGCTTAACCCATGAACTG
ASV37295	767	0.203862	TRUE	TRUE	USA (Urban)	d__Bacteria	Firmicutes	Oscillospirales	Ruminococcaceae	Incertae_Sedis	Human (USA/Malawi/Venezuela)	TACGTAGGGAGCGAGCGTTGTCCGGATTTACTGGGTGTAAAGGGTGCGTAGGCGGCAGAGCAAGTCAGGCGTGAAAGCCATGGGCTTAACCCATGAACTG
ASV37344	786	0.50727	TRUE	TRUE	USA (Urban)	d__Bacteria	Firmicutes	Lachnospirales	Lachnospiraceae	NA	Human (USA/Malawi/Venezuela)	TACGTAGGGGGCAAGCGTTATCCGGAATTACTGGGTGTAAAGGGAGCGTAGGCGGCATGGTAAGCCAGATGTGAAAGCCCGAAGCTTAACTTCGAGGATT
ASV37344	776	-0.512427	TRUE	TRUE	USA (Urban)	d__Bacteria	Firmicutes	Lachnospirales	Lachnospiraceae	NA	Human (USA/Malawi/Venezuela)	TACGTAGGGGGCAAGCGTTATCCGGAATTACTGGGTGTAAAGGGAGCGTAGGCGGCATGGTAAGCCAGATGTGAAAGCCCGAAGCTTAACTTCGAGGATT
ASV37390	786	0.081609	TRUE	TRUE	Venezuela (Rural)	d__Bacteria	Actinobacteriota	Coriobacteriales	Eggerthellaceae	uncultured	Human (USA/Malawi/Venezuela)	TACGTAGGGAGCGAGCGTTATCCGGATTCATTGGGCGTAAAGCGCGCGTAGGCGGCCCGTCAAGCGGGGTTTCAAATCCAGGGGCTCAACCTCTGGCCGG
ASV37390	797	-0.051048	TRUE	TRUE	Malawi (Rural)	d__Bacteria	Actinobacteriota	Coriobacteriales	Eggerthellaceae	uncultured	Human (USA/Malawi/Venezuela)	TACGTAGGGAGCGAGCGTTATCCGGATTCATTGGGCGTAAAGCGCGCGTAGGCGGCCCGTCAAGCGGGGTTTCAAATCCAGGGGCTCAACCTCTGGCCGG
ASV37481	519	-0.423572	TRUE	FALSE	Malawi (Rural)	d__Bacteria	Firmicutes	Lachnospirales	Lachnospiraceae	Lachnospiraceae_UCG-010	Human (USA/Malawi/Venezuela)	TACGTAGGGGGCAAGCGTTATCCGGAATTACTGGGTGTAAAGGGAGAGTAGGCGGCGAAGTAAGTAAGATGTGAAAGCCCTCGGCTTAACTGGGGGATTG
ASV37481	427	0.335321	TRUE	FALSE	Venezuela (Rural)	d__Bacteria	Firmicutes	Lachnospirales	Lachnospiraceae	Lachnospiraceae_UCG-010	Human (USA/Malawi/Venezuela)	TACGTAGGGGGCAAGCGTTATCCGGAATTACTGGGTGTAAAGGGAGAGTAGGCGGCGAAGTAAGTAAGATGTGAAAGCCCTCGGCTTAACTGGGGGATTG
ASV3749	830	-4.32181	TRUE	TRUE	USA (Urban)	d__Bacteria	Bacteroidota	Bacteroidales	Rikenellaceae	Alistipes	Human (USA/Malawi/Venezuela)	TACGGAGGATTCAAGCGTTATCCGGATTTATTGGGTTTAAAGGGTGCGTAGGCGGTTTGATAAGTTAGAGGTGAAATTTCGGGGCTCAACCCTGAACGTG
ASV3749	865	4.86531	TRUE	TRUE	USA (Urban)	d__Bacteria	Bacteroidota	Bacteroidales	Rikenellaceae	Alistipes	Human (USA/Malawi/Venezuela)	TACGGAGGATTCAAGCGTTATCCGGATTTATTGGGTTTAAAGGGTGCGTAGGCGGTTTGATAAGTTAGAGGTGAAATTTCGGGGCTCAACCCTGAACGTG
ASV37505	506	-0.0881347	TRUE	FALSE	Malawi (Rural)	d__Bacteria	Firmicutes	Oscillospirales	Oscillospiraceae	NA	Human (USA/Malawi/Venezuela)	TACGTAGGGAGCAAGCGTTATCCGGATTTACTGGGTGTAAAGGGCGTGTAGGCGGGACTGCAAGTCAGATGTGAAAACTCGGGGCTCAACCCCGAGCCTG
ASV37521	795	-0.107274	TRUE	TRUE	Malawi (Rural)	d__Bacteria	Bacteroidota	Bacteroidales	Tannerellaceae	Parabacteroides	Human (USA/Malawi/Venezuela)	TACGGAGGATGCGAGCGTTATCCGGATTTATTGGGTTTAAAGGGTGCGTAGGTTGTTTTTTAAGTCAGCGGTGAAAGTTTGTGGCTTAACCATAAAATTG
ASV37535	503	-0.0129819	TRUE	FALSE	USA (Urban)	d__Bacteria	Firmicutes	Erysipelotrichales	Erysipelatoclostridiaceae	Candidatus_Stoquefichus	Human (USA/Malawi/Venezuela)	TACGTAGGTGGCGAGCGTTATCCGGAATCATTGGGCGTAAAGAGGGAGCAGGCGGCAACTAGGGTCTGCGGTAAAAGACCGAAGCTAAACTTCGGTAAGC
ASV37535	586	0.00620934	TRUE	FALSE	USA (Urban)	d__Bacteria	Firmicutes	Erysipelotrichales	Erysipelatoclostridiaceae	Candidatus_Stoquefichus	Human (USA/Malawi/Venezuela)	TACGTAGGTGGCGAGCGTTATCCGGAATCATTGGGCGTAAAGAGGGAGCAGGCGGCAACTAGGGTCTGCGGTAAAAGACCGAAGCTAAACTTCGGTAAGC
ASV37640	779	-3.03188	TRUE	TRUE	Malawi (Rural)	d__Bacteria	Firmicutes	Clostridiales	Clostridiaceae	Clostridium_sensu_stricto_1	Human (USA/Malawi/Venezuela)	TACGTAGGTGGCGAGCGTTGTCCGGATTTACTGGGCGTAAAGGGAGCGTAGGCGGATTTTTAAGTGAGATGTGAAATACTCGGGCTTAACCTGAGTGCTG
ASV37640	687	1.02299	TRUE	TRUE	Venezuela (Rural)	d__Bacteria	Firmicutes	Clostridiales	Clostridiaceae	Clostridium_sensu_stricto_1	Human (USA/Malawi/Venezuela)	TACGTAGGTGGCGAGCGTTGTCCGGATTTACTGGGCGTAAAGGGAGCGTAGGCGGATTTTTAAGTGAGATGTGAAATACTCGGGCTTAACCTGAGTGCTG
ASV37650	788	-0.764684	TRUE	TRUE	USA (Urban)	d__Bacteria	Firmicutes	Lachnospirales	Lachnospiraceae	Lachnospiraceae_FCS020_group	Human (USA/Malawi/Venezuela)	TACGTAGGGGGCAAGCGTTATCCGGATTTACTGGGTGTAAAGGGAGCGTAGGCGGTTTGGCAAGTCAGAAGTGAAAGCCCAAGGCTTAACCATGGGACTG
ASV37650	814	0.208509	TRUE	TRUE	USA (Urban)	d__Bacteria	Firmicutes	Lachnospirales	Lachnospiraceae	Lachnospiraceae_FCS020_group	Human (USA/Malawi/Venezuela)	TACGTAGGGGGCAAGCGTTATCCGGATTTACTGGGTGTAAAGGGAGCGTAGGCGGTTTGGCAAGTCAGAAGTGAAAGCCCAAGGCTTAACCATGGGACTG
ASV37686	585	-0.479707	TRUE	FALSE	Malawi (Rural)	d__Bacteria	Firmicutes	Clostridiales	Clostridiaceae	Clostridium_sensu_stricto_1	Human (USA/Malawi/Venezuela)	TACGTAGGTGGCAAGCGTTGTCCGGATTTACTGGGCGTAAAGGGAGCGTAGGCGGATTTTTAAGTGGGATGTGAAATACCCGGGCTCAACCTGGGTGCTG
ASV37717	781	0.149685	TRUE	TRUE	USA (Urban)	d__Bacteria	Firmicutes	Lactobacillales	Lactobacillaceae	Lactobacillus	Human (USA/Malawi/Venezuela)	TACGTAGGTGGCGAGCGTTGTCCGGATTTATTGGGCGTAAAGGGAACGCAGGCGGTCTTTTAAGTCTGATGTGAAAGCCTTCGGCTTAACCGAAGTAGTG
ASV37717	755	-0.304627	TRUE	TRUE	USA (Urban)	d__Bacteria	Firmicutes	Lactobacillales	Lactobacillaceae	Lactobacillus	Human (USA/Malawi/Venezuela)	TACGTAGGTGGCGAGCGTTGTCCGGATTTATTGGGCGTAAAGGGAACGCAGGCGGTCTTTTAAGTCTGATGTGAAAGCCTTCGGCTTAACCGAAGTAGTG
ASV37738	787	0.76322	TRUE	TRUE	USA (Urban)	d__Bacteria	Firmicutes	Oscillospirales	Ruminococcaceae	Incertae_Sedis	Human (USA/Malawi/Venezuela)	TACGTAGGGAGCGAGCGTTGTCCGGATTTACTGGGTGTAAAGGGTGCGTAGGCGGGCCCGCAAGTCAGACGTGAAAGCCACAGGCTCAACCTGTGAATTG
ASV37860	758	-0.566957	TRUE	TRUE	USA (Urban)	d__Bacteria	Firmicutes	Lactobacillales	Streptococcaceae	Streptococcus	Human (USA/Malawi/Venezuela)	TACGTAGGTCCCGAGCGTTGTCCGGATTTATTGGGCGTAAAGCGAGCGCAGGCGGTTTAATAAGTCTGAAGTTAAAGGCAGTGGCTTAACCATTGTTCGC
ASV37860	825	-1.10841	TRUE	TRUE	Malawi (Rural)	d__Bacteria	Firmicutes	Lactobacillales	Streptococcaceae	Streptococcus	Human (USA/Malawi/Venezuela)	TACGTAGGTCCCGAGCGTTGTCCGGATTTATTGGGCGTAAAGCGAGCGCAGGCGGTTTAATAAGTCTGAAGTTAAAGGCAGTGGCTTAACCATTGTTCGC
ASV37914	863	1.51432	TRUE	TRUE	USA (Urban)	d__Bacteria	Firmicutes	Lachnospirales	Lachnospiraceae	Oribacterium	Human (USA/Malawi/Venezuela)	TACGTAGGGGGCAAGCGTTATCCGGATTTACTGGGTGTAAAGGGAGCGTAGACGGCACAGCAAGTCTGAAGTGAAATCCCCGGGCTCAACCCGGGAACTG
ASV37914	836	-1.50037	TRUE	TRUE	USA (Urban)	d__Bacteria	Firmicutes	Lachnospirales	Lachnospiraceae	Oribacterium	Human (USA/Malawi/Venezuela)	TACGTAGGGGGCAAGCGTTATCCGGATTTACTGGGTGTAAAGGGAGCGTAGACGGCACAGCAAGTCTGAAGTGAAATCCCCGGGCTCAACCCGGGAACTG
ASV37916	848	-1.63725	TRUE	TRUE	Malawi (Rural)	d__Bacteria	Firmicutes	Oscillospirales	Butyricicoccaceae	Butyricicoccus	Human (USA/Malawi/Venezuela)	TACGTAGGGAGCAAGCGTTATCCGGATTTACTGGGTGTAAAGGGCGCGCAGGCGGGCCGGCAAGTTGGAAGTGAAATCCGGGGGCTTAACCCCCGAACTG
ASV37916	754	0.562022	TRUE	TRUE	Venezuela (Rural)	d__Bacteria	Firmicutes	Oscillospirales	Butyricicoccaceae	Butyricicoccus	Human (USA/Malawi/Venezuela)	TACGTAGGGAGCAAGCGTTATCCGGATTTACTGGGTGTAAAGGGCGCGCAGGCGGGCCGGCAAGTTGGAAGTGAAATCCGGGGGCTTAACCCCCGAACTG
ASV37919	521	-0.912918	TRUE	FALSE	Malawi (Rural)	d__Bacteria	Verrucomicrobiota	Verrucomicrobiales	Akkermansiaceae	Akkermansia	Human (USA/Malawi/Venezuela)	TACAGAGGTCTCAAGCGTTGTTCGGAATCACTGGGCGTAAAGCGTGCGTAGGCTGTTTCGTAAGTCGTGTGTGAAAGGCGCGGGCTCAACCCACGGACGG
ASV38093	761	1.9474	TRUE	TRUE	Venezuela (Rural)	d__Bacteria	Firmicutes	Oscillospirales	[Eubacterium]_coprostanoligenes_group	[Eubacterium]_coprostanoligenes_group	Human (USA/Malawi/Venezuela)	TACGTAGGATGCAAGCGTTATCCGGATTTACTGGGTGTAAAGGGAGCGCAGGCGGGACTGCAAGTTGGATGTGAAATACCGTGGCTTAACCACGGAACTG
ASV38093	711	-0.503493	TRUE	TRUE	Malawi (Rural)	d__Bacteria	Firmicutes	Oscillospirales	[Eubacterium]_coprostanoligenes_group	[Eubacterium]_coprostanoligenes_group	Human (USA/Malawi/Venezuela)	TACGTAGGATGCAAGCGTTATCCGGATTTACTGGGTGTAAAGGGAGCGCAGGCGGGACTGCAAGTTGGATGTGAAATACCGTGGCTTAACCACGGAACTG
ASV38116	459	0.307437	TRUE	FALSE	Venezuela (Rural)	d__Bacteria	Firmicutes	Lachnospirales	Lachnospiraceae	Lachnospiraceae_ND3007_group	Human (USA/Malawi/Venezuela)	TACGTAGGTGGCAAGGCAAGCCAGAAGTGAAAACCCGGGGCTCAACCGCGGGATTGCTTTTGGAACTGTCATGCTAGAGTGCAGGAGGGGTGAGCGGAAT
ASV38116	760	0.437558	TRUE	TRUE	USA (Urban)	d__Bacteria	Firmicutes	Lachnospirales	Lachnospiraceae	Lachnospiraceae_ND3007_group	Human (USA/Malawi/Venezuela)	TACGTAGGTGGCAAGGCAAGCCAGAAGTGAAAACCCGGGGCTCAACCGCGGGATTGCTTTTGGAACTGTCATGCTAGAGTGCAGGAGGGGTGAGCGGAAT
ASV38174	487	-0.275302	TRUE	FALSE	Malawi (Rural)	d__Bacteria	Firmicutes	Christensenellales	Christensenellaceae	Christensenellaceae_R-7_group	Human (USA/Malawi/Venezuela)	TACGTAGGGGGCGAGCGTTGTCCGGAATGACTGGGCGTAAAGGGCGCGTAGGCGGCCGATTAAGTCTGGAGTGAAATCCCCGCTTTTAAGGTGGGAATTG
ASV38186	493	-0.072912	TRUE	FALSE	Malawi (Rural)	d__Bacteria	Firmicutes	Oscillospirales	UCG-010	UCG-010	Human (USA/Malawi/Venezuela)	TACGTAGGTGGCGAGCGTTATCCGGAATTACTGGGTGTAAAGGGTGTGTAGGCGGGGCTGCAAGTCAGGCGTGAAAATTATGGGCTCAACCCATAAACTG
ASV38203	512	-0.474729	TRUE	FALSE	Malawi (Rural)	d__Bacteria	Firmicutes	Oscillospirales	Ruminococcaceae	uncultured	Human (USA/Malawi/Venezuela)	TACGTAGGGAGCAAGCGTTGTCCGGAATTACTGGGTGTAAAGGGAGCGTAGGCGGGACCGCAAGTTGGATGTGAAATCTACCGGCTCAACTGGTAGCTGC
ASV38221	818	-1.07175	TRUE	TRUE	Malawi (Rural)	d__Bacteria	Firmicutes	Peptostreptococcales-Tissierellales	Peptostreptococcaceae	Terrisporobacter	Human (USA/Malawi/Venezuela)	TACGTAGGGGGCTAGCGTTATCCGGATTTACTGGGCGTAAAGGGTGCGTAGGTGGTTTCTTAAGTCAGGAGTGAAAGGCTACGGCTCAACCGTAGTAAGC
ASV3827	781	-0.517854	TRUE	TRUE	Malawi (Rural)	d__Bacteria	Firmicutes	Oscillospirales	Oscillospiraceae	Colidextribacter	Human (USA/Malawi/Venezuela)	TACGTAGGTGGCAAGCGTTATCCGGATTTACTGGGTGTAAAGGGCGTGTAGGCGGGAAAGCAAGTCAGATGTGAAAACTGTGGGCTCAACCCACAGCCTG
ASV3827	733	0.395747	TRUE	TRUE	Venezuela (Rural)	d__Bacteria	Firmicutes	Oscillospirales	Oscillospiraceae	Colidextribacter	Human (USA/Malawi/Venezuela)	TACGTAGGTGGCAAGCGTTATCCGGATTTACTGGGTGTAAAGGGCGTGTAGGCGGGAAAGCAAGTCAGATGTGAAAACTGTGGGCTCAACCCACAGCCTG
ASV38336	568	0.38889	TRUE	FALSE	USA (Urban)	d__Bacteria	Desulfobacterota	Desulfovibrionales	Desulfovibrionaceae	Bilophila	Human (USA/Malawi/Venezuela)	TACGGAGGGTGCAAGCGTTAATCGGAATCACTGGGCGTAAAGCGCACGTAGGCGGCCTGGTAAGTCAGGGGTGAAATCCCACAGCCCAACTGTGGAACTG
ASV38336	467	-0.217394	TRUE	FALSE	USA (Urban)	d__Bacteria	Desulfobacterota	Desulfovibrionales	Desulfovibrionaceae	Bilophila	Human (USA/Malawi/Venezuela)	TACGGAGGGTGCAAGCGTTAATCGGAATCACTGGGCGTAAAGCGCACGTAGGCGGCCTGGTAAGTCAGGGGTGAAATCCCACAGCCCAACTGTGGAACTG
ASV38435	712	0.27352	TRUE	TRUE	USA (Urban)	d__Bacteria	Firmicutes	Lachnospirales	Lachnospiraceae	NA	Human (USA/Malawi/Venezuela)	TACGTAGGGGGCAAGCGTTATCCGGATTTACTGGGTGTAAAGGGAGCGTAGACGGCTAAGCAAGTCAGAAGTGAAAGGCTGGGGCTCAACCCCGGGACTG
ASV38476	841	1.66851	TRUE	TRUE	Venezuela (Rural)	d__Bacteria	Firmicutes	Oscillospirales	[Eubacterium]_coprostanoligenes_group	[Eubacterium]_coprostanoligenes_group	Human (USA/Malawi/Venezuela)	TACGTAGGTGGCAAGCGTTGTCCGGAATTACTGGGTGTAAAGGGAGCGCAGGCGGGAAATCAAGTTGGATGTGAAATGTCGGGGCTTAACCCCGGAACTG
ASV38476	825	-0.418652	TRUE	TRUE	Malawi (Rural)	d__Bacteria	Firmicutes	Oscillospirales	[Eubacterium]_coprostanoligenes_group	[Eubacterium]_coprostanoligenes_group	Human (USA/Malawi/Venezuela)	TACGTAGGTGGCAAGCGTTGTCCGGAATTACTGGGTGTAAAGGGAGCGCAGGCGGGAAATCAAGTTGGATGTGAAATGTCGGGGCTTAACCCCGGAACTG
ASV38515	545	-0.463669	TRUE	FALSE	Malawi (Rural)	d__Bacteria	Proteobacteria	Pseudomonadales	Moraxellaceae	Acinetobacter	Human (USA/Malawi/Venezuela)	TACAGAGGGTGCGAGCGTTAATCGGATTTACTGGGCGTAAAGCGTGCGTAGGCGGCTTTTTAAGTCGGATGTGAAATCCCCGAGCTTAACTTGGGAATTG
ASV38515	472	0.553395	TRUE	FALSE	Venezuela (Rural)	d__Bacteria	Proteobacteria	Pseudomonadales	Moraxellaceae	Acinetobacter	Human (USA/Malawi/Venezuela)	TACAGAGGGTGCGAGCGTTAATCGGATTTACTGGGCGTAAAGCGTGCGTAGGCGGCTTTTTAAGTCGGATGTGAAATCCCCGAGCTTAACTTGGGAATTG
ASV38552	626	-0.236943	TRUE	TRUE	USA (Urban)	d__Bacteria	Actinobacteriota	Micrococcales	Micrococcaceae	Rothia	Human (USA/Malawi/Venezuela)	TACGTAGGGCGCGAGCGTTGTCCGGAATTATTGGGCGTAAAGAGCTTGTAGGCGGTTTGTCGCGTCTGCTGTGAAAGGCCGGGGCTTAACTCCGTGTATT
ASV38552	521	-0.36774	TRUE	FALSE	Malawi (Rural)	d__Bacteria	Actinobacteriota	Micrococcales	Micrococcaceae	Rothia	Human (USA/Malawi/Venezuela)	TACGTAGGGCGCGAGCGTTGTCCGGAATTATTGGGCGTAAAGAGCTTGTAGGCGGTTTGTCGCGTCTGCTGTGAAAGGCCGGGGCTTAACTCCGTGTATT
ASV38632	775	-0.916953	TRUE	TRUE	USA (Urban)	d__Bacteria	Firmicutes	Oscillospirales	Ruminococcaceae	uncultured	Human (USA/Malawi/Venezuela)	TACGTAGGTGGCAAGCGTTGTCCGGAATTACTGGGTGTAAAGGGAGCGTAGGCGGGCAGGCAAGTCAGGCGTGAAATATATCGGCTCAACCGGGATCTGC
ASV38696	828	0.610309	TRUE	TRUE	Venezuela (Rural)	d__Bacteria	Bacteroidota	Bacteroidales	Prevotellaceae	uncultured	Human (USA/Malawi/Venezuela)	TACGGAAGGTCCGGGCGTTATCCGGATTTATTGGGTTTAAAGGGAGCGTAGGCCGTCTTTTAAGCGTGTTGTGAAATACTGTCGCTCAACGACAGAGGTG
ASV38696	802	-0.918022	TRUE	TRUE	Malawi (Rural)	d__Bacteria	Bacteroidota	Bacteroidales	Prevotellaceae	uncultured	Human (USA/Malawi/Venezuela)	TACGGAAGGTCCGGGCGTTATCCGGATTTATTGGGTTTAAAGGGAGCGTAGGCCGTCTTTTAAGCGTGTTGTGAAATACTGTCGCTCAACGACAGAGGTG
ASV3876	468	1.10976	TRUE	FALSE	Venezuela (Rural)	d__Bacteria	Firmicutes	Peptostreptococcales-Tissierellales	Peptostreptococcales-Tissierellales	Ezakiella	Human (USA/Malawi/Venezuela)	TACGTATGGAGCGAGCGTTGTCCGGAATTATTGGGCGTAAAGGGTGCGCAGGCGGCTTTACAAGTTGGATGTGAAATATTGTGGCTCAACCACAAACGTG
ASV3876	486	-0.610419	TRUE	FALSE	Malawi (Rural)	d__Bacteria	Firmicutes	Peptostreptococcales-Tissierellales	Peptostreptococcales-Tissierellales	Ezakiella	Human (USA/Malawi/Venezuela)	TACGTATGGAGCGAGCGTTGTCCGGAATTATTGGGCGTAAAGGGTGCGCAGGCGGCTTTACAAGTTGGATGTGAAATATTGTGGCTCAACCACAAACGTG
ASV3878	560	-0.733004	TRUE	FALSE	Malawi (Rural)	d__Bacteria	Firmicutes	Oscillospirales	NA	NA	Human (USA/Malawi/Venezuela)	TACGTAGGGAGCGAGCGTTGTCCGGAATTACTGGGTGTAAAGGGAGCGTAGGCGGGGTTGCAAGTTGAATGTGAAACCTACCGGCTTAACTGGTAGACTG
ASV3878	452	0.724127	TRUE	FALSE	Venezuela (Rural)	d__Bacteria	Firmicutes	Oscillospirales	NA	NA	Human (USA/Malawi/Venezuela)	TACGTAGGGAGCGAGCGTTGTCCGGAATTACTGGGTGTAAAGGGAGCGTAGGCGGGGTTGCAAGTTGAATGTGAAACCTACCGGCTTAACTGGTAGACTG
ASV38853	555	-0.262512	TRUE	FALSE	Malawi (Rural)	d__Bacteria	Firmicutes	Oscillospirales	Ethanoligenenaceae	NA	Human (USA/Malawi/Venezuela)	TACGTAGGTGGCAAGCGTTGTCCGGAATTACTGGGTGTAAAGGGAGCGTAGGCGGGTCAGCAAGTTGAATGTTAAATCTACCGGCTCAACTGGTAGCAGC
ASV38853	437	0.258187	TRUE	FALSE	Venezuela (Rural)	d__Bacteria	Firmicutes	Oscillospirales	Ethanoligenenaceae	NA	Human (USA/Malawi/Venezuela)	TACGTAGGTGGCAAGCGTTGTCCGGAATTACTGGGTGTAAAGGGAGCGTAGGCGGGTCAGCAAGTTGAATGTTAAATCTACCGGCTCAACTGGTAGCAGC
ASV38929	453	0.649287	TRUE	FALSE	Venezuela (Rural)	d__Bacteria	Firmicutes	NA	NA	NA	Human (USA/Malawi/Venezuela)	TACGTAGGTGGCAAGCGTTGTCCGGAATTACTGGGTGTAAAGGGCGTGTAGGCGGGACTTTAAGTCAGATGTGAAATACCCGGGCTTAACTCGGGAGGTG
ASV38929	545	-0.658175	TRUE	FALSE	Malawi (Rural)	d__Bacteria	Firmicutes	NA	NA	NA	Human (USA/Malawi/Venezuela)	TACGTAGGTGGCAAGCGTTGTCCGGAATTACTGGGTGTAAAGGGCGTGTAGGCGGGACTTTAAGTCAGATGTGAAATACCCGGGCTTAACTCGGGAGGTG
ASV38974	532	-0.486852	TRUE	FALSE	Malawi (Rural)	d__Bacteria	Firmicutes	Christensenellales	Christensenellaceae	Christensenella	Human (USA/Malawi/Venezuela)	TACGTAGGGAGCGAGCGTTGTCCGGAATTACTGGGCGTAAAGGGTGCGTAGGTGGTCAAGTAAGTCAGATGTGAAAGACCGGGGCTTAACCCCGGGATTG
ASV38984	737	0.166482	TRUE	TRUE	USA (Urban)	d__Bacteria	Firmicutes	Lachnospirales	Lachnospiraceae	NA	Human (USA/Malawi/Venezuela)	TACGTAGGGGGCAAGCGTTATCCGGAATTACTGGGTGTAAAGGGAGCGTAGGCGGCATGGTAAGCCAGATGTGAAAGCCTTGGGCTTAACCCGAGGATTG
ASV38984	698	-0.174433	TRUE	TRUE	USA (Urban)	d__Bacteria	Firmicutes	Lachnospirales	Lachnospiraceae	NA	Human (USA/Malawi/Venezuela)	TACGTAGGGGGCAAGCGTTATCCGGAATTACTGGGTGTAAAGGGAGCGTAGGCGGCATGGTAAGCCAGATGTGAAAGCCTTGGGCTTAACCCGAGGATTG
ASV38989	601	0.513939	TRUE	FALSE	USA (Urban)	d__Bacteria	Firmicutes	Oscillospirales	Oscillospiraceae	UCG-005	Human (USA/Malawi/Venezuela)	TACGTAGGTGGCAAGCGTTGTCCGGATTTACTGGGTGTAAAGGGCGTGTAGGCGGAGCTGCAAGTCAGATGTGAAATCTCCGGGCTTAACCCGGAAACTG
ASV38989	512	-0.522684	TRUE	FALSE	USA (Urban)	d__Bacteria	Firmicutes	Oscillospirales	Oscillospiraceae	UCG-005	Human (USA/Malawi/Venezuela)	TACGTAGGTGGCAAGCGTTGTCCGGATTTACTGGGTGTAAAGGGCGTGTAGGCGGAGCTGCAAGTCAGATGTGAAATCTCCGGGCTTAACCCGGAAACTG
ASV39055	786	0.773769	TRUE	TRUE	USA (Urban)	d__Bacteria	Firmicutes	NA	NA	NA	Human (USA/Malawi/Venezuela)	TACGTAGGTGGCAAGCGTTGTCCGGATTTACTGGGTGTAAAGGGCGTGTAGGCGGGAAGACAGGTCAGATGTGAAATACCGGGGCTCAACTCCGGAGCTG
ASV39055	753	-0.574504	TRUE	TRUE	USA (Urban)	d__Bacteria	Firmicutes	NA	NA	NA	Human (USA/Malawi/Venezuela)	TACGTAGGTGGCAAGCGTTGTCCGGATTTACTGGGTGTAAAGGGCGTGTAGGCGGGAAGACAGGTCAGATGTGAAATACCGGGGCTCAACTCCGGAGCTG
ASV39093	437	0.737665	TRUE	FALSE	Venezuela (Rural)	d__Bacteria	Firmicutes	Christensenellales	Christensenellaceae	Christensenellaceae_R-7_group	Human (USA/Malawi/Venezuela)	TACGTAGGGGGCGAGCGTTGTCCGGAATGACTGGGCGTAAAGGGCGTGTAGGCGGCTTTTTAAGTCTGGAGTGAAAGCCCCATTTTCAAGGTGGGGAGTG
ASV39093	514	-0.744962	TRUE	FALSE	Malawi (Rural)	d__Bacteria	Firmicutes	Christensenellales	Christensenellaceae	Christensenellaceae_R-7_group	Human (USA/Malawi/Venezuela)	TACGTAGGGGGCGAGCGTTGTCCGGAATGACTGGGCGTAAAGGGCGTGTAGGCGGCTTTTTAAGTCTGGAGTGAAAGCCCCATTTTCAAGGTGGGGAGTG
ASV39114	446	-1.08293	TRUE	FALSE	USA (Urban)	d__Bacteria	Firmicutes	Erysipelotrichales	Erysipelatoclostridiaceae	Erysipelotrichaceae_UCG-003	Human (USA/Malawi/Venezuela)	TACGTAGGTGGCGAGCGTTATCCGGAATTATTGGGCGTAAAGAGGGAGCAGGCGGCACTAAGGGTCTGTGGTGAAAGATCGAAGCTTAACTTCGGTAAGC
ASV39115	863	2.0447	TRUE	TRUE	USA (Urban)	d__Bacteria	Firmicutes	Oscillospirales	Oscillospiraceae	uncultured	Human (USA/Malawi/Venezuela)	TACGTAGGGAGCGAGCGTTATCCGGATTTACTGGGTGTAAAGGGCGTGTAGGCGGGGAAGCAAGTCAGATGTGAAAACCAGTGGCTCAACCACTGGCCTG
ASV39115	841	-2.00787	TRUE	TRUE	USA (Urban)	d__Bacteria	Firmicutes	Oscillospirales	Oscillospiraceae	uncultured	Human (USA/Malawi/Venezuela)	TACGTAGGGAGCGAGCGTTATCCGGATTTACTGGGTGTAAAGGGCGTGTAGGCGGGGAAGCAAGTCAGATGTGAAAACCAGTGGCTCAACCACTGGCCTG
ASV3913	459	-0.166029	TRUE	FALSE	Malawi (Rural)	d__Bacteria	Firmicutes	Lachnospirales	Lachnospiraceae	Tuzzerella	Human (USA/Malawi/Venezuela)	TACGTAGGGGGCAAGCGTTATCCGGAATTACTGGGTGTAAAGGGAGCGTAGGCGGCATGGTAAGCCAGATGTGAAAGCCCGGGGCTTAACTCCGAGGATT
ASV39315	846	0.267804	TRUE	TRUE	USA (Urban)	d__Bacteria	Actinobacteriota	Coriobacteriales	Eggerthellaceae	Eggerthella	Human (USA/Malawi/Venezuela)	TACGTAGGGAGCGAGCGTTATCCGGATTCATTGGGCGTAAAGAGCGCGTAGGCGGCCTCTCAAGCGGGATCTCTAATCCGAGGGCTCAACCCCCGGCCGG
ASV39315	814	-0.321698	TRUE	TRUE	USA (Urban)	d__Bacteria	Actinobacteriota	Coriobacteriales	Eggerthellaceae	Eggerthella	Human (USA/Malawi/Venezuela)	TACGTAGGGAGCGAGCGTTATCCGGATTCATTGGGCGTAAAGAGCGCGTAGGCGGCCTCTCAAGCGGGATCTCTAATCCGAGGGCTCAACCCCCGGCCGG
ASV39322	483	0.0521633	TRUE	FALSE	USA (Urban)	d__Bacteria	Firmicutes	Christensenellales	Christensenellaceae	Christensenellaceae_R-7_group	Human (USA/Malawi/Venezuela)	TACGTAGGGGGCGAGCGTTGTCCGGAATGACTGGGCGTAAAGGGCGCGTAGGCGGCTGTGTAAGTCTGGAGTGAAAGTCCTGCTTTTAAGGTGGGAATTG
ASV39358	463	0.393588	TRUE	FALSE	USA (Urban)	d__Bacteria	Firmicutes	Oscillospirales	Ruminococcaceae	DTU089	Human (USA/Malawi/Venezuela)	TACGTAGGGAGCAAGCGTTGTCCGGATTTACTGGGTGTAAAGGGTGCGTAGGCGGATCTGCAAGTCAGTAGTGAAATCCCAGGGCTTAACCCTGGAACTG
ASV3937	665	0.381969	TRUE	TRUE	Venezuela (Rural)	d__Bacteria	Firmicutes	Oscillospirales	UCG-010	UCG-010	Human (USA/Malawi/Venezuela)	TACGTAGGTGGCGAGCGTTATCCGGAATTATTGGGTGTAAAGGGTGCGTAGGCGGGATGTAAAGTCAGATGTGAAATGCCGCGGCTCAACCGCGGAGCTG
ASV3937	724	-0.39468	TRUE	TRUE	Malawi (Rural)	d__Bacteria	Firmicutes	Oscillospirales	UCG-010	UCG-010	Human (USA/Malawi/Venezuela)	TACGTAGGTGGCGAGCGTTATCCGGAATTATTGGGTGTAAAGGGTGCGTAGGCGGGATGTAAAGTCAGATGTGAAATGCCGCGGCTCAACCGCGGAGCTG
ASV39514	816	0.989718	TRUE	TRUE	USA (Urban)	d__Bacteria	Firmicutes	Erysipelotrichales	Erysipelatoclostridiaceae	uncultured	Human (USA/Malawi/Venezuela)	TACGTAGGTGGCAAGCGTTATCCGGAATTATTGGGCGTAAAGGGAGAGTAGGCGGTTTAGAAAGTGTAAAGTAAAAGGCTAGTGCTCAACGCTAGTATGC
ASV39550	761	-0.618197	TRUE	TRUE	USA (Urban)	d__Bacteria	Actinobacteriota	Bifidobacteriales	Bifidobacteriaceae	Bifidobacterium	Human (USA/Malawi/Venezuela)	TACGTAGGGTGCAAGCGTTATCCGGAATTATTGGGCGTAAAGGGCTCGTAGGCGGTTCGTCGCGTCCGGTGTGAAAGTCCATCGCTTAACGGTGGGTCCG
ASV39550	802	0.979099	TRUE	TRUE	USA (Urban)	d__Bacteria	Actinobacteriota	Bifidobacteriales	Bifidobacteriaceae	Bifidobacterium	Human (USA/Malawi/Venezuela)	TACGTAGGGTGCAAGCGTTATCCGGAATTATTGGGCGTAAAGGGCTCGTAGGCGGTTCGTCGCGTCCGGTGTGAAAGTCCATCGCTTAACGGTGGGTCCG
ASV39612	480	0.188517	TRUE	FALSE	USA (Urban)	d__Bacteria	Firmicutes	Oscillospirales	Ruminococcaceae	Incertae_Sedis	Human (USA/Malawi/Venezuela)	TACGTAGGGAGCAAGCGTTGTCCGGATTTACTGGGTGTAAAGGGTGCGTAGGCGGTTTGGTAAGTCAGAAGTGAAATCCATGGGCTTAACCCATGAACTG
ASV39627	435	0.662015	TRUE	FALSE	Venezuela (Rural)	d__Bacteria	Bacteroidota	NA	NA	NA	Human (USA/Malawi/Venezuela)	TACGGAGGATCCGAGCGTTATCCGGATTTATTGGGTTTAAAGGGTGCGTAGGCGGGAAGACAAGTTGGAAGTGAAATCTATGGGCTCAACCCATAAACTG
ASV39627	519	-0.666313	TRUE	FALSE	Malawi (Rural)	d__Bacteria	Bacteroidota	NA	NA	NA	Human (USA/Malawi/Venezuela)	TACGGAGGATCCGAGCGTTATCCGGATTTATTGGGTTTAAAGGGTGCGTAGGCGGGAAGACAAGTTGGAAGTGAAATCTATGGGCTCAACCCATAAACTG
ASV39628	794	1.01928	TRUE	TRUE	USA (Urban)	d__Bacteria	Firmicutes	Oscillospirales	UCG-010	UCG-010	Human (USA/Malawi/Venezuela)	TACGTAGGGAGCGAGCGTTGCCCGGAATTATTGGGTGTAAAGGGTGCGTAGGCGGGATGCCAAGTCAGGCGTGAAATGCCGCAGCTTAACTGCGGAGCTG
ASV39720	589	-0.13306	TRUE	FALSE	USA (Urban)	d__Bacteria	Firmicutes	Christensenellales	Christensenellaceae	uncultured	Human (USA/Malawi/Venezuela)	TACGTAGGGAGCGAGCGTTGTCCGGAATTACTGGGCGTAAAGGGTGCGTAGGCGGCGCAGTTAGTCAGAAGTGAAATATCGGGGCTTAACTCCGGGACTG
ASV39720	665	0.124514	TRUE	TRUE	USA (Urban)	d__Bacteria	Firmicutes	Christensenellales	Christensenellaceae	uncultured	Human (USA/Malawi/Venezuela)	TACGTAGGGAGCGAGCGTTGTCCGGAATTACTGGGCGTAAAGGGTGCGTAGGCGGCGCAGTTAGTCAGAAGTGAAATATCGGGGCTTAACTCCGGGACTG
ASV39759	570	-0.306729	TRUE	FALSE	USA (Urban)	d__Bacteria	Firmicutes	Christensenellales	Christensenellaceae	Christensenellaceae_R-7_group	Human (USA/Malawi/Venezuela)	TACGTAGGGGGCGAGCGTTGTCCGGAATTATTGGGCGTAAAGGGCGCGTAGACGGCTGTGTAAGTTATAGGTGAAAGCCCAACTTTCAAGGTTGGAACTG
ASV39759	696	0.222033	TRUE	TRUE	USA (Urban)	d__Bacteria	Firmicutes	Christensenellales	Christensenellaceae	Christensenellaceae_R-7_group	Human (USA/Malawi/Venezuela)	TACGTAGGGGGCGAGCGTTGTCCGGAATTATTGGGCGTAAAGGGCGCGTAGACGGCTGTGTAAGTTATAGGTGAAAGCCCAACTTTCAAGGTTGGAACTG
ASV39828	587	-1.08268	TRUE	FALSE	USA (Urban)	d__Bacteria	Firmicutes	Lachnospirales	Lachnospiraceae	Coprococcus	Human (USA/Malawi/Venezuela)	TACGTATGGTGCAAGCGTTATCCGGATTTACTGGGTGTAAAGGGAGCGTAGACGGCTGTGTAAGTCTGAAGTGAAAGCCCGGGGCTCAACCCCGGGACTG
ASV39828	768	1.86585	TRUE	TRUE	USA (Urban)	d__Bacteria	Firmicutes	Lachnospirales	Lachnospiraceae	Coprococcus	Human (USA/Malawi/Venezuela)	TACGTATGGTGCAAGCGTTATCCGGATTTACTGGGTGTAAAGGGAGCGTAGACGGCTGTGTAAGTCTGAAGTGAAAGCCCGGGGCTCAACCCCGGGACTG
ASV39848	572	-0.335115	TRUE	FALSE	Malawi (Rural)	d__Bacteria	Firmicutes	uncultured	uncultured	uncultured	Human (USA/Malawi/Venezuela)	TACGTAGGTGGCGAGCGTTGTCCGGAATGACTGGGCGTAAAGGGCGTGTAGGTGGACTGATCAGTCGGATGTGAAAGCCCCAGGCTTAACCTGGGAACCG
ASV39942	813	0.291566	TRUE	TRUE	Venezuela (Rural)	d__Bacteria	Firmicutes	Oscillospirales	UCG-010	UCG-010	Human (USA/Malawi/Venezuela)	TACGTAGGTGGCAAGCGTTATCCGGATTTATTGGGTGTAAAGGGTGAGTAGGCGGGCTGACAAGTCAGATGTGAAATGTTCAGGCTTAACCTGAGAACTG
ASV39942	818	0.25736	TRUE	TRUE	USA (Urban)	d__Bacteria	Firmicutes	Oscillospirales	UCG-010	UCG-010	Human (USA/Malawi/Venezuela)	TACGTAGGTGGCAAGCGTTATCCGGATTTATTGGGTGTAAAGGGTGAGTAGGCGGGCTGACAAGTCAGATGTGAAATGTTCAGGCTTAACCTGAGAACTG
ASV39972	803	0.154758	TRUE	TRUE	USA (Urban)	d__Bacteria	Firmicutes	Oscillospirales	UCG-010	UCG-010	Human (USA/Malawi/Venezuela)	TACGTAGGTGGCGAGCGTTATCCGGAATTACTGGGTGTAAAGGGTGTGTAGGCGGGGAGGCAAGTCAGATGTGAAAACTATGGGCTCAACCCATAAAGTG
ASV39990	568	0.292934	TRUE	FALSE	USA (Urban)	d__Bacteria	Firmicutes	Lachnospirales	Lachnospiraceae	Roseburia	Human (USA/Malawi/Venezuela)	TACGTATGGTGCAAGCGTTATCCGGATTTACTGGGTGTAAAGGGAGCGCAGGCGGTACGGCAAGTCTGATGTGAAAGCCCGGGGCTCAACCCCGGTACTG
ASV40062	467	0.377526	TRUE	FALSE	USA (Urban)	d__Bacteria	Firmicutes	Oscillospirales	Ruminococcaceae	NA	Human (USA/Malawi/Venezuela)	AACGTAGGTGGCAAGCGTTGTCCGGAATTACTGGGTGTAAAGGGAGCGCAGGCGGGAGAGCAAGTTGGGAGTGAAATCTGTGGGCTCAACCCACAAATTG
ASV40114	588	1.22957	TRUE	FALSE	USA (Urban)	d__Bacteria	Firmicutes	Peptostreptococcales-Tissierellales	Anaerovoracaceae	Family_XIII_AD3011_group	Human (USA/Malawi/Venezuela)	TACGTAGGGGGCAAGCGTTATCCGGAATTATTGGGCGTAAAGAGTACGTAGGTGGTTACCTAAGCACGAGGTATAAGGCAATGGCTTAACCATTGTTCGC
ASV40114	545	-1.11564	TRUE	FALSE	USA (Urban)	d__Bacteria	Firmicutes	Peptostreptococcales-Tissierellales	Anaerovoracaceae	Family_XIII_AD3011_group	Human (USA/Malawi/Venezuela)	TACGTAGGGGGCAAGCGTTATCCGGAATTATTGGGCGTAAAGAGTACGTAGGTGGTTACCTAAGCACGAGGTATAAGGCAATGGCTTAACCATTGTTCGC
ASV40164	794	0.0954977	TRUE	TRUE	Venezuela (Rural)	d__Bacteria	Firmicutes	Oscillospirales	Oscillospiraceae	NA	Human (USA/Malawi/Venezuela)	TACGTAGGTGGCAAGCGTTGTCCGGATTTACTGGGTGTAAAGGGCGTGTAGGCGGGATTGCAAGTCAGGCGTGAAAACCAGGGGCTCAACCTCTGGCCTG
ASV40164	833	-0.27552	TRUE	TRUE	Malawi (Rural)	d__Bacteria	Firmicutes	Oscillospirales	Oscillospiraceae	NA	Human (USA/Malawi/Venezuela)	TACGTAGGTGGCAAGCGTTGTCCGGATTTACTGGGTGTAAAGGGCGTGTAGGCGGGATTGCAAGTCAGGCGTGAAAACCAGGGGCTCAACCTCTGGCCTG
ASV40178	488	-0.666098	TRUE	FALSE	Malawi (Rural)	d__Bacteria	Firmicutes	Veillonellales-Selenomonadales	Veillonellaceae	Veillonella	Human (USA/Malawi/Venezuela)	TACGTAGGTGGCAAGCGTTGTCCGGAATTATTGGGCGTAAAGCGCGCGCAGGCGGATAGGTCAGTCTGTCTTAAAAGTTCGGGGCTTAACCCCGTGATGG
ASV40179	831	3.24794	TRUE	TRUE	Venezuela (Rural)	d__Bacteria	Firmicutes	Erysipelotrichales	Erysipelotrichaceae	Holdemanella	Human (USA/Malawi/Venezuela)	TACGTAGGTGGCGAGCGTTATCCGGAATGATTGGGCGTAAAGGGTGCGTAGGTGGCAGAACAAGTCTGGAGTAAAAGGTATGGGCTCAACCCGTACTGGC
ASV40179	818	-2.33936	TRUE	TRUE	Malawi (Rural)	d__Bacteria	Firmicutes	Erysipelotrichales	Erysipelotrichaceae	Holdemanella	Human (USA/Malawi/Venezuela)	TACGTAGGTGGCGAGCGTTATCCGGAATGATTGGGCGTAAAGGGTGCGTAGGTGGCAGAACAAGTCTGGAGTAAAAGGTATGGGCTCAACCCGTACTGGC
ASV40266	454	0.356666	TRUE	FALSE	USA (Urban)	d__Bacteria	Firmicutes	Lachnospirales	Lachnospiraceae	Sellimonas	Human (USA/Malawi/Venezuela)	TACGTATGGTGCAAGCGTTATCCGGATTTACTGGGTGTAAAGGGAGCGTAGACGGATAGGCAAGTCTGGAGTGAAAACCCAGGGCTCAACCCTGGGACTG
ASV40291	507	-0.882918	TRUE	FALSE	Malawi (Rural)	d__Bacteria	Firmicutes	Lachnospirales	Lachnospiraceae	NA	Human (USA/Malawi/Venezuela)	TACGTAGGGGGCAAGCGTTATCCGGATTTACTGGGTGTAAAGGGAGCGCAGGCGGTGCGGCAAGTCTGATGTGAAAGTTTGCGGCTCAACCGTAAAATTG
ASV40299	527	-0.148962	TRUE	FALSE	Malawi (Rural)	d__Bacteria	Firmicutes	Lactobacillales	Streptococcaceae	Streptococcus	Human (USA/Malawi/Venezuela)	TACGTAGGTCCCGAGCGTTGTCCGGATTTATTGGGCGTAAAGCGAGCGCAGGCGGTTAGATAAGTCTGAAGTTAAAGGCTGTGGCTTAACCATAGTACGC
ASV40299	752	-0.823858	TRUE	TRUE	USA (Urban)	d__Bacteria	Firmicutes	Lactobacillales	Streptococcaceae	Streptococcus	Human (USA/Malawi/Venezuela)	TACGTAGGTCCCGAGCGTTGTCCGGATTTATTGGGCGTAAAGCGAGCGCAGGCGGTTAGATAAGTCTGAAGTTAAAGGCTGTGGCTTAACCATAGTACGC
ASV4036	513	-1.02043	TRUE	FALSE	USA (Urban)	d__Bacteria	Actinobacteriota	Coriobacteriales	Coriobacteriaceae	Collinsella	Human (USA/Malawi/Venezuela)	TACGTAGGGGGCGAGCGTTATCCGGATTCATTGGGCGTAAAGCGCGCGTAGGCGGCCCGGCAGGCCGGGGGGCGAAGCGGGGGGCTCAACCCCCCGAAGC
ASV4036	744	0.478866	TRUE	TRUE	USA (Urban)	d__Bacteria	Actinobacteriota	Coriobacteriales	Coriobacteriaceae	Collinsella	Human (USA/Malawi/Venezuela)	TACGTAGGGGGCGAGCGTTATCCGGATTCATTGGGCGTAAAGCGCGCGTAGGCGGCCCGGCAGGCCGGGGGGCGAAGCGGGGGGCTCAACCCCCCGAAGC
ASV40606	567	0.242251	TRUE	FALSE	USA (Urban)	d__Bacteria	Firmicutes	Oscillospirales	Ruminococcaceae	NA	Human (USA/Malawi/Venezuela)	TACGTAGGGAGCGAGCGTTGTCCGGAATTACTGGGTGTAAAGGGAGCGTAGGCGGGAAGGCAAGTTGGATGTGAAAACTGTGGGCTTAACCGACAGACTG
ASV40648	840	1.93214	TRUE	TRUE	Venezuela (Rural)	d__Bacteria	Firmicutes	Oscillospirales	Oscillospiraceae	Intestinimonas	Human (USA/Malawi/Venezuela)	TACGTAGGTGGCAAGCGTTATCCGGATTTACTGGGTGTAAAGGGCGTGTAGGCGGGAGTGCAAGTCAGATGTGAAAATTATGGGCTCAACCCATAACCTG
ASV40648	861	-1.28337	TRUE	TRUE	Malawi (Rural)	d__Bacteria	Firmicutes	Oscillospirales	Oscillospiraceae	Intestinimonas	Human (USA/Malawi/Venezuela)	TACGTAGGTGGCAAGCGTTATCCGGATTTACTGGGTGTAAAGGGCGTGTAGGCGGGAGTGCAAGTCAGATGTGAAAATTATGGGCTCAACCCATAACCTG
ASV40715	479	0.13589	TRUE	FALSE	USA (Urban)	d__Bacteria	Desulfobacterota	Desulfovibrionales	Desulfovibrionaceae	Desulfovibrio	Human (USA/Malawi/Venezuela)	TACGGAGGGTGCAAGCGTTAATCGGAATTACTGGGCGTAAAGCGCACGTAGGCTGTAGTGTAAGTCAGGGGTGAAATCCCACGGCTCAACCGTGGAACTG
ASV40727	448	0.29421	TRUE	FALSE	USA (Urban)	d__Bacteria	Bacteroidota	Bacteroidales	Rikenellaceae	Alistipes	Human (USA/Malawi/Venezuela)	TACGGAGGATCCGAGCGTTATCCGGATTTATTGGGTTTAAAGGGTGCGTAGGCGGTTTGATAAGTTAGAGGTGAAAGCTCGATGCTCAACATCGAAATTG
ASV40775	479	0.368179	TRUE	FALSE	Venezuela (Rural)	d__Bacteria	Firmicutes	Oscillospirales	NA	NA	Human (USA/Malawi/Venezuela)	TACGTAGGTGGCAAGCGTTGTCCGGAATTACTGGGTGTAAAGGGAGCGTAGGCGGGAGTGCAAGTTGAATGTGAAAACGATGGGCTCAACCCATCGTTGC
ASV40775	582	-0.374857	TRUE	FALSE	Malawi (Rural)	d__Bacteria	Firmicutes	Oscillospirales	NA	NA	Human (USA/Malawi/Venezuela)	TACGTAGGTGGCAAGCGTTGTCCGGAATTACTGGGTGTAAAGGGAGCGTAGGCGGGAGTGCAAGTTGAATGTGAAAACGATGGGCTCAACCCATCGTTGC
ASV40853	519	-0.761056	TRUE	FALSE	Malawi (Rural)	d__Bacteria	Firmicutes	Lachnospirales	Lachnospiraceae	Lachnospiraceae_UCG-010	Human (USA/Malawi/Venezuela)	TACGTAGGGGGCAAGCGTTATCCGGAATTACTGGGTGTAAAGGGAGCGTAGGCGGCATGGTAAGCCAGATGTGAAAGCCCGAGGCTTAACTTCGAGGATT
ASV40864	701	1.12621	TRUE	TRUE	Venezuela (Rural)	d__Bacteria	Firmicutes	RF39	RF39	RF39	Human (USA/Malawi/Venezuela)	TACGTAGGGGGCGAGCGTTATCCGGATTTATTGGGCGTAAAGCGTGTGTAGGCGGTTTATTAAGTTTAAGATTAAAGCCCGGGGCTCAACTCCGGTAAGT
ASV40864	589	-0.291709	TRUE	FALSE	Malawi (Rural)	d__Bacteria	Firmicutes	RF39	RF39	RF39	Human (USA/Malawi/Venezuela)	TACGTAGGGGGCGAGCGTTATCCGGATTTATTGGGCGTAAAGCGTGTGTAGGCGGTTTATTAAGTTTAAGATTAAAGCCCGGGGCTCAACTCCGGTAAGT
ASV40875	540	-0.409523	TRUE	FALSE	Malawi (Rural)	d__Bacteria	Firmicutes	Oscillospirales	Ruminococcaceae	NA	Human (USA/Malawi/Venezuela)	TACGTAGGGAGCGAGCGTTGTCCGGAATTACTGGGTGTAAAGGGAGCGTAGGCGGGATCGCAAGTTGGATGTCTAATCTATCGGCTCAACCGGTATTCGC
ASV40875	440	0.404758	TRUE	FALSE	Venezuela (Rural)	d__Bacteria	Firmicutes	Oscillospirales	Ruminococcaceae	NA	Human (USA/Malawi/Venezuela)	TACGTAGGGAGCGAGCGTTGTCCGGAATTACTGGGTGTAAAGGGAGCGTAGGCGGGATCGCAAGTTGGATGTCTAATCTATCGGCTCAACCGGTATTCGC
ASV4092	528	-0.556283	TRUE	FALSE	Malawi (Rural)	d__Bacteria	Firmicutes	Oscillospirales	Ruminococcaceae	NA	Human (USA/Malawi/Venezuela)	TACGTAGGTGGCAAGCGTTGTCCGGAATTACTGGGTGTAAAGGGAGCGTAGGCGGGGTGCCAAGTTGAATGTGAAATCGGCCGGCTTAACTGGTCGCTGC
ASV40994	504	-0.341325	TRUE	FALSE	Malawi (Rural)	d__Bacteria	Actinobacteriota	Actinomycetales	Actinomycetaceae	F0332	Human (USA/Malawi/Venezuela)	TACGTAGGGCGCGAGCGTTGTCCGGAATTATTGGGCGTAAAGGGCTCGTAGGCGGCTTGTCGCGTCTGCTGTGAAAATGCGGGGCTTAACTCCGTACGTG
ASV40996	587	-0.922635	TRUE	FALSE	USA (Urban)	d__Bacteria	Firmicutes	Lachnospirales	Lachnospiraceae	NA	Human (USA/Malawi/Venezuela)	TACGTAGGGGGCAAGCGTTATCCGGATTTACTGGGTGTAAAGGGAGCGTAGACGGCACGGCAAGCCAGATGTGAAAGCCCGGGGCTCAACCCCGGGACTG
ASV40996	658	0.839633	TRUE	TRUE	USA (Urban)	d__Bacteria	Firmicutes	Lachnospirales	Lachnospiraceae	NA	Human (USA/Malawi/Venezuela)	TACGTAGGGGGCAAGCGTTATCCGGATTTACTGGGTGTAAAGGGAGCGTAGACGGCACGGCAAGCCAGATGTGAAAGCCCGGGGCTCAACCCCGGGACTG
ASV4103	586	-0.299634	TRUE	FALSE	USA (Urban)	d__Bacteria	Firmicutes	Clostridia_UCG-014	Clostridia_UCG-014	Clostridia_UCG-014	Human (USA/Malawi/Venezuela)	TACGTAGGGAGCAAGCGTTATCCGGATTTATTGGGTGTAAAGGGTGCGTAGACGGGAAAACAAGTTAGTTGTGAAATCCCTCGGCTTAACTGAGGAACTG
ASV4103	734	0.350815	TRUE	TRUE	USA (Urban)	d__Bacteria	Firmicutes	Clostridia_UCG-014	Clostridia_UCG-014	Clostridia_UCG-014	Human (USA/Malawi/Venezuela)	TACGTAGGGAGCAAGCGTTATCCGGATTTATTGGGTGTAAAGGGTGCGTAGACGGGAAAACAAGTTAGTTGTGAAATCCCTCGGCTTAACTGAGGAACTG
ASV41076	522	-0.537162	TRUE	FALSE	Malawi (Rural)	d__Bacteria	Firmicutes	NA	NA	NA	Human (USA/Malawi/Venezuela)	TACGTAGGGAGCGAGCGTTGTCCGGAATTACTGGGCGTAAAGGGCGCGTAGGCGGGGACTTAAGTTAGGTGTGAAAACTTCGGGCTTAACCTGAAGACTG
ASV41146	536	0.0252834	TRUE	FALSE	USA (Urban)	d__Bacteria	Firmicutes	Lachnospirales	Lachnospiraceae	Blautia	Human (USA/Malawi/Venezuela)	TACGTAGGGGGCAAGCGTTATCCGGATTTACTGGGTGTAAAGGGAGCGTAGACGGCATAACAAGTCTGATGTGAAAGGCTGGGGCTTAACCCCGGGACTG
ASV41289	732	-1.02381	TRUE	TRUE	USA (Urban)	d__Bacteria	Firmicutes	Oscillospirales	Ruminococcaceae	uncultured	Human (USA/Malawi/Venezuela)	TACGTAGGGAGCAAGCGTTGTCCGGATTTACTGGGTGTAAAGGGTGCGTAGGCGGGATATCAAGTCAGACGTGAAATCCATCGGCTTAACTGATGAACTG
ASV41289	521	0.276711	TRUE	FALSE	USA (Urban)	d__Bacteria	Firmicutes	Oscillospirales	Ruminococcaceae	uncultured	Human (USA/Malawi/Venezuela)	TACGTAGGGAGCAAGCGTTGTCCGGATTTACTGGGTGTAAAGGGTGCGTAGGCGGGATATCAAGTCAGACGTGAAATCCATCGGCTTAACTGATGAACTG
ASV41472	533	0.309726	TRUE	FALSE	USA (Urban)	d__Bacteria	Firmicutes	Oscillospirales	Ruminococcaceae	Faecalibacterium	Human (USA/Malawi/Venezuela)	AACGTAGGTCCCAAGCGTTGTCCGGAATTACTGGGTGTAAAGGGAGCGCAGGCGGGAAGACAAGTTGGAAGTGAAATCTATGGGCTCAACCCATAAACTG
ASV41478	493	-0.430938	TRUE	FALSE	Malawi (Rural)	d__Bacteria	Firmicutes	Clostridia_UCG-014	Clostridia_UCG-014	Clostridia_UCG-014	Human (USA/Malawi/Venezuela)	TACGTAGGGAGCGAGCGTTATCCGGATTTATTGGGTGTAAAGGGTGCGTAGACGGGAATACAAGTTAGTTGTGAAATACCTCGGCTTAACTGAGGAACTG
ASV41478	625	0.75007	TRUE	TRUE	Venezuela (Rural)	d__Bacteria	Firmicutes	Clostridia_UCG-014	Clostridia_UCG-014	Clostridia_UCG-014	Human (USA/Malawi/Venezuela)	TACGTAGGGAGCGAGCGTTATCCGGATTTATTGGGTGTAAAGGGTGCGTAGACGGGAATACAAGTTAGTTGTGAAATACCTCGGCTTAACTGAGGAACTG
ASV41529	628	0.487882	TRUE	TRUE	USA (Urban)	d__Bacteria	Bacteroidota	Bacteroidales	Rikenellaceae	Alistipes	Human (USA/Malawi/Venezuela)	TACGGAGGACCCGAGCGTTATCCGGATTTATTGGGTTTAAAGGGTGCGTAGGCGGATTAGTAAGTTAGAGGTGAAAGCTCGATGCTCAACATCGAAATTG
ASV41529	539	-0.224031	TRUE	FALSE	USA (Urban)	d__Bacteria	Bacteroidota	Bacteroidales	Rikenellaceae	Alistipes	Human (USA/Malawi/Venezuela)	TACGGAGGACCCGAGCGTTATCCGGATTTATTGGGTTTAAAGGGTGCGTAGGCGGATTAGTAAGTTAGAGGTGAAAGCTCGATGCTCAACATCGAAATTG
ASV41583	716	0.197452	TRUE	TRUE	USA (Urban)	d__Bacteria	Firmicutes	Lachnospirales	Lachnospiraceae	NA	Human (USA/Malawi/Venezuela)	TACGTAGGGGGCAAGCGTTATCCGGATTTACTGGGTGTAAAGGGAGCGTAGGTGGCAAGGCAAGTCAGATGTGAAAACCCGGGGCTCAACCCCGGGACTG
ASV41651	477	0.172626	TRUE	FALSE	USA (Urban)	d__Bacteria	Firmicutes	Oscillospirales	Oscillospiraceae	UCG-005	Human (USA/Malawi/Venezuela)	TACGTAGGTGGCAAGCGTTGTCCGGATTTACTGGGTGTAAAGGGCGTGTAGGCGGGAAGACAGGTCAGATGTGAAATGTCGGGGCTCAACCCCGGAACTG
ASV41733	774	0.228258	TRUE	TRUE	USA (Urban)	d__Bacteria	Firmicutes	Monoglobales	Monoglobaceae	Monoglobus	Human (USA/Malawi/Venezuela)	TACGTAGGTGGCGAGCGTTGTCCGGATTTACTGGGTGTAAAGGGCGTGTAGGCGGGATTACAAGTCAGATGTGAAATACCGGGGCTTAACTCCGGGGCTG
ASV41733	758	-0.516014	TRUE	TRUE	USA (Urban)	d__Bacteria	Firmicutes	Monoglobales	Monoglobaceae	Monoglobus	Human (USA/Malawi/Venezuela)	TACGTAGGTGGCGAGCGTTGTCCGGATTTACTGGGTGTAAAGGGCGTGTAGGCGGGATTACAAGTCAGATGTGAAATACCGGGGCTTAACTCCGGGGCTG
ASV4175	866	-1.79536	TRUE	TRUE	Malawi (Rural)	d__Bacteria	Firmicutes	Oscillospirales	Oscillospiraceae	UCG-005	Human (USA/Malawi/Venezuela)	TACGTAGGTTGCGAGCGTTGTCCGGATTTACTGGGTGTAAAGGGCGTGTAGGCGGAGATGCAAGTTGGGAGTGAAATCCATGGGCTCAACCCATGAACTG
ASV4175	836	1.59273	TRUE	TRUE	Venezuela (Rural)	d__Bacteria	Firmicutes	Oscillospirales	Oscillospiraceae	UCG-005	Human (USA/Malawi/Venezuela)	TACGTAGGTTGCGAGCGTTGTCCGGATTTACTGGGTGTAAAGGGCGTGTAGGCGGAGATGCAAGTTGGGAGTGAAATCCATGGGCTCAACCCATGAACTG
ASV41817	582	-0.813843	TRUE	FALSE	Malawi (Rural)	d__Bacteria	Firmicutes	Oscillospirales	NA	NA	Human (USA/Malawi/Venezuela)	TACGTAGGGAGCAAGCGTTGTCCGGAATTACTGGGTGTAAAGGGAGCGTAGGCGGGAATGCAAGTTGAATGTCAAATCTACCGGCTTAACTGGTAGCCGC
ASV41817	508	0.807527	TRUE	FALSE	Venezuela (Rural)	d__Bacteria	Firmicutes	Oscillospirales	NA	NA	Human (USA/Malawi/Venezuela)	TACGTAGGGAGCAAGCGTTGTCCGGAATTACTGGGTGTAAAGGGAGCGTAGGCGGGAATGCAAGTTGAATGTCAAATCTACCGGCTTAACTGGTAGCCGC
ASV4182	792	-0.207903	TRUE	TRUE	USA (Urban)	d__Bacteria	Firmicutes	Oscillospirales	Ruminococcaceae	uncultured	Human (USA/Malawi/Venezuela)	TACGTAGGGAGCGAGCGTTGTCCGGATTTACTGGGTGTAAAGGGTGCGTAGGCGGGAAAGCAAGTCAGGTGTGAAATACCGGGGCTCAACTCCGGGGCTG
ASV4182	831	0.209903	TRUE	TRUE	USA (Urban)	d__Bacteria	Firmicutes	Oscillospirales	Ruminococcaceae	uncultured	Human (USA/Malawi/Venezuela)	TACGTAGGGAGCGAGCGTTGTCCGGATTTACTGGGTGTAAAGGGTGCGTAGGCGGGAAAGCAAGTCAGGTGTGAAATACCGGGGCTCAACTCCGGGGCTG
ASV41827	781	2.36223	TRUE	TRUE	USA (Urban)	d__Bacteria	Firmicutes	Christensenellales	Christensenellaceae	Christensenellaceae_R-7_group	Human (USA/Malawi/Venezuela)	TACGTAGGGAGCGAGCGTTGTCCGGAATTACTGGGCGTAAAGGGTGCGTAGGCGGTCTGAAAAGTCGGATGTGAAATCCCCGTGCTTAACATGGGAGCTG
ASV41878	843	-0.417682	TRUE	TRUE	Malawi (Rural)	d__Bacteria	Cyanobacteria	Gastranaerophilales	Gastranaerophilales	Gastranaerophilales	Human (USA/Malawi/Venezuela)	TACGGAGGGTGCAAGCGTTGTCCGGAATCATTGGGCGTAAAGAGTTCGTAGGCGGCATGTAAAGTCAGGTGTTAAAGGCTGAGGCTCAACCTCAGTATGG
ASV41884	783	0.375583	TRUE	TRUE	USA (Urban)	d__Bacteria	Firmicutes	Oscillospirales	UCG-010	UCG-010	Human (USA/Malawi/Venezuela)	TACGTAGGTGGCAAGCGTTATCCGGAATTACTGGGTGTAAAGGGTGTGTAGGCGGGACTGCAAGTCAGATGTGAAAATCATGGGCTCAACCCATGACCTG
ASV41896	458	0.0823282	TRUE	FALSE	USA (Urban)	d__Bacteria	Firmicutes	Oscillospirales	Ruminococcaceae	Angelakisella	Human (USA/Malawi/Venezuela)	TACGTAGGGAGCGAGCGTTGTCCGGAATTACTGGGTGTAAAGGGAGCGTAGGCGGGAAGGCAAGTTGGATGTGAAAACTGTGGGCTCAACCGACAGACTG
ASV41906	488	0.349328	TRUE	FALSE	Venezuela (Rural)	d__Bacteria	Firmicutes	Oscillospirales	NA	NA	Human (USA/Malawi/Venezuela)	TACGTAGGGAGCAAGCGTTGTCCGGAATTACTGGGTGTAAAGGGAGCGTAGGCGGGGATACAAGTTGGATGTTTAATCTACCGGCTCAACTGGTAGCTGC
ASV41906	671	-0.846207	TRUE	TRUE	Malawi (Rural)	d__Bacteria	Firmicutes	Oscillospirales	NA	NA	Human (USA/Malawi/Venezuela)	TACGTAGGGAGCAAGCGTTGTCCGGAATTACTGGGTGTAAAGGGAGCGTAGGCGGGGATACAAGTTGGATGTTTAATCTACCGGCTCAACTGGTAGCTGC
ASV42003	842	-2.122	TRUE	TRUE	Malawi (Rural)	d__Bacteria	Bacteroidota	Bacteroidales	Prevotellaceae	Prevotella	Human (USA/Malawi/Venezuela)	TACGGAAGGTCCGGGCGTTATCCGGATTTATTGGGTTTAAAGGGAGCGTAGGCCGCAGGTTAAGCGTGTTGTGAAATGTAGGGGCTCAACCTCTGCACTG
ASV42053	769	-0.446346	TRUE	TRUE	USA (Urban)	d__Bacteria	Firmicutes	Lachnospirales	Lachnospiraceae	Howardella	Human (USA/Malawi/Venezuela)	TACGTATGGGGCAAGCGTTATCCGGATTTACTGGGTGTAAAGGGAGTGTAGGCGGCAGTACAAGTCAGGAGTGAAAACTTGGGGCTCAACCCCAAGACTG
ASV42053	770	0.367672	TRUE	TRUE	USA (Urban)	d__Bacteria	Firmicutes	Lachnospirales	Lachnospiraceae	Howardella	Human (USA/Malawi/Venezuela)	TACGTATGGGGCAAGCGTTATCCGGATTTACTGGGTGTAAAGGGAGTGTAGGCGGCAGTACAAGTCAGGAGTGAAAACTTGGGGCTCAACCCCAAGACTG
ASV4211	816	0.330439	TRUE	TRUE	USA (Urban)	d__Bacteria	Firmicutes	Lactobacillales	Streptococcaceae	Lactococcus	Human (USA/Malawi/Venezuela)	TACGTAGGTCCCGAGCGTTGTCCGGATTTATTGGGCGTAAAGCGAGCGCAGGTGGTTTATTAAGTCTGGTGTAAAAGGCAGTGGCTCAACCATTGTATGC
ASV42135	774	-2.31642	TRUE	TRUE	Malawi (Rural)	d__Bacteria	Firmicutes	Veillonellales-Selenomonadales	Veillonellaceae	Veillonella	Human (USA/Malawi/Venezuela)	TACGTAGGTGGCAAGCGTTGTCCGGAATTATTGGGCGTAAAGCGCGCGCAGGCGGATTGGTCAGTCTGTCTTAAAAGTTCGGGGCTTAACCCCGTGATGG
ASV42191	763	-0.505861	TRUE	TRUE	USA (Urban)	d__Bacteria	Firmicutes	Christensenellales	Christensenellaceae	uncultured	Human (USA/Malawi/Venezuela)	TACGTAGGGAGCAAGCGTTGTCCGGAATTACTGGGCGTAAAGGGTGCGTAGGCGGTTGTTTAAGTCAGATGTGAAATACCCGGGCTTAACTCGGGGGCTG
ASV42244	729	-0.467351	TRUE	TRUE	Malawi (Rural)	d__Bacteria	Firmicutes	DTU014	DTU014	DTU014	Human (USA/Malawi/Venezuela)	TACGTAGGTGGCGAGCGTTGTCCGGAATTACTGGGCGTAAAGGGCGCGTAGGCGGATCGTTAAGTTGGACGTGAAATACCCCGGCTCAACTGGGGGGCGA
ASV42249	549	-0.0499792	TRUE	FALSE	USA (Urban)	d__Bacteria	Firmicutes	Oscillospirales	NA	NA	Human (USA/Malawi/Venezuela)	TACGTAGGTGGCAAGCGTTGTCCGGATTTACTGGGTGTAAAGGGCGTGTAGGCGGGACTGCAAGTCTGATGTGTAATCTGGTGGCTCAACCACCAAACTG
ASV42249	719	-0.305786	TRUE	TRUE	Malawi (Rural)	d__Bacteria	Firmicutes	Oscillospirales	NA	NA	Human (USA/Malawi/Venezuela)	TACGTAGGTGGCAAGCGTTGTCCGGATTTACTGGGTGTAAAGGGCGTGTAGGCGGGACTGCAAGTCTGATGTGTAATCTGGTGGCTCAACCACCAAACTG
ASV42250	720	0.0212634	TRUE	TRUE	USA (Urban)	d__Bacteria	Firmicutes	Oscillospirales	Oscillospiraceae	UCG-005	Human (USA/Malawi/Venezuela)	TACGTAGGTGGCAAGCGTTGTCCGGATTTACTGGGTGTAAAGGGCGTGTAGGCGGGAGAGCAAGTCAGAAGTGAAATCTATGGGCTTAACCCATAAACTG
ASV42250	723	0.712911	TRUE	TRUE	Venezuela (Rural)	d__Bacteria	Firmicutes	Oscillospirales	Oscillospiraceae	UCG-005	Human (USA/Malawi/Venezuela)	TACGTAGGTGGCAAGCGTTGTCCGGATTTACTGGGTGTAAAGGGCGTGTAGGCGGGAGAGCAAGTCAGAAGTGAAATCTATGGGCTTAACCCATAAACTG
ASV42274	717	1.06238	TRUE	TRUE	Venezuela (Rural)	d__Bacteria	Firmicutes	Oscillospirales	Ruminococcaceae	Paludicola	Human (USA/Malawi/Venezuela)	TACGTAGGTAGCGAGCGTTGTCCGGAATTACTGGGTGTAAAGGGAGCGTAGGCGGGATTGCAAGTTGAATGTTAAATCTATGGGCTCAACCCATAGCCGC
ASV42274	785	-1.11114	TRUE	TRUE	Malawi (Rural)	d__Bacteria	Firmicutes	Oscillospirales	Ruminococcaceae	Paludicola	Human (USA/Malawi/Venezuela)	TACGTAGGTAGCGAGCGTTGTCCGGAATTACTGGGTGTAAAGGGAGCGTAGGCGGGATTGCAAGTTGAATGTTAAATCTATGGGCTCAACCCATAGCCGC
ASV42298	692	-0.305654	TRUE	TRUE	USA (Urban)	d__Bacteria	Firmicutes	Lachnospirales	Lachnospiraceae	[Eubacterium]_hallii_group	Human (USA/Malawi/Venezuela)	TACGTATGGAGCAAGCGTTATCCGGATTTACTGGGTGTAAAGGGTGCGTAGGTGGCAGTGCAAGTCAGATGTGAAAGGTCGGGGCTCAACCCCGGAGCTG
ASV42298	739	0.596973	TRUE	TRUE	USA (Urban)	d__Bacteria	Firmicutes	Lachnospirales	Lachnospiraceae	[Eubacterium]_hallii_group	Human (USA/Malawi/Venezuela)	TACGTATGGAGCAAGCGTTATCCGGATTTACTGGGTGTAAAGGGTGCGTAGGTGGCAGTGCAAGTCAGATGTGAAAGGTCGGGGCTCAACCCCGGAGCTG
ASV42386	493	-0.205219	TRUE	FALSE	Malawi (Rural)	d__Bacteria	Firmicutes	Oscillospirales	UCG-010	UCG-010	Human (USA/Malawi/Venezuela)	TACGTAGGTGGCAAGCGTTATCCGGAATTATTGGGTGTAAAGGGTGCGTAGGCGGGATGTAAAGTCAGATGTGAAATTCAGGAGCTCAACTTCTGAACTG
ASV42387	696	-0.0243011	TRUE	TRUE	Malawi (Rural)	d__Bacteria	Firmicutes	Clostridia_UCG-014	Clostridia_UCG-014	Clostridia_UCG-014	Human (USA/Malawi/Venezuela)	TACGTAGGGAGCAAGCGTTATCCGGATTTATTGGGTGTAAAGGGTGCGTAGACGGGACAACAAGTTAGTTGTGAAATCCCTCGGCTTAACTGAGGAACTG
ASV42387	722	0.950527	TRUE	TRUE	Venezuela (Rural)	d__Bacteria	Firmicutes	Clostridia_UCG-014	Clostridia_UCG-014	Clostridia_UCG-014	Human (USA/Malawi/Venezuela)	TACGTAGGGAGCAAGCGTTATCCGGATTTATTGGGTGTAAAGGGTGCGTAGACGGGACAACAAGTTAGTTGTGAAATCCCTCGGCTTAACTGAGGAACTG
ASV4240	445	0.183699	TRUE	FALSE	Venezuela (Rural)	d__Bacteria	Actinobacteriota	Corynebacteriales	Corynebacteriaceae	Corynebacterium	Human (USA/Malawi/Venezuela)	TACGTAGGGTGCGAGCGTTGTCCGGAATTACTGGGCGTAAAGAGCTCGTAGGTGGTTTGTCGCGTCGTCTGTGAAATTCCGGGGCTTAACTCCGGGCGTG
ASV4240	558	-0.0595519	TRUE	FALSE	Malawi (Rural)	d__Bacteria	Actinobacteriota	Corynebacteriales	Corynebacteriaceae	Corynebacterium	Human (USA/Malawi/Venezuela)	TACGTAGGGTGCGAGCGTTGTCCGGAATTACTGGGCGTAAAGAGCTCGTAGGTGGTTTGTCGCGTCGTCTGTGAAATTCCGGGGCTTAACTCCGGGCGTG
ASV42446	762	0.335173	TRUE	TRUE	USA (Urban)	d__Bacteria	Firmicutes	Lachnospirales	Lachnospiraceae	Lachnospiraceae_UCG-010	Human (USA/Malawi/Venezuela)	TACGTAGGGGGCAAGCGTTATCCGGAATTACTGGGTGTAAAGGGAGCGTAGGCGGCACGCCAAGCCAGATGTGAAAGCCCGAGGCTTAACCTCGTGGATT
ASV42446	739	0.407388	TRUE	TRUE	Venezuela (Rural)	d__Bacteria	Firmicutes	Lachnospirales	Lachnospiraceae	Lachnospiraceae_UCG-010	Human (USA/Malawi/Venezuela)	TACGTAGGGGGCAAGCGTTATCCGGAATTACTGGGTGTAAAGGGAGCGTAGGCGGCACGCCAAGCCAGATGTGAAAGCCCGAGGCTTAACCTCGTGGATT
ASV42533	652	-0.726862	TRUE	TRUE	Malawi (Rural)	d__Bacteria	Firmicutes	Peptostreptococcales-Tissierellales	Peptostreptococcales-Tissierellales	Peptoniphilus	Human (USA/Malawi/Venezuela)	TACGTAGGGGGCTAGCGTTGTCCGGAATCACTGGGCGTAAAGGGTTCGCAGGCGGAAATGCAAGTCAGGTGTAAAAGGCAGTAGCTTAACTACTGTAAGC
ASV42533	426	0.557478	TRUE	FALSE	Venezuela (Rural)	d__Bacteria	Firmicutes	Peptostreptococcales-Tissierellales	Peptostreptococcales-Tissierellales	Peptoniphilus	Human (USA/Malawi/Venezuela)	TACGTAGGGGGCTAGCGTTGTCCGGAATCACTGGGCGTAAAGGGTTCGCAGGCGGAAATGCAAGTCAGGTGTAAAAGGCAGTAGCTTAACTACTGTAAGC
ASV42638	472	-0.0830451	TRUE	FALSE	Malawi (Rural)	d__Bacteria	Bacteroidota	Bacteroidales	Barnesiellaceae	Barnesiella	Human (USA/Malawi/Venezuela)	TACGGAGGATGCGAGCGTTATCCGGATTTATTGGGTTTAAAGGGTGCGTAGGCGGCACGCCAAGTCAGCGGTGAAATTTTCGGGCTCAACCCGGACTGTG
ASV42658	439	0.329827	TRUE	FALSE	Venezuela (Rural)	d__Bacteria	Bacteroidota	Bacteroidales	Prevotellaceae	Prevotella	Human (USA/Malawi/Venezuela)	TACGGAAGGTCCGGGCGTTATCCGGATTTATTGGGTTTAAAGGGAGCGTAGGCTGTCTATTAAGCGTGTTGTGAAATTTACCGGCTCAACCGGTGGCTTG
ASV42658	505	-0.442123	TRUE	FALSE	Malawi (Rural)	d__Bacteria	Bacteroidota	Bacteroidales	Prevotellaceae	Prevotella	Human (USA/Malawi/Venezuela)	TACGGAAGGTCCGGGCGTTATCCGGATTTATTGGGTTTAAAGGGAGCGTAGGCTGTCTATTAAGCGTGTTGTGAAATTTACCGGCTCAACCGGTGGCTTG
ASV42671	577	-0.0154514	TRUE	FALSE	Malawi (Rural)	d__Bacteria	Firmicutes	Peptostreptococcales-Tissierellales	Anaerovoracaceae	Mogibacterium	Human (USA/Malawi/Venezuela)	TACGTAGGGGGCAAGCGTTATCCGGAATTATTGGGCGTAAAGAGTGCGTAGGTGGTTACCTAAGCGCAAGGTTTAATTTAGAGGCTCAACCTCTACTTGC
ASV42671	481	0.293982	TRUE	FALSE	Venezuela (Rural)	d__Bacteria	Firmicutes	Peptostreptococcales-Tissierellales	Anaerovoracaceae	Mogibacterium	Human (USA/Malawi/Venezuela)	TACGTAGGGGGCAAGCGTTATCCGGAATTATTGGGCGTAAAGAGTGCGTAGGTGGTTACCTAAGCGCAAGGTTTAATTTAGAGGCTCAACCTCTACTTGC
ASV42723	439	0.567203	TRUE	FALSE	Venezuela (Rural)	d__Bacteria	Verrucomicrobiota	Verrucomicrobiales	Akkermansiaceae	Akkermansia	Human (USA/Malawi/Venezuela)	TACAGAGGTCTCAAGCGTTGTTCGGAATCACTGGGCGTAAAGCGTGCGTAGGCTGTTTCGTAAGTCGTGTGTGAAAGGCGCGGACTCAACCCGCGGACGG
ASV42723	548	-0.599558	TRUE	FALSE	Malawi (Rural)	d__Bacteria	Verrucomicrobiota	Verrucomicrobiales	Akkermansiaceae	Akkermansia	Human (USA/Malawi/Venezuela)	TACAGAGGTCTCAAGCGTTGTTCGGAATCACTGGGCGTAAAGCGTGCGTAGGCTGTTTCGTAAGTCGTGTGTGAAAGGCGCGGACTCAACCCGCGGACGG
ASV42890	558	0.204743	TRUE	FALSE	USA (Urban)	d__Bacteria	Firmicutes	Oscillospirales	Ruminococcaceae	NA	Human (USA/Malawi/Venezuela)	TACGTAGGTGGCAAGCGTTGTCCGGAATTACTGGGTGTAAAGGGAGCGTAGGCGGGAAGATAAGTTGGACGTCTAATCTATCGGCTCAACCGATAGTCGC
ASV4290	706	0.533545	TRUE	TRUE	USA (Urban)	d__Bacteria	Firmicutes	NA	NA	NA	Human (USA/Malawi/Venezuela)	TACGTAGGGGGCGAGCGTTGTCCGGAATTACTGGGCGTAAAGGGTGCGTAGGCGGCCCTGCAGGTCAGATGTGAAATACCCGTGCTTAACATGGGGGCTG
ASV4290	624	-0.533387	TRUE	TRUE	USA (Urban)	d__Bacteria	Firmicutes	NA	NA	NA	Human (USA/Malawi/Venezuela)	TACGTAGGGGGCGAGCGTTGTCCGGAATTACTGGGCGTAAAGGGTGCGTAGGCGGCCCTGCAGGTCAGATGTGAAATACCCGTGCTTAACATGGGGGCTG
ASV42956	638	1.55649	TRUE	TRUE	USA (Urban)	d__Bacteria	Firmicutes	Oscillospirales	Oscillospiraceae	UCG-002	Human (USA/Malawi/Venezuela)	TACGTAGGTGGCAAGCGTTGTCCGGATTTACTGGGTGTAAAGGGCGTGTAGCCGGGAAGGCAAGTCAGATGTGAAATCCACGGGCTTAACTCGTGAACTG
ASV42977	720	0.0796773	TRUE	TRUE	Venezuela (Rural)	d__Bacteria	Firmicutes	Peptostreptococcales-Tissierellales	Anaerovoracaceae	Family_XIII_AD3011_group	Human (USA/Malawi/Venezuela)	TACGTAGGGGGCGAGCGTTATCCGGAATTATTGGGCGTAAAGAGTGCGTAGGTGGTAACTTAAGCGCGGGGTTTAAGGCAATGGCTTAACCATTGTTCGC
ASV42977	772	-0.0905409	TRUE	TRUE	Malawi (Rural)	d__Bacteria	Firmicutes	Peptostreptococcales-Tissierellales	Anaerovoracaceae	Family_XIII_AD3011_group	Human (USA/Malawi/Venezuela)	TACGTAGGGGGCGAGCGTTATCCGGAATTATTGGGCGTAAAGAGTGCGTAGGTGGTAACTTAAGCGCGGGGTTTAAGGCAATGGCTTAACCATTGTTCGC
ASV430	541	0.675697	TRUE	FALSE	Venezuela (Rural)	d__Bacteria	Firmicutes	Peptococcales	Peptococcaceae	uncultured	Human (USA/Malawi/Venezuela)	TACGTAGGGAGCAAGCGTTGTCCGGAATTACTGGGCGTAAAGGGCGCGTAGGTGGACATTTAAGTCAGATGTGAAAACTCTGGGCTCAACTTGGAGATTG
ASV430	707	-1.0437	TRUE	TRUE	Malawi (Rural)	d__Bacteria	Firmicutes	Peptococcales	Peptococcaceae	uncultured	Human (USA/Malawi/Venezuela)	TACGTAGGGAGCAAGCGTTGTCCGGAATTACTGGGCGTAAAGGGCGCGTAGGTGGACATTTAAGTCAGATGTGAAAACTCTGGGCTCAACTTGGAGATTG
ASV43060	490	-0.397036	TRUE	FALSE	Malawi (Rural)	d__Bacteria	Firmicutes	NA	NA	NA	Human (USA/Malawi/Venezuela)	TACGTAGGGAGCGAGCGTTGTCCGGAATTACTGGGTGTAAAGGGTGCGTAGGCGGGTATGCAAGTCACATGTGAAATACCGGGGCTCAACTCCGGGGCTG
ASV4307	750	1.12053	TRUE	TRUE	USA (Urban)	d__Bacteria	Firmicutes	Oscillospirales	UCG-010	UCG-010	Human (USA/Malawi/Venezuela)	TACGTAGGTGGCGAGCGTTATCCGGAATTATTGGGTGTAAAGGGTGCGTAGGCGGGTCGTAAAGTCAGATGTGAAATGCGGAGGCTCAACCTCCGAACTG
ASV4307	747	-0.955225	TRUE	TRUE	USA (Urban)	d__Bacteria	Firmicutes	Oscillospirales	UCG-010	UCG-010	Human (USA/Malawi/Venezuela)	TACGTAGGTGGCGAGCGTTATCCGGAATTATTGGGTGTAAAGGGTGCGTAGGCGGGTCGTAAAGTCAGATGTGAAATGCGGAGGCTCAACCTCCGAACTG
ASV43085	790	1.45505	TRUE	TRUE	USA (Urban)	d__Bacteria	Firmicutes	Lactobacillales	Leuconostocaceae	Leuconostoc	Human (USA/Malawi/Venezuela)	TACGTATGTCCCGAGCGTTATCCGGATTTATTGGGCGTAAAGCGAGCGCAGACGGTTGATTAAGTCTGATGTGAAAGCCCGGAGCTCAACTCCGGAATGG
ASV43085	768	-1.1431	TRUE	TRUE	USA (Urban)	d__Bacteria	Firmicutes	Lactobacillales	Leuconostocaceae	Leuconostoc	Human (USA/Malawi/Venezuela)	TACGTATGTCCCGAGCGTTATCCGGATTTATTGGGCGTAAAGCGAGCGCAGACGGTTGATTAAGTCTGATGTGAAAGCCCGGAGCTCAACTCCGGAATGG
ASV43199	818	0.254943	TRUE	TRUE	USA (Urban)	d__Bacteria	Firmicutes	Acholeplasmatales	Acholeplasmataceae	Anaeroplasma	Human (USA/Malawi/Venezuela)	TACGTAGGGGGCAAGCGTTATCCGGAATTATTGGGCGTAAAGGGTGCGTAGGCGGGTTATCAAGTCTTTGGTTAAAATGCGGTGCTCAACGCCGTAGTGC
ASV43214	714	0.865587	TRUE	TRUE	Venezuela (Rural)	d__Bacteria	Firmicutes	Oscillospirales	Oscillospiraceae	UCG-003	Human (USA/Malawi/Venezuela)	TACGTAGGTGGCAAGCGTTGTCCGGATTTACTGGGTGTAAAGGGCGTGCAGCCGGGCATGCAAGTCAGATGTGAAATCTCAGGGCTTAACCCTGAAACTG
ASV43214	732	-0.810531	TRUE	TRUE	Malawi (Rural)	d__Bacteria	Firmicutes	Oscillospirales	Oscillospiraceae	UCG-003	Human (USA/Malawi/Venezuela)	TACGTAGGTGGCAAGCGTTGTCCGGATTTACTGGGTGTAAAGGGCGTGCAGCCGGGCATGCAAGTCAGATGTGAAATCTCAGGGCTTAACCCTGAAACTG
ASV4323	741	0.327809	TRUE	TRUE	USA (Urban)	d__Bacteria	Firmicutes	Peptostreptococcales-Tissierellales	Anaerovoracaceae	S5-A14a	Human (USA/Malawi/Venezuela)	TACGTATGGGGCAAGCGTTATCCGGAATTATTGGGCGTAAAGAGTGCGTAGGTGGTGGCTTAAGCGCAGGGTTTAAGGCAATGGCTTAACTATTGTTCGC
ASV43236	798	0.0766863	TRUE	TRUE	USA (Urban)	d__Bacteria	Firmicutes	Lachnospirales	Lachnospiraceae	Coprococcus	Human (USA/Malawi/Venezuela)	TACGTAGGGGGCAAGCGTTATCCGGATTTACTGGGTGTAAAGGGTGCGTAGGTGGTATGGTAAGTCAGAAGTGAAAACCCGGGGCTCAACTCCGCGGATT
ASV43245	464	-0.00145634	TRUE	FALSE	USA (Urban)	d__Bacteria	Firmicutes	Oscillospirales	Oscillospiraceae	Oscillospira	Human (USA/Malawi/Venezuela)	TACGTAGGTGGCAAGCGTTGTCCGGATTTACTGGGTGTAAAGGGCGTGCAGCCGGGCTGATAAGTCAGATGTGAAATCTGGAGGCTCAACCTCCAAACTG
ASV43394	499	0.132092	TRUE	FALSE	USA (Urban)	d__Bacteria	Firmicutes	Lachnospirales	Lachnospiraceae	Eisenbergiella	Human (USA/Malawi/Venezuela)	TACGTAGGGGGCAAGCGTTATCCGGATTTACTGGGTGTAAAGGGAGCGTAGACGGCATGACAAGCCAGATGTGAAAACCCAGGGCTCAACCCTGGGACTG
ASV43396	745	0.398692	TRUE	TRUE	USA (Urban)	d__Bacteria	Firmicutes	Oscillospirales	Oscillospiraceae	NA	Human (USA/Malawi/Venezuela)	TACGTAGGTGGCAAGCGTTGTCCGGATTTACTGGGTGTAAAGGGCGCGTAGGCGGGATGGCAAGTCAGATGTGAAATCCATGGGCTCAACCCATGAACTG
ASV43396	765	0.202182	TRUE	TRUE	Venezuela (Rural)	d__Bacteria	Firmicutes	Oscillospirales	Oscillospiraceae	NA	Human (USA/Malawi/Venezuela)	TACGTAGGTGGCAAGCGTTGTCCGGATTTACTGGGTGTAAAGGGCGCGTAGGCGGGATGGCAAGTCAGATGTGAAATCCATGGGCTCAACCCATGAACTG
ASV43460	612	0.47775	TRUE	FALSE	USA (Urban)	d__Bacteria	Bacteroidota	Bacteroidales	Tannerellaceae	Parabacteroides	Human (USA/Malawi/Venezuela)	TACGGAGGATCCGAGCGTTATCCGGATTTATTGGGTTTAAAGGGTGCGTAGGCGGCCCCTTAAGTCAGCGGTGAAAGTCTGTGGCTCAACCATAGAATTG
ASV43471	822	0.606557	TRUE	TRUE	Venezuela (Rural)	d__Bacteria	Firmicutes	Christensenellales	Christensenellaceae	Christensenellaceae_R-7_group	Human (USA/Malawi/Venezuela)	TACGTAGGGGGCGAGCGTTGTCCGGAATTATTGGGCGTAAAGGGCGCGTAGACGGCTGAGTAAGTTACTGGTGAAAGCCCAGCTTTTAAGGCTGGAATTG
ASV43471	810	0.521698	TRUE	TRUE	USA (Urban)	d__Bacteria	Firmicutes	Christensenellales	Christensenellaceae	Christensenellaceae_R-7_group	Human (USA/Malawi/Venezuela)	TACGTAGGGGGCGAGCGTTGTCCGGAATTATTGGGCGTAAAGGGCGCGTAGACGGCTGAGTAAGTTACTGGTGAAAGCCCAGCTTTTAAGGCTGGAATTG
ASV43502	683	-0.0113189	TRUE	TRUE	USA (Urban)	d__Bacteria	Firmicutes	Lachnospirales	Lachnospiraceae	NA	Human (USA/Malawi/Venezuela)	TACGTAGGGGGCAAGCGTTATCCGGATTTACTGGGTGTAAAGGGAGCGTAGACGGCATTGCAAGCCAGATGTGAAAGCCCGGGGCTCAACCCCGGGACTG
ASV43518	513	-0.416842	TRUE	FALSE	Malawi (Rural)	d__Bacteria	Firmicutes	Lachnospirales	Lachnospiraceae	NA	Human (USA/Malawi/Venezuela)	TACGTAGGGGGCAAGCGTTATCCGGATTTACTGGGTGTAAAGGGAGCGTAGGTGGCGATGCAAGCCAGAAGTGAAAACCCGGGGCTCAACCCCGTGGACT
ASV43534	501	-0.195853	TRUE	FALSE	Malawi (Rural)	d__Bacteria	Firmicutes	NA	NA	NA	Human (USA/Malawi/Venezuela)	TACGTAGGTGGCGAGCGTTGTCCGGAATTACTGGGTGTAAAGGGTGCGTAGGCGGCTTCTAAAGTCAGATGTGAAATACCGCAGCTCAACTGCGGGGCTG
ASV43537	513	0.716182	TRUE	FALSE	Venezuela (Rural)	d__Bacteria	Firmicutes	Christensenellales	Christensenellaceae	uncultured	Human (USA/Malawi/Venezuela)	TACGTAGGGAGCGAGCGTTGTCCGGAATTACTGGGCGTAAAGGGTGCGTAGGCGGTATTTTAAGTCGCATGTGAAATACTCGGGCTTAACCCGGGGGCTG
ASV43537	602	-0.725054	TRUE	FALSE	Malawi (Rural)	d__Bacteria	Firmicutes	Christensenellales	Christensenellaceae	uncultured	Human (USA/Malawi/Venezuela)	TACGTAGGGAGCGAGCGTTGTCCGGAATTACTGGGCGTAAAGGGTGCGTAGGCGGTATTTTAAGTCGCATGTGAAATACTCGGGCTTAACCCGGGGGCTG
ASV43551	504	-0.611038	TRUE	FALSE	Malawi (Rural)	d__Bacteria	Firmicutes	Christensenellales	Christensenellaceae	Christensenellaceae_R-7_group	Human (USA/Malawi/Venezuela)	TACGTAGGGAGCGAGCGTTGTCCGGAATTACTGGGCGTAAAGGGTGCGTAGGCGGTCCTGTAAGTTGGATGTGAAATACCCGGGCTCAACCTGGGGGGTG
ASV4367	742	0.672113	TRUE	TRUE	USA (Urban)	d__Bacteria	Actinobacteriota	Bifidobacteriales	Bifidobacteriaceae	Bifidobacterium	Human (USA/Malawi/Venezuela)	TACGTAGGGTGCAAGCGTTATCCGGAATTATTGGGCGTAAAGAGCTCGTAGGCGGTTCGTCGCGTCCGGTGTGAAAGTCCATCGCTTAACGGTGGATCTG
ASV4374	778	-0.84684	TRUE	TRUE	USA (Urban)	d__Bacteria	Firmicutes	Oscillospirales	UCG-010	UCG-010	Human (USA/Malawi/Venezuela)	TACGTAGGTGGCAAGCGTTATCCGGAATTATTGGGTGTAAAGGGTGCGTAGGCGGGATGTAAAGTCAGATGTGAAATACCGCAGCTTAACTGCGGAGCTG
ASV4374	799	1.36212	TRUE	TRUE	USA (Urban)	d__Bacteria	Firmicutes	Oscillospirales	UCG-010	UCG-010	Human (USA/Malawi/Venezuela)	TACGTAGGTGGCAAGCGTTATCCGGAATTATTGGGTGTAAAGGGTGCGTAGGCGGGATGTAAAGTCAGATGTGAAATACCGCAGCTTAACTGCGGAGCTG
ASV43764	710	0.880247	TRUE	TRUE	Venezuela (Rural)	d__Bacteria	Firmicutes	Clostridia_UCG-014	Clostridia_UCG-014	Clostridia_UCG-014	Human (USA/Malawi/Venezuela)	TACGTAGGGAGCGAGCGTTATCCGGAATTATTGGGTGTAAAGGGTGCGTAGACGGGAAGATAAGTTAGTTGTGAAATCCCTCGGCTTAACTGAGGAACTG
ASV43764	748	-0.365066	TRUE	TRUE	Malawi (Rural)	d__Bacteria	Firmicutes	Clostridia_UCG-014	Clostridia_UCG-014	Clostridia_UCG-014	Human (USA/Malawi/Venezuela)	TACGTAGGGAGCGAGCGTTATCCGGAATTATTGGGTGTAAAGGGTGCGTAGACGGGAAGATAAGTTAGTTGTGAAATCCCTCGGCTTAACTGAGGAACTG
ASV43771	828	-1.57274	TRUE	TRUE	Malawi (Rural)	d__Bacteria	Firmicutes	Acidaminococcales	Acidaminococcaceae	Phascolarctobacterium	Human (USA/Malawi/Venezuela)	TACGTAGGTGGCGAGCGTTGTCCGGAATTATTGGGCGTAAAGAGCATGTAGGCGGTTTTTTAAGTCTGGAGTGAAAATGCGGGGCTCAACCCCGTATGGC
ASV43771	832	1.86249	TRUE	TRUE	Venezuela (Rural)	d__Bacteria	Firmicutes	Acidaminococcales	Acidaminococcaceae	Phascolarctobacterium	Human (USA/Malawi/Venezuela)	TACGTAGGTGGCGAGCGTTGTCCGGAATTATTGGGCGTAAAGAGCATGTAGGCGGTTTTTTAAGTCTGGAGTGAAAATGCGGGGCTCAACCCCGTATGGC
ASV438	513	-0.151913	TRUE	FALSE	Malawi (Rural)	d__Bacteria	Actinobacteriota	Actinomycetales	Actinomycetaceae	Mobiluncus	Human (USA/Malawi/Venezuela)	TACGTAGGGCGCGAGCGTTGTCCGGATTTATTGGGCGTAAAGAGCTCGTAGGTGGTTCGTCGCGTCTGTCGTGAAAGCCAGCAGCTTAACTGTTGGTCTG
ASV4382	754	-0.294946	TRUE	TRUE	USA (Urban)	d__Bacteria	Firmicutes	RF39	RF39	RF39	Human (USA/Malawi/Venezuela)	TACGTAGGGAGCGAGCGTTATCCGGATTTATTGGGTGTAAAGCGTGTGTAGGCGGTTACTTAAGTCTGTGGTCTAAGCCTGGAGCTCAACTCCAGTTCGC
ASV4382	782	0.461834	TRUE	TRUE	USA (Urban)	d__Bacteria	Firmicutes	RF39	RF39	RF39	Human (USA/Malawi/Venezuela)	TACGTAGGGAGCGAGCGTTATCCGGATTTATTGGGTGTAAAGCGTGTGTAGGCGGTTACTTAAGTCTGTGGTCTAAGCCTGGAGCTCAACTCCAGTTCGC
ASV43847	476	-0.223965	TRUE	FALSE	Malawi (Rural)	d__Bacteria	Firmicutes	Lachnospirales	Lachnospiraceae	NA	Human (USA/Malawi/Venezuela)	TACGTAGGGGGCAAGCGTTATCCGGATTTACTGGGTGTAAAGGGAGCGTAGGTGGTAGTGCAAGTCAGAAGTGAAAACCCAAGGCTTAACCATGGGATTG
ASV43891	563	-0.717836	TRUE	FALSE	Malawi (Rural)	d__Bacteria	Firmicutes	Oscillospirales	NA	NA	Human (USA/Malawi/Venezuela)	TACGTAGGGAGCGAGCGTTGTCCGGATTTACTGGGTGTAAAGGGCGTGTAGGCGGGACTGCAAGTCTGACGTGAAATCTGGTGGCTCAACCACCAAACTG
ASV43891	435	0.667219	TRUE	FALSE	Venezuela (Rural)	d__Bacteria	Firmicutes	Oscillospirales	NA	NA	Human (USA/Malawi/Venezuela)	TACGTAGGGAGCGAGCGTTGTCCGGATTTACTGGGTGTAAAGGGCGTGTAGGCGGGACTGCAAGTCTGACGTGAAATCTGGTGGCTCAACCACCAAACTG
ASV43946	760	0.344717	TRUE	TRUE	USA (Urban)	d__Bacteria	Bacteroidota	Bacteroidales	Tannerellaceae	NA	Human (USA/Malawi/Venezuela)	TACGGAGGATGCGAGCGTTATCCGGATTTATTGGGTTTAAAGGGTGCGTAGGTGGTTAATTAAGTCAGCGGTGAAAGTTTGTGGCTCAACCATAAAATTG
ASV43946	656	-0.323608	TRUE	TRUE	USA (Urban)	d__Bacteria	Bacteroidota	Bacteroidales	Tannerellaceae	NA	Human (USA/Malawi/Venezuela)	TACGGAGGATGCGAGCGTTATCCGGATTTATTGGGTTTAAAGGGTGCGTAGGTGGTTAATTAAGTCAGCGGTGAAAGTTTGTGGCTCAACCATAAAATTG
ASV43976	649	0.441312	TRUE	TRUE	Venezuela (Rural)	d__Bacteria	Actinobacteriota	Actinomycetales	Actinomycetaceae	Actinomyces	Human (USA/Malawi/Venezuela)	TACGTAGGGCGCGAGCGTTGTCCGGAATTATTGGGCGTAAAGAGCTCGTAGGCGGCTGGTCGCGTCTGTCGTGAAATCCTCTGGCTTAACTGGGGGCTTG
ASV43976	613	0.427321	TRUE	FALSE	USA (Urban)	d__Bacteria	Actinobacteriota	Actinomycetales	Actinomycetaceae	Actinomyces	Human (USA/Malawi/Venezuela)	TACGTAGGGCGCGAGCGTTGTCCGGAATTATTGGGCGTAAAGAGCTCGTAGGCGGCTGGTCGCGTCTGTCGTGAAATCCTCTGGCTTAACTGGGGGCTTG
ASV43991	434	0.228159	TRUE	FALSE	Venezuela (Rural)	d__Bacteria	Firmicutes	Christensenellales	Christensenellaceae	Christensenellaceae_R-7_group	Human (USA/Malawi/Venezuela)	TACGTAGGGGGCGAGCGTTGTCCGGAATTACTGGGCGTAAAGGGTGCGTAGGCGGTTAGATAAGTCGGATGTGGAATACCCGGGCTTAACCCGGGGGTGT
ASV43999	548	-0.341382	TRUE	FALSE	Malawi (Rural)	d__Bacteria	Firmicutes	Clostridia_vadinBB60_group	Clostridia_vadinBB60_group	Clostridia_vadinBB60_group	Human (USA/Malawi/Venezuela)	TACGTAGGATGCAAGCGTTATCCGGAATGACTGGGCGTAAAGGGTGCGTAGGTGGTTTGTCAAGTTGGCAGCGTAATTCCGTGGCTTAACCGCGGAACTA
ASV44019	502	-0.167006	TRUE	FALSE	Malawi (Rural)	d__Bacteria	Firmicutes	Staphylococcales	Gemellaceae	Gemella	Human (USA/Malawi/Venezuela)	TACGTAGGTGGCAAGCGTTGTCCGGAATTATTGGGCGTAAAGCGCGCGCAGGTGGTTTAATAAGTCTGATGTGAAAGCCCACGGCTCAACCGTGGAGGGT
ASV44047	649	-1.61022	TRUE	TRUE	Malawi (Rural)	d__Bacteria	Actinobacteriota	Actinomycetales	Actinomycetaceae	Actinomyces	Human (USA/Malawi/Venezuela)	TACGTAGGGTGCGAGCGTTGTCCGGAATTATTGGGCGTAAAGGGCTTGTAGGCGGTTTGTCGCGTCTGCCGTGAAATCCTCTGGCTTAACTGGGGGCGTG
ASV44047	604	1.60009	TRUE	TRUE	Venezuela (Rural)	d__Bacteria	Actinobacteriota	Actinomycetales	Actinomycetaceae	Actinomyces	Human (USA/Malawi/Venezuela)	TACGTAGGGTGCGAGCGTTGTCCGGAATTATTGGGCGTAAAGGGCTTGTAGGCGGTTTGTCGCGTCTGCCGTGAAATCCTCTGGCTTAACTGGGGGCGTG
ASV4408	516	0.207005	TRUE	FALSE	Venezuela (Rural)	d__Bacteria	Firmicutes	Oscillospirales	Ruminococcaceae	NA	Human (USA/Malawi/Venezuela)	TACGTAGGTGGCAAGCGTTGTCCGGAATTACTGGGTGTAAAGGGAGCGTAGGCGGGGCGGCAAGCAAAATGTGAAACTGATCGGCTCAACCGGTCATTGC
ASV4408	622	-0.311951	TRUE	TRUE	Malawi (Rural)	d__Bacteria	Firmicutes	Oscillospirales	Ruminococcaceae	NA	Human (USA/Malawi/Venezuela)	TACGTAGGTGGCAAGCGTTGTCCGGAATTACTGGGTGTAAAGGGAGCGTAGGCGGGGCGGCAAGCAAAATGTGAAACTGATCGGCTCAACCGGTCATTGC
ASV44129	483	-0.377511	TRUE	FALSE	Malawi (Rural)	d__Bacteria	Firmicutes	Oscillospirales	Butyricicoccaceae	Butyricicoccus	Human (USA/Malawi/Venezuela)	TACGTAGGGAGCAAGCGTTATCCGGATTTACTGGGTGTAAAGGGCGAGTAGGCGGGCTGGCAAGTTGGGAGTGAAATCCCGGGGCTTAACCCCGGAACTG
ASV44168	790	1.46573	TRUE	TRUE	USA (Urban)	d__Bacteria	Firmicutes	Oscillospirales	Ruminococcaceae	NA	Human (USA/Malawi/Venezuela)	TACGTAGGGAGCAAGCGTTGTCCGGAATTACTGGGTGTAAAGGGTGCGTAGGCGGCCCTGCAAGTCAGGCGTGAAAACCAGAGGCTCAACCTCTGGACTG
ASV44207	469	0.0453707	TRUE	FALSE	USA (Urban)	d__Bacteria	Firmicutes	Erysipelotrichales	Erysipelotrichaceae	uncultured	Human (USA/Malawi/Venezuela)	TACGTAGGTGGCGAGCGTTATCCGGAATCATTGGGCGTAAAGGGTGCGTAGGTGGCACGATAAGTCTGTAGTAAAAGGCAGCGGCTCAACCGCTGTTGGC
ASV44236	517	-1.21432	TRUE	FALSE	USA (Urban)	d__Bacteria	Firmicutes	NA	NA	NA	Human (USA/Malawi/Venezuela)	TACGTAGGGGGCAAGCGTTGTCCGGAATTATTGGGCGTAAAGGGTGCGTAGGCGGCCGATCAAGTCAGGTGTGAAAGACCCGTGCTTAACATGGGGGTTG
ASV44236	808	-0.137345	TRUE	TRUE	Malawi (Rural)	d__Bacteria	Firmicutes	NA	NA	NA	Human (USA/Malawi/Venezuela)	TACGTAGGGGGCAAGCGTTGTCCGGAATTATTGGGCGTAAAGGGTGCGTAGGCGGCCGATCAAGTCAGGTGTGAAAGACCCGTGCTTAACATGGGGGTTG
ASV44325	504	-0.173049	TRUE	FALSE	Malawi (Rural)	d__Bacteria	Firmicutes	Oscillospirales	Ruminococcaceae	Incertae_Sedis	Human (USA/Malawi/Venezuela)	TACGTAGGGAGCGAGCGTTGTCCGGAATTACTGGGTGTAAAGGGTGCGTAGGCGGATGCGCAAGTCAGTAGTGAAATGCATGGGCTTAACCCATGACGTG
ASV44507	785	0.425925	TRUE	TRUE	USA (Urban)	d__Bacteria	Firmicutes	Oscillospirales	UCG-010	UCG-010	Human (USA/Malawi/Venezuela)	TACGTAGGTGGCAAGCGTTATCCGGATTTACTGGGTGTAAAGGGTGTGTAGGCGGGAAGCCAAGTCAGATGTGAAAATCATGGGCTCAACTCATGACTTG
ASV44507	733	-0.479144	TRUE	TRUE	USA (Urban)	d__Bacteria	Firmicutes	Oscillospirales	UCG-010	UCG-010	Human (USA/Malawi/Venezuela)	TACGTAGGTGGCAAGCGTTATCCGGATTTACTGGGTGTAAAGGGTGTGTAGGCGGGAAGCCAAGTCAGATGTGAAAATCATGGGCTCAACTCATGACTTG
ASV4453	524	0.0468666	TRUE	FALSE	Venezuela (Rural)	d__Bacteria	Bacteroidota	Bacteroidales	Prevotellaceae	Prevotella	Human (USA/Malawi/Venezuela)	TACGGAAGGTTCGGGCGTTATCCGGATTTATTGGGTTTAAAGGGAGCGTAGGCCGTTTGGTAAGCGTGTTGTGAAATGTAGGAGCTCAACTTCTAGATTG
ASV4453	565	-0.314199	TRUE	FALSE	Malawi (Rural)	d__Bacteria	Bacteroidota	Bacteroidales	Prevotellaceae	Prevotella	Human (USA/Malawi/Venezuela)	TACGGAAGGTTCGGGCGTTATCCGGATTTATTGGGTTTAAAGGGAGCGTAGGCCGTTTGGTAAGCGTGTTGTGAAATGTAGGAGCTCAACTTCTAGATTG
ASV44773	519	-0.460359	TRUE	FALSE	Malawi (Rural)	d__Bacteria	Firmicutes	Veillonellales-Selenomonadales	Veillonellaceae	Dialister	Human (USA/Malawi/Venezuela)	TACGTAGGTGGCAAGCGTTGTCCGGAATTATTGGGCGTAAAGCGCGCGCAGGCGGCTTCCTAAGTCCATCTTAAAAGTGCGGGGCTTAACCCCGTGATGG
ASV44826	717	-0.419343	TRUE	TRUE	Malawi (Rural)	d__Bacteria	Firmicutes	Lachnospirales	Lachnospiraceae	Blautia	Human (USA/Malawi/Venezuela)	TACGTAGGGGGCAAGCGTTATCCGGATTTACTGGGTGTAAAGGGAGCGTAGACGGATTAGCAAGTCTGATGTGAAAGGCAGGGGCTCAACCCCTGGACTG
ASV44826	697	0.190518	TRUE	TRUE	Venezuela (Rural)	d__Bacteria	Firmicutes	Lachnospirales	Lachnospiraceae	Blautia	Human (USA/Malawi/Venezuela)	TACGTAGGGGGCAAGCGTTATCCGGATTTACTGGGTGTAAAGGGAGCGTAGACGGATTAGCAAGTCTGATGTGAAAGGCAGGGGCTCAACCCCTGGACTG
ASV4483	729	0.0333118	TRUE	TRUE	Venezuela (Rural)	d__Bacteria	Fusobacteriota	Fusobacteriales	Fusobacteriaceae	Cetobacterium	Human (USA/Malawi/Venezuela)	TACGTATGTCGCAAGCGTTATCCGGATTTATTGGGCGTAAAGCGCGTCTAGGCGGAAAAATAAGTCTGATGTTAAAATGCGGGGCTCAACTCCGTATTGC
ASV4483	619	-0.245298	TRUE	TRUE	Malawi (Rural)	d__Bacteria	Fusobacteriota	Fusobacteriales	Fusobacteriaceae	Cetobacterium	Human (USA/Malawi/Venezuela)	TACGTATGTCGCAAGCGTTATCCGGATTTATTGGGCGTAAAGCGCGTCTAGGCGGAAAAATAAGTCTGATGTTAAAATGCGGGGCTCAACTCCGTATTGC
ASV44835	501	-0.757207	TRUE	FALSE	Malawi (Rural)	d__Bacteria	Firmicutes	Oscillospirales	Ruminococcaceae	NA	Human (USA/Malawi/Venezuela)	TACGTAGGGAGCGAGCGTTGTCCGGAATTACTGGGTGTAAAGGGAGCGTAGGCGGGAAGACAAGTTGGATGTTTAAACTATCGGCTCAACTGGTAATTGC
ASV44866	444	0.58781	TRUE	FALSE	Venezuela (Rural)	d__Bacteria	Verrucomicrobiota	Verrucomicrobiales	Akkermansiaceae	Akkermansia	Human (USA/Malawi/Venezuela)	TACAGAGGTCTCAAGCGTTGTTCGGAATCACTGGGCGTAAAGCGTGCGTAGGCTGTTTCGTAAGTCGTGTGTAAAAGGCGCGGGCTCAACCCGCGGACGG
ASV44866	540	-0.7232	TRUE	FALSE	Malawi (Rural)	d__Bacteria	Verrucomicrobiota	Verrucomicrobiales	Akkermansiaceae	Akkermansia	Human (USA/Malawi/Venezuela)	TACAGAGGTCTCAAGCGTTGTTCGGAATCACTGGGCGTAAAGCGTGCGTAGGCTGTTTCGTAAGTCGTGTGTAAAAGGCGCGGGCTCAACCCGCGGACGG
ASV44945	482	-0.0931382	TRUE	FALSE	Malawi (Rural)	d__Bacteria	Firmicutes	Oscillospirales	UCG-010	UCG-010	Human (USA/Malawi/Venezuela)	TACGTAGGTGGCAAGCGTTATCCGGAATTACTGGGTGTAAAGGGTGTGTAGGCGGGTTTGCAAGTCAGATGTGAAAATTATGGGCTCAACCCATAACCTG
ASV4497	519	-0.296038	TRUE	FALSE	Malawi (Rural)	d__Bacteria	Firmicutes	Lachnospirales	Lachnospiraceae	NA	Human (USA/Malawi/Venezuela)	TACGTAGGGGGCAAGCGTTATCCGGAATTACTGGGTGTAAAGGGAGAGTAGGCGGCATGGTAAGTAAGATGTGAAAGCCCCGGGCTTAACCTGGGGATTG
ASV4497	443	0.0455512	TRUE	FALSE	Venezuela (Rural)	d__Bacteria	Firmicutes	Lachnospirales	Lachnospiraceae	NA	Human (USA/Malawi/Venezuela)	TACGTAGGGGGCAAGCGTTATCCGGAATTACTGGGTGTAAAGGGAGAGTAGGCGGCATGGTAAGTAAGATGTGAAAGCCCCGGGCTTAACCTGGGGATTG
ASV44986	758	-0.497922	TRUE	TRUE	USA (Urban)	d__Bacteria	Firmicutes	Peptostreptococcales-Tissierellales	Anaerovoracaceae	Family_XIII_AD3011_group	Human (USA/Malawi/Venezuela)	TACGTAGGGGGCAAGCGTTATCCGGAATTATTGGGCGTAAAGAGTGCGTAGGTGGTTACCTAAGCAGGGGGTGAAAGGCTATGGCTTAACCATAGTCAGC
ASV44986	790	0.789966	TRUE	TRUE	USA (Urban)	d__Bacteria	Firmicutes	Peptostreptococcales-Tissierellales	Anaerovoracaceae	Family_XIII_AD3011_group	Human (USA/Malawi/Venezuela)	TACGTAGGGGGCAAGCGTTATCCGGAATTATTGGGCGTAAAGAGTGCGTAGGTGGTTACCTAAGCAGGGGGTGAAAGGCTATGGCTTAACCATAGTCAGC
ASV45019	735	-0.46282	TRUE	TRUE	Malawi (Rural)	d__Bacteria	Firmicutes	Peptostreptococcales-Tissierellales	Anaerovoracaceae	Family_XIII_AD3011_group	Human (USA/Malawi/Venezuela)	TACGTAGGGGGCAAGCGTTATCCGGAATTATTGGGCGTAAAGAGTACGTAGGTGGTTACCTAAGCAAGGGGTTTAAGGCAATGGCTTAACTATTGTTCGC
ASV45019	684	0.451468	TRUE	TRUE	Venezuela (Rural)	d__Bacteria	Firmicutes	Peptostreptococcales-Tissierellales	Anaerovoracaceae	Family_XIII_AD3011_group	Human (USA/Malawi/Venezuela)	TACGTAGGGGGCAAGCGTTATCCGGAATTATTGGGCGTAAAGAGTACGTAGGTGGTTACCTAAGCAAGGGGTTTAAGGCAATGGCTTAACTATTGTTCGC
ASV45153	487	-0.207886	TRUE	FALSE	Malawi (Rural)	d__Bacteria	Firmicutes	Oscillospirales	Ruminococcaceae	NA	Human (USA/Malawi/Venezuela)	TACGTAGGGAGCGAGCGTTGTCCGGAATTACTGGGTGTAAAGGGTGCGTAGGCGGGCAGTCAAGTCAGACGTGAAATCTATGGGCTTAACCCATAGTCTG
ASV45154	766	-2.07363	TRUE	TRUE	USA (Urban)	d__Bacteria	Firmicutes	Lachnospirales	Lachnospiraceae	Fusicatenibacter	Human (USA/Malawi/Venezuela)	TACGTAGGGGGCAAGCGTTATCCGGATTTACTGGGTGTAAAGGGAGCGTAGACGGCAAGGCAAGTCTGATGTGAAAACCCAGGGCTTAACCCTGGGACTG
ASV45154	800	1.79897	TRUE	TRUE	USA (Urban)	d__Bacteria	Firmicutes	Lachnospirales	Lachnospiraceae	Fusicatenibacter	Human (USA/Malawi/Venezuela)	TACGTAGGGGGCAAGCGTTATCCGGATTTACTGGGTGTAAAGGGAGCGTAGACGGCAAGGCAAGTCTGATGTGAAAACCCAGGGCTTAACCCTGGGACTG
ASV45156	516	-0.533547	TRUE	FALSE	Malawi (Rural)	d__Bacteria	Firmicutes	Christensenellales	Christensenellaceae	NA	Human (USA/Malawi/Venezuela)	TACGTAGGGAGCAAGCGTTGTCCGGAATTACTGGGCGTAAAGGGTGCGTAGGCGGTTTGATAAGTCAGATGTGAAATATTCGGGCTTAACCTGGAGGGTG
ASV45171	466	0.0598131	TRUE	FALSE	USA (Urban)	d__Bacteria	Proteobacteria	Burkholderiales	Sutterellaceae	Sutterella	Human (USA/Malawi/Venezuela)	TACGTAGGGTGCAAGCGTTAATCGGAATTACTGGGCGTAAAGCGTGCGCAGGCGGTTCTGTAAGATAGATGTGAAATCCCCGGGCTCAACCTGGGAATTG
ASV45179	621	-0.439864	TRUE	TRUE	USA (Urban)	d__Bacteria	Firmicutes	Christensenellales	Christensenellaceae	uncultured	Human (USA/Malawi/Venezuela)	TACGTAGGGAGCAAGCGTTGTCCGGAATTACTGGGCGTAAAGGGTGCGTAGGCGGTTTGATAAGTCAGATGTGAAATATCCGGGCTTAACCTGGAGGGTG
ASV45179	658	0.146034	TRUE	TRUE	USA (Urban)	d__Bacteria	Firmicutes	Christensenellales	Christensenellaceae	uncultured	Human (USA/Malawi/Venezuela)	TACGTAGGGAGCAAGCGTTGTCCGGAATTACTGGGCGTAAAGGGTGCGTAGGCGGTTTGATAAGTCAGATGTGAAATATCCGGGCTTAACCTGGAGGGTG
ASV45216	760	0.624473	TRUE	TRUE	USA (Urban)	d__Bacteria	Firmicutes	Lachnospirales	Lachnospiraceae	Blautia	Human (USA/Malawi/Venezuela)	TACGTAGGGGGCAAGCGTTATCCGGATTTACTGGGTGTAAAGGGAGCGTAGACGGAAGAGCAAGTCTGATGTGAAAGGCTGGGGCTTAACCCAGGACTGC
ASV45216	488	0.105024	TRUE	FALSE	Venezuela (Rural)	d__Bacteria	Firmicutes	Lachnospirales	Lachnospiraceae	Blautia	Human (USA/Malawi/Venezuela)	TACGTAGGGGGCAAGCGTTATCCGGATTTACTGGGTGTAAAGGGAGCGTAGACGGAAGAGCAAGTCTGATGTGAAAGGCTGGGGCTTAACCCAGGACTGC
ASV45291	751	-0.322159	TRUE	TRUE	Malawi (Rural)	d__Bacteria	Firmicutes	Oscillospirales	Oscillospirales	Hydrogenoanaerobacterium	Human (USA/Malawi/Venezuela)	TACGTAGGGAGCGAGCGTTGTCCGGAATTACTGGGTGTAAAGGGAGCGTAGGCGGGAGTGCAAGTTGAATGTTTAATCTATGGGCTCAACCCATATCAGC
ASV45291	498	-0.249453	TRUE	FALSE	USA (Urban)	d__Bacteria	Firmicutes	Oscillospirales	Oscillospirales	Hydrogenoanaerobacterium	Human (USA/Malawi/Venezuela)	TACGTAGGGAGCGAGCGTTGTCCGGAATTACTGGGTGTAAAGGGAGCGTAGGCGGGAGTGCAAGTTGAATGTTTAATCTATGGGCTCAACCCATATCAGC
ASV45313	669	-1.16379	TRUE	TRUE	Malawi (Rural)	d__Bacteria	Firmicutes	Oscillospirales	Ruminococcaceae	NA	Human (USA/Malawi/Venezuela)	TACGTAGGGAGCGAGCGTTGTCCGGATTTACTGGGTGTAAAGGGTGCGTAGGCGGCTAGACAAGTCAGGTGTGAAATACCGCAGCTCAACTGCGGGGCTG
ASV45323	498	0.0146306	TRUE	FALSE	USA (Urban)	d__Bacteria	Firmicutes	Oscillospirales	Ruminococcaceae	uncultured	Human (USA/Malawi/Venezuela)	TACGTAGGGAGCGAGCGTTGTCCGGAATTACTGGGTGTAAAGGGAGCGTAGGCGGGAAAGCAAGTTGGAAGTGAAATGCATGGGCTCAACCCATGAGCTG
ASV45353	768	-0.157325	TRUE	TRUE	Malawi (Rural)	d__Bacteria	Firmicutes	Clostridia_UCG-014	Clostridia_UCG-014	Clostridia_UCG-014	Human (USA/Malawi/Venezuela)	TACGTAGGGAGCAAGCGTTATCCGGATTTATTGGGTGTAAAGGGTGCGTAGACGGGAAAGCAAGTTAGTTGTGAAATCCCTCGGCTTAACTGAGGAACTG
ASV45353	730	0.664404	TRUE	TRUE	Venezuela (Rural)	d__Bacteria	Firmicutes	Clostridia_UCG-014	Clostridia_UCG-014	Clostridia_UCG-014	Human (USA/Malawi/Venezuela)	TACGTAGGGAGCAAGCGTTATCCGGATTTATTGGGTGTAAAGGGTGCGTAGACGGGAAAGCAAGTTAGTTGTGAAATCCCTCGGCTTAACTGAGGAACTG
ASV45357	539	-0.41888	TRUE	FALSE	Malawi (Rural)	d__Bacteria	Firmicutes	Christensenellales	Christensenellaceae	Christensenellaceae_R-7_group	Human (USA/Malawi/Venezuela)	TACGTAGGGGGCAAGCGTTGTCCGGAATGACTGGGCGTAAAGGGCGTGTAGGCGGCCGATTAAGTGTGGAGTGAAAGTCCACTTTTCAAGGGTGGAATTG
ASV45403	496	-0.492021	TRUE	FALSE	Malawi (Rural)	d__Bacteria	Firmicutes	Lachnospirales	Lachnospiraceae	Epulopiscium	Human (USA/Malawi/Venezuela)	TACGTAGGGGGCAAGCGTTATCCGGAATTACTGGGTGTAAAGGGTGCGTAGGCGGCGATTTAAGTCAGATGTGAAAACTCAGGGCTCAACCTTGAGACTG
ASV45408	516	-0.788693	TRUE	FALSE	Malawi (Rural)	d__Bacteria	Firmicutes	Oscillospirales	Ruminococcaceae	NA	Human (USA/Malawi/Venezuela)	TACGTAGGTGGCAAGCGTTGTCCGGAATTACTGGGTGTAAAGGGAGCGTAGGCGGGAAGGCAAGTCAAGTGTCAAATCTATCGGCTCAACTGATAGTCGC
ASV45448	581	0.370826	TRUE	FALSE	Venezuela (Rural)	d__Bacteria	Firmicutes	Eubacteriales	Anaerofustaceae	Anaerofustis	Human (USA/Malawi/Venezuela)	TACGTAGGGAGCAAGCGTTGTCCGGATTCACTGGGCGTAAAGAGCACGTAGGCGGTTAATTAAGTCAGGTGTGAAAGTTTTCGGCTCAACCGGAAAAGTG
ASV45448	689	-0.642606	TRUE	TRUE	Malawi (Rural)	d__Bacteria	Firmicutes	Eubacteriales	Anaerofustaceae	Anaerofustis	Human (USA/Malawi/Venezuela)	TACGTAGGGAGCAAGCGTTGTCCGGATTCACTGGGCGTAAAGAGCACGTAGGCGGTTAATTAAGTCAGGTGTGAAAGTTTTCGGCTCAACCGGAAAAGTG
ASV455	462	0.049819	TRUE	FALSE	USA (Urban)	d__Bacteria	Firmicutes	Clostridia_UCG-014	Clostridia_UCG-014	Clostridia_UCG-014	Human (USA/Malawi/Venezuela)	TACGTAGGGAGCGAGCGTTATCCGGAATTATTGGGTGTAAAGGGTGCGTAGACGGGAGAACAAGTTAGTTGTGAAATACCTCGGCTCAACTGAGGAACTG
ASV4551	727	-0.365318	TRUE	TRUE	USA (Urban)	d__Bacteria	Firmicutes	Lactobacillales	Lactobacillaceae	Lactobacillus	Human (USA/Malawi/Venezuela)	TACGTAGGTGGCAAGCGTTGTCCGGATTTATTGGGCGTAAAGCGAGCGCAGGCGGAATGATAAGTCTGATGTGAAAGCCCACGGCTCAACCGTGGAACTG
ASV4551	678	-0.238547	TRUE	TRUE	Malawi (Rural)	d__Bacteria	Firmicutes	Lactobacillales	Lactobacillaceae	Lactobacillus	Human (USA/Malawi/Venezuela)	TACGTAGGTGGCAAGCGTTGTCCGGATTTATTGGGCGTAAAGCGAGCGCAGGCGGAATGATAAGTCTGATGTGAAAGCCCACGGCTCAACCGTGGAACTG
ASV45533	529	-0.694343	TRUE	FALSE	Malawi (Rural)	d__Bacteria	Verrucomicrobiota	Verrucomicrobiales	Akkermansiaceae	Akkermansia	Human (USA/Malawi/Venezuela)	TACAGAGGTCTCAAGCGTTGTTCGGAATCACTGGGCGTAAAGCGTGCGTAGGCTGTTTCGTAAGTCGTGTGTGAAAGACGCGGGCTCAACCCGCGGACGG
ASV45591	774	-2.89201	TRUE	TRUE	Malawi (Rural)	d__Bacteria	Proteobacteria	Pasteurellales	Pasteurellaceae	Haemophilus	Human (USA/Malawi/Venezuela)	TACGGAGGGTGCGAGCGTTAATCGGAATAACTGGGCGTAAAGGGCACGCAGGCGGTGACTTAAGTGAGGTGTGAAAGCCCCGGGCTTAACCTGGGAATTG
ASV45591	707	0.840736	TRUE	TRUE	Venezuela (Rural)	d__Bacteria	Proteobacteria	Pasteurellales	Pasteurellaceae	Haemophilus	Human (USA/Malawi/Venezuela)	TACGGAGGGTGCGAGCGTTAATCGGAATAACTGGGCGTAAAGGGCACGCAGGCGGTGACTTAAGTGAGGTGTGAAAGCCCCGGGCTTAACCTGGGAATTG
ASV4560	805	-2.29452	TRUE	TRUE	USA (Urban)	d__Bacteria	Firmicutes	Lachnospirales	Lachnospiraceae	Roseburia	Human (USA/Malawi/Venezuela)	TACGTAGGGGGCAAGCGTTATCCGGATTTACTGGGTGTAAAGGGAGCGCAGGCGGCATGATAAGTCTGATGTGAAAACCCAAGGCTCAACCATGGGACTG
ASV4560	807	2.018	TRUE	TRUE	USA (Urban)	d__Bacteria	Firmicutes	Lachnospirales	Lachnospiraceae	Roseburia	Human (USA/Malawi/Venezuela)	TACGTAGGGGGCAAGCGTTATCCGGATTTACTGGGTGTAAAGGGAGCGCAGGCGGCATGATAAGTCTGATGTGAAAACCCAAGGCTCAACCATGGGACTG
ASV45651	453	0.0643448	TRUE	FALSE	USA (Urban)	d__Bacteria	Firmicutes	Erysipelotrichales	Erysipelotrichaceae	Holdemania	Human (USA/Malawi/Venezuela)	TACGTAGGTGGCGAGCGTTATCCGGAATTATTGGGCGTAAAGGGTGCGCAGGCGGTTTGAAAAGTTTAAGGTGAAAGCGTGGGGCTTAACCCCATACAGC
ASV45679	755	0.891169	TRUE	TRUE	USA (Urban)	d__Bacteria	Bacteroidota	Bacteroidales	Bacteroidaceae	Bacteroides	Human (USA/Malawi/Venezuela)	TACGGAGGATCCGAGCGTTATCCGGATTTATTGGGTTTAAAGGGAGCGTAGGCGGATTATTAAGTCAGTTGTGAAAGTTTGCGGCTCAACCGTAAAATTG
ASV45733	712	-0.0815877	TRUE	TRUE	Malawi (Rural)	d__Bacteria	Firmicutes	Lachnospirales	Lachnospiraceae	NA	Human (USA/Malawi/Venezuela)	TACGTAGGGGGCAAGCGTTATCCGGATTTACTGGGTGTAAAGGGAGCGTAGACGGTCAAGCAAGTCAGAAGTGAAAGGCTGGGGCTCAACCCCGGGACTG
ASV45739	797	0.903837	TRUE	TRUE	USA (Urban)	d__Bacteria	Firmicutes	Oscillospirales	Oscillospiraceae	NA	Human (USA/Malawi/Venezuela)	TACGTAGGTGGCAAGCGTTGTCCGGATTTACTGGGTGTAAAGGGCGTGTAGGCGGAGCTGCAAGTCAGATGTGAAATCTGGGGGCTCAACCCTCAAACTG
ASV45744	526	-0.0811624	TRUE	FALSE	Malawi (Rural)	d__Bacteria	Actinobacteriota	Coriobacteriales	Coriobacteriales_Incertae_Sedis	Raoultibacter	Human (USA/Malawi/Venezuela)	TACGTAGGGAGCAAGCGTTATCCGGATTTATTGGGCGTAAAGCGCGCGTAGGCGGCCTGTTAAGCGGAATCTCTAATCTGAGGGCTCAACCCCCAGCCGG
ASV45744	586	-0.272433	TRUE	FALSE	USA (Urban)	d__Bacteria	Actinobacteriota	Coriobacteriales	Coriobacteriales_Incertae_Sedis	Raoultibacter	Human (USA/Malawi/Venezuela)	TACGTAGGGAGCAAGCGTTATCCGGATTTATTGGGCGTAAAGCGCGCGTAGGCGGCCTGTTAAGCGGAATCTCTAATCTGAGGGCTCAACCCCCAGCCGG
ASV45902	484	-0.426943	TRUE	FALSE	Malawi (Rural)	d__Bacteria	Firmicutes	Lactobacillales	Lactobacillaceae	Lactobacillus	Human (USA/Malawi/Venezuela)	TACGTAGGTGGCAAGCGTTGTCCGGATTTATTGGGCGTAAAGCGAGTGCAGGCGGTTCAATAAGTCTGATGTGAAAGCCTTCGGCTCAACCGGAGAATTG
ASV4593	690	-0.288993	TRUE	TRUE	USA (Urban)	d__Bacteria	Firmicutes	Erysipelotrichales	Erysipelotrichaceae	Bulleidia	Human (USA/Malawi/Venezuela)	TACGTAGGTGGCGAGCGTTATCCGGAATTATTGGGCGTAAAGGGTGCGTAGGCGGTCTGTTAAGTTCATGGTCAAATTGTGGGGCTCAACCCCATCGCGC
ASV45982	827	0.769098	TRUE	TRUE	Venezuela (Rural)	d__Bacteria	Bacteroidota	Bacteroidales	Bacteroidaceae	Bacteroides	Human (USA/Malawi/Venezuela)	TACGGAGGATGCGAGCGTTATCCGGATTTATTGGGTTTAAAGGGAGCGCAGACGGGACTTTAAGTCAGCTGTGAAATTTTCCGGCTCAACCGGGAAACTG
ASV45982	806	-0.366246	TRUE	TRUE	Malawi (Rural)	d__Bacteria	Bacteroidota	Bacteroidales	Bacteroidaceae	Bacteroides	Human (USA/Malawi/Venezuela)	TACGGAGGATGCGAGCGTTATCCGGATTTATTGGGTTTAAAGGGAGCGCAGACGGGACTTTAAGTCAGCTGTGAAATTTTCCGGCTCAACCGGGAAACTG
ASV45997	531	-0.541475	TRUE	FALSE	Malawi (Rural)	Unassigned	NA	NA	NA	NA	Human (USA/Malawi/Venezuela)	TATCTGCCGGGGCATAACGATTGTGTCCATTGGGTAAAAAGGTTTGTTCTTTGTTTCGCAGTCGCCATAATATTGGCTCTCCGAAGCCCATAATATCTTT
ASV45997	429	0.536897	TRUE	FALSE	Venezuela (Rural)	Unassigned	NA	NA	NA	NA	Human (USA/Malawi/Venezuela)	TATCTGCCGGGGCATAACGATTGTGTCCATTGGGTAAAAAGGTTTGTTCTTTGTTTCGCAGTCGCCATAATATTGGCTCTCCGAAGCCCATAATATCTTT
ASV46003	490	-0.582817	TRUE	FALSE	Malawi (Rural)	d__Bacteria	Campilobacterota	Campylobacterales	Campylobacteraceae	Campylobacter	Human (USA/Malawi/Venezuela)	TACGGAGGGTGCAAGCGTTACTCGGAATCACTGGGCGTAAAGGGTGCGTAGGTGGATTATCAAGTCTCTTGTGAAATCTAATAGCTTAACTATTAAATTG
ASV461	769	-0.356072	TRUE	TRUE	USA (Urban)	d__Bacteria	Spirochaetota	Spirochaetales	Spirochaetaceae	Treponema	Human (USA/Malawi/Venezuela)	CACGTAAGGTGCGAGCGTTGTTCGGAATTATTGGGCGTAAAGGGCATGTAGGCGGAAATGCAAGCCTGGCGTGAAATCCCGGGGCTTAACTCCGGGACTG
ASV46320	781	1.00339	TRUE	TRUE	USA (Urban)	d__Bacteria	Firmicutes	Lachnospirales	Lachnospiraceae	Lachnospiraceae_UCG-008	Human (USA/Malawi/Venezuela)	TACGTAGGGGGCAAGCGTTATCCGGATTTACTGGGTGTAAAGGGAGCGTAGGTGGTATGGCAAGTCAGAGGTGAAAACCCAGGGCTTAACCTTGGGATTG
ASV46320	766	-0.77366	TRUE	TRUE	USA (Urban)	d__Bacteria	Firmicutes	Lachnospirales	Lachnospiraceae	Lachnospiraceae_UCG-008	Human (USA/Malawi/Venezuela)	TACGTAGGGGGCAAGCGTTATCCGGATTTACTGGGTGTAAAGGGAGCGTAGGTGGTATGGCAAGTCAGAGGTGAAAACCCAGGGCTTAACCTTGGGATTG
ASV46364	512	0.631841	TRUE	FALSE	Venezuela (Rural)	d__Bacteria	Firmicutes	Oscillospirales	NA	NA	Human (USA/Malawi/Venezuela)	TACGTAGGTTGCGAGCGTTGTCCGGATTTACTGGGTGTAAAGGGTGCGTAGGCGGGAACGCAAGTCAGATGTGAAAGACCACGGCTCAACCGTGGTACTG
ASV46364	660	-0.901273	TRUE	TRUE	Malawi (Rural)	d__Bacteria	Firmicutes	Oscillospirales	NA	NA	Human (USA/Malawi/Venezuela)	TACGTAGGTTGCGAGCGTTGTCCGGATTTACTGGGTGTAAAGGGTGCGTAGGCGGGAACGCAAGTCAGATGTGAAAGACCACGGCTCAACCGTGGTACTG
ASV46403	548	-0.863116	TRUE	FALSE	Malawi (Rural)	d__Bacteria	Bacteroidota	Bacteroidales	Prevotellaceae	Prevotella	Human (USA/Malawi/Venezuela)	TACGGAAGGTCCGGGCGTTATCCGGATTTATTGGGTTTAAAGGGAGCGTAGGCCGCCAGGTAAGCGTGTTGTGAAATGTACCGGCTCAACCGGTGAATTG
ASV46403	477	0.906678	TRUE	FALSE	Venezuela (Rural)	d__Bacteria	Bacteroidota	Bacteroidales	Prevotellaceae	Prevotella	Human (USA/Malawi/Venezuela)	TACGGAAGGTCCGGGCGTTATCCGGATTTATTGGGTTTAAAGGGAGCGTAGGCCGCCAGGTAAGCGTGTTGTGAAATGTACCGGCTCAACCGGTGAATTG
ASV46408	815	0.759293	TRUE	TRUE	USA (Urban)	d__Bacteria	Firmicutes	Oscillospirales	UCG-010	UCG-010	Human (USA/Malawi/Venezuela)	TACGTAGGTGGCGAGCGTTATCCGGATTTACTGGGTGTAAAGGGTGTGTAGGCGGGACTGCAAGTCGGATGTGAAAATCACAGGCTTAACCTGTGACCTG
ASV46408	782	-1.38933	TRUE	TRUE	USA (Urban)	d__Bacteria	Firmicutes	Oscillospirales	UCG-010	UCG-010	Human (USA/Malawi/Venezuela)	TACGTAGGTGGCGAGCGTTATCCGGATTTACTGGGTGTAAAGGGTGTGTAGGCGGGACTGCAAGTCGGATGTGAAAATCACAGGCTTAACCTGTGACCTG
ASV46485	752	0.370069	TRUE	TRUE	Venezuela (Rural)	d__Bacteria	Firmicutes	Clostridiales	Clostridiaceae	Sarcina	Human (USA/Malawi/Venezuela)	TACGTAGGTGGCAAGCGTTATCCGGATTTACTGGGCGTAAAGGGAGCGTAGGCGGATATTTAAGTGGGATGTGAAATACCCGAGCTTAACTTGGGAGCTG
ASV46485	872	-2.76865	TRUE	TRUE	Malawi (Rural)	d__Bacteria	Firmicutes	Clostridiales	Clostridiaceae	Sarcina	Human (USA/Malawi/Venezuela)	TACGTAGGTGGCAAGCGTTATCCGGATTTACTGGGCGTAAAGGGAGCGTAGGCGGATATTTAAGTGGGATGTGAAATACCCGAGCTTAACTTGGGAGCTG
ASV46511	503	-0.808536	TRUE	FALSE	Malawi (Rural)	d__Bacteria	Verrucomicrobiota	Verrucomicrobiales	Akkermansiaceae	Akkermansia	Human (USA/Malawi/Venezuela)	TACAGAGGTCTCAAGCGTTGTTCGGAATCACTGGGCGTAAAGCGTGCGTAGGCTGTTTCGTAAGTCGTGTGTGAAAGGCGCGAGCTCAACCCGCGGACGG
ASV46553	685	0.245421	TRUE	TRUE	Venezuela (Rural)	d__Bacteria	Firmicutes	Peptostreptococcales-Tissierellales	Anaerovoracaceae	Family_XIII_AD3011_group	Human (USA/Malawi/Venezuela)	TACGTAGGGGGCAAGCGTTATCCGGAATTATTGGGCGTAAAGAGTGCGTAGGTGGTTACCTAAGCAGGGGGTGAAAGGCACTGGCTTAACCAATGTCAGC
ASV46553	529	1.04523	TRUE	FALSE	USA (Urban)	d__Bacteria	Firmicutes	Peptostreptococcales-Tissierellales	Anaerovoracaceae	Family_XIII_AD3011_group	Human (USA/Malawi/Venezuela)	TACGTAGGGGGCAAGCGTTATCCGGAATTATTGGGCGTAAAGAGTGCGTAGGTGGTTACCTAAGCAGGGGGTGAAAGGCACTGGCTTAACCAATGTCAGC
ASV46582	466	0.0152357	TRUE	FALSE	Venezuela (Rural)	d__Bacteria	Firmicutes	Peptococcales	Peptococcaceae	Peptococcus	Human (USA/Malawi/Venezuela)	TACGTAGGGGGCAAGCGTTGTCCGGAATCACTGGGCGTAAAGGGCGCGTAGGCGGCAATATAAGTCAGATGTGAAAGGTGAGGGCTCAACCCTTAGACTG
ASV46582	624	-0.0749509	TRUE	TRUE	Malawi (Rural)	d__Bacteria	Firmicutes	Peptococcales	Peptococcaceae	Peptococcus	Human (USA/Malawi/Venezuela)	TACGTAGGGGGCAAGCGTTGTCCGGAATCACTGGGCGTAAAGGGCGCGTAGGCGGCAATATAAGTCAGATGTGAAAGGTGAGGGCTCAACCCTTAGACTG
ASV46668	532	-0.669395	TRUE	FALSE	Malawi (Rural)	d__Bacteria	Actinobacteriota	Coriobacteriales	Eggerthellaceae	Gordonibacter	Human (USA/Malawi/Venezuela)	TACGTAGGGGGCGAGCGTTATCCGGATTCATTGGGCGTAAAGCGCGCGTAGGCGGGCTTCTAAGCGGAACCTCTAACCCGAGGGCTCAACCCCCGGCCGG
ASV46668	431	0.663685	TRUE	FALSE	Venezuela (Rural)	d__Bacteria	Actinobacteriota	Coriobacteriales	Eggerthellaceae	Gordonibacter	Human (USA/Malawi/Venezuela)	TACGTAGGGGGCGAGCGTTATCCGGATTCATTGGGCGTAAAGCGCGCGTAGGCGGGCTTCTAAGCGGAACCTCTAACCCGAGGGCTCAACCCCCGGCCGG
ASV46723	832	-1.13756	TRUE	TRUE	Malawi (Rural)	d__Bacteria	Firmicutes	Oscillospirales	Ruminococcaceae	Fournierella	Human (USA/Malawi/Venezuela)	AACGTAGGTGGCAAGCGTTGTCCGGAATTACTGGGTGTAAAGGGAGCGCAGGCGGAAGGACAAGTTGGAAGTGAAACCCACGGGCTCAACCCGTGAACTG
ASV46777	546	0.0158835	TRUE	FALSE	USA (Urban)	d__Bacteria	Firmicutes	Peptostreptococcales-Tissierellales	Peptostreptococcales-Tissierellales	Parvimonas	Human (USA/Malawi/Venezuela)	TACGTATGGGGCGAGCGTTGTCCGGAATTATTGGGCGTAAAGGGTACGTAGGCGGTTTTTTAAGTCAGGTGTGAAAGCGTGAGGCTTAACCTCATTAAGC
ASV4678	769	-1.05883	TRUE	TRUE	Malawi (Rural)	d__Bacteria	Firmicutes	Clostridiales	Clostridiaceae	Sarcina	Human (USA/Malawi/Venezuela)	TACGTAGGTGGCAAGCGTTATCCGGATTTACTGGGCGTAAAGGGAGCGTAGGCGGATATTTAAGTGGGATGTGAAATACCTGAGCTTAACTTGGGAGCTG
ASV46805	811	1.09544	TRUE	TRUE	USA (Urban)	d__Bacteria	Firmicutes	Lactobacillales	Streptococcaceae	Streptococcus	Human (USA/Malawi/Venezuela)	TACGTAGGTCCCGAGCGTTATCCGGATTTATTGGGCGTAAAGCGAGCGCAGGCGGTTAGATAAGTCTGAAGTTAAAGGCTGTGGCTTAACCATAGTACGC
ASV46805	775	-1.71482	TRUE	TRUE	USA (Urban)	d__Bacteria	Firmicutes	Lactobacillales	Streptococcaceae	Streptococcus	Human (USA/Malawi/Venezuela)	TACGTAGGTCCCGAGCGTTATCCGGATTTATTGGGCGTAAAGCGAGCGCAGGCGGTTAGATAAGTCTGAAGTTAAAGGCTGTGGCTTAACCATAGTACGC
ASV46874	714	0.785475	TRUE	TRUE	Venezuela (Rural)	d__Bacteria	Firmicutes	Christensenellales	Christensenellaceae	Christensenellaceae_R-7_group	Human (USA/Malawi/Venezuela)	TACGTAGGGGGCGAGCGTTGTCCGGAATTACTGGGCGTAAAGGGAGCGTAGGCGGTCGATTAAGTTAGATGTGAAACCCCCGGGCTTAACTTGGGGACTG
ASV46890	782	0.178154	TRUE	TRUE	USA (Urban)	d__Bacteria	Firmicutes	Christensenellales	Christensenellaceae	Christensenellaceae_R-7_group	Human (USA/Malawi/Venezuela)	TACGTAGGGGGCAAGCGTTGTCCGGAATGATTGGGCGTAAAGGGCGCGTAGGCGGCCTGGTAAGTTTGAAGTGAAAGTCCTTCTTTTAAGGAGGGAACTG
ASV46890	699	-0.257184	TRUE	TRUE	USA (Urban)	d__Bacteria	Firmicutes	Christensenellales	Christensenellaceae	Christensenellaceae_R-7_group	Human (USA/Malawi/Venezuela)	TACGTAGGGGGCAAGCGTTGTCCGGAATGATTGGGCGTAAAGGGCGCGTAGGCGGCCTGGTAAGTTTGAAGTGAAAGTCCTTCTTTTAAGGAGGGAACTG
ASV46939	505	0.0175823	TRUE	FALSE	USA (Urban)	d__Bacteria	Cyanobacteria	Gastranaerophilales	Gastranaerophilales	Gastranaerophilales	Human (USA/Malawi/Venezuela)	TACGGAGGGTGCAAGCGTTGTCCGGAATCATTGGGCGTAAAGAGTTCGTAGGTGGTTTGTTAAGTTTGGTGTTAAATGCAGAGGCTCAACTTCTGTTCGG
ASV46941	833	1.32228	TRUE	TRUE	USA (Urban)	d__Bacteria	Firmicutes	Lachnospirales	Lachnospiraceae	Lachnoclostridium	Human (USA/Malawi/Venezuela)	TACGTAGGGGGCAAGCGTTATCCGGATTTACTGGGTGTAAAGGGAGCGTAGACGGTAAAGCAAGTCTGAAGTGAAAGCCCGGGGCTCAACCCCGGGACTG
ASV46995	805	0.608268	TRUE	TRUE	USA (Urban)	d__Bacteria	Firmicutes	Oscillospirales	Ruminococcaceae	NA	Human (USA/Malawi/Venezuela)	TACGTAGGTGGCAAGCGTTGTCCGGAATTACTGGGTGTAAAGGGAGCGTAGGCGGGGATACAAGTTGAATGTTAAAACTATGGGCTCAACCCATAGTTGC
ASV46995	781	-1.23759	TRUE	TRUE	USA (Urban)	d__Bacteria	Firmicutes	Oscillospirales	Ruminococcaceae	NA	Human (USA/Malawi/Venezuela)	TACGTAGGTGGCAAGCGTTGTCCGGAATTACTGGGTGTAAAGGGAGCGTAGGCGGGGATACAAGTTGAATGTTAAAACTATGGGCTCAACCCATAGTTGC
ASV47000	807	0.344247	TRUE	TRUE	Venezuela (Rural)	d__Bacteria	Firmicutes	Lachnospirales	Lachnospiraceae	Lachnospiraceae_NK4A136_group	Human (USA/Malawi/Venezuela)	TACGTAGGGGGCAAGCGTTATCCGGATTTACTGGGTGTAAAGGGAGCGTAGACGGTGAAGCAAGTCTGAAGTGAAAGGTTGGGGCTCAACCCCGAAACTG
ASV47000	812	-0.230294	TRUE	TRUE	Malawi (Rural)	d__Bacteria	Firmicutes	Lachnospirales	Lachnospiraceae	Lachnospiraceae_NK4A136_group	Human (USA/Malawi/Venezuela)	TACGTAGGGGGCAAGCGTTATCCGGATTTACTGGGTGTAAAGGGAGCGTAGACGGTGAAGCAAGTCTGAAGTGAAAGGTTGGGGCTCAACCCCGAAACTG
ASV47007	552	-0.726332	TRUE	FALSE	Malawi (Rural)	d__Bacteria	Verrucomicrobiota	Verrucomicrobiales	Akkermansiaceae	Akkermansia	Human (USA/Malawi/Venezuela)	TACAGAGGTCTCAAGCGTTGTTCGGAATCACTGGGCGTAAAGCGTGCGTAGGCTGTTTCGTAAGTCGTGTGTGAAAGGCGCGGGCTCAACTCGCGGACGG
ASV47007	463	0.458967	TRUE	FALSE	Venezuela (Rural)	d__Bacteria	Verrucomicrobiota	Verrucomicrobiales	Akkermansiaceae	Akkermansia	Human (USA/Malawi/Venezuela)	TACAGAGGTCTCAAGCGTTGTTCGGAATCACTGGGCGTAAAGCGTGCGTAGGCTGTTTCGTAAGTCGTGTGTGAAAGGCGCGGGCTCAACTCGCGGACGG
ASV47065	710	1.01447	TRUE	TRUE	Venezuela (Rural)	d__Bacteria	Firmicutes	Clostridiales	Clostridiaceae	Clostridium_sensu_stricto_1	Human (USA/Malawi/Venezuela)	TACGTAGGTGGCGAGCGTTGTCCGGATTTACTGGGCGTAAAGGGAGCGTAGGCGGACTTTTAAGTGAGATGTGAAATACCCGGGCTCAACTTGGGTGCTG
ASV47065	744	-2.05252	TRUE	TRUE	Malawi (Rural)	d__Bacteria	Firmicutes	Clostridiales	Clostridiaceae	Clostridium_sensu_stricto_1	Human (USA/Malawi/Venezuela)	TACGTAGGTGGCGAGCGTTGTCCGGATTTACTGGGCGTAAAGGGAGCGTAGGCGGACTTTTAAGTGAGATGTGAAATACCCGGGCTCAACTTGGGTGCTG
ASV47067	582	-0.30984	TRUE	FALSE	Malawi (Rural)	d__Bacteria	Firmicutes	Lachnospirales	Defluviitaleaceae	Defluviitaleaceae_UCG-011	Human (USA/Malawi/Venezuela)	TACGTAGGGGGCGAGCGTTATCCGGAATTACTGGGTGTAAAGGGTGCGTAGGCGGCACCGTAAGTCTGTTGTGAAAGGCGATGGCTTAACCATCGAAGTG
ASV47067	492	0.303287	TRUE	FALSE	Venezuela (Rural)	d__Bacteria	Firmicutes	Lachnospirales	Defluviitaleaceae	Defluviitaleaceae_UCG-011	Human (USA/Malawi/Venezuela)	TACGTAGGGGGCGAGCGTTATCCGGAATTACTGGGTGTAAAGGGTGCGTAGGCGGCACCGTAAGTCTGTTGTGAAAGGCGATGGCTTAACCATCGAAGTG
ASV47089	729	-0.104505	TRUE	TRUE	USA (Urban)	d__Bacteria	Firmicutes	Lachnospirales	Lachnospiraceae	NA	Human (USA/Malawi/Venezuela)	TACGTAGGGGGCAAGCGTTATCCGGATTTACTGGGTGTAAAGGGAGCGTAGACGGCACAGCAAGTCTGATGTGAAAGCCCGGGGCCCAACCCCGGAACTG
ASV47089	755	-0.434017	TRUE	TRUE	Malawi (Rural)	d__Bacteria	Firmicutes	Lachnospirales	Lachnospiraceae	NA	Human (USA/Malawi/Venezuela)	TACGTAGGGGGCAAGCGTTATCCGGATTTACTGGGTGTAAAGGGAGCGTAGACGGCACAGCAAGTCTGATGTGAAAGCCCGGGGCCCAACCCCGGAACTG
ASV47108	815	1.39807	TRUE	TRUE	Venezuela (Rural)	d__Bacteria	Firmicutes	Lachnospirales	Lachnospiraceae	[Eubacterium]_ruminantium_group	Human (USA/Malawi/Venezuela)	TACGTATGGTGCAAGCGTTATCCGGATTTACTGGGTGTAAAGGGTGCGTAGGTGGTATGGCAAGTCAGAAGTGAAAGGCTGGGGCTCAACCCCGGGACTG
ASV47108	796	-0.899443	TRUE	TRUE	Malawi (Rural)	d__Bacteria	Firmicutes	Lachnospirales	Lachnospiraceae	[Eubacterium]_ruminantium_group	Human (USA/Malawi/Venezuela)	TACGTATGGTGCAAGCGTTATCCGGATTTACTGGGTGTAAAGGGTGCGTAGGTGGTATGGCAAGTCAGAAGTGAAAGGCTGGGGCTCAACCCCGGGACTG
ASV47152	834	1.34265	TRUE	TRUE	Venezuela (Rural)	d__Bacteria	Firmicutes	Erysipelotrichales	Erysipelotrichaceae	uncultured	Human (USA/Malawi/Venezuela)	TACGTAGGTGGCAAGCGTTATCCGGATTTATTGGGCGTAAAGGGTGCGCAGGCGGATTGTTAAGTTCGAGGTGAAAGCGTTGGGCTCAACCCAATATAGC
ASV47152	842	-0.499735	TRUE	TRUE	Malawi (Rural)	d__Bacteria	Firmicutes	Erysipelotrichales	Erysipelotrichaceae	uncultured	Human (USA/Malawi/Venezuela)	TACGTAGGTGGCAAGCGTTATCCGGATTTATTGGGCGTAAAGGGTGCGCAGGCGGATTGTTAAGTTCGAGGTGAAAGCGTTGGGCTCAACCCAATATAGC
ASV47242	518	-0.498769	TRUE	FALSE	Malawi (Rural)	d__Bacteria	Proteobacteria	Rhodospirillales	uncultured	uncultured	Human (USA/Malawi/Venezuela)	TACGAAGGGGGCGAGCGTTGTTCGGAATTACTGGGCGTAAAGGGTGTGTAGGCGGTTATGTAAGATAGCGGTGAAATCCCGGGGCTTAACCTCGGAATAG
ASV47247	775	-0.185668	TRUE	TRUE	USA (Urban)	d__Bacteria	Firmicutes	Clostridia_vadinBB60_group	Clostridia_vadinBB60_group	Clostridia_vadinBB60_group	Human (USA/Malawi/Venezuela)	TACGTAGGGGGCGAGCGTTGTCCGGAATGACTGGGCGTAAAGGGTGTGTAGGTGGTTTGATAAGTTAGATGTGTAATACCCAGGGCTTAACTCGGGTGCT
ASV47247	795	0.644492	TRUE	TRUE	USA (Urban)	d__Bacteria	Firmicutes	Clostridia_vadinBB60_group	Clostridia_vadinBB60_group	Clostridia_vadinBB60_group	Human (USA/Malawi/Venezuela)	TACGTAGGGGGCGAGCGTTGTCCGGAATGACTGGGCGTAAAGGGTGTGTAGGTGGTTTGATAAGTTAGATGTGTAATACCCAGGGCTTAACTCGGGTGCT
ASV47397	491	-0.239626	TRUE	FALSE	Malawi (Rural)	d__Bacteria	Firmicutes	Oscillospirales	Ruminococcaceae	NA	Human (USA/Malawi/Venezuela)	TACGTAGGTGGCAAGCGTTGTCCGGAATTACTGGGTGTAAAGGGAGCGTAGGCGGGAGTGCAAGTTGAATGTGAAAACTATGGGCTCAACCCATAGTTGC
ASV47440	462	0.0307737	TRUE	FALSE	USA (Urban)	d__Bacteria	Firmicutes	Christensenellales	Christensenellaceae	uncultured	Human (USA/Malawi/Venezuela)	TACGTAGGGAGCGAGCGTTGTCCGGAATTACTGGGCGTAAAGGGTGCGTAGGCGGTTATTTAAGTCAGATGTGAAATACTTGAGCTTAACTCAGGGGCTG
ASV47470	490	0.0775733	TRUE	FALSE	USA (Urban)	d__Bacteria	Firmicutes	Oscillospirales	Ruminococcaceae	Ruminococcus	Human (USA/Malawi/Venezuela)	TACGTAGGGAGCGAGCGTTGTCCGGAATTACTGGGTGTAAAGGGAGCGTAGGCGGGACGGTAAGTCAGGTGTGAAATATACGTGCTCAACATGTAGACTG
ASV47497	549	-0.679027	TRUE	FALSE	Malawi (Rural)	d__Bacteria	Firmicutes	Lachnospirales	Lachnospiraceae	Lachnospiraceae	Human (USA/Malawi/Venezuela)	TACGTAGGGGGCAAGCGTTATCCGGAATTACTGGGTGTAAAGGGAGAGTAGGCGGCAATTTAAGCCAGATGTGAAAGCCTATGGCTTAACCGTAGGATTG
ASV47497	442	0.671988	TRUE	FALSE	Venezuela (Rural)	d__Bacteria	Firmicutes	Lachnospirales	Lachnospiraceae	Lachnospiraceae	Human (USA/Malawi/Venezuela)	TACGTAGGGGGCAAGCGTTATCCGGAATTACTGGGTGTAAAGGGAGAGTAGGCGGCAATTTAAGCCAGATGTGAAAGCCTATGGCTTAACCGTAGGATTG
ASV4773	810	1.77516	TRUE	TRUE	USA (Urban)	d__Bacteria	Firmicutes	Oscillospirales	Oscillospiraceae	uncultured	Human (USA/Malawi/Venezuela)	TACGTAGGTGGCAAGCGTTGTCCGGATTTACTGGGTGTAAAGGGCGTGTAGGCGGGAAGATAAGTCAGGCGTGAAAACCAGAGGCTCAACCTCTGGCCTG
ASV4773	786	-1.09166	TRUE	TRUE	USA (Urban)	d__Bacteria	Firmicutes	Oscillospirales	Oscillospiraceae	uncultured	Human (USA/Malawi/Venezuela)	TACGTAGGTGGCAAGCGTTGTCCGGATTTACTGGGTGTAAAGGGCGTGTAGGCGGGAAGATAAGTCAGGCGTGAAAACCAGAGGCTCAACCTCTGGCCTG
ASV4915	813	0.609458	TRUE	TRUE	USA (Urban)	d__Bacteria	Firmicutes	Peptostreptococcales-Tissierellales	Anaerovoracaceae	Family_XIII_AD3011_group	Human (USA/Malawi/Venezuela)	TACGTAGGGGGCAAGCGTTATCCGGAATTATTGGGCGTAAAGAGTGCGTAGGTGGTTACCTAAGCAGGGGGTGAAAGGCTATGGCTTAACCATAGTTAGC
ASV4945	669	-0.304485	TRUE	TRUE	Malawi (Rural)	d__Bacteria	Firmicutes	Lachnospirales	Lachnospiraceae	Lachnospiraceae_ND3007_group	Human (USA/Malawi/Venezuela)	TACGTATGGTGCAAGCGTTATCCGGATTTACTGGGTGTAAAGGGAGCGTAGGTGGCAAGGCAAGCCAGAAGTGAAAACCCGGGGCTCAACCGCGGGATTG
ASV4977	433	0.202183	TRUE	FALSE	Venezuela (Rural)	d__Bacteria	Firmicutes	Oscillospirales	NA	NA	Human (USA/Malawi/Venezuela)	TACGTAGGTGGCAAGCGTTGTCCGGAATTACTGGGTGTAAAGGGAGCGTAGGCGGGATGCTAAGCAAATTGTGAAACCAATCGGCTCAACCGGTTGTTGC
ASV4977	529	-0.300247	TRUE	FALSE	Malawi (Rural)	d__Bacteria	Firmicutes	Oscillospirales	NA	NA	Human (USA/Malawi/Venezuela)	TACGTAGGTGGCAAGCGTTGTCCGGAATTACTGGGTGTAAAGGGAGCGTAGGCGGGATGCTAAGCAAATTGTGAAACCAATCGGCTCAACCGGTTGTTGC
ASV5009	512	-0.335763	TRUE	FALSE	Malawi (Rural)	d__Bacteria	Firmicutes	Erysipelotrichales	Erysipelotrichaceae	Dielma	Human (USA/Malawi/Venezuela)	TACGTAGGTGGCAAGCGTTATCCGGAATTATTGGGCGTAAAGGGTGCGTAGGCGGTGCGATAAGTCTGAGGTAAAAGGTTACAGCTCAACTGTAATACGC
ASV5016	508	-0.81996	TRUE	FALSE	Malawi (Rural)	d__Bacteria	Verrucomicrobiota	Verrucomicrobiales	Akkermansiaceae	Akkermansia	Human (USA/Malawi/Venezuela)	TACAGAGGTCTCAAGCGTTGTTCGGAATCACTGGGCGTAAAGCGTGCGTAGGCTGTTTCGTAAGTCGTGTGTGAAAGGCGCGGGCTCAACCCGTGGACGG
ASV5076	760	-0.622921	TRUE	TRUE	Malawi (Rural)	d__Bacteria	Firmicutes	Lachnospirales	Lachnospiraceae	Coprococcus	Human (USA/Malawi/Venezuela)	TACGTATGGTGCAAGCGTTATCCGGATTTACTGGGTGTAAAGGGTGCGTAGGTGGCAAGGCAAGTCTGAAGTGAAAATCCGGGGCTCAACCCCGGAACTG
ASV5076	723	0.689007	TRUE	TRUE	Venezuela (Rural)	d__Bacteria	Firmicutes	Lachnospirales	Lachnospiraceae	Coprococcus	Human (USA/Malawi/Venezuela)	TACGTATGGTGCAAGCGTTATCCGGATTTACTGGGTGTAAAGGGTGCGTAGGTGGCAAGGCAAGTCTGAAGTGAAAATCCGGGGCTCAACCCCGGAACTG
ASV5093	480	0.276924	TRUE	FALSE	USA (Urban)	d__Bacteria	Firmicutes	Lachnospirales	Lachnospiraceae	Lachnoclostridium	Human (USA/Malawi/Venezuela)	TACGTAGGGGGCAAGCGTTATCCGGATTTACTGGGTGTAAAGGGAGCGTAGACGGTAAAGCAAGTCTGAAGTGAAAGCCCGCGGCTCAACTGCGGGACTG
ASV510	599	0.759413	TRUE	FALSE	USA (Urban)	d__Bacteria	Firmicutes	Lachnospirales	Lachnospiraceae	Lachnoclostridium	Human (USA/Malawi/Venezuela)	TACGTAGGGGGCAAGCGTTATCCGGATTTACTGGGTGTAAAGGGAGCGTAGACGGCGAAGCAAGTCTGAAGTGAAAACCCAGGGCTCAACCCTGGGACTG
ASV5139	786	0.139658	TRUE	TRUE	Venezuela (Rural)	d__Bacteria	Firmicutes	Oscillospirales	Butyricicoccaceae	Butyricicoccus	Human (USA/Malawi/Venezuela)	TACGTAGGGAGCAAGCGTTATCCGGATTTACTGGGTGTAAAGGGCGCGCAGGCGGGCCGGCAAGTTGGGAGTGAAATCCCGGGGCTTAACCCCGGAACTG
ASV5139	816	-0.237084	TRUE	TRUE	Malawi (Rural)	d__Bacteria	Firmicutes	Oscillospirales	Butyricicoccaceae	Butyricicoccus	Human (USA/Malawi/Venezuela)	TACGTAGGGAGCAAGCGTTATCCGGATTTACTGGGTGTAAAGGGCGCGCAGGCGGGCCGGCAAGTTGGGAGTGAAATCCCGGGGCTTAACCCCGGAACTG
ASV5213	637	-0.139162	TRUE	TRUE	Malawi (Rural)	d__Bacteria	Firmicutes	Lachnospirales	Lachnospiraceae	Coprococcus	Human (USA/Malawi/Venezuela)	TACGTAGGTGGCAAGGCAAGTCTGAAGTGAAAATCCGGGGCTCAACCCCGGAACTGCTTTGGAAACTGTTTAGCTGGAGTACAGGAGAGGTAAGTGGAAT
ASV5213	488	0.196085	TRUE	FALSE	Venezuela (Rural)	d__Bacteria	Firmicutes	Lachnospirales	Lachnospiraceae	Coprococcus	Human (USA/Malawi/Venezuela)	TACGTAGGTGGCAAGGCAAGTCTGAAGTGAAAATCCGGGGCTCAACCCCGGAACTGCTTTGGAAACTGTTTAGCTGGAGTACAGGAGAGGTAAGTGGAAT
ASV5221	567	-0.0325383	TRUE	FALSE	Malawi (Rural)	d__Bacteria	Firmicutes	Lachnospirales	Lachnospiraceae	Roseburia	Human (USA/Malawi/Venezuela)	TACGTATGGTGCAAGCGTTATCCGGATTTACTGGGTGTAAAGGGAGCGCAGGCGGAAGGCTAAGTCTGATGTGAAAGCCCGGGGCTCAACCCCGGTACTG
ASV530	744	2.05748	TRUE	TRUE	USA (Urban)	d__Bacteria	Bacteroidota	Bacteroidales	Bacteroidaceae	Bacteroides	Human (USA/Malawi/Venezuela)	TACGGAGGATCCGAGCGTTATCCGGATTTATTGGGTTTAAAGGGAGCGTAGGCGGGTTGTTAAGTCAGTTGTGAAAGTTTGCGGCTCAACCGTAAAATTG
ASV530	522	-1.71561	TRUE	FALSE	USA (Urban)	d__Bacteria	Bacteroidota	Bacteroidales	Bacteroidaceae	Bacteroides	Human (USA/Malawi/Venezuela)	TACGGAGGATCCGAGCGTTATCCGGATTTATTGGGTTTAAAGGGAGCGTAGGCGGGTTGTTAAGTCAGTTGTGAAAGTTTGCGGCTCAACCGTAAAATTG
ASV5307	589	0.342521	TRUE	FALSE	Venezuela (Rural)	d__Bacteria	Firmicutes	Christensenellales	Christensenellaceae	Christensenellaceae_R-7_group	Human (USA/Malawi/Venezuela)	TACGTAGGGGGCGAGCGTTGTCCGGAATGACTGGGCGTAAAGGGCGTGTAGGCGGCTTTTTAAGTGTGGAGTGAAAGTCCACTTTTCAAGGGTGGAATTG
ASV5307	666	-0.429624	TRUE	TRUE	Malawi (Rural)	d__Bacteria	Firmicutes	Christensenellales	Christensenellaceae	Christensenellaceae_R-7_group	Human (USA/Malawi/Venezuela)	TACGTAGGGGGCGAGCGTTGTCCGGAATGACTGGGCGTAAAGGGCGTGTAGGCGGCTTTTTAAGTGTGGAGTGAAAGTCCACTTTTCAAGGGTGGAATTG
ASV5442	509	-0.0570485	TRUE	FALSE	Malawi (Rural)	d__Bacteria	Bacteroidota	Bacteroidales	Prevotellaceae	Paraprevotella	Human (USA/Malawi/Venezuela)	TACGGAAGATGCGAGCGTTATCCGGATTTATTGGGTTTAAAGGGAGCGTAGGCGGGCTTTTAAGTCAGCGGTCAAATGTCGTGGCTCAACCATGTCAAGC
ASV5448	717	-0.354508	TRUE	TRUE	Malawi (Rural)	d__Bacteria	Firmicutes	Oscillospirales	Ruminococcaceae	Subdoligranulum	Human (USA/Malawi/Venezuela)	AACGTAGGGTGCAAGCGTTGTCCGGAATTACTGGGTGTAAAGGGAGCGCAGGCGGACCGGCAAGTTGGAAGTGAAATCCATGGGCTCAACCCGTGAATTG
ASV5532	821	0.314345	TRUE	TRUE	USA (Urban)	d__Bacteria	Firmicutes	Oscillospirales	Oscillospiraceae	Oscillibacter	Human (USA/Malawi/Venezuela)	TACGTAGGTGGCAAGCGTTGTCCGGATTTACTGGGTGTAAAGGGCGTGCAGCCGGGCCGACAAGTCAGATGTGAAATCCCGAGGCTTAACCTCGGAACTG
ASV5532	831	0.80013	TRUE	TRUE	Venezuela (Rural)	d__Bacteria	Firmicutes	Oscillospirales	Oscillospiraceae	Oscillibacter	Human (USA/Malawi/Venezuela)	TACGTAGGTGGCAAGCGTTGTCCGGATTTACTGGGTGTAAAGGGCGTGCAGCCGGGCCGACAAGTCAGATGTGAAATCCCGAGGCTTAACCTCGGAACTG
ASV5536	799	0.0210156	TRUE	TRUE	Venezuela (Rural)	d__Bacteria	Firmicutes	Mycoplasmatales	Mycoplasmataceae	NA	Human (USA/Malawi/Venezuela)	TACGTAGGAGGCAAGCGTTATCCGGAATTATTGGGCGTAAAGAGCATGTAGGCGGTTTATTAAGTCTGATGTGAAAGCCAATGGCCTAACCATTGAATTG
ASV5548	809	-0.0738765	TRUE	TRUE	Malawi (Rural)	d__Bacteria	Firmicutes	Lachnospirales	Lachnospiraceae	Blautia	Human (USA/Malawi/Venezuela)	TACGTAGGGGGCGAGCGTTATCCGGATTTACTGGGTGTAAAGGGAGCGTAGACGGCGTATCAAGTCTGATGTGAAAGGCAGGGGCTTAACCCCTGGACTG
ASV5548	754	-0.329825	TRUE	TRUE	USA (Urban)	d__Bacteria	Firmicutes	Lachnospirales	Lachnospiraceae	Blautia	Human (USA/Malawi/Venezuela)	TACGTAGGGGGCGAGCGTTATCCGGATTTACTGGGTGTAAAGGGAGCGTAGACGGCGTATCAAGTCTGATGTGAAAGGCAGGGGCTTAACCCCTGGACTG
ASV5614	786	0.462406	TRUE	TRUE	USA (Urban)	d__Bacteria	Firmicutes	Peptostreptococcales-Tissierellales	Anaerovoracaceae	Family_XIII_AD3011_group	Human (USA/Malawi/Venezuela)	TACGTAGGGGGCGAGCGTTATCCGGAATTATTGGGCGTAAAGAGTACGTAGGTGGTTTCCTAAGCACAGGGTTTAAGGCTAAGGCTCAACCATAGTTCGC
ASV565	849	4.10495	TRUE	TRUE	Venezuela (Rural)	d__Bacteria	Firmicutes	Erysipelotrichales	Erysipelotrichaceae	Holdemanella	Human (USA/Malawi/Venezuela)	TACGTAGGTGGCGAGCGTTATCCGGAATGATTGGGCGTAAAGGGTGCGTAGGTGGCAGATCAAGTCTGGAGTAAAAGGTATGGGCTCAACCCGTACTGGC
ASV565	864	-3.35386	TRUE	TRUE	Malawi (Rural)	d__Bacteria	Firmicutes	Erysipelotrichales	Erysipelotrichaceae	Holdemanella	Human (USA/Malawi/Venezuela)	TACGTAGGTGGCGAGCGTTATCCGGAATGATTGGGCGTAAAGGGTGCGTAGGTGGCAGATCAAGTCTGGAGTAAAAGGTATGGGCTCAACCCGTACTGGC
ASV5653	562	-1.59122	TRUE	FALSE	USA (Urban)	d__Bacteria	Bacteroidota	Bacteroidales	Bacteroidaceae	Bacteroides	Human (USA/Malawi/Venezuela)	TACGGAGGATCCGAGCGTTATCCGGATTTATTGGGTTTAAAGGGAGCGTAGGCGGATTGTTAAGTCAGTTGTGAAAGTTTGCGGCTCAACCGTAAAATTG
ASV5677	563	-0.361627	TRUE	FALSE	USA (Urban)	d__Bacteria	Firmicutes	Staphylococcales	Gemellaceae	Gemella	Human (USA/Malawi/Venezuela)	TACGTAGGTGGCAAGCGTTGTCCGGAATTATTGGGCGTAAAGCGCGCGCAGGTGGTTTAATAAGTCTGATGTGAAAGCCCACGGCTCAACCGTGGAGGGG
ASV5677	693	0.149636	TRUE	TRUE	USA (Urban)	d__Bacteria	Firmicutes	Staphylococcales	Gemellaceae	Gemella	Human (USA/Malawi/Venezuela)	TACGTAGGTGGCAAGCGTTGTCCGGAATTATTGGGCGTAAAGCGCGCGCAGGTGGTTTAATAAGTCTGATGTGAAAGCCCACGGCTCAACCGTGGAGGGG
ASV5730	479	-0.373299	TRUE	FALSE	Malawi (Rural)	d__Bacteria	Actinobacteriota	Coriobacteriales	Eggerthellaceae	Eggerthella	Human (USA/Malawi/Venezuela)	TACGTAGGGAGCGAGCGTTATCCGGAATCATTGGGCGTAAAGAGCGCGTAGGCGGCCTCTCAAGCGGGATCTCTAATCCGAGGGCTCAACCCCCGGCCGG
ASV5741	803	-1.96449	TRUE	TRUE	USA (Urban)	d__Bacteria	Bacteroidota	Bacteroidales	Rikenellaceae	Alistipes	Human (USA/Malawi/Venezuela)	TACGGAGGATCCAAGCGTTATCCGGATTTATTGGGTTTAAAGGGTGCGTAGGCGGTTTGATAAGTTAGAGGTGAAATACCGGGGCTCAACTCCGGAACTG
ASV5741	827	1.93319	TRUE	TRUE	USA (Urban)	d__Bacteria	Bacteroidota	Bacteroidales	Rikenellaceae	Alistipes	Human (USA/Malawi/Venezuela)	TACGGAGGATCCAAGCGTTATCCGGATTTATTGGGTTTAAAGGGTGCGTAGGCGGTTTGATAAGTTAGAGGTGAAATACCGGGGCTCAACTCCGGAACTG
ASV5810	487	-0.468386	TRUE	FALSE	Malawi (Rural)	d__Bacteria	Desulfobacterota	Desulfovibrionales	Desulfovibrionaceae	Desulfovibrio	Human (USA/Malawi/Venezuela)	TACGGAGGGTGCAAGCGTTAATCGGAATTACTGGGCGTAAAGCGCGCGTAGGTTGTTTTGTAAGTCAGAGGTGTAATCCCACGGCTTAACCGTGGAACTG
ASV5823	794	0.732442	TRUE	TRUE	USA (Urban)	d__Bacteria	Firmicutes	Oscillospirales	UCG-010	UCG-010	Human (USA/Malawi/Venezuela)	TACGTAGGTGGCAAGCGTTATCCGGATTTACTGGGTGTAAAGGGTGTGTAGGCGGGAAAGTGGGTCAGATGTGAAATACCAAGGCTAAACCATGGAGCTG
ASV5823	768	-0.730413	TRUE	TRUE	USA (Urban)	d__Bacteria	Firmicutes	Oscillospirales	UCG-010	UCG-010	Human (USA/Malawi/Venezuela)	TACGTAGGTGGCAAGCGTTATCCGGATTTACTGGGTGTAAAGGGTGTGTAGGCGGGAAAGTGGGTCAGATGTGAAATACCAAGGCTAAACCATGGAGCTG
ASV5826	764	0.579921	TRUE	TRUE	USA (Urban)	d__Bacteria	Actinobacteriota	Micrococcales	Micrococcaceae	Rothia	Human (USA/Malawi/Venezuela)	TACGTAGGGCGCGAGCGTTGTCCGGAATTATTGGGCGTAAAGAGCTTGTAGGCGGTTTGTCGCGTCTGCTGTGAAAGGCCGGGGCTTAACCCCGTGTATT
ASV5826	498	0.346584	TRUE	FALSE	Venezuela (Rural)	d__Bacteria	Actinobacteriota	Micrococcales	Micrococcaceae	Rothia	Human (USA/Malawi/Venezuela)	TACGTAGGGCGCGAGCGTTGTCCGGAATTATTGGGCGTAAAGAGCTTGTAGGCGGTTTGTCGCGTCTGCTGTGAAAGGCCGGGGCTTAACCCCGTGTATT
ASV5911	830	-1.00891	TRUE	TRUE	Malawi (Rural)	d__Bacteria	Firmicutes	Oscillospirales	Oscillospiraceae	UCG-005	Human (USA/Malawi/Venezuela)	TACGTAGGTTGCAAGCGTTGTCCGGATTTACTGGGTGTAAAGGGCGTGTAGGCGGAGATGCAAGTCGGGAGTGAAATCCATGGGCTCAACCCATGAACTG
ASV5949	495	-0.425196	TRUE	FALSE	Malawi (Rural)	d__Bacteria	Firmicutes	Peptostreptococcales-Tissierellales	Anaerovoracaceae	[Eubacterium]_nodatum_group	Human (USA/Malawi/Venezuela)	TACGTAGGGGGCAAGCGTTATCCGGAATTATTGGGCGTAAAGAGTGCGTAGGTGGTTACCTAAGCGCAGGGTATAAGGCAATGGCTCAACCATTGTTCGC
ASV5961	719	0.00976105	TRUE	TRUE	USA (Urban)	d__Bacteria	Firmicutes	Peptostreptococcales-Tissierellales	Peptostreptococcales-Tissierellales	Gallicola	Human (USA/Malawi/Venezuela)	TACGTATGGTGCGAGCGTTGTCCGGAATTATTGGGCGTAAAGGGTACGTAGGCGGTTAAACAAGTCAGATGTAAAAACTTGAGGCTCAACCTCATGTAGC
ASV5961	467	0.307255	TRUE	FALSE	Venezuela (Rural)	d__Bacteria	Firmicutes	Peptostreptococcales-Tissierellales	Peptostreptococcales-Tissierellales	Gallicola	Human (USA/Malawi/Venezuela)	TACGTATGGTGCGAGCGTTGTCCGGAATTATTGGGCGTAAAGGGTACGTAGGCGGTTAAACAAGTCAGATGTAAAAACTTGAGGCTCAACCTCATGTAGC
ASV605	648	0.606975	TRUE	TRUE	Venezuela (Rural)	d__Bacteria	Firmicutes	Lachnospirales	Lachnospiraceae	[Eubacterium]_eligens_group	Human (USA/Malawi/Venezuela)	TACGTATGGAGCAAGCGTTATCCGGATTTACTGGGTGTAAAGGGAGTGTAGGTGGCCATGCAAGTCAGAAGTGAAAATCCGGGGCTCAACCCCGGAACTG
ASV605	702	-0.389099	TRUE	TRUE	Malawi (Rural)	d__Bacteria	Firmicutes	Lachnospirales	Lachnospiraceae	[Eubacterium]_eligens_group	Human (USA/Malawi/Venezuela)	TACGTATGGAGCAAGCGTTATCCGGATTTACTGGGTGTAAAGGGAGTGTAGGTGGCCATGCAAGTCAGAAGTGAAAATCCGGGGCTCAACCCCGGAACTG
ASV6072	788	0.466292	TRUE	TRUE	USA (Urban)	d__Bacteria	Firmicutes	Peptostreptococcales-Tissierellales	Anaerovoracaceae	Family_XIII_AD3011_group	Human (USA/Malawi/Venezuela)	TACGTAGGGGGCAAGCGTTATCCGGAATTATTGGGCGTAAAGAGTACGTAGGTGGTTTCCTAAGCACAGGGTTTAAGGCTAAGGCTCAACCATAGTTCGC
ASV6072	780	0.130599	TRUE	TRUE	Venezuela (Rural)	d__Bacteria	Firmicutes	Peptostreptococcales-Tissierellales	Anaerovoracaceae	Family_XIII_AD3011_group	Human (USA/Malawi/Venezuela)	TACGTAGGGGGCAAGCGTTATCCGGAATTATTGGGCGTAAAGAGTACGTAGGTGGTTTCCTAAGCACAGGGTTTAAGGCTAAGGCTCAACCATAGTTCGC
ASV6137	780	-0.960034	TRUE	TRUE	USA (Urban)	d__Bacteria	Firmicutes	Christensenellales	Christensenellaceae	Christensenellaceae_R-7_group	Human (USA/Malawi/Venezuela)	TACGTAGGGGGCGAGCGTTGTCCGGAATGACTGGGCGTAAAGGGCGTGTAGGCGGCCGATTAAGTATGGAGTGAAAGTCCTGCTTTCAAGGTGGGAATTG
ASV6137	799	0.804025	TRUE	TRUE	USA (Urban)	d__Bacteria	Firmicutes	Christensenellales	Christensenellaceae	Christensenellaceae_R-7_group	Human (USA/Malawi/Venezuela)	TACGTAGGGGGCGAGCGTTGTCCGGAATGACTGGGCGTAAAGGGCGTGTAGGCGGCCGATTAAGTATGGAGTGAAAGTCCTGCTTTCAAGGTGGGAATTG
ASV6267	598	0.135243	TRUE	TRUE	Venezuela (Rural)	d__Bacteria	Firmicutes	Lactobacillales	Lactobacillaceae	Lactobacillus	Human (USA/Malawi/Venezuela)	TACGTAGGTGGCAAGCGTTGTCCGGATTTATTGGGCGTAAAGCGAGCGCAGGCGGTTTTTTAAGTCTGATGTGAAAGCCTTCGGCTCAACCGAAGAAGTG
ASV6267	594	-0.394783	TRUE	FALSE	Malawi (Rural)	d__Bacteria	Firmicutes	Lactobacillales	Lactobacillaceae	Lactobacillus	Human (USA/Malawi/Venezuela)	TACGTAGGTGGCAAGCGTTGTCCGGATTTATTGGGCGTAAAGCGAGCGCAGGCGGTTTTTTAAGTCTGATGTGAAAGCCTTCGGCTCAACCGAAGAAGTG
ASV6311	504	-0.0781531	TRUE	FALSE	Malawi (Rural)	d__Bacteria	Firmicutes	Lachnospirales	Lachnospiraceae	Tyzzerella	Human (USA/Malawi/Venezuela)	TACGTATGGTGCAAGCGTTATCCGGATTTACTGGGTGTAAAGGGTGAGTAGGCGGTCATGCAAGTCATATGTGAAATGTCAGGGCTTAACCTTGGCGCTG
ASV6311	553	-0.148789	TRUE	FALSE	USA (Urban)	d__Bacteria	Firmicutes	Lachnospirales	Lachnospiraceae	Tyzzerella	Human (USA/Malawi/Venezuela)	TACGTATGGTGCAAGCGTTATCCGGATTTACTGGGTGTAAAGGGTGAGTAGGCGGTCATGCAAGTCATATGTGAAATGTCAGGGCTTAACCTTGGCGCTG
ASV6353	749	-0.0284433	TRUE	TRUE	USA (Urban)	d__Bacteria	Firmicutes	Clostridia_vadinBB60_group	Clostridia_vadinBB60_group	Clostridia_vadinBB60_group	Human (USA/Malawi/Venezuela)	TACGTAGGGGGCGAGCGTTGTCCGGAATGACTGGGCGTAAAGGGAGTGTAGGTGGCACAGCAAGTTATATGTGAAAGCCCGTGGCTCAACCACGGAACTG
ASV6359	805	0.300266	TRUE	TRUE	USA (Urban)	d__Bacteria	Actinobacteriota	Coriobacteriales	Coriobacteriales_Incertae_Sedis	uncultured	Human (USA/Malawi/Venezuela)	TACGTATGGAGCAAGCGTTATCCGGATTTATTGGGCGTAAAGCGCGCGTAGGCGGCTTGTTAAGCAAGGTCTTAAATCTTGGGGCTCAACCTCAAGCCGG
ASV6359	762	-0.000264394	TRUE	TRUE	USA (Urban)	d__Bacteria	Actinobacteriota	Coriobacteriales	Coriobacteriales_Incertae_Sedis	uncultured	Human (USA/Malawi/Venezuela)	TACGTATGGAGCAAGCGTTATCCGGATTTATTGGGCGTAAAGCGCGCGTAGGCGGCTTGTTAAGCAAGGTCTTAAATCTTGGGGCTCAACCTCAAGCCGG
ASV658	782	0.254068	TRUE	TRUE	Venezuela (Rural)	d__Bacteria	Firmicutes	Oscillospirales	Oscillospiraceae	Colidextribacter	Human (USA/Malawi/Venezuela)	TACGTAGGTGGCGAGCGTTATCCGGATTTACTGGGTGTAAAGGGCGTGTAGGCGGGACTGCAAGTCAGATGTGAAAACCATGGGCTCAACCTGTGGCCTG
ASV658	813	-0.265756	TRUE	TRUE	Malawi (Rural)	d__Bacteria	Firmicutes	Oscillospirales	Oscillospiraceae	Colidextribacter	Human (USA/Malawi/Venezuela)	TACGTAGGTGGCGAGCGTTATCCGGATTTACTGGGTGTAAAGGGCGTGTAGGCGGGACTGCAAGTCAGATGTGAAAACCATGGGCTCAACCTGTGGCCTG
ASV6629	808	-0.288159	TRUE	TRUE	Malawi (Rural)	d__Bacteria	Firmicutes	Oscillospirales	Ruminococcaceae	Ruminococcus	Human (USA/Malawi/Venezuela)	TACGTAGGGAGCAAGCGTTGTCCGGAATTACTGGGTGTAAAGGGAGTGTAGGCGGGATGGTAAGTTAGGTGTGAAATCTATGGGCTCAACCCATAAATTG
ASV6729	827	-1.03535	TRUE	TRUE	USA (Urban)	d__Bacteria	Firmicutes	Erysipelotrichales	Erysipelotrichaceae	[Clostridium]_innocuum_group	Human (USA/Malawi/Venezuela)	TACGTAGGTGGCAAGCGTTATCCGGAATCATTGGGCGTAAAGGGTGCGTAGGTGGCGTACTAAGTCTGTAGTAAAAGGCAATGGCTCAACCATTGTAAGC
ASV6729	858	0.535966	TRUE	TRUE	USA (Urban)	d__Bacteria	Firmicutes	Erysipelotrichales	Erysipelotrichaceae	[Clostridium]_innocuum_group	Human (USA/Malawi/Venezuela)	TACGTAGGTGGCAAGCGTTATCCGGAATCATTGGGCGTAAAGGGTGCGTAGGTGGCGTACTAAGTCTGTAGTAAAAGGCAATGGCTCAACCATTGTAAGC
ASV6754	788	1.45872	TRUE	TRUE	USA (Urban)	d__Bacteria	NA	NA	NA	NA	Human (USA/Malawi/Venezuela)	CACGATTAACCCAAGTCAATAGAAGCCGGCGTAAAGAGTGTTTTAGATCACCCCCTCCCCAATAAAGCTAAAACTCACCTGAGTTGTAAAAAACTCCAGT
ASV6754	768	-1.2311	TRUE	TRUE	USA (Urban)	d__Bacteria	NA	NA	NA	NA	Human (USA/Malawi/Venezuela)	CACGATTAACCCAAGTCAATAGAAGCCGGCGTAAAGAGTGTTTTAGATCACCCCCTCCCCAATAAAGCTAAAACTCACCTGAGTTGTAAAAAACTCCAGT
ASV6794	754	2.36363	TRUE	TRUE	USA (Urban)	d__Bacteria	Desulfobacterota	Desulfovibrionales	Desulfovibrionaceae	Bilophila	Human (USA/Malawi/Venezuela)	TACGGAGGGTGCAAGCGTTAATCGGAATCACTGGGCGTAAAGCGCACGTAGGCGGCTTGGTAAGTCAGGGGTGAAATCCCACAGCCCAACTGTGGAACTG
ASV6794	445	-1.33734	TRUE	FALSE	USA (Urban)	d__Bacteria	Desulfobacterota	Desulfovibrionales	Desulfovibrionaceae	Bilophila	Human (USA/Malawi/Venezuela)	TACGGAGGGTGCAAGCGTTAATCGGAATCACTGGGCGTAAAGCGCACGTAGGCGGCTTGGTAAGTCAGGGGTGAAATCCCACAGCCCAACTGTGGAACTG
ASV6813	637	-0.244045	TRUE	TRUE	USA (Urban)	d__Bacteria	Firmicutes	Oscillospirales	UCG-010	UCG-010	Human (USA/Malawi/Venezuela)	TACGTAGGTGGCGAGCGTTATCCGGAATTACTGGGTGTAAAGGGTGTGTAGGCGGGACGACAAGTCAGATGTGAAAATTGCAGGCTCAACCTGGAAAGTG
ASV6813	696	0.235095	TRUE	TRUE	USA (Urban)	d__Bacteria	Firmicutes	Oscillospirales	UCG-010	UCG-010	Human (USA/Malawi/Venezuela)	TACGTAGGTGGCGAGCGTTATCCGGAATTACTGGGTGTAAAGGGTGTGTAGGCGGGACGACAAGTCAGATGTGAAAATTGCAGGCTCAACCTGGAAAGTG
ASV6814	457	0.0968278	TRUE	FALSE	USA (Urban)	d__Bacteria	Firmicutes	Oscillospirales	Ruminococcaceae	Angelakisella	Human (USA/Malawi/Venezuela)	TACGTAGGGAGCGAGCGTTGTCCGGAATTACTGGGTGTAAAGGGAGCGTAGGCGGGAAGGCAAGTTGGATGTGAAAACTGTGGGCTCAACCTACAGACTG
ASV6855	725	0.656367	TRUE	TRUE	USA (Urban)	d__Bacteria	Firmicutes	Oscillospirales	Oscillospiraceae	NK4A214_group	Human (USA/Malawi/Venezuela)	TACGTAGGTGGCGAGCGTTATCCGGATTTACTGGGTGTAAAGGGCGCGTAGGCGGGAATGCAAGTCAGATGTGAAATCCAGGGGCTTAACCCTTGAACTG
ASV6855	674	-0.251428	TRUE	TRUE	USA (Urban)	d__Bacteria	Firmicutes	Oscillospirales	Oscillospiraceae	NK4A214_group	Human (USA/Malawi/Venezuela)	TACGTAGGTGGCGAGCGTTATCCGGATTTACTGGGTGTAAAGGGCGCGTAGGCGGGAATGCAAGTCAGATGTGAAATCCAGGGGCTTAACCCTTGAACTG
ASV7007	803	0.94178	TRUE	TRUE	USA (Urban)	d__Bacteria	Firmicutes	Clostridia_vadinBB60_group	Clostridia_vadinBB60_group	Clostridia_vadinBB60_group	Human (USA/Malawi/Venezuela)	TACGTAGGTGGCAAGCGTTGTCCGGAATGACTGGGCGTAAAGGGTGCGTAGGTGGCTATTCAAGTTAGCGGTGAAATCCCGGGGCTCAACTCCGGTGCTA
ASV7037	787	1.27266	TRUE	TRUE	USA (Urban)	d__Bacteria	Firmicutes	Lactobacillales	Lactobacillaceae	Lactobacillus	Human (USA/Malawi/Venezuela)	TACGTAGGTGGCAAGCGTTATCCGGATTTATTGGGCGTAAAGCGAGCGCAGGCGGTTTGATAAGTCTGATGTGAAAGCCTTTGGCTTAACCAAAGAAGTG
ASV7037	782	-1.55113	TRUE	TRUE	USA (Urban)	d__Bacteria	Firmicutes	Lactobacillales	Lactobacillaceae	Lactobacillus	Human (USA/Malawi/Venezuela)	TACGTAGGTGGCAAGCGTTATCCGGATTTATTGGGCGTAAAGCGAGCGCAGGCGGTTTGATAAGTCTGATGTGAAAGCCTTTGGCTTAACCAAAGAAGTG
ASV7073	836	-1.6287	TRUE	TRUE	Malawi (Rural)	d__Bacteria	Bacteroidota	Bacteroidales	Prevotellaceae	Prevotella	Human (USA/Malawi/Venezuela)	TACGGAAGGTCCGGGCGTTATCCGGATTTATTGGGTTTAAAGGGAGCGTAGGCCGTTTGTTAAGCGTGTTGTGAAATGTCGGGGCTCAACCTGGGCATTG
ASV7090	782	-0.625683	TRUE	TRUE	USA (Urban)	d__Bacteria	Firmicutes	Christensenellales	Christensenellaceae	Christensenellaceae_R-7_group	Human (USA/Malawi/Venezuela)	TACGTAGGGGGCAAGCGTTGTCCGGAATGATTGGGCGTAAAGGGCGTGTAGGCGGCCTGGTAAGTCTGGAGTGAAAGTCCTGTTTTTAAGATGGGAATTG
ASV7090	812	0.761285	TRUE	TRUE	USA (Urban)	d__Bacteria	Firmicutes	Christensenellales	Christensenellaceae	Christensenellaceae_R-7_group	Human (USA/Malawi/Venezuela)	TACGTAGGGGGCAAGCGTTGTCCGGAATGATTGGGCGTAAAGGGCGTGTAGGCGGCCTGGTAAGTCTGGAGTGAAAGTCCTGTTTTTAAGATGGGAATTG
ASV7183	865	-2.09907	TRUE	TRUE	Malawi (Rural)	d__Bacteria	Proteobacteria	Burkholderiales	NA	NA	Human (USA/Malawi/Venezuela)	TACGTAGGGTGCAAGCGTTAATCGGAATTACTGGGCGTAAAGCGTGCGCAGGCGGTTGGGTAAGACAGATGTGAAATCCCCGGGCTTAACCTGGGAACTG
ASV7183	829	1.75872	TRUE	TRUE	Venezuela (Rural)	d__Bacteria	Proteobacteria	Burkholderiales	NA	NA	Human (USA/Malawi/Venezuela)	TACGTAGGGTGCAAGCGTTAATCGGAATTACTGGGCGTAAAGCGTGCGCAGGCGGTTGGGTAAGACAGATGTGAAATCCCCGGGCTTAACCTGGGAACTG
ASV7227	819	0.641434	TRUE	TRUE	Venezuela (Rural)	d__Bacteria	Firmicutes	Oscillospirales	Oscillospiraceae	NK4A214_group	Human (USA/Malawi/Venezuela)	TACGTAGGGAGCAAGCGTTATCCGGATTTACTGGGTGTAAAGGGCGCGTAGGCGGGATGGCAAGTCAGATGTGAAATCTCAGGGCTCAACCCTGAAACTG
ASV7227	816	-0.35016	TRUE	TRUE	Malawi (Rural)	d__Bacteria	Firmicutes	Oscillospirales	Oscillospiraceae	NK4A214_group	Human (USA/Malawi/Venezuela)	TACGTAGGGAGCAAGCGTTATCCGGATTTACTGGGTGTAAAGGGCGCGTAGGCGGGATGGCAAGTCAGATGTGAAATCTCAGGGCTCAACCCTGAAACTG
ASV7273	803	-0.71224	TRUE	TRUE	USA (Urban)	d__Bacteria	Firmicutes	Peptostreptococcales-Tissierellales	Anaerovoracaceae	Family_XIII_UCG-001	Human (USA/Malawi/Venezuela)	TACGTAGGGGGCAAGCGTTGTCCGGAATTATTGGGCGTAAAGAGTACGTAGGCGGTTTGCTAAGCGCAAGGTGAAAGGCAGTGGCTTAACCATTGTAAGC
ASV7273	842	0.694667	TRUE	TRUE	USA (Urban)	d__Bacteria	Firmicutes	Peptostreptococcales-Tissierellales	Anaerovoracaceae	Family_XIII_UCG-001	Human (USA/Malawi/Venezuela)	TACGTAGGGGGCAAGCGTTGTCCGGAATTATTGGGCGTAAAGAGTACGTAGGCGGTTTGCTAAGCGCAAGGTGAAAGGCAGTGGCTTAACCATTGTAAGC
ASV7276	836	-1.54773	TRUE	TRUE	USA (Urban)	d__Bacteria	Firmicutes	Oscillospirales	Oscillospiraceae	Flavonifractor	Human (USA/Malawi/Venezuela)	TACGTAGGTGGCAAGCGTTATCCGGATTTACTGGGTGTAAAGGGCGTGTAGGCGGGATTGCAAGTCAGATGTGAAAACTGGGGGCTCAACCTCCAGCCTG
ASV7276	863	1.70105	TRUE	TRUE	USA (Urban)	d__Bacteria	Firmicutes	Oscillospirales	Oscillospiraceae	Flavonifractor	Human (USA/Malawi/Venezuela)	TACGTAGGTGGCAAGCGTTATCCGGATTTACTGGGTGTAAAGGGCGTGTAGGCGGGATTGCAAGTCAGATGTGAAAACTGGGGGCTCAACCTCCAGCCTG
ASV7317	774	0.391967	TRUE	TRUE	Venezuela (Rural)	d__Bacteria	Firmicutes	Clostridia_vadinBB60_group	Clostridia_vadinBB60_group	Clostridia_vadinBB60_group	Human (USA/Malawi/Venezuela)	TACGTAGGGAGCGAGCGTTGTCCGGAATTACTGGGCGTAAAGGGCGCGTAGGCGGTAGATCAAGTCGCATGTGAAATACCCGGGCTCAACCTGGGGGGTG
ASV7317	812	-0.520401	TRUE	TRUE	Malawi (Rural)	d__Bacteria	Firmicutes	Clostridia_vadinBB60_group	Clostridia_vadinBB60_group	Clostridia_vadinBB60_group	Human (USA/Malawi/Venezuela)	TACGTAGGGAGCGAGCGTTGTCCGGAATTACTGGGCGTAAAGGGCGCGTAGGCGGTAGATCAAGTCGCATGTGAAATACCCGGGCTCAACCTGGGGGGTG
ASV7369	831	0.974747	TRUE	TRUE	Venezuela (Rural)	d__Bacteria	Firmicutes	Lachnospirales	Lachnospiraceae	NA	Human (USA/Malawi/Venezuela)	TACGTAGGGGGCAAGCGTTATCCGGATTTACTGGGTGTAAAGGGAGCGTAGACGGCGATGCAAGTCTGAAGTGAAAGCCCCGGGCTCAACCTGGGTACTG
ASV7412	703	-0.582109	TRUE	TRUE	USA (Urban)	d__Bacteria	Bacteroidota	Bacteroidales	Marinifilaceae	Butyricimonas	Human (USA/Malawi/Venezuela)	TACGGGGGATGCGAGCGTTATCCGGATTTATTGGGTTTAAAGGGCGCGTAGGCGGGACGTCAAGTCAGCGGTAAAAGACTGCAGCTAAACTGTAGCACGC
ASV7428	776	-1.50344	TRUE	TRUE	USA (Urban)	d__Bacteria	Proteobacteria	Pseudomonadales	Moraxellaceae	Acinetobacter	Human (USA/Malawi/Venezuela)	TACAGAGGGTGCGAGCGTTAATCGGATTTACTGGGCGTAAAGCGTGCGTAGGCGGCTTTTTAAGTCGGATGTGAAATCCCTGAGCTTAACTTAGGAATTG
ASV7498	498	-0.368551	TRUE	FALSE	Malawi (Rural)	d__Bacteria	Firmicutes	Christensenellales	Christensenellaceae	Christensenellaceae	Human (USA/Malawi/Venezuela)	TACGTAGGGAGCAAGCGTTGTCCGGAATTACTGGGCGTAAAGGGTGCGTAGGTGGCCATGTAAGTTAGGTGTGAAAGACCGGGGCTTAACCCCGGGGCGG
ASV7498	457	-0.314562	TRUE	FALSE	USA (Urban)	d__Bacteria	Firmicutes	Christensenellales	Christensenellaceae	Christensenellaceae	Human (USA/Malawi/Venezuela)	TACGTAGGGAGCAAGCGTTGTCCGGAATTACTGGGCGTAAAGGGTGCGTAGGTGGCCATGTAAGTTAGGTGTGAAAGACCGGGGCTTAACCCCGGGGCGG
ASV7609	792	-0.490113	TRUE	TRUE	USA (Urban)	d__Bacteria	Firmicutes	Oscillospirales	Ruminococcaceae	DTU089	Human (USA/Malawi/Venezuela)	TACGTAGGGAGCGAGCGTTGTCCGGATTTACTGGGTGTAAAGGGTGCGTAGGCGGATCTGCAAGTCAGTAGTGAAATCCCAGGGCTTAACCCTGGAACTG
ASV7609	832	0.441589	TRUE	TRUE	USA (Urban)	d__Bacteria	Firmicutes	Oscillospirales	Ruminococcaceae	DTU089	Human (USA/Malawi/Venezuela)	TACGTAGGGAGCGAGCGTTGTCCGGATTTACTGGGTGTAAAGGGTGCGTAGGCGGATCTGCAAGTCAGTAGTGAAATCCCAGGGCTTAACCCTGGAACTG
ASV7676	502	-0.151338	TRUE	FALSE	Malawi (Rural)	d__Bacteria	Firmicutes	NA	NA	NA	Human (USA/Malawi/Venezuela)	TACGTAGGTGGCAAGCGTTGTCCGGAATTACTGGGTGTAAAGGGTGCGTAGGCGGCTTCTAAAGTCAGATGTGAAATACCGCAGCTCAACTGCGGGGCTG
ASV7763	712	0.700524	TRUE	TRUE	Venezuela (Rural)	d__Bacteria	Firmicutes	Oscillospirales	Ruminococcaceae	Anaerotruncus	Human (USA/Malawi/Venezuela)	TACGTAGGGAGCGAGCGTTGTCCGGAATTACTGGGTGTAAAGGGAGCGTAGGCGGGATGCCAAGTAGAATGTTAAATCCATCGGCTCAACTGGTGGCAGC
ASV7763	780	-0.865623	TRUE	TRUE	Malawi (Rural)	d__Bacteria	Firmicutes	Oscillospirales	Ruminococcaceae	Anaerotruncus	Human (USA/Malawi/Venezuela)	TACGTAGGGAGCGAGCGTTGTCCGGAATTACTGGGTGTAAAGGGAGCGTAGGCGGGATGCCAAGTAGAATGTTAAATCCATCGGCTCAACTGGTGGCAGC
ASV7802	505	-0.523135	TRUE	FALSE	Malawi (Rural)	d__Bacteria	Firmicutes	Lactobacillales	Leuconostocaceae	Leuconostoc	Human (USA/Malawi/Venezuela)	TACGTATGTCCCGAGCGTTATCCGGATTTATTGGGCGTAAAGCGAGCGCAGACGGTTGATTAAGTCTGATGTGAAAGCCCGGAGCTCAACTCCGGAAAGG
ASV7854	510	-0.637456	TRUE	FALSE	Malawi (Rural)	d__Bacteria	Firmicutes	Peptococcales	Peptococcaceae	uncultured	Human (USA/Malawi/Venezuela)	TACGTAGGGAGCAAGCGTTGTCCGGAATTACTGGGCGTAAAGGGCGCGTAGGTGGATGTTTAAGTCAGATGTGAAAACTCCGGGCTCAACTTGGAGAGTG
ASV7857	542	-0.399579	TRUE	FALSE	Malawi (Rural)	d__Bacteria	Firmicutes	Oscillospirales	UCG-010	UCG-010	Human (USA/Malawi/Venezuela)	TACGTAGGTGGCGAGCGTTATCCGGAATTACTGGGCGTAAAGGGTGTGTAGGCGGGACTGCAAGTCAGATGTGAAAATTACGGGCTCAACTCGTAAAGTG
ASV7927	739	-0.464261	TRUE	TRUE	Malawi (Rural)	d__Bacteria	Firmicutes	Lachnospirales	Lachnospiraceae	Lachnospiraceae_UCG-003	Human (USA/Malawi/Venezuela)	TACGTAGGGGGCAAGCGTTATCCGGATTTACTGGGTGTAAAGGGAGCGTAGATGGCATGGCAAGTCTGAAGTGAAAGCCCGGGGCTTAACCCCGGGACTG
ASV7942	471	0.101392	TRUE	FALSE	USA (Urban)	d__Bacteria	Firmicutes	Christensenellales	Christensenellaceae	Christensenellaceae_R-7_group	Human (USA/Malawi/Venezuela)	TACGTAGGGAGCGAGCGTTGTCCGGAATTACTGGGTGTAAAGGGTGCGTAGGCGGTCTGAAAAGTCGGATGTGAAATCCCCGTGCTTAACATGGGAGCTG
ASV7947	801	0.538092	TRUE	TRUE	USA (Urban)	d__Bacteria	Firmicutes	Oscillospirales	Ruminococcaceae	Negativibacillus	Human (USA/Malawi/Venezuela)	TACGTAGGTGGCAAGCGTTGTCCGGAATTACTGGGTGTAAAGGGAGCGTAGGCGGGGAGGCAAGTTGAATGTCTAAACTATCGGCTCAACTGATAGTCGC
ASV7947	763	-0.544858	TRUE	TRUE	USA (Urban)	d__Bacteria	Firmicutes	Oscillospirales	Ruminococcaceae	Negativibacillus	Human (USA/Malawi/Venezuela)	TACGTAGGTGGCAAGCGTTGTCCGGAATTACTGGGTGTAAAGGGAGCGTAGGCGGGGAGGCAAGTTGAATGTCTAAACTATCGGCTCAACTGATAGTCGC
ASV7975	758	0.495526	TRUE	TRUE	USA (Urban)	d__Bacteria	Bacteroidota	Bacteroidales	Rikenellaceae	Alistipes	Human (USA/Malawi/Venezuela)	TACGGAGGATCCAAGCGTTATCCGGATTTATTGGGTTTAAAGGGTGCGTAGGCGGTTTTATAAGTTAGAGGTTAAATATCGGAGCTTAACTCCGTTATGC
ASV7975	722	-0.117883	TRUE	TRUE	USA (Urban)	d__Bacteria	Bacteroidota	Bacteroidales	Rikenellaceae	Alistipes	Human (USA/Malawi/Venezuela)	TACGGAGGATCCAAGCGTTATCCGGATTTATTGGGTTTAAAGGGTGCGTAGGCGGTTTTATAAGTTAGAGGTTAAATATCGGAGCTTAACTCCGTTATGC
ASV7980	715	0.0490763	TRUE	TRUE	USA (Urban)	d__Bacteria	Bacteroidota	Bacteroidales	Barnesiellaceae	Barnesiella	Human (USA/Malawi/Venezuela)	TACGGAGGATGCAAGCGTTATCCGGATTTATTGGGTTTAAAGGGTGCGTAGGCGGCACGCCAAGTCAGCGGTGAAATTTCCGGGCTCAACCCGGACTGTG
ASV7980	700	-0.442716	TRUE	TRUE	USA (Urban)	d__Bacteria	Bacteroidota	Bacteroidales	Barnesiellaceae	Barnesiella	Human (USA/Malawi/Venezuela)	TACGGAGGATGCAAGCGTTATCCGGATTTATTGGGTTTAAAGGGTGCGTAGGCGGCACGCCAAGTCAGCGGTGAAATTTCCGGGCTCAACCCGGACTGTG
ASV8097	807	1.25265	TRUE	TRUE	USA (Urban)	d__Bacteria	Firmicutes	Erysipelotrichales	Erysipelatoclostridiaceae	UCG-004	Human (USA/Malawi/Venezuela)	TACGTAGGTGGCAAGCGTTATCCGGAATTATTGGGCGTAAAGAGTGAGCAGGCGGTTATTTAAGTCTGAAGTCAAAGGCTATGGCTCAACCATAGTTCGC
ASV8184	515	-0.414535	TRUE	FALSE	Malawi (Rural)	d__Bacteria	Firmicutes	Clostridia_vadinBB60_group	Clostridia_vadinBB60_group	Clostridia_vadinBB60_group	Human (USA/Malawi/Venezuela)	TACGTAGGTGGCAAGCGTTGTCCGGAATGACTGGGCGTAAAGGGTGCGTAGGTGGCTATTCAAGTTAGTAGTGAAATCCCGGGGCTCAACTCCGGTGCTA
ASV823	436	0.371275	TRUE	FALSE	Venezuela (Rural)	d__Bacteria	Firmicutes	Lachnospirales	Lachnospiraceae	Anaerostipes	Human (USA/Malawi/Venezuela)	TACGTAGGGGCAAGCGTTATCCGGAATTACTGGGTGTAAAGGGTGCGTAGGTGGTATGGCAAGTCAGAAGTGAAAACCCAGGGCTTAACTCTGGGACTGC
ASV823	565	-0.195816	TRUE	FALSE	Malawi (Rural)	d__Bacteria	Firmicutes	Lachnospirales	Lachnospiraceae	Anaerostipes	Human (USA/Malawi/Venezuela)	TACGTAGGGGCAAGCGTTATCCGGAATTACTGGGTGTAAAGGGTGCGTAGGTGGTATGGCAAGTCAGAAGTGAAAACCCAGGGCTTAACTCTGGGACTGC
ASV8262	815	-0.616106	TRUE	TRUE	Malawi (Rural)	d__Bacteria	Firmicutes	Oscillospirales	Oscillospiraceae	UCG-002	Human (USA/Malawi/Venezuela)	TACGTAGGTGGCAAGCGTTGTCCGGATTTACTGGGTGTAAAGGGCGTGTAGCCGGGTCGGCAAGTCAGATGTGAAATCCACGGGCTTAACTCGTGAACTG
ASV8331	510	-0.474314	TRUE	FALSE	Malawi (Rural)	d__Bacteria	Firmicutes	Lactobacillales	Leuconostocaceae	Leuconostoc	Human (USA/Malawi/Venezuela)	TACGTATGTCCCGAGCGTTATCCGGATTTATTGGGCGTAAAGCGAGCGCAGACGGTTTATTAAGTCTGATGTGAAAGCCCGGAGCTCAACTCCGGAATGG
ASV8336	603	-0.874014	TRUE	FALSE	Malawi (Rural)	d__Bacteria	Firmicutes	Peptostreptococcales-Tissierellales	Peptostreptococcales-Tissierellales	Peptoniphilus	Human (USA/Malawi/Venezuela)	TACGTAGGGGGCTAGCGTTGTCCGGAATCACTGGGCGTAAAGGGTTCGCAGGCGGCAATGCAAGTCAGATGTAAAAGGCAAAGGCTCAACCTTTGTAAGC
ASV8358	810	2.39202	TRUE	TRUE	USA (Urban)	d__Bacteria	Firmicutes	Monoglobales	Monoglobaceae	Monoglobus	Human (USA/Malawi/Venezuela)	TACGTAGGTGACAAGCGTTGTCCGGATTTACTGGGTGTAAAGGGCGCGTAGGCGGACTGTCAAGTCAGTCGTGAAATACCGGGGCTTAACCCCGGGGCTG
ASV8358	811	-2.05226	TRUE	TRUE	USA (Urban)	d__Bacteria	Firmicutes	Monoglobales	Monoglobaceae	Monoglobus	Human (USA/Malawi/Venezuela)	TACGTAGGTGACAAGCGTTGTCCGGATTTACTGGGTGTAAAGGGCGCGTAGGCGGACTGTCAAGTCAGTCGTGAAATACCGGGGCTTAACCCCGGGGCTG
ASV8720	725	-0.646736	TRUE	TRUE	Malawi (Rural)	d__Bacteria	Firmicutes	Lachnospirales	Lachnospiraceae	Lachnospiraceae_NK4A136_group	Human (USA/Malawi/Venezuela)	TACGTAGGGGGCAAGCGTTATCCGGATTTACTGGGTGTAAAGGGAGCGTAGACGGTTTTGCAAGTCTGAAGTGAAAGCCCGGGGCTTAACCCCGGGACTG
ASV8774	778	-0.0326019	TRUE	TRUE	Malawi (Rural)	d__Bacteria	Firmicutes	Oscillospirales	[Eubacterium]_coprostanoligenes_group	[Eubacterium]_coprostanoligenes_group	Human (USA/Malawi/Venezuela)	TACGTAGGATGCAAGCGTTATCCGGATTTACTGGGTGTAAAGGGAGCGCAGGCGGGACTTCAAGTTGGATGTGAAAGGTCAAGGCTTAACCTTGGCACTG
ASV8820	829	-2.94387	TRUE	TRUE	USA (Urban)	d__Bacteria	Firmicutes	Lachnospirales	Lachnospiraceae	Blautia	Human (USA/Malawi/Venezuela)	TACGTAGGGGGCAAGCGTTATCCGGATTTACTGGGTGTAAAGGGAGCGTAGACGGCGCAGCAAGTCTGATGTGAAAGGCAGGGGCTTAACCCCTGGACTG
ASV8820	829	2.32747	TRUE	TRUE	USA (Urban)	d__Bacteria	Firmicutes	Lachnospirales	Lachnospiraceae	Blautia	Human (USA/Malawi/Venezuela)	TACGTAGGGGGCAAGCGTTATCCGGATTTACTGGGTGTAAAGGGAGCGTAGACGGCGCAGCAAGTCTGATGTGAAAGGCAGGGGCTTAACCCCTGGACTG
ASV8841	828	1.05109	TRUE	TRUE	Venezuela (Rural)	d__Bacteria	Bacteroidota	Bacteroidales	Prevotellaceae	Alloprevotella	Human (USA/Malawi/Venezuela)	TACGGAAGGTCCAGGCGTTATCCGGATTTATTGGGTTTAAAGGGAGCGCAGGCGGCGGCGTAAGTCAGTTGTGAAATCGTGCGGCTTAACCGTGCAATTG
ASV8841	803	-0.969558	TRUE	TRUE	Malawi (Rural)	d__Bacteria	Bacteroidota	Bacteroidales	Prevotellaceae	Alloprevotella	Human (USA/Malawi/Venezuela)	TACGGAAGGTCCAGGCGTTATCCGGATTTATTGGGTTTAAAGGGAGCGCAGGCGGCGGCGTAAGTCAGTTGTGAAATCGTGCGGCTTAACCGTGCAATTG
ASV8842	797	1.4924	TRUE	TRUE	USA (Urban)	d__Bacteria	Firmicutes	Lachnospirales	Lachnospiraceae	[Eubacterium]_ventriosum_group	Human (USA/Malawi/Venezuela)	TACGTATGGGGCAAGCGTTATCCGGATTTACTGGGTGTAAAGGGAGCGTAGGCGGCATGGCAAGTCAGAAGTGAAAGCCTGGGGCTCAACCCCGGAATTG
ASV8842	764	-1.48241	TRUE	TRUE	USA (Urban)	d__Bacteria	Firmicutes	Lachnospirales	Lachnospiraceae	[Eubacterium]_ventriosum_group	Human (USA/Malawi/Venezuela)	TACGTATGGGGCAAGCGTTATCCGGATTTACTGGGTGTAAAGGGAGCGTAGGCGGCATGGCAAGTCAGAAGTGAAAGCCTGGGGCTCAACCCCGGAATTG
ASV885	816	0.317145	TRUE	TRUE	USA (Urban)	d__Bacteria	Firmicutes	Oscillospirales	Oscillospiraceae	UCG-005	Human (USA/Malawi/Venezuela)	TACGTAGGTTGCAAGCGTTGTCCGGAATTACTGGGTGTAAAGGGCGTGTAGGCGGAGCTGCAAGTCAGATGTGAAATCCCGGGGCTCAACCCCGGAACTG
ASV885	747	-0.387766	TRUE	TRUE	USA (Urban)	d__Bacteria	Firmicutes	Oscillospirales	Oscillospiraceae	UCG-005	Human (USA/Malawi/Venezuela)	TACGTAGGTTGCAAGCGTTGTCCGGAATTACTGGGTGTAAAGGGCGTGTAGGCGGAGCTGCAAGTCAGATGTGAAATCCCGGGGCTCAACCCCGGAACTG
ASV8893	789	-1.2776	TRUE	TRUE	USA (Urban)	d__Bacteria	Firmicutes	Oscillospirales	Ruminococcaceae	Candidatus_Soleaferrea	Human (USA/Malawi/Venezuela)	TACGTAGGTGGCAAGCGTTGTCCGGAATTACTGGGTGTAAAGGGAGAGTAGGCGGGATTGCAAGTCCGTTGTTAAATCTATCGGCTTAACCGGTAGCTGC
ASV8903	801	0.464773	TRUE	TRUE	USA (Urban)	d__Bacteria	Firmicutes	Lachnospirales	Lachnospiraceae	NA	Human (USA/Malawi/Venezuela)	TACGTAGGGGGCAAGCGTTATCCGGATTTACTGGGTGTAAAGGGAGCGTAGACGGTATGGCAAGTCTGAAGTGAAAACCCGCAGCTTAACTGTGGGACTG
ASV8945	483	-0.114881	TRUE	FALSE	Malawi (Rural)	d__Bacteria	Actinobacteriota	Coriobacteriales	uncultured	uncultured	Human (USA/Malawi/Venezuela)	TACGTAGGGAGCGAGCGTTATCCGGATTTATTGGGCGTAAAGCGCGCGTAGGCGGGCTATTAAGTCAGGTGTTAAAGCCCGGGGCTCAACCCCGGCCCGC
ASV9089	824	-0.954053	TRUE	TRUE	Malawi (Rural)	d__Bacteria	Firmicutes	Lachnospirales	Lachnospiraceae	Lachnospiraceae_NK4B4_group	Human (USA/Malawi/Venezuela)	TACGTAGGGGGCAAGCGTTATCCGGATTTACTGGGTGTAAAGGGAGCGCAGGCGGCAGGGCAAGTCAGATGTGAAATACTGGGGCTCAACCCCGGGACTG
ASV9134	564	-0.379579	TRUE	FALSE	Malawi (Rural)	d__Bacteria	Firmicutes	Eubacteriales	Anaerofustaceae	Anaerofustis	Human (USA/Malawi/Venezuela)	TACGTAGGGGGCAAGCGTTGTCCGGAATCACTGGGCGTAAAGAGCATGTAGGCGGTTATTTAAGTTAGGTGTGAAAGTTTTCGGCTCAACCGGGAAAGTG
ASV9134	448	0.374791	TRUE	FALSE	Venezuela (Rural)	d__Bacteria	Firmicutes	Eubacteriales	Anaerofustaceae	Anaerofustis	Human (USA/Malawi/Venezuela)	TACGTAGGGGGCAAGCGTTGTCCGGAATCACTGGGCGTAAAGAGCATGTAGGCGGTTATTTAAGTTAGGTGTGAAAGTTTTCGGCTCAACCGGGAAAGTG
ASV9168	786	-0.828957	TRUE	TRUE	USA (Urban)	d__Bacteria	Firmicutes	Lactobacillales	Streptococcaceae	Lactococcus	Human (USA/Malawi/Venezuela)	TACGTAGGTCCCAAGCGTTGTCCGGATTTATTGGGCGTAAAGCGAGCGCAGGTGGTTTCTTAAGTCTGATGTAAAAGGCAGTGGCTCAACCATTGTGTGC
ASV9175	529	-0.746688	TRUE	FALSE	Malawi (Rural)	d__Bacteria	Proteobacteria	Enterobacterales	Morganellaceae	Proteus	Human (USA/Malawi/Venezuela)	TACGGAGGGTGCAAGCGTTAATCGGAATTACTGGGCGTAAAGCGCACGCAGGCGGTCAATTAAGTCAGATGTGAAAGCCCCGAGCTTAACTTGGGAATTG
ASV9210	778	0.558601	TRUE	TRUE	USA (Urban)	d__Bacteria	Verrucomicrobiota	Victivallales	vadinBE97	vadinBE97	Human (USA/Malawi/Venezuela)	TACGTAGGTGGCGAGCGTTGTTCGGATTTATTGGGCGTAAAGGGTCCGCAGGGGGTTGATTAAGTCTGACGTGAAATCCCTGAGCTTAACTCAGGAACTG
ASV9210	752	-0.439053	TRUE	TRUE	USA (Urban)	d__Bacteria	Verrucomicrobiota	Victivallales	vadinBE97	vadinBE97	Human (USA/Malawi/Venezuela)	TACGTAGGTGGCGAGCGTTGTTCGGATTTATTGGGCGTAAAGGGTCCGCAGGGGGTTGATTAAGTCTGACGTGAAATCCCTGAGCTTAACTCAGGAACTG
ASV9215	701	-0.48476	TRUE	TRUE	Malawi (Rural)	d__Bacteria	Firmicutes	Oscillospirales	Oscillospiraceae	UCG-002	Human (USA/Malawi/Venezuela)	TACGTAGGTGGCAAGCGTTGTCCGGATTTACTGGGTGTAAAGGGCGTGCAGCCGGGAATGCAAGTCAGATGTGAAATCCATGGGCTTAACCCATGAACTG
ASV9215	754	1.91608	TRUE	TRUE	Venezuela (Rural)	d__Bacteria	Firmicutes	Oscillospirales	Oscillospiraceae	UCG-002	Human (USA/Malawi/Venezuela)	TACGTAGGTGGCAAGCGTTGTCCGGATTTACTGGGTGTAAAGGGCGTGCAGCCGGGAATGCAAGTCAGATGTGAAATCCATGGGCTTAACCCATGAACTG
ASV9408	521	0.234176	TRUE	FALSE	USA (Urban)	d__Bacteria	Firmicutes	Oscillospirales	Ruminococcaceae	NA	Human (USA/Malawi/Venezuela)	AACGTAGGTGGCAAGCGTTGTCCGGAATTACTGGGTGTAAAGGGAGCGCAGGCGGGAGAGCAAGTTGGAAGTGAAATCTGTGGGCTCAACTCACAAATTG
ASV943	802	0.662048	TRUE	TRUE	USA (Urban)	d__Bacteria	Bacteroidota	Bacteroidales	Marinifilaceae	Butyricimonas	Human (USA/Malawi/Venezuela)	CACGGGGGATGCGAGCGTTATCCGGATTTATTGGGTTTAAAGGGCGCGTAGGCGGGACGACAAGTCAGCGGTAAAAGACTGCAGCTAAACTGTAGCACGC
ASV9460	535	0.143958	TRUE	FALSE	USA (Urban)	d__Bacteria	Firmicutes	Clostridia_UCG-014	Clostridia_UCG-014	Clostridia_UCG-014	Human (USA/Malawi/Venezuela)	TACGTAGGGAGCGAGCGTTATCCGGATTTATTGGGTGTAAAGGGTGCGTAGACGGGAAATTAAGTTAGTTGTGAAATCCCTCGGCTTAACTGAGGAACTG
ASV9516	810	0.951953	TRUE	TRUE	USA (Urban)	d__Bacteria	Firmicutes	Christensenellales	Christensenellaceae	Christensenellaceae_R-7_group	Human (USA/Malawi/Venezuela)	TACGTAGGGGGCGAGCGTTGTCCGGAATTACTGGGCGTAAAGGGCGCGTAGGCGGTTGAATAAGTCTGTTGTGAAATTCCAAGGCTTAACTTTGGCAGTG
ASV9516	786	-0.590267	TRUE	TRUE	USA (Urban)	d__Bacteria	Firmicutes	Christensenellales	Christensenellaceae	Christensenellaceae_R-7_group	Human (USA/Malawi/Venezuela)	TACGTAGGGGGCGAGCGTTGTCCGGAATTACTGGGCGTAAAGGGCGCGTAGGCGGTTGAATAAGTCTGTTGTGAAATTCCAAGGCTTAACTTTGGCAGTG
ASV9632	862	4.86106	TRUE	TRUE	USA (Urban)	d__Bacteria	Bacteroidota	Bacteroidales	Bacteroidaceae	Bacteroides	Human (USA/Malawi/Venezuela)	TACGGAGGATCCGAGCGTTATCCGGATTTATTGGGTTTAAAGGGAGCGTAGGCGGACGCTTAAGTCAGTTGTGAAAGTTTGCGGCTCAACCGTAAAATTG
ASV9632	846	-3.91758	TRUE	TRUE	USA (Urban)	d__Bacteria	Bacteroidota	Bacteroidales	Bacteroidaceae	Bacteroides	Human (USA/Malawi/Venezuela)	TACGGAGGATCCGAGCGTTATCCGGATTTATTGGGTTTAAAGGGAGCGTAGGCGGACGCTTAAGTCAGTTGTGAAAGTTTGCGGCTCAACCGTAAAATTG
ASV9692	843	-1.29267	TRUE	TRUE	Malawi (Rural)	d__Bacteria	Firmicutes	Lachnospirales	Lachnospiraceae	Butyrivibrio	Human (USA/Malawi/Venezuela)	TACGTAGGGGGCAAGCGTTATCCGGATTTACTGGGTGTAAAGGGAGCGTAGACGGCATCACAAGTCAGAAGTGAAAATCCGGGGCTCAACCCCGGAACTG
ASV9692	761	1.20033	TRUE	TRUE	Venezuela (Rural)	d__Bacteria	Firmicutes	Lachnospirales	Lachnospiraceae	Butyrivibrio	Human (USA/Malawi/Venezuela)	TACGTAGGGGGCAAGCGTTATCCGGATTTACTGGGTGTAAAGGGAGCGTAGACGGCATCACAAGTCAGAAGTGAAAATCCGGGGCTCAACCCCGGAACTG
ASV9719	774	-0.808582	TRUE	TRUE	USA (Urban)	d__Bacteria	Firmicutes	Peptococcales	Peptococcaceae	uncultured	Human (USA/Malawi/Venezuela)	TACGTAGGGAGCAAGCGTTGTCCGGAATTACTGGGCGTAAAGGGCGCGTAGGCGGACGGATAAGTCAGATGTGAAATCTCCGGGCTCAACCTGGAGCGTG
ASV9719	791	1.34072	TRUE	TRUE	USA (Urban)	d__Bacteria	Firmicutes	Peptococcales	Peptococcaceae	uncultured	Human (USA/Malawi/Venezuela)	TACGTAGGGAGCAAGCGTTGTCCGGAATTACTGGGCGTAAAGGGCGCGTAGGCGGACGGATAAGTCAGATGTGAAATCTCCGGGCTCAACCTGGAGCGTG
ASV9778	845	-1.93004	TRUE	TRUE	USA (Urban)	d__Bacteria	Firmicutes	Oscillospirales	Oscillospiraceae	Oscillibacter	Human (USA/Malawi/Venezuela)	TACGTAGGTGGCAAGCGTTGTCCGGATTTACTGGGTGTAAAGGGCGTGCAGCCGGGCCGGCAAGTCAGATGTGAAATCTGGAGGCTTAACCTCCAAACTG
ASV9778	867	2.04058	TRUE	TRUE	USA (Urban)	d__Bacteria	Firmicutes	Oscillospirales	Oscillospiraceae	Oscillibacter	Human (USA/Malawi/Venezuela)	TACGTAGGTGGCAAGCGTTGTCCGGATTTACTGGGTGTAAAGGGCGTGCAGCCGGGCCGGCAAGTCAGATGTGAAATCTGGAGGCTTAACCTCCAAACTG
ASV980	490	0.0159132	TRUE	FALSE	USA (Urban)	d__Bacteria	Actinobacteriota	Coriobacteriales	Eggerthellaceae	Slackia	Human (USA/Malawi/Venezuela)	TACGTAGGGGGCGAGCGTTATCCGGATTCATTGGGCGTAAAGCGCGCGTAGGCGTCCCTTCAAGCGGCACCGTCGAAGCCGGGGGCTCAACCCCCGGAAG
ASV9822	801	0.805908	TRUE	TRUE	Venezuela (Rural)	d__Bacteria	Firmicutes	Lachnospirales	Lachnospiraceae	Lachnospiraceae_AC2044_group	Human (USA/Malawi/Venezuela)	TACGTAGGGGGCAAGCGTTATCCGGATTTACTGGGTGTAAAGGGAGCGTAGACGGCATGGCAAGTCTGAAGTGAAATGCGGGGGCTCAACCCCTGAACTG
ASV9822	832	-1.54313	TRUE	TRUE	Malawi (Rural)	d__Bacteria	Firmicutes	Lachnospirales	Lachnospiraceae	Lachnospiraceae_AC2044_group	Human (USA/Malawi/Venezuela)	TACGTAGGGGGCAAGCGTTATCCGGATTTACTGGGTGTAAAGGGAGCGTAGACGGCATGGCAAGTCTGAAGTGAAATGCGGGGGCTCAACCCCTGAACTG
ASV9847	440	0.337891	TRUE	FALSE	Venezuela (Rural)	d__Bacteria	Firmicutes	Lachnospirales	Lachnospiraceae	NA	Human (USA/Malawi/Venezuela)	TACGTAGGGGGCAAGCGTTATCCGGATTTACTGGGTGTAAAGGGAGCGTAGGTGGCATGGCAAGCCAGAAGTGAAAACCCGGGGCTTAACCCCGCGGATT
ASV9847	550	-0.339914	TRUE	FALSE	Malawi (Rural)	d__Bacteria	Firmicutes	Lachnospirales	Lachnospiraceae	NA	Human (USA/Malawi/Venezuela)	TACGTAGGGGGCAAGCGTTATCCGGATTTACTGGGTGTAAAGGGAGCGTAGGTGGCATGGCAAGCCAGAAGTGAAAACCCGGGGCTTAACCCCGCGGATT
ASV9880	840	1.1946	TRUE	TRUE	USA (Urban)	d__Bacteria	Firmicutes	Oscillospirales	Ruminococcaceae	UBA1819	Human (USA/Malawi/Venezuela)	AACGTAGGGTGCAAGCGTTGTCCGGAATTACTGGGTGTAAAGGGAGCGCAGGCGGATTGGCAAGTTGGGAGTGAAATCTATGGGCTCAACCCATAAATTG
ASV9880	787	-1.25176	TRUE	TRUE	USA (Urban)	d__Bacteria	Firmicutes	Oscillospirales	Ruminococcaceae	UBA1819	Human (USA/Malawi/Venezuela)	AACGTAGGGTGCAAGCGTTGTCCGGAATTACTGGGTGTAAAGGGAGCGCAGGCGGATTGGCAAGTTGGGAGTGAAATCTATGGGCTCAACCCATAAATTG
ASV998	514	-0.657791	TRUE	FALSE	Malawi (Rural)	d__Bacteria	Campilobacterota	Campylobacterales	Campylobacteraceae	Campylobacter	Human (USA/Malawi/Venezuela)	TACGGGGGGTGCAAGCGTTACTCGGAATCACTGGGCGTAAAGGACGCGTAGGCGGATTATCAAGTCTTTTGTGAAATCTAGTGGCTTAACCACTAAACTG
ASV998	430	0.540096	TRUE	FALSE	Venezuela (Rural)	d__Bacteria	Campilobacterota	Campylobacterales	Campylobacteraceae	Campylobacter	Human (USA/Malawi/Venezuela)	TACGGGGGGTGCAAGCGTTACTCGGAATCACTGGGCGTAAAGGACGCGTAGGCGGATTATCAAGTCTTTTGTGAAATCTAGTGGCTTAACCACTAAACTG
ASV9993	757	1.06351	TRUE	TRUE	USA (Urban)	d__Bacteria	Firmicutes	Lactobacillales	Enterococcaceae	Enterococcus	Human (USA/Malawi/Venezuela)	TACGTAGGTGGCAAGCGTTGTCCGGATTTATTGGGCGTAAAGCGAGCGCAGGCGGTTTCTTAAGTCTGATGTGAAAGCCCCCGGCTCAACCGGGGAGGGT
ASV9993	746	-0.172601	TRUE	TRUE	USA (Urban)	d__Bacteria	Firmicutes	Lactobacillales	Enterococcaceae	Enterococcus	Human (USA/Malawi/Venezuela)	TACGTAGGTGGCAAGCGTTGTCCGGATTTATTGGGCGTAAAGCGAGCGCAGGCGGTTTCTTAAGTCTGATGTGAAAGCCCCCGGCTCAACCGGGGAGGGT
