# Supplementary figures and images for: Humanization of wildlife gut microbiota in urban environments
Source: eLife journal article supplement (doi:10.7554/elife.76381), 2022-05-17

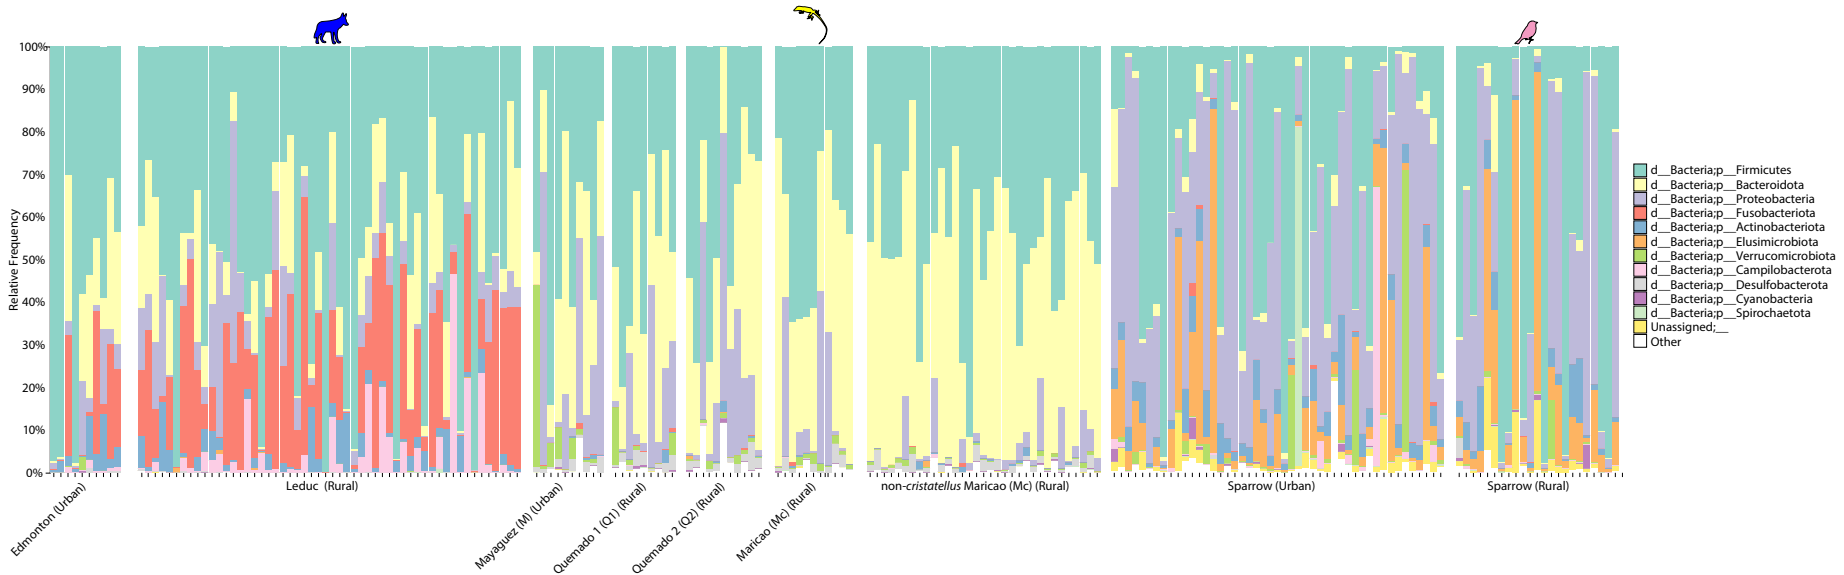

Supplement: supp [file elife-76381-supp-v1.zip]

A

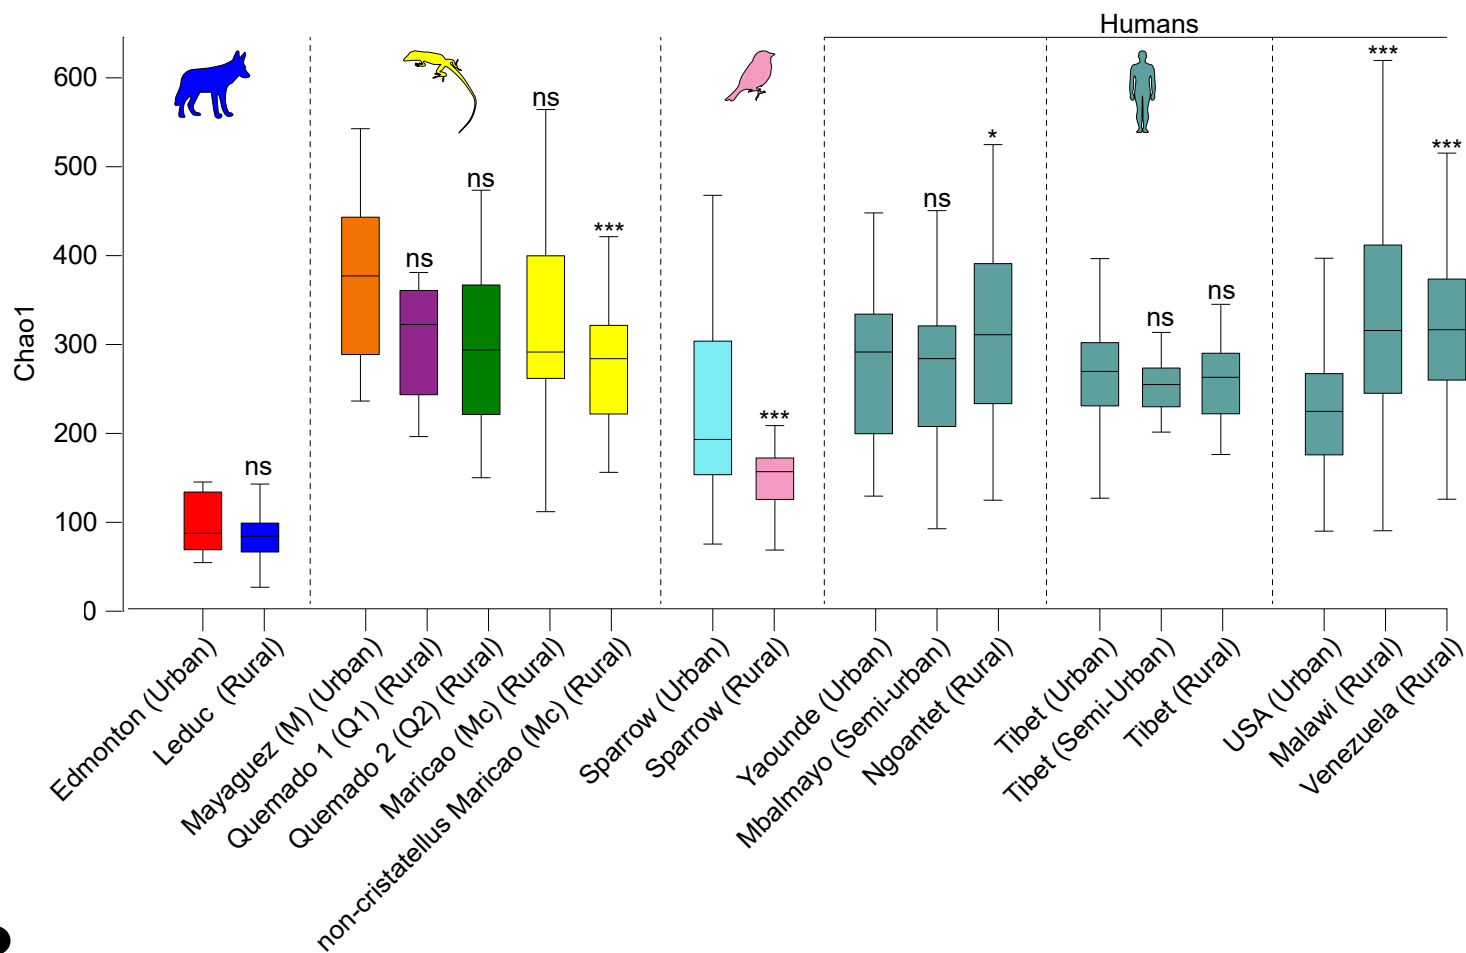

B

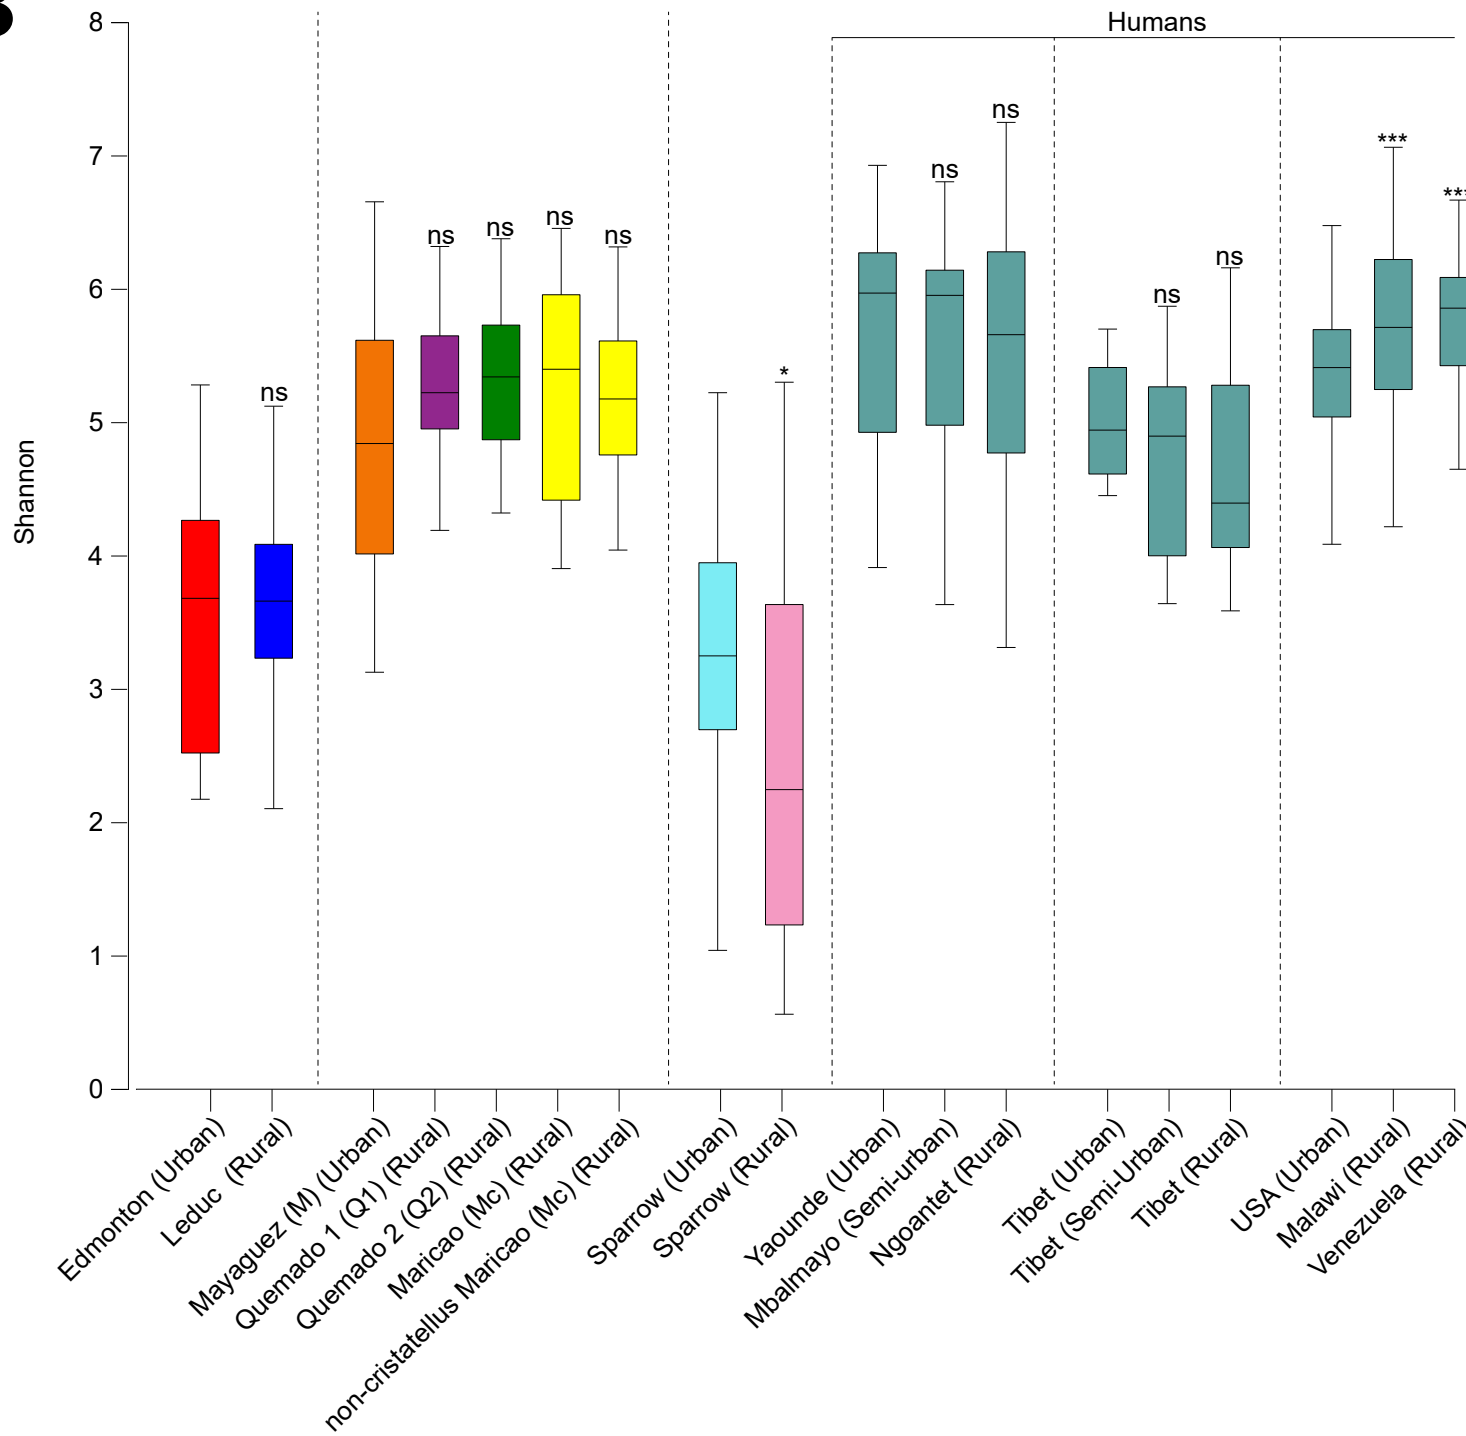

Supplement: supp [file elife-76381-supp-v1.zip]

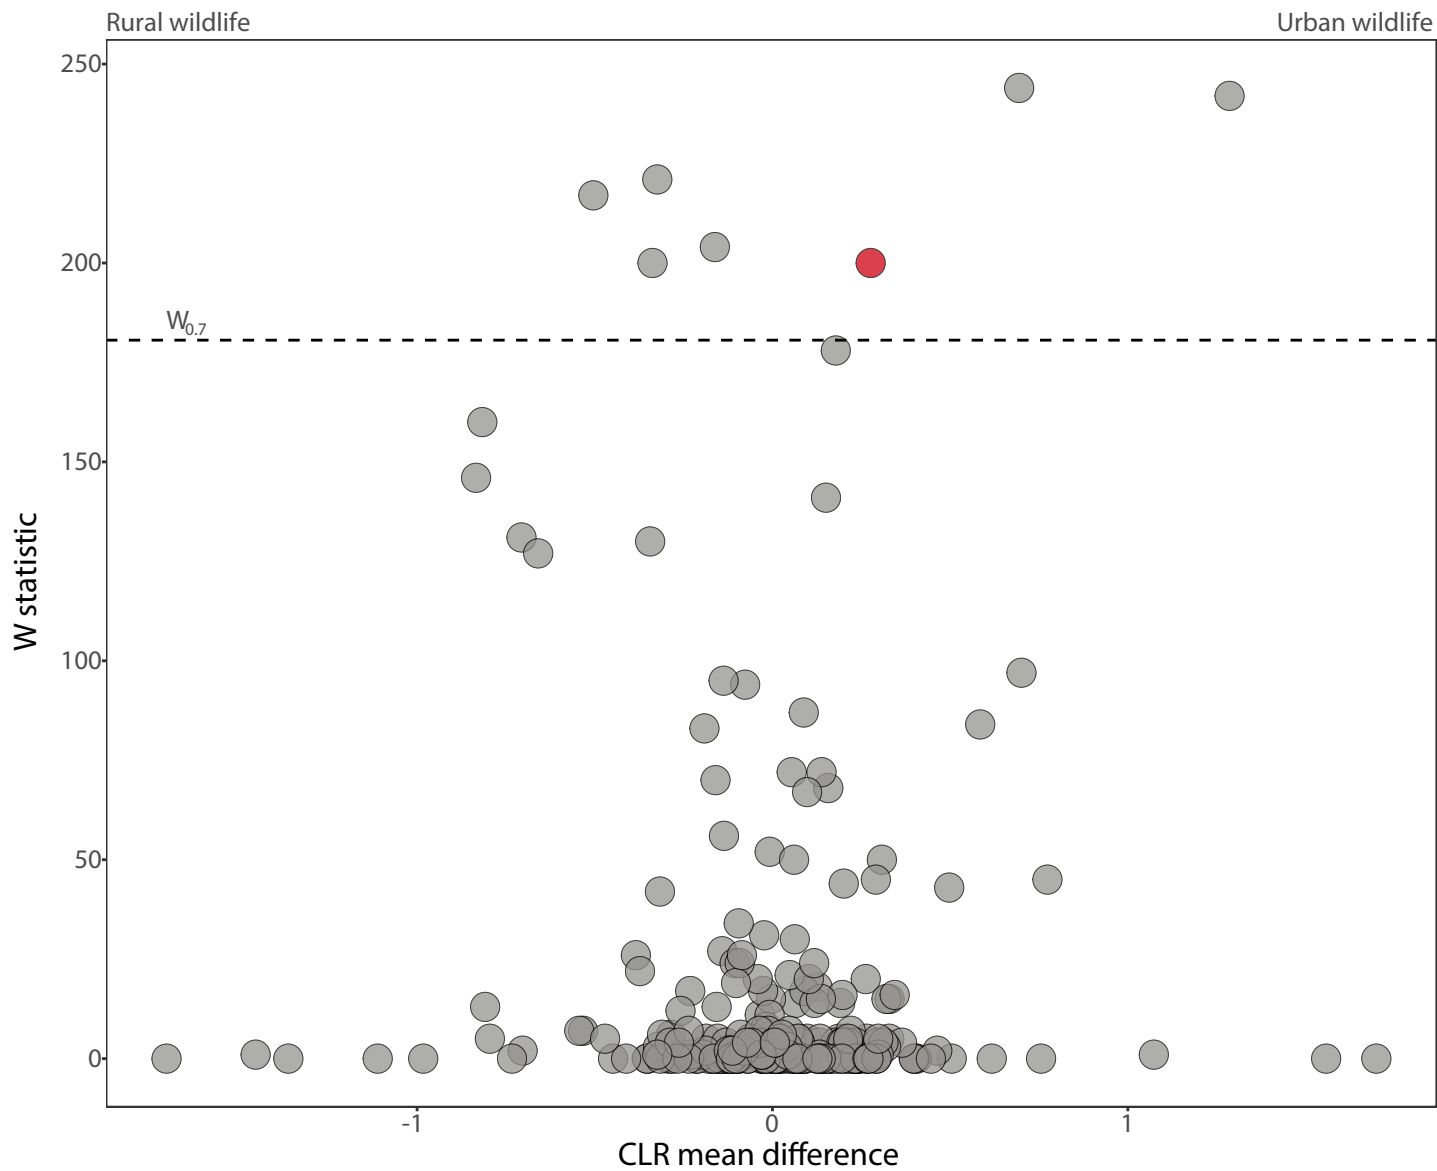

Supplement: supp [file elife-76381-supp-v1.zip]

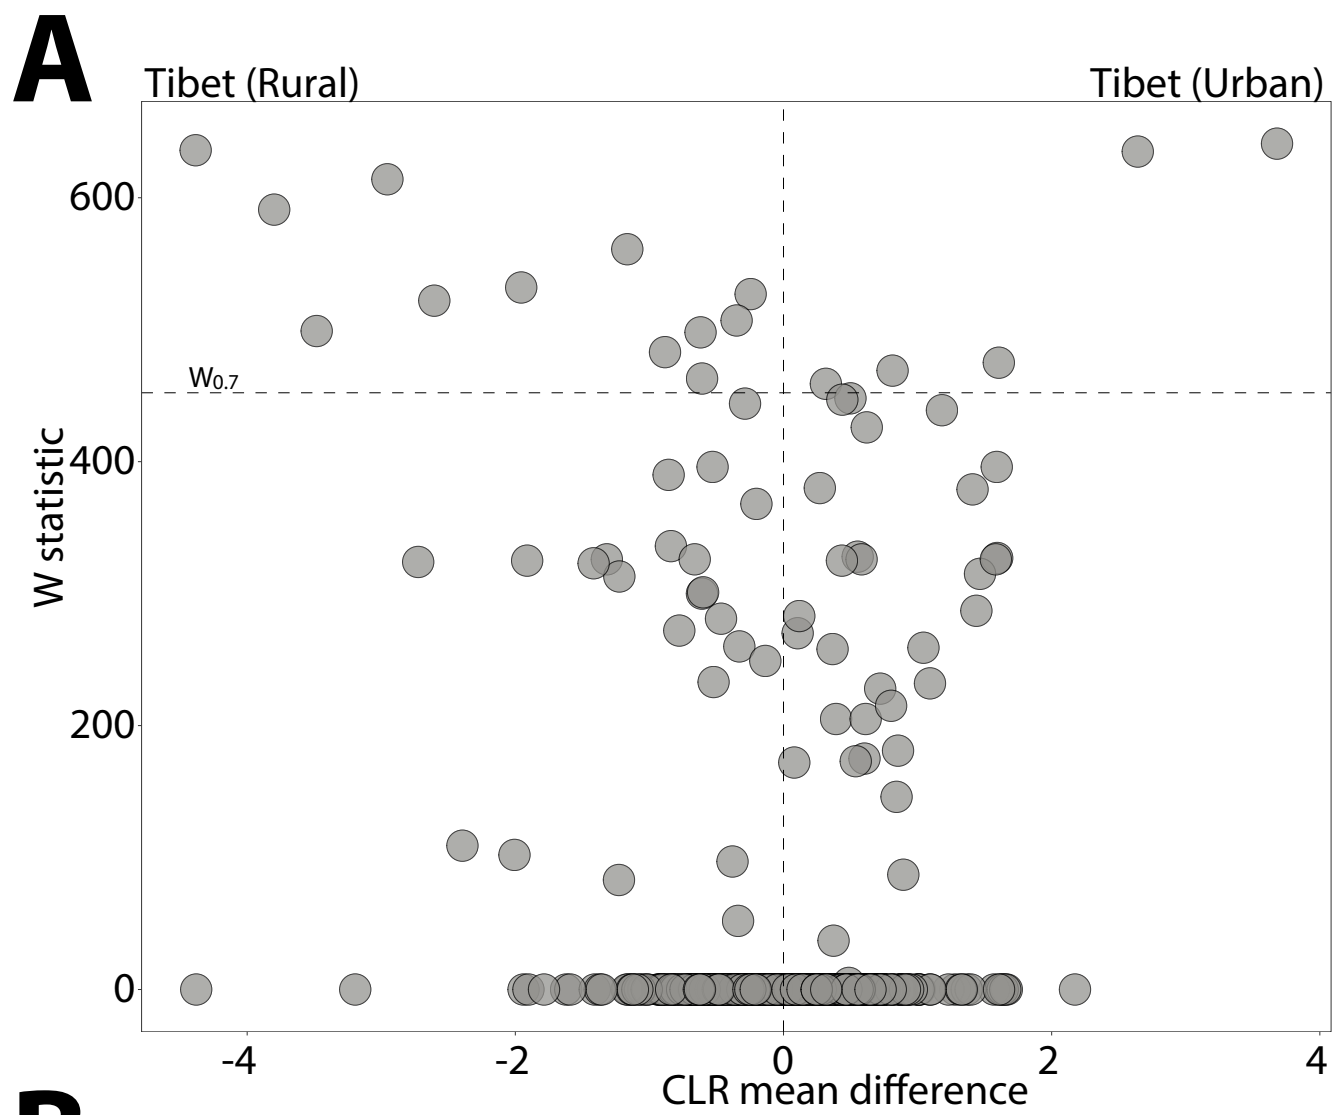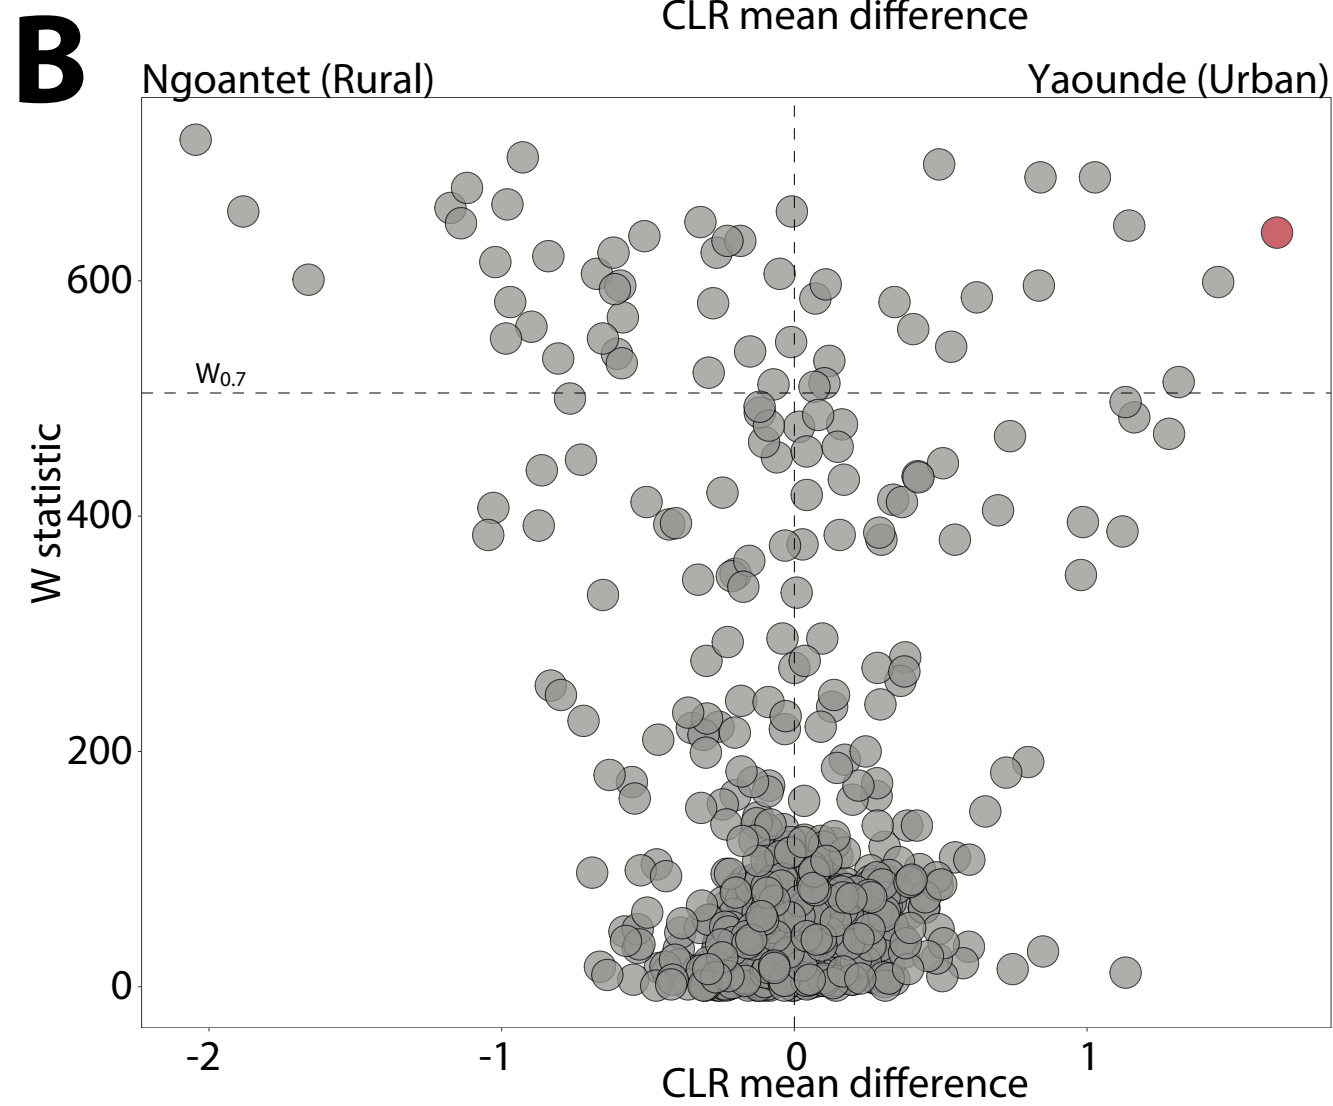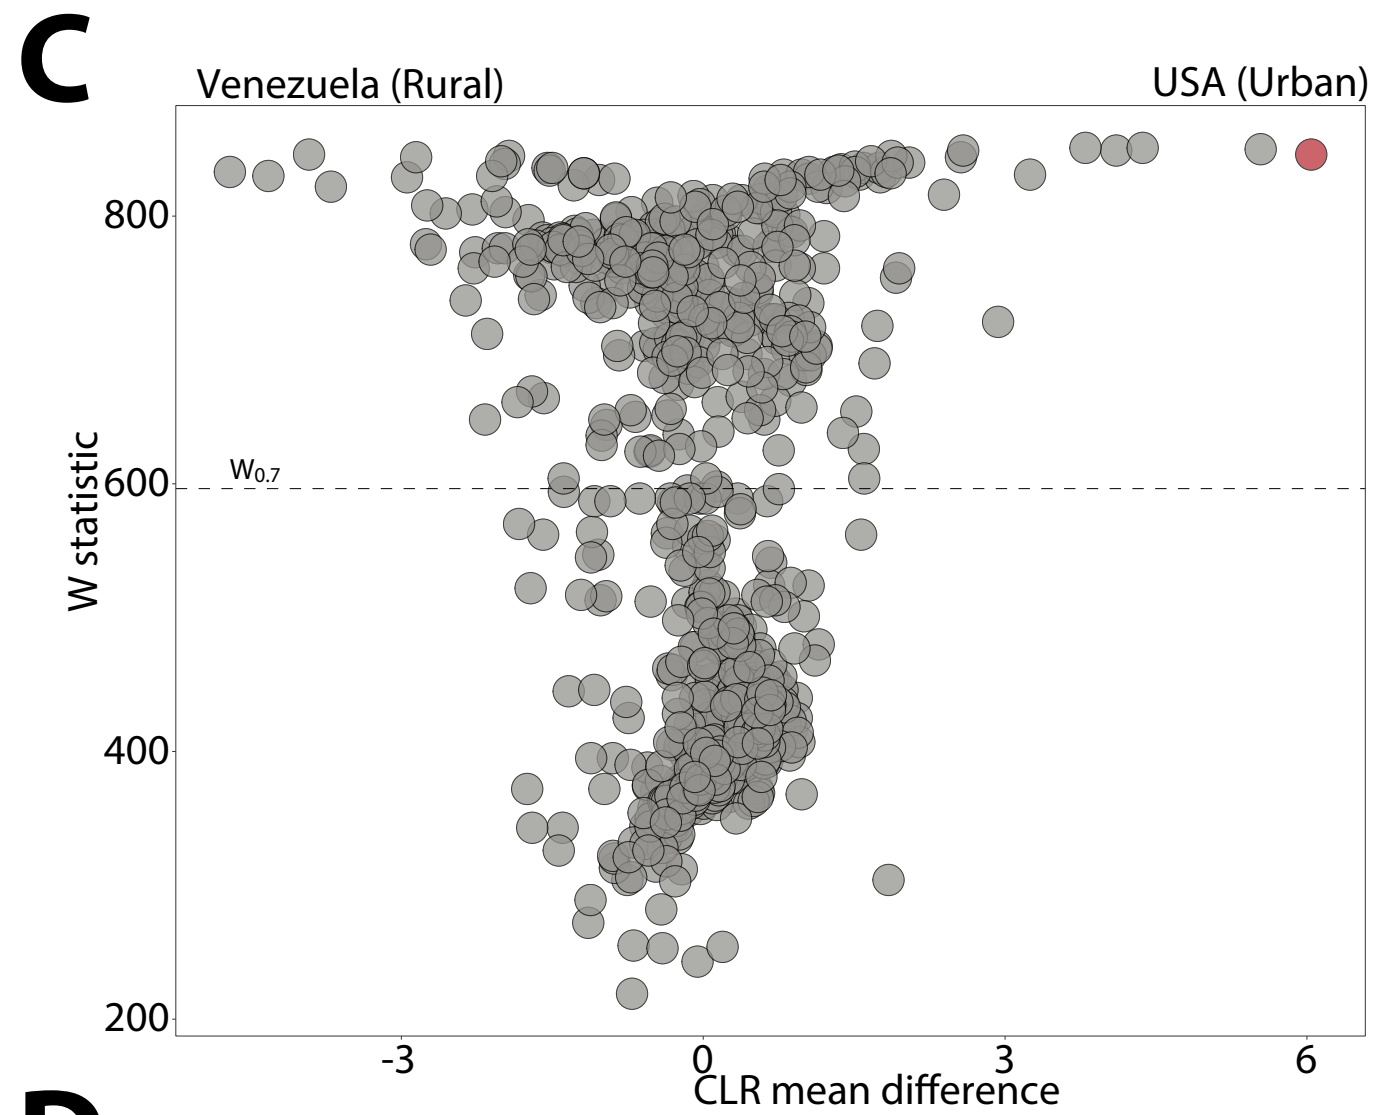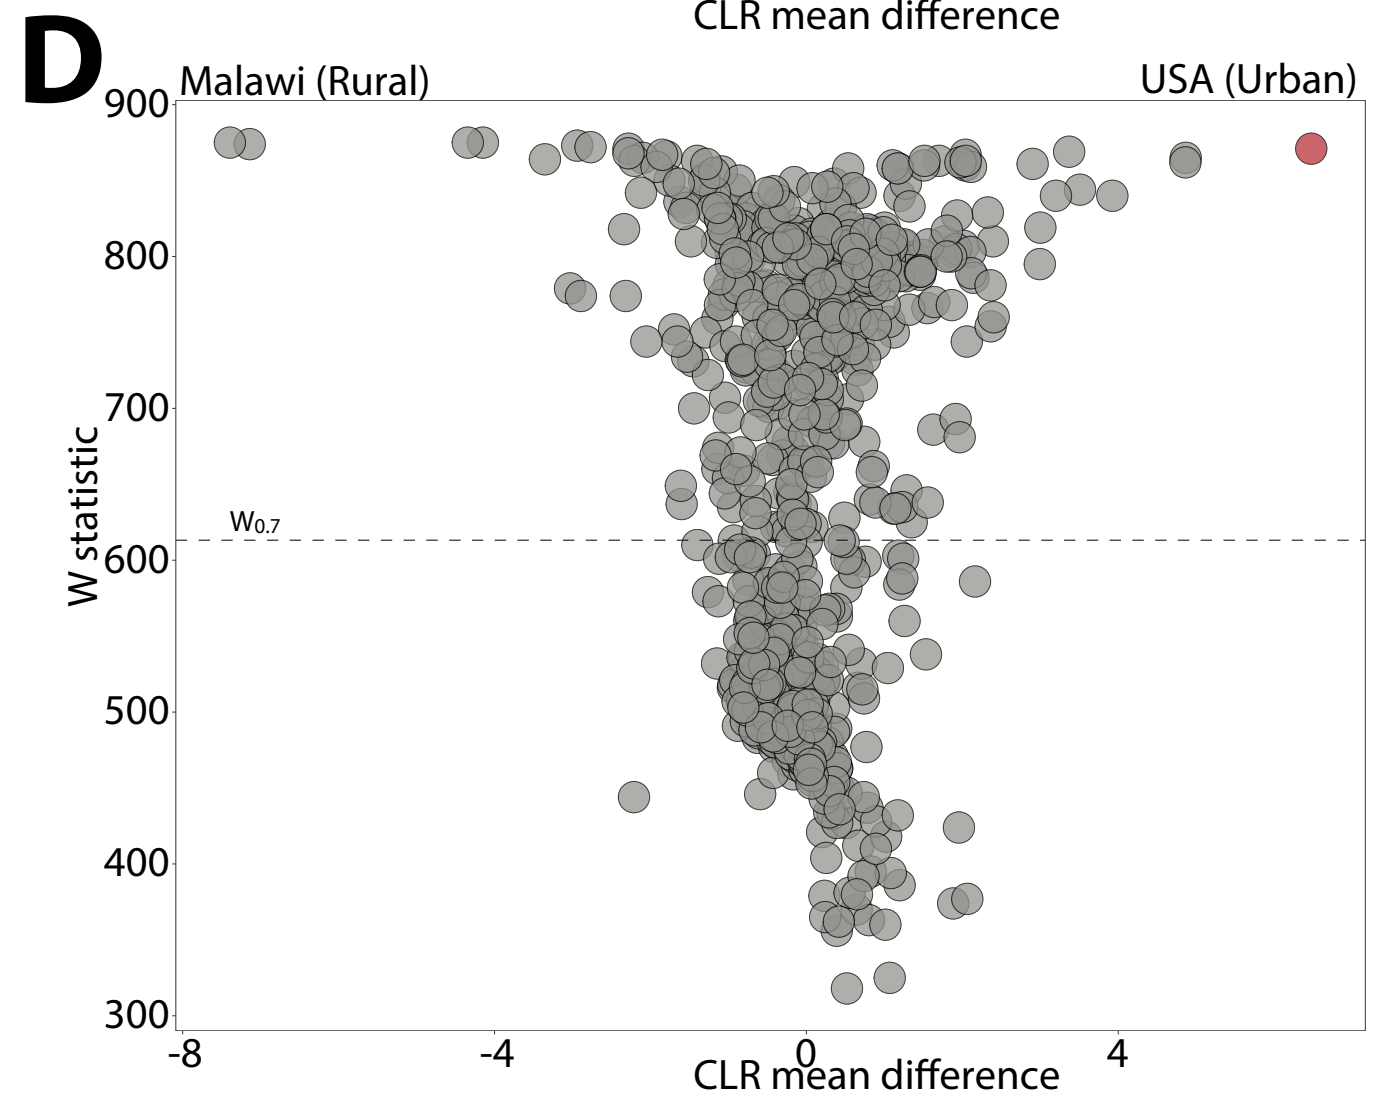

Supplement: supp [file elife-76381-supp-v1.zip]

**A**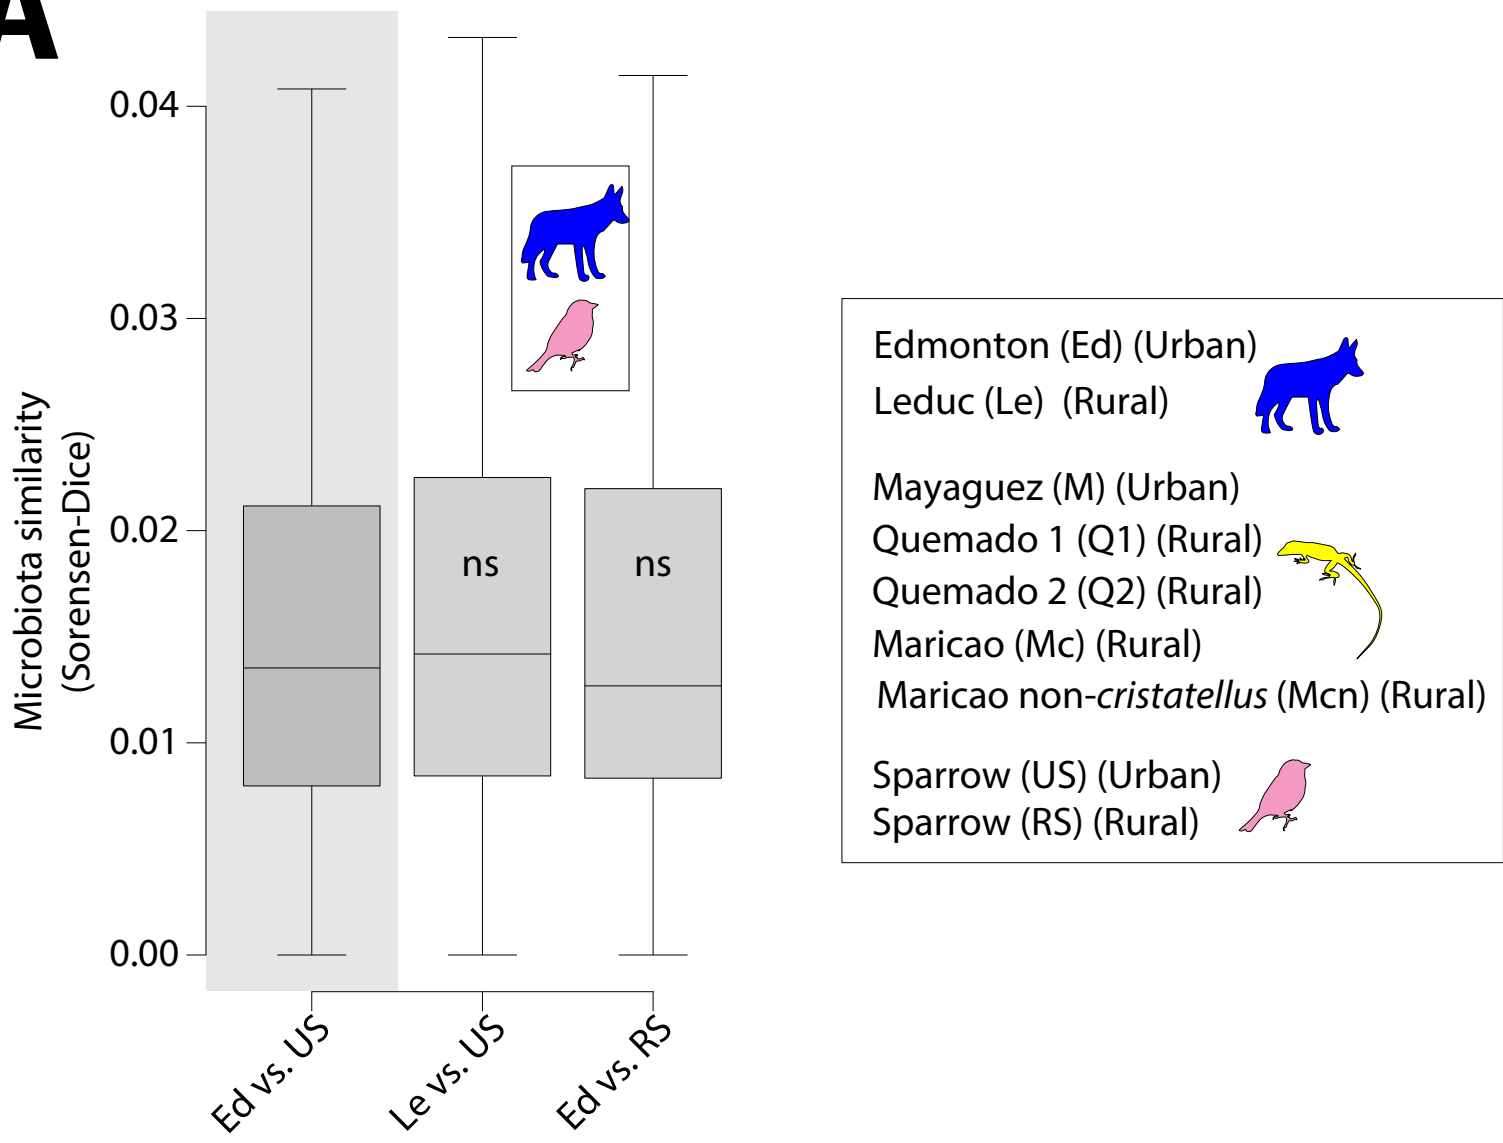**B**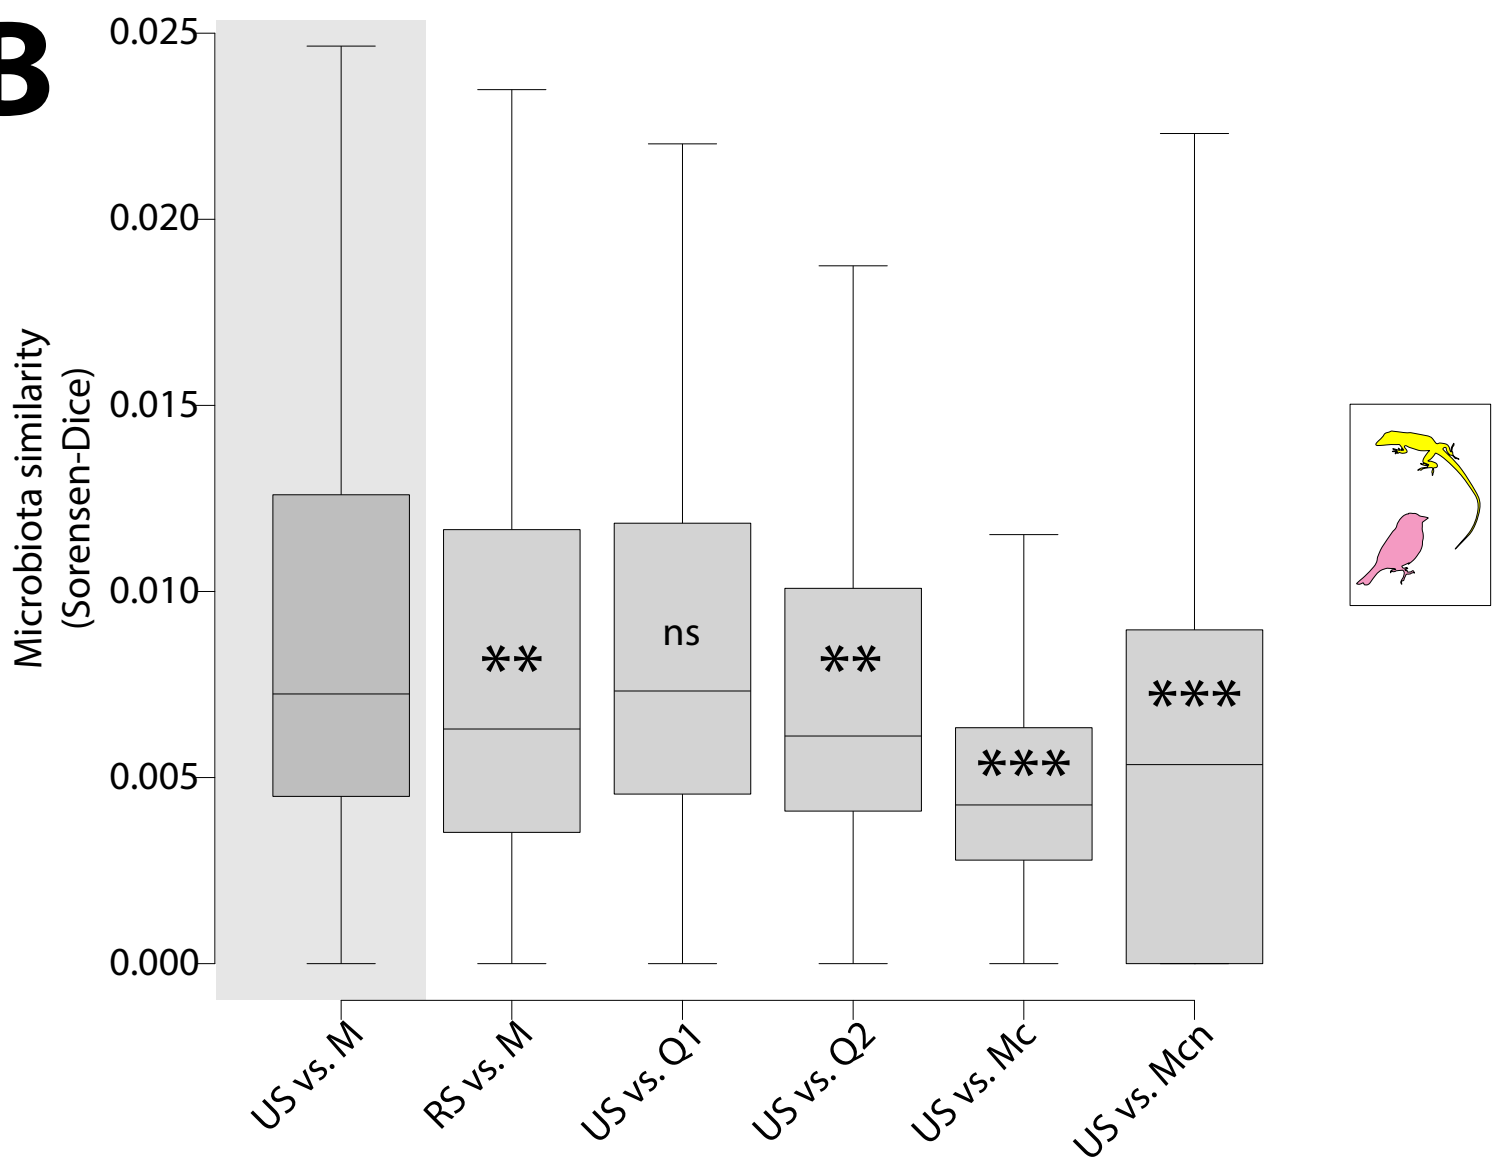**C**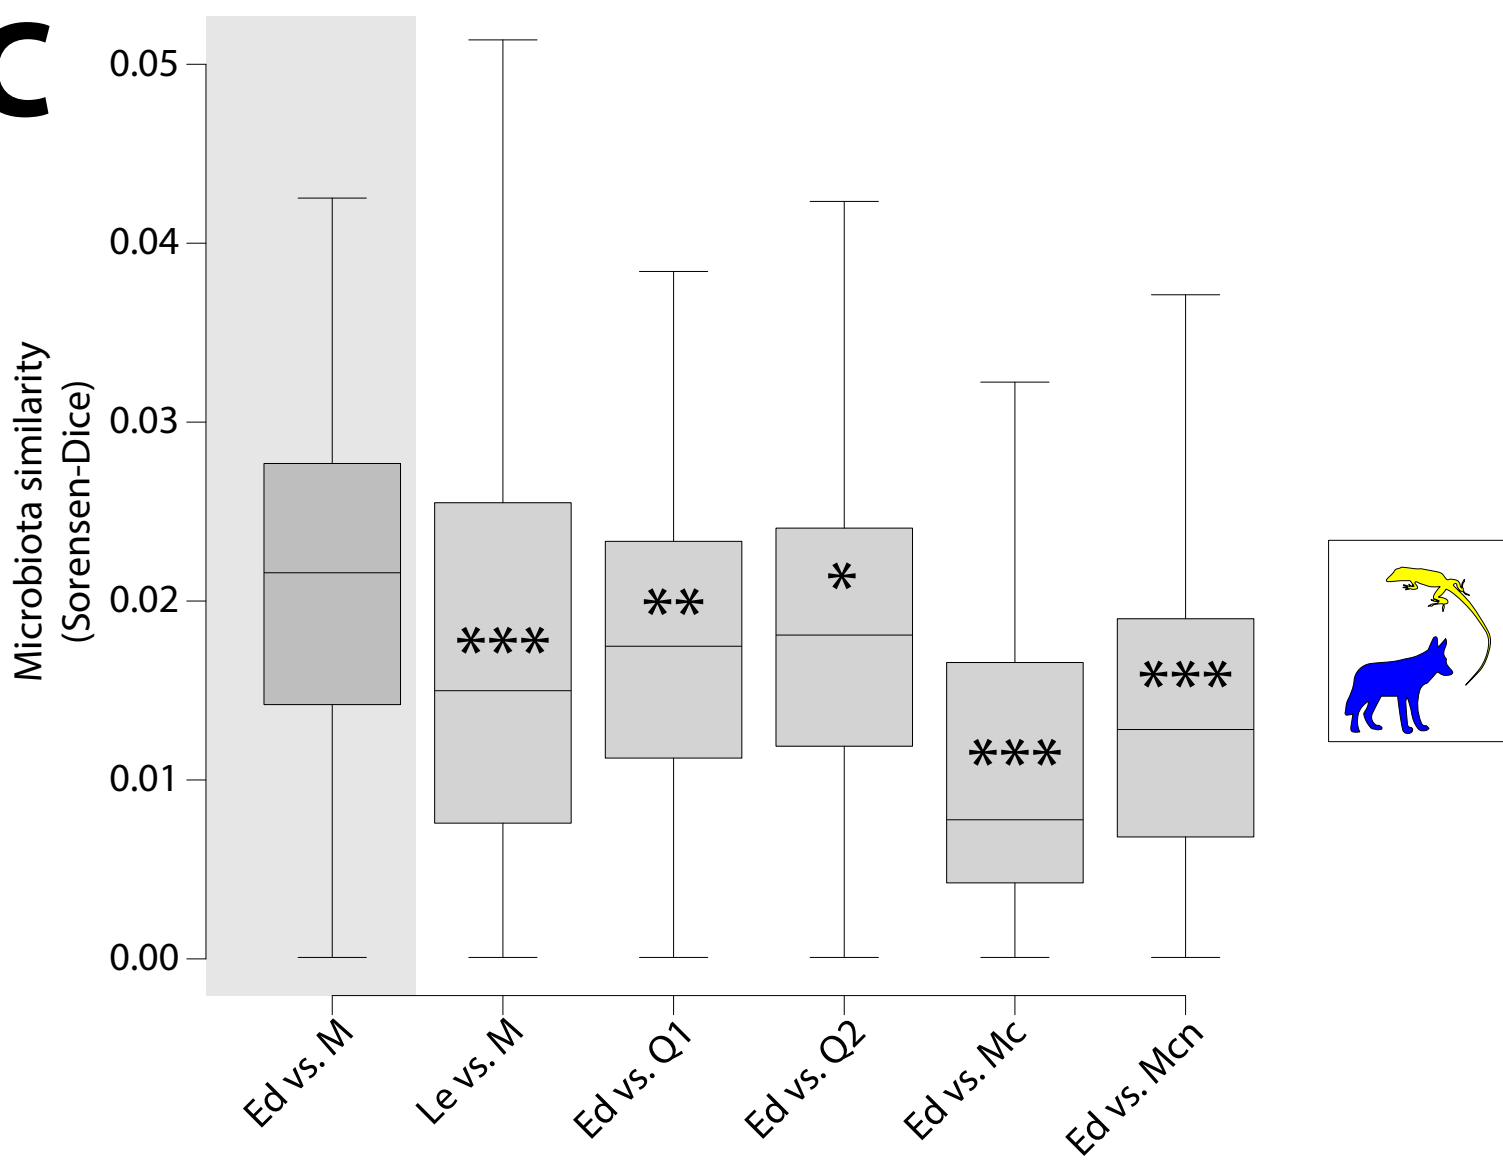

Supplement: supp [file elife-76381-supp-v1.zip]

**A**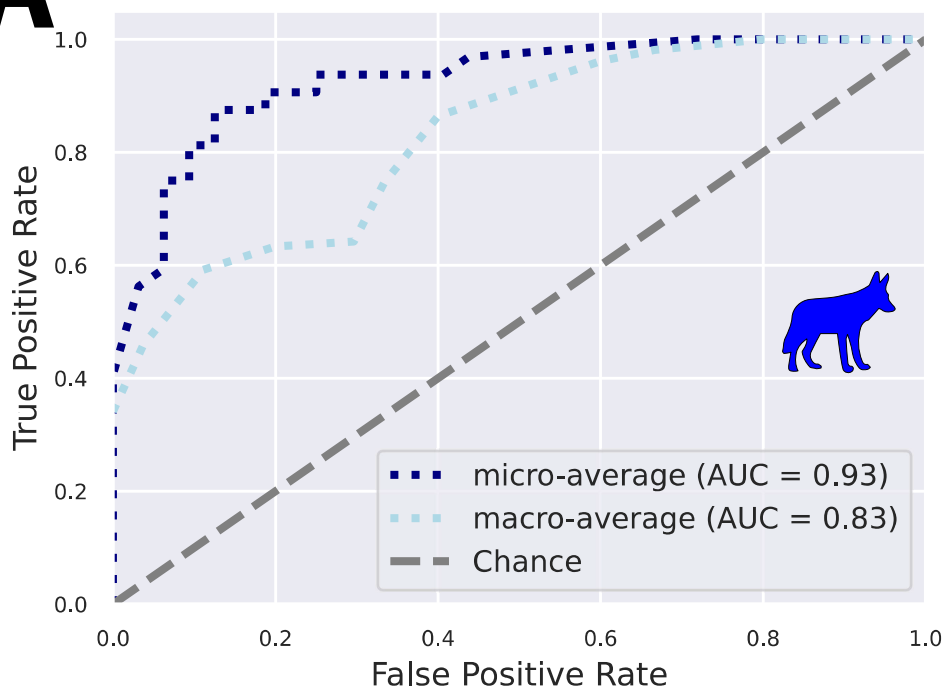**B**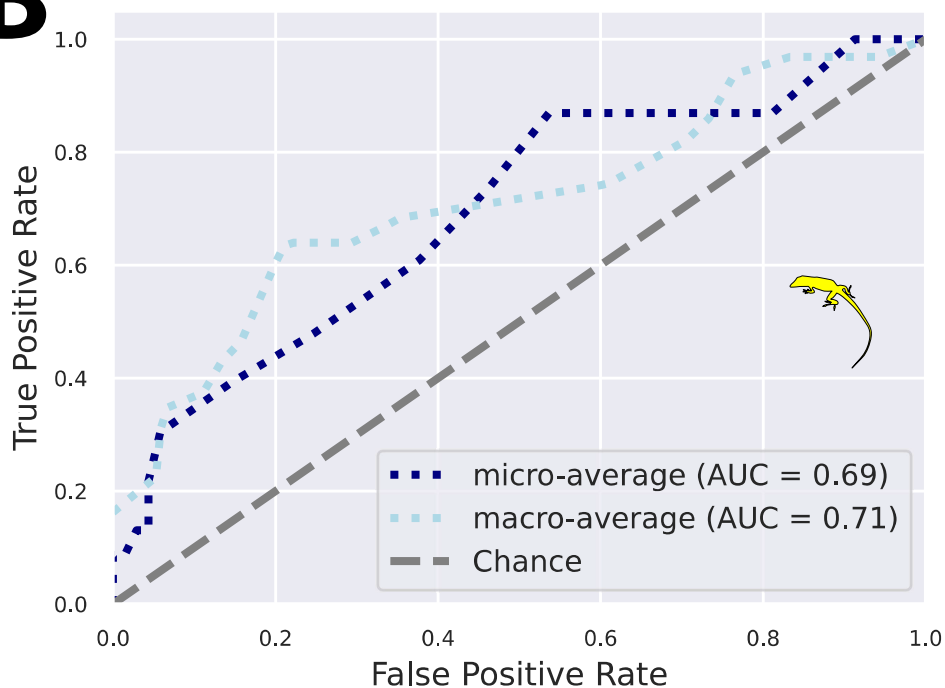**C**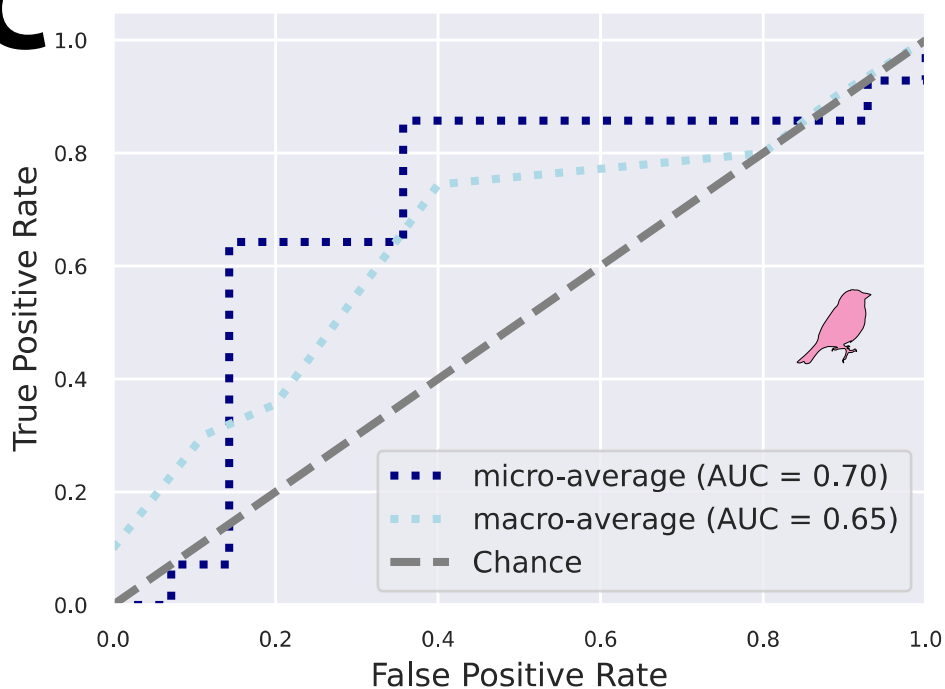**D**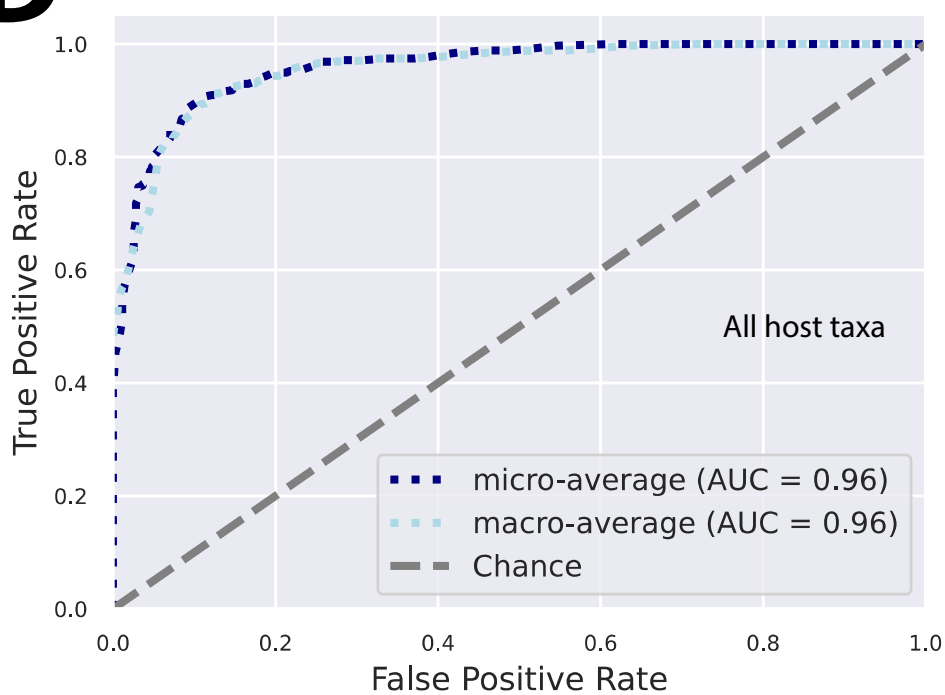

Supplement: supp [file elife-76381-supp-v1.zip]

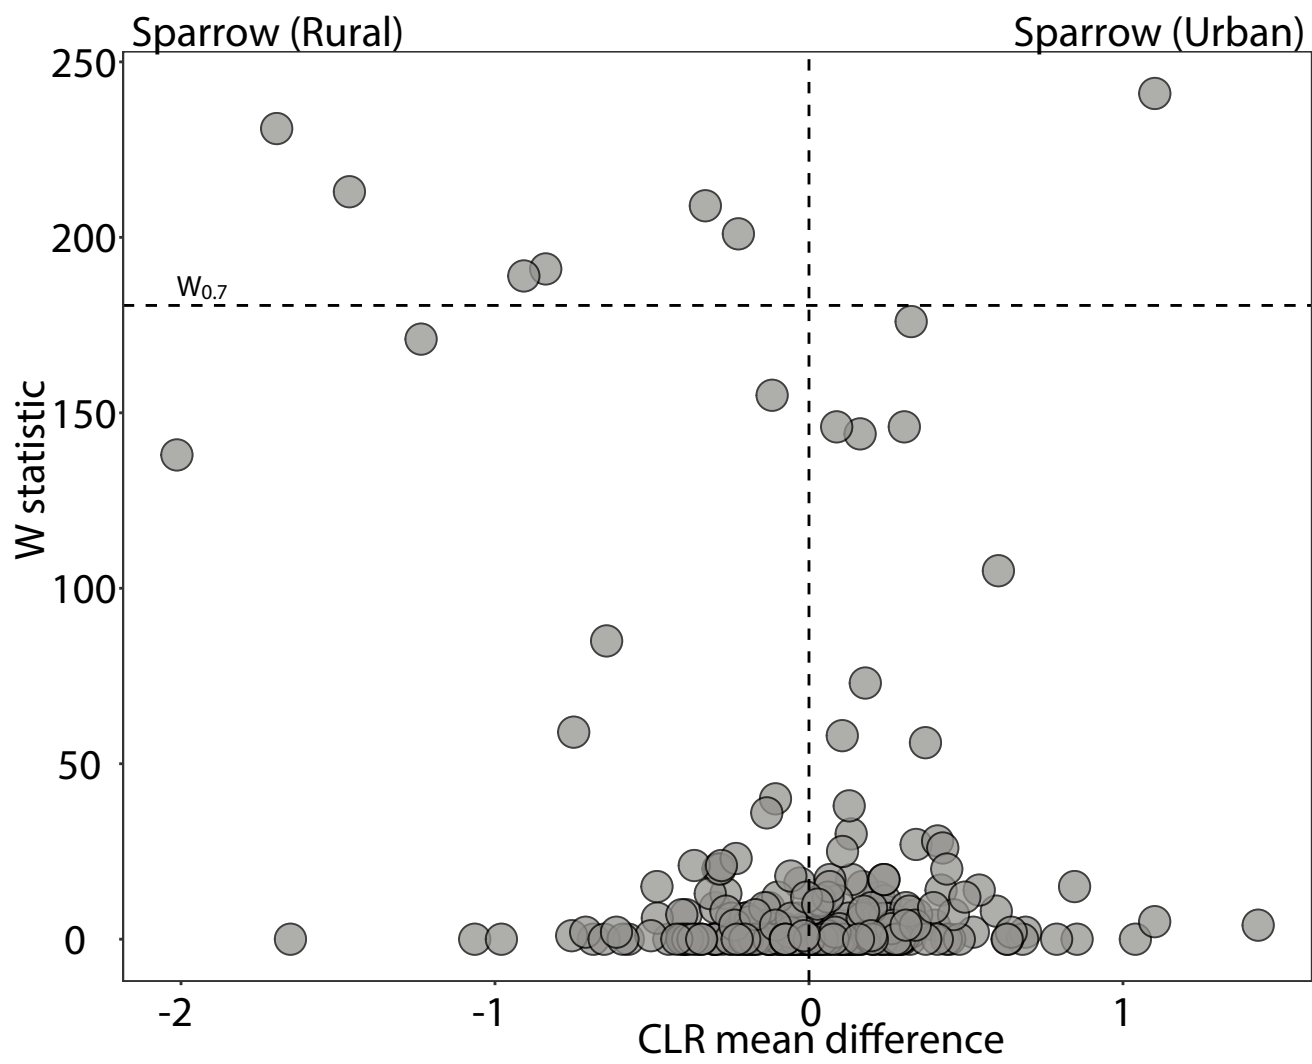

Supplement: supp [file elife-76381-supp-v1.zip]

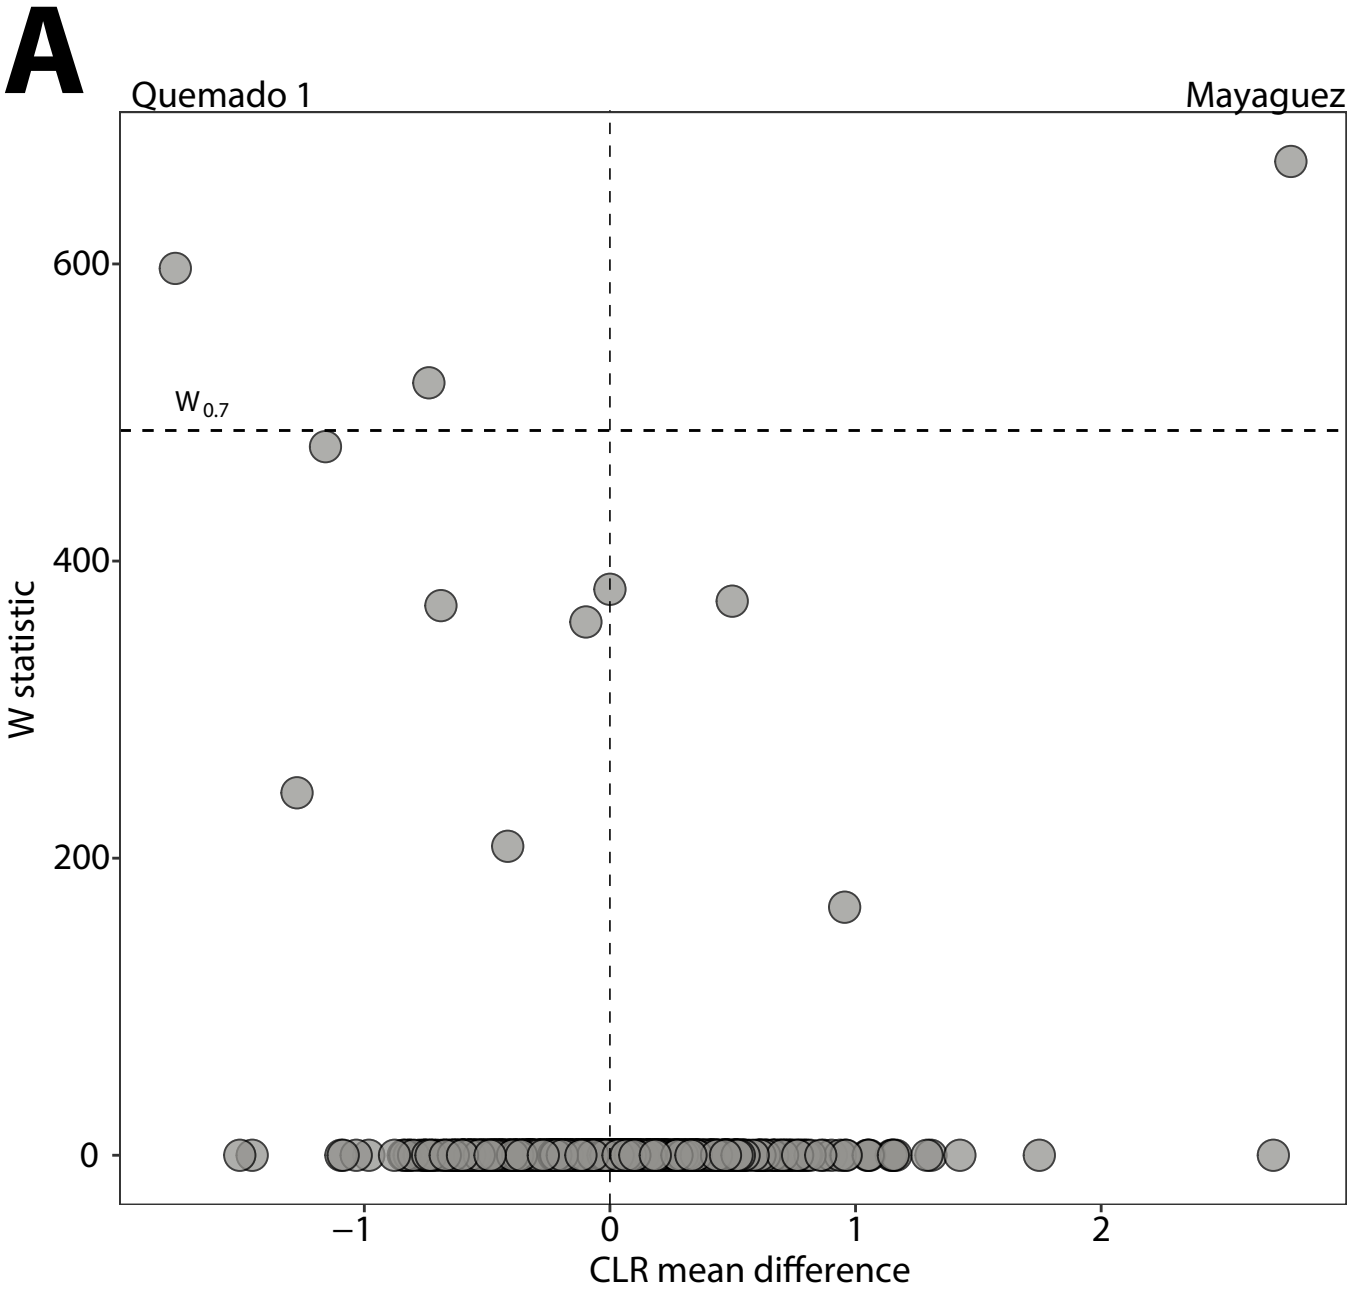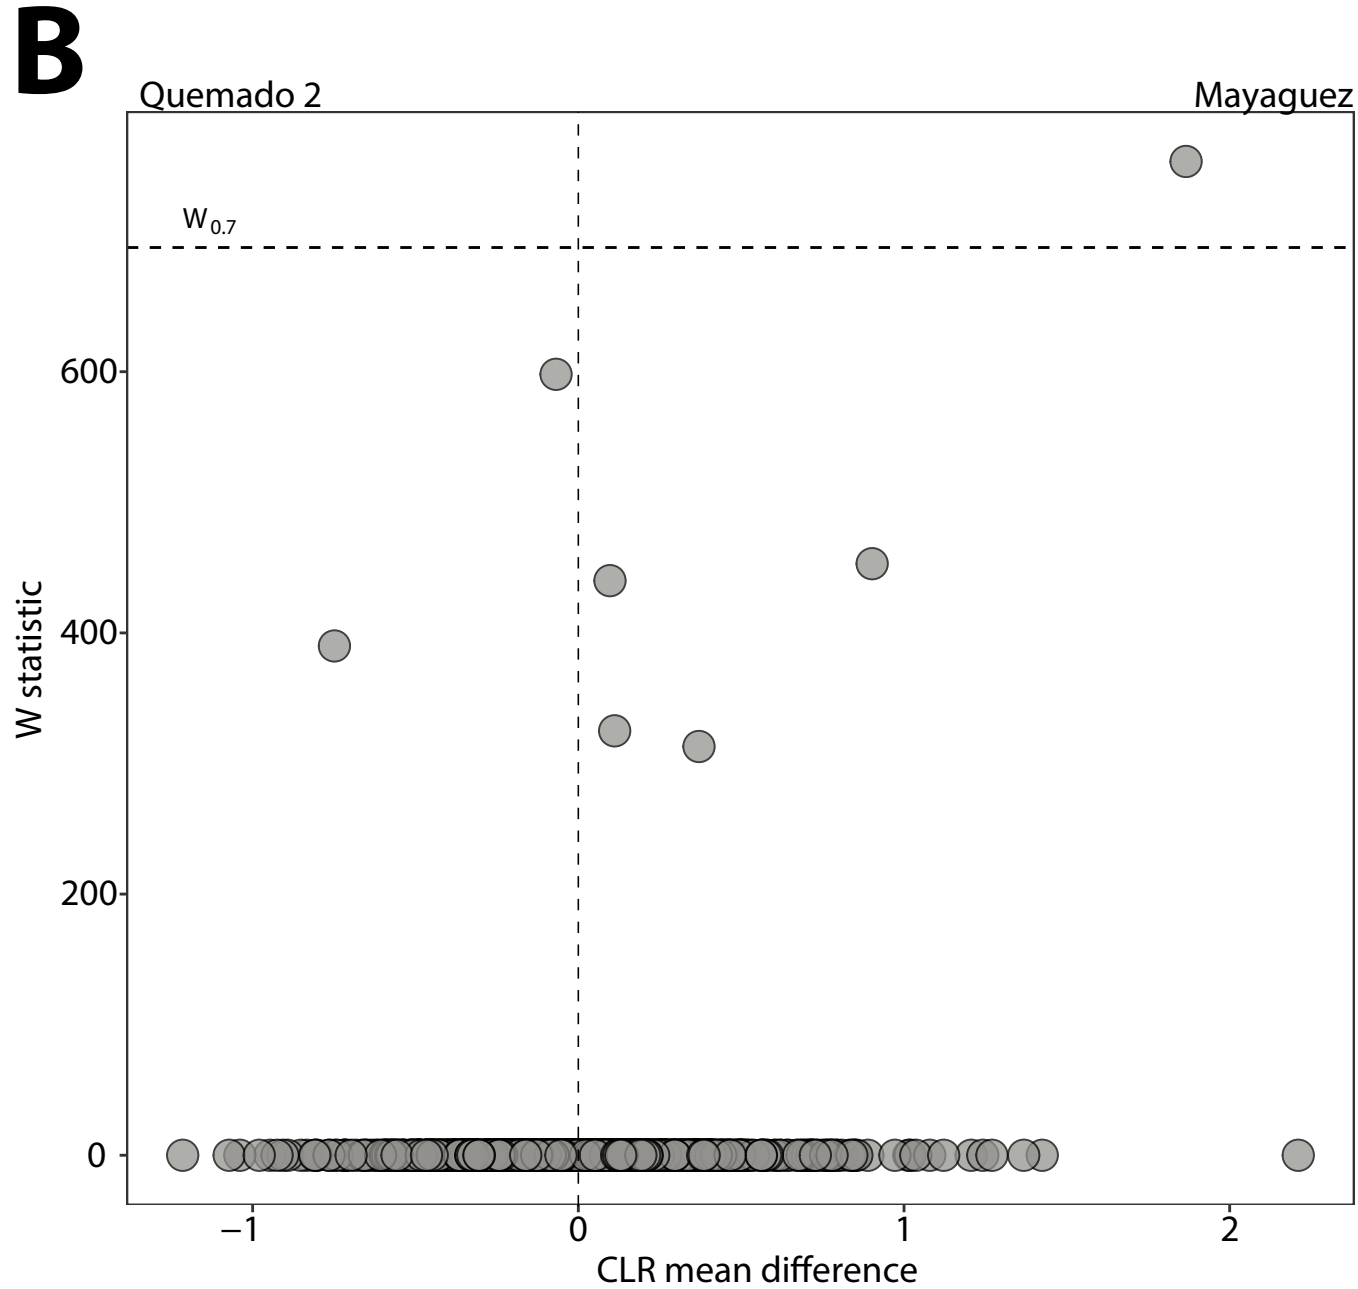

Supplement: supp [file elife-76381-supp-v1.zip]

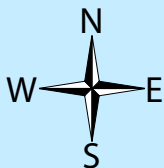

- ★ Mayaguez
- Quemado 1
- Quemado 2
- Maricao

5 miles

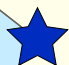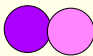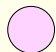

Supplement: supp [file elife-76381-supp-v1.zip]

**A**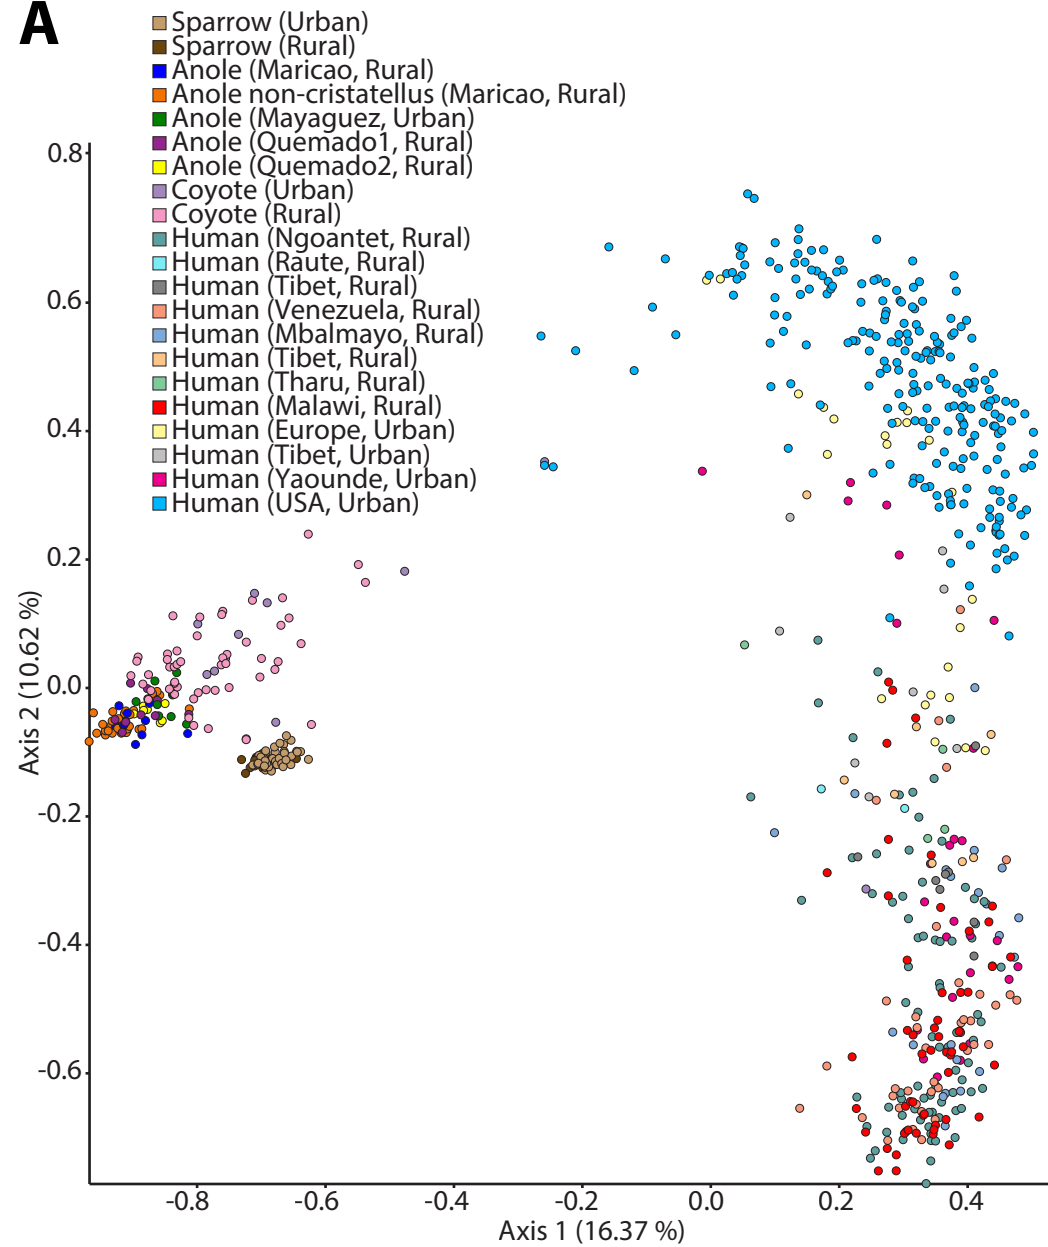**B**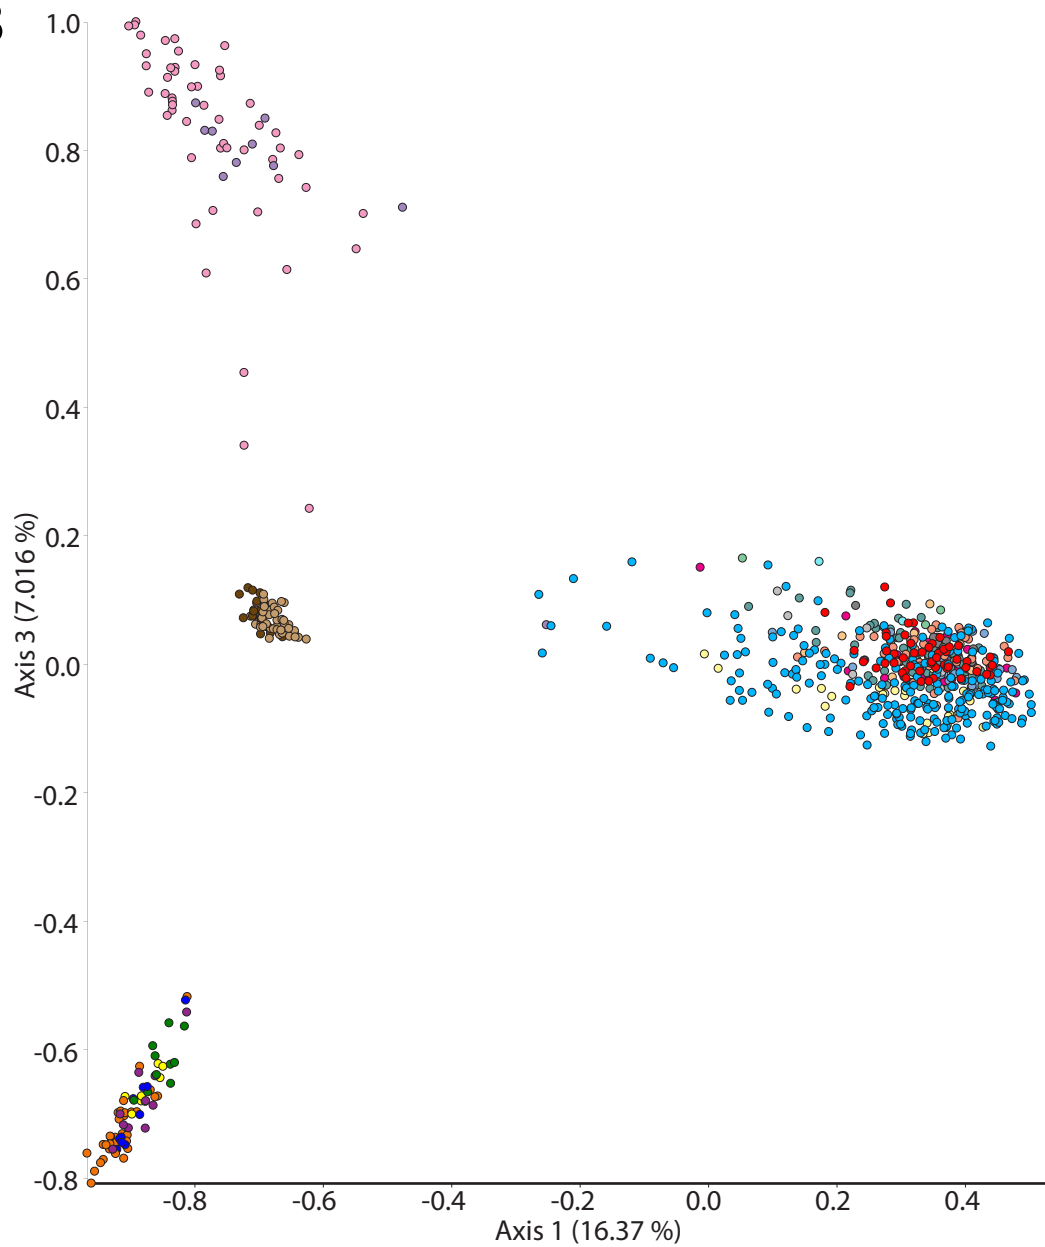

Supplement: supp [file elife-76381-supp-v1.zip]

Microbiota similarity within population (Sorensen-Dice)

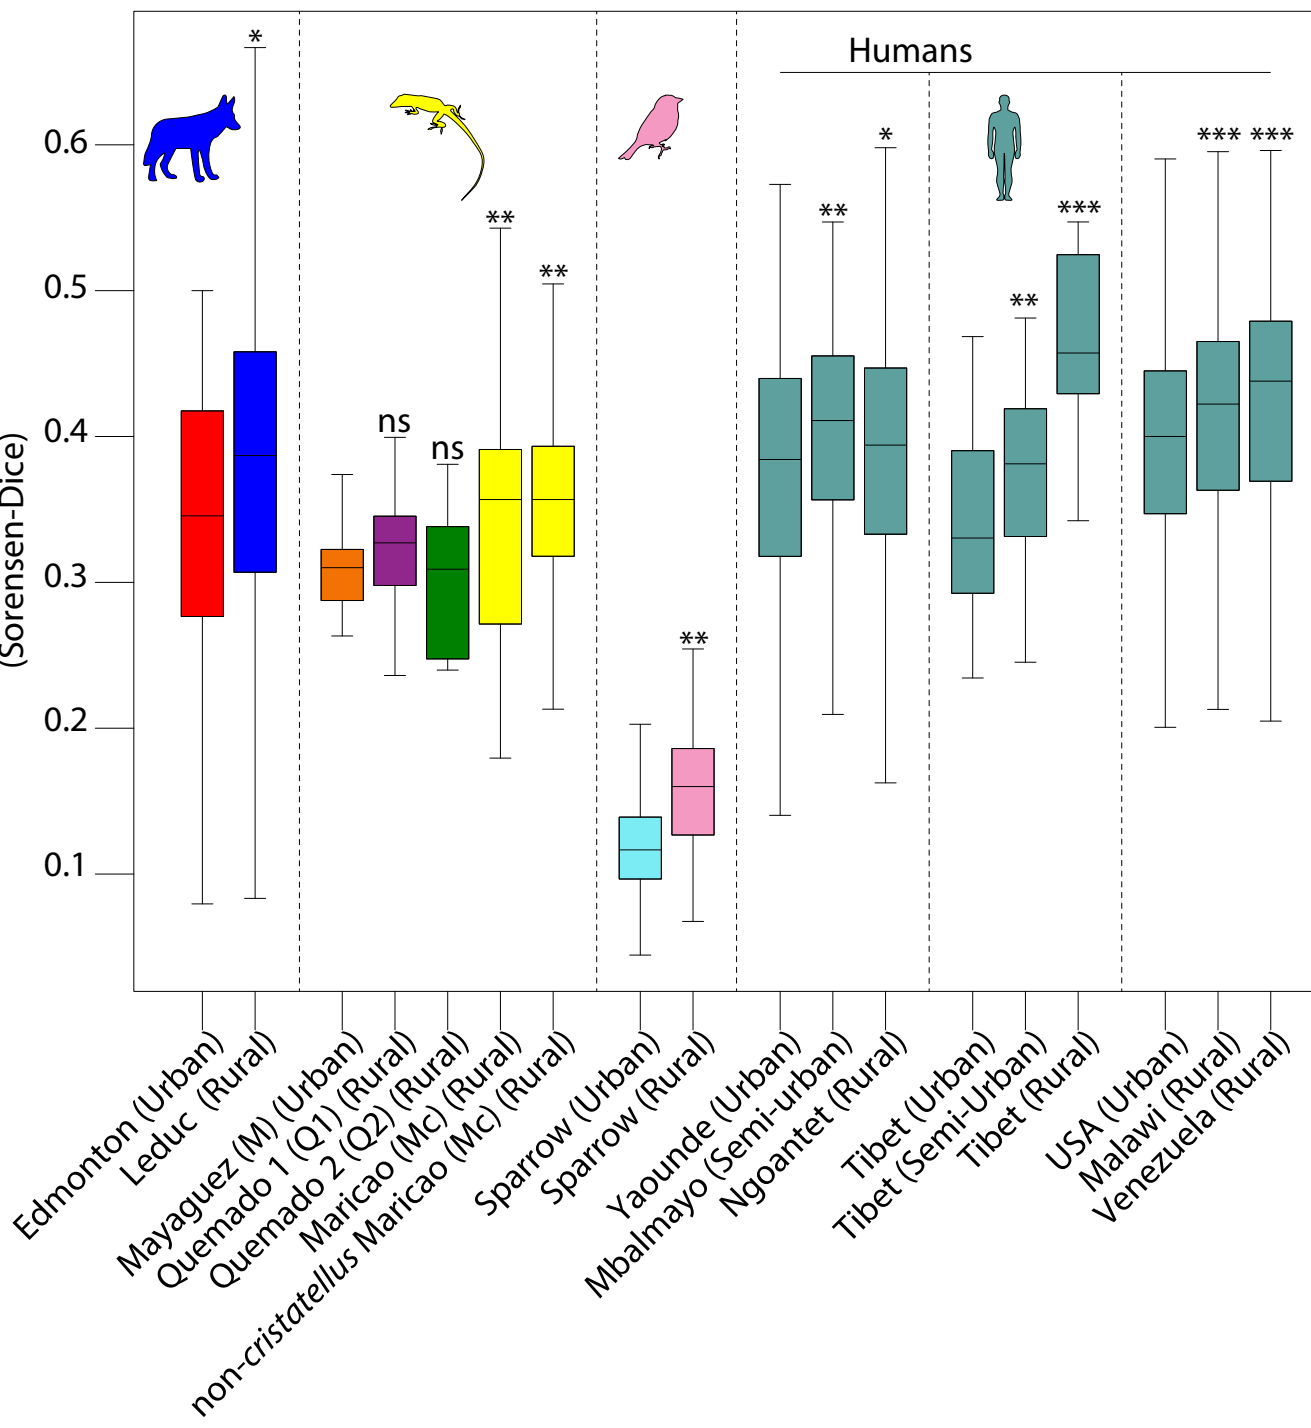

Supplement: supp [file elife-76381-supp-v1.zip]
